# Supplementary material for: RNA-seq and cytological study of sex-specific meiosis response to Gsdf in medaka (Oryzias latipes)
Source: Research Square preprint supplement (doi:10.21203/rs.3.rs-1433778/v1), 2022-03-21

Table S1. The gene list of Venn diagrams from comparisons among different groups RNA-seq data

$|\log_2FC| \geq 3$  up

| Names                                  | total | elements | gene name           | GeneDescription                                                                                           | log2FC-WT vs WTO | log2FC-HmO vs WTO | log2FC-HmT vs WTT | log2FC-HmT vs HmO |
|----------------------------------------|-------|----------|---------------------|-----------------------------------------------------------------------------------------------------------|------------------|-------------------|-------------------|-------------------|
| WTT vs WTO<br>HmO vs WTO<br>HmT vs WTT | 1     | 1        | ENSRORG00000015126  | kbp7<br>FK506 binding protein 7 [Source:ZFIN;Acc:ZDB-GENE-030616-182]                                     | 3.801173182      | 3.202270782       | 3.073996615       | 3.673385009       |
| WTT vs WTO<br>HmO vs WTO<br>HmT vs WTT | 4     | 4        | ENSRORG00000008272  | zcf4h2<br>zinc finger C4H2-type containing [Source:NCBI;gene:Acc:101167375]                               | 4.670202689      | 3.001939255       | 2.030345612       | 3.690909394       |
| WTT vs WTO<br>HmO vs WTO<br>HmT vs WTT | 30    | 30       | ENSRORG00000007203  | spag6<br>sperm associated antigen 6 [Source:NCBI;gene:Acc:101168253]                                      | 3.401705543      | -0.612725443      | 3.952205055       | 7.967121187       |
| WTT vs WTO<br>HmO vs WTO<br>HmT vs WTT | 30    | 30       | ENSRORG00000001873  | dnaaf1<br>dynein, axonemal, assembly factor 1 [Source:ZFIN;Acc:ZDB-GENE-031114-4]                         | 3.118367531      | 0.619486311       | 5.380838146       | 7.880205233       |
| WTT vs WTO<br>HmO vs WTO<br>HmT vs WTT | 30    | 30       | ENSRORG000000013051 | enkur<br>enkurin, TRPC channel interacting protein [Source:NCBI;gene:Acc:101169986]                       | 5.147001118      | -0.300681573      | 4.602585899       | 10.05076366       |
| WTT vs WTO<br>HmO vs WTO<br>HmT vs WTT | 30    | 30       | ENSRORG00000015746  | hormad1<br>HORMA domain containing 1 [Source:ZFIN;Acc:ZDB-GENE-040718-491]                                | 5.361636592      | 2.275749753       | 3.641445334       | 6.727817892       |
| WTT vs WTO<br>HmO vs WTO<br>HmT vs WTT | 30    | 30       | ENSRORG000000021628 | mirna<br>-                                                                                                | 3.94521362       | 2.620853084       | 3.227393539       | 4.552885377       |
| WTT vs WTO<br>HmO vs WTO<br>HmT vs WTT | 30    | 30       | ENSRORG00000016947  | kif17<br>kinesin family member 17 [Source:ZFIN;Acc:ZDB-GENE-080724-12]                                    | 3.062848579      | 0.805654694       | 3.039232322       | 5.29160389        |
| WTT vs WTO<br>HmO vs WTO<br>HmT vs WTT | 30    | 30       | ENSRORG00000014547  | anaaf4<br>-                                                                                               | 17.24992933      | 11.53403533       | 4.719483148       | 10.43584441       |
| WTT vs WTO<br>HmO vs WTO<br>HmT vs WTT | 30    | 30       | ENSRORG00000003037  | TMEM184C<br>transmembrane protein 184C [Source:NCBI;gene:Acc:101168743]                                   | 3.005338236      | 0.703607745       | 3.113399769       | 5.415615663       |
| WTT vs WTO<br>HmO vs WTO<br>HmT vs WTT | 30    | 30       | ENSRORG00000009617  | svca3<br>Oryza latipes synaptosomal complex protein 3 (svca3; mRNA; Source:RefSeq; mRNA:NCM 001104712)    | 3.490019201      | 2.077074777       | 5.051444209       | 6.464240648       |
| WTT vs WTO<br>HmO vs WTO<br>HmT vs WTT | 30    | 30       | ENSRORG00000001938  | armc3<br>armadillo repeat containing 3 [Source:ZFIN;Acc:ZDB-GENE-110614-11]                               | 5.918481962      | 1.37406176        | 4.187000687       | 8.731904075       |
| WTT vs WTO<br>HmO vs WTO<br>HmT vs WTT | 30    | 30       | ENSRORG00000005527  | -                                                                                                         | 5.181814499      | 1.785199432       | 3.857019304       | 7.254121033       |
| WTT vs WTO<br>HmO vs WTO<br>HmT vs WTT | 30    | 30       | ENSRORG00000008020  | ahf8b<br>abhydrolase domain containing 8b [Source:ZFIN;Acc:ZDB-GENE-130530-805]                           | 4.64840339       | 0.320613244       | 4.243109818       | 8.571387196       |
| WTT vs WTO<br>HmO vs WTO<br>HmT vs WTT | 30    | 30       | ENSRORG000000013075 | -                                                                                                         | 5.35643968       | 1.725369874       | 4.034621771       | 7.666171712       |
| WTT vs WTO<br>HmO vs WTO<br>HmT vs WTT | 30    | 30       | ENSRORG000000013475 | fatp7a<br>fatty acid-binding protein, brain [Source:NCBI;gene:Acc:101157499]                              | 3.384558086      | 2.317149192       | 3.747485373       | 4.815379449       |
| WTT vs WTO<br>HmO vs WTO<br>HmT vs WTT | 30    | 30       | ENSRORG000000014719 | -                                                                                                         | 16.55982607      | 10.53928485       | 3.390583379       | 9.411587133       |
| WTT vs WTO<br>HmO vs WTO<br>HmT vs WTT | 30    | 30       | ENSRORG00000012933  | -                                                                                                         | 3.028221324      | 0.178837866       | 3.774448009       | 6.627318723       |
| WTT vs WTO<br>HmO vs WTO<br>HmT vs WTT | 30    | 30       | ENSRORG000000004819 | MCMDC2<br>mitochondrial chromosome maintenance domain containing 2 [Source:NCBI;gene:Acc:101171954]       | 4.038104343      | 0.802118521       | 3.974242655       | 7.210711371       |
| WTT vs WTO<br>HmO vs WTO<br>HmT vs WTT | 30    | 30       | ENSRORG000000017955 | -                                                                                                         | 15.69101174      | 11.16026853       | 4.837521021       | 9.368730495       |
| WTT vs WTO<br>HmO vs WTO<br>HmT vs WTT | 30    | 30       | ENSRORG000000011728 | rme3<br>NME/NUM2 nucleoside diphosphate kinase 3 [Source:NCBI;gene:Acc:101158025]                         | 5.750428695      | 1.769297233       | 3.987446076       | 7.969600099       |
| WTT vs WTO<br>HmO vs WTO<br>HmT vs WTT | 30    | 30       | ENSRORG00000016898  | rsp9<br>radial spoke head 9 homolog [Source:ZFIN;Acc:ZDB-GENE-031120-129]                                 | 4.045387346      | 1.670919497       | 5.686946682       | 6.861902014       |
| WTT vs WTO<br>HmO vs WTO<br>HmT vs WTT | 30    | 30       | ENSRORG00000016753  | cfap206<br>cilia and flagella associated protein 206 [Source:ZFIN;Acc:ZDB-GENE-050922-460]                | 4.142848029      | 1.090518303       | 4.0337407         | 7.086561898       |
| WTT vs WTO<br>HmO vs WTO<br>HmT vs WTT | 30    | 30       | ENSRORG000000021492 | RF00300<br>RNA component of mitochondrial RNA processing endonuclease [Source:HGNC;Symbol:Acc:HGNC:10031] | 4.72022248       | 3.411176536       | 3.743701416       | 5.052334551       |
| WTT vs WTO<br>HmO vs WTO<br>HmT vs WTT | 30    | 30       | ENSRORG00000006147  | svcp3l<br>-                                                                                               | 6.498837043      | 2.942645958       | 3.194605537       | 6.571281581       |
| WTT vs WTO<br>HmO vs WTO<br>HmT vs WTT | 30    | 30       | ENSRORG00000006357  | -                                                                                                         | 3.291119015      | 0.991893353       | 3.182698389       | 5.482408425       |
| WTT vs WTO<br>HmO vs WTO<br>HmT vs WTT | 30    | 30       | ENSRORG00000001282  | -                                                                                                         | 4.21571834       | 0.030128782       | 3.75851546        | 7.94470172        |
| WTT vs WTO<br>HmO vs WTO<br>HmT vs WTT | 30    | 30       | ENSRORG00000009043  | tek2<br>tekin 2 (testicular) [Source:ZFIN;Acc:ZDB-GENE-040113-1]                                          | 15.69916683      | 0                 | 3.45752318        | 19.15718159       |
| WTT vs WTO<br>HmO vs WTO<br>HmT vs WTT | 30    | 30       | ENSRORG000000013191 | atp1a3b<br>ATPase Na+/K+ transporting subunit alpha 3b [Source:ZFIN;Acc:ZDB-GENE-003212-8]                | 3.093073646      | 1.797872154       | 3.008363566       | 4.304050234       |
| WTT vs WTO<br>HmO vs WTO<br>HmT vs WTT | 30    | 30       | ENSRORG000000012392 | -                                                                                                         | 3.895912308      | -0.028241434      | 3.746739059       | 7.67137194        |
| WTT vs WTO<br>HmO vs WTO<br>HmT vs WTT | 30    | 30       | ENSRORG000000090736 | si.ch211-10a23.2<br>si.ch211-10a23.2 [Source:ZFIN;Acc:ZDB-GENE-090313-9]                                  | 3.146303838      | -1.252440945      | 5.094284985       | 4.98551284        |
| WTT vs WTO<br>HmO vs WTO<br>HmT vs WTT | 30    | 30       | ENSRORG000000013668 | -                                                                                                         | 3.414812292      | -0.940824723      | 4.899652536       | 9.255774646       |
| HmO vs WTO<br>HmT vs WTT               | 6     | 6        | ENSRORG000000011773 | c2rx1<br>purinergic receptor P2X, ligand-gated ion channel, 1 [Source:ZFIN;Acc:ZDB-GENE-030319-1]         | 3.10262546       | 3.797133995       | 4.908527298       | 4.21450558        |
| HmO vs WTO<br>HmT vs WTT               | 6     | 6        | ENSRORG00000006520  | svcp1<br>synaptosomal complex protein 1 [Source:ZFIN;Acc:ZDB-GENE-040110-8]                               | -3.48940562      | 4.308072185       | -11.9257876       | 4.127856045       |
| HmO vs WTO<br>HmT vs WTT               | 6     | 6        | ENSRORG00000007440  | chmp6a<br>chaperon multivesicular body protein 6a [Source:ZFIN;Acc:ZDB-GENE-100812-5]                     | -5.257084553     | 3.537651066       | 11.82570973       | 3.037743296       |
| HmO vs WTO<br>HmT vs WTT               | 6     | 6        | ENSRORG00000007240  | sema7a<br>semaphorin 7A [Source:ZFIN;Acc:ZDB-GENE-030131-3633]                                            | 1.177530426      | 3.116252093       | 5.514952305       | 5.576714422       |
| HmO vs WTO<br>HmT vs WTT               | 6     | 6        | ENSRORG000000010797 | -                                                                                                         | 2.322935831      | 3.288275621       | 5.428895759       | 4.464040894       |
| HmO vs WTO<br>HmT vs WTT               | 6     | 6        | ENSRORG00000001409  | -                                                                                                         | -0.793799823     | 4.039038248       | 8.427469203       | 3.595114735       |
| HmO vs WTO<br>HmT vs WTT               | 6     | 6        | ENSRORG000000009233 | -                                                                                                         | 4.580801179      | 3.081195483       | -1.94664064       | -0.446548491      |
| HmO vs WTO<br>HmT vs WTT               | 6     | 6        | ENSRORG000000045818 | -                                                                                                         | 5.158711987      | 4.673039855       | 5.97670247        | 1.881684417       |
| HmO vs WTO<br>HmT vs WTT               | 6     | 6        | ENSRORG00000008275  | gls2b<br>GLS family zinc finger 2b [Source:ZFIN;Acc:ZDB-GENE-091204-120]                                  | 4.554374498      | 3.40222678        | -1.955998538      | -0.803556714      |
| HmO vs WTO<br>HmT vs WTT               | 6     | 6        | ENSRORG00000007164  | ctdnp15a<br>ctdnp15 [Source:NCBI;gene:Acc:101168324]                                                      | 3.867797188      | 3.030968052       | -4.227702634      | -3.390375485      |
| HmO vs WTO<br>HmT vs WTT               | 6     | 6        | ENSRORG00000016486  | nrs1a<br>nuclear receptor subfamily 5 group A member 1 [Source:NCBI;gene:Acc:100045260]                   | 5.535095217      | -0.793208992      | 1.632754445       | 7.94470172        |
| HmO vs WTO<br>HmT vs WTT               | 6     | 6        | ENSRORG000000016145 | tmem45a<br>transmembrane protein 45A [Source:NCBI;gene:Acc:101171567]                                     | 6.109702883      | 3.43034209        | -1.751838184      | 0.928003373       |
| HmO vs WTO<br>HmT vs WTT               | 6     | 6        | ENSRORG00000009249  | prospasin<br>[Source:NCBI;gene:Acc:101171262]                                                             | 4.765464582      | 3.081077362       | -1.792262926      | -0.10739668       |
| HmO vs WTO<br>HmT vs WTT               | 6     | 6        | ENSRORG000000050438 | zpc194189<br>zpc194189 [Source:ZFIN;Acc:ZDB-GENE-081022-71]                                               | 3.430019852      | 3.115729604       | 0.94056127        | 1.25342151        |
| HmO vs WTO<br>HmT vs WTT               | 6     | 6        | ENSRORG000000061008 | coxs5a<br>COXc finger protein 5a [Source:ZFIN;Acc:ZDB-GENE-030131-3178]                                   | 3.366420691      | 3.170021278       | -0.976654125      | -0.779769456      |
| HmO vs WTO<br>HmT vs WTT               | 6     | 6        | ENSRORG00000007008  | rsp1b<br>cysteine and glycine-rich protein 1b [Source:ZFIN;Acc:ZDB-GENE-070112-252]                       | 4.580562905      | 3.037426078       | -0.223655733      | 1.319662117       |

$|\log_2FC| \geq 3$  down

| Names                    | total | elements | gene name           | GeneDescription                                                                                                       | log2FC-WT vs WTO | log2FC-HmO vs WTO | log2FC-HmT vs WTT | log2FC-HmT vs HmO |
|--------------------------|-------|----------|---------------------|-----------------------------------------------------------------------------------------------------------------------|------------------|-------------------|-------------------|-------------------|
| WTT vs WTO<br>HmO vs WTO | 16    | 16       | ENSRORG00000014606  | NTRK3<br>neurotrophic receptor tyrosine kinase 3 [Source:HGNC;Symbol:Acc:HGNC:8033]                                   | -3.37668132      | -3.216840924      | 0.300574514       | 0.146019859       |
| WTT vs WTO<br>HmO vs WTO | 16    | 16       | ENSRORG00000016104  | -                                                                                                                     | -7.128524338     | -16.00404113      | -8.875534352      | 0                 |
| WTT vs WTO<br>HmO vs WTO | 16    | 16       | ENSRORG000000000570 | TNNI2 (1)<br>tropomyosin I, fast skeletal muscle [Source:NCBI;gene:Acc:101156490]                                     | -3.191024219     | -5.324663484      | -2.621071894      | -0.486985441      |
| WTT vs WTO<br>HmO vs WTO | 16    | 16       | ENSRORG00000001935  | svr3<br>synaptotagmin III [Source:ZFIN;Acc:ZDB-GENE-090601-1]                                                         | -3.604557606     | -7.158526943      | -1.201389837      | 2.353063576       |
| WTT vs WTO<br>HmO vs WTO | 16    | 16       | ENSRORG000000013345 | plp4p<br>phospholipid phosphatase 4 [Source:ZFIN;Acc:ZDB-GENE-081107-53]                                              | -5.775132987     | -3.42178265       | 1.292340684       | -1.060524492      |
| WTT vs WTO<br>HmO vs WTO | 16    | 16       | ENSRORG000000012562 | -                                                                                                                     | -15.6313135      | -3.586601224      | 12.45774253       | 0.413518865       |
| WTT vs WTO<br>HmO vs WTO | 16    | 16       | ENSRORG000000013180 | hcn4<br>hyperpolarization activated cyclic nucleotide-gated potassium channel 4 [Source:ZFIN;Acc:ZDB-GENE-090420-368] | -5.520600743     | -3.609917053      | 2.25459279        | 0.344393394       |
| WTT vs WTO<br>HmO vs WTO | 16    | 16       | ENSRORG00000008586  | -                                                                                                                     | -6.153054236     | -7.094404599      | -0.985420187      | -0.043584266      |
| WTT vs WTO<br>HmO vs WTO | 16    | 16       | ENSRORG00000005962  | tpst1a<br>tryptophan hydroxylase 1 (tryptophan 5-monoxygenase) a [Source:ZFIN;Acc:ZDB-GENE-030317-1]                  | -5.318721649     | -5.266341765      | -1.00095381       | -1.052848972      |
| WTT vs WTO<br>HmO vs WTO | 16    | 16       | ENSRORG000000011011 | sidcy3-3a<br>dispatched RND transporter family member 3 [Source:HGNC;Symbol:Acc:HGNC:29251]                           | -3.030521536     | -7.158455428      | -0.001542419      | 4.126900489       |
| WTT vs WTO<br>HmO vs WTO | 16    | 16       | ENSRORG000000018234 | -                                                                                                                     | -7.32900042      | -4.203537088      | -8.875534352      | 12.70009473       |
| WTT vs WTO<br>HmO vs WTO | 16    | 16       | ENSRORG00000003268  | cadm2b<br>cell adhesion molecule 2b [Source:ZFIN;Acc:ZDB-GENE-080506-3]                                               | -4.476828973     | -7.123990594      | -1.041316215      | 1.606329409       |
| WTT vs WTO<br>HmO vs WTO | 16    | 16       | ENSRORG00000004627  | -                                                                                                                     | -4.978265703     | -5.87256815       | 1.203839551       | 2.09862149        |
| WTT vs WTO<br>HmO vs WTO | 16    | 16       | ENSRORG000000012851 | -                                                                                                                     | -4.529760306     | -3.512269645      | -6.89209645       | -2.706210517      |
| WTT vs WTO<br>HmO vs WTO | 16    | 16       | ENSRORG00000004712  | igfbp3<br>cartilage intermediate layer protein 2 [Source:NCBI;gene:Acc:101160704]                                     | -17.89338325     | -3.412911291      | 12.79861028       | -1.681470732      |
| WTT vs WTO<br>HmO vs WTO | 16    | 16       | ENSRORG000000006007 | sou5<br>insulin like growth factor 2 mRNA binding protein 3 [Source:NCBI;gene:Acc:101156590]                          | -3.34732611      | -0.139165108      | -0.584014591      | -3.791717068      |
| WTT vs WTO<br>HmO vs WTO | 16    | 16       | ENSRORG000000050780 | sou5s<br>heme-binding protein sou5 [Source:ZFIN;Acc:ZDB-GENE-110718-2]                                                | -4.101978636     | 3.324966349       | 2.239382023       | -5.18078109       |
| WTT vs WTO<br>HmO vs WTO | 16    | 16       | ENSRORG000000014006 | -                                                                                                                     | -6.035524567     | -0.422907397      | -3.775135553      | -9.387266969      |
| WTT vs WTO<br>HmO vs WTO | 16    | 16       | ENSRORG00000004261  | -                                                                                                                     | -9.959317565     | -0.596678364      | -0.240205179      | -9.602300028      |
| WTT vs WTO<br>HmO vs WTO | 16    | 16       | ENSRORG000000014984 | nof12<br>nuclear protein 12 [Source:ZFIN;Acc:ZDB-GENE-040426-135]                                                     | -5.758764739     | -0.85705846       | 0.016121256       | -4.885119024      |
| WTT vs WTO<br>HmO vs WTO | 16    | 16       | ENSRORG000000011808 | acs15<br>acyl-CoA synthetase long chain family member 5 [Source:ZFIN;Acc:ZDB-GENE-040312-168]                         | -6.60350302      | 2.384954716       | 4.305279512       | -3.682691849      |
| WTT vs WTO<br>HmO vs WTO | 16    | 16       | ENSRORG00000000414  | -                                                                                                                     | -10.33132084     | -0.263845399      | 1.088052005       | 8.979547119       |
| WTT vs WTO<br>HmO vs WTO | 16    | 16       | ENSRORG00000002623  | serpin7<br>serine protease inhibitor A3N [Source:NCBI;gene:Acc:101156256]                                             | -10.76704875     | -0.779749921      | -5.892631449      | -9.447560733      |
| WTT vs WTO<br>HmO vs WTO | 16    | 16       | ENSRORG000000012026 | -                                                                                                                     | -9.87030655      | 0.088659972       | -1.80116748       | -11.84132946      |
| WTT vs WTO<br>HmO vs WTO | 16    | 16       | ENSRORG000000002190 | hxd3b7<br>3 beta-hydroxysteroid dehydrogenase type 7 [Source:NCBI;gene:Acc:101172816]                                 | -9.594825302     | -1.340873331      | 0.687474671       | -7.559901713      |
| WTT vs WTO<br>HmO vs WTO | 16    | 16       | ENSRORG000000003684 | svcp1<br>synaptosomal complex protein 1 [Source:NCBI;gene:Acc:101172816]                                              | -3.904746749     | 0.703167331       | 0.006757968       | -4.600670936      |
| WTT vs                   |       |          |                     |                                                                                                                       |                  |                   |                   |                   |

|  |                           |                  |                                                                                        |             |                                                           |              |              |              |              |
|--|---------------------------|------------------|----------------------------------------------------------------------------------------|-------------|-----------------------------------------------------------|--------------|--------------|--------------|--------------|
|  | ENSRLO00000006626         | colgalt1         | collagen beta1-O-galactosyltransferase 1 [Source:ZFIN;Acc:ZDB-GENE-010720-6]           | 3.745018625 | 3.628952646                                               | 0.663240725  | 1.145892766  |              |              |
|  | ENSRLO000000013447        | serpinf1         | serpin family F member 1 [Source:NCBI gene:Acc:101160187]                              | 4.912306731 | 3.796536828                                               | -1.18090841  | -0.064653555 |              |              |
|  | ENSRLO000000014624        | angptl1a         | angiopoietin-like 1a [Source:ZFIN;Acc:ZDB-GENE-040724-269]                             | 3.560295457 | 3.024937164                                               | -0.85092516  | -0.315078264 |              |              |
|  | ENSRLO000000017193        | ddr2l            | discoidin domain receptor family, member 2, like [Source:ZFIN;Acc:ZDB-GENE-041210-162] | 4.344688418 | 3.054914442                                               | -1.139688763 | 0.150770164  |              |              |
|  | ENSRLO00000001293         | igfb9b           | immunoglobulin superfamily, member 9b [Source:ZFIN;Acc:ZDB-GENE-060810-28]             | 6.382557233 | 3.989783341                                               | -0.410483294 | 1.982774881  |              |              |
|  | ENSRLO00000017301         | um_nsa82l        | terastatinin 4 [Source:NCBI gene:Acc:101157219]                                        | 4.309331461 | 3.448827947                                               | -1.214868269 | -0.354879143 |              |              |
|  | ENSRLO00000013074         | um_nsa82l        | un-named s82l [Source:ZFIN;Acc:ZDB-GENE-120727-16]                                     | 3.9631043   | 3.809150471                                               | -0.147461252 | 0.006980044  |              |              |
|  | ENSRLO00000006002         | mpeg1.2          | macrophage expressed 1, tandem duplicate 2 [Source:ZFIN;Acc:ZDB-GENE-050522-305]       | 4.452615538 | 4.141305187                                               | -0.356965889 | -0.045173012 |              |              |
|  | ENSRLO00000004846         | dnase2b          | deoxyribonuclease II beta [Source:ZFIN;Acc:ZDB-GENE-090824-2]                          | 3.675401599 | 3.133134863                                               | -0.488262893 | 0.054488991  |              |              |
|  | ENSRLO00000006278         | s100a1           | S100 calcium binding protein A1 [Source:NCBI gene:Acc:101155142]                       | 4.19254494  | 4.174137923                                               | -0.10941416  | -0.090521211 |              |              |
|  | ENSRLO00000007058         | anxa6            | annexin A6 [Source:NCBI gene:Acc:101156586]                                            | 4.105175152 | 3.703422815                                               | -0.86569195  | -0.26240545  |              |              |
|  | ENSRLO00000005565         | bmpr1ba          | bone morphogenetic protein receptor type 1B [Source:NCBI gene:Acc:101171086]           | 3.90067193  | 3.637971359                                               | 1.175588209  | 1.438773478  |              |              |
|  | ENSRLO00000008324         | zgc:172352       | nck-associated protein 1-like [Source:NCBI gene:Acc:101159814]                         | 3.712113041 | 3.218810188                                               | 0.052097993  | 0.545886894  |              |              |
|  | ENSRLO000000010254        | akr4b            | atypical chemokine receptor 4b [Source:ZFIN;Acc:ZDB-GENE-051107-10]                    | 3.004530137 | 3.144574051                                               | -0.565896916 | -0.705454963 |              |              |
|  | ENSRLO00000002043         | anxa6            | annexin A6 [Source:NCBI gene:Acc:101156586]                                            | 4.285884495 | 3.031618328                                               | -1.170240815 | 0.084510185  |              |              |
|  | ENSRLO00000011703         | ctcd4            | potassium channel tetramerization domain containing 4 [Source:NCBI gene:Acc:101164601] | 3.748706433 | 3.151768938                                               | -0.116279388 | -0.420892999 |              |              |
|  | ENSRLO00000015490         | erfs1            | immediate early response 5-like [Source:ZFIN;Acc:ZDB-GENE-030311-5134]                 | 5.500289208 | 6.118063842                                               | 2.456587776  | 1.98191522   |              |              |
|  | ENSRLO000000013481        | si:skey-178e17.3 | si:skey-178e17.3 [Source:ZFIN;Acc:ZDB-GENE-081104-335]                                 | 5.509917505 | 3.455299644                                               | -0.163210056 | 1.891891522  |              |              |
|  | ENSRLO00000002270         | zfn              | zinc finger protein [Source:ZFIN;Acc:ZDB-GENE-040912-110]                              | 5.001963571 | 3.065833103                                               | -1.300395401 | 0.636219833  |              |              |
|  | ENSRLO00000002674         | zfn              | zinc finger protein [Source:ZFIN;Acc:ZDB-GENE-040912-110]                              | 5.569741954 | 4.557056000                                               | 0.108013835  | 1.121192114  |              |              |
|  | ENSRLO000000013448        | zfn              | zinc finger protein [Source:ZFIN;Acc:ZDB-GENE-040912-110]                              | 4.929396939 | 3.290174931                                               | 0.181745387  | 1.881442427  |              |              |
|  | ENSRLO00000004473         | zfn              | zinc finger protein [Source:ZFIN;Acc:ZDB-GENE-040912-110]                              | 5.589762363 | 3.269667132                                               | -0.354407136 | 1.91601473   |              |              |
|  | ENSRLO00000016844         | zfn              | zinc finger protein [Source:ZFIN;Acc:ZDB-GENE-040912-110]                              | 4.362784547 | 3.800078539                                               | -0.930139638 | -0.366946933 |              |              |
|  | ENSRLO00000002228         | zfn              | zinc finger protein [Source:ZFIN;Acc:ZDB-GENE-040912-110]                              | 7.46092527  | 5.008898361                                               | -1.134248689 | 1.31938687   |              |              |
|  | ENSRLO00000003041         | zfn              | zinc finger protein [Source:ZFIN;Acc:ZDB-GENE-040912-110]                              | 4.485563887 | 4.33654841                                                | -0.140310077 | 1.009245542  |              |              |
|  | ENSRLO00000002668         | zfn              | zinc finger protein [Source:ZFIN;Acc:ZDB-GENE-040912-110]                              | 5.572424885 | 3.03447117                                                | 4.93587581   | -2.397436318 |              |              |
|  | ENSRLO000000015826        | zfn              | zinc finger protein [Source:ZFIN;Acc:ZDB-GENE-040912-110]                              | 6.505387739 | 4.201659903                                               | -1.409248361 | 0.894962352  |              |              |
|  | ENSRLO00000002139         | zfn              | zinc finger protein [Source:ZFIN;Acc:ZDB-GENE-040912-110]                              | 4.225939665 | 3.328211321                                               | -0.916178276 | -0.017966824 |              |              |
|  | ENSRLO000000013415        | zfn              | zinc finger protein [Source:ZFIN;Acc:ZDB-GENE-040912-110]                              | 5.991976868 | 4.615823048                                               | -0.897384126 | 0.489274302  |              |              |
|  | ENSRLO000000009908        | zfn              | zinc finger protein [Source:ZFIN;Acc:ZDB-GENE-040912-110]                              | 4.633354668 | 4.901017706                                               | 0.501445668  | 0.234267601  |              |              |
|  | ENSRLO000000010534        | zfn              | zinc finger protein [Source:ZFIN;Acc:ZDB-GENE-040912-110]                              | 3.232291343 | 3.082946568                                               | 0.04948792   | 0.199779177  |              |              |
|  | ENSRLO000000009095        | zfn              | zinc finger protein [Source:ZFIN;Acc:ZDB-GENE-040912-110]                              | 3.192811449 | 3.72868243                                                | 1.046918681  | 0.511533985  |              |              |
|  | ENSRLO00000005483         | zfn              | zinc finger protein [Source:ZFIN;Acc:ZDB-GENE-040912-110]                              | 3.378609096 | 3.131218331                                               | 1.074791133  | 0.122659586  |              |              |
|  | ENSRLO000000017221        | zfn              | zinc finger protein [Source:ZFIN;Acc:ZDB-GENE-040912-110]                              | 3.163302576 | 3.24047036                                                | 1.085841148  | 1.009157924  |              |              |
|  | ENSRLO000000016332        | zfn              | zinc finger protein [Source:ZFIN;Acc:ZDB-GENE-040912-110]                              | 4.076351308 | 3.328662808                                               | -0.157003943 | 0.529395781  |              |              |
|  | ENSRLO000000012432        | zfn              | zinc finger protein [Source:ZFIN;Acc:ZDB-GENE-040912-110]                              | 5.59426031  | 4.162842957                                               | -0.318622097 | 0.894845799  |              |              |
|  | ENSRLO000000021202        | zfn              | zinc finger protein [Source:ZFIN;Acc:ZDB-GENE-040912-110]                              | 4.487087377 | 3.553296232                                               | 0.478041659  | 1.412317982  |              |              |
|  | ENSRLO000000013987        | zfn              | zinc finger protein [Source:ZFIN;Acc:ZDB-GENE-040912-110]                              | 3.785898422 | 3.995471535                                               | -0.072409573 | -0.308806791 |              |              |
|  | ENSRLO000000003310        | zfn              | zinc finger protein [Source:ZFIN;Acc:ZDB-GENE-040912-110]                              | 6.233755506 | 6.470037049                                               | -0.233378454 | -0.469183417 |              |              |
|  | ENSRLO000000002105        | zfn              | zinc finger protein [Source:ZFIN;Acc:ZDB-GENE-040912-110]                              | 3.071497261 | 4.332353518                                               | 0.597602419  | -0.653789662 |              |              |
|  | WTT VS WTO<br>HMT VS HMTc | 382              | ENSRLO000000002103                                                                     | zfn         | zinc finger protein [Source:ZFIN;Acc:ZDB-GENE-040912-110] | 7.728486009  | 3.826130661  | -1.815920944 | -2.069919601 |
|  | ENSRLO000000002035        | zfn              | zinc finger protein [Source:ZFIN;Acc:ZDB-GENE-040912-110]                              | 4.195638742 | 0.934616169                                               | 0.750348152  | 4.011855596  |              |              |
|  | ENSRLO000000015810        | zfn              | zinc finger protein [Source:ZFIN;Acc:ZDB-GENE-040912-110]                              | 3.290076829 | 1.156680513                                               | 1.289776812  | 3.423657784  |              |              |
|  | ENSRLO000000007494        | zfn              | zinc finger protein [Source:ZFIN;Acc:ZDB-GENE-040912-110]                              | 4.822878581 | 1.665182985                                               | 0.333252751  | 3.491433659  |              |              |
|  | ENSRLO000000006837        | zfn              | zinc finger protein [Source:ZFIN;Acc:ZDB-GENE-040912-110]                              | 5.731809044 | 0.1418744                                                 | -1.315140363 | 4.275279989  |              |              |
|  | ENSRLO000000004516        | zfn              | zinc finger protein [Source:ZFIN;Acc:ZDB-GENE-040912-110]                              | 5.416735371 | 0.994368264                                               | 0.215755223  | 4.638609112  |              |              |
|  | ENSRLO00000005707         | zfn              | zinc finger protein [Source:ZFIN;Acc:ZDB-GENE-040912-110]                              | 4.758728158 | 1.821237526                                               | 0.951363418  | 0.689338418  |              |              |
|  | ENSRLO000000014593        | zfn              | zinc finger protein [Source:ZFIN;Acc:ZDB-GENE-040912-110]                              | 4.805610066 | -4.16872233                                               | -5.88233721  | 3.392538533  |              |              |
|  | ENSRLO00000017054         | zfn              | zinc finger protein [Source:ZFIN;Acc:ZDB-GENE-040912-110]                              | 4.745511711 | 1.56607348                                                | 0.3388008    | 3.27191162   |              |              |
|  | ENSRLO000000007716        | zfn              | zinc finger protein [Source:ZFIN;Acc:ZDB-GENE-040912-110]                              | 4.99533571  | 2.417644998                                               | 0.91902264   | 3.491732627  |              |              |
|  | ENSRLO00000004820         | zfn              | zinc finger protein [Source:ZFIN;Acc:ZDB-GENE-040912-110]                              | 7.801880415 | 3.70995376                                                | 1.215188895  | 5.300937369  |              |              |
|  | ENSRLO000000013055        | zfn              | zinc finger protein [Source:ZFIN;Acc:ZDB-GENE-040912-110]                              | 17.03811554 | 1.621517901                                               | 2.582887165  | 7.006293257  |              |              |
|  | ENSRLO000000012384        | zfn              | zinc finger protein [Source:ZFIN;Acc:ZDB-GENE-040912-110]                              | 3.09753812  | 1.90359093                                                | 2.200716254  | 3.395148652  |              |              |
|  | ENSRLO000000016618        | zfn              | zinc finger protein [Source:ZFIN;Acc:ZDB-GENE-040912-110]                              | 4.294789863 | 0.306711782                                               | 0.51011374   | 4.498675752  |              |              |
|  | ENSRLO000000007136        | zfn              | zinc finger protein [Source:ZFIN;Acc:ZDB-GENE-040912-110]                              | 5.543341965 | -0.54004394                                               | -2.487810539 | 3.596064188  |              |              |
|  | ENSRLO000000018416        | zfn              | zinc finger protein [Source:ZFIN;Acc:ZDB-GENE-040912-110]                              | 4.539148576 | 0.554958555                                               | -0.486351559 | 3.496327229  |              |              |
|  | ENSRLO000000006929        | zfn              | zinc finger protein [Source:ZFIN;Acc:ZDB-GENE-040912-110]                              | 3.46962808  | 0.178627175                                               | 1.671589068  | 4.963070207  |              |              |
|  | ENSRLO000000010463        | zfn              | zinc finger protein [Source:ZFIN;Acc:ZDB-GENE-040912-110]                              | 3.464233771 | 1.23059428                                                | 1.189676058  | 3.423801719  |              |              |
|  | ENSRLO000000011524        | zfn              | zinc finger protein [Source:ZFIN;Acc:ZDB-GENE-040912-110]                              | 6.199684052 | -0.357304146                                              | -2.184601511 | 4.372869241  |              |              |
|  | ENSRLO000000011173        | zfn              | zinc finger protein [Source:ZFIN;Acc:ZDB-GENE-040912-110]                              | 3.771821928 | -0.79904027                                               | -0.351779784 | 4.21956955   |              |              |
|  | RF00067                   | zfn              | zinc finger protein [Source:ZFIN;Acc:ZDB-GENE-040912-110]                              | 6.315783827 | 2.03824576                                                | -1.028012875 | 3.253006553  |              |              |
|  | ENSRLO00000001105         | zfn              | zinc finger protein [Source:ZFIN;Acc:ZDB-GENE-040912-110]                              | 4.598042221 | 1.145527033                                               | 3.25201269   | 3.25201269   |              |              |

|  |                    |            |                                                                                                                            |   |   |              |              |              |              |
|--|--------------------|------------|----------------------------------------------------------------------------------------------------------------------------|---|---|--------------|--------------|--------------|--------------|
|  | ENSRLO000000013640 | -          | uncharacterized LOC101174542 [Source:NCBI gene:Acc:101174542]                                                              | - | - | -21.58527381 | 0.840440035  | 0            | -27.42568084 |
|  | ENSRLO000000009100 | -          | cell death-inducing c53-target protein 1 [Source:NCBI gene:Acc:101167680]                                                  | - | - | -8.239827409 | 0.99610957   | 4.458462335  | -4.776988707 |
|  | ENSRLO000000000170 | -          | -                                                                                                                          | - | - | -4.14048938  | 0.345512436  | -0.157896243 | -4.643413638 |
|  | ENSRLO000000018838 | -          | -                                                                                                                          | - | - | -3.897887637 | -0.621853955 | -0.467765405 | -3.743314335 |
|  | ENSRLO000000015343 | slc7a6     | solute carrier family 7 (amino acid transporter light chain, lysyl system), member 6 [Source:ZFIN;Acc:ZDB-GENE-000607-211] | - | - | -7.976256403 | -0.735475826 | -0.0665339   | 7.30694927   |
|  | ENSRLO00000016451  | -          | -                                                                                                                          | - | - | -19.95702683 | 1.07547097   | 17.8698788   | 3.162905102  |
|  | ENSRLO000000015704 | -          | -                                                                                                                          | - | - | -18.04123926 | -0.227411347 | 13.87664446  | -3.934684136 |
|  | ENSRLO000000011397 | -          | -                                                                                                                          | - | - | -5.326446655 | -0.04366923  | 1.30665226   | -3.975451802 |
|  | ENSRLO000000012996 | sidkayp-1b | si:skayp-17h1.4 [Source:ZFIN;Acc:ZDB-GENE-050208-18]                                                                       | - | - | -5.116160922 | 0.150826531  | -0.963226758 | 6.279228524  |
|  | ENSRLO000000000479 | gtf2a1     | general transcription factor IIA, 1-like [Source:ZFIN;Acc:ZDB-GENE-060329-28]                                              | - | - | -3.674165341 | -0.636473602 | -2.295757238 | 5.333964076  |
|  | ENSRLO000000010924 | gtf2a1     | general transcription factor IIA, 1-like [Source:ZFIN;Acc:ZDB-GENE-060329-28]                                              | - | - | -4.045258778 | -1.00748365  | -0.178606576 | -3.755533956 |
|  | ENSRLO00000009822  | gpc3       | glypican 3 [Source:ZFIN;Acc:ZDB-GENE-031212-11]                                                                            | - | - | -3.182619467 | -0.296363514 | -0.793020037 | -3.678791    |
|  | ENSRLO00000013664  | hsn1a      | hsc70 heat shock protein 1a [Source:ZFIN;Acc:ZDB-GENE-031009-1]                                                            | - | - | -3.580779276 | -0.295431017 | -1.635279373 | -4.930142631 |
|  | ENSRLO00000005824  | gnrh3      | Gonadotropin-releasing hormone 3 (gon3), mRNA [Source:RefSeq mRNA:NCNM_001104672]                                          | - | - | -16.42658686 | 3.298120449  | 10.25296104  | -9.471256466 |
|  | ENSRLO000000006614 | -          | -                                                                                                                          | - | - | -10.73578175 | -0.39239789  | 2.157105336  | -8.18579271  |
|  | ENSRLO000000008830 | -          | -                                                                                                                          | - | - | -10.33278894 | 0.455950359  | -0.170718952 | -10.95887253 |
|  | ENSRLO000000013324 | -          | -                                                                                                                          | - | - | -9.91431089  | -0.549933217 | -0.444552114 | -9.608453389 |
|  | ENSRLO00000000290  | pen1tm2    | penicillin 2 [Source:NCBI gene:Acc:101167661]                                                                              | - | - | -6.50391388  | 0.207551616  | 1.064905247  | -5.6926777   |
|  | ENSRLO000000017272 | oclnb      | occludin b [Source:ZFIN;Acc:ZDB-GENE-041212-43]                                                                            | - | - | -7.075948023 | -0.503678923 | 1.81226858   | -4.719515466 |
|  | ENSRLO00000006269  | YBX2       | Y-box binding protein 2 [Source:NCBI gene:Acc:100049372]                                                                   | - | - | -4.198005851 | -0.136937094 | -0.680888234 | -4.741472072 |
|  | ENSRLO000000011305 | -          | -                                                                                                                          | - | - | -7.277335004 | -0.581857077 | 3.063743439  | -3.631248282 |
|  | ENSRLO000000002186 | -          | -                                                                                                                          | - | - | -5.510047101 | 2.718972471  | 5.424886219  | 3.10460458   |
|  | ENSRLO00000000299  | -          | -                                                                                                                          | - | - | -9.730075951 | -1.185624324 | -2.882378441 | -11.40643640 |
|  | ENSRLO000000009392 | anxa13     | annexin A13, like [Source:ZFIN;Acc:ZDB-GENE-050522-310]                                                                    | - | - | -5.913651339 | -0.664168089 | -1.111267295 | 7.68880392   |



|                     |                  |                                                                                                     |             |              |              |             |
|---------------------|------------------|-----------------------------------------------------------------------------------------------------|-------------|--------------|--------------|-------------|
| ENSRORG0000017144   | cdkn2c           | cyclin-dependent kinase inhibitor 2C (p18, inhibits CDK4) [Source:ZFIN;Acc:ZDB-GENE-081104-145]     | 16.78895875 | 13.61802524  | 2.175288347  | 5.346589436 |
| ENSRORG0000007279   | -                | -                                                                                                   | 16.31224713 | 13.81647671  | 2.64052061   | 5.136789938 |
| ENSRORG0000001205   | l10              | coagulation factor X [Source:ZFIN;Acc:ZDB-GENE-021206-9]                                            | 4.608270659 | 2.49739447   | 1.611704987  | 3.723065727 |
| ENSRORG0000002094   | ompa             | olfactory marker protein a [Source:ZFIN;Acc:ZDB-GENE-050526-118]                                    | 3.91927582  | 1.869719268  | 2.057911325  | 4.107953816 |
| ENSRORG00000008740  | sidkey-943a      | sidkey-943a [Source:ZFIN;Acc:ZDB-GENE-110914-175]                                                   | 4.211474052 | 1.699933139  | 0.622589191  | 3.134617257 |
| ENSRORG00000016013  | agmat            | agmatine ureohydrolase (agmatinase) [Source:ZFIN;Acc:ZDB-GENE-080929-696]                           | 5.322016072 | 1.210188821  | -1.017446946 | 3.094866307 |
| ENSRORG0000005514   | cef1             | centa-EF-hand domain containing 1 [Source:ZFIN;Acc:ZDB-GENE-040601-259]                             | 4.217235548 | 1.087070447  | 0.514710327  | 3.645360094 |
| ENSRORG00000008980  | -                | -                                                                                                   | 5.895270016 | 0.759538364  | -0.568398662 | 4.567803489 |
| ENSRORG00000004118  | STRADB           | STB2-related kinase adaptor beta [Source:HGNC Symbol;Acc:HGNC:13205]                                | 5.493472527 | 1.596834018  | 1.336802875  | 5.231924979 |
| ENSRORG00000016512  | ofa              | Oryzias latipes transferin (LOC100144362), mRNA [Source:RefSeq; mRNMAccess:NM_001122932]            | 4.958837946 | 1.396252138  | 0.124325105  | 3.685395528 |
| ENSRORG0000007135   | mytqhb           | myosin binding protein HB [Source:ZFIN;Acc:ZDB-GENE-030131-979A]                                    | 3.289160893 | -0.594059504 | 0.710440667  | 4.594147251 |
| ENSRORG00000017709  | c10a3b           | complement component 1, s subcomponent-like 3b [Source:ZFIN;Acc:ZDB-GENE-040426-180B]               | 3.310690759 | 0.167831726  | -0.109096676 | 3.034245587 |
| ENSRORG00000012301  | e2f7             | E2F transcription factor 7 [Source:ZFIN;Acc:ZDB-GENE-030131-3527]                                   | 6.018114024 | 2.770710646  | 0.574208973  | 3.822089756 |
| ENSRORG0000006037   | gs12a            | regulator of G protein signaling 12a [Source:ZFIN;Acc:ZDB-GENE-030131-261A]                         | 3.828309023 | 0.503764007  | 0.986824789  | 4.29365389  |
| ENSRORG00000004874  | -                | -                                                                                                   | 3.787584312 | 1.671704521  | 0.961841522  | 3.078206439 |
| ENSRORG00000005289  | -                | -                                                                                                   | 5.181060679 | 0.815466837  | -1.042806722 | 3.303271641 |
| ENSRORG00000009000  | trnm69           | tripartite motif containing 69 [Source:ZFIN;Acc:ZDB-GENE-030131-857]                                | 4.754351768 | 1.60775608   | 1.160101926  | 4.307182368 |
| ENSRORG00000015286  | mag              | myelin associated glycoprotein [Source:NCBI gene;Acc:10153466]                                      | 4.827218726 | -1.011577996 | 0.205644551  | 6.0492383   |
| ENSRORG00000012800  | mpap1            | prostate transmembrane protein, androgen induced 1 [Source:ZFIN;Acc:ZDB-GENE-040718-320]            | 4.838162448 | 0.64163733   | -0.92705202  | 3.269957098 |
| ENSRORG00000016913  | trnm110l         | transmembrane protein 110, like [Source:ZFIN;Acc:ZDB-GENE-040426-912]                               | 5.632682019 | 2.326396554  | 1.06165138   | 4.368426042 |
| ENSRORG00000011205  | adcyap1a         | adenylylate cyclase activating polypeptide 1a [Source:ZFIN;Acc:ZDB-GENE-020809-4]                   | 3.550977534 | -0.292244871 | 0.822216151  | 4.670918235 |
| ENSRORG0000000147   | NBL1             | neuroblastoma 1, DAN family BMP antagonist [Source:NCBI gene;Acc:101167028]                         | 5.601706533 | 0.763175508  | -0.788942707 | 4.050075145 |
| ENSRORG00000012745  | -                | cartonic anhydrase 1 [Source:NCBI gene;Acc:10148801]                                                | 6.469646621 | -0.382185167 | -1.387467012 | 5.464848512 |
| ENSRORG00000014099  | rab42b           | RAB42, member RAS oncogene family [Source:ZFIN;Acc:ZDB-GENE-050417-172]                             | 5.700016794 | 0.232798187  | 0.958002603  | 4.08072603  |
| ENSRORG0000004897   | stim2a           | stromal interaction molecule 2a [Source:ZFIN;Acc:ZDB-GENE-130530-765]                               | 17.02757916 | 12.21522052  | 0.898549463  | 5.711375393 |
| ENSRORG00000018142  | ezra             | ezrin a [Source:ZFIN;Acc:ZDB-GENE-050522-18]                                                        | 6.210809147 | -0.26380433  | -3.115093153 | 3.359281424 |
| ENSRORG00000015429  | dncr7            | 7-dehydrocholesterol reductase [Source:ZFIN;Acc:ZDB-GENE-030912-9]                                  | 4.448970568 | 1.655821741  | 0.860186146  | 3.653819438 |
| ENSRORG00000017346  | sc25a12          | scn carrier family 25 (aspartate/glutamate carrier), member 12 [Source:ZFIN;Acc:ZDB-GENE-031006-11] | 4.401282152 | 0.020569605  | -1.21178841  | 3.169408819 |
| ENSRORG00000090970  | lmy1 (1 of many) | lymph node metastasis 1 [Source:ZFIN;Acc:ZDB-GENE-051113-188]                                       | 3.816227968 | 1.210426884  | 4.130781341  | 4.098538279 |
| ENSRORG0000006351   | zpc123217        | zpc123217 [Source:ZFIN;Acc:ZDB-GENE-051113-188]                                                     | 4.654059516 | -0.523342922 | -0.06954213  | 5.117446771 |
| ENSRORG00000012541  | lcat             | lecithin:cholesterol acyltransferase [Source:ZFIN;Acc:ZDB-GENE-010716-3]                            | 4.12748632  | 1.927496988  | 1.276149326  | 3.476627671 |
| ENSRORG000000011023 | si.ch211-117c9.5 | si.ch211-117c9.5 [Source:ZFIN;Acc:ZDB-GENE-110408-7]                                                | 3.58996301  | -0.046028292 | 0.551199551  | 3.46655472  |
| ENSRORG0000005556   | birc2            | baculoviral IAP repeat containing 2 [Source:ZFIN;Acc:ZDB-GENE-030825-6]                             | 3.573155044 | 0.93531802   | 1.07726811   | 3.715049095 |
| ENSRORG00000010203  | -                | -                                                                                                   | 3.450562145 | 0.29241512   | -0.070110623 | 3.157614002 |
| ENSRORG00000012085  | enpp1            | ectonucleotide pyrophosphatase/phosphodiesterase 1 [Source:ZFIN;Acc:ZDB-GENE-040724-172]            | 3.70257996  | 1.305580288  | 1.086317445  | 3.481482465 |
| ENSRORG00000009198  | osbp2            | oxysterol binding protein 2 [Source:ZFIN;Acc:ZDB-GENE-091113-18]                                    | 4.008002116 | 0.141112931  | 2.150184736  | 6.017558494 |
| ENSRORG00000016520  | sgk1             | serum/glucocorticoid regulated kinase 1 [Source:ZFIN;Acc:ZDB-GENE-030131-286D]                      | 4.97222678  | 0.426744688  | -0.526733425 | 4.019233378 |
| ENSRORG00000013627  | -                | -                                                                                                   | 3.375272815 | 2.220388024  | -0.229173663 | 3.932452421 |
| ENSRORG00000017192  | phgdh            | phosphoglycerate dehydrogenase [Source:NCBI gene;Acc:10158110]                                      | 5.091161834 | 2.780491264  | 0.778615223  | 3.089772023 |
| ENSRORG0000006894   | acid1b           | acid-sensing (proton-gated) ion channel 1b [Source:ZFIN;Acc:ZDB-GENE-040513-11]                     | 5.482648022 | 1.815796043  | -0.05550071  | 3.611840242 |
| ENSRORG00000017435  | dna              | dydroprotein, alpha [Source:ZFIN;Acc:ZDB-GENE-070117-2]                                             | 6.797435781 | 2.047023019  | 0.315999161  | 5.668644234 |
| ENSRORG00000015256  | lhx1             | Lhx1 [Source:ZFIN;Acc:ZDB-GENE-030805-5]                                                            | 18.24612227 | 12.92330891  | -2.03335212  | 3.289926731 |
| ENSRORG00000008937  | si.ch73-61b6.3   | si.ch73-61b6.3 [Source:ZFIN;Acc:ZDB-GENE-091204-109]                                                | 4.264459025 | 0.866865476  | 0.098811052  | 3.496891017 |
| ENSRORG00000010258  | Hdc1             | putative hexokinase HKDC1 [Source:NCBI gene;Acc:101164634]                                          | 5.064043105 | 1.414161718  | 0.255149485  | 3.905516568 |
| ENSRORG00000009222  | scd1             | sterol C-6 desaturase [Source:NCBI gene;Acc:101160599]                                              | 4.619966738 | 2.311741019  | 1.088921795  | 3.37932035  |
| ENSRORG00000007849  | cxcl19           | interleukin-8 [Source:NCBI gene;Acc:101155802]                                                      | 5.554361816 | 0.128911126  | -0.953023621 | 4.472911703 |
| ENSRORG00000013799  | -                | -                                                                                                   | 5.32309088  | 1.645890322  | -0.08782929  | 3.589711385 |
| ENSRORG00000006713  | -                | -                                                                                                   | 3.206648488 | 0.858541739  | 1.246547995  | 3.597139505 |
| ENSRORG00000021522  | Rf00566          | small nuclear RNA SNORA35 [Source:NCBI gene;Acc:111948276]                                          | 4.349602419 | 2.49316115   | 1.180427041  | 3.037356074 |
| ENSRORG00000003449  | -                | -                                                                                                   | 4.3229328   | 1.116250717  | 0.342054433  | 3.42770836  |
| ENSRORG0000004855   | adsb             | adenylosuccinate synthase [Source:ZFIN;Acc:ZDB-GENE-050417-337]                                     | 6.046817585 | 1.613430227  | -0.205420304 | 4.22845255  |
| ENSRORG00000009912  | usp2a            | ubiquitin specific peptidase 2a [Source:ZFIN;Acc:ZDB-GENE-041212-39]                                | 3.77409566  | 1.13606953   | 2.711719388  | 5.356804459 |
| ENSRORG00000015528  | zgc109949        | riboflavin-binding protein [Source:NCBI gene;Acc:101163821]                                         | 5.586458086 | -3.528951272 | 0.70329821   | 3.07329821  |
| ENSRORG0000005935   | -                | -                                                                                                   | 6.829029028 | 1.01406671   | -2.79101453  | 3.024433517 |
| ENSRORG00000011133  | -                | -                                                                                                   | 4.094662871 | 0.2853472    | 1.045625688  | 4.855431963 |
| ENSRORG00000012461  | ptx3b            | pentraxin 3, long b [Source:ZFIN;Acc:ZDB-GENE-081104-385]                                           | 6.136739059 | -0.011381781 | -2.555195837 | 3.593410484 |
| ENSRORG00000012162  | dPYSL2           | dihydropyrimidinase like 2 [Source:HGNC Symbol;Acc:HGNC:3014]                                       | 5.430049876 | 1.94215413   | 1.527491221  | 5.01587293  |
| ENSRORG00000002064  | -                | -                                                                                                   | 4.337956413 | 1.754651278  | 0.709393997  | 3.293152938 |
| ENSRORG00000013976  | -                | -                                                                                                   | 5.714088927 | -1.236642056 | -3.710245734 | 3.24099955  |
| ENSRORG0000000909   | CLRN3            | clrn3 [Source:NCBI gene;Acc:101166090]                                                              | 3.500507489 | -0.825967736 | -1.014948064 | 3.12052324  |
| ENSRORG00000010014  | si.skey-9110.3   | si.skey-9110.3 [Source:ZFIN;Acc:ZDB-GENE-081105-124]                                                | 5.109134691 | 1.788426746  | 0.198685116  | 3.517987999 |
| ENSRORG00000017133  | rhcg             | Rh family, C glycoprotein b [Source:ZFIN;Acc:ZDB-GENE-040426-295B]                                  | 5.856858762 | -1.375052779 | -2.715001924 | 4.519398862 |
| ENSRORG00000018220  | fer16            | fer-1-like family member 6 [Source:ZFIN;Acc:ZDB-GENE-070912-312]                                    | 5.412851522 | 1.17921807   | 1.254521329  | 5.488636372 |

|                    |           |                                                                                                                                 |   |   |   |              |
|--------------------|-----------|---------------------------------------------------------------------------------------------------------------------------------|---|---|---|--------------|
| ENSRORG00000011283 | -         | -                                                                                                                               | - | - | - | -            |
| ENSRORG00000000073 | -         | -                                                                                                                               | - | - | - | -9.411495376 |
| ENSRORG00000010587 | -         | -                                                                                                                               | - | - | - | -3.354521546 |
| ENSRORG00000016443 | igf1      | insulin like growth factor 1 [Source:NCBI gene;Acc:101168167]                                                                   | - | - | - | -10.4730952  |
| ENSRORG00000006854 | sidkey-2b | sidkey-20q17.3 [Source:ZFIN;Acc:ZDB-GENE-131117-37]                                                                             | - | - | - | -0.70897326  |
| ENSRORG00000004318 | hcn2b     | Hypertension activated cyclic nucleotide-gated potassium channel 2b [Source:ZFIN;Acc:ZDB-GENE-030131-822B]                      | - | - | - | 0.082654253  |
| ENSRORG00000005919 | -         | -                                                                                                                               | - | - | - | -5.047238927 |
| ENSRORG00000005996 | fbxo32    | F-box protein 32 [Source:NCBI gene;Acc:101164672]                                                                               | - | - | - | -0.255519136 |
| ENSRORG00000010103 | -         | -                                                                                                                               | - | - | - | -4.59619071  |
| ENSRORG00000011605 | -         | uncharacterized LOC101163484 [Source:NCBI gene;Acc:101163484]                                                                   | - | - | - | -4.720054685 |
| ENSRORG00000011815 | -         | -                                                                                                                               | - | - | - | 3.823711533  |
| ENSRORG00000013494 | BMP7      | bone morphogenetic protein 7 [Source:HGNC Symbol;Acc:HGNC:1014]                                                                 | - | - | - | 0.00076633   |
| ENSRORG00000013525 | lsm14b    | LSM family member 14B [Source:ZFIN;Acc:ZDB-GENE-040426-779]                                                                     | - | - | - | -3.254503534 |
| ENSRORG00000014017 | -         | uncharacterized LOC101163484 [Source:NCBI gene;Acc:101163484]                                                                   | - | - | - | 0.828457469  |
| ENSRORG00000014516 | cyp26a1   | Oryzias latipes cytochrome P450, family 26, subfamily A, polypeptide 1 (cyp26a1), mRNA [Source:RefSeq; mRNMAccess:NM_001278843] | - | - | - | -7.956665846 |
| ENSRORG00000004976 | -         | -                                                                                                                               | - | - | - | -8.116753462 |
| ENSRORG00000010075 | grip2a    | glutamate receptor interacting protein 2a [Source:ZFIN;Acc:ZDB-GENE-081104-132]                                                 | - | - | - | 0.09594922   |
| ENSRORG00000017250 | fox2a     | forkhead box P2a [Source:ZFIN;Acc:ZDB-GENE-110407-5]                                                                            | - | - | - | 0.462821409  |
| ENSRORG00000014532 | h3z321    | SH3 domain containing 21 [Source:ZFIN;Acc:ZDB-GENE-051120-571]                                                                  | - | - | - | -1.17575811  |
| ENSRORG00000006281 | guca1c    | guanylyl cyclase-activating protein 3 [Source:NCBI gene;Acc:101172917]                                                          | - | - | - | -6.218742728 |
| ENSRORG00000013038 | calt2a    | calretinin [Source:NCBI gene;Acc:101174993]                                                                                     | - | - | - | -3.77288642  |
| ENSRORG00000000833 | -         | FRS3, lysosomal thiol reductase [Source:NCBI gene;Acc:101167441]                                                                | - | - | - | -0.651195123 |
| ENSRORG00000004312 | marveld2  | MARVEL domain containing 2b [Source:ZFIN;Acc:ZDB-GENE-050208-54]                                                                | - | - | - | 0.488662034  |
| ENSRORG00000017278 | marveld2  | MARVEL domain containing 2b [Source:ZFIN;Acc:ZDB-GENE-050208-54]                                                                | - | - | - | 0.241392343  |
| ENSRORG00000004348 | -         | -                                                                                                                               | - | - | - | -5.698423006 |
| ENSRORG00000010501 | fox2a     | forkhead box P2a [Source:ZFIN;Acc:ZDB-GENE-110407-5]                                                                            | - | - | - | -9.877742807 |
| ENSRORG00000015942 | -         | -                                                                                                                               | - | - | - | -0.370517707 |
| ENSRORG00000009106 | -         | -                                                                                                                               | - | - | - | 0.171160583  |
| ENSRORG00000017484 | erb-b2    | erb-b2 receptor tyrosine kinase-4 [Source:ZFIN;Acc:ZDB-GENE-030918-5]                                                           | - | - | - | -4.20149076  |
| ENSRORG00000016023 | erb-b4    | erb-b2 receptor tyrosine kinase-4 [Source:ZFIN;Acc:ZDB-GENE-030918-5]                                                           | - | - | - | 0.214823322  |
| ENSRORG00000015464 | -         | -                                                                                                                               | - | - | - | 0.214823322  |
| ENSRORG0000001978  | aggat9r   | 1-acylglycerol-3-phosphate O-acyltransferase 9, like [Source:ZFIN;Acc:ZDB-GENE-060531-19]                                       | - | - | - | 0.214823322  |
| ENSRORG00000014796 | -         | -                                                                                                                               | - | - | - | -1.81070643  |
| ENSRORG00000035053 | sidkey-2b | Oryzias latipes RNA binding protein 42Sd43 (LOC100049510), mRNA [Source:RefSeq; mRNMAccess:NM_001104863]                        | - | - | - | -3.05098704  |
| ENSRORG00000016779 | syta5     | synaptotagmin Va [Source:ZFIN;Acc:ZDB-GENE-040718-110]                                                                          | - | - | - | -0.511958338 |
| ENSRORG0000001667  | -         | -                                                                                                                               | - | - | - | -0.522454812 |
| ENSRORG00000009490 | GABRA2    | gamma-aminobutyric acid type A receptor alpha2 subunit [Source:HGNC Symbol;Acc:HGNC:4076]                                       | - | - | - | -5.060676974 |
| ENSRORG00000015608 | zgc-66449 | -                                                                                                                               | - | - | - | -0.609219055 |
| ENSRORG00000015383 | -         | -                                                                                                                               | - | - | - | 0.945668125  |
| ENSRORG00000012642 | lsm1      | LSM1 homolog, mRNA degradation associated [Source:NCBI gene;Acc:101156502]                                                      | - | - | - | -3.506324312 |
| ENSRORG00000014835 | -         | -                                                                                                                               | - |   |   |              |

|                     |                                                                      |                                                                                                                   |             |              |              |             |
|---------------------|----------------------------------------------------------------------|-------------------------------------------------------------------------------------------------------------------|-------------|--------------|--------------|-------------|
| ENSRORLG0000004849  | csf1ra                                                               | colony stimulating factor 1 receptor, alpha [Source:ZFIN;Acc:ZDB-GENE-001205-1]                                   | 5.035280899 | 1.5683925    | 0.01233996   | 3.479709373 |
| ENSRORLG0000001711  | cpnb4b                                                               | cytosolic polyubiquitination element binding protein 4b [Source:ZFIN;Acc:ZDB-GENE-170601-167]                     | 3.666201114 | 0.878587993  | 1.495306232  | 4.283404172 |
| ENSRORLG0000001576  | SLC25A24                                                             | solute carrier family 25 member 24 [Source:HGNC Symbol;Acc:HGNC:20862]                                            | 5.182110709 | 1.839843362  | 0.260042641  | 3.602791487 |
| ENSRORLG0000007552  | OTU domain containing protein 75 [Source:HGNC Symbol;Acc:HGNC:20718] |                                                                                                                   | 6.086657471 | 1.895637599  | -1.0819362   | 3.109565421 |
| ENSRORLG0000004933  | pkpka                                                                | phosphotransferase, platelet alpha [Source:ZFIN;Acc:ZDB-GENE-091112-29]                                           | 4.364249117 | 1.361932027  | 0.123198616  | 3.124191754 |
| ENSRORLG0000001885  | dnm3a                                                                | DNM3 domain 3 [Source:ZFIN;Acc:ZDB-GENE-040724-76]                                                                | 3.939781007 | 1.967745937  | 1.496684062  | 3.469201824 |
| ENSRORLG0000001117  | cor3                                                                 | RYR2 component 3 [Source:ZFIN;Acc:ZDB-GENE-05208-37]                                                              | 4.592445438 | 1.74767479   | 1.020977351  | 3.866323478 |
| ENSRORLG0000007890  | snpd5                                                                | sphingomyelin phosphodiesterase 5 [Source:NCBI gene;Acc:101160838]                                                | 5.021137496 | 1.919576651  | 1.256566851  | 4.358611607 |
| ENSRORLG0000001527  | -                                                                    | PTB domain-containing engulfment adapter protein 1 [Source:NCBI gene;Acc:101169696]                               | 4.767992996 | -0.002835289 | -1.603549942 | 3.167763564 |
| ENSRORLG0000001052  | -                                                                    | -                                                                                                                 | 4.836939554 | 0.10772428   | 0.472640036  | -           |
| ENSRORLG0000001073  | fatp7                                                                | fatty acid binding protein 7 [Source:NCBI gene;Acc:100144367]                                                     | 4.73632355  | -0.736513441 | -0.06058878  | 5.41279317  |
| ENSRORLG0000007984  | -                                                                    | -                                                                                                                 | 5.691989205 | -0.048254718 | -0.481079684 | 5.259654292 |
| ENSRORLG00000003124 | si:dkey-121610                                                       | si:dkey-121610.7 [Source:ZFIN;Acc:ZDB-GENE-090312-176]                                                            | 16.27244153 | 11.36663367  | 0.007508632  | 4.913786136 |
| ENSRORLG00000009676 | ppt1                                                                 | palmitoyl-protein thioesterase 7 [Source:NCBI gene;Acc:101168727]                                                 | 3.848606893 | 0.142131495  | 0.180698876  | 3.88761006  |
| ENSRORLG0000007249  | slc7a7                                                               | solute carrier family 7 member 7 [Source:NCBI gene;Acc:101169978]                                                 | 4.821142219 | 0.662043947  | 1.328947027  | 5.489532178 |
| ENSRORLG00000003164 | -                                                                    | very long-chain acyl-CoA synthetase [Source:NCBI gene;Acc:101155585]                                              | 3.871253351 | 1.429712351  | 0.882143658  | 3.324167721 |
| ENSRORLG00000018064 | ctgfa                                                                | connective tissue growth factor alpha [Source:ZFIN;Acc:ZDB-GENE-030131-102]                                       | 6.007414093 | 1.399951987  | -0.690786687 | 3.917160504 |
| ENSRORLG00000017075 | -                                                                    | guaninyl [Source:NCBI gene;Acc:101159096]                                                                         | 6.55523005  | 0.649071976  | -2.158009152 | 3.748928911 |
| ENSRORLG00000017225 | -                                                                    | bifunctional protein GIMU [Source:NCBI gene;Acc:101163376]                                                        | 16.53737039 | 13.22988379  | 9.00915513   | 4.028869584 |
| ENSRORLG00000017849 | myl12.2                                                              | myosin, light chain 12, genome duplicate 2 [Source:ZFIN;Acc:ZDB-GENE-030131-9028]                                 | 3.014185625 | 1.238442833  | 1.969490518  | 3.745718212 |
| ENSRORLG00000010490 | usp54b                                                               | ubiquitin specific peptidase 54b [Source:ZFIN;Acc:ZDB-GENE-090828-3]                                              | 4.728614751 | 1.496850811  | 0.390115892  | 3.620711882 |
| ENSRORLG00000005664 | col11a1a                                                             | collagen, type XI, alpha 1a [Source:ZFIN;Acc:ZDB-GENE-070208-167]                                                 | 4.038650747 | 0.31441222   | 0.598643252  | 3.133251685 |
| ENSRORLG00000003989 | ITGB8                                                                | integrin subunit beta 8 [Source:HGNC Symbol;Acc:HGNC:6163]                                                        | 6.45124683  | 1.991168809  | 0.163528815  | 4.62409138  |
| ENSRORLG00000015582 | mep1a.2                                                              | meprin A, alpha (PABA peptide hydrolase), tandem duplicate 2 [Source:ZFIN;Acc:ZDB-GENE-041001-208]                | 4.677476231 | -0.839820227 | -1.642529913 | 3.875252596 |
| ENSRORLG0000001338  | nesp3                                                                | nucleosome-specific protein 3 [Source:ZFIN;Acc:ZDB-GENE-050845328]                                                | 3.802545072 | 0.058045378  | 0.075667327  | 3.106551438 |
| ENSRORLG00000008806 | sk1                                                                  | salt-inducible kinase 1 [Source:ZFIN;Acc:ZDB-GENE-030131-9446]                                                    | 6.841748531 | 1.139088931  | -1.24051349  | 4.458092054 |
| ENSRORLG00000000216 | rasd4                                                                | GTP-binding protein Rhes [Source:NCBI gene;Acc:101163276]                                                         | 5.519557614 | -0.772556682 | 0.305874084  | 4.598501159 |
| ENSRORLG00000000414 | slc12a3                                                              | solute carrier family 12 (sodium/chloride transporter) member 3 [Source:ZFIN;Acc:ZDB-GENE-030131-9505]            | 6.23948583  | -0.93590482  | -3.83059484  | 3.345371567 |
| ENSRORLG00000017879 | scg5                                                                 | secretogranin V [Source:ZFIN;Acc:ZDB-GENE-040426-1687]                                                            | 3.847117884 | 1.114942308  | 0.458624954  | 3.191286372 |
| ENSRORLG0000001877  | oxgr1                                                                | opioid growth factor receptor [Source:ZFIN;Acc:ZDB-GENE-030131-377]                                               | 4.442631092 | 1.631896565  | 1.867428789  | 4.678842721 |
| ENSRORLG00000016907 | TTCC9C (1 of 4)                                                      | tetratricopeptide repeat domain 39C [Source:HGNC Symbol;Acc:HGNC:26535]                                           | 4.392818829 | 1.931468271  | 0.647468027  | 3.106953194 |
| ENSRORLG00000011505 | CPLX2                                                                | complexin 2 [Source:NCBI gene;Acc:101172505]                                                                      | 16.85093715 | 11.81900949  | -0.571331659 | 4.461063619 |
| ENSRORLG00000013351 | angpt2b                                                              | angiogenin-like 2b [Source:ZFIN;Acc:ZDB-GENE-050624-11]                                                           | 4.962646462 | 0.961101538  | 0.613494873  | 4.615614747 |
| ENSRORLG00000018238 | -                                                                    | -                                                                                                                 | 3.470870715 | -0.884296236 | -0.957179053 | 3.98847298  |
| ENSRORLG00000009846 | -                                                                    | -                                                                                                                 | 6.135793781 | 2.89132568   | 0.95947051   | 4.0023718   |
| ENSRORLG00000003679 | -                                                                    | -                                                                                                                 | 4.025913947 | 1.102163487  | 2.15611069   | 5.080245399 |
| ENSRORLG00000011982 | -                                                                    | T-box only protein 2 [Source:NCBI gene;Acc:101172071]                                                             | 4.914621663 | 2.048488017  | 0.75348514   | 3.64198788  |
| ENSRORLG00000007834 | gashb                                                                | glycine cleavage system H protein, mitochondrial [Source:NCBI gene;Acc:101156637]                                 | 4.814052954 | 1.899960264  | 0.386425851  | 3.305004417 |
| ENSRORLG00000002909 | prh2b                                                                | granin/hedge-like transcription factor 2b [Source:ZFIN;Acc:ZDB-GENE-060503-719]                                   | 4.929950541 | 0.025025599  | -0.840976883 | 4.06434596  |
| ENSRORLG00000005994 | chylestestin1                                                        | chylestestin 1 [Source:NCBI gene;Acc:101165324]                                                                   | 5.320813665 | -0.470598629 | 2.612252629  | 4.404146663 |
| ENSRORLG00000004344 | KIF5B (1 of 4)                                                       | kinesin family member 5B [Source:NCBI gene;Acc:101173989]                                                         | 3.216432176 | 0.560460594  | 0.866554787  | 3.522111539 |
| ENSRORLG00000008342 | cahz                                                                 | cardiac anhydrase [Source:ZFIN;Acc:ZDB-GENE-980526-39]                                                            | 5.77667168  | 0.303701295  | 0.470334041  | 5.943789481 |
| ENSRORLG00000011483 | slc25a48                                                             | solute carrier family 25, member 48 [Source:ZFIN;Acc:ZDB-GENE-040718-60]                                          | 5.685994281 | -1.684674119 | -2.762477874 | 4.60867481  |
| ENSRORLG00000001467 | crabp1a                                                              | cellular retinoic acid binding protein 1a [Source:ZFIN;Acc:ZDB-GENE-020320-3]                                     | 5.862821026 | 1.641403541  | 0.965959168  | 5.187851701 |
| ENSRORLG00000011217 | meif1                                                                | meis1 [Source:ZFIN;Acc:ZDB-GENE-050309-40]                                                                        | 6.693760305 | -1.47597292  | -6.793689737 | 4.076549946 |
| ENSRORLG00000015960 | vsn11a                                                               | vesin-1-like protein 1 [Source:NCBI gene;Acc:101164199]                                                           | 3.256156419 | -1.814276657 | 0.748063848  | 5.81898533  |
| ENSRORLG00000013859 | -                                                                    | N-acyl phosphatidylethanolamine phospholipase D [Source:NCBI gene;Acc:101162968]                                  | 6.170540679 | 1.951848385  | 1.143880703  | 5.363064595 |
| ENSRORLG00000012988 | ppp6                                                                 | purine nucleoside phosphorylase 6 [Source:ZFIN;Acc:ZDB-GENE-040426-1800]                                          | 5.893273942 | -2.23520329  | -3.118210652 | 5.011069251 |
| ENSRORLG00000011026 | COLEC12                                                              | collectin subfamily member 12 [Source:HGNC Symbol;Acc:HGNC:16016]                                                 | 5.145254986 | 0.172775976  | -0.111073487 | 4.861891268 |
| ENSRORLG00000041394 | zcp-92275                                                            | zcp-92275 [Source:ZFIN;Acc:ZDB-GENE-040718-356]                                                                   | 4.140913154 | -1.968802591 | 2.280719622  | 4.809189995 |
| ENSRORLG00000007662 | KIAA0895                                                             | KIAA0895 [Source:HGNC Symbol;Acc:HGNC:22208]                                                                      | 5.102737269 | 2.436565107  | 2.423284934  | 5.10851871  |
| ENSRORLG00000004766 | mical2a                                                              | microtubule associated monooxygenase, calcipoin and LIM domain containing 2a [Source:ZFIN;Acc:ZDB-GENE-110110-21] | 3.98539871  | 2.070508268  | 1.50499769   | 3.418722505 |
| ENSRORLG00000011107 | wnt7ba                                                               | Wnt-7b [Source:NCBI gene;Acc:101170723]                                                                           | 6.318805159 | 4.094127506  | 0.985895481  | 3.209051378 |
| ENSRORLG00000006247 | EIF5A                                                                | eukaryotic translation initiation factor 5A [Source:HGNC Symbol;Acc:HGNC:3300]                                    | 4.112358586 | 2.169620949  | 2.195184043  | 4.138589394 |
| ENSRORLG00000008709 | ctnbn                                                                | catenin [Source:NCBI gene;Acc:101159012]                                                                          | 5.018164794 | 1.912353254  | 0.828767953  | 3.933061071 |
| ENSRORLG00000015271 | -                                                                    | -                                                                                                                 | 18.05564895 | 10.66970204  | -0.85172552  | 6.301238471 |
| ENSRORLG00000015666 | elmo2                                                                | engulfment and cell motility 2 [Source:ZFIN;Acc:ZDB-GENE-140106-84]                                               | 3.776140446 | 2.290384911  | 2.746188118  | 4.23240196  |
| ENSRORLG00000007005 | -                                                                    | -                                                                                                                 | 5.048994392 | 11.31066096  | -0.891400137 | 3.042011923 |
| ENSRORLG00000003091 | -                                                                    | -                                                                                                                 | 4.321099323 | -0.636207489 | -0.772926052 | 4.184866612 |
| ENSRORLG00000006852 | zbtb22b                                                              | zinc finger and BTB domain containing 22b [Source:ZFIN;Acc:ZDB-GENE-010110-4]                                     | 5.972249607 | 2.958873112  | 1.196705745  | 4.213707943 |
| ENSRORLG00000014220 | KCNJ15                                                               | potassium voltage-gated channel subfamily J member 15 [Source:HGNC Symbol;Acc:HGNC:6281]                          | 5.878936368 | -2.586677298 | -3.248677769 | 5.22018351  |
| ENSRORLG00000006665 | fosb                                                                 | FBJ murine osteosarcoma viral oncogene homolog B [Source:ZFIN;Acc:ZDB-GENE-041114-181]                            | 6.625596931 | 1.093952569  | -0.597685639 | 4.934442431 |
| ENSRORLG00000002758 | gpr371a                                                              | G protein-coupled receptor 37 like 1a [Source:ZFIN;Acc:ZDB-GENE-110411-20]                                        | 3.924694414 | 0.8088825    | 0.3402056    | 3.420532991 |
| ENSRORLG00000014114 | rabgef1                                                              | RAB guanine nucleotide exchange factor (GEF) 1 [Source:ZFIN;Acc:ZDB-GENE-040426-1486]                             | 3.574857207 | 0.772409632  | 0.806545935  | 3.686396476 |

|                     |         |                                                                                                           |   |   |   |              |              |              |              |
|---------------------|---------|-----------------------------------------------------------------------------------------------------------|---|---|---|--------------|--------------|--------------|--------------|
| ENSRORLG00000003695 | -       | uncharacterized LOC101159113 [Source:NCBI gene;Acc:101159113]                                             | - | - | - | -10.06357487 | -0.572513593 | -1.49373586  | -10.98433375 |
| ENSRORLG00000004579 | -       | -                                                                                                         | - | - | - | -8.736815446 | -0.440464914 | -1.783202038 | -10.0796781  |
| ENSRORLG00000010476 | -       | -                                                                                                         | - | - | - | -10.21731668 | -0.436620299 | -0.696660179 | -10.476811   |
| ENSRORLG00000003145 | ctss    | Oryzias latipes cathepsin S (ctss), mRNA [Source:RefSeq mRNA;Acc:NM_0104687]                              | - | - | - | -10.01124136 | -0.384580303 | -1.127056126 | -10.75323324 |
| ENSRORLG00000012216 | -       | -                                                                                                         | - | - | - | -10.0139003  | -0.06958535  | -0.642723246 | -10.59025468 |
| ENSRORLG00000000429 | -       | -                                                                                                         | - | - | - | -9.742704272 | 2.264533771  | 2.739538125  | -9.271504184 |
| ENSRORLG00000000578 | -       | -                                                                                                         | - | - | - | -6.126715944 | 0.219692534  | -12.66890215 | -19.65550488 |
| ENSRORLG00000010694 | -       | -                                                                                                         | - | - | - | -5.784744004 | -0.108259803 | -2.108259803 | -4.776854152 |
| ENSRORLG00000012029 | -       | -                                                                                                         | - | - | - | -9.207263498 | -0.918827617 | 0.609178577  | -7.678727329 |
| ENSRORLG00000015622 | flvcr2a | feline leukemia virus subgroup C cellular receptor family, member 2a [Source:ZFIN;Acc:ZDB-GENE-111020-14] | - | - | - | -8.205072842 | -0.127090099 | 0.915361434  | -7.162135828 |
| ENSRORLG00000004859 | mnr41b  | retinoid A receptor-like 1b [Source:ZFIN;Acc:ZDB-GENE-040310-3]                                           | - | - | - | -5.757653948 | -1.323931214 | -1.921582948 | -6.354829094 |
| ENSRORLG00000017802 | -       | -                                                                                                         | - | - | - | -8.414775246 | 0.184762519  | -0.375611193 | -9.974659865 |
| ENSRORLG00000001480 | -       | -                                                                                                         | - | - | - | -4.526987904 | -0.58345807  | -0.458682439 | -4.401727126 |
| ENSRORLG00000017882 | -       | -                                                                                                         | - | - | - | -9.653975064 | -0.099059728 | -0.607706008 | -10.16150597 |
| ENSRORLG0000001728  | konk6   | potassium channel, subfamily K, member 6 [Source:ZFIN;Acc:ZDB-GENE-050309-213]                            | - | - | - | -3.901897819 | -0.306692945 | -1.647174241 | -4.72725524  |
| ENSRORLG00000002694 | -       | -                                                                                                         | - | - | - | -8.453807328 | -0.731862544 | -8.155213582 | -            |
| ENSRORLG00000007062 | -       | -                                                                                                         | - | - | - | -5.339411722 | 0.743581053  | 1.543505008  | -4.539002253 |
| ENSRORLG00000016420 | elov1a  | elongation of very long chain fatty acids protein 1 [Source:NCBI gene;Acc:101157810]                      | - | - | - | -4.355785979 | 0.266213274  | -2.481065226 | -7.100988473 |
| ENSRORLG00000013287 | -       | -                                                                                                         | - | - | - | -10.6434551  | -0.999915029 | -0.724821022 | -10.36788486 |
| ENSRORLG00000002880 | -       | -                                                                                                         | - | - | - | -9.199172583 | -1.571454538 | -1.248463208 | -6.382612567 |
| ENSRORLG00000012018 | nanos3  | nanos homotog 3 [Source:ZFIN;Acc:ZDB-GENE-011221-1]                                                       | - | - | - | -3.1939068   | 0.019646676  | -1.432393084 | -4.645461266 |
| ENSRORLG00000014382 | cax1    | cation/H <sup>+</sup> exchanger protein 1 [Source:ZFIN;Acc:ZDB-GENE-030131-3044]                          | - | - | - | -6.498489327 | -0.341456723 | 1.245325449  | -4.911221976 |
| ENSRORLG00000002993 | -       | -                                                                                                         | - | - | - | -10.12675423 | -0.584628097 | -0.820115521 | -8.106175666 |
| ENSRORLG00000006896 | flyp21a | cytochrome P450, family 21, subfamily A, polypeptide 2 [Source:ZFIN;Acc:ZDB-GENE-070103-6]                | - | - | - | -5.405517682 | 0.86439065   | -11.66509271 | -13.94992717 |
| ENSRORLG00000000978 | -       | -                                                                                                         | - | - | - | -3.49334377  | -0.113107898 | -0.170166758 | -4.486718914 |
| ENSRORLG00000014808 | -       | -                                                                                                         | - | - | - | -10.16907382 | 0.426655006  | 1.848282239  | -8.74695138  |
| EN                  |         |                                                                                                           |   |   |   |              |              |              |              |



|                     |                |                                                                                                               |              |              |              |             |
|---------------------|----------------|---------------------------------------------------------------------------------------------------------------|--------------|--------------|--------------|-------------|
| ENSRORG00000001941  | si.ch211-133p  | keratin, type I cytoskeletal 18 [Source:NCBI gene:Acc:101169203]                                              | 5.083710674  | -0.820399393 | -2.117504157 | 3.787090871 |
| ENSRORG0000017347   | ctsbp          | cathepsin B [Source:ZFIN;Acc.ZDB:GENE-070323-1]                                                               | 7.245990685  | -15.34165433 | -6.161384958 | 16.42676941 |
| ENSRORG0000014777   | ctsbp          | cathepsin B [Source:ZFIN;Acc.ZDB:GENE-070323-1]                                                               | 5.320272695  | 2.180165388  | 0.965025175  | 4.105626965 |
| ENSRORG0000000822   | ctpa           | cathepsin A [Source:ZFIN;Acc.ZDB:GENE-040426-2832]                                                            | 5.418448613  | -0.937278821 | -1.869921104 | 4.142763591 |
| ENSRORG00000008371  | RAB3A (1 of m) | RAB3A member RAS oncogene family [Source:HGNC Symbol;Acc.HGNC:9777]                                           | 4.549163702  | 1.131588665  | 0.222379639  | 3.641857605 |
| ENSRORG00000005050  | evx1           | even-skipped homolog 1 [Source:NCBI gene:Acc:101163914]                                                       | 5.941006278  | 0.193742706  | -1.937810306 | 3.21615381  |
| ENSRORG0000014025   | hrh2           | thyrotropin releasing hormone receptor 2 [Source:ZFIN;Acc.ZDB:GENE-050419-193]                                | 16.49967603  | 11.48159764  | 0.304306433  | 5.322856333 |
| ENSRORG0000014934   | stxbp4         | syn tactin binding protein 4 [Source:ZFIN;Acc.ZDB:GENE-110420-5]                                              | 3.770016851  | -0.037746052 | 0.220375389  | 4.028625843 |
| ENSRORG0000010744   | S100P          | S100 calcium binding protein P [Source:HGNC Symbol;Acc.HGNC:10504]                                            | 6.059095975  | 1.913854099  | -0.712197339 | 3.433492794 |
| ENSRORG00000001347  | dhfr7c         | protein NATD1 [Source:NCBI gene:Acc:101165146]                                                                | 5.503397753  | 2.186628488  | 1.25806773   | 3.425322303 |
| ENSRORG0000015795   | sidley-246g2   | sidley-246g2.3 [Source:ZFIN;Acc.ZDB:GENE-050419-100]                                                          | 3.148539157  | 1.106303874  | 1.362375592  | 3.40507753  |
| ENSRORG00000004788  | oparg1a        | peroxisome proliferator-activated receptor gamma, coactivator 1 alpha [Source:ZFIN;Acc.ZDB:GENE-080505-11]    | 5.857486152  | -1.218823043 | -3.002275632 | 4.07451885  |
| ENSRORG00000001057  | ryr1b          | ryanodine receptor 1b (skeletal) [Source:ZFIN;Acc.ZDB:GENE-070705-417]                                        | 3.060628446  | 0.30381057   | 0.91184192   | 3.66914957  |
| ENSRORG00000005076  | asef           | RAS and EF-hand domain containing [Source:ZFIN;Acc.ZDB:GENE-081105-157]                                       | 3.657441249  | 1.495200476  | 1.872756182  | 4.035482392 |
| ENSRORG00000007222  | si.ch211-212k  | cyclin B1 interacting protein 1 [Source:HGNC Symbol;Acc.HGNC:19437]                                           | 4.563558184  | 0.794161052  | 1.24473615   | 5.014619251 |
| ENSRORG000000015157 | SLS (1 of m)   | slit-like domain containing [Source:HGNC Symbol;Acc.HGNC:43311]                                               | 3.768283034  | 0.989037463  | 0.606452544  | 3.386182527 |
| ENSRORG00000002184  | inha           | inhibin, alpha [Source:ZFIN;Acc.ZDB:GENE-060503-554]                                                          | 18.66155356  | 12.94180325  | 0.466898003  | 6.187118658 |
| ENSRORG000000012622 | fatp6          | fatty acid binding protein 6, ileal (gastrotropin) [Source:ZFIN;Acc.ZDB:GENE-040625-491]                      | 3.293933031  | -1.620051972 | -1.438934161 | 3.475535673 |
| ENSRORG00000015770  | upc1           | beta-unsaturated ketone 1 [Source:NCBI gene:Acc:101160078]                                                    | 5.005558595  | 0.499344079  | -1.34876011  | 3.157932063 |
| ENSRORG000000015777 | spic           | Sp1-C transcription factor (Sp1-1/P1U 1 related) [Source:ZFIN;Acc.ZDB:GENE-040912-47]                         | 5.353442983  | -0.96107441  | -0.923710956 | 5.391238906 |
| ENSRORG00000005876  | ep8b3b         | EP8B-like 3b [Source:ZFIN;Acc.ZDB:GENE-040426-2832]                                                           | 5.300359956  | -0.429308078 | -2.594746453 | 3.130489665 |
| ENSRORG00000006407  | ep8b3b         | EP8B-like 3b [Source:ZFIN;Acc.ZDB:GENE-040426-2832]                                                           | 1.917404188  | 3.300353479  | 0.984935356  | 6.68912102  |
| ENSRORG000000010661 | si.ch73-206p6  | si.ch73-206p6.1 [Source:ZFIN;Acc.ZDB:GENE-030131-5048]                                                        | 3.614404009  | 1.138922235  | 2.091865434  | 4.567963006 |
| ENSRORG00000001617  | hent6          | Hent3.1 [Source:NCBI gene:Acc:100049437]                                                                      | 3.687564148  | -0.358403533 | 7.438772489  | 4.466272804 |
| ENSRORG00000002963  | hent6          | Hent3.1 [Source:NCBI gene:Acc:100049437]                                                                      | 3.577444912  | 1.096298605  | 1.563346692  | 4.045480075 |
| ENSRORG00000005683  | hfnna          | Fin 120 mutation factor A [Source:ZFIN;Acc.ZDB:GENE-111031-21]                                                | 3.824214602  | -6.346200877 | -1.432229364 | 7.47700962  |
| ENSRORG00000016500  | cah            | phenylalanine hydroxylase [Source:ZFIN;Acc.ZDB:GENE-031006-2]                                                 | 6.256677088  | 1.709037809  | 0.027773239  | 4.575896099 |
| ENSRORG00000006249  | PPM1L          | protein phosphatase, Mg <sup>2+</sup> /Mn <sup>2+</sup> dependent 1L [Source:HGNC Symbol;Acc.HGNC:18381]      | 4.912037744  | 2.224567003  | 1.910817068  | 4.589773978 |
| ENSRORG00000003585  | cdt3l1p1       | proximal tubules-expressed gene protein [Source:NCBI gene:Acc:101163403]                                      | 4.860851627  | -0.232960495 | -4.329935637 | 5.92256377  |
| ENSRORG00000017877  | ag2a           | protein jagged 2 [Source:NCBI gene:Acc:101163046]                                                             | 6.000840028  | 2.030739992  | 0.872930319  | 3.146589802 |
| ENSRORG000000010913 | zfp161b        | zinc finger protein 618 [Source:ZFIN;Acc.ZDB:GENE-030131-2053]                                                | 3.666618127  | 0.089089998  | 1.228099012  | 4.809101955 |
| ENSRORG00000006000  | zfp161b        | zinc finger protein 618 [Source:ZFIN;Acc.ZDB:GENE-030131-2053]                                                | 3.813803498  | 0.824156975  | 3.40214131   | 3.330345614 |
| ENSRORG00000000769  | -              | -                                                                                                             | 3.630994008  | 0.509173762  | 0.188627293  | 3.310928605 |
| ENSRORG00000017589  | ostp6          | oxysterol binding protein-like B [Source:ZFIN;Acc.ZDB:GENE-070912-206]                                        | 3.922207679  | 1.251049006  | 0.492634666  | 3.164278612 |
| ENSRORG000000012951 | ptdcl3a        | protein tyrosine phosphatase domain containing 1A [Source:ZFIN;Acc.ZDB:GENE-070112-632]                       | 3.536629221  | 0.747052865  | 0.986177851  | 3.776238987 |
| ENSRORG00000004742  | aldob          | fructose-bisphosphate aldolase B [Source:NCBI gene:Acc:10049273]                                              | 5.795577142  | 0.814688112  | -1.830087514 | 3.151286366 |
| ENSRORG00000007130  | cvp11a2        | cytochrome P450, family 11, subfamily A, polypeptide 2 [Source:ZFIN;Acc.ZDB:GENE-130911-11]                   | 4.957579322  | 3.127808106  | 1.44421076   | 3.271676363 |
| ENSRORG00000001967  | -              | -                                                                                                             | 8.206844358  | 2.446241125  | -1.744828714 | 2.48625337  |
| ENSRORG000000013056 | pappa2         | pappalysin 2 [Source:ZFIN;Acc.ZDB:GENE-070912-525]                                                            | 6.038522294  | 2.676060258  | 1.358407003  | 4.721347502 |
| ENSRORG00000009092  | cdh11          | cadherin-11 dependent kinase-like 1 (CDC2-related kinase) [Source:ZFIN;Acc.ZDB:GENE-040808-34]                | 5.384012014  | 1.890678298  | 0.277815756  | 3.173164703 |
| ENSRORG00000016621  | -              | -                                                                                                             | 4.014070601  | -0.293139994 | 2.416782764  | 6.724489891 |
| ENSRORG000000050409 | rad            | Ras-related associated with diabetes [Source:ZFIN;Acc.ZDB:GENE-030131-5607]                                   | 4.047415884  | 0.096705909  | -0.809774426 | 3.141416695 |
| ENSRORG00000004882  | ftjpa          | recombination signal binding protein for immunoglobulin kappa J region A [Source:ZFIN;Acc.ZDB:GENE-031117-11] | 3.558026951  | 0.841710685  | 0.535034911  | 3.25183515  |
| ENSRORG00000009144  | msh5           | msh5 homolog 5 [Source:ZFIN;Acc.ZDB:GENE-131127-630]                                                          | 5.854546426  | 3.988885505  | 2.669808941  | 4.535522696 |
| ENSRORG000000014711 | -              | -                                                                                                             | 16.728846511 | 13.30642203  | 1.211488521  | 4.632380358 |
| ENSRORG00000004153  | DMRTA1         | DMRT like family A1 [Source:HGNC Symbol;Acc.HGNC:19878]                                                       | 4.83367102   | -0.034872655 | 0.530768072  | 5.39979695  |
| ENSRORG00000003999  | hxb8           | lim homeobox 8b [Source:ZFIN;Acc.ZDB:GENE-081105-1531]                                                        | 5.775389857  | 0.911265876  | -0.30180799  | 4.565252034 |
| ENSRORG00000001833  | hnmppd         | heterogeneous nuclear ribonucleoprotein D [Source:ZFIN;Acc.ZDB:GENE-070424-97]                                | 3.21052992   | 0.973434447  | 1.55166695   | 3.681276801 |
| ENSRORG000000017606 | -              | -                                                                                                             | 3.694149602  | -0.705486172 | -0.852644712 | 3.547475724 |
| ENSRORG00000007030  | sfn1b          | slingshot protein phosphatase 1b [Source:ZFIN;Acc.ZDB:GENE-030131-5909]                                       | 5.288496972  | 0.068318362  | -2.008512617 | 3.212144812 |
| ENSRORG00000009208  | gad1b          | glutamate decarboxylase 1 [Source:NCBI gene:Acc:101168897]                                                    | 4.76843066   | 0.874038094  | 0.874038094  | 3.76909111  |
| ENSRORG00000002960  | arfc           | ADP-ribosylation factor-like 5C [Source:ZFIN;Acc.ZDB:GENE-040426-1868]                                        | 4.922840009  | 0.981730718  | 1.257825186  | 5.19941949  |
| ENSRORG00000002960  | arfc           | ADP-ribosylation factor-like 5C [Source:ZFIN;Acc.ZDB:GENE-040426-1868]                                        | 4.420334066  | 2.574724366  | 1.79027596   | 3.636386464 |
| ENSRORG000000122936 | prp15b         | proline rich 15-like b [Source:ZFIN;Acc.ZDB:GENE-050417-201]                                                  | 3.568146582  | 0.167051437  | -0.030009609 | 3.31570373  |
| ENSRORG00000012972  | pkfb2a         | 6-phosphofructo-2-kinase/fructose-2,6-bisphosphatase 2a [Source:ZFIN;Acc.ZDB:GENE-040426-3661]                | 3.805444613  | 1.233000116  | 1.360963815  | 3.937892501 |
| ENSRORG00000006042  | pygma          | glycogen phosphorylase, muscle form [Source:NCBI gene:Acc:101169133]                                          | 7.115227007  | 3.079098298  | -0.117102197 | 3.864893294 |
| ENSRORG000000003000 | si.ch211-239a  | ectopic viral integration site 5 [Source:HGNC Symbol;Acc.HGNC:30464]                                          | 3.659401963  | 1.274359137  | 2.621664704  | 5.007189931 |
| ENSRORG000000030316 | -              | -                                                                                                             | 7.367927126  | 3.798848539  | 0.107544714  | 3.67132432  |
| ENSRORG00000008889  | cdh17          | cadherin 17, U cadherin (liver-intestine) [Source:ZFIN;Acc.ZDB:GENE-030910-3]                                 | 4.29726792   | -0.500214587 | -1.11286718  | 3.685099981 |
| ENSRORG00000016364  | CDKL5 (1 of m) | cyclin dependent kinase like 5 [Source:HGNC Symbol;Acc.HGNC:11411]                                            | 3.26207672   | -0.706800807 | 1.156148901  | 5.122678296 |
| ENSRORG00000014773  | si.ch211-225s  | si.ch211-225s.2 [Source:ZFIN;Acc.ZDB:GENE-091204-283]                                                         | 3.376575066  | 0.736908196  | 1.805299424  | 4.4446373   |
| ENSRORG00000000897  | nfa2a          | neurofibromin 2 (merin) [Source:ZFIN;Acc.ZDB:GENE-080722-7]                                                   | 3.706971513  | 1.392895145  | 1.499496044  | 3.814057232 |

|                     |            |                                                                                                     |   |   |              |              |              |              |
|---------------------|------------|-----------------------------------------------------------------------------------------------------|---|---|--------------|--------------|--------------|--------------|
| ENSRORG0000012488   | -          | uncharacterized LOC101156019 [Source:NCBI gene:Acc:101156019]                                       | - | - | -3.421001291 | 1.193838602  | 2.991919152  | -1.622435767 |
| ENSRORG0000016956   | dnajc17    | DnaJ heat shock protein family (Hsp40) member C17 [Source:NCBI gene:Acc:101171293]                  | - | - | -3.877991568 | -0.331539898 | 3.714203628  | 0.188276788  |
| ENSRORG0000007002   | -          | -                                                                                                   | - | - | 17.53162735  | 1.9129487    | 18.51743395  | 0.935696888  |
| ENSRORG00000002314  | -          | -                                                                                                   | - | - | -5.462419399 | 0.779206     | 5.494053695  | -0.746611732 |
| ENSRORG00000005354  | palpnl1    | poly(A) binding protein, nuclear 1-like (cytoplasmic) [Source:ZFIN;Acc.ZDB:GENE-080709-5]           | - | - | -3.781245937 | -1.560367859 | 2.806663255  | 0.586300988  |
| ENSRORG00000007402  | irm6       | LSM6 homolog, U6 small nuclear RNA and mRNA degradation associated [Source:NCBI gene:Acc:101156271] | - | - | -5.440375745 | -0.669178975 | 4.255132761  | -0.515588247 |
| ENSRORG00000014961  | -          | -                                                                                                   | - | - | -0.62584674  | 2.613784867  | 2.232961011  | -0.909531468 |
| ENSRORG00000009910  | cox7c      | Cytochrome c oxidase, subunit VIIc [Source:ZFIN;Acc.ZDB:GENE-030313-8062]                           | - | - | -4.497950031 | -2.301790813 | -0.443368673 | -2.639043189 |
| ENSRORG00000000769  | tdmd17     | thioredoxin domain containing 17 [Source:NCBI gene:Acc:101163188]                                   | - | - | -3.088687754 | 1.678752451  | 5.344233678  | 0.579278972  |
| ENSRORG00000006329  | -          | -                                                                                                   | - | - | -4.266105383 | 2.225371642  | 5.379858717  | -1.1113327   |
| ENSRORG000000010961 | cdc16      | cell division cycle 16 homolog (5 cerevisiae) [Source:ZFIN;Acc.ZDB:GENE-051113-132]                 | - | - | -0.57325438  | -0.196827669 | 4.283578745  | -0.967907708 |
| ENSRORG00000007693  | -          | -                                                                                                   | - | - | -3.03337667  | 0.246764117  | 2.867486157  | -0.412169229 |
| ENSRORG00000013983  | tnem18     | transmembrane protein 18 [Source:NCBI gene:Acc:101158989]                                           | - | - | -4.419316808 | 1.194346852  | 1.564487672  | -1.048607640 |
| ENSRORG00000002783  | polr2k     | RNA polymerase I subunit K [Source:NCBI gene:Acc:101167378]                                         | - | - | -6.641961003 | 1.931506864  | 6.088748836  | -0.48394168  |
| ENSRORG00000016404  | -          | -                                                                                                   | - | - | -3.533667694 | 1.049863634  | 5.077458094  | 0.844410868  |
| ENSRORG00000007998  | ktl2       | KL12 chromatin associated homolog [Source:ZFIN;Acc.ZDB:GENE-060825-174]                             | - | - | -4.674209497 | 1.132987898  | 4.571091893  | -1.230810349 |
| ENSRORG00000007176  | rad18      | RAD18 E3 ubiquitin protein ligase [Source:ZFIN;Acc.ZDB:GENE-040426-745]                             | - | - | -3.603209153 | -0.0947212   | 4.293021597  | 0.7850188    |
| ENSRORG00000007818  | tnem192    | transmembrane protein 192 [Source:ZFIN;Acc.ZDB:GENE-040426-2254]                                    | - | - | -3.541113791 | 0.428973258  | 3.307314489  | -0.662287493 |
| ENSRORG00000012689  | mtorf3     | mitochondrial transcription termination factor 3 [Source:ZFIN;Acc.ZDB:GENE-040719-359]              | - | - | -3.799622876 | 1.168929142  | 3.999993225  | -0.9607345   |
| ENSRORG00000010947  | -          | -                                                                                                   | - | - | -4.40797009  | -0.071653883 | 6.085178245  | 1.499929731  |
| ENSRORG00000017050  | srp14      | signal recognition particle 14 [Source:NCBI gene:Acc:101172943]                                     | - | - | -3.328029892 | 1.238000393  | 2.458586633  | -2.106958004 |
| ENSRORG000000066153 | si.ch211-1 | chromosome 9 C12orf65 homolog [Source:NCBI gene:Acc:101159678]                                      | - | - | -4.077542189 | 1.084750346  | 4.87480367   | 0.28706408   |
| ENSRORG00000011747  | -          | -                                                                                                   | - | - | -5.43961892  | -0.432826254 | 5.045723641  | 0.038916889  |
| ENSRORG00000001759  | -          | -                                                                                                   | - | - | -4.29847035  | 0.319353172  | 2.629254738  | 1.943442679  |
| ENSRORG0000000847   | -          | -                                                                                                   | - | - | -3.336381329 | -1.30321577  | 0.034232416  | -1.998448489 |
| ENSRORG00000006566  | atp13a1    | ATPase 13A1 [Source:ZFIN;Acc.ZDB:GENE-040426-2804]                                                  | - | - | -3.4875757   | 1.022487766  | -1.35093453  | -            |
| ENSRORG00000007003  | surf2      | surfactant 2 [Source:NCBI gene:Acc:101158543]                                                       | - | - | -4.196015135 | 1.611247248  | 3.671160086  | -2.135617592 |

|                            |                     |                    |                                                                                                                                                    |                                                                                            |              |              |              |              |
|----------------------------|---------------------|--------------------|----------------------------------------------------------------------------------------------------------------------------------------------------|--------------------------------------------------------------------------------------------|--------------|--------------|--------------|--------------|
|                            | ENSRORG0000000862   | -                  | -                                                                                                                                                  | 3.487234383                                                                                | -0.446998253 | -0.638568148 | 3.296149535  |              |
|                            | ENSRORG00000003401  | zhaha15            | basic helix-loop-helix family, member a15<br>[Source:ZFIN;Acc:ZDB-GENE-070803-3]                                                                   | 5.164595861                                                                                | 0.851488496  | 0.243852547  | 4.557444215  |              |
|                            | ENSRORG00000017135  | LOX                | lysyl oxidase [Source:HGNC Symbol;Acc:HGNC:6664]                                                                                                   | 7.894489265                                                                                | 3.038647677  | -1.052100688 | 3.804232929  |              |
|                            | ENSRORG00000009230  | apl3a3             | adaptor-related protein complex 1, sigma 3 subunit, a<br>[Source:ZFIN;Acc:ZDB-GENE-050417-222]                                                     | 4.829129191                                                                                | -11.84670877 | -0.914053683 | 15.76594389  |              |
|                            | ENSRORG00000003859  | slc4a7             | lysine-aminotransferase 4, cytosolic isoform<br>cotransporter, member 7 [Source:ZFIN;Acc:ZDB-GENE-040407-1]                                        | 8.14537328                                                                                 | 0.521988302  | 0.862140799  | 4.154274036  |              |
|                            | ENSRORG00000009145  | atbcg2b            | ATP-binding cassette, sub-family G (WHITE), member<br>2b [Source:ZFIN;Acc:ZDB-GENE-050517-36]                                                      | 4.339088395                                                                                | -1.206829308 | -1.857534924 | 3.690667332  |              |
|                            | ENSRORG00000011364  | kctd12.1           | potassium channel tetramerization domain containing<br>12 [Source:NCBI gene;Acc:101161445]                                                         | 6.314832092                                                                                | 2.420725061  | 2.032067283  | 5.926651631  |              |
|                            | ENSRORG00000002188  | mbnl2              | keratin, type I cytoskeletal 13 [Source:NCBI<br>gene;Acc:101159648]                                                                                | 4.772018178                                                                                | 0.099134457  | -1.312798635 | 3.66570001   |              |
|                            | ENSRORG00000021780  | ND6                | NAADH dehydrogenase subunit 6 [Source:NCBI<br>gene;Acc:875436]                                                                                     | 4.058187911                                                                                | 0.252550894  | -0.709006903 | 3.097084894  |              |
|                            | ENSRORG00000005419  | mbnl2              | muscleblind-like splicing regulator 2<br>[Source:ZFIN;Acc:ZDB-GENE-030313-9582]                                                                    | 4.845858249                                                                                | 1.302772434  | 0.413792925  | 3.957362823  |              |
|                            | ENSRORG00000001544  | -                  | -                                                                                                                                                  | 4.262076501                                                                                | 1.148768118  | 0.573263411  | 3.687056346  |              |
|                            | ENSRORG00000010480  | syn11c1            | cytochrome P450, family 11, subfamily C, polypeptide 1<br>[Source:ZFIN;Acc:ZDB-GENE-070828-1]                                                      | 19.6281402                                                                                 | 10.50162823  | -0.897668316 | 8.229315388  |              |
|                            | ENSRORG00000001966  | -                  | -                                                                                                                                                  | 15.73800805                                                                                | 11.97938398  | 0.221908813  | 3.980544227  |              |
|                            | ENSRORG00000001355  | -                  | -                                                                                                                                                  | 4.713809708                                                                                | 1.815474585  | 0.93332189   | 3.832151777  |              |
|                            | ENSRORG00000005667  | -                  | -                                                                                                                                                  | 5.455333591                                                                                | 2.542395447  | 0.835456998  | 3.748990301  |              |
|                            | ENSRORG000000014951 | -                  | -                                                                                                                                                  | 3.858984769                                                                                | 0.439661216  | 2.319510658  | 5.640228831  |              |
|                            | ENSRORG00000005623  | czcd1.1            | CUB and zona pellucida-like domains 1, tandem<br>duplicate 1 [Source:ZFIN;Acc:ZDB-GENE-131122-16]                                                  | 4.097871618                                                                                | -13.22300918 | -1.631488534 | 15.68992046  |              |
|                            | ENSRORG00000001933  | tex11              | testis expressed 11 [Source:ZFIN;Acc:ZDB-GENE-140415-11]                                                                                           | 5.187885818                                                                                | 1.612997714  | 2.689077048  | 6.26444928   |              |
|                            | ENSRORG00000001276  | foxj1              | Oryzias latipes forkhead box j1 [foxj1] mRNA<br>[Source:RefSeq;Acc:NM_001160461]                                                                   | 16.5506222                                                                                 | 11.65322576  | 2.075103676  | 6.972969259  |              |
|                            | ENSRORG00000007473  | slc2a1b            | solute carrier family 2 (facilitated glucose transporter),<br>member 1b [Source:ZFIN;Acc:ZDB-GENE-090915-11]                                       | 4.699783725                                                                                | 1.011046403  | 0.011113444  | 3.520336524  |              |
|                            | ENSRORG00000002518  | ctf1               | cathenin 1 [Source:NCBI gene;Acc:101171789]                                                                                                        | 7.806815748                                                                                | -4.875599867 | -6.800213975 | 5.882629206  |              |
|                            | ENSRORG00000009509  | sema3e             | sema domain, immunoglobulin domain (Ig), short basic<br>domain, secreted (semaphorin 3E)<br>[Source:ZFIN;Acc:ZDB-GENE-030313-7864]                 | 5.835118334                                                                                | 2.613054531  | 0.669905018  | 3.892451114  |              |
|                            | ENSRORG000000015025 | -                  | -                                                                                                                                                  | 3.485634941                                                                                | -0.243537694 | -0.363523073 | 3.36594544   |              |
|                            | ENSRORG00000007539  | pad2 (1 of 2)      | peptidyl arginine deiminase, type II<br>[Source:ZFIN;Acc:ZDB-GENE-031116-67]                                                                       | 3.081228956                                                                                | -0.941421157 | -0.028534727 | 3.994597902  |              |
|                            | ENSRORG00000001216  | uhdk8a             | ketch domain containing 8A [Source:ZFIN;Acc:ZDB-GENE-120810-3]                                                                                     | 5.292763849                                                                                | 1.812343408  | 0.678789488  | 4.158782756  |              |
|                            | ENSRORG000000010844 | lam83b             | family with sequence similarity 83, member Bb<br>[Source:ZFIN;Acc:ZDB-GENE-041114-194]                                                             | 5.027233355                                                                                | -0.140783556 | -0.343590118 | 4.824911477  |              |
|                            | ENSRORG000000012534 | lmtosp2b           | leucostemone multiple tissue open 2b [Source:ZFIN;Acc:ZDB-GENE-110411-43]                                                                          | 7.015855967                                                                                | 1.631236111  | -0.492288901 | 4.892819163  |              |
|                            | ENSRORG00000003219  | -                  | -                                                                                                                                                  | 4.793938434                                                                                | 1.866896868  | 2.772614774  | 5.700174925  |              |
|                            | ENSRORG000000017688 | rpl11              | low density lipoprotein receptor-related protein 11<br>[Source:ZFIN;Acc:ZDB-GENE-030313-7847]                                                      | 3.397187434                                                                                | 0.151349411  | 1.055467034  | 4.354870364  |              |
|                            | ENSRORG00000009344  | phyh               | phytanoyl-CoA 2-hydroxylase [Source:ZFIN;Acc:ZDB-GENE-050417-361]                                                                                  | 4.654069585                                                                                | 1.199669879  | -0.211640732 | 3.24244013   |              |
|                            | ENSRORG00000003194  | skp2a              | SKP2, serine/threonine kinase 2 [Source:NCBI<br>gene;Acc:101162289]                                                                                | 3.878808172                                                                                | -0.206395088 | -1.088087353 | 3.004802083  |              |
|                            | ENSRORG000000009494 | homedox            | homeobox protein MSX-2 [Source:NCBI<br>gene;Acc:10089217]                                                                                          | 6.404834445                                                                                | 1.598127372  | -1.697946293 | 3.109244883  |              |
|                            | ENSRORG000000050591 | dwdc1a             | DX domain containing 1a [Source:ZFIN;Acc:ZDB-GENE-030921-2]                                                                                        | 4.545628933                                                                                | 2.00085875   | 0.93255712   | 3.477813413  |              |
|                            | ENSRORG000000013216 | tnk2a              | tyrosine kinase, non-receptor, 2a [Source:ZFIN;Acc:ZDB-GENE-091118-85]                                                                             | 3.684709369                                                                                | 0.051452161  | 2.090104255  | 5.123846228  |              |
|                            | ENSRORG000000005853 | rth8a              | retinol dehydrogenase 8 [Source:NCBI<br>gene;Acc:101157066]                                                                                        | 5.366647554                                                                                | 0.073276841  | 3.762479309  | 3.628479309  |              |
|                            | ENSRORG000000014356 | si.ch211-1602      | E2F transcription factor 2 [Source:HGNC<br>Symbol;Acc:HGNC:3114]                                                                                   | 4.547606297                                                                                | 0.559448472  | 1.219550186  | 5.208187682  |              |
|                            | ENSRORG000000091928 | slc9a3.2           | solute carrier family 9, subfamily A (NHE3, cation proton<br>antiporter 3), member 3, tandem duplicate 2<br>[Source:ZFIN;Acc:ZDB-GENE-070112-2112] | 4.934440409                                                                                | -1.259139378 | -2.99697533  | 3.197090733  |              |
|                            | ENSRORG00000006346  | ttf7               | tubulin tyrosine ligase-like family, member 7<br>[Source:ZFIN;Acc:ZDB-GENE-070112-2112]                                                            | 5.729193371                                                                                | 0.973814362  | 0.906632731  | 5.662490206  |              |
|                            | ENSRORG000000014098 | -                  | -                                                                                                                                                  | 3.559643463                                                                                | 1.500809604  | 1.756912751  | 3.818231728  |              |
|                            | ENSRORG00000007198  | kyd6               | FXYD domain-containing ion transport regulator 6<br>[Source:NCBI gene;Acc:101162288]                                                               | 5.290034332                                                                                | -0.41630157  | 1.727119756  | 4.74394054   |              |
|                            | ENSRORG000000017040 | cerse6             | ceramide synthase 6 [Source:NCBI gene;Acc:101156449]                                                                                               | 4.385291128                                                                                | 1.780343995  | 1.74258883   | 4.848089007  |              |
|                            | ENSRORG00000007145  | sg15               | ISG15 ubiquitin-like modifier [Source:ZFIN;Acc:ZDB-GENE-021211-1]                                                                                  | 6.753144701                                                                                | 0.474437172  | -2.94344093  | 3.335751679  |              |
|                            | ENSRORG000000018061 | ankrd10b           | ankyrin repeat domain 10b [Source:ZFIN;Acc:ZDB-GENE-061013-49]                                                                                     | 4.039189829                                                                                | 1.62161377   | 0.621137824  | 3.039198755  |              |
|                            | ENSRORG00000003469  | -                  | -                                                                                                                                                  | 5.44184044                                                                                 | 1.488216969  | 0.116675105  | 4.070785927  |              |
|                            | ENSRORG00000004499  | rab38b             | ras-related protein Rab-38 [Source:NCBI<br>gene;Acc:101171270]                                                                                     | 4.80494061                                                                                 | 3.17703345   | 1.426739663  | 3.055132024  |              |
|                            | ENSRORG00000002198  | rhl2.1             | coagulation factor 1 (thrombin) receptor-like 1, tandem<br>duplicate 2 [Source:ZFIN;Acc:ZDB-GENE-070615-24]                                        | 3.689016458                                                                                | 1.030846237  | 1.044128614  | 3.699882141  |              |
| HMO VS WIT0<br>Hmt VS WIT1 | 51                  | ENSRORG00000005352 | entpd3                                                                                                                                             | ectonucleoside triphosphate diphosphohydrolase 3<br>[Source:ZFIN;Acc:ZDB-GENE-030313-6186] | -1.242679647 | 3.379546703  | 4.474189910  | -0.147553406 |
|                            | ENSRORG00000021831  | RF00088            | small nuclear RNA, SNORD30 [Source:NCBI<br>gene;Acc:111946387]                                                                                     | -13.07658181                                                                               | 3.877014117  | 16.73423106  | -0.21887556  |              |
|                            | ENSRORG00000003088  | -                  | -                                                                                                                                                  | -1.782346886                                                                               | 6.177407831  | 5.260231237  | -2.699035064 |              |
|                            | ENSRORG000000010931 | igs13              | regulator of G-protein signaling 21 [Source:NCBI<br>gene;Acc:101157397]                                                                            | -11.87924628                                                                               | 4.383144949  | 1.718154949  | 0.919649957  |              |
|                            | ENSRORG000000011894 | -                  | -                                                                                                                                                  | -16.02235719                                                                               | 3.206633531  | 16.28443772  | -2.94406294  |              |
|                            | ENSRORG00000000877  | -                  | -                                                                                                                                                  | 1.296137302                                                                                | 4.020825217  | 3.611503924  | 0.887300516  |              |
|                            | ENSRORG000000021349 | RF00581            | small nuclear SNORD12/SNORD106 [Source:NCBI<br>gene;Acc:111946100]                                                                                 | 0                                                                                          | 15.85143234  | 15.68362107  | -0.167338814 |              |
|                            | ENSRORG00000006320  | CASP1              | caspace 1 [Source:HGNC Symbol;Acc:HGNC:1499]                                                                                                       | 2.462170178                                                                                | 3.063665442  | 3.509955637  | 2.908945171  |              |
|                            | ENSRORG00000001173  | -                  | -                                                                                                                                                  | 1.753433532                                                                                | 6.964474839  | 6.954008949  | 1.743537322  |              |
|                            | ENSRORG000000021768 | ATP8               | ATP synthase F0 subunit 8 [Source:NCBI<br>gene;Acc:805490]                                                                                         | -1.052353917                                                                               | 4.643563323  | 4.495509189  | -1.199920665 |              |
|                            | ENSRORG000000017072 | -                  | -                                                                                                                                                  | -14.84577964                                                                               | 4.858686716  | 17.23187412  | -4.269824708 |              |
|                            | ENSRORG000000021773 | -                  | -                                                                                                                                                  | -0.977761891                                                                               | 3.104967073  | 3.980601143  | -0.101647504 |              |
|                            | ENSRORG000000014848 | codc59             | coiled-coil domain containing 59 [Source:NCBI<br>gene;Acc:101167836]                                                                               | -16.54662863                                                                               | 3.555423959  | 16.59110578  | -3.510544622 |              |
|                            | ENSRORG00000007446  | lrcc61             | leucine rich repeat containing 61 [Source:ZFIN;Acc:ZDB-GENE-060616-245]                                                                            | -16.39836761                                                                               | 3.743613292  | 17.84795663  | -2.295359023 |              |
|                            | ENSRORG000000013307 | -                  | -                                                                                                                                                  | -0.929430527                                                                               | 3.29038636   | 4.55024922   | 0.331369448  |              |
|                            | ENSRORG00000000892  | -                  | -                                                                                                                                                  | -2.958372497                                                                               | 3.898290217  | 5.930064369  | -0.926109597 |              |

|  |                     |           |                                                                                                 |              |              |             |              |
|--|---------------------|-----------|-------------------------------------------------------------------------------------------------|--------------|--------------|-------------|--------------|
|  | ENSRORG000000003251 | cop2      | COP9 signalosome subunit 2 [Source:ZFIN;Acc:ZDB-GENE-040625-15]                                 | -6.387802188 | 2.366900522  | 8.973516339 | 0.712998614  |
|  | ENSRORG00000005638  | ckc20     | Oryzias latipes cell division cycle 20 [cdc20], mRNA<br>[Source:RefSeq;Acc:NM_001160429]        | -5.643613078 | 0.078390757  | 4.544630463 | -1.17689416  |
|  | ENSRORG000000016447 | ckc20     | Oryzias latipes cell division cycle 20 [cdc20], mRNA<br>[Source:RefSeq;Acc:NM_001160429]        | -4.277219337 | -0.013546088 | 3.869433311 | -0.393754729 |
|  | ENSRORG000000017696 | -         | -                                                                                               | -4.172102505 | 0.135239884  | 4.598951358 | 0.343323747  |
|  | ENSRORG000000013659 | -         | -                                                                                               | -4.363864584 | 0.396699651  | 1.834092795 | -2.925838276 |
|  | ENSRORG000000014689 | -         | -                                                                                               | -3.194680959 | -0.354929344 | 1.499824168 | -1.339988998 |
|  | ENSRORG000000012401 | fetub     | fetuin-B, like [Source:NCBI gene;Acc:101158597]                                                 | -5.190089553 | -2.715881636 | 0.585882228 | -1.886582079 |
|  | ENSRORG000000014395 | -         | -                                                                                               | -5.780202634 | 0.546196644  | 6.983986418 | 0.63997958   |
|  | ENSRORG000000013917 | top11     | DNA topoisomerase I like [Source:ZFIN;Acc:ZDB-GENE-06016-217]                                   | -3.110262018 | 0.634501922  | 3.004037755 | -0.740241172 |
|  | ENSRORG000000007720 | kyt1      | kyt-like poly(ADP-ribose) polymerase 1 [Source:ZFIN;Acc:ZDB-GENE-120504-2]                      | -3.122871263 | -0.60405941  | 2.852809832 | 0.334817724  |
|  | ENSRORG000000015890 | atp6v1e1  | V-type proton ATPase subunit E 1 [Source:NCBI<br>gene;Acc:101155846]                            | -4.556435834 | -0.356399597 | 3.25634304  | -0.943208395 |
|  | ENSRORG000000012417 | -         | -                                                                                               | -4.02145638  | -0.327597726 | 1.733619621 | -1.959795415 |
|  | ENSRORG000000003595 | sidkey-6i | polyamine-modulated factor 1 [Source:NCBI<br>gene;Acc:101157951]                                | -3.369578671 | 1.655239818  | 6.67678546  | 1.652417119  |
|  | ENSRORG000000009466 | -         | -                                                                                               | -15.91312378 | 2.213178008  | 15.57018154 | -2.615629644 |
|  | ENSRORG000000009410 | rab5f     | RAB5 interacting factor [Source:ZFIN;Acc:ZDB-GENE-030313-5928]                                  | -3.269578671 | 1.991118447  | 18.34438417 | -1.021667583 |
|  | ENSRORG000000006871 | myop3     | myosin binding protein C, cardiac [Source:ZFIN;Acc:ZDB-GENE-070112-2362]                        | -4.683171147 | -1.043484356 | 5.08718675  | -3.004048017 |
|  | ENSRORG00000000928  | mrips18a  | mitochondrial ribosomal protein S18A<br>[Source:ZFIN;Acc:ZDB-GENE-041210-109]                   | -4.358165368 | 1.089967616  | 5.50236954  | 0.055620227  |
|  | ENSRORG00000009878  | -         | -                                                                                               | -3.336503804 | -0.117975964 | 2.840308074 | -0.377692381 |
|  | ENSRORG000000011157 | -         | -                                                                                               | -3.124218139 | -0.211939059 | 1.986731635 | -0.925062726 |
|  | ENSRORG000000017105 | -         | -                                                                                               | -3.87583639  | -0.629597257 | 6.104323067 | -2.202530587 |
|  | ENSRORG000000018095 | -         | -                                                                                               | -4.097715184 | -0.019964941 | 2.396134444 | -1.681141851 |
|  | ENSRORG000000017096 | -         | -                                                                                               | -3.078541521 | -0.979563387 | 6.150307317 | 4.051814746  |
|  | ENSRORG000000030203 | sich73-3b | sich73-3b15.2 [Source:ZFIN;Acc:ZDB-GENE-090313-161]                                             | -3.063329784 | -1.196334331 | 0.097637227 | -1.768872546 |
|  | ENSRORG000000013085 | dgr6      | DGeorge syndrome critical region gene 6<br>[Source:ZFIN;Acc:ZDB-GENE-040912-125]                | -6.618017847 | 2.472887565  | 8.036283882 | -0.852234352 |
|  | ENSRORG000000005512 | -         | -                                                                                               | -15.66588789 | 0.486610083  | 16.98379591 | 0.831987963  |
|  | ENSRORG000000015813 | -         | -                                                                                               | -4.708459167 | 1.187219685  | 6.339671587 | 0.444498611  |
|  | ENSRORG000000006615 | cnmb2     | cyclin B2 [Source:ZFIN;Acc:ZDB-GENE-030429-12]                                                  | -5.151086309 | -0.158621867 | 3.192614207 | -1.79996112  |
|  | ENSRORG000000014480 | clnna4    | clnna4 [Source:ZFIN;Acc:ZDB-GENE-030313-4663]                                                   | -3.379045445 | -0.054697324 | 0.586192867 | -2.33967992  |
|  | ENSRORG000000014480 | clnna4    | clnna4 [Source:ZFIN;Acc:ZDB-GENE-030313-4663]                                                   | -3.379045445 | -0.054697324 | 0.586192867 | -2.33967992  |
|  | ENSRORG000000013510 | polr2k    | polymyrase (PAA) II (DNA directed) polypeptide G-like<br>[Source:ZFIN;Acc:ZDB-GENE-030313-2898] | -4.165346944 | 1.526296446  | 6.770132937 | 1.078973943  |
|  | ENSRORG000000004968 | hpf1      | histone H4K9 acetyltransferase 1 [Source:ZFIN;Acc:ZDB-GENE-030313-740]                          | -3.023176391 | 0.456789752  | 3.925628495 | 0.446151348  |
|  | ENSRORG000000013500 | mrp42     | mitochondrial ribosomal protein L42<br>[Source:ZFIN;Acc:ZDB-GENE-101014-1]                      | -7.249409094 | -0.728804617 | 5.830011071 | -0.690100055 |
|  | ENSRORG000000011310 | -         | -                                                                                               | -3.892837305 | -0.203881848 | 2.00314891  | -1.685321573 |
|  | ENSRORG00000005927  | gzm1      | glutathione S-transferase Mu 3 [Source:NCBI<br>gene;Acc:101157367]                              | -3.196017851 | 2.406141404  | 4.088312071 | -1.513586077 |
|  | ENSRORG000000008551 | znhit2    | zinc finger, HIT-type containing 2 [Source:ZFIN;Acc:ZDB-GENE-061013-461]                        | -5.921687441 | 1.1229535    |             |              |

|  |            |                     |                    |                                                                                                                 |              |              |             |              |
|--|------------|---------------------|--------------------|-----------------------------------------------------------------------------------------------------------------|--------------|--------------|-------------|--------------|
|  |            | ENSRORG0000015481   | -                  | -                                                                                                               | -0.806342283 | 3.547071895  | 4.795629699 | 0.442699995  |
|  |            | ENSRORG0000021776   | -                  | -                                                                                                               | -2.154949255 | 4.260665844  | 6.619866314 | 0.204739397  |
|  |            | ENSRORG0000009905   | -                  | -                                                                                                               | -1.388232689 | 4.403817035  | 4.892224497 | -0.899340079 |
|  |            | ENSRORG0000016233   | calcyp             | calcyclin binding protein [Source:ZFIN;Acc:ZDB-GENE-040426-2579]                                                | -5.235665682 | 3.021109765  | 5.29597897  | -2.960312682 |
|  |            | ENSRORG00000030152  | -                  | -                                                                                                               | -12.21090569 | 3.611493887  | 17.13034317 | 1.308622375  |
|  |            | ENSRORG0000003994   | -                  | -                                                                                                               | 1.444821952  | 3.055818773  | 3.449923764 | 1.843348634  |
|  |            | ENSRORG00000015699  | -                  | -                                                                                                               | -1.061322839 | 4.188981955  | 3.07223312  | -2.177587006 |
|  |            | ENSRORG00000011148  | -                  | -                                                                                                               | 0.628339602  | 3.555682248  | 4.79200102  | 1.865144269  |
|  |            | ENSRORG00000009944  | -                  | -                                                                                                               | -0.606954623 | 4.026796607  | 5.359997393 | 0.726723387  |
|  |            | ENSRORG00000003863  | -                  | -                                                                                                               | -4.073374847 | 4.018943078  | 8.796888995 | 0.704067542  |
|  |            | ENSRORG00000021048  | -                  | -                                                                                                               | 0            | 18.12980169  | 15.913046   | -2.216283219 |
|  |            | ENSRORG00000009313  | GTF3C6             | general transcription factor IIC subunit 6 [Source:HGNC Symbol;Acc:HGNC:20872]                                  | -14.67936134 | 4.152949785  | 17.82787303 | -1.003948122 |
|  |            | ENSRORG00000021751  | -                  | -                                                                                                               | 1.785479871  | 3.750792787  | 5.887853962 | 2.847186967  |
|  |            | ENSRORG00000003933  | -                  | -                                                                                                               | 1.204092243  | 3.373452314  | 3.788256862 | 1.619392108  |
|  |            | ENSRORG00000017057  | spc25              | potassium voltage-gated channel interacting protein 1 [Source:NCBI gene:Acc:101160987]                          | -4.60626571  | 3.838688423  | 8.95398504  | 0.50893376   |
|  |            | ENSRORG00000006512  | -                  | -                                                                                                               | -3.089447523 | 3.581472081  | 6.94478606  | 0.274346095  |
|  |            | ENSRORG00000000001  | -                  | -                                                                                                               | -2.271823582 | 4.156445042  | 6.625664582 | 0.199622849  |
|  |            | ENSRORG00000009806  | -                  | -                                                                                                               | -13.36384597 | 4.31958364   | 16.72555132 | -0.953880177 |
|  |            | ENSRORG00000015296  | -                  | -                                                                                                               | 13.3328212   | 15.72530261  | 4.486098424 | 2.094083823  |
|  |            | ENSRORG00000007415  | kfbp14             | FKBP5 binding protein 14 [Source:NCBI gene:Acc:101156431]                                                       | 0.259829669  | 3.220825748  | 3.63733354  | 0.676821572  |
|  |            | ENSRORG00000002132  | suft6b1            | sulfotransferase family, cytosolic, 6b, member 1 [Source:ZFIN;Acc:ZDB-GENE-050417-228]                          | 1.521595074  | 3.865857132  | 3.245770728 | 9.01995652   |
|  |            | ENSRORG00000006798  | orla-uba           | major histocompatibility complex class I-related gene protein-like [Source:NCBI gene:Acc:101168971]             | -1.564177067 | 3.321869988  | 6.392736988 | 1.610348441  |
|  |            | ENSRORG00000001390  | unm_hu7912         | un-named hu7912 [Source:ZFIN;Acc:ZDB-GENE-120727-20]                                                            | -3.419694192 | 3.014230318  | 6.202383788 | -0.231051001 |
|  |            | ENSRORG00000008147  | ccdc115            | coiled-coil domain containing 115 [Source:ZFIN;Acc:ZDB-GENE-050227-20]                                          | 0.76202122   | 3.714469241  | 19.04628249 | -0.889717879 |
|  |            | ENSRORG00000001196  | -                  | -                                                                                                               | 0.874206987  | 5.386073913  | 4.547420882 | 0.036043151  |
|  |            | ENSRORG00000015074  | srn1               | sulfiredoxin 1 homolog (S. cerevisiae) [Source:NCBI gene:Acc:101168971]                                         | -15.40635185 | 3.23979197   | 16.51479186 | -2.130862051 |
|  |            | ENSRORG000000021477 | RF00604            | small nucleolar RNA SNORD88 [Source:NCBI gene:Acc:11947849]                                                     | -11.78991261 | 4.060214326  | 18.09306758 | 2.243429445  |
|  |            | ENSRORG00000000970  | -                  | -                                                                                                               | -0.734138443 | 4.141615702  | 5.487999347 | 0.61273753   |
|  |            | ENSRORG00000003349  | spc82              | sperm flagellar 2 [Source:ZFIN;Acc:ZDB-GENE-060526-47]                                                          | 1.901034479  | 4.188958099  | 3.93597866  | 1.64853963   |
|  |            | ENSRORG00000000884  | -                  | -                                                                                                               | -4.432402165 | 5.468364311  | 8.54434311  | -1.355947069 |
|  |            | ENSRORG0000001626   | cd79b              | CD79b molecule [Source:NCBI gene:Acc:101171204]                                                                 | 0.664873775  | 4.495232024  | 3.05430456  | -0.775568623 |
|  |            | ENSRORG00000006772  | orla-uaa           | major histocompatibility complex class I-related gene protein-like [Source:NCBI gene:Acc:101167181]             | -1.918299205 | 3.269770386  | 7.019903831 | 2.232319062  |
|  |            | ENSRORG00000011711  | -                  | -                                                                                                               | 1.192752806  | 3.411875709  | 3.89765572  | 1.679018328  |
|  |            | ENSRORG00000006453  | -                  | -                                                                                                               | 0.028539518  | 4.174879476  | 4.109223362 | -0.036632148 |
|  |            | ENSRORG00000021299  | RF00211            | small nucleolar RNA SNORD35 [Source:NCBI gene:Acc:11947849]                                                     | -11.31474184 | 4.630899991  | 16.10720911 | 0.20668996   |
|  | Hmt VS Hmo | 392                 | ENSRORG00000012419 | -                                                                                                               | -0.512654554 | 1.747292241  | 6.18996396  | 3.910145991  |
|  | Hmt VS WTT |                     | ENSRORG00000021702 | RF00009                                                                                                         | 0.909046702  | 2.051825462  | 6.073917982 | 4.831824244  |
|  |            | ENSRORG00000015179  | -                  | -                                                                                                               | 4.22662672   | -0.04827848  | 7.93419557  | 12.20956663  |
|  |            | ENSRORG00000004816  | pcr25              | G protein-coupled receptor 25 [Source:ZFIN;Acc:ZDB-GENE-141216-12]                                              | 13.80739331  | 9.427291899  | 3.873241558 | 7.72679897   |
|  |            | ENSRORG00000009290  | adama8a            | ADAM metallopeptidase domain 8a [Source:ZFIN;Acc:ZDB-GENE-030616-622]                                           | 2.07832775   | 1.422564727  | 3.972729449 | 4.628976954  |
|  |            | ENSRORG00000010366  | -                  | -                                                                                                               | 0.527604863  | 1.93054682   | 5.032492788 | 3.630033558  |
|  |            | ENSRORG00000004877  | -                  | -                                                                                                               | 3.628686887  | 2.752265144  | 3.378099766 | 4.254836618  |
|  |            | ENSRORG00000013010  | -                  | -                                                                                                               | 14.24920606  | 0            | 5.282249312 | 15.53194684  |
|  |            | ENSRORG00000011998  | -                  | -                                                                                                               | 0            | 13.4854545   | 17.5689976  | 0.084006253  |
|  |            | ENSRORG00000008933  | gpat4              | glycerol-3-phosphate acyltransferase 4 [Source:ZFIN;Acc:ZDB-GENE-060421-5102]                                   | 9.148146059  | 11.83590829  | 6.789182009 | 4.10182855   |
|  |            | ENSRORG00000013996  | -                  | -                                                                                                               | -0.557052574 | 2.436576954  | 7.01656982  | 0.023412354  |
|  |            | ENSRORG00000021715  | -                  | -                                                                                                               | 6.37172808   | 5.016762925  | 3.5679351   | 4.933768307  |
|  |            | ENSRORG000000018224 | -                  | -                                                                                                               | -11.57894343 | 0.709664706  | 17.08147137 | 4.373558874  |
|  |            | ENSRORG00000016495  | agb12              | ATP/GTP binding protein-like 2 [Source:ZFIN;Acc:ZDB-GENE-070719-6]                                              | 2.893506677  | -0.474237298 | 3.111021432 | 6.479324136  |
|  |            | ENSRORG00000006011  | sx2tpb             | synovial sarcoma X breakpoint 2 interacting protein b [Source:ZFIN;Acc:ZDB-GENE-050208-601]                     | 12.32661206  | 12.58738374  | 5.177099051 | 4.916792792  |
|  |            | ENSRORG00000009619  | slc2a11l           | solute carrier family 2 (facilitated glucose transporter), member 11-like [Source:ZFIN;Acc:ZDB-GENE-061215-118] | 12.53699751  | 9.988485877  | 4.039518703 | 6.58849374   |
|  |            | ENSRORG00000018005  | -                  | -                                                                                                               | -10.8541256  | -10.85408918 | 17.22527296 | 17.22527476  |
|  |            | ENSRORG00000011276  | -                  | -                                                                                                               | 0.063635329  | 4.043127334  | 4.006098009 | 3.667083962  |
|  |            | ENSRORG000000021667 | -                  | -                                                                                                               | 2.772094905  | 1.904247876  | 3.584267326 | 4.451829641  |
|  |            | ENSRORG00000008793  | -                  | -                                                                                                               | 2.122780435  | -0.647742961 | 5.739143971 | 8.510149393  |
|  |            | ENSRORG00000020394  | -                  | -                                                                                                               | 3.710128764  | 1.145455472  | 4.12196445  | 6.687126581  |
|  |            | ENSRORG00000016632  | -                  | -                                                                                                               | 11.3011532   | 10.38786655  | 5.364104316 | 6.277496878  |
|  |            | ENSRORG00000004631  | col14a1a           | collagen, type XIV, alpha 1a [Source:ZFIN;Acc:ZDB-GENE-030131-9889]                                             | 2.433052175  | 2.667351958  | 6.67349635  | 3.65877244   |
|  |            | ENSRORG00000012774  | wdr34              | WD repeat domain 34 [Source:NCBI gene:Acc:101171788]                                                            | 1.378601347  | -0.356267149 | 3.289776908 | 5.025130434  |
|  |            | ENSRORG00000016184  | s-dkey-33m11       | s-dkey-33m11.7 [Source:ZFIN;Acc:ZDB-GENE-141218-115]                                                            | 11.27495465  | 9.620568083  | 4.340158036 | 5.995017365  |
|  |            | ENSRORG00000021588  | -                  | -                                                                                                               | 14.50988627  | 12.03865497  | 3.368410222 | 18.89809596  |
|  |            | ENSRORG00000004573  | PLC21              | phospholipase C zeta 1 [Source:HGNC Symbol;Acc:HGNC:19218]                                                      | 15.25729797  | 11.22037228  | 4.753498106 | 8.790851252  |
|  |            | ENSRORG00000007334  | -                  | -                                                                                                               | 11.79292871  | 0            | 6.012420354 | 17.8551777   |
|  |            | ENSRORG00000002868  | -                  | -                                                                                                               | 1.76971159   | -0.898898076 | 8.217185444 | 8.395130234  |
|  |            | ENSRORG00000013376  | -                  | -                                                                                                               | 5.065498319  | 2.163892019  | 5.04759665  | 8.607738106  |
|  |            | ENSRORG00000018218  | -                  | -                                                                                                               | 0            | 13.35918538  | 18.65819572 | 5.299482419  |

|  |  |                     |         |                                                                                                  |              |              |              |              |              |              |
|--|--|---------------------|---------|--------------------------------------------------------------------------------------------------|--------------|--------------|--------------|--------------|--------------|--------------|
|  |  | ENSRORG000000003440 | h3gat1a | beta-1,3-galactosyltransferase 1-like [Source:NCBI gene:Acc:101163306]                           | -            | -            | -4.047115466 | -2.771233406 | -0.079456344 | -1.35485616  |
|  |  | ENSRORG00000010975  | smyd2a  | N1-lysine methyltransferase SMYD2-A [Source:NCBI gene:Acc:101159335]                             | -            | -            | -3.747684031 | -0.231733961 | -1.30130033  | -1.602478116 |
|  |  | ENSRORG00000016225  | ercc1   | excision repair cross-complementation group 1 [Source:ZFIN;Acc:ZDB-GENE-040426-2886]             | -            | -            | -5.055998166 | 1.11616255   | 6.547252072  | 0.375636256  |
|  |  | ENSRORG00000006142  | kmt5ab  | lysine methyltransferase 5Ab [Source:ZFIN;Acc:ZDB-GENE-071004-17]                                | -            | -            | -3.56801145  | 1.184172592  | 3.783235261  | 0.968847192  |
|  |  | ENSRORG00000007204  | arl16   | ADP ribosylation factor like GTPase 16 [Source:NCBI gene:Acc:101186138]                          | -            | -            | -6.155613057 | 1.022191397  | 7.729515241  | 0.521313257  |
|  |  | ENSRORG00000000692  | tusc3   | tumor suppressor candidate 3 [Source:NCBI gene:Acc:101168194]                                    | -            | -            | -3.38313368  | -0.18236894  | 3.269592478  | 0.114500301  |
|  |  | ENSRORG00000008719  | nabp1a  | nucleic acid binding protein 1a [Source:ZFIN;Acc:ZDB-GENE-041212-71]                             | -            | -            | -3.317643446 | 0.515056163  | 4.600234194  | 1.768017248  |
|  |  | ENSRORG00000010767  | znh16   | zinc finger H1-type containing 6 [Source:ZFIN;Acc:ZDB-GENE-110411-39]                            | -            | -            | -3.756801151 | 1.276984166  | 4.481324871  | -0.551974872 |
|  |  | ENSRORG00000004808  | efl3b   | eukaryotic translation initiation factor 3 subunit b [Source:ZFIN;Acc:ZDB-GENE-040426-2900]      | -            | -            | -4.31821137  | -0.067847448 | 3.625310876  | 0.624567401  |
|  |  | ENSRORG00000006244  | elf3b   | eukaryotic translation initiation factor 3 subunit b [Source:ZFIN;Acc:ZDB-GENE-040426-2900]      | -            | -            | -3.865652526 | 0.895456973  | 4.91915607   | 0.158441399  |
|  |  | ENSRORG00000005127  | -       | -                                                                                                | -4.588420394 | -0.46817732  | -3.948486037 | -0.46817732  | 3.094869037  | -1.980289502 |
|  |  | ENSRORG00000011568  | ube2g1a | ubiquitin-conjugating enzyme E2G 1a (UBC7 homolog, yeast) [Source:ZFIN;Acc:ZDB-GENE-030131-6065] | -            | -            | -3.194443845 | -0.387313928 | 3.425453985  | 1.219413106  |
|  |  | ENSRORG00000009852  | -       | -                                                                                                | -4.380632997 | 0.893341051  | -3.89719432  | 6.98719432   | 1.713705381  | -            |
|  |  | ENSRORG00000005286  | -       | -                                                                                                | -4.573438823 | -2.278335319 | -2.105130486 | -3.997540537 | -0.406028142 | -            |
|  |  | ENSRORG00000006446  | pnsen   | presenilin enhancer, gamma-secretase subunit [Source:NCBI gene:Acc:101173171]                    | -            | -            | -3.283506546 | 0.086444779  | 3.323038301  | -0.06028142  |
|  |  | ENSRORG000000009347 | -       | -                                                                                                | -8.341491795 | 0.920383939  | 8.66676967   | -0.950496969 | -0.950496969 | -            |
|  |  | ENSRORG00000000492  | npm3    | nucleophosmin/nucleoplasmin 3 [Source:NCBI gene:Acc:101163269]                                   | -            | -            | -3.781726874 | 0.769487901  | 5.414813787  | 0.883433853  |
|  |  | ENSRORG00000006615  | -       | -                                                                                                | -3.50973579  | 0.893547179  | -3.50973579  | 0.893547179  | -1.705243473 | -            |
|  |  | ENSRORG00000005631  | aurka   | aurora kinase A [Source:ZFIN;Acc:ZDB-GENE-040801-181]                                            | -            | -            | -4.148130895 | 0.752669564  | 4.876582865  | -0.023732751 |
|  |  | ENSRORG00000006984  | tmem167 | transmembrane protein 167A [Source:ZFIN;Acc:ZDB-GENE-050302-29]                                  | -            | -            | -3.29304050  | -0.016887184 | 2.721855844  | -0.59076732  |
|  |  | ENSRORG00000008917  | -       | -                                                                                                | -3.032399356 | 0.41382787   | -3.032399356 | 0.41382787   | 1.918067432  | -1.527674976 |
|  |  | ENSRORG00000012153  | nop2    | NOP2 nuclear protein homolog (yeast) [Source:ZFIN;Acc:ZDB-GENE-050309-7]                         | -            | -            | -3.154102839 | 1.830482022  | 6.451401847  | 1.487302767  |
|  |  | ENSRORG00000009337  | UBL5    | ubiquitin like 5 [Source:HGNC Symbol;Acc:HGNC:13736]                                             | -            | -            | -3.721204647 | -0.740716147 | 2.43124241   | -0.548761208 |
|  |  | ENSRORG00000000864  | -       | -                                                                                                | -4.788578985 | 1.229250539  | -4.788578985 | 1.229250539  | 6.312674647  | 0.295362337  |
|  |  | ENSRORG00000002236  | ptges3b | prostaglandin H synthase 3b (cyclooxygenase 3) [Source:ZFIN;Acc:ZDB-GENE-040625-144]             | -            | -            | -4.786585085 | 0.09291534   | 5.462441514  | 0.583423657  |
|  |  | ENSRORG00000005079  | MME     | membrane metalloendopeptidase [Source:HGNC Symbol;Acc:HGNC:7154]                                 | -            | -            | -3.071196665 | 1.112232069  | 6.233572455  | -2.05062897  |
|  |  | ENSRORG00000000307  | -       | -                                                                                                | -6.419057143 | -0.395196817 | -6.419057143 | -0.395196817 | 3.027981449  | -2.96539399  |
|  |  | ENSRORG00000000486  | -       | -                                                                                                | -3.16648634  | -0.020830749 | -3.16648634  | -0.020830749 | 3.578408885  | 0.432328082  |
|  |  | ENSRORG00000009714  | -       | -                                                                                                | -4.418013045 | 1.447528228  | -4.418013045 | 1.447528228  | 5.584072642  | -0.28035709  |
|  |  | ENSRORG000000009714 | -       | -                                                                                                | -3.315470002 | -0.460393384 | -3.315470002 | -0.460393384 | 6.116821567  | -            |
|  |  | ENSRORG00000002592  | tmem53  | transmembrane protein 53 [Source:ZFIN;Acc:ZDB-GENE-040718-384]                                   | -            | -            | -3.016931142 | -0.683793702 | -0.159279027 | -2.84580614  |
|  |  | ENSRORG00000015824  | mrps10  | mitochondrial ribosomal protein S10 [Source:ZFIN;Acc:ZDB-GENE-040914-39]                         | -            |              |              |              |              |              |

|  |                     |               |                                                                                                           |              |              |             |              |
|--|---------------------|---------------|-----------------------------------------------------------------------------------------------------------|--------------|--------------|-------------|--------------|
|  | ENSORLG00000017885  | HS3ST5        | heparan sulfate-glucosamine 3-sulfotransferase 5 [Source:NCBI gene:Acc:101165781]                         | -0.205203017 | -0.970475533 | 3.205907855 | 3.971666102  |
|  | ENSORLG00000010320  | -             | -                                                                                                         | 0            | 0            | 18.09281071 | 18.0930748   |
|  | ENSORLG00000007411  | -             | -                                                                                                         | 2.596893132  | 0.289789538  | 6.06737962  | 8.374916419  |
|  | ENSORLG00000008364  | zpc-172282    | zpc-172282 [Source:ZFIN:Acc:ZDB-GENE-080219-38]                                                           | 2.531807233  | 4.474749643  | 3.272188523 | 3.272188523  |
|  | ENSORLG00000019377  | zpc-172282    | zpc-172282 [Source:ZFIN:Acc:ZDB-GENE-080219-38]                                                           | 2.304262434  | 3.078602231  | 5.85074882  | 5.5706919628 |
|  | ENSORLG00000002042  | RF00001       | 5S ribosomal RNA [Source:NCBI gene:Acc:111947244]                                                         | 14.42437102  | 12.08932799  | 3.060327729 | 5.396835921  |
|  | ENSORLG00000006868  | stk33         | serine/threonine kinase 33 [Source:ZFIN:Acc:ZDB-GENE-040724-242]                                          | 4.34787119   | 1.825773898  | 4.842255172 | 7.364835738  |
|  | ENSORLG00000000874  | -             | -                                                                                                         | -13.00279444 | 0.09876467   | 16.21216463 | 3.111091168  |
|  | ENSORLG00000016437  | ttc8          | tetratricopeptide repeat domain 8 [Source:NCBI gene:Acc:101163700]                                        | 1.061816025  | -0.065011099 | 4.673568735 | 5.800880945  |
|  | ENSORLG00000005686  | si:dkexp-69c1 | uncharacterized LOC101171185 [Source:NCBI gene:Acc:101171185]                                             | -10.71192504 | 2.016112569  | 16.49703976 | 1.651525189  |
|  | ENSORLG00000010416  | -             | -                                                                                                         | -10.41914909 | 0.221178694  | 15.66854127 | 5.028693752  |
|  | ENSORLG00000003306  | -             | -                                                                                                         | 10.5708898   | 12.95452895  | 5.43252687  | 3.049361003  |
|  | ENSORLG00000002494  | pH1d3         | PH1 domain containing 3 [Source:ZFIN:Acc:ZDB-GENE-040722-21]                                              | 2.527502778  | 1.124819709  | 7.53921956  | 8.9423878    |
|  | ENSORLG00000009441  | zdc           | Oryza latipes phosphatidyl (zdc) mRNA [Source:RefSeq mRNA:Acc:NM_001177855]                               | 11.18341208  | 11.23521247  | 5.048675104 | 4.997341347  |
|  | ENSORLG00000010614  | dnaJ6b        | DnaJ (Hsp40) homolog, subfamily B, member 6b [Source:ZFIN:Acc:ZDB-GENE-040426-1122]                       | -0.977250891 | -0.330962859 | 3.959835443 | 3.314032361  |
|  | ENSORLG00000015607  | -             | -                                                                                                         | 1.332345169  | 1.379418227  | 3.619524561 | 5.73936349   |
|  | ENSORLG00000012879  | -             | -                                                                                                         | 1.605294752  | 0.392928622  | 3.602043695 | 4.81389494   |
|  | ENSORLG00000017596  | -             | -                                                                                                         | 0            | 8.931978467  | 17.61890337 | 8.685392091  |
|  | ENSORLG00000010747  | -             | -                                                                                                         | -9.031080852 | -0.369860348 | 18.99681101 | 10.29611483  |
|  | ENSORLG00000006156  | tht1b         | ferritin, heavy polypeptide 1b [Source:ZFIN:Acc:ZDB-GENE-040912-30]                                       | -0.997126765 | -0.535664091 | 3.85820567  | 3.98984278   |
|  | ENSORLG00000011321  | AKR1D1        | 3-oxo-5-beta-steroid 4-dehydrogenase [Source:NCBI gene:Acc:101107970]                                     | 3.348479508  | 0.3301133678 | 4.300110463 | 4.300110463  |
|  | ENSORLG00000017175  | zcdc173       | coiled-coil domain containing 173 [Source:ZFIN:Acc:ZDB-GENE-0811104-457]                                  | -1.085816545 | 0.315382597  | 8.484092298 | 7.083379121  |
|  | ENSORLG00000009146  | tescb         | tescalin b [Source:ZFIN:Acc:ZDB-GENE-040426-1903]                                                         | -0.061072886 | 4.06813456   | 9.15110751  | 9.032404948  |
|  | ENSORLG00000004550  | -             | -                                                                                                         | -13.55200259 | 1.98200398   | 19.60596858 | 4.072452513  |
|  | ENSORLG00000000175  | -             | -                                                                                                         | -1.777817414 | 0.358334486  | 5.66856673  | 3.52019923   |
|  | ENSORLG00000016751  | CCDC148       | coiled-coil domain containing 148 [Source:HGNC Symbol:Acc:HGNC:25191]                                     | 6.161049669  | 3.478708783  | 3.065705765 | 5.48538439   |
|  | ENSORLG00000010354  | amtp          | alpha-3-microglobulin/fukutin precursor [Source:ZFIN:Acc:ZDB-GENE-040426-1608]                            | -0.591126349 | -0.516264281 | 3.315803841 | 3.241427344  |
|  | ENSORLG00000018066  | zpc135        | G protein-coupled receptor 135 [Source:ZFIN:Acc:ZDB-GENE-080429-3]                                        | 2.048964676  | 4.012981713  | 4.925746366 | 6.562212587  |
|  | ENSORLG00000009821  | dnaH12        | dymin, axonemal, heavy chain 12 [Source:ZFIN:Acc:ZDB-GENE-090311-9]                                       | 3.572128796  | 3.421684194  | 6.456386174 | 6.275052524  |
|  | ENSORLG00000006276  | mapk10        | mitogen-activated protein kinase 10 [Source:ZFIN:Acc:ZDB-GENE-051120-117]                                 | 1.967960372  | -11.11969336 | 3.06108348  | 16.14924182  |
|  | ENSORLG00000015987  | zmp-00000010  | zmp-0000001088 [Source:ZFIN:Acc:ZDB-GENE-140106-48]                                                       | 12.55072755  | 11.11557692  | 3.20442438  | 4.64040998   |
|  | ENSORLG00000011890  | sidley-84k17  | dymin axonemal light chain 1 [Source:HGNC Symbol:Acc:HGNC:23247]                                          | -13.03710763 | 2.405196377  | 2.207857167 | 4.836757343  |
|  | ENSORLG00000015927  | -             | -                                                                                                         | 0.785201418  | 0.731137788  | 3.892178929 | 3.371730979  |
|  | ENSORLG00000010740  | wtf60         | WD repeat domain 60 [Source:ZFIN:Acc:ZDB-GENE-140821-1]                                                   | -0.289575124 | 0.097298665  | 4.207971712 | 3.84158235   |
|  | ENSORLG00000007564  | arf5a         | activating transcription factor 5a [Source:ZFIN:Acc:ZDB-GENE-060526-205]                                  | 14.48636242  | 12.76468502  | 3.818409233 | 5.540553603  |
|  | ENSORLG00000006573  | lrcc6         | leucine rich repeat containing 6 [Source:ZFIN:Acc:ZDB-GENE-040927-2]                                      | -0.781051192 | -1.239409177 | 3.764445017 | 4.223292524  |
|  | ENSORLG00000010523  | ztc38         | zebrafish testis-expressed 38 [Source:ZFIN:Acc:ZDB-GENE-060312-39]                                        | -0.690764072 | 0.10570803   | 5.679307519 | 4.88332018   |
|  | ENSORLG00000012847  | phactr3       | phosphatase and actin regulator 3 [Source:ZFIN:Acc:ZDB-GENE-101230-3]                                     | -0.527139836 | -1.214144637 | 3.47794989  | 4.165439657  |
|  | ENSORLG00000005723  | ano3          | anoctamin 3 [Source:ZFIN:Acc:ZDB-GENE-111031-3]                                                           | 12.93519084  | 9.334250935  | 3.211071499 | 8.612480329  |
|  | ENSORLG00000009611  | TEK1          | tekin 1 [Source:HGNC Symbol:Acc:HGNC:15534]                                                               | 3.664374238  | 1.178479027  | 6.47617255  | 8.962556042  |
|  | ENSORLG00000018866  | -             | -                                                                                                         | 0.568471834  | -0.268252095 | 3.145351361 | 3.982522817  |
|  | ENSORLG00000008841  | Trmem67       | transmembrane protein 67 [Source:NCBI gene:Acc:101188892]                                                 | -1.719087004 | -0.702350972 | 4.78497387  | 3.768772287  |
|  | ENSORLG00000017728  | IFT22         | intraflagellar transport 22 [Source:HGNC Symbol:Acc:HGNC:21895]                                           | -0.738742007 | 0.990135073  | 4.80938336  | 3.08646357   |
|  | ENSORLG00000008115  | catp7b        | calcium binding protein 7b [Source:ZFIN:Acc:ZDB-GENE-060526-565]                                          | 0.049230482  | -0.364151994 | 5.87966012  | 6.29325942   |
|  | ENSORLG00000016001  | -             | -                                                                                                         | 0            | 12.50391019  | 16.31295597 | 3.809517569  |
|  | ENSORLG00000009209  | -             | -                                                                                                         | 1.330234374  | -0.218290368 | 3.336066541 | 4.885096067  |
|  | ENSORLG00000011498  | -             | -                                                                                                         | 2.173898018  | 2.275432463  | 4.880094518 | 4.779043935  |
|  | ENSORLG00000015513  | ARL2BP        | ADP ribosylation factor like GTPase 2 binding protein [Source:HGNC Symbol:Acc:HGNC:17146]                 | -2.46199679  | 1.529757335  | 7.331563827 | 3.340294496  |
|  | ENSORLG00000009053  | dnaJ13        | DnaJ (Hsp40) homolog, subfamily B, member 13 [Source:ZFIN:Acc:ZDB-GENE-040910-4]                          | 3.272603099  | -0.170593156 | 7.531778077 | 10.19545758  |
|  | ENSORLG00000011540  | -             | -                                                                                                         | -0.188581318 | -1.29297636  | 3.843049277 | 4.949928482  |
|  | ENSORLG00000011581  | dotk3         | doublecortin-like kinase 3 [Source:ZFIN:Acc:ZDB-GENE-081104-224]                                          | 5.097075431  | 2.930037889  | 4.158241839 | 6.325806074  |
|  | ENSORLG00000014287  | -             | -                                                                                                         | 11.28463905  | 12.58543909  | 9.399375009 | 8.099042577  |
|  | ENSORLG000000005425 | zld31a        | zona pellucida-like domain containing 1a [Source:ZFIN:Acc:ZDB-GENE-110411-31]                             | 0            | 0            | 15.84372996 | 15.84422669  |
|  | ENSORLG00000011164  | catip         | ciliogenesis associated TTC17 interacting protein [Source:ZFIN:Acc:ZDB-GENE-060929-1170]                  | -1.184216919 | -0.780239882 | 6.283198251 | 8.26010324   |
|  | ENSORLG00000012825  | -             | -                                                                                                         | -2.615902268 | 0.879282988  | 7.066326628 | 3.571627075  |
|  | ENSORLG00000015767  | myhpc1        | myosin binding protein C, slow type [Source:ZFIN:Acc:ZDB-GENE-041114-196]                                 | 2.683929776  | 1.490600429  | 3.964171028 | 5.175985541  |
|  | ENSORLG00000006960  | -             | -                                                                                                         | -15.1048888  | -1.520889567 | 19.51836042 | 5.934772018  |
|  | ENSORLG00000006843  | dnaH9         | dymin, axonemal, assembly factor 3 like [Source:ZFIN:Acc:ZDB-GENE-150903-1]                               | 2.854905107  | 0.776927426  | 5.67951415  | 7.75797041   |
|  | ENSORLG00000013148  | cfap45        | cilia and flagella associated protein 45 [Source:ZFIN:Acc:ZDB-GENE-070209-143]                            | 6.761735121  | 3.4197195    | 4.374056678 | 8.175566678  |
|  | ENSORLG00000013420  | ncs1a         | neuronal calcium sensor 1 [Source:NCBI gene:Acc:101160077]                                                | -0.511859436 | 0.248256482  | 4.778018725 | 4.018386235  |
|  | ENSORLG00000004477  | SLCO1C1       | solute carrier organic anion transporter family member 1C1 [Source:HGNC Symbol:Acc:HGNC:13819]            | -1.468433907 | -1.02066089  | 4.479611808 | 4.032322815  |
|  | ENSORLG00000015571  | -             | -                                                                                                         | 1.064816157  | -0.124818003 | -3.44144271 | 4.621563415  |
|  | ENSORLG00000012056  | cfap300       | cilia and flagella associated protein 300 [Source:ZFIN:Acc:ZDB-GENE-040724-203]                           | -0.867963602 | 0.228289221  | 6.724650547 | 5.628882267  |
|  | ENSORLG00000014775  | prkacab       | protein kinase, cAMP-dependent, catalytic, alpha genome duplicate b [Source:ZFIN:Acc:ZDB-GENE-040801-208] | -0.544298953 | 0.977914233  | 4.966341409 | 3.444613186  |

|  |                     |         |                                                                                           |               |              |              |              |
|--|---------------------|---------|-------------------------------------------------------------------------------------------|---------------|--------------|--------------|--------------|
|  | ENSORLG00000009047  | -       | -                                                                                         | -3.700568845  | -0.038535956 | 8.12628022   | 4.464732001  |
|  | ENSORLG00000005528  | trappc2 | trafficking protein particle complex 2 like [Source:NCBI gene:Acc:101174741]              | -3.930077748  | 2.182517268  | 7.670198176  | 1.484857481  |
|  | ENSORLG00000014793  | -       | -                                                                                         | 3.002115426   | 0.106892828  | 4.277583127  | 1.166262605  |
|  | ENSORLG00000008081  | -       | -                                                                                         | -3.34981044   | -0.8893908   | 4.471039649  | 1.95397449   |
|  | ENSORLG00000006166  | elrp5   | elastin-like protein 5 [Source:ZFIN:Acc:ZDB-GENE-061215-33]                               | -4.97180688   | 0.902705523  | 5.890575523  | 0.02178598   |
|  | ENSORLG00000003718  | tusc2a  | tumor suppressor 2, mitochondrial calcium regulator [Source:NCBI gene:Acc:101169352]      | -3.589442537  | -0.535590302 | 4.066739836  | 1.017791611  |
|  | ENSORLG00000008147  | cdc115  | coiled-coil domain containing 115 [Source:ZFIN:Acc:ZDB-GENE-050227-20]                    | -16.782021222 | 3.174469241  | 19.04628249  | -0.88971879  |
|  | ENSORLG00000015816  | -       | -                                                                                         | -3.3087681    | -0.018649357 | 4.548293538  | 2.58659751   |
|  | ENSORLG000000009179 | fuom    | fucose mutarotase [Source:NCBI gene:Acc:101170455]                                        | -16.57850375  | -0.607762923 | 17.91127869  | 1.941028022  |
|  | ENSORLG000000006166 | elrp5   | elastin-like protein 5 [Source:ZFIN:Acc:ZDB-GENE-061215-33]                               | -4.662021904  | 0.253595802  | 4.622404292  | -0.292731319 |
|  | ENSORLG00000017293  | mettl8  | methyltransferase like 8 [Source:ZFIN:Acc:ZDB-GENE-041114-16]                             | 16.26336421   | 2.295508185  | 17.05184942  | -1.50655703  |
|  | ENSORLG00000012568  | myk4b   | myosin light chain kinase family, member 4b [Source:ZFIN:Acc:ZDB-GENE-041001-128]         | -15.76912629  | -2.990799513 | 11.59350784  | -1.184239176 |
|  | ENSORLG00000003200  | atpaf2  | ATP synthase mitochondrial F1 complex assembly factor 2 [Source:NCBI gene:Acc:101173128]  | -3.059820767  | 0.461675223  | 3.69629266   | 1.075201668  |
|  | ENSORLG00000008912  | ap2s1   | aps2-related protein complex 2, sigma 1 subunit [Source:ZFIN:Acc:ZDB-GENE-040426-2174]    | -3.848475918  | 1.293852013  | -3.848475918 | 0.984017851  |
|  | ENSORLG00000011191  | hirip3  | HIRA interacting protein 3 [Source:ZFIN:Acc:ZDB-GENE-050131-5753]                         | -4.539177179  | 0.539036011  | 5.170444298  | 0.09271541   |
|  | ENSORLG00000015648  | arfgap1 | ADP-ribosylation factor GTPase activating protein 1 [Source:ZFIN:Acc:ZDB-GENE-041114-130] | -3.142152558  | 0.889863214  | 4.983842634  | 0.982317553  |
|  | ENSORLG00000013371  | mana    | mannosidase, endo-alpha [Source:ZFIN:Acc:ZDB-GENE-040912-87]                              | -3.012392715  | -0.545907789 | 1.377663946  | -1.08833604  |
|  | ENSORLG00000003357  | -       | -                                                                                         | -3.921235809  | 0.9735476    | 3.96876611   | -0.92531395  |
|  | ENSORLG00000008291  | tyar    | Tyrosine antibody reactive [Source:NCBI gene:Acc:101172807]                               | -4.08789308   | 1.120770616  | 5.507279974  | 0.299110924  |
|  | ENSORLG00000013816  | dup12   | dual specificity phosphatase 12 [Source:NCBI gene:Acc:101155145]                          | -3.058199644  | -0.113822464 | 0.113822464  | -2.931403009 |
|  | ENSORLG00000015648  | arfgap1 | ADP-ribosylation factor GTPase activating protein 1 [Source:ZFIN:Acc:ZDB-GENE-041114-130] | -3.142152558  | 0.889863214  | 4.983842634  | 0.982317553  |
|  | ENSORLG00000013371  | mana    | mannosidase, endo-alpha [Source:ZFIN:Acc:ZDB-GENE-040912-87]                              | -3.012392715  | -0.545907789 | 1.377663946  | -1.08833604  |
|  | ENSORLG00000003357  | -       | -                                                                                         | -3.921235809  | 0.9735476    | 3.96876611   | -0.92531395  |
|  | ENSORLG00000008291  | tyar    | Tyrosine antibody reactive [Source:NCBI gene:Acc:101172807]                               | -4.08789308   | 1.120770616  | 5.507279974  | 0.299110924  |
|  | ENSORLG00000013816  | dup12   | dual specificity phosphatase 12 [Source:NCBI gene:Acc:101155145]                          | -3.058199644  | -0.113822464 | 0.113822464  | -2.931403009 |
|  | ENSORLG00000015648  | arfgap1 | ADP-ribosylation factor GTPase activating protein 1 [Source:ZFIN:Acc:ZDB-GENE-041114-130] | -3.142152558  | 0.889863214  | 4.983842634  | 0.982317553  |
|  | ENSORLG00000013371  | mana    | mannosidase, endo-alpha [Source:ZFIN:Acc:ZDB-GENE-040912-87]                              | -3.012392715  | -0.545907789 | 1.377663946  | -1.08833604  |
|  | ENSORLG00000003357  | -       | -                                                                                         | -3.921235809  | 0.9735476    | 3.96876611   | -0.92531395  |
|  | ENSORLG00000008291  | tyar    | Tyrosine antibody reactive [Source:NCBI gene:Acc:101172807]                               | -4.08789308   | 1.120770616  | 5.507279974  | 0.299110924  |
|  | ENSORLG00000013816  | dup12   | dual specificity phosphatase 12 [Source:NCBI gene:Acc:101155145]                          | -3.058199644  | -0.113822464 | 0.113822464  | -2.931403009 |
|  | ENSORLG00000015648  | arfgap1 | ADP-ribosylation factor GTPase activating protein 1 [Source:ZFIN:Acc:ZDB-GENE-041114-130] | -3.142152558  | 0.889863214  | 4.983842634  | 0.982317553  |
|  | ENSORLG00000013371  | mana    | mannosidase, endo-alpha [Source:ZFIN:Acc:ZDB-GENE-040912-87]                              | -3.012392715  | -0.545907789 | 1.377663946  | -1.08833604  |
|  | ENSORLG00000003357  | -       | -                                                                                         | -3.921235809  | 0.9735476    | 3.96876611   | -0.92531395  |
|  | ENSORLG00000008291  | tyar    | Tyrosine antibody reactive [Source:NCBI gene:Acc:101172807]                               | -4.08789308   | 1.120770616  | 5.507279974  | 0.299110924  |
|  | ENSORLG00000013816  | dup12   | dual specificity phosphatase 12 [Source:NCBI gene:                                        |               |              |              |              |

|  |                     |           |                                                                                                        |              |              |             |             |
|--|---------------------|-----------|--------------------------------------------------------------------------------------------------------|--------------|--------------|-------------|-------------|
|  | ENSORLG0000009503   | -         | -                                                                                                      | -2.237513787 | -0.896117581 | 4.830313442 | 3.489401996 |
|  | ENSORLG0000004150   | catp2a    | calcium-binding protein 2 [Source:NCBI gene:Acc:101165211]                                             | 10.56470207  | 12.40596844  | 6.141588188 | 4.300765075 |
|  | ENSORLG0000007169   | hexa5     | hexosaminidase A (alpha polypeptide) [Source:ZFIN:Acc:ZDB-GENE-059417-283]                             | -0.45167883  | 0.17304801   | 5.668742015 | 5.04413318  |
|  | ENSORLG0000000762   | ccdc65    | coiled-coil domain containing 65 [Source:ZFIN:Acc:ZDB-GENE-030616-358]                                 | 1.914341502  | -0.67823262  | 3.97924405  | 6.570893155 |
|  | ENSORLG00000012644  | -         | -                                                                                                      | 4.361760153  | 5.531543014  | 4.631167949 | 3.461876094 |
|  | ENSORLG00000014813  | -         | -                                                                                                      | -1.489975464 | -0.098557235 | 5.361121493 | 3.970187928 |
|  | ENSORLG00000006075  | -         | -                                                                                                      | 1.810954032  | 2.178252108  | 5.413221575 | 5.048602753 |
|  | ENSORLG00000011965  | -         | -                                                                                                      | 0            | 11.03365013  | 16.77118122 | 5.73800224  |
|  | ENSORLG00000009682  | -         | -                                                                                                      | -0.388978366 | 0.133677221  | 3.58971722  | 3.067546464 |
|  | ENSORLG00000004848  | dazl      | deleted in azoospermia like [Source:NCBI gene:Acc:100094918]                                           | 0.923292128  | 0.824423145  | 4.432967912 | 4.532321532 |
|  | ENSORLG00000012338  | mcrip1    | MAPK regulated co-repressor interacting protein 1 [Source:NCBI gene:Acc:101162213]                     | -0.548902445 | 0.376796059  | 4.222683477 | 3.297469921 |
|  | ENSORLG00000011618  | katna1    | katanin p60 ATPase-containing subunit A-like 1 [Source:NCBI gene:Acc:101163120]                        | -0.696709505 | -0.493743665 | 3.567735527 | 3.365254701 |
|  | ENSORLG00000000163  | -         | -                                                                                                      | -1.699507572 | -0.193518052 | 4.812329554 | 3.30682597  |
|  | ENSORLG00000012598  | bxd1      | B9 domain containing 1 [Source:NCBI gene:Acc:101164060]                                                | -1.894169991 | -0.174113646 | 5.577536305 | 3.857964734 |
|  | ENSORLG00000009732  | -         | -                                                                                                      | -9.734591084 | -9.73457415  | 19.04065055 | 19.04114727 |
|  | ENSORLG00000007125  | armcd9    | armadillo repeat containing 9 [Source:ZFIN:Acc:ZDB-GENE-109922-67]                                     | 0.411124829  | 0.513900629  | 4.54656476  | 4.52756669  |
|  | ENSORLG00000002854  | rab30     | RAB30, member RAS oncogene family [Source:NCBI gene:Acc:101172181]                                     | 1.615922746  | 1.090564247  | 3.257573295 | 3.783416601 |
|  | ENSORLG00000003841  | catp2b    | calcium binding protein 2b [Source:ZFIN:Acc:ZDB-GENE-081028-55]                                        | 11.14984871  | 5.238865456  | 16.39920446 | 16.39920446 |
|  | ENSORLG00000017033  | stk39     | serine threonine kinase 39 [Source:ZFIN:Acc:ZDB-GENE-145108-194]                                       | 1.412065637  | 1.311906668  | 3.80129587  | 3.801885661 |
|  | ENSORLG00000013913  | -         | -                                                                                                      | 3.230835514  | 2.005233288  | 3.783414643 | 5.009480186 |
|  | ENSORLG00000003818  | nchp1     | nephrocytin 1 [Source:NCBI gene:Acc:101156350]                                                         | 0.569756463  | -0.073584333 | 4.251103397 | 4.894928863 |
|  | ENSORLG00000010878  | WDR63     | WD repeat domain 63 [Source:HGNC Symbol:Acc:HGNC:30711]                                                | 2.616089379  | 0.690664333  | 4.06758275  | 9.99493791  |
|  | ENSORLG00000003775  | ZMYND10   | zinc finger MYND-type containing 10 [Source:HGNC Symbol:Acc:HGNC:19412]                                | 13.43180706  | 11.88016128  | 7.889764012 | 11.48718274 |
|  | ENSORLG00000013908  | -         | -                                                                                                      | 1.023313518  | 1.277926787  | 3.763968993 | 3.509839244 |
|  | ENSORLG00000005063  | arf6      | ADP-ribosylation factor-like 6 [Source:ZFIN:Acc:ZDB-GENE-041219-2]                                     | -4.470493051 | 2.164608636  | 9.744506108 | 3.109883772 |
|  | ENSORLG00000014143  | -         | -                                                                                                      | -1.27216492  | -1.144138645 | 5.674279307 | 5.546737828 |
|  | ENSORLG00000013903  | cer54b    | ceramide synthase 2 [Source:NCBI gene:Acc:101155637]                                                   | 1.093618747  | 1.409941709  | 3.992596448 | 3.676758138 |
|  | ENSORLG00000007661  | ARF3      | ADP ribosylation factor 3 [Source:HGNC Symbol:Acc:HGNC:654]                                            | 1.570673618  | -1.01797512  | 3.660589555 | 6.249718022 |
|  | ENSORLG00000000671  | -         | -                                                                                                      | 2.469676431  | 0.821128809  | 3.296485532 | 4.945518033 |
|  | ENSORLG00000017151  | klh41a    | kelch like family member 41 [Source:NCBI gene:Acc:101157898]                                           | 10.16239133  | 10.13865578  | 6.547190506 | 6.3914001   |
|  | ENSORLG00000006974  | -         | -                                                                                                      | 0            | 12.72181139  | 16.79703759 | 40.78989847 |
|  | ENSORLG00000003967  | -         | -                                                                                                      | -0.326090874 | 0.399170834  | 4.236280975 | 3.144464203 |
|  | ENSORLG00000006959  | -         | -                                                                                                      | -12.64601498 | 0.69897267   | 16.3893447  | 3.326494548 |
|  | ENSORLG00000004806  | -         | -                                                                                                      | -11.26436459 | -0.062894597 | 19.87870021 | 7.65689024  |
|  | ENSORLG00000007387  | ppp1r2    | protein phosphatase 1 regulatory inhibitor subunit 2 [Source:NCBI gene:Acc:101161720]                  | 0.574339862  | 0.50433153   | 3.371660441 | 3.442170305 |
|  | ENSORLG00000006609  | lfnc2     | Fanconi anemia complementation group E [Source:ZFIN:Acc:ZDB-GENE-060510-5]                             | -1.74809811  | -0.481354011 | 4.470088331 | 3.203829213 |
|  | ENSORLG00000009216  | nmt2      | N-methyltransferase 2 [Source:ZFIN:Acc:ZDB-GENE-090131-717]                                            | -1.816396806 | 0.27095662   | 5.331754062 | 8.428828262 |
|  | ENSORLG00000010328  | -         | -                                                                                                      | 2.811055991  | 2.284339108  | 7.406893306 | 7.934198044 |
|  | ENSORLG00000007266  | zpc194655 | NEDD8 [Source:NCBI gene:Acc:101170466]                                                                 | 1.68716378   | 2.667445419  | 7.827632897 | 6.847836593 |
|  | ENSORLG00000009723  | dlnc1     | deleted in lung and esophageal cancer 1 [Source:ZFIN:Acc:ZDB-GENE-091204-65]                           | 14.35695259  | 12.11745155  | 4.49115254  | 6.731125549 |
|  | ENSORLG00000011128  | ircv51    | leucine rich repeat containing 51 [Source:ZFIN:Acc:ZDB-GENE-060929-962]                                | 13.81355275  | 0            | 7.551810817 | 21.36585537 |
|  | ENSORLG00000009314  | top1      | DNA topoisomerase 1 [Source:NCBI gene:Acc:101160729]                                                   | 3.102763391  | 2.524867319  | 6.50938669  | 7.087744575 |
|  | ENSORLG00000009892  | tmem1071  | transmembrane protein 107 [Source:NCBI gene:Acc:101155271]                                             | -2.991084262 | 1.74567843   | 7.942643658 | 3.206365021 |
|  | ENSORLG00000017790  | ak7a      | adenylyate kinase 7a [Source:ZFIN:Acc:ZDB-GENE-040724-122]                                             | 2.763568812  | 0.759043665  | 4.518009174 | 5.623090289 |
|  | ENSORLG00000005337  | -         | -                                                                                                      | 2.417138722  | 1.088722233  | 3.82627259  | 5.155174327 |
|  | ENSORLG00000011086  | KCNK12    | potassium two pore domain channel subfamily K member 12 [Source:HGNC Symbol:Acc:HGNC:6274]             | -1.712499315 | -2.261460253 | 6.501120572 | 7.050594086 |
|  | ENSORLG00000012423  | -         | -                                                                                                      | 0            | 11.61020359  | 16.39977225 | 5.49042236  |
|  | ENSORLG00000013316  | -         | -                                                                                                      | -1.27946918  | -0.17654186  | 4.23839531  | 3.130418417 |
|  | ENSORLG00000006779  | sar1ab    | GTP-binding protein SAR1b [Source:NCBI gene:Acc:101155189]                                             | -1.260656037 | 0.69974061   | 6.194770863 | 4.248555776 |
|  | ENSORLG00000015824  | lysmd1    | LysM domain containing 1 [Source:NCBI gene:Acc:101166660]                                              | 0.310761623  | 1.723806504  | 4.691803789 | 3.279243676 |
|  | ENSORLG00000013466  | armc2     | armadillo repeat containing 2 [Source:ZFIN:Acc:ZDB-GENE-041034-7]                                      | 2.461455537  | -0.9812637   | 3.365630266 | 6.808834239 |
|  | ENSORLG00000012227  | -         | -                                                                                                      | 1.92017077   | 1.951497764  | 3.299682396 | 3.298838673 |
|  | ENSORLG00000000536  | icn       | ictacalcin [Source:ZFIN:Acc:ZDB-GENE-030131-8599]                                                      | 11.14502779  | 0            | 5.685789564 | 16.83128782 |
|  | ENSORLG000000050272 | mdh1b     | malate dehydrogenase 1B, NAD (soluble) [Source:ZFIN:Acc:ZDB-GENE-060289-384]                           | 2.243278795  | -0.454848049 | 4.27077389  | 6.975689184 |
|  | ENSORLG00000006856  | -         | -                                                                                                      | 5.73335056   | 0.26156749   | 4.085456869 | 9.557573145 |
|  | ENSORLG00000015479  | -         | -                                                                                                      | 13.8497286   | 0            | 6.542431363 | 20.38446172 |
|  | ENSORLG00000007297  | ribc1     | RIB43A domain with coiled-coils 1 [Source:ZFIN:Acc:ZDB-GENE-081031-7]                                  | 2.433185719  | -2.788305343 | 7.114052513 | 12.33602859 |
|  | ENSORLG00000006069  | -         | -                                                                                                      | 0            | 0            | 16.92176459 | 16.92226139 |
|  | ENSORLG00000009547  | ldgalt5   | UDP-Gal4betaGlcNAc beta 1,4-galactosyltransferase, polyphosphate 5 [Source:ZFIN:Acc:ZDB-GENE-060628-3] | 3.85071927   | 3.044516291  | 3.90430067  | 4.710984732 |
|  | ENSORLG00000004838  | serpin2b  | serpin family F member 2 [Source:NCBI gene:Acc:101163835]                                              | 9.343385613  | 11.07921142  | 7.890544452 | 6.155188869 |
|  | ENSORLG00000011219  | -         | -                                                                                                      | 0            | 14.01119667  | 17.63266256 | 3.62139302  |
|  | ENSORLG00000002800  | -         | -                                                                                                      | 0.934664883  | 1.042157701  | 3.87475312  | 3.767746689 |
|  | ENSORLG00000006175  | -         | -                                                                                                      | 3.793504201  | -1.045839376 | 4.33717081  | 9.176979548 |
|  | ENSORLG00000011790  | -         | -                                                                                                      | -2.109128397 | -0.316700055 | 4.95033992  | 3.158395167 |

|  |                     |           |                                                                                       |              |              |              |              |
|--|---------------------|-----------|---------------------------------------------------------------------------------------|--------------|--------------|--------------|--------------|
|  | ENSORLG00000014826  | rip7a     | ribosomal RNA processing 7 homolog A [Source:NCBI gene:Acc:101157059]                 | -3.358273426 | 0.106142328  | 2.755189941  | -0.70874083  |
|  | ENSORLG000000006704 | -         | -                                                                                     | -3.335175806 | 2.99473009   | 4.550834538  | -1.778870808 |
|  | ENSORLG00000000143  | -         | -                                                                                     | -5.288217287 | 0.776760753  | 6.995565745  | 0.981072186  |
|  | ENSORLG000000004230 | cdc43     | coiled-coil domain containing 43 [Source:ZFIN:Acc:ZDB-GENE-040426-1587]               | -3.278646622 | -0.626547757 | 1.665071407  | -0.986421767 |
|  | ENSORLG00000006336  | -         | -                                                                                     | -5.209991094 | -0.56559863  | 3.798238402  | -0.842526057 |
|  | ENSORLG00000015812  | sidkeyp-9 | sidkeyp-9h10.5 [Source:ZFIN:Acc:ZDB-GENE-070912-693]                                  | -3.585196244 | -0.412940113 | 2.58892711   | -0.582843991 |
|  | ENSORLG00000014594  | -         | -                                                                                     | -4.22720841  | 0.835903527  | 2.201217276  | 2.358938527  |
|  | ENSORLG00000014700  | -         | -                                                                                     | -5.116812119 | 0.197268692  | 4.072228253  | 1.841185861  |
|  | ENSORLG000000004354 | HAU51     | HAU5 augmin like complex subunit 1 [Source:NCBI gene:Acc:101168876]                   | -3.89919474  | 0.51207437   | 4.88430777   | 0.472883515  |
|  | ENSORLG00000009765  | bicop     | BRC2 and CDKN1A interacting protein [Source:NCBI gene:Acc:101165343]                  | -3.026251666 | 0.334576723  | 4.414084963  | 1.017477797  |
|  | ENSORLG00000007932  | ron2      | reticulocalbin 2 [Source:ZFIN:Acc:ZDB-GENE-050706-62]                                 | -6.15271044  | 0.246844943  | 5.682582825  | -0.716487649 |
|  | ENSORLG00000003851  | -         | -                                                                                     | -5.02828266  | 0.753413936  | 5.495717446  | -0.285508589 |
|  | ENSORLG00000008205  | ctsp43    | CTD small phosphatase-like protein 2-B [Source:NCBI gene:Acc:101165797]               | -3.582510925 | -0.14020689  | 2.472561707  | -0.96295736  |
|  | ENSORLG00000013879  | yeast4    | YEATS domain containing 4 [Source:NCBI gene:Acc:101163215]                            | -4.670549279 | 1.559138018  | 5.086701147  | -1.142500974 |
|  | ENSORLG00000006650  | sidkeyp-2 | sidkeyp-2B9.1 [Source:ZFIN:Acc:ZDB-GENE-091204-297]                                   | -16.6923086  | -2.176416702 | 12.99614665  | -1.91266739  |
|  | ENSORLG00000013969  | EFN2A     | efrin A2 [Source:HGNC Symbol:Acc:HGNC:3222]                                           | -3.175884632 | -0.98743938  | -6.031221529 | -2.819161425 |
|  | ENSORLG00000009402  | po5c      | POCS centrorial protein homolog (Chlamydomonas) [Source:ZFIN:Acc:ZDB-GENE-060526-158] | -3.043193217 | -0.162956546 | 3.633841673  | 0.753729927  |
|  | ENSORLG00000015185  | tango2    | transport and org organization 2 homolog [Source:NCBI gene:Acc:101156177]             | -3.544662166 | 0.907276645  | 4.964545306  | 0.517999101  |
|  | ENSORLG00000005711  | tm14a     | thioredoxin like 4A [Source:NCBI gene:Acc:101166315]                                  | -3.646737609 | 1.450105559  | -2.52082823  | 4.139301865  |
|  | ENSORLG00000006817  | -         | -                                                                                     | -3.555929673 | -0.252082823 | 4.139301865  | 0.835400141  |
|  | ENSORLG00000007900  | eloch     | elangan C [Source:NCBI gene:Acc:101173584]                                            | -6.285460078 | 2.301282756  | 7.569492667  | 1.052000732  |
|  | ENSORLG00000009440  | pdpr1     | P53 and DNA-damage regulated 1 [Source:ZFIN:Acc:ZDB-GENE-050417-276]                  | -3.62293006  | 1.337712167  | 4.995851425  | 0.036313026  |
|  | ENSORLG00000008400  | -         | -                                                                                     | -4.149318517 | -0.102921217 | 4.493702173  | -2.764354323 |
|  | ENSORLG0000001312   | -         | -                                                                                     | -6.49200242  | -0.86470164  | -9.631249825 | 15.29318604  |
|  | ENSORLG00000009577  | cenpn     | centromere protein N [Source:ZFIN:Acc:ZDB-GENE-030616-408]                            | -3.953722802 | -0.22880615  | 3.493758534  | -0.230673752 |
|  | ENSORLG00000011717  | ube24     | ubiquitin-conjugating enzyme E2 D4 [Source:NCBI gene:Acc:101172587]                   | -8.126629035 | 1.785466675  | 10.500091319 | 0.688789056  |
|  | ENSORLG00000012834  | gmnn      | geminin, DNA replication inhibitor 2 [Source:ZFIN:Acc:ZDB-GENE-030429-30]             | -3.151822289 | 1.260554731  | 3.59310441   | -0.818817546 |
|  | ENSORLG00000018132  | -         | -                                                                                     | -3.953722802 | -0.22880615  | 3.493758534  | -0.230673752 |
|  | ENSORLG00000006192  | -         | -                                                                                     | -3.86158352  | 1.529315321  | 7.254204038  | 2.063790421  |
|  | ENSORLG00000001118  | mcts1     | MCTS1, re-initiation and release factor [Source:NCBI gene:Acc:101161648]              | -6.21839691  | 2.23873938   | 7.697541988  | -0.769156762 |
|  | ENSORLG00000012632  | CDH7      | cadherin 7 [Source:HGNC Symbol:Acc:HGNC:1766]                                         | -4.735673382 | -0.441908192 | 2.774193585  | -1.51308552  |
|  | ENSORLG00000017199  |           |                                                                                       |              |              |              |              |

|                     |               |                                                                                                                       |              |              |             |              |
|---------------------|---------------|-----------------------------------------------------------------------------------------------------------------------|--------------|--------------|-------------|--------------|
| ENSRORG00000017147  | bbs5          | Bardet-Biedl syndrome 5 [Source:NCBI gene:Acc:101157654]                                                              | -6.584296987 | 1.943650135  | 12.4488449  | 3.921387551  |
| ENSRORG00000016684  | VSX2          | visual system homeobox 2 [Source:HGNC Symbol:Acc:HGNC:1975]                                                           | -1.350236885 | -1.549134089 | 5.296147199 | 5.495529635  |
| ENSRORG00000009299  | zgc:66426     | zgc:66426 [Source:ZFIN:Acc:ZDB-GENE-04026-1639]                                                                       | 0            | 13.09382192  | 19.9220941  | 6.698959124  |
| ENSRORG00000016146  | msh4          | msh5 homolog 4 [Source:ZFIN:Acc:ZDB-GENE-131121-643]                                                                  | 0.561546634  | 0.386154798  | 3.772979679 | 3.955156258  |
| ENSRORG00000004725  | ift140        | intraflagellar transport 140 homolog (Chlamydomonas) [Source:ZFIN:Acc:ZDB-GENE-040724-165]                            | -0.020701906 | 0.170319542  | 4.27473931  | 4.08690274   |
| ENSRORG000000013017 | iftr8         | intraflagellar transport 88 homolog [Source:ZFIN:Acc:ZDB-GENE-030131-574]                                             | 0.264741962  | 0.76815854   | 4.112688491 | 3.60975596   |
| ENSRORG00000011934  | tctc1         | T-complex associated testis-expressed 1 [Source:ZFIN:Acc:ZDB-GENE-120406-12]                                          | 1.836517773  | 0.31377957   | 4.847309183 | 6.372533337  |
| ENSRORG00000004513  | prnoca        | prerolnocoeptin [Source:NCBI gene:Acc:101186692]                                                                      | 1.933114989  | 0.991706932  | 3.366922527 | 4.308817021  |
| ENSRORG00000011654  | -             | -                                                                                                                     | -1.127506228 | -0.872614008 | 4.005613495 | 3.751206275  |
| ENSRORG00000004725  | sept3         | sepin 3 [Source:ZFIN:Acc:ZDB-GENE-050522-375]                                                                         | 0.671821856  | -0.625976668 | 3.58072954  | 4.879011714  |
| ENSRORG000000012762 | -             | -                                                                                                                     | 2.55524679   | 2.218508434  | 5.263658823 | -            |
| ENSRORG00000004076  | sl:skey-46a10 | sl:skey-46a10 3 [Source:ZFIN:Acc:ZDB-GENE-030131-4610]                                                                | -0.586800341 | 1.853609529  | 6.173900127 | 3.734035241  |
| ENSRORG00000006080  | -             | -                                                                                                                     | 0.560080971  | 0.304174053  | 4.134116774 | 4.390508264  |
| ENSRORG000000014072 | -             | -                                                                                                                     | 1.18794865   | -0.214097663 | 3.012579563 | 4.415105449  |
| ENSRORG000000012477 | ztf11         | leusine zipper transcription factor like 1 [Source:NCBI gene:Acc:101165106]                                           | 0.285854971  | 0.875507081  | 4.892896219 | 4.303728734  |
| ENSRORG000000018223 | -             | -                                                                                                                     | 0            | 11.29023777  | 16.87051868 | 5.585248821  |
| ENSRORG000000017529 | scn3b         | sodium voltage-gated channel beta subunit 3 [Source:NCBI gene:Acc:101164629]                                          | 14.38464482  | 12.8322769   | 3.410833669 | 4.9636672    |
| ENSRORG00000001335  | sl:skey-42p14 | sl:skey-42p14 3 [Source:ZFIN:Acc:ZDB-GENE-041111-131]                                                                 | -11.97260291 | -1.054072011 | 20.62035118 | 9.702305162  |
| ENSRORG00000016407  | -             | -                                                                                                                     | 1.315100963  | -0.681066158 | 3.747690613 | 5.7443427    |
| ENSRORG000000007726 | -             | -                                                                                                                     | -0.39757602  | -0.156802166 | 4.90071004  | -            |
| ENSRORG00000003033  | zgc:66427     | E3 ubiquitin-protein ligase znf1 [Source:NCBI gene:Acc:101166334]                                                     | -0.549315898 | -0.203496295 | 4.2526803   | 3.907345608  |
| ENSRORG000000017409 | caona1e       | calcium channel, voltage-dependent, K type, alpha 1E subunit B [Source:ZFIN:Acc:ZDB-GENE-070705-133]                  | 0.242144928  | 0.810635617  | 3.605541601 | 3.037535892  |
| ENSRORG000000049828 | CCDC112       | coiled-coil domain containing 112 [Source:HGNC Symbol:Acc:HGNC:28599]                                                 | -2.953296883 | -0.12808923  | 3.411101245 | -            |
| ENSRORG00000004608  | arm4          | armadillo repeat containing 4 [Source:ZFIN:Acc:ZDB-GENE-100316-7]                                                     | -0.336768889 | 1.1654084104 | 3.142695567 | 4.460495718  |
| ENSRORG00000007235  | -             | -                                                                                                                     | 13.53958535  | 0            | 4.630191908 | 18.17028916  |
| ENSRORG00000007132  | arh1          | aradine ubiquitin-conjugating enzyme E2 binding protein homolog 1 (Drosophila) [Source:ZFIN:Acc:ZDB-GENE-030131-5213] | 0.526245145  | 0.541486911  | 3.074501429 | 3.059744806  |
| ENSRORG000000021700 | -             | -                                                                                                                     | 1.100257769  | 0.241712931  | 4.298218975 | 5.157248397  |
| ENSRORG00000008365  | -             | -                                                                                                                     | -1.19534526  | -0.33804008  | 6.255172694 | 5.993526863  |
| ENSRORG00000005906  | tmem134       | transmembrane protein 134 [Source:NCBI gene:Acc:101169517]                                                            | -0.745971112 | 0.977371689  | 4.933616318 | 3.210758471  |
| ENSRORG000000021050 | RF0100        | -                                                                                                                     | 2.377666553  | 1.443142445  | 3.171693014 | 6.652699954  |
| ENSRORG000000010213 | -             | -                                                                                                                     | 3.940742887  | 0.615816902  | 3.800546173 | 7.125958452  |
| ENSRORG00000003508  | -             | -                                                                                                                     | 12.31317498  | 12.67468     | 4.339371768 | 3.978336566  |
| ENSRORG000000017615 | pth1ra        | parathyroid hormone 1 receptor A [Source:ZFIN:Acc:ZDB-GENE-991123-8]                                                  | 11.34712304  | 9.791423397  | 4.542381473 | 6.098539988  |
| ENSRORG00000004334  | cfap298       | cilia and flagella associated protein 298 [Source:NCBI gene:Acc:101169629]                                            | -2.197476727 | -0.019007506 | 3.433175021 | -            |
| ENSRORG00000009201  | znf511        | zinc finger protein 511 [Source:NCBI gene:Acc:101171189]                                                              | -0.493164648 | -0.00163964  | 5.11357129  | 4.622531126  |
| ENSRORG00000007763  | mustn1b       | musculoskeletal, embryonic nuclear protein 1b [Source:ZFIN:Acc:ZDB-GENE-111129-2]                                     | 0            | 13.17945351  | 16.31027816 | 3.131296611  |
| ENSRORG000000021118 | -             | -                                                                                                                     | -0.156057164 | -0.441648789 | 4.5884388   | 4.729139915  |
| ENSRORG00000008399  | ppp142        | protein phosphatase 1, regulatory subunit 42 [Source:ZFIN:Acc:ZDB-GENE-040704-43]                                     | -1.055738143 | 1.887134009  | 7.333863104 | 4.391476422  |
| ENSRORG00000004669  | -             | -                                                                                                                     | 6.778002959  | -0.04827005  | 3.912229396 | 10.73899861  |
| ENSRORG00000006542  | btc           | betacellulin, epidermal growth factor family member [Source:ZFIN:Acc:ZDB-GENE-050311-1]                               | 14.80091355  | 12.29606444  | 9.3201227   | 6.437329577  |
| ENSRORG000000016469 | nme8          | NME/NM23 family member 8 [Source:ZFIN:Acc:ZDB-GENE-070410-39]                                                         | 4.206635881  | 2.55733052   | 6.250550423 | 7.904442905  |
| ENSRORG00000009132  | -             | -                                                                                                                     | -0.698185271 | 0.38970061   | 6.071649961 | 4.984248816  |
| ENSRORG000000062403 | sic16a4       | solute carrier family 16, member 4 [Source:ZFIN:Acc:ZDB-GENE-070112-602]                                              | 3.670347415  | 0.785031551  | 3.698988009 | 6.5756672    |
| ENSRORG000000021749 | arfap3        | ADP-ribosylation factor GTPase activating protein 3 [Source:ZFIN:Acc:ZDB-GENE-04026-11]                               | 0.89616073   | 2.834667708  | 6.716326918 | 4.772760304  |
| ENSRORG00000005533  | qub           | IQ motif and ubiquitin domain containing [Source:ZFIN:Acc:ZDB-GENE-110421-1]                                          | 1.455884573  | 0.857970195  | 8.935074066 | 6.621704273  |
| ENSRORG000000015169 | tmem231       | transmembrane protein 231 [Source:NCBI gene:Acc:101188706]                                                            | -0.200312506 | -0.546220963 | 3.633830827 | 3.979778496  |
| ENSRORG00000004757  | gpn4b         | glutathione peroxidase 4b [Source:ZFIN:Acc:ZDB-GENE-030410-3]                                                         | 0.31019425   | 1.26993022   | 4.55303025  | 5.59806138   |
| ENSRORG00000015052  | hamp          | heparin [Source:NCBI gene:Acc:101157971]                                                                              | 2.570589016  | -0.700749257 | 3.12616376  | 6.404439343  |
| ENSRORG00000003910  | sl:skey-183g2 | sl:skey-183g2 10 [Source:ZFIN:Acc:ZDB-GENE-130530-729]                                                                | -0.310273143 | 0.74636364   | 5.021196366 | 3.965047348  |
| ENSRORG00000002011  | -             | -                                                                                                                     | 1.770555238  | -11.02194465 | 9.152983248 | 21.945989974 |
| ENSRORG0000000952   | zgc:110197    | ADP-ribosylation factor like GTPase 3 [Source:NCBI gene:Acc:101172287]                                                | -0.404633673 | -0.388662933 | 3.790240074 | 3.774718193  |
| ENSRORG000000010819 | UBE2H (1 of m | ubiquitin-conjugating enzyme E2 H [Source:NCBI gene:Acc:101163973]                                                    | -0.382590972 | 0.00339525   | 3.55331404  | 3.167818308  |
| ENSRORG000000012324 | lam92a1       | family with sequence similarity 92, member A1 [Source:ZFIN:Acc:ZDB-GENE-048091-123]                                   | 1.228697523  | 0.25415346   | 3.853306026 | 4.808389585  |
| ENSRORG00000003919  | -             | -                                                                                                                     | 0            | 9.620787992  | 15.85480022 | 6.234490692  |
| ENSRORG000000011047 | -             | -                                                                                                                     | 2.21026832   | 0.570144114  | 6.397671424 | 8.038280296  |
| ENSRORG00000006352  | catn2         | cattractin [Source:NCBI gene:Acc:101170769]                                                                           | 0.627285987  | 0.250027435  | 4.342204735 | 4.71997338   |
| ENSRORG0000000870   | -             | -                                                                                                                     | 7.82927681   | 3.94375882   | 9.321329883 | 7.206403695  |
| ENSRORG00000012054  | -             | -                                                                                                                     | 0.623154516  | 0.456609811  | 3.036915653 | 3.20395189   |
| ENSRORG000000011017 | efcab1        | E(F)-hand calcium binding domain 1 [Source:ZFIN:Acc:ZDB-GENE-040914-40]                                               | -2.881476786 | 2.064948774  | 10.61574663 | 5.668906849  |
| ENSRORG000000016634 | -             | -                                                                                                                     | -0.761206984 | 0.002013877  | 4.123773983 | 3.162925506  |

|                     |           |                                                                                                  |              |              |              |              |
|---------------------|-----------|--------------------------------------------------------------------------------------------------|--------------|--------------|--------------|--------------|
| ENSRORG00000000931  | ube2a     | ubiquitin conjugating enzyme E2 A [Source:NCBI gene:Acc:101158032]                               | -3.438124818 | 2.957552634  | 5.749674532  | -0.645517655 |
| ENSRORG00000003488  | -         | cell death activator CIDE-A [Source:NCBI gene:Acc:101159391]                                     | -3.910928009 | -0.424786265 | 1.008821655  | -2.476905729 |
| ENSRORG00000005841  | C18orf32  | chromosome 18 open reading frame 32 [Source:HGNC Symbol:Acc:HGNC:31639]                          | -6.07092275  | 2.019765498  | 8.906289512  | 0.116722805  |
| ENSRORG00000004680  | glo4a     | glucosylase domain containing 4 [Source:ZFIN:Acc:ZDB-GENE-040912-38]                             | -5.617867491 | 0.105636914  | -            | 0.932908114  |
| ENSRORG000000003701 | zgc:11418 | cytosolic non-specific dipeptidase [Source:NCBI gene:Acc:101170951]                              | -4.163897514 | -2.662538746 | 0.631461672  | -0.869405582 |
| ENSRORG00000017885  | casq2     | calcastrin 2 [Source:ZFIN:Acc:ZDB-GENE-010724-12]                                                | -4.471492774 | -2.299717685 | 0.458633737  | -1.712654728 |
| ENSRORG000000099727 | -         | -                                                                                                | -3.772223707 | -0.452373088 | 1.25164161   | -2.06772409  |
| ENSRORG00000007765  | sat2b     | sinuate acetyltransferase 2 [Source:NCBI gene:Acc:10174286]                                      | -3.296000119 | -0.424552389 | 4.231018517  | 1.36005591   |
| ENSRORG00000011383  | coa3a     | cytochrome C oxidase assembly factor 3a [Source:ZFIN:Acc:ZDB-GENE-060810-187]                    | -3.387111035 | 0.808952363  | 3.400520672  | -0.795057775 |
| ENSRORG00000007712  | gnt6tq    | N-acetylglucosaminyl-1-phosphate transferase, gamma subunit [Source:ZFIN:Acc:ZDB-GENE-040625-10] | -7.845821223 | 1.943314541  | 8.0268977    | -1.761747927 |
| ENSRORG000000015856 | lflph     | LLP homolog, long-term synaptic facilitation factor [Source:NCBI gene:Acc:101155243]             | -6.921208465 | 0.374877684  | 6.991446606  | -0.304152446 |
| ENSRORG00000017208  | ssb       | Sjogren syndrome antigen B (autoantigen Ia) [Source:ZFIN:Acc:ZDB-GENE-030131-223]                | -5.254284324 | 0.67864917   | 5.641611282  | -0.290837535 |
| ENSRORG00000002158  | map2k5    | mitogen-activated protein kinase kinase 5 [Source:ZFIN:Acc:ZDB-GENE-030131-1517]                 | -3.671367975 | 0.816420603  | 5.373646548  | 0.886243155  |
| ENSRORG00000006235  | usp39     | ubiquitin specific peptidase 39 [Source:NCBI gene:Acc:101161161]                                 | -3.323488914 | 0.400787331  | 3.508616851  | -0.251174444 |
| ENSRORG00000006428  | -         | -                                                                                                | -3.202724475 | 0.947206398  | 4.608335358  | 0.493435358  |
| ENSRORG00000001829  | -         | -                                                                                                | -3.393178298 | -0.777565401 | 3.68877735   | 1.083649278  |
| ENSRORG000000010497 | lysm2d3   | lysoM, putative peptidoglycan-binding domain containing 3 [Source:ZFIN:Acc:ZDB-GENE-048265-88]   | -3.380152139 | 0.818011717  | 3.787039986  | -0.414694359 |
| ENSRORG00000001527  | zgc:16283 | zgc:16283 [Source:ZFIN:Acc:ZDB-GENE-070410-94]                                                   | -3.471214014 | -0.036576632 | 3.202079273  | -0.233073201 |
| ENSRORG00000003929  | HABP4     | hyaluronan binding protein 4 [Source:HGNC Symbol:Acc:HGNC:17062]                                 | -4.174189408 | -0.42039475  | 0.97189114   | -2.771720695 |
| ENSRORG000000014666 | gabrb1b   | gamma-aminobutyric acid (GABA) B receptor, 1b [Source:ZFIN:Acc:ZDB-GENE-060503-5]                | -4.424658843 | -2.781742158 | -0.466940671 | -2.10937420  |
| ENSRORG00000009433  | rgbr      | RPE-retinal G protein-coupled receptor [Source:NCBI gene:Acc:101162976]                          | -4.684056218 | -0.357946103 | 2.671080581  | -1.65445177  |
| ENSRORG000000014721 | -         | chromosome 9 C12orf43 homolog [Source:NCBI gene:Acc:101165894]                                   | -5.031956492 | -0.549912421 | 4.035141749  | -0.446417271 |
| ENSRORG000000013967 | -         | -                                                                                                | -3.31084564  | -0.641849584 | 4.419355749  | 1.750481063  |
| ENSRORG000000012944 | -         | -                                                                                                | -3.72825516  | -0.296142497 | 2.899125366  | -0.532501652 |
| ENSRORG000000021421 | RF0019    | U6atac minor spliceosomal RNA [Source:NCBI gene:Acc:11947495]                                    | -4.683410599 | 0.817586989  | 7.167127298  | 1.666614866  |
| ENSRORG000000040878 | ubif51    | ubiquitin family domain containing 1 [Source:NCBI gene:Acc:101171431]                            | -4.132480774 | 0.924475632  | 6.527780575  | 1.471308909  |
| ENSRORG000000014031 | chnp1r1   | CTD nuclear envelope phosphatase 1 regulatory subunit 1 [Source:NCBI gene:Acc:101165466]         | -4.147202646 | 1.845014307  | 5.824578665  | -0.165153228 |
| ENSRORG00000001006  | rbm48     | RNA binding motif protein 48 [Source:NCBI gene:Acc:101176098]                                    | -0.062007955 | -0.243920876 | 4.902492911  | 1.086629565  |
| ENSRORG000000004347 | tas1r2a   | Tas1ras taste receptor, type 1, member 2a (tas1r2a), mRNA [Source:RefSeq mRNA:Acc:NM_01104858]   | -3.813760597 | 1.408498676  | 5.434345672  | -0.21151537  |
| ENSRORG00000001898  | -         | -                                                                                                | -3.18742742  | 1.217332691  | 3.774341127  | -0.590324086 |
| ENSRORG00000002592  | -         | Golg SNAP receptor complex member 1 [Source:NCBI gene:Acc:101157988]                             | -8.081337151 | 1.31166072   | 9.097291507  | -0.295271726 |
| ENSRORG000000013767 | -         | putative uncharacterized protein DB_G0292636 [Source:NCBI gene:Acc:105355500]                    | -6.256697895 | 1.029562983  | 5.668071339  | -1.599854045 |
| ENSRORG00000002580  | sich211   | chromosome 9 C2orf39 homolog [Source:NCBI gene:Acc:10172921]                                     | -4.057638405 | 1.690231443  | 4.91926164   | -0.8281265   |
| ENSRORG00000004675  | -         | -                                                                                                | -6.309527962 | 1.137190208  | 7.322873781  | -0.358070985 |
| ENSRORG000000014415 | -         | -                                                                                                | -4.161510721 | -0.618942451 | 1.98376386   | -1.558314405 |
| ENSRORG000          |           |                                                                                                  |              |              |              |              |

|  |                    |                                                                      |                                                                                                    |              |              |             |             |
|--|--------------------|----------------------------------------------------------------------|----------------------------------------------------------------------------------------------------|--------------|--------------|-------------|-------------|
|  | ENSRGL0000000159   | -                                                                    | -                                                                                                  | 0.31050588   | -0.93297655  | 4.45968489  | 5.70370054  |
|  | ENSRGL0000000197   | -                                                                    | -                                                                                                  | 13.6810216   | 9.22032955   | 5.78732944  | 10.0356913  |
|  | ENSRGL00000015603  | lam102ba                                                             | protein FAM102B [Source:NCBI gene:Acc:101166419]                                                   | 2.036688775  | 0.66969592   | 3.55871754  | 4.90397582  |
|  | ENSRGL00000020217  | -                                                                    | -                                                                                                  | 0.584727379  | 1.81672123   | 4.134714649 | 3.082761268 |
|  | ENSRGL00000009043  | mon5                                                                 | MORF repeat containing 5 [Source:ZFIN:Acc:ZDB-GENE-050522-267]                                     | 0            | 0            | 18.94431738 | 18.94431738 |
|  | ENSRGL00000004695  | -                                                                    | -                                                                                                  | 1.163779148  | 0.800414452  | 4.201015286 | 4.564664918 |
|  | OSCP1              | organic solute carrier partner 1 [Source:HGNC Symbol:Acc:HGNC:29971] | -                                                                                                  | -0.94527191  | 0.093740282  | 4.592802992 | 3.5542755   |
|  | ENSRGL00000000020  | -                                                                    | -                                                                                                  | -0.57465548  | 0.05245516   | 4.47567656  | 3.849050267 |
|  | ENSRGL00000017939  | rsph3                                                                | retinal-specific homeobox 3 [Source:ZFIN:Acc:ZDB-GENE-040724-173]                                  | 1.821241038  | 0.936289167  | 4.572945405 | 5.45640211  |
|  | ENSRGL000000008557 | -                                                                    | -                                                                                                  | 0.806834729  | -2.811101654 | 9.248522133 | 12.86694307 |
|  | ENSRGL000000007896 | zrom1b                                                               | prominin 1 b [Source:ZFIN:Acc:ZDB-GENE-031003-1]                                                   | 0.378517559  | 0.450681635  | 3.53094735  | 3.459268516 |
|  | ENSRGL00000007164  | -                                                                    | -                                                                                                  | 0.224064101  | 0.256765322  | 4.53659513  | 4.48478542  |
|  | ENSRGL00000009553  | MNS1                                                                 | meiosis specific nuclear structural 1 [Source:HGNC Symbol:Acc:HGNC:29636]                          | -2.239907802 | -0.506634974 | 5.102818936 | 3.730028963 |
|  | ENSRGL00000010076  | -                                                                    | -                                                                                                  | 2.1104091    | 0            | 11.99420845 | 16.63987201 |
|  | ENSRGL000000008450 | -                                                                    | -                                                                                                  | 1.793801899  | 0.86603511   | 3.84082492  | 4.748304444 |
|  | ENSRGL00000001688  | tecb1                                                                | tectorin beta [Source:ZFIN:Acc:ZDB-GENE-041212-16]                                                 | -1.233666339 | 0.854263778  | 5.395573147 | 3.508127803 |
|  | ENSRGL000000020999 | RF00003                                                              | U1 splicesome RNA [Source:NCBI gene:Acc:111948514]                                                 | 1.990528415  | 0.532064119  | 3.219579421 | 4.45528283  |
|  | ENSRGL000000021355 | RF00012                                                              | small nuclear RNA U2 [Source:NCBI gene:Acc:111946355]                                              | -12.65261197 | -0.121419746 | 17.01274702 | 4.68907477  |
|  | ENSRGL000000017136 | zpc-172182                                                           | zpc172182 [Source:ZFIN:Acc:ZDB-GENE-080204-56]                                                     | -9.529664802 | 3.64313555   | 19.10147557 | 5.929166677 |
|  | ENSRGL000000008450 | -                                                                    | -                                                                                                  | 1.84075735   | -0.317073151 | 4.22366395  | 6.381981512 |
|  | ENSRGL000000021640 | -                                                                    | -                                                                                                  | 2.568272861  | 2.613184171  | 4.483789019 | 4.439336116 |
|  | ENSRGL000000009343 | drc3                                                                 | dymin regulatory complex subunit 3 [Source:ZFIN:Acc:ZDB-GENE-061103-349]                           | 0            | 11.22629778  | 17.93947346 | 6.713513562 |
|  | ENSRGL000000013037 | sacs                                                                 | sacsin molecular chaperone [Source:NCBI gene:Acc:101168896]                                        | 0.786191277  | 3.324219386  | 6.032586443 | 3.495051123 |
|  | ENSRGL000000009063 | trtp13                                                               | thyroid hormone receptor interactor 13 [Source:ZFIN:Acc:ZDB-GENE-040226-1498]                      | 0.318856836  | 0.75642516   | 4.041475641 | 3.605174939 |
|  | ENSRGL00000012827  | -                                                                    | -                                                                                                  | 1.210669368  | 0.891890323  | 3.048933746 | 3.368198014 |
|  | ENSRGL00000007856  | -                                                                    | -                                                                                                  | 1.233239618  | 0.072014696  | 3.682082056 | 4.843791854 |
|  | ENSRGL000000015988 | nek4                                                                 | NIMA-related kinase 4 [Source:ZFIN:Acc:ZDB-GENE-040426-1392]                                       | -0.975977483 | -0.681514919 | 4.052614458 | 3.758636986 |
|  | ENSRGL000000021250 | -                                                                    | -                                                                                                  | -1.400925531 | 0.573777138  | 5.106348957 | 3.132133011 |
|  | ENSRGL000000021612 | -                                                                    | -                                                                                                  | 2.451518607  | -0.048252502 | 3.447879318 | 5.94813574  |
|  | ENSRGL000000013926 | -                                                                    | -                                                                                                  | 1.030672941  | -0.287152268 | 3.560636356 | 4.87439673  |
|  | ENSRGL000000014620 | dna11                                                                | dymin, axonemal, light intermediate chain 1 [Source:ZFIN:Acc:ZDB-GENE-080204-7]                    | -1.00094084  | 1.558267693  | 9.846190775 | 7.287461397 |
|  | ENSRGL000000004754 | tmcb6                                                                | transmembrane and coiled-coil domains 6 [Source:ZFIN:Acc:ZDB-GENE-070410-47]                       | -0.272946713 | 0.02296856   | 3.326318877 | 3.03890033  |
|  | ENSRGL00000003871  | ccna1                                                                | cyclin A1 [Source:ZFIN:Acc:ZDB-GENE-040311-2]                                                      | -0.487220831 | -0.742218655 | 5.52952156  | 5.58059095  |
|  | ENSRGL000000004911 | ttf9                                                                 | tubulin tyrosinase ligase-like family, member 9 [Source:ZFIN:Acc:ZDB-GENE-030131-1582]             | -0.710696304 | 0.858921915  | 6.612904182 | 5.522770089 |
|  | ENSRGL000000021030 | RF00004                                                              | U2 splicesome RNA [Source:NCBI gene:Acc:101194851]                                                 | -0.987374748 | 0.513139111  | 7.595025318 | 6.095002041 |
|  | ENSRGL000000013495 | -                                                                    | -                                                                                                  | 4.366192483  | 2.120276279  | 4.994262279 | 6.220721502 |
|  | ENSRGL000000017096 | -                                                                    | -                                                                                                  | -3.078541521 | -0.979563387 | 6.350307317 | 4.051814748 |
|  | ENSRGL000000009082 | utp2                                                                 | uncoupling protein 2 [Source:NCBI gene:Acc:101160682]                                              | 5.815893103  | -0.32550341  | 3.699697217 | 9.84159607  |
|  | ENSRGL00000007822  | -                                                                    | -                                                                                                  | 11.32483872  | 12.7857573   | 5.524704315 | 4.064234248 |
|  | ENSRGL000000015702 | -                                                                    | -                                                                                                  | 0.889404261  | 0.910846835  | 3.27979793  | 3.258940022 |
|  | ENSRGL000000008483 | mon3                                                                 | MORF repeat containing 3 [Source:ZFIN:Acc:ZDB-GENE-050417-152]                                     | -0.81323479  | 0.465053944  | 7.226097333 | 5.948293596 |
|  | ENSRGL00000001334  | -                                                                    | -                                                                                                  | 0.878810976  | 2.797289206  | 6.02040534  | 4.10411038  |
|  | ENSRGL000000014836 | zsp16                                                                | zinc finger protein 16 [Source:ZFIN:Acc:ZDB-GENE-050522-70]                                        | 0.223480641  | 1.149608261  | 7.03112016  | 6.10547711  |
|  | ENSRGL000000016854 | kss1rb                                                               | RGS1 receptor b [Source:ZFIN:Acc:ZDB-GENE-060526-54]                                               | 12.14012996  | 12.34226361  | 3.862205234 | 3.666042046 |
|  | ENSRGL000000009694 | CLUAP1                                                               | clustering associated protein 1 [Source:HGNC Symbol:Acc:HGNC:19009]                                | -1.694313096 | -0.37951079  | 5.774624704 | 4.460147765 |
|  | ENSRGL00000005660  | -                                                                    | -                                                                                                  | 1.454204853  | 3.763060696  | 5.72745484  | 3.41907971  |
|  | ENSRGL000000014489 | -                                                                    | -                                                                                                  | -1.041668875 | 0.453453646  | 4.815782337 | 3.321146826 |
|  | ENSRGL000000011051 | nlcn                                                                 | sodium leak channel, non-selective [Source:ZFIN:Acc:ZDB-GENE-050410-12]                            | 2.173951653  | 2.004268632  | 3.042129171 | 3.212298262 |
|  | ENSRGL000000017932 | -                                                                    | -                                                                                                  | -9.875810774 | 4.295465836  | 17.60951734 | 3.438728588 |
|  | ENSRGL000000012981 | efhc1                                                                | EF-hand domain (C-terminal) containing 1 [Source:ZFIN:Acc:ZDB-GENE-040426-1300]                    | 4.229684936  | 1.124045312  | 8.405610092 | 11.51157823 |
|  | ENSRGL000000005555 | -                                                                    | -                                                                                                  | 0.072154876  | -0.42755535  | 3.457801588 | 6.95230084  |
|  | ENSRGL000000000161 | -                                                                    | -                                                                                                  | -1.165066662 | 1.722804914  | 6.048068079 | 3.10686563  |
|  | ENSRGL000000006061 | sid1ey-14o18                                                         | sid1ey-14o18 2 [Source:NCBI gene:Acc:101164594]                                                    | -1.06340819  | 2.220457567  | 8.387651614 | 5.48280606  |
|  | ENSRGL00000007690  | -                                                                    | -                                                                                                  | -1.169502716 | -0.216071301 | 5.138044098 | 4.185102418 |
|  | ENSRGL000000050714 | slc2a5                                                               | solute carrier family 2, facilitated glucose transporter member 5 [Source:NCBI gene:Acc:101154948] | 3.56852988   | -0.943998138 | 3.157638038 | 7.670655102 |
|  | ENSRGL00000003981  | enrh3                                                                | glutamate-rich 3 [Source:ZFIN:Acc:ZDB-GENE-070209-29]                                              | 1.69371755   | -2.2857895   | 3.645243413 | 7.62561268  |
|  | ENSRGL000000010918 | ak7b                                                                 | serine/threonine kinase 7b [Source:ZFIN:Acc:ZDB-GENE-050309-170]                                   | 3.685825925  | 0.492212194  | 3.643056036 | 6.837156587 |
|  | ENSRGL000000011039 | FT122                                                                | intraflagellar transport 122 [Source:HGNC Symbol:Acc:HGNC:13566]                                   | -0.156911048 | -0.229689664 | 4.077102436 | 4.150366182 |
|  | ENSRGL000000006044 | syntpb2                                                              | synaptophysin-like 2b [Source:ZFIN:Acc:ZDB-GENE-050417-309]                                        | 0.760702566  | 1.781258257  | 4.70460318  | 3.68453787  |
|  | ENSRGL000000011792 | daw1                                                                 | dymin assembly factor with WDR repeat domains 1 [Source:ZFIN:Acc:ZDB-GENE-050419-255]              | 4.91849904   | -0.99634353  | 4.226286852 | 10.14189956 |
|  | ENSRGL000000015815 | ttb1                                                                 | intraflagellar transport 81 [Source:NCBI gene:Acc:101160565]                                       | 0.810257298  | -0.158306322 | 3.288033453 | 4.257081954 |
|  | ENSRGL000000005637 | -                                                                    | -                                                                                                  | 3.767234039  | 1.818275975  | 4.017994863 | 6.057432265 |
|  | ENSRGL000000012755 | -                                                                    | -                                                                                                  | 10.2481885   | 0            | 6.1803845   | 16.56670874 |
|  | ENSRGL00000002502  | slc1h211-220a                                                        | enkurin domain containing 1 [Source:HGNC Symbol:Acc:HGNC:29246]                                    | 1.37949899   | -1.71926599  | 4.564095918 | 7.114457567 |
|  | ENSRGL000000003997 | nm1k                                                                 | NM1 serine/threonine protein kinase [Source:NCBI gene:Acc:101164566]                               | 1.278452273  | 1.196642742  | 3.08399321  | 3.165986959 |

|  |                    |             |                                                                                                          |              |              |              |              |
|--|--------------------|-------------|----------------------------------------------------------------------------------------------------------|--------------|--------------|--------------|--------------|
|  | ENSRGL000000016473 | ACYP1       | acetylcholinesterase 1 [Source:HGNC Symbol:Acc:HGNC:29075]                                               | -3.181482253 | 2.62546649   | 3.899657859  | -1.909485036 |
|  | ENSRGL000000005814 | rap1ab      | RAP1A, member of RAS oncogene family b [Source:ZFIN:Acc:ZDB-GENE-040426-2788]                            | -3.031272539 | -0.347636391 | 2.053703067  | -0.629448093 |
|  | ENSRGL000000002759 | fho43       | F-box protein 43 [Source:ZFIN:Acc:ZDB-GENE-040426-1645]                                                  | -3.678816419 | -0.03530022  | 2.649023681  | 1.049841107  |
|  | ENSRGL00000001338  | HIST2H3A    | histone H3 [Source:NCBI gene:Acc:101166976]                                                              | -3.793674607 | -1.387693529 | 3.677945037  | 3.744784019  |
|  | ENSRGL000000009123 | cyf5b       | cytochrome b5 [Source:NCBI gene:Acc:101155988]                                                           | -3.345407267 | 0.847491714  | 4.440744474  | 0.248303212  |
|  | ENSRGL000000008191 | -           | -                                                                                                        | -3.145495667 | 0.239697819  | 2.412218788  | -0.861543984 |
|  | ENSRGL000000000334 | usp16       | ubiquitin specific peptidase 16 [Source:ZFIN:Acc:ZDB-GENE-030131-4153]                                   | -4.856042031 | 0.040521248  | 3.503443103  | -1.392674796 |
|  | ENSRGL000000000041 | churc1      | churchill domain containing 1 [Source:NCBI gene:Acc:101169830]                                           | -4.417916163 | 0.175736439  | 2.445834726  | -2.147329246 |
|  | ENSRGL000000012430 | trapp2      | trafficking protein particle complex 2 [Source:NCBI gene:Acc:101168660]                                  | -6.583393728 | 1.254262871  | 8.448592611  | 0.613614241  |
|  | ENSRGL00000000789  | -           | -                                                                                                        | -4.8543273   | 2.895500076  | 7.335405651  | -0.418989020 |
|  | ENSRGL00000007788  | -           | -                                                                                                        | -3.649263022 | 0.866343588  | 5.15518323   | 6.38063144   |
|  | ENSRGL000000012083 | -           | -                                                                                                        | -15.99427034 | -2.26476892  | 11.8606199   | -2.08831187  |
|  | ENSRGL000000014903 | -           | -                                                                                                        | -4.072724479 | -1.631343428 | -0.229308289 | -2.66938852  |
|  | ENSRGL000000008134 | -           | -                                                                                                        | -0.09602473  | -4.658950663 | 5.038062075  | 0.275641072  |
|  | ENSRGL00000007964  | tsan3a      | tetraspanin-3 [Source:NCBI gene:Acc:101170088]                                                           | -0.908013959 | -4.494222295 | -2.35494075  | 1.412580758  |
|  | ENSRGL000000009825 | -           | -                                                                                                        | -1.891497115 | -3.505958203 | -2.445596272 | 2.063144902  |
|  | ENSRGL000000006632 | FAM189A     | family with sequence similarity 189 member A1 [Source:HGNC Symbol:Acc:HGNC:29075]                        | -2.835776305 | -16.04110127 | 0.032521316  | 13.23835547  |
|  | ENSRGL000000011838 | slc2a3b     | solute carrier family 2 (facilitated glucose transporter), member 3b [Source:ZFIN:Acc:ZDB-GENE-121031-5] | -2.541991047 | -5.251484045 | 1.944097701  | 4.64507948   |
|  | ENSRGL000000000717 | -           | -                                                                                                        | 0.39045508   | -4.181440695 | -0.78107236  | 3.791380171  |
|  | ENSRGL000000011521 | -           | -                                                                                                        | 0.904684098  | -3.807140313 | 0.323245054  | 5.054366193  |
|  | ENSRGL000000005501 | pqb5        | pqb5/acy transposable element derived 5 [Source:ZFIN:Acc:ZDB-GENE-040724-229]                            | -0.4097947   | -3.621949237 | -3.621949237 | 2.791152923  |
|  | ENSRGL000000004294 | acot7       | acyl-CoA thioesterase 7 [Source:ZFIN:Acc:ZDB-GENE-040912-42]                                             | -1.732594801 | -4.052708945 | -0.470202484 | 1.850286547  |
|  | ENSRGL000000005598 | zmp000a     | -                                                                                                        | -2.267420263 | -3.067427995 | -0.285453259 | 5.015054934  |
|  | ENSRGL000000013178 | -           | -                                                                                                        | 1.068319922  | -3.755262386 | -0.944942706 | 3.230125288  |
|  | ENSRGL00000002388  | -           | -                                                                                                        | 0.965405977  | -4.69465389  | -0.673202562 | 4.787343689  |
|  | ENSRGL000000004876 | nos1        | nitric oxide synthase domain containing 1 protein [Source:ZFIN:Acc:ZDB-GENE-061013-657]                  | -2.47047724  | -3.470149527 | -2.47047724  | 3.49250276   |
|  | ENSRGL00000006655  | -           | -                                                                                                        | -2.518102759 | -16.6171021  | -1.585535651 | 17.51397427  |
|  | ENSRGL000000001687 | psat1       | phosphoserine aminotransferase 1 [Source:ZFIN:Acc:ZDB-GENE-030131-5723]                                  | -0.42180302  | -4.77349896  | -1.297272038 | 3.055301410  |
|  | ENSRGL000000008963 | ABHD12B     | ABHD12B, rhodopsin domain containing 12B [Source:HGNC Symbol:Acc:HGNC:19837]                             | 1.149024615  | -6.067029379 | -1.888212708 | 3.52822454   |
|  | ENSRGL000000015862 | htr1fb      | 5-hydroxytryptamine (serotonin) receptor 1fb [Source:ZFIN:Acc:ZDB-GENE-090312-140]                       | -2.250652079 | -3.29552071  | 0.517633642  | 1.562944082  |
|  | ENSRGL000000014604 | sich211     | -                                                                                                        | -1.366529801 | -4.960573226 | -4.960573226 | 2.28741998   |
|  | ENSRGL000000015028 | -           | -                                                                                                        | 3.993017468  | -1.301421806 | -3.37067352  | 1.92451241   |
|  | ENSRGL000000002997 | fbp1a (1)   | fructose-1,6-bisphosphatase 1 [Source:NCBI gene:Acc:101156922]                                           | 6.014616333  | 0.098184466  | -4.298067133 | 1.626233741  |
|  | ENSRGL000000006776 | sidkey-24   | endonuclease domain-containing 1 protein [Source:NCBI gene:Acc:101189485]                                | 5.76397077   | 0.108113808  | 5.156190978  | 5.099784205  |
|  | ENSRGL000000005025 | -           | -                                                                                                        | 5.614213954  | 1.399202546  | -4.235434948 | 1.011263403  |
|  | ENSRGL000000013422 | ARG1        | arginase 1 [Source:HGNC Symbol:Acc:HGNC:663]                                                             | 8.21032669   | 0.792388995  | -5.797585446 | 0.838700314  |
|  | ENSRGL000000005655 | ampd1       | adenosine monophosphate deaminase 1 [Source:NCBI gene:Acc:10112409]                                      | 5.667454005  | 0.048686339  | -3.071647635 | 2.584943599  |
|  | ENSRGL000000013959 | apocornet1a | apolipoprotein A-I [Source:NCBI gene:Acc:101161189]                                                      | 7.037270794  | 0.246122574  | -3.          |              |

|  |                     |                 |                                                                                                                                            |              |               |             |             |
|--|---------------------|-----------------|--------------------------------------------------------------------------------------------------------------------------------------------|--------------|---------------|-------------|-------------|
|  | ENSRGLG00000003807  | wap65-like      | Oryzias latipes warm-temperature-acclimation-related-65 kDa protein-like protein (wap65-like), mRNA [Source:RefSeq; mRNA Acc:NM_001104852] | -1.898528422 | -1.991386008  | 6.989099967 | 7.082441543 |
|  | ENSRGLG00000007791  | 43br91          | membrane-associated ring finger (CHC4) 1 [Source:ZFIN; Acc:ZDB-GENE-081112-1]                                                              | 0.829595654  | 0.750319243   | 3.066060424 | 3.145819053 |
|  | ENSRGLG00000002971  | -               | -                                                                                                                                          | 0.513226489  | 0.94928842    | 4.829559346 | 4.394005778 |
|  | ENSRGLG00000005868  | ano9a           | anoctamin 9a [Source:ZFIN; Acc:ZDB-GENE-071004-46]                                                                                         | 11.69874373  | 12.37676301   | 4.805098925 | 4.12754752  |
|  | ENSRGLG00000006992  | ttc21b          | tetratricopeptide repeat domain 21B [Source:ZFIN; Acc:ZDB-GENE-031010-34]                                                                  | -1.691201205 | -0.788444288  | 3.960611225 | 3.058339077 |
|  | ENSRGLG00000004379  | sic211-272n     | protein kinase cAMP-dependent type II regulatory subunit beta [Source:HGNC; Symbol:AC:HGNC:8332]                                           | 3.430205847  | 2.319587192   | 3.002107207 | 3.11213516  |
|  | ENSRGLG00000002225  | mf212b          | sic211-10b2.1 [Source:ZFIN; Acc:ZDB-GENE-070913-9]                                                                                         | -3.55453559  | -0.614236519  | 6.736306663 | 3.82399557  |
|  | ENSRGLG00000004674  | dync2ii1        | dyncin cytoplasmic 2, light intermediate chain 1 [Source:ZFIN; Acc:ZDB-GENE-040426-129]                                                    | -0.138596769 | -0.425663618  | 4.647037912 | 4.647037912 |
|  | ENSRGLG00000002440  | npy2ii          | neuropeptide Y receptor 2Y, like [Source:ZFIN; Acc:ZDB-GENE-111115-4]                                                                      | 1.284922139  | 1.398631731   | 4.8424896   | 4.738260021 |
|  | ENSRGLG00000000792  | ten1            | TEN1 C57 complex subunit [Source:ZFIN; Acc:ZDB-GENE-030131-8755]                                                                           | 0.025953957  | 0.515874327   | 4.172529167 | 3.683093983 |
|  | ENSRGLG00000009047  | -               | -                                                                                                                                          | -3.700568845 | -0.03853596   | 8.12678022  | 4.464732001 |
|  | ENSRGLG00000009795  | -               | -                                                                                                                                          | 0            | 10.38730653   | 18.42067281 | 8.033785773 |
|  | ENSRGLG00000000448  | -               | -                                                                                                                                          | -0.176824293 | 0.956395665   | 4.33451951  | 3.594484323 |
|  | ENSRGLG000000021693 | -               | -                                                                                                                                          | 1.906640528  | 4.003648961   | 6.55793137  | 4.461407885 |
|  | ENSRGLG000000012963 | -               | -                                                                                                                                          | 2.250530739  | 1.841975347   | 6.367800066 | 4.016718558 |
|  | ENSRGLG000000010576 | cerkl           | ceramide kinase-like [Source:ZFIN; Acc:ZDB-GENE-070410-38]                                                                                 | -0.024988177 | -1.107430563  | 3.258207753 | 4.341139532 |
|  | ENSRGLG00000001896  | katnal2         | katanin p60 subunit A-like 2 [Source:ZFIN; Acc:ZDB-GENE-051113-156]                                                                        | -0.711129247 | 0.0639032     | 4.948037276 | 4.173489926 |
|  | ENSRGLG000000011467 | -               | -                                                                                                                                          | 0.999306812  | -0.438081634  | 4.44252685  | 5.880402296 |
|  | ENSRGLG000000013742 | efhc2           | EF-hand domain (C-terminal) containing 2 [Source:ZFIN; Acc:ZDB-GENE-031001-10]                                                             | 4.82949192   | 0.020250707   | 5.587154246 | 10.39147865 |
|  | ENSRGLG000000012783 | -               | -                                                                                                                                          | 1.407894227  | -1.464525781  | 3.895284964 | 6.768190305 |
|  | ENSRGLG000000012009 | -               | -                                                                                                                                          | -0.92266425  | 2.94634703    | 7.587582243 | 6.02738942  |
|  | ENSRGLG00000005615  | cock181         | coiled-coil domain containing 181 [Source:ZFIN; Acc:ZDB-GENE-060503-312]                                                                   | 2.618839687  | 1.22064028    | 3.865515167 | 5.264236964 |
|  | ENSRGLG000000012090 | -               | -                                                                                                                                          | 0            | 10.65611198   | 15.794607   | 5.399778875 |
|  | ENSRGLG000000016424 | fem167ab        | family with sequence similarity 167 member A [Source:NCBI; gene:Acc:101170388]                                                             | 0.112859029  | -0.7127359828 | 3.103275323 | 3.951031735 |
|  | ENSRGLG000000016905 | fmin1           | formin 1 [Source:HGNC; Symbol:AC:HGNC:3788]                                                                                                | 0.43927741   | 0.151323871   | 3.407935691 | 3.696374332 |
|  | ENSRGLG000000010421 | -               | -                                                                                                                                          | 0            | 11.75305793   | 16.41598433 | 4.66340222  |
|  | ENSRGLG000000009960 | -               | -                                                                                                                                          | 11.30538919  | 0             | 4.91560692  | 16.22148706 |
|  | ENSRGLG000000007306 | -               | -                                                                                                                                          | -1.334939991 | 0.894959164   | 6.21795665  | 3.988542319 |
|  | ENSRGLG000000006851 | ropn1l          | rhophilin associated tail protein 1-like [Source:ZFIN; Acc:ZDB-GENE-040724-235]                                                            | 4.065172602  | 1.785880802   | 4.777494308 | 5.07268149  |
|  | ENSRGLG00000005163  | lgl1b           | leucine-rich glioma inactivated 1b [Source:ZFIN; Acc:ZDB-GENE-060217-1]                                                                    | 3.932469742  | 1.536715183   | 3.385360391 | 5.761605293 |
|  | ENSRGLG000000012850 | odf2            | outer dense fiber protein 2 [Source:NCBI; gene:Acc:101172288]                                                                              | 1.48835769   | -0.061003116  | 3.28893416  | 4.839679735 |
|  | ENSRGLG000000010401 | PCGF3           | polycomb group ring finger 3 [Source:NCBI; gene:Acc:10117923]                                                                              | 0.610225913  | 0.29974326    | 3.346539554 | 4.365395954 |
|  | ENSRGLG000000009021 | lrrc18a         | leucine rich repeat containing 18a [Source:ZFIN; Acc:ZDB-GENE-090313-323]                                                                  | 0            | 12.39123553   | 19.14544939 | 6.75468642  |
|  | ENSRGLG00000007321  | ELMOD2          | ELMO domain containing 2 [Source:HGNC; Symbol:AC:HGNC:28111]                                                                               | 0.622985923  | 1.445724716   | 4.597894724 | 3.77601518  |
|  | ENSRGLG000000008354 | myzap           | myocardial zonula adherens protein [Source:ZFIN; Acc:ZDB-GENE-041111-91]                                                                   | -0.504952683 | -0.31460266   | 3.655790894 | 3.655790894 |
|  | ENSRGLG000000016142 | ankle1a         | ankyrin repeat and EF-hand domain containing 1a [Source:ZFIN; Acc:ZDB-GENE-041001-196]                                                     | 2.964870961  | 0.110836092   | 3.155961116 | 6.010481216 |
|  | ENSRGLG000000016026 | zfp110366       | zfp110366 [Source:ZFIN; Acc:ZDB-GENE-050417-302]                                                                                           | 0.789167075  | 1.832760627   | 4.53857215  | 3.495467217 |
|  | ENSRGLG00000001899  | ccdc40          | coiled-coil domain containing 40 [Source:ZFIN; Acc:ZDB-GENE-060503-723]                                                                    | -0.603262786 | -1.683994214  | 3.983397427 | 5.064613922 |
|  | ENSRGLG00000009699  | KIAA1549l       | KIAA1549 like [Source:HGNC; Symbol:AC:HGNC:24838]                                                                                          | -0.164698957 | -0.88680876   | 3.78327998  | 4.51588251  |
|  | ENSRGLG000000017613 | -               | -                                                                                                                                          | 0            | 11.37427334   | 17.84422125 | 6.470422944 |
|  | ENSRGLG000000007096 | rfsank          | regulatory factor X-associated ankyrin-containing protein [Source:ZFIN; Acc:ZDB-GENE-050208-596]                                           | -0.019193591 | 0.080758376   | 3.108415572 | 3.008948223 |
|  | ENSRGLG000000010634 | -               | -                                                                                                                                          | 1.206772076  | -0.898087263  | 3.817272748 | 5.922616732 |
|  | ENSRGLG000000016572 | IFT43           | intraflagellar transport 43 [Source:HGNC; Symbol:AC:HGNC:29669]                                                                            | -0.693143175 | 0.430829467   | 5.237221529 | 4.113733887 |
|  | ENSRGLG00000007358  | bnip1a          | BCL2 interacting protein 1a [Source:ZFIN; Acc:ZDB-GENE-081107-44]                                                                          | -3.201888369 | 1.615830913   | 7.83542033  | 3.018200484 |
|  | ENSRGLG000000006167 | -               | -                                                                                                                                          | 1.039938998  | 0.452098965   | 6.151972974 | 6.740309994 |
|  | ENSRGLG000000011661 | rfs2            | intraflagellar transport 52 [Source:NCBI; gene:Acc:101183244]                                                                              | 2.506574804  | 0.300283689   | 3.38788578  | 5.594661759 |
|  | ENSRGLG00000007095  | -               | -                                                                                                                                          | 2.251809441  | 0.011965682   | 4.391573297 | 5.91002299  |
|  | ENSRGLG00000005291  | nme5            | NME/NUM2 family member 5 [Source:NCBI; gene:Acc:101182299]                                                                                 | -1.608791133 | 0.09667457    | 6.438607952 | 4.73364128  |
|  | ENSRGLG000000017228 | s1-zfos-223e1.2 | s1-zfos-223e1.2 [Source:ZFIN; Acc:ZDB-GENE-110411-269]                                                                                     | 1.069650024  | -0.101179444  | 6.321358948 | 7.492675211 |
|  | ENSRGLG000000010110 | -               | -                                                                                                                                          | 11.2942359   | 11.16150353   | 9.714418193 | 9.847363630 |
|  | ENSRGLG00000003197  | claf52          | clia and flagella associated protein 52 [Source:ZFIN; Acc:ZDB-GENE-050202-296]                                                             | 2.616698047  | 1.732002081   | 5.199965894 | 6.085147921 |
|  | ENSRGLG000000007010 | yfpn3           | YfpN-terminal domain containing 3 [Source:ZFIN; Acc:ZDB-GENE-050208-755]                                                                   | 13.64087417  | 13.1436128    | 3.746220417 | 4.243950103 |
|  | ENSRGLG000000006353 | fadk2.1 (of ma  | fatty acid desaturase 2 [Source:NCBI; gene:Acc:101156321]                                                                                  | 11.98309949  | 0             | 5.483546137 | 17.4678452  |
|  | ENSRGLG000000010882 | -               | -                                                                                                                                          | 1.481133038  | 1.149487496   | 3.269073221 | 3.601203769 |
|  | ENSRGLG000000016096 | -               | -                                                                                                                                          | 0            | 15.7748457    | 15.7748457  | 15.7748457  |
|  | ENSRGLG000000014069 | serpin1c        | serpin family C member 1 [Source:NCBI; gene:Acc:101170998]                                                                                 | 0.979473954  | -0.68152649   | 5.990490876 | 7.651901859 |
|  | ENSRGLG00000005926  | wdr66           | WD repeat domain 66 [Source:ZFIN; Acc:ZDB-GENE-060526-328]                                                                                 | 2.28270465   | -0.890442992  | 8.23068402  | 11.40435047 |
|  | ENSRGLG000000021663 | -               | -                                                                                                                                          | 2.74579839   | 2.165744769   | 7.231574513 | 7.182108215 |
|  | ENSRGLG000000031002 | PK3R6           | phosphoinositide-3-kinase regulatory subunit 6 [Source:HGNC; Symbol:AC:HGNC:27101]                                                         | -0.084632422 | -0.75265933   | 3.470701743 | 4.13912328  |
|  | ENSRGLG00000005126  | -               | -                                                                                                                                          | 3.956645431  | 1.165535719   | 4.366677445 | 7.150267422 |
|  | ENSRGLG000000011990 | -               | -                                                                                                                                          | 13.67309813  | 11.63218641   | 6.44017005  | 8.48151446  |

|  |                     |          |                                                                                                                 |             |              |              |              |
|--|---------------------|----------|-----------------------------------------------------------------------------------------------------------------|-------------|--------------|--------------|--------------|
|  | ENSRGLG000000002084 | prss35   | protease, serine, 35 [Source:ZFIN; Acc:ZDB-GENE-040704-55]                                                      | 4.465405264 | 0.59120549   | -3.250757889 | 0.623927177  |
|  | ENSRGLG000000013980 | gata-1   | Oryzias latipes hematopoietic transcription factor GATA-1 (gata-1), mRNA [Source:RefSeq; mRNA Acc:NM_001104852] | 6.60908277  | 1.302513202  | 4.30097474   | 1.006088682  |
|  | ENSRGLG000000016335 | gdkwv-19 | gdkwv-194e4.1 [Source:ZFIN; Acc:ZDB-GENE-100922-2]                                                              | 6.087917405 | -0.72014201  | -9.99051405  | 2.818212724  |
|  | ENSRGLG000000018482 | fh2b     | four and a half LIM domains 2b [Source:ZFIN; Acc:ZDB-GENE-041010-121]                                           | 4.040670879 | -0.689022887 | -3.951841921 | 0.778350052  |
|  | ENSRGLG000000016164 | -        | -                                                                                                               | 4.533368544 | -13.64884177 | -4.651719264 | 13.53100124  |
|  | ENSRGLG000000009396 | -        | -                                                                                                               | 4.899620832 | -2.99257098  | -3.13001121  | 4.16266366   |
|  | ENSRGLG000000017031 | hoxb13a  | homeobox B13a [Source:ZFIN; Acc:ZDB-GENE-050812-1]                                                              | 6.145051628 | -0.069145045 | -3.197172769 | 3.017508598  |
|  | ENSRGLG000000021111 | -        | -                                                                                                               | 4.103100826 | -11.72168499 | -3.21497014  | 12.61280631  |
|  | ENSRGLG000000021213 | boka     | BOK, BCL2 family apoptosis regulator A [Source:ZFIN; Acc:ZDB-GENE-040801-131]                                   | 2.726668805 | -0.75725236  | -3.83064886  | 0.346142638  |
|  | ENSRGLG000000010566 | -        | -                                                                                                               | 4.51575064  | 0.965031094  | -3.058117047 | 4.92087143   |
|  | ENSRGLG000000013646 | -        | -                                                                                                               | 3.892381887 | 2.50148212   | -7.770044011 | 2.389305131  |
|  | ENSRGLG000000014950 | ofmlm3b  | off-on-line metallopeptidase 3 [Source:ZFIN; Acc:ZDB-GENE-040801-131]                                           | 4.651016141 | 0.082959802  | -3.830075408 | 0.378466066  |
|  | ENSRGLG000000017149 | igf3p1   | insulin like growth factor binding protein 3 [Source:HGNC; Symbol:AC:HGNC:5477]                                 | 3.853169143 | 1.51851508   | -5.574789562 | 1.227709862  |
|  | ENSRGLG000000017727 | nox1     | NADPH oxidase activator 1 [Source:ZFIN; Acc:ZDB-GENE-050913-39]                                                 | 1.931882641 | 1.771033611  | -3.310705235 | -3.149373041 |
|  | ENSRGLG000000005424 | cdh16    | cadherin 16, KSP-cadherin [Source:ZFIN; Acc:ZDB-GENE-140106-140]                                                | 4.914190717 | 0.968398713  | -6.602845505 | 0.342432165  |
|  | ENSRGLG00000001358  | -        | -                                                                                                               | 5.005252235 | -2.632972238 | -6.283797586 | 1.350609131  |
|  | ENSRGLG000000012084 | fnr3     | fnTRIM family, member 83 [Source:ZFIN; Acc:ZDB-GENE-031002-11]                                                  | 3.461453107 | -0.435713717 | -3.052678224 | 0.845022713  |
|  | ENSRGLG000000017214 | ifit1    | interferon alpha-inducible protein 27-like protein 2 [Source:NCBI; gene:Acc:101155539]                          | 6.441977174 | 1.869637057  | -3.139648676 | 1.433174934  |
|  | ENSRGLG000000012589 | foxcl1   | Oryzias latipes forkhead box C1 (foxcl), mRNA [Source:NCBI; gene:Acc:101170144]                                 | 5.695111848 | -0.314818687 | -5.601418578 | 0.409896984  |
|  | ENSRGLG0000000239   | sncg1    | sncg1 [Source:ZFIN; Acc:ZDB-GENE-040801-131]                                                                    | 17.41584374 | 12.50029168  | -0.31052491  | 1.89676639   |
|  | ENSRGLG00000000239  | slc34a2b | large neutral amino acid transporter small subunit 4 [Source:NCBI; gene:Acc:101173728]                          | 7.645589271 | 3.414551359  | -3.736707010 | 6.484820197  |
|  | ENSRGLG00000001955  | -        | -                                                                                                               | 5.444736743 | 1.324467199  | -3.324295467 | 0.796458917  |
|  | ENSRGLG00000007217  | MEP1B    | meprin A subunit beta [Source:HGNC; Symbol:AC:HGNC:7020]                                                        | 3.770305076 | 1.543532208  | -3.358383278 | 1.128380630  |
|  | ENSRGLG000000012539 | klf17    | Kruppel-like factor 17 [Source:ZFIN; Acc:ZDB-GENE-010209-1]                                                     | 6.730845105 | -11.31815299 | -6.508303014 | 11.45647763  |
|  | ENSRGLG000000002682 | slc12a1  | Kruppel-like factor 12 (sodium/potassium/chloride transporter), member 1 [Source:ZFIN; Acc:ZDB-GENE-080130-3]   | 5.744249129 | 0.135524002  | -3.207883092 | 2.401326885  |
|  | ENSRGLG000000010977 | ENPP7    | ectonucleotide pyrophosphatase/phosphodiesterase family member 7 [Source:NCBI; gene:Acc:101173468]              | 4.923709544 | -7.438820311 | -4.426561328 | 7.936477616  |
|  | ENSRGLG000000040055 | -        | -                                                                                                               | 7.639288025 | -1.329668306 | -4.847301523 | 4.176136129  |
|  | ENSRGLG000000003113 | lygi2    | lysozyme g-like 2 [Source:ZFIN; Acc:ZDB-GENE-090917-1]                                                          | 5.685368891 | 1.487572301  | -3.276946994 | 0.921344511  |
|  | ENSRGLG00000010881  | acta1    | Oryzias latipes actin, alpha 1, skeletal muscle (acta1), mRNA [Source:RefSeq; mRNA Acc:NM_001048061]            | 5.927846049 | -0.472017251 | -6.68783216  | -0.28748387  |
|  | ENSRGLG000000014020 | -        | -                                                                                                               | 17.89539351 | 10.05765334  | -3.864945716 | 3.968719399  |
|  |                     |          |                                                                                                                 |             |              |              |              |

|            |      |                    |                 |                                                                                                                                                                      |              |              |              |              |
|------------|------|--------------------|-----------------|----------------------------------------------------------------------------------------------------------------------------------------------------------------------|--------------|--------------|--------------|--------------|
|            |      | ENSRORG0000012826  | mapk15          | mitogen-activated protein kinase 15<br>[Source:ZFIN;Acc:ZDB-GENE-059522-307]<br>leucine rich repeat containing 9 [Source:HGNC Symbol;Acc:HGNc19848]                  | 3.343802499  | 0.200877663  | 4.894480177  | 8.027888269  |
|            |      | ENSRORG0000015805  | LRRc3           |                                                                                                                                                                      | 11.5322098   | 10.75939722  | 5.155751759  | 5.929031261  |
|            |      | ENSRORG0000018250  | -               |                                                                                                                                                                      | 1.687997562  | -1.571293099 | 3.10707055   | 3.666844472  |
|            |      | ENSRORG0000005899  | -               |                                                                                                                                                                      | 12.51895799  | 0            | 4.651658694  | 17.17110847  |
|            |      | ENSRORG0000005465  | ndc80           | NDC80 kinetochore complex component<br>[Source:ZFIN;Acc:ZDB-GENE-030131-304]<br>Oryzias latipes neuroigin 3b (nlgn3b), mRNA<br>[Source:RefSeq mRNA;Acc:NM_001201508] | -0.802445205 | 0.093836737  | 4.152380727  | 3.256683786  |
|            |      | ENSRORG0000009580  | nlgn3b          | Oryzias latipes neuroigin 3b (nlgn3b), mRNA<br>[Source:RefSeq mRNA;Acc:NM_001201508]                                                                                 | 5.118025165  | 2.058656353  | 4.102961064  | 7.162793563  |
|            |      | ENSRORG0000006898  | tmprss12        | transmembrane protease serine 11D [Source:NCBI gene;Acc:101163815]                                                                                                   | 3.342084193  | 2.19451699   | 5.187130254  | 6.335183366  |
|            |      | ENSRORG0000012659  | -               |                                                                                                                                                                      | 12.01659591  | 10.17525013  | 3.82948946   | 5.671302951  |
|            |      | ENSRORG0000001528  | lam161a         | family with sequence similarity 161, member A<br>[Source:ZFIN;Acc:ZDB-GENE-110310-11]                                                                                | -0.186818947 | -3.216333385 | 4.544198515  | 7.574198429  |
|            |      | ENSRORG00000008394 | -               |                                                                                                                                                                      | 0.338970307  | -1.611834244 | 3.664349573  | 5.615639243  |
|            |      | ENSRORG00000014431 | -               |                                                                                                                                                                      | -11.7910005  | 2.320575781  | 18.05106234  | 3.939800033  |
|            |      | ENSRORG00000003798 | -               |                                                                                                                                                                      | -1.109135071 | 1.496233159  | 6.66331024   | 4.058427995  |
|            |      | ENSRORG00000003542 | -               |                                                                                                                                                                      | 5.092445731  | 2.17425737   | 4.519120656  | 7.437790903  |
|            |      | ENSRORG00000008244 | srckey_3016     | synovectomin [Source:NCBI gene;Acc:101165138]                                                                                                                        | 2.000775043  | 0.465279566  | 4.113886713  | 5.64866814   |
|            |      | ENSRORG00000012645 | -               |                                                                                                                                                                      | 14.48112143  | 0            | 3.60431571   | 13.08592890  |
|            |      | ENSRORG0000015836  | gabrb3          | gamma-aminobutyric acid (GABA) A receptor, beta 3<br>[Source:ZFIN;Acc:ZDB-GENE-101102-2]                                                                             | 0.199941292  | -0.814484341 | 5.526551136  | 5.641463725  |
|            |      | ENSRORG0000016648  | VASH1           | vasohitin 1 [Source:HGNC Symbol;Acc:HGNc19964]                                                                                                                       | 2.752077936  | 0.478200109  | 3.577782708  | 5.854150839  |
|            |      | ENSRORG00000001515 | -               |                                                                                                                                                                      | 0            | 11.2399663   | 16.69748758  | 5.457984163  |
|            |      | ENSRORG00000021025 | RF00004         | U2 spliceosomal RNA [Source:NCBI gene;Acc:111948530]                                                                                                                 | -0.997361427 | 0.503152328  | 7.337899258  | 5.837616151  |
|            |      | ENSRORG0000018074  | lamma           | lamin A propeptide inhibitory molecule a<br>[Source:ZFIN;Acc:ZDB-GENE-040718-323]                                                                                    | 0.079912872  | -0.238738185 | 3.857741273  | 4.176877041  |
|            |      | ENSRORG00000051979 | -               |                                                                                                                                                                      | -0.766313446 | 1.219485196  | 5.00846085   | 3.075523288  |
|            |      | ENSRORG00000010412 | -               |                                                                                                                                                                      | 0            | 11.58795093  | 16.18172084  | 4.594243252  |
|            |      | ENSRORG0000011835  | C13orf42        | uncharacterized LOC105356783 [Source:NCBI gene;Acc:105356783]                                                                                                        | 12.2499845   | 0            | 4.902681295  | 17.15315655  |
|            |      | ENSRORG0000001237  | -               |                                                                                                                                                                      | 14.68263639  | 10.22633994  | 4.63383982   | 9.99603069   |
|            |      | ENSRORG0000021684  | -               |                                                                                                                                                                      | 1.30876893   | 2.322030769  | 5.58965641   | 4.575862758  |
|            |      | ENSRORG0000012964  | -               |                                                                                                                                                                      | 0.271589972  | -0.798228142 | 4.349494937  | 5.420250545  |
|            |      | ENSRORG0000011543  | spata17         | spermatogenesis associated 17 [Source:ZFIN;Acc:ZDB-GENE-11124-1]                                                                                                     | 0.137146346  | -13.336653   | 5.946524839  | 18.97830262  |
|            |      | ENSRORG0000021620  | -               |                                                                                                                                                                      | 1.882847172  | -0.202426483 | 3.14777265   | 5.23536166   |
|            |      | ENSRORG0000017759  | ghhra           | growth hormone releasing hormone receptor a<br>[Source:ZFIN;Acc:ZDB-GENE-050315-2]                                                                                   | 0.795021855  | -0.001457198 | 4.085005057  | 4.881968947  |
|            |      | ENSRORG00000004847 | adal            | adenosine deaminase-like [Source:ZFIN;Acc:ZDB-GENE-050913-145]                                                                                                       | -0.20921279  | 0.372659638  | 3.672996565  | 3.091609054  |
|            |      | ENSRORG00000000176 | -               |                                                                                                                                                                      | 1.390940685  | 0.518509421  | 6.044829284  | 6.917743394  |
|            |      | ENSRORG0000010304  | efcab7          | EF-hand calcium binding domain 7 [Source:NCBI gene;Acc:101154938]                                                                                                    | -0.084926385 | -0.08483363  | 3.75003478   | 3.753396365  |
|            |      | ENSRORG00000010901 | nicot1          | nicotinic [Source:NCBI gene;Acc:101161020]                                                                                                                           | 1.536772833  | -0.494034617 | 3.705100756  | 5.793399486  |
|            |      | ENSRORG0000005866  | uk4             | unc-51 like kinase 4 [Source:ZFIN;Acc:ZDB-GENE-100922-243]                                                                                                           | 13.18645475  | 10.92436716  | 5.831252815  | 6.093801079  |
|            |      | ENSRORG0000010104  | wdr54           | WD repeat domain 54 [Source:NCBI gene;Acc:101162217]                                                                                                                 | 1.545116508  | 0.201060986  | 4.325708887  | 5.67024884   |
|            |      | ENSRORG00000003605 | NT5C3B (1 of 5) | 5-nucleotidase, cytosolic 11B [Source:HGNC Symbol;Acc:HGNc28300]                                                                                                     | -0.722723521 | -0.309244835 | 3.80627133   | 3.393277618  |
|            |      | ENSRORG00000007505 | pyot1ba         | phosphate cytidylyltransferase 1, choline, beta<br>[Source:NCBI gene;Acc:101166014]<br>retinoid receptor 9 [Source:HGNC Symbol;Acc:HGNc29585]                        | 1.921598149  | -10.9580808  | 3.299611625  | 16.17972408  |
|            |      | ENSRORG00000008566 | TDX9            |                                                                                                                                                                      | 0.380564865  | -0.069127268 | 9.503300826  | 9.953482739  |
|            |      | ENSRORG00000006342 | -               |                                                                                                                                                                      | 2.251309536  | -0.430164844 | 3.934154685  | 6.616711086  |
|            |      | ENSRORG00000009025 | knip3b          | Kv channel interacting protein 3b, calseinin<br>[Source:ZFIN;Acc:ZDB-GENE-040426-1752]                                                                               | 0            | 13.33493472  | 16.34771513  | 10.31352021  |
|            |      | ENSRORG0000010958  | -               |                                                                                                                                                                      | -12.35683708 | -0.733688969 | 15.90788008  | 4.284918043  |
|            |      | ENSRORG00000005158 | -               |                                                                                                                                                                      | 2.626685947  | 0.954122219  | 3.819075525  | 5.492123181  |
|            |      | ENSRORG0000010598  | -               |                                                                                                                                                                      | 15.2498949   | 12.15918703  | 3.64304516   | 6.734223201  |
|            |      | ENSRORG00000007694 | -               |                                                                                                                                                                      | 0            | 11.54400328  | 15.62719301  | 4.083662322  |
| WTT vs WTO | 1945 | ENSRORG00000002393 | aplp2           | amyloid beta (A4) precursor-like protein 2<br>[Source:ZFIN;Acc:ZDB-GENE-061039-28]                                                                                   | 3.318780979  | 0.342371246  | -2.441628181 | 0.535266342  |
|            |      | ENSRORG0000012907  | dsr1            | discoidin domain receptor tyrosine kinase 1<br>[Source:ZFIN;Acc:ZDB-GENE-060323-2]                                                                                   | 4.52709617   | 2.282370136  | -0.436485284 | 1.808720174  |
|            |      | ENSRORG00000003427 | dysf1           | dysferlin, limb girdle muscular dystrophy 2B (autosomal recessive) [Source:ZFIN;Acc:ZDB-GENE-070501-1]                                                               | 3.973765331  | 1.433126937  | 1.433126937  | 1.478001881  |
|            |      | ENSRORG0000010507  | myoz1b          | myozenin 1b [Source:ZFIN;Acc:ZDB-GENE-040718-146]                                                                                                                    | 6.054058378  | 0.956559368  | -1.174008301 | 3.923969921  |
|            |      | ENSRORG0000011813  | tcf7l1          | Oryzias latipes transcription factor 7 like 1 (tcf7l1), mRNA<br>[Source:RefSeq mRNA;Acc:NM_001252248]                                                                | 3.815829685  | 1.50430826   | -0.837572186 | 1.475154401  |
|            |      | ENSRORG0000002997  | fbpa1a (1 of 4) | fructose-1,6-bisphosphatase 1 [Source:NCBI gene;Acc:101156992]                                                                                                       | 6.014616333  | 0.098184466  | -4.290618473 | 1.626233741  |
|            |      | ENSRORG0000015869  | -               |                                                                                                                                                                      | 3.741877638  | 0.704733061  | -2.206320929 | 0.831302929  |
|            |      | ENSRORG00000000338 | pcrpb           | prolactin receptor b [Source:ZFIN;Acc:ZDB-GENE-070705-155]                                                                                                           | 3.180821458  | 0.266799915  | -9.293807196 | 0.510930604  |
|            |      | ENSRORG00000006776 | srckey_243k1    | endonuclease domain-containing 1 protein<br>[Source:NCBI gene;Acc:101169485]                                                                                         | 5.76360777   | 0.108113808  | -5.146194058 | -0.009784825 |
|            |      | ENSRORG00000004097 | ROBO2           | roundabout guidance receptor 2 [Source:HGNC Symbol;Acc:HGNc10250]                                                                                                    | 3.592276173  | 1.631865765  | -0.474008906 | 1.487068639  |
|            |      | ENSRORG0000017694  | map3k5          | mitogen-activated protein kinase kinase 5<br>[Source:ZFIN;Acc:ZDB-GENE-030827-3]                                                                                     | 3.180160968  | 0.318152516  | -2.44476452  | 0.41772881   |
|            |      | ENSRORG0000014328  | -               |                                                                                                                                                                      | 4.641407538  | 2.648002418  | -2.477954098 | -0.484064325 |
|            |      | ENSRORG0000013959  | -               |                                                                                                                                                                      | 7.003727024  | -3.958060431 | 2.298027252  | 0.50927252   |
|            |      | ENSRORG0000017374  | gata4           | GATA binding protein 4 [Source:ZFIN;Acc:ZDB-GENE-380526-476]                                                                                                         | 3.904115067  | 2.744287533  | -0.360730135 | 0.799581474  |
|            |      | ENSRORG00000021472 | RF00090         | small nuclear RNA SNORA74 [Source:NCBI gene;Acc:111948088]                                                                                                           | 3.996880456  | 0.773266631  | -1.2339749   | 1.99123855   |
|            |      | ENSRORG00000020321 | fdz6            | frizzled class receptor 6 [Source:ZFIN;Acc:ZDB-GENE-040426-1451]                                                                                                     | 3.172177999  | 1.770710854  | 0.12948439   | 1.531496448  |
|            |      | ENSRORG00000003028 | -               |                                                                                                                                                                      | 4.470196065  | 1.890296903  | -0.864399333 | 1.716074917  |
|            |      | ENSRORG00000004949 | thbs4b          | thrombospondin 4b [Source:ZFIN;Acc:ZDB-GENE-020708-4]                                                                                                                | 4.547412772  | -0.654813907 | -3.710113861 | 1.492597664  |

|  |  |                     |           |                                                                                                         |             |              |              |              |
|--|--|---------------------|-----------|---------------------------------------------------------------------------------------------------------|-------------|--------------|--------------|--------------|
|  |  | ENSRORG00000002431  | -         |                                                                                                         |             |              |              |              |
|  |  | ENSRORG0000017608   | cx32.3    | connexin 32.3 [Source:ZFIN;Acc:ZDB-GENE-030131-1337]                                                    | 6.48928282  | 0.411086148  | -5.398384259 | 0.682297762  |
|  |  | ENSRORG00000003862  | fn1b      | fibronectin 1b [Source:ZFIN;Acc:ZDB-GENE-030131-655]                                                    | 4.865396579 | 0.413072311  | -3.893565318 | 0.559213809  |
|  |  | ENSRORG000000008567 | airp71-68 | #171-68n219 [Source:ZFIN;Acc:ZDB-GENE-081105-100]                                                       | 4.100083205 | 0.281462034  | -8.834292336 | -0.555187973 |
|  |  | ENSRORG00000002426  | zpc:1159z | zpc:1159z [Source:ZFIN;Acc:ZDB-GENE-080220-231]                                                         | 7.708080521 | 3.386089241  | -6.959898964 | -2.739417255 |
|  |  | ENSRORG00000000501  | -         |                                                                                                         | 5.903923266 | 0.508623717  | -6.00682356  | -0.610799074 |
|  |  | ENSRORG0000016428   | -         |                                                                                                         | 6.183049761 | 1.57612217   | -4.810948029 | -0.203536051 |
|  |  | ENSRORG00000009643  | MAF       | MAF E2F transcription factor [Source:HGNC Symbol;Acc:HGNc6776]                                          | 5.840618636 | -0.473800594 | -3.313495165 | 3.001297445  |
|  |  | ENSRORG0000007902   | hmc12a    | homeobox protein Hox-C12a [Source:NCBI gene;Acc:101173058]                                              | 3.866480597 | 0.075003798  | -4.468793712 | -0.676830569 |
|  |  | ENSRORG00000003247  | foxd1     | Oryzias latipes foxhead box D1 (foxd1), mRNA<br>[Source:RefSeq mRNA;Acc:NM_001604521]                   | 15.69788521 | 10.28146644  | -5.462715463 | -0.045834351 |
|  |  | ENSRORG00000016373  | twist3    | Oryzias latipes twist-related protein 2-like (LOC101163973), mRNA [Source:RefSeq mRNA;Acc:NM_001339017] | 5.648500059 | -2.4557753   | -4.61393852  | 3.490829665  |
|  |  | ENSRORG00000005075  | deop1     | dieneptidase 1 [Source:ZFIN;Acc:ZDB-GENE-061013-388]                                                    | 6.278980683 | -2.246700287 | -6.30759353  | 3.888719046  |
|  |  | ENSRORG00000000213  | cldn1     | claudin 1 [Source:ZFIN;Acc:ZDB-GENE-010328-9]                                                           | 7.015869857 | 1.735556816  | -5.86301023  | -0.582199188 |
|  |  | ENSRORG00000002396  | FBLN1 (1) | fibulin 1 [Source:HGNC Symbol;Acc:HGNc3600]                                                             | 3.973990209 | 0.532417758  | -4.006266771 | -0.564106897 |
|  |  | ENSRORG0000013582   | trvisn.2  | trvisn.2 [Source:NCBI gene;Acc:101161921]                                                               | 7.498538011 | 1.546698853  | -6.370625912 | -0.418051677 |
|  |  | ENSRORG0000016784   | RG56      | regulator of G protein signaling 6 [Source:HGNC Symbol;Acc:HGNc19002]                                   | 2.234070787 | -0.636667212 | -3.78465236  | -0.913429239 |
|  |  | ENSRORG00000000487  | ep8f3a    | EP8f3a like 3a [Source:ZFIN;Acc:ZDB-GENE-091204-460]                                                    | 4.300571721 | -1.093588391 | -3.29049925  | 2.104145709  |
|  |  | ENSRORG00000000858  | pitx1     | paired-like homeodomain 1 [Source:ZFIN;Acc:ZDB-GENE-060421-3623]                                        | 5.305718698 | 0.429706529  | -3.159373984 | 1.717124567  |
|  |  | ENSRORG00000002303  | -         |                                                                                                         | 6.78994368  | 10.96260686  | -3.872655377 | 1.86515079   |
|  |  | ENSRORG0000017946   | apoda2    | apodoprotein D-like [Source:NCBI gene;Acc:101167573]                                                    | 8.428454749 | 3.278659     | -20.60613079 | -15.45624896 |
|  |  | ENSRORG0000010290   | poicea    | procollagen C-endopeptidase enhancer a<br>[Source:ZFIN;Acc:ZDB-GENE-041014-370]                         | 4.604069371 | 1.623797028  | -4.148510213 | -1.167752824 |
|  |  | ENSRORG0000011244   | ank1b     | ankyrin 1, erythrocytic b [Source:ZFIN;Acc:ZDB-GENE-091113-6]                                           | 5.531184224 | -7.573896238 | -8.015517362 | 4.000068833  |
|  |  | ENSRORG0000010562   | -         |                                                                                                         | 3.984543836 | 0.323846136  | -3.833968617 | -0.17726674  |
|  |  | ENSRORG0000018030   | HMOX2 (1) | hemoxylin A2 [Source:HGNC Symbol;Acc:HGNc5103]                                                          | 5.113148006 | 2.548746231  | -3.48671471  | -0.83052005  |
|  |  | ENSRORG00000000987  | kdh       | vanthine dehydrogenase [Source:ZFIN;Acc:ZDB-GENE-070719-9]                                              | 5.830762083 | 1.75615232   | -3.137763498 | 0.937361201  |
|  |  | ENSRORG0000014439   | CEL       | bile salt-activated lipase [Source:NCBI gene;Acc:101172470]                                             | 5.58024666  | -1.387756817 | -3.42916416  | 3.42916416   |
|  |  | ENSRORG0000010528   | -         |                                                                                                         | 6.104418832 | 1.656494649  | -4.898853562 | -0.405995808 |
|  |  | ENSRORG00000003253  | patm      | glycine amidinotransferase (L-arginine glycine amidinotransferase) [Source:ZFIN;Acc:ZDB-GENE-021015-1]  | 1           |              |              |              |

|                    |                 |                                                                                                                |             |              |              |              |
|--------------------|-----------------|----------------------------------------------------------------------------------------------------------------|-------------|--------------|--------------|--------------|
| ENSRORG0000015095  | prpf39          | PRP39 pre-mRNA processing factor 39 homolog (yeast) [Source:ZFIN;Acc:ZDB-GENE-030616-420]                      | 3.680010812 | 1.380407899  | -0.448131495 | 1.851956188  |
| ENSRORG0000017918  | ackr4a          | physical chemokine receptor 4a [Source:ZFIN;Acc:ZDB-GENE-073001-6]                                             | 3.406551601 | 2.250724654  | -1.387254212 | -0.230942429 |
| ENSRORG0000012666  | hpcal1          | hippocalin-like protein 1 [Source:NCBI gene;Acc:101171795]                                                     | 4.268542979 | 2.308399373  | 0.4734192    | 2.434048622  |
| ENSRORG0000013166  | fgl2a           | fibrinogen-like 2a [Source:ZFIN;Acc:ZDB-GENE-030131-9560]                                                      | 4.062427488 | 1.763563423  | -2.283990549 | 0.01553771   |
| ENSRORG0000003107  | lfox1           | Oryzias latipes forkhead box O1 (lfox1), mRNA [Source:RefSeq mRNA;Acc:NM_00166464]                             | 3.084425391 | 0.309850632  | -2.092273372 | 0.682785875  |
| ENSRORG0000014196  | cdh10a          | protodanherin 10a [Source:ZFIN;Acc:ZDB-GENE-020731-1]                                                          | 3.895698429 | 0.58829073   | -1.723411701 | 1.584143905  |
| ENSRORG0000007245  | mrv1            | murine retrovirus integration site 1 homolog [Source:ZFIN;Acc:ZDB-GENE-120221-4]                               | 3.400419307 | 1.169915452  | 0.446684778  | 2.677853388  |
| ENSRORG0000010593  | zan1            | zonadhesin, like [Source:ZFIN;Acc:ZDB-GENE-060131-2]                                                           | 5.732969331 | -1.58705448  | -4.623218465 | 2.69731147   |
| ENSRORG00000021760 | -               | -                                                                                                              | 4.334080371 | 1.057189155  | -0.953579993 | 2.323798203  |
| ENSRORG0000015797  | srgap2          | SLIT-ROBO Rho GTPase activating protein 2 [Source:ZFIN;Acc:ZDB-GENE-060915-9]                                  | 3.041644811 | 1.29789519   | -1.13073343  | 0.631161196  |
| ENSRORG0000016997  | ipl             | lipoprotein lipase [Source:ZFIN;Acc:ZDB-GENE-990415-138]                                                       | 3.205364917 | 0.732280669  | -1.142948885 | 1.330622172  |
| ENSRORG0000014825  | -               | -                                                                                                              | 6.108155378 | 2.433089903  | -0.702627192 | 2.915278788  |
| ENSRORG0000005129  | gfrt2           | glutamine-fructose-6-phosphate transaminase 2 [Source:ZFIN;Acc:ZDB-GENE-071113-11]                             | 5.066022869 | -0.239634028 | -4.0819431   | 1.224237919  |
| ENSRORG0000008092  | znc175248       | znc175248 [Source:ZFIN;Acc:ZDB-GENE-080204-89]                                                                 | 3.449742108 | -1.380591884 | -0.891175265 | 3.939642917  |
| ENSRORG0000013386  | -               | -                                                                                                              | 6.789547218 | 3.091747188  | -6.187850116 | -0.48861011  |
| ENSRORG0000015566  | -               | -                                                                                                              | 3.235061468 | 1.147132545  | -0.838459493 | 0.965740054  |
| ENSRORG0000016706  | lam120c         | family with sequence similarity 120C [Source:ZFIN;Acc:ZDB-GENE-080313-228]                                     | 3.478525903 | 0.68711009   | -1.53167500  | 1.02869024   |
| ENSRORG0000008293  | cryp1a          | cysteine and glycine-rich protein 1a [Source:ZFIN;Acc:ZDB-GENE-030909-4]                                       | 4.153165039 | 2.53471335   | 1.300076372  | 2.920255337  |
| ENSRORG0000012154  | rbm38           | RNA binding motif protein 38 [Source:ZFIN;Acc:ZDB-GENE-030131-5923]                                            | 4.061509811 | 1.80926718   | -3.788687811 | -1.535959873 |
| ENSRORG0000004786  | pdgfr           | platelet-derived growth factor receptor, beta [Source:ZFIN;Acc:ZDB-GENE-030905-2]                              | 3.102661884 | 2.057953473  | -1.682373215 | -0.637043821 |
| ENSRORG0000003229  | prickle1a       | prickle homolog 1a [Source:ZFIN;Acc:ZDB-GENE-030724-5]                                                         | 3.631051088 | 2.016885028  | -0.899594656 | 0.715059907  |
| ENSRORG0000015184  | dusp5           | dual specificity phosphatase 5 [Source:ZFIN;Acc:ZDB-GENE-010625-1]                                             | 5.425136084 | 2.049056472  | -1.21237937  | 2.164187027  |
| ENSRORG0000004772  | gna14           | guanine nucleotide-binding protein subunit alpha-11 [Source:NCBI gene;Acc:101168134]                           | 3.050439658 | 1.011527068  | 0.362541801  | 2.401939253  |
| ENSRORG0000004564  | hnf1ba          | HNF1 homeobox B [Source:ZFIN;Acc:ZDB-GENE-020104-1]                                                            | 6.613013984 | 0.352690718  | -3.852870183 | 2.407935855  |
| ENSRORG0000012339  | lam84b          | family with sequence similarity 84, member B [Source:ZFIN;Acc:ZDB-GENE-080929-119]                             | 3.48898438  | 0.786395413  | -1.107404085 | 1.596880372  |
| ENSRORG0000011475  | sc29a3          | transcription, member 3 [Source:ZFIN;Acc:ZDB-GENE-081107-46]                                                   | 3.412717657 | 0.69080187   | -2.122735475 | 0.599665645  |
| ENSRORG0000017465  | cx3c.4          | connexin 35.4 [Source:ZFIN;Acc:ZDB-GENE-050417-107]                                                            | 5.172718361 | 0.310958033  | -2.094058033 | 2.768188321  |
| ENSRORG0000016323  | -               | -                                                                                                              | 5.8846829   | 1.602977613  | -2.481501706 | 1.800681392  |
| ENSRORG0000014817  | PTPFR           | protein tyrosine phosphatase, receptor type 5 [Source:HGNC Symbol;Acc:HGNC:3661]                               | 3.733122641 | 0.204169294  | -0.855172811 | 0.673728359  |
| ENSRORG0000009594  | ovalb1 (1 of 2) | ovalbumin 1 [Source:ZFIN;Acc:ZDB-GENE-040625-57]                                                               | 6.567006946 | 1.641268733  | -4.447429873 | 0.478793284  |
| ENSRORG0000009499  | TMEM100         | transmembrane protein 100 [Source:NCBI gene;Acc:101174190]                                                     | 4.759468997 | 0.622771253  | -3.014621936 | 1.122651934  |
| ENSRORG0000008991  | EPHA4           | EPH receptor A4 [Source:HGNC Symbol;Acc:HGNC:3388]                                                             | 3.909653984 | 1.854799294  | -1.172746344 | 3.028094062  |
| ENSRORG0000016108  | tuba8f3         | tubulin alpha-1A chain-like [Source:NCBI gene;Acc:101168346]                                                   | 3.234411958 | 2.333917959  | 0.347629593  | 1.24860952   |
| ENSRORG0000001797  | tnrc2           | tropomyosin C, skeletal muscle [Source:ZFIN;Acc:ZDB-GENE-101171829]                                            | 4.066024637 | -0.153793838 | -3.965722921 | 0.254802825  |
| ENSRORG0000003311  | -               | -                                                                                                              | 4.311529836 | -0.166456988 | -1.917506434 | 2.570905434  |
| ENSRORG0000014507  | wf13ba          | winged family member 13Ba [Source:ZFIN;Acc:ZDB-GENE-070521-1]                                                  | 4.340947751 | 1.903995295  | -0.644082141 | 1.79335438   |
| ENSRORG0000008367  | prom2           | prominin 2 [Source:ZFIN;Acc:ZDB-GENE-080723-16]                                                                | 3.509035725 | 2.650896475  | -0.477793835 | -            |
| ENSRORG0000004396  | hsp1            | HMG-box transcription factor 1 [Source:ZFIN;Acc:ZDB-GENE-050522-414]                                           | 4.000994126 | 1.804249184  | 0.13842785   | 2.335657431  |
| ENSRORG0000012739  | dec1a           | Oryzias latipes DLH1 protein DEC1a (dec1a), mRNA [Source:RefSeq mRNA;Acc:NM_001104731]                         | 3.070121004 | 1.25596741   | -1.66507323  | 0.149560953  |
| ENSRORG0000007659  | batk1a          | BAH domain and coiled-coil containing 1a [Source:ZFIN;Acc:ZDB-GENE-170301-1]                                   | 3.69989242  | 2.148832769  | -0.614433727 | 0.936304162  |
| ENSRORG0000011589  | -               | -                                                                                                              | 6.87448947  | 2.1466698497 | -1.466602877 | 3.199574123  |
| ENSRORG0000002751  | -               | -                                                                                                              | 4.466840812 | 1.514237337  | -3.656678047 | -0.703588966 |
| ENSRORG0000006744  | -               | -                                                                                                              | 4.642196353 | 1.968179414  | -0.27319517  | 2.401310599  |
| ENSRORG0000013773  | NTF3C8 (1 of 5) | 5'-nucleotidase, cytosolic 11B [Source:HGNC Symbol;Acc:HGNC:78300]                                             | 4.545861772 | 2.062058679  | 0.397641193  | 2.881931887  |
| ENSRORG0000011260  | -               | -                                                                                                              | 16.52339365 | 12.01494453  | -4.659374242 | -0.149023062 |
| ENSRORG0000012204  | infrs1a         | tumor necrosis factor receptor superfamily, member 1a [Source:ZFIN;Acc:ZDB-GENE-040626-2923]                   | 4.171160794 | 2.739640142  | 0.7492732    | 2.14932378   |
| ENSRORG0000003459  | saem1b          | SAC1 like phosphatidylinositol phosphatase b [Source:ZFIN;Acc:ZDB-GENE-070112-547]                             | 3.290494605 | 1.577483136  | -0.771023999 | 0.942472634  |
| ENSRORG0000009143  | SPOCK2          | SPOCK (osteonectin), ovine and kazal like domains proteoglycan 2 [Source:HGNC Symbol;Acc:HGNC:13564]           | 4.886831932 | 0.681794482  | -3.289486626 | 0.916032911  |
| ENSRORG0000015101  | slc13a3         | solute carrier family 13 member 3 [Source:NCBI gene;Acc:101173224]                                             | 5.454241525 | -2.10344218  | -3.120776117 | 4.437278924  |
| ENSRORG0000017338  | apocd1          | apolipoprotein D [Source:NCBI gene;Acc:101167075]                                                              | 5.082045188 | 2.03372608   | -4.616334186 | -1.567529338 |
| ENSRORG0000013603  | tryp            | Oryzias latipes trypsinogen (tryp), mRNA [Source:RefSeq mRNA;Acc:NM_001104900]                                 | 6.722881284 | 1.892860411  | -6.321638049 | -0.591130368 |
| ENSRORG0000013980  | gata-1          | Oryzias latipes hematopoietic transcription factor GATA-1 (gata-1), mRNA [Source:RefSeq mRNA;Acc:NM_001104885] | 6.608908277 | 1.30251302   | -4.30097476  | 1.006098882  |
| ENSRORG0000004873  | rasa3           | RAS G21 protein activator 3 [Source:ZFIN;Acc:ZDB-GENE-090313-21]                                               | 3.761048586 | 1.61087599   | -1.048830156 | 1.101826997  |
| ENSRORG0000009847  | smnl1           | smoothened, like [Source:ZFIN;Acc:ZDB-GENE-040212-11]                                                          | 3.188577859 | 2.242526653  | -3.174968847 | -0.610433112 |
| ENSRORG0000002057  | neu1            | neuraminidase 1 [Source:ZFIN;Acc:ZDB-GENE-080503-859]                                                          | 3.385000873 | 0.263535423  | -2.58200502  | 0.565749848  |
| ENSRORG0000008046  | efn2            | endothelin 2 [Source:ZFIN;Acc:ZDB-GENE-060503-774]                                                             | 3.690352906 | 2.384006495  | -1.312852921 | -0.062021174 |
| ENSRORG0000007442  | hgd             | homogentisate 1,2-dioxygenase [Source:NCBI gene;Acc:101170627]                                                 | 4.048000948 | 0.350752572  | -1.239343413 | 2.458389868  |
| ENSRORG0000016335  | slc14ey-1946e   | slc14ey-1946e.1 [Source:ZFIN;Acc:ZDB-GENE-100922-43]                                                           | 6.087947655 | -0.72014281  | -3.993051405 | 2.818251224  |
| ENSRORG0000011153  | -               | -                                                                                                              | 3.804554596 | 2.00354915   | 1.051118716  | 2.852699374  |
| ENSRORG0000008813  | wnt5a           | wingless-type MMTV integration site family, member 5a [Source:ZFIN;Acc:ZDB-GENE-060329-3]                      | 4.427720753 | 1.084308089  | -1.84701384  | 1.486969355  |
| ENSRORG0000011430  | ptp1b           | polyphosphatase 1 [Source:NCBI gene;Acc:101165926]                                                             | 3.270733471 | 0.678377983  | 0.114302256  | 2.707142679  |

|                    |                 |                                                                                                                 |             |              |              |              |
|--------------------|-----------------|-----------------------------------------------------------------------------------------------------------------|-------------|--------------|--------------|--------------|
| ENSRORG0000017041  | HOBX5 (1)       | homeobox B5 [Source:HGNC Symbol;Acc:HGNC:5116]                                                                  | 5.17301842  | 1.58571786   | -4.858580005 | -1.268072783 |
| ENSRORG0000017492  | sp9             | Sp9 transcription factor [Source:NCBI gene;Acc:101162490]                                                       | 5.492717124 | -0.137475663 | -3.0489747   | 2.581702422  |
| ENSRORG0000004788  | ppargc1a        | peroxisome proliferator-activated receptor gamma, coactivator 1 alpha [Source:ZFIN;Acc:ZDB-GENE-080505-1]       | 5.857486152 | -1.218823043 | -3.002275632 | 4.07451885   |
| ENSRORG0000017013  | col1            | collagen type I alpha 1 [Source:NCBI gene;Acc:101444868]                                                        | 5.191811628 | 2.204410913  | -3.977964656 | -0.950079044 |
| ENSRORG0000004326  | typ1a           | tyrosinase-related protein 1a [Source:ZFIN;Acc:ZDB-GENE-070718-21]                                              | 4.948163131 | 0.360301499  | -3.143251459 | 1.445049707  |
| ENSRORG00000005033 | slc34a1a        | solute carrier family 34 type II sodium/phosphate cotransporter, member 1a [Source:ZFIN;Acc:ZDB-GENE-101006-3]  | 6.094690887 | 0.354673694  | -6.93282838  | -1.192757079 |
| ENSRORG00000005297 | gpc3            | Oryzias latipes hemoglobin embryonic unit alpha-like (LOC101155300), mRNA [Source:RefSeq mRNA;Acc:NM_001278888] | 8.600170769 | 2.956423589  | -3.487102863 | 2.172666804  |
| ENSRORG00000015202 | adams15         | ADAM metalloproteinase with thrombospondin type 1 motif, 15h [Source:ZFIN;Acc:ZDB-GENE-070814-5]                | 4.657183288 | 1.342555331  | -3.805973502 | -0.48080161  |
| ENSRORG00000001346 | -               | -                                                                                                               | 4.858232369 | 1.681708476  | -4.778063521 | -1.609635203 |
| ENSRORG00000004586 | ela2l           | chymotrypsin-like elastase family member 2A [Source:NCBI gene;Acc:101188781]                                    | 7.410065549 | 2.399678539  | -5.848825611 | -0.835953071 |
| ENSRORG0000017048  | homb3a          | homobox B3a [Source:ZFIN;Acc:ZDB-GENE-990415-104]                                                               | 6.115488673 | 0.753846706  | -4.034385247 | 1.923252633  |
| ENSRORG00000005190 | scrlmb          | scirpin [Source:NCBI gene;Acc:101159731]                                                                        | 5.432171473 | 0.918626042  | -3.289395935 | 1.22467665   |
| ENSRORG0000000240  | -               | -                                                                                                               | 7.184859465 | -11.77195159 | -5.398568721 | 13.56145025  |
| ENSRORG0000000217  | -               | -                                                                                                               | 6.611908676 | -0.163535351 | -5.543656187 | 3.22630105   |
| ENSRORG0000011188  | -               | -                                                                                                               | 5.064801545 | -0.875734074 | -0.826852375 | -            |
| ENSRORG0000004222  | fgf3            | fibroblast-like 3 (secreted glycoprotein) [Source:ZFIN;Acc:ZDB-GENE-050913-111]                                 | 3.544933568 | -0.597288362 | -4.403607651 | 0.260090531  |
| ENSRORG00000004990 | adams1          | ADAM metalloproteinase with thrombospondin type 1 motif, 1 [Source:ZFIN;Acc:ZDB-GENE-070814-1]                  | 3.587769774 | 1.5020392    | -3.501735911 | -1.244784781 |
| ENSRORG0000013041  | -               | -                                                                                                               | 5.572424885 | 3.03447117   | -4.93587584  | -2.397436318 |
| ENSRORG00000002764 | slc14eyp-8ff7.4 | slc14eyp-8ff7.4 [Source:ZFIN;Acc:ZDB-GENE-091204-252]                                                           | 5.382815724 | -0.354390362 | -3.296175131 | 2.44151572   |
| ENSRORG00000001032 | cpb1            | carboxypeptidase B1 [Source:NCBI gene;Acc:101169819]                                                            | 7.051475306 | 0.985571202  | -6.777844683 | -0.711455828 |
| ENSRORG0000007955  | hoxc4           | Oryzias latipes homeobox C4 (hoxc4), mRNA [Source:RefSeq mRNA;Acc:NM_001104878]                                 | 3.469530974 | 0.69280756   | -4.024329459 | 0.247144143  |
| ENSRORG0000013386  | tm6d6           | transmembrane protein 624 trafficking protein 6 [Source:ZFIN;Acc:ZDB-GENE-131211-182]                           | 6.210161904 | 3.275843885  | -3.409458423 | -0.473655099 |
| ENSRORG00000002020 | gb              | Oryzias latipes hemoglobin beta-1-like (gb), mRNA [Source:RefSeq mRNA;Acc:NM_001278824]                         | 6.325032807 | 0.11864033   | -3.95062181  | 2.263027464  |
| ENSRORG0000007672  | -               | -                                                                                                               | 5.652550364 | 1.1307624    | -3.84447124  | 0.677801249  |
| ENSRORG0000010663  | ela3l           | chymotrypsin-like elastase family member 2A [Source:NCBI gene;Acc:101165737]                                    | 10.01339013 | 3.57369657   | -17.5845459  | -11.14479206 |
| ENSRORG0000012158  | rab25a          | RAB25, member RAS oncogene family member 2A [Source:ZFIN;Acc:ZDB-GENE-041212-69]                                | 5.827123876 | -0.257157534 | -3.240282519 | 2.944482738  |
| ENSRORG0000017893  | -               | -                                                                                                               | 7.288083566 | -11.10417938 | -4.517937813 | 13.83083009  |
| ENSRORG0000005173  | casz1           | castor zinc finger 1 [Source:ZFIN;Acc:ZDB-GENE-061031-108]                                                      | 2.492966077 | -0.497476895 | -3.034956522 | -0.044028601 |
| ENSRORG00000015899 | -               | -                                                                                                               | 4.021738524 | -2.534924635 | -4.075888238 | 2.481161094  |
| ENSRORG0000007133  | -               | -                                                                                                               | 3.471395602 | -13.15945603 | -3.25709673  | 13.373398313 |
| ENSRORG00000004130 | mb              | myosin b [Source:NCBI gene;Acc:101156224]                                                                       | 8.98274534  | -0.631610862 | -7.684404818 | 1.950439931  |
| ENSRORG00000005559 | TNNI2 (1)       | tropomyosin 12, fast skeletal type [Source:HGNC Symbol;Acc:HGNC:11466]                                          | 4.74749565  |              |              |              |

|                     |                |                                                                                                  |             |              |              |              |
|---------------------|----------------|--------------------------------------------------------------------------------------------------|-------------|--------------|--------------|--------------|
| ENSRGLG00000012482  | hi2b           | four and a half LIM domains 2b [Source:ZFIN;Acc:ZDB-GENE-0410101-121]                            | 4.040670879 | -0.689022887 | -3.951841921 | 0.778335052  |
| ENSRGLG00000015280  | ZC3H12D        | zinc finger CCHC-type containing 12D [Source:HGNC Symbol;Acc:HGNC:21175]                         | 4.520462764 | 1.323955134  | -2.234744924 | 0.962247948  |
| ENSRGLG00000017965  | dapk3          | death associated protein kinase 3 [Source:NCBI gene;Acc:101168492]                               | 3.067270324 | 2.114616104  | 1.612597984  | 2.565737302  |
| ENSRGLG00000007807  | rims2b         | RNA binding motif, single stranded interacting protein 2b [Source:ZFIN;Acc:ZDB-GENE-0408001-511] | 3.245844635 | 2.616493411  | -0.102917847 | -0.383061652 |
| ENSRGLG00000003778  | malb           | myelin and lymphocyte protein-like [Source:NCBI gene;Acc:101155876]                              | 3.444916317 | 0.314675256  | -0.253526558 | 2.877199395  |
| ENSRGLG00000008138  | fat1a          | FAT atypical cadherin 1a [Source:ZFIN;Acc:ZDB-GENE-050425-3]                                     | 3.028095048 | 0.917585545  | -1.605760033 | 0.506234235  |
| ENSRGLG00000003230  | -              | corticotropin-releasing factor-binding protein [Source:NCBI gene;Acc:101156980]                  | 4.103100836 | -11.72416849 | -3.214970114 | 12.61289631  |
| ENSRGLG00000013393  | -              | -                                                                                                | 3.278520064 | -1.114789868 | -2.450979318 | -0.288764633 |
| ENSRGLG00000006697  | map3k10        | mitogen-activated protein kinase kinase 10 [Source:ZFIN;Acc:ZDB-GENE-050419-112]                 | 4.989611411 | 0.778796774  | -1.772456752 | 2.438838829  |
| ENSRGLG00000007888  | tdp5a          | P53, Rb1, GEF and PH domain containing 5a [Source:ZFIN;Acc:ZDB-GENE-090429-3]                    | 4.982918789 | 2.401042188  | -0.011140641 | 2.571220544  |
| ENSRGLG000000008627 | copcd2         | poppey domain containing 2 [Source:NCBI gene;Acc:101170131]                                      | 3.926474855 | -2.044679981 | -1.119759843 | 0.762520529  |
| ENSRGLG00000013644  | -              | -                                                                                                | 4.651016141 | 0.082959982  | -8.830075408 | 0.738468066  |
| ENSRGLG00000005923  | prfra          | proctin receptor A [Source:ZFIN;Acc:ZDB-GENE-080103-2]                                           | 4.397184781 | 0.458533916  | -1.268379254 | 2.67075623   |
| ENSRGLG00000006052  | DOK7           | docking protein 7 [Source:HGNC Symbol;Acc:HGNC:26594]                                            | 3.711645127 | 1.36660147   | -0.87660756  | 1.466877845  |
| ENSRGLG00000007210  | tmprss13a      | transmembrane serine protease 13a [Source:ZFIN;Acc:ZDB-GENE-090309-3]                            | 4.388386449 | 0.342651045  | -0.306672727 | 2.63195244   |
| ENSRGLG00000001727  | noxa1          | NADPH oxidase activator 1 [Source:ZFIN;Acc:ZDB-GENE-050913-32]                                   | 4.914190217 | 0.969398713  | -3.602845505 | 0.342432195  |
| ENSRGLG00000017167  | tmem200a       | transmembrane protein 200A [Source:ZFIN;Acc:ZDB-GENE-040724-81]                                  | 3.276279029 | 1.944003602  | -1.940297919 | -0.6081862   |
| ENSRGLG00000008314  | -              | -                                                                                                | 6.225227007 | 2.472159241  | -1.560358249 | 2.193194063  |
| ENSRGLG00000009475  | adora2aa       | adenosine A2a receptor A [Source:ZFIN;Acc:ZDB-GENE-080723-28]                                    | 5.759024461 | 2.581598369  | -1.740793057 | 1.437126706  |
| ENSRGLG000000009455 | lam20ca        | family with sequence similarity 20, member Ca [Source:ZFIN;Acc:ZDB-GENE-130529-759]              | 3.174251416 | 0.759921342  | -1.073692527 | 1.34112851   |
| ENSRGLG000000060601 | ad3b3          | adducin 3 (gamma) b [Source:ZFIN;Acc:ZDB-GENE-080718-6]                                          | 3.897416475 | 2.661571946  | -0.029920171 | 1.206409203  |
| ENSRGLG00000001062  | mcp1b          | multiple C2 domains, transmembrane 1b [Source:ZFIN;Acc:ZDB-GENE-090013-382]                      | 4.304010036 | 3.343102685  | -0.867541213 | 0.09385211   |
| ENSRGLG00000003626  | ofmln1b        | olfactomedin 1b [Source:NCBI gene;Acc:101160252]                                                 | 3.940923833 | 1.436640576  | -1.221378909 | 1.23839997   |
| ENSRGLG00000005995  | sulf1a6        | sulfotransferase family 1A member 4 [Source:NCBI gene;Acc:100125513]                             | 3.459076404 | 1.623905277  | -2.168009801 | -0.332353833 |
| ENSRGLG00000016110  | -              | -                                                                                                | 6.156951286 | 3.063470661  | -2.53839003  | 0.557126082  |
| ENSRGLG00000014658  | col5a2a        | collagen, type V, alpha 2a [Source:ZFIN;Acc:ZDB-GENE-030616-13]                                  | 4.1099722   | 1.538913392  | -2.960706034 | -0.389062483 |
| ENSRGLG000000010340 | si.ch211-285f1 | si.ch211-285f1.1 [Source:ZFIN;Acc:ZDB-GENE-000607-77]                                            | 3.102813598 | 0.877112586  | -1.22545544  | 1.000670521  |
| ENSRGLG000000012270 | tmc8           | transmembrane channel-like 8 [Source:ZFIN;Acc:ZDB-GENE-080114-2]                                 | 4.15009734  | 1.833795088  | -2.225118562 | 0.09166903   |
| ENSRGLG00000005095  | atg5l (1 of m) | prostaglandin-endoperoxide synthase 1 [Source:ZFIN;Acc:ZDB-GENE-020530-1]                        | 3.874894712 | 2.107335716  | -1.957549931 | -0.189516498 |
| ENSRGLG00000016556  | epor           | erythropoietin receptor [Source:NCBI gene;Acc:101163579]                                         | 4.945361004 | 0.459058895  | -2.37281736  | 1.21406902   |
| ENSRGLG00000002378  | gata5          | GATA binding protein 5 [Source:ZFIN;Acc:ZDB-GENE-980526-340]                                     | 3.891284209 | 2.133357094  | -0.712327363 | 1.048095217  |
| ENSRGLG00000011358  | -              | -                                                                                                | 3.461453107 | -0.435713177 | -3.052628224 | 0.804502713  |
| ENSRGLG00000007935  | hox2b          | Orx2b, homeobox C19 (hox2b), mRNA [Source:RefSeq mRNA;Acc:NM_0163250]                            | 3.457910947 | 1.089646107  | -1.746035828 | 0.622896052  |
| ENSRGLG00000006224  | tgmb5l         | transglutaminase 5, like [Source:ZFIN;Acc:ZDB-GENE-110411-176]                                   | 3.557556321 | -0.095230723 | -1.699915602 | 1.9533914    |
| ENSRGLG00000013083  | -              | -                                                                                                | 6.719332656 | 1.724741547  | -1.454915613 | 2.565890129  |
| ENSRGLG00000012566  | dsela          | dermatan sulfate epimerase like A [Source:ZFIN;Acc:ZDB-GENE-030131-7517]                         | 4.222584146 | 2.547209171  | -1.706681231 | -0.030821364 |
| ENSRGLG00000010158  | DACT1          | dishevelled binding antagonist of beta catenin 1 [Source:HGNC Symbol;Acc:HGNC:17748]             | 3.586898885 | 1.423745336  | -0.618326959 | 1.545310803  |
| ENSRGLG00000011821  | -              | -                                                                                                | 3.088962739 | 0.11844079   | -0.992623897 | 1.97838397   |
| ENSRGLG00000016887  | vegfab         | vascular endothelial growth factor Ab [Source:ZFIN;Acc:ZDB-GENE-030131-4605]                     | 3.937319236 | 3.225007841  | 1.79546119   | 2.463599988  |
| ENSRGLG00000012084  | itr83          | Int1R1M family, member 83 [Source:ZFIN;Acc:ZDB-GENE-031002-111]                                  | 6.441977174 | 1.869637057  | -3.139648676 | 1.433174934  |
| ENSRGLG00000017214  | -              | -                                                                                                | 5.695111848 | -0.314818687 | -5.601418588 | 0.408996984  |
| ENSRGLG00000011345  | kirrel1a       | kirie like receptor family adhesion molecule 1a [Source:ZFIN;Acc:ZDB-GENE-040426-2128]           | 3.349997608 | 0.989800543  | -1.465473546 | 0.89520855   |
| ENSRGLG00000000521  | -              | -                                                                                                | 4.161529169 | 1.634953584  | 0.192738733  | 2.719798590  |
| ENSRGLG0000001937   | cypl1c2        | cytochrome P450, family 1, subfamily C, polypeptide 2 [Source:ZFIN;Acc:ZDB-GENE-050705-1]        | 3.364389098 | 2.245378864  | -1.442523864 | -0.321228292 |
| ENSRGLG00000010043  | -              | -                                                                                                | 3.189333566 | 2.116567544  | 0.66058265   | 1.733838973  |
| ENSRGLG00000007120  | -              | -                                                                                                | 4.359733866 | 2.399379677  | 0.62956662   | 2.234748602  |
| ENSRGLG00000012589  | foxc1          | Orx2b, homeobox C1 (foxc1), mRNA [Source:RefSeq mRNA;Acc:NM_0160451]                             | 17.41564374 | 12.50029168  | -3.019052491 | 1.89676639   |
| ENSRGLG00000013232  | -              | -                                                                                                | 3.108653669 | 0.768629856  | -1.265808944 | 1.074699448  |
| ENSRGLG00000000000  | doc9b9         | dedicator of cytokinesis 9b [Source:ZFIN;Acc:ZDB-GENE-090916-2]                                  | 3.114297783 | 0.829632501  | -0.723287444 | 1.561862355  |
| ENSRGLG00000012302  | scrib          | scribble planar cell polarity protein [Source:ZFIN;Acc:ZDB-GENE-030616-572]                      | 3.174071444 | 1.005525543  | -0.872261345 | 1.296769427  |
| ENSRGLG00000011752  | -              | -                                                                                                | 4.115908297 | 2.586607373  | -1.656640037 | -0.12631978  |
| ENSRGLG00000015664  | rtg5           | integrin, alpha 5 (fibronectin receptor, alpha polypeptide) [Source:ZFIN;Acc:ZDB-GENE-030116-52] | 4.422320213 | 1.813017357  | -1.059746508 | 1.549951741  |
| ENSRGLG00000001444  | ttc7a          | tetratricopeptide repeat domain 7A [Source:ZFIN;Acc:ZDB-GENE-010319-27]                          | 6.258332859 | 2.326592802  | -1.330723205 | 2.601497991  |
| ENSRGLG00000003462  | -              | -                                                                                                | 16.4908443  | 12.04407645  | -2.970725243 | 1.476510956  |
| ENSRGLG00000001955  | -              | -                                                                                                | 3.770305076 | 1.543353208  | -3.355832378 | -1.128398063 |
| ENSRGLG00000002712  | cdc42ep1a      | CDG4 effector protein (Rho GTPase binding) 1a [Source:ZFIN;Acc:ZDB-GENE-121128-3]                | 3.374649178 | 1.140165167  | -0.616382184 | 1.161886541  |
| ENSRGLG00000017217  | MEP1B          | mesprin A subunit beta [Source:HGNC Symbol;Acc:HGNC:7020]                                        | 6.730845105 | -11.31815299 | -6.593030314 | 11.45647763  |
| ENSRGLG00000012539  | hrl1           | Kruppel-like factor 17 [Source:ZFIN;Acc:ZDB-GENE-010129-1]                                       | 5.744249129 | 0.135524002  | -3.207883082 | 2.401326985  |
| ENSRGLG00000015821  | -              | -                                                                                                | 3.7037371   | -1.190263554 | -0.775469573 | -            |
| ENSRGLG00000016642  | lam84a         | family with sequence similarity 84 member A [Source:NCBI gene;Acc:101174970]                     | 5.641135781 | 2.499514647  | -0.74099073  | 2.401116634  |

|                     |           |                                                                                                     |             |              |              |              |
|---------------------|-----------|-----------------------------------------------------------------------------------------------------|-------------|--------------|--------------|--------------|
| ENSRGLG00000006029  | ndc3      | N-deacetylase/N-sulfotransferase (heparan glucosaminyl) 3 [Source:ZFIN;Acc:ZDB-GENE-090312-189]     | 3.65271495  | 0.913276734  | -4.35435922  | -0.695514752 |
| ENSRGLG00000009533  | lgmn      | leu-glycine aminopeptidase [Source:NCBI gene;Acc:101163371]                                         | 4.701500574 | 0.253352104  | -4.767591589 | -0.31895838  |
| ENSRGLG000000009933 | arg2      | arginase 2 [Source:ZFIN;Acc:ZDB-GENE-090131-1334]                                                   | 4.781815136 | 0.546970263  | -3.743513466 | 0.491738702  |
| ENSRGLG00000000967  | -         | -                                                                                                   | 7.644735293 | 2.694762566  | -5.356201522 | -0.405743881 |
| ENSRGLG00000013810  | -         | -                                                                                                   | 6.697046068 | 1.897526888  | -5.178992585 | -0.375845401 |
| ENSRGLG00000000960  | -         | -                                                                                                   | 15.68064055 | 0.00         | -15.80063533 | 0.0          |
| ENSRGLG00000004077  | glax2     | 5-aminolevulinate synthase, erythroid-specific, mitochondrial [Source:NCBI gene;Acc:100049501]      | 6.29557672  | 0.671191826  | -4.352806609 | 1.272064175  |
| ENSRGLG00000000700  | -         | -                                                                                                   | 6.853184413 | 1.002907168  | -3.048617039 | 1.804724783  |
| ENSRGLG00000000678  | trmt3a    | tropinon T, fast skeletal muscle isoforms [Source:NCBI gene;Acc:101157127]                          | 6.587476683 | 1.499037608  | -6.11879836  | -1.0298783   |
| ENSRGLG00000013930  | malfb     | oncogene homolog Bb [Source:ZFIN;Acc:ZDB-GENE-010655-4]                                             | 4.685064799 | 1.832261703  | -3.009594729 | -0.156306813 |
| ENSRGLG00000010760  | -         | -                                                                                                   | 5.49645753  | -1.057892327 | -3.857719551 | 2.697048771  |
| ENSRGLG00000011630  | -         | -                                                                                                   | 7.595785497 | 3.261600213  | -4.032128454 | 3.02528288   |
| ENSRGLG00000015985  | -         | -                                                                                                   | 6.302628336 | 0.004748658  | -3.478952543 | 2.819411164  |
| ENSRGLG00000006954  | mmp25b    | matrix metalloproteinase 25b [Source:ZFIN;Acc:ZDB-GENE-100308-4]                                    | 5.605909098 | 2.94362532   | -3.061523891 | -0.386665612 |
| ENSRGLG00000016348  | -         | -                                                                                                   | 4.272149821 | -0.032756486 | -24.58458601 | 0.069545448  |
| ENSRGLG00000010229  | konj13    | potassium inwardly-rectifying channel, subfamily 1, member 13 [Source:ZFIN;Acc:ZDB-GENE-070124-1]   | 4.987826839 | 2.153151861  | -4.132808782 | -1.297648452 |
| ENSRGLG0000001254   | -         | -                                                                                                   | 1.54856431  | -0.328293    | -3.879836083 | 2.001957895  |
| ENSRGLG00000009896  | hoxc13a   | homeobox C13 [Source:NCBI gene;Acc:101172814]                                                       | 4.959653286 | -1.051186244 | -4.418370073 | 2.592947202  |
| ENSRGLG00000006812  | -         | -                                                                                                   | 2.811714711 | 2.61497375   | -15.68852161 | -15.49179208 |
| ENSRGLG00000012266  | pl81      | elastin-1 [Source:NCBI gene;Acc:101168586]                                                          | 4.707790283 | 0.194524432  | -3.452981566 | 1.060769847  |
| ENSRGLG00000006922  | -         | -                                                                                                   | 7.184633081 | 1.456901167  | -4.997437283 | 1.00796874   |
| ENSRGLG00000001052  | sicker-4g | stafase-1 [Source:NCBI gene;Acc:101156080]                                                          | 5.872529451 | 1.721471199  | -3.528729587 | 0.622811946  |
| ENSRGLG00000000959  | rhh       | ras homolog family member H [Source:ZFIN;Acc:ZDB-GENE-060228-7]                                     | 16.26812344 | 13.18025262  | -3.024804484 | 0.06353741   |
| ENSRGLG00000009587  | pvab1 (1) | parvalbumin beta [Source:NCBI gene;Acc:105353532]                                                   | 5.928888408 | -0.56628185  | -2.740173716 | -0.746517906 |
| ENSRGLG00000013851  | konj16    | potassium inwardly-rectifying channel, subfamily 1, member 16 [Source:ZFIN;Acc:ZDB-GENE-130603-81]  | 5.980046509 | -11.66614854 | -7.003876201 | 10.64283683  |
| ENSRGLG00000012148  | ogal      | O-GlcNAcase like [Source:ZFIN;Acc:ZDB-GENE-110914-153]                                              | 3.278464098 | -1.099027421 | -3.455158196 | 0.922969118  |
| ENSRGLG00000015998  | -         | -                                                                                                   | 2.923409173 | -12.82939858 | -6.616321963 | 12.13889501  |
| ENSRGLG00000016135  | rab25b    | RAB25, member RAS oncogene family [Source:NCBI gene;Acc:101172728]                                  | 4.468364823 | 1.164819041  | -3.2570795   | 0.046951516  |
| ENSRGLG00000012439  | col9b     | chondromucopolysaccharin 9B receptor Bb [Source:ZFIN;Acc:ZDB-GENE-070301-3]                         | 4.971399848 | -0.121162999 | -3.169039659 | 1.924029293  |
| ENSRGLG00000015459  | -         | -                                                                                                   | 5.785536014 | 1.22045387   | -3.050392135 | 1.515205243  |
| ENSRGLG00000009593  | vill      | villin-like [Source:ZFIN;Acc:ZDB-GENE-081222-1]                                                     | 5.437087028 | -0.637315021 | -3.217177521 | 2.857713792  |
| ENSRGLG00000014843  | cs        | complement C8 [Source:NCBI gene;Acc:101156293]                                                      | 5.784657513 | 0.88151458   | -4.717575453 | 3.03235527   |
| ENSRGLG00000012551  | -         | -                                                                                                   | 5.462520903 | 0.822024682  | -4.610292482 | 0.489376388  |
| ENSRGLG00000016840  | shdb      | Src homolog 2 domain containing transforming protein D, beta [Source:ZFIN;Acc:ZDB-GENE-090131-6059] | 3.507133899 | 0.483387053  | -3.209671168 | -0.18441982  |
| ENSRGLG00000013436  | col10     |                                                                                                     |             |              |              |              |

|                     |            |                                                                                                                                    |              |              |              |              |
|---------------------|------------|------------------------------------------------------------------------------------------------------------------------------------|--------------|--------------|--------------|--------------|
| ENSORLG0000004055   | -          | -                                                                                                                                  | 5.350158156  | 1.429022214  | -3.953125206 | -0.031504297 |
| ENSORLG0000001329   | -          | -                                                                                                                                  | 5.779963401  | 0.766907223  | -1.451477261 | 3.562062621  |
| ENSORLG00000006354  | gact3      | gamma-glutamylamine cyclotransferase tandem duplicate 3 [Source:ZFIN;Acc:ZDB-GENE-07024-26]                                        | 3.604489302  | 0.887490644  | -1.00972091  | 1.707762959  |
| ENSORLG00000011757  | pdact1     | phosphotyrosine interaction domain containing 1 [Source:ZFIN;Acc:ZDB-GENE-050320-72]                                               | 4.180328707  | 2.614278165  | -0.73109802  | 0.835437606  |
| ENSORLG00000004895  | hic1       | hypermethylated in cancer 1 [Source:ZFIN;Acc:ZDB-GENE-040713-7]                                                                    | 4.741297515  | 2.907140123  | -2.173408291 | -0.338765767 |
| ENSORLG00000011311  | tbc1d4     | TBC1 domain family, member 4 [Source:ZFIN;Acc:ZDB-GENE-030313-9881]                                                                | 3.105703903  | 0.375095999  | -1.492734903 | 1.238357772  |
| ENSORLG00000000313  | lyg2       | lysyzyme g-like 2 [Source:ZFIN;Acc:ZDB-GENE-090917-2]                                                                              | 5.685368891  | 1.487572301  | -3.276936994 | 0.921344511  |
| ENSORLG00000018096  | TWIST2     | twist family bHLH transcription factor 2 [Source:HGNC;Symbol:AC:HGNC:20670]                                                        | 15.762701521 | 10.35208758  | -1.455523256 | 3.953570942  |
| ENSORLG00000000284  | cdkn1a     | cyclin-dependent kinase inhibitor 1A [Source:ZFIN;Acc:ZDB-GENE-070705-7]                                                           | 5.227381405  | 3.108232557  | -0.754840374 | 1.364703844  |
| ENSORLG00000000766  | -          | -                                                                                                                                  | 4.75727743   | 0.474807678  | -1.532013667 | 2.750940244  |
| ENSORLG00000007590  | ablim3     | actin binding LIM protein family member 3 [Source:NCBI;Gene:Acc:101163501]                                                         | 4.230484184  | 2.434513239  | -0.446114891 | 1.350341683  |
| ENSORLG000000003978 | -          | -                                                                                                                                  | 7.503131872  | 2.312603074  | -2.063745843 | 3.12767557   |
| ENSORLG00000010657  | itga4      | integrin alpha 4 [Source:ZFIN;Acc:ZDB-GENE-110411-108]                                                                             | 4.352232263  | 2.549889993  | -0.103445409 | 1.699384458  |
| ENSORLG00000002702  | MLL7       | MLL7, PHD finger containing [Source:HGNC;Symbol:AC:HGNC:7138]                                                                      | 4.737098759  | 2.265162846  | -1.39494871  | 1.13292543   |
| ENSORLG00000007298  | MED13L     | mediator complex subunit 13 like [Source:HGNC;Symbol:AC:HGNC:72982]                                                                | 4.139505453  | 2.679371442  | -0.890273025 | 0.570344163  |
| ENSORLG00000008655  | -          | -                                                                                                                                  | 6.408040617  | 0.107438137  | -2.136945974 | 4.254138552  |
| ENSORLG00000012052  | dusp10     | dual specificity phosphatase 10 [Source:NCBI;Gene:Acc:101157461]                                                                   | 4.547304711  | -0.093404811 | -2.269417947 | 2.395778153  |
| ENSORLG00000018040  | zfye1      | zinc finger, FYVE domain containing 1 [Source:ZFIN;Acc:ZDB-GENE-131205-11]                                                         | 3.097006405  | 0.319031757  | -1.502860749 | 1.275598050  |
| ENSORLG00000014020  | -          | -                                                                                                                                  | 17.89539351  | 10.05765334  | -3.894958716 | 3.968713939  |
| ENSORLG00000015720  | zgc:77158  | solute carrier family 45 member 3 [Source:NCBI;Gene:Acc:101158020]                                                                 | 3.051235891  | 1.52042647   | -0.405072949 | 1.18220617   |
| ENSORLG00000003284  | mrc2       | marinadin receptor, C type 2 [Source:ZFIN;Acc:ZDB-GENE-090935-3]                                                                   | 4.464168338  | 1.696473609  | -1.778477316 | 0.987702796  |
| ENSORLG00000015457  | amot2a     | angiominin-like 2 [Source:NCBI;Gene:Acc:101161303]                                                                                 | 3.640737722  | 1.750838431  | -1.190847689 | 0.107036684  |
| ENSORLG00000013899  | nkd1       | naked outside homolog 1 (Drosophila) [Source:ZFIN;Acc:ZDB-GENE-061108-3]                                                           | 4.466597977  | 2.327577117  | -0.782596453 | 1.356908355  |
| ENSORLG00000002521  | treh       | trehalase (brush-border membrane glycoprotein) [Source:ZFIN;Acc:ZDB-GENE-070912-34]                                                | 5.817790829  | -0.278056841 | -3.328409124 | 2.767942007  |
| ENSORLG00000005426  | -          | -                                                                                                                                  | 5.177969434  | 2.651738019  | -0.302146453 | 2.224569589  |
| ENSORLG00000010182  | post3a     | microsomal glutathione S-transferase 3 [Source:NCBI;Gene:Acc:101173739]                                                            | 3.528937529  | 0.54666173   | -1.813279778 | 1.164980765  |
| ENSORLG00000016196  | rgl2       | ral guanine nucleotide dissociation stimulator-like 2 [Source:ZFIN;Acc:ZDB-GENE-010311-1]                                          | 4.740882991  | 1.169571299  | -2.315995011 | 1.255801173  |
| ENSORLG00000000345  | palld      | paladin, cytoskeletal associated protein [Source:ZFIN;Acc:ZDB-GENE-041014-252]                                                     | 3.170825942  | 1.387923528  | -1.854360395 | -0.070793066 |
| ENSORLG000000007531 | -          | -                                                                                                                                  | 4.460977255  | 2.989400836  | -0.60919428  | 0.82868662   |
| ENSORLG00000006858  | wsc2f2     | WSC domain containing 2 [Source:NCBI;Gene:Acc:101154729]                                                                           | 4.812573275  | 3.100158566  | 0.665668975  | 2.378567539  |
| ENSORLG00000002386  | hfp2a      | LHFPL tetraspan subfamily member 2 [Source:NCBI;Gene:Acc:101175331]                                                                | 5.007506323  | 0.801721136  | -2.745868992 | 1.45039635   |
| ENSORLG00000010137  | olq6c      | Oryzias latipes membrane quanyin/ cyclase (olq6), mRNA [Source:RefSeq; mRNA:Acc:NM_001105096]                                      | 5.201526252  | -0.061060329 | -3.062309429 | 2.200709879  |
| ENSORLG00000016366  | atger1b    | prostaglandin E receptor 1b (subtype EP1) [Source:ZFIN;Acc:ZDB-GENE-100922-278]                                                    | 5.305527367  | 2.982718688  | -1.172612331 | 1.150679578  |
| ENSORLG00000010292  | ednr       | Oryzias latipes endothelin receptor (ednr), mRNA [Source:RefSeq; mRNA:Acc:NM_001104944]                                            | 3.589089737  | 2.350690704  | -2.12977851  | -0.899003096 |
| ENSORLG00000005147  | pdha1b     | prolyl 4-hydroxylase, alpha polypeptide 1b [Source:ZFIN;Acc:ZDB-GENE-030313-4089]                                                  | 3.08494512   | 1.718995483  | -1.01199675  | 1.245164462  |
| ENSORLG0000001065   | -          | -                                                                                                                                  | 16.37684625  | 0            | -3.104679259 | 1.727265748  |
| ENSORLG00000010473  | serpin1e   | serpin peptidase inhibitor, clade E (nexin, plasminogen activator inhibitor type 1), member 1 [Source:ZFIN;Acc:ZDB-GENE-070912-60] | 5.137394453  | 1.058556847  | -3.442300203 | 0.637023042  |
| ENSORLG00000012347  | gsna       | galactin a [Source:ZFIN;Acc:ZDB-GENE-030131-9653]                                                                                  | 5.678829151  | 1.582324287  | -2.625587729 | 1.471402075  |
| ENSORLG00000000728  | slpava     | plasmalemma vesicle associated protein a [Source:ZFIN;Acc:ZDB-GENE-070912-432]                                                     | 4.839380401  | 0.772399219  | -2.298946251 | 1.768526123  |
| ENSORLG00000003335  | -          | -                                                                                                                                  | 5.441172113  | 3.12490293   | -2.47179287  | -0.155041106 |
| ENSORLG00000012922  | znp1a3     | patatin-like phospholipase domain containing 3 [Source:ZFIN;Acc:ZDB-GENE-040718-27]                                                | 3.972029247  | 0.870727382  | -1.571956368 | 1.530189951  |
| ENSORLG000000007531 | -          | -                                                                                                                                  | 3.20871299   | 2.277090599  | 0.540690656  | 1.478189575  |
| ENSORLG000000004491 | form11a    | formin-like 1a [Source:ZFIN;Acc:ZDB-GENE-120215-83]                                                                                | 4.314908271  | 3.347707238  | -0.486541551 | 0.4811435    |
| ENSORLG00000011631  | fox2       | forkhead box f2 [Source:ZFIN;Acc:ZDB-GENE-100922-240]                                                                              | 5.348232584  | 2.23647502   | -1.519694421 | 1.595242394  |
| ENSORLG00000016558  | cdap2      | CTD (carboxy-terminal domain, RNA polymerase II, polypeptide A) small phosphatase 2 [Source:ZFIN;Acc:ZDB-GENE-030313-184]          | 3.742696975  | 1.580812455  | -0.934269977 | 1.228099406  |
| ENSORLG00000029710a | znf710a    | zinc finger protein 710a [Source:ZFIN;Acc:ZDB-GENE-030313-5559]                                                                    | 3.415161177  | 2.231829341  | -1.13092022  | 0.0059122    |
| ENSORLG00000010300  | czry2.1    | chemokine receptor P2Y2 tandem duplicate 1 [Source:ZFIN;Acc:ZDB-GENE-980526-196]                                                   | 7.409780652  | 1.393489669  | -2.497097208 | 3.519670965  |
| ENSORLG00000004345  | ctch1      | catched 1 [Source:ZFIN;Acc:ZDB-GENE-980526-196]                                                                                    | 3.933040399  | 0.640298977  | -1.971753314 | 1.320842973  |
| ENSORLG00000014046  | nox1       | NADPH oxidase 1 [Source:NCBI;Gene:Acc:101164470]                                                                                   | 3.112440782  | -0.498468638 | -2.262183364 | 1.34921193   |
| ENSORLG00000011229  | -          | -                                                                                                                                  | 4.917018912  | 1.533206006  | -0.61224257  | 2.72055106   |
| ENSORLG00000012104  | spn3       | serine palmitoyltransferase, long chain base subunit 3 [Source:ZFIN;Acc:ZDB-GENE-041210-281]                                       | 5.834337152  | 0.897778887  | -2.1187432   | 2.818300532  |
| ENSORLG00000005691  | zgc:110239 | zgc:110239 [Source:ZFIN;Acc:ZDB-GENE-050417-107]                                                                                   | 4.541495711  | 0.799816903  | -2.40239985  | 1.339223831  |
| ENSORLG00000017277  | prng2      | proline rich G1a (G-carboxy glutamic acid) 2 [Source:ZFIN;Acc:ZDB-GENE-130625-11]                                                  | 4.762755279  | 0.993178675  | -3.313308647 | 0.45679329   |
| ENSORLG00000012137  | -          | -                                                                                                                                  | 3.062818544  | 2.518478128  | 0.797199049  | 1.342025712  |
| ENSORLG00000018358  | -          | -                                                                                                                                  | 4.420920927  | 1.0010576    | -1.567491403 | 1.852029426  |
| ENSORLG00000016759  | -          | -                                                                                                                                  | 5.593502544  | 0.967504878  | -1.934753511 | 2.691728837  |
| ENSORLG00000010228  | slmapb     | sarcolemma associated protein b [Source:ZFIN;Acc:ZDB-GENE-040426-809]                                                              | 5.537730826  | 2.549148464  | -0.425682325 | 2.563385569  |
| ENSORLG00000015782  | mep1a.1    | meprin A, alpha (PABA peptide hydrolase), tandem duplicate 1 [Source:ZFIN;Acc:ZDB-GENE-041001-209]                                 | 4.378564929  | -5.053593186 | -5.733110727 | 3.699521199  |
| ENSORLG00000002046  | coro1a     | coronin, actin binding protein, 1A [Source:ZFIN;Acc:ZDB-GENE-030313-9512]                                                          | 5.037735711  | 2.33044145   | -2.748681375 | -0.040902138 |

|                     |                                                              |                                                                                                                                              |             |              |              |              |
|---------------------|--------------------------------------------------------------|----------------------------------------------------------------------------------------------------------------------------------------------|-------------|--------------|--------------|--------------|
| ENSORLG00000013801  | gprc5c                                                       | G protein-coupled receptor, class C, group 5, member C [Source:ZFIN;Acc:ZDB-GENE-070928-27]                                                  | 6.303697649 | 0.280613501  | -3.513205747 | 2.510363198  |
| ENSORLG000000008674 | cltgn9                                                       | Cla and TNF related 9 [Source:ZFIN;Acc:ZDB-GENE-060303-33]                                                                                   | 17.05716297 | 0            | -17.05715778 | 0            |
| ENSORLG00000015708  | sidcyp-1                                                     | complement C1q-like protein 4 [Source:NCBI;Gene:Acc:101168564]                                                                               | 5.73357242  | 2.523182233  | -3.942717943 | -0.731301938 |
| ENSORLG000000008010 | -                                                            | -                                                                                                                                            | 17.3258941  | 10.40590729  | -5.582361985 | 1.338000905  |
| ENSORLG00000010231  | GOS2                                                         | G0/G1 switch 2 [Source:NCBI;Gene:Acc:10156885]                                                                                               | 5.463242754 | -0.523011866 | -0.50165341  | 0.848503973  |
| ENSORLG00000009993  | slc15a2                                                      | solute carrier family 15 (oligopeptide transporter), member 2 [Source:ZFIN;Acc:ZDB-GENE-030131-5866]                                         | 5.057322275 | 1.274697482  | -3.374659158 | 0.408450788  |
| ENSORLG0000001819   | ergo2                                                        | Oryzias latipes estrogen-related receptor gamma type 2 (erg2), mRNA [Source:RefSeq; mRNA:Acc:NM_001163092]                                   | 4.21523115  | 0.83549377   | -3.447870318 | -0.067613644 |
| ENSORLG00000007994  | sox8a                                                        | SOX (sex determining region Y)-box 8a [Source:ZFIN;Acc:ZDB-GENE-130530-719]                                                                  | 2.68151378  | 0.466831406  | -3.126767415 | -0.911600131 |
| ENSORLG00000012050  | slc1a1                                                       | solute carrier family 1 (neuronal/spinophil high affinity glutamate transporter, system Xag), member 1 [Source:ZFIN;Acc:ZDB-GENE-040719-414] | 5.12811671  | 0.521278599  | -3.155361974 | 1.451959586  |
| ENSORLG00000004253  | pdgfrf                                                       | platelet derived growth factor receptor like [Source:NCBI;Gene:Acc:101185739]                                                                | 5.579981562 | -1.295697799 | -5.173881386 | 1.702292391  |
| ENSORLG00000009061  | batf                                                         | basic leucine zipper ATF-like transcription factor [Source:NCBI;Gene:Acc:101186259]                                                          | 6.84693847  | 1.022954149  | -6.840484149 | -0.015961426 |
| ENSORLG00000011787  | myt3                                                         | myosin, light polypeptide 3, skeletal muscle [Source:ZFIN;Acc:ZDB-GENE-000322-6]                                                             | 4.771746489 | -12.47791891 | -5.769103159 | 11.48232395  |
| ENSORLG000000010189 | pdgfrf                                                       | platelet derived growth factor receptor like [Source:NCBI;Gene:Acc:101185739]                                                                | 5.402077038 | -1.397813519 | -5.84119985  | 1.052216425  |
| ENSORLG00000004731  | zgc:13646f                                                   | zgc:13646f [Source:ZFIN;Acc:ZDB-GENE-060519-7]                                                                                               | 15.69803495 | 9.946892855  | -3.581066636 | 2.322739529  |
| ENSORLG00000000391  | zgc:13646f                                                   | zgc:13646f [Source:ZFIN;Acc:ZDB-GENE-060519-7]                                                                                               | 7.267892041 | 1.455280204  | -7.070466177 | -0.889033864 |
| ENSORLG00000010223  | crit1b                                                       | carminic palmityltransferase 1B (muscle) [Source:ZFIN;Acc:ZDB-GENE-041010-9]                                                                 | 8.124898429 | 3.439354748  | -6.962367758 | 0.882676438  |
| ENSORLG0000001706   | uncharcterized LOC101160024 [Source:NCBI;Gene:Acc:101160024] |                                                                                                                                              | 16.1307637  | 9.747504889  | -16.14307117 | -9.747521673 |
| ENSORLG00000008238  | gamt                                                         | guanidinoacetate N-methyltransferase [Source:NCBI;Gene:Acc:101166291]                                                                        | 4.533128724 | 0.949191952  | -4.543617479 | -0.489926271 |
| ENSORLG00000000349  | sich211                                                      | uncharacterized LOC101172412 [Source:NCBI;Gene:Acc:101172412]                                                                                | 5.694387284 | 0.990345661  | -6.374361432 | 1.030116517  |
| ENSORLG00000010410  | chp2                                                         | calionormin-like EF-hand protein 2 [Source:ZFIN;Acc:ZDB-GENE-030131-5810]                                                                    | 5.300496198 | 0.401587774  | -3.411665332 | 1.482738568  |
| ENSORLG00000016167  | ihh                                                          | Indian hedgehog [Source:HGNC;Symbol:AC:HGNC:5956]                                                                                            | 6.657802245 | 2.015251353  | -3.619032968 | 1.0240107    |
| ENSORLG00000011273  | col1a1b                                                      | collagen, type I, alpha 1b [Source:ZFIN;Acc:ZDB-GENE-030131-4450]                                                                            | 5.261473093 | 2.067714767  | -4.035056545 | -0.840822291 |
| ENSORLG00000015981  | myl1                                                         | myosin light chain 1, skeletal muscle isoform [Source:NCBI;Gene:Acc:101167500]                                                               | 3.741705665 | 0.234810104  | -6.041508633 | -2.5412596   |
| ENSORLG00000017246  | -                                                            | -                                                                                                                                            | 7.60558836  | 1.79908806   | -6.529461192 | -0.171386675 |
| ENSORLG000000006421 | -                                                            | -                                                                                                                                            | 5.038384624 | -0.674263864 | -4.580303358 | 1.13283015   |
| ENSORLG00000018031  | cd25a                                                        | C-C motif chemokine 20 [Source:NCBI;Gene:Acc:101171121]                                                                                      | 6.133091934 | 0.121887856  | -3.097421201 | 2.914384299  |
| ENSORLG00000000412  | slc12a3                                                      | solute carrier family 12 (sodium/chloride transporter), member 3 [Source:ZFIN;Acc:ZDB-GENE-030131-3506]                                      | 6.23948583  | -0.93596862  | -3.830559444 | 3.345371567  |
| ENSORLG00000009017  | -                                                            | -                                                                                                                                            | 6.23948583  | 0.552418671  | -6.764708255 | 0.477889539  |
| ENSORLG000000002943 | dkn11b                                                       | duad11b [Source:ZFIN;Acc:ZDB-GENE-010328-13]                                                                                                 | 18.28213443 | 0            | -4.557981041 | 13.72464404  |
| ENSORLG000000003829 | ptger4b                                                      | prostaglandin E receptor 4 (subtype EP4) [Source:ZFIN;Acc:ZDB-GENE-060531-102]                                                               | 4.96939269  | 0.902533535  | -3.44906394  | 0.618273889  |
| ENSORLG00000012333  | trib1                                                        | tribbles homolog 1 [Source:NCBI;Gene:Acc:101160746]                                                                                          | 5.102628851 | 0.469903093  | -4.134893101 | 0.498314222  |
| ENSORLG00000004268  | slc5a2                                                       | solute carrier family 5 (sodium/glucose cotransporter), member 2 [Source:ZFIN;Acc:ZDB-GENE-040426-2498]                                      | 6.037200971 | 1.129266941  | -4.383930455 | 0.52448558   |
| ENSORLG00000016178  | kneg1                                                        | potassium voltage-gated channel, subfamily G, member 1 [Source:ZFIN;Acc:ZDB-GENE-080205-5]                                                   | 1.027269997 | -4.881392599 | -3.270174554 | 2.154772477  |
| ENSORLG00000016820  | -                                                            | -                                                                                                                                            | 2.929521182 | -0.130242035 | -4.485256689 | -1.425090928 |
| ENSORLG00000017122  | gata3                                                        | GATA binding protein 3 [Source:ZFIN;Acc:ZDB-GENE-992415-82]                                                                                  | 16.6088462  | 10.56750932  | -3.292620433 | 2.749179261  |
| ENSORLG000000008649 | gpr11b                                                       | gamma-glutamyltransferase 1b [Source:ZFIN;Acc:ZDB-GENE-1114048-13]                                                                           | 4.810897244 | -0.23193759  | -3.171008543 | 1.872312403  |
| ENSORLG00000000597  | anact2b                                                      | anion channel protein 2 [Source:NCBI;Gene:Acc:101154790]                                                                                     | 4.234109248 | -3.042080343 | -3.56581957  | 3.710855364  |
| ENSORLG00000014806  | tbx4                                                         | T-box 4 [Source:NCBI;Gene:Acc:101172998]                                                                                                     | 5.365889369 | 2.973206193  | -3.781231068 | 1.388056393  |
| ENSORLG00000005938  | atp2a1                                                       | sericolplasmic/endoplasmic reticulum calcium ATPase 1 [Source:NCBI;Gene:Acc:101173864]                                                       | 4.092276847 | -0.200671653 |              |              |

|  |                    |                |                                                                                                                     |             |               |              |              |
|--|--------------------|----------------|---------------------------------------------------------------------------------------------------------------------|-------------|---------------|--------------|--------------|
|  | ENSRORG0000010564  | konk1b         | potassium two pore domain channel subfamily K member 1 [Source:NCBI gene:Acc:101174617]                             | 3.252575954 | 1.264631842   | 0.457973013  | 2.446401962  |
|  | ENSRORG0000003458  | ctnna1         | catenin (armadillo-associated) protein, alpha-like 1 [Source:ZFIN:Acc:ZDB-GENE-060531-507]                          | 3.102024917 | 0.645381562   | -0.153389284 | 2.303758738  |
|  | ENSRORG00000010246 | -              | -                                                                                                                   | 6.004844592 | 2.129377185   | -2.092467929 | 1.783483155  |
|  | ENSRORG0000000664  | cygb           | Oryzias latipes cytoglobin (cygb), mRNA, [Source:RefSeq mRNA:Acc:NM_001104768]                                      | 5.959828209 | -10.1732875   | -2.617397257 | 13.46181322  |
|  | ENSRORG0000007599  | ann            | annexin associated transmembrane protein [Source:ZFIN:Acc:ZDB-GENE-060810-59]                                       | 5.942882885 | -3.140838589  | -4.331436923 | 4.75276749   |
|  | ENSRORG00000015266 | scla0a1        | solute carrier family 40 (iron-regulated transporter), member 1 [Source:ZFIN:Acc:ZDB-GENE-000511-48]                | 5.249296406 | 1.050196737   | -2.259556433 | 1.930306069  |
|  | ENSRORG00000092121 | lhgd1          | fumaroylacetate hydrolase domain containing 1 [Source:ZFIN:Acc:ZDB-GENE-050522-448]                                 | 5.090854458 | 1.447967801   | -1.491694575 | 2.151677533  |
|  | ENSRORG0000007652  | tab212         | tab-21 like 2 [Source:NCBI gene:Acc:101157187]                                                                      | 4.863033781 | 1.035286115   | -3.03988776  | 0.788340558  |
|  | ENSRORG0000000532  | TOR4A          | tor1a family 4 member A [Source:NCBI gene:Acc:101162538]                                                            | 2.990820516 | 5.2825134     | -2.98454543  | 2.34631814   |
|  | ENSRORG0000001029  | asgrip4        | RAS guanine nucleotide exchange factor 4 [Source:ZFIN:Acc:ZDB-GENE-050419-110]                                      | 4.37816566  | 1.870986261   | -2.998472084 | -0.49807992  |
|  | ENSRORG0000006729  | emid1          | EM domain containing 1 [Source:ZFIN:Acc:ZDB-GENE-070705-49]                                                         | 3.083796942 | 2.838163064   | -1.354949066 | -1.108876175 |
|  | ENSRORG00000013443 | esr            | V-set immunoregulatory receptor [Source:ZFIN:Acc:ZDB-GENE-060929-716]                                               | 5.042224097 | 1.965590368   | -2.629755256 | 0.984373286  |
|  | ENSRORG00000005046 | -              | -                                                                                                                   | 4.148608653 | 0.913370647   | -1.999038315 | 1.236639223  |
|  | ENSRORG00000017885 | abca2          | ATP-binding cassette, sub-family A (ABC1), member 2 [Source:ZFIN:Acc:ZDB-GENE-050517-1]                             | 3.779694842 | -0.334201796  | -2.097529521 | 2.016851796  |
|  | ENSRORG0000007790  | -              | -                                                                                                                   | 16.9042197  | 14.93648982   | -2.941736899 | -0.923533594 |
|  | ENSRORG00000001563 | HLH1 (1 of m   | four and a half LIM domains 1 [Source:NCBI gene:Acc:101165816]                                                      | 4.571021166 | 2.058802372   | -2.833572879 | -0.320689111 |
|  | ENSRORG00000016902 | hfn1           | interferon induced with helicase C domain 1 [Source:ZFIN:Acc:ZDB-GENE-081104-438]                                   | 3.631466354 | 1.732742797   | 0.0861595    | 1.985368969  |
|  | ENSRORG00000013626 | kydb           | kinoylcholine dehydrogenase [Source:NCBI gene:Acc:101175588]                                                        | 5.517467317 | 0.066018334   | -2.542871114 | 2.906063539  |
|  | ENSRORG00000003917 | RBM51 (1 of m  | RNA binding motif single stranded interacting protein 1 [Source:ZFIN:Acc:ZDB-GENE-050507-590]                       | 4.814326863 | 2.283518575   | -0.390738259 | 2.140556666  |
|  | ENSRORG00000013111 | srp2           | srpB repeat containing protein, X-linked 2 [Source:ZFIN:Acc:ZDB-GENE-110411-231]                                    | 3.798080294 | 0.907436966   | -1.528398778 | 1.345454437  |
|  | ENSRORG00000013938 | -              | -                                                                                                                   | 4.168524728 | 1.777864624   | -0.406049997 | -1.985058888 |
|  | ENSRORG00000012006 | net1           | neuroepithelial cell transforming 1 [Source:NCBI gene:Acc:101160222]                                                | 3.685911158 | 1.544993564   | -2.559790216 | -0.418387706 |
|  | ENSRORG00000013121 | prickle1b      | prickle homolog 1b [Source:ZFIN:Acc:ZDB-GENE-030131-2152]                                                           | 4.824762731 | 1.174709967   | -2.05817136  | 1.592367338  |
|  | ENSRORG00000011824 | nr0b1          | nuclear receptor subfamily 0, group B, member 1 [Source:ZFIN:Acc:ZDB-GENE-030130-1]                                 | 4.044356262 | 2.457617299   | -1.266818036 | 0.320450976  |
|  | ENSRORG00000004411 | -              | -                                                                                                                   | 4.876351275 | 2.33034618    | -2.270723706 | 0.273077872  |
|  | ENSRORG00000013342 | slcf           | APBPC1 complementation factor [Source:NCBI gene:Acc:101160767]                                                      | 5.366261401 | 0.572521922   | -3.963122472 | -0.38002651  |
|  | ENSRORG00000017583 | ppp1r13ba      | protein phosphatase 1, regulatory subunit 13ba [Source:ZFIN:Acc:ZDB-GENE-030131-8895]                               | 4.225738705 | 2.727493769   | 0.506215716  | 2.004945058  |
|  | ENSRORG0000000976  | terf           | transcription factor 7 [Source:ZFIN:Acc:ZDB-GENE-050222-4]                                                          | 4.593719289 | 2.135310968   | -2.105272224 | 0.353622596  |
|  | ENSRORG00000012651 | zswim5         | zinc finger, SWIM-type containing 5 [Source:ZFIN:Acc:ZDB-GENE-030129-30]                                            | 3.239793095 | 0.492506288   | -0.813915928 | 1.932856539  |
|  | ENSRORG00000005736 | myfjfb         | myosin regulatory light chain 2, skeletal muscle isoform [Source:NCBI gene:Acc:101169321]                           | 5.696343789 | -0.182732175  | -5.255276121 | 0.62480156   |
|  | ENSRORG0000004921  | oprm1          | opioid receptor, mu 1 [Source:ZFIN:Acc:ZDB-GENE-010125-1]                                                           | 3.749913071 | -0.438533783  | -1.88460735  | 2.350494293  |
|  | ENSRORG00000014569 | -              | -                                                                                                                   | 3.311531227 | 0.275787934   | -0.936982617 | 2.099245064  |
|  | ENSRORG00000041815 | slc7a1         | solute carrier family 7 (cationic amino acid transporter + y system), member 1 [Source:ZFIN:Acc:ZDB-GENE-091116-69] | 4.981112098 | 2.043181179   | -1.82375178  | 1.114604662  |
|  | ENSRORG00000016675 | -              | -                                                                                                                   | 4.672870466 | 1.666101597   | -1.662595889 | 1.344749223  |
|  | ENSRORG00000016854 | -              | -                                                                                                                   | 4.007184909 | 1.64521913    | -0.538296282 | 1.824154328  |
|  | ENSRORG00000004543 | her9           | heparin sulfate proteoglycan 9 [Source:ZFIN:Acc:ZDB-GENE-011213-1]                                                  | 4.075295454 | 1.492989543   | -0.810864664 | 1.771926462  |
|  | ENSRORG00000015159 | marcks1b       | MARCKS-related protein [Source:NCBI gene:Acc:101173561]                                                             | 4.195399588 | 0.829567015   | -0.573315629 | 2.79299154   |
|  | ENSRORG00000009081 | -              | -                                                                                                                   | 3.908868258 | 1.91751119    | 0.34791413   | 2.339757145  |
|  | ENSRORG00000005815 | -              | -                                                                                                                   | 4.868633826 | 1.21912523    | -1.25230047  | 1.592693816  |
|  | ENSRORG00000016201 | phf1           | PHF finger protein 1 [Source:ZFIN:Acc:ZDB-GENE-100922-277]                                                          | 3.890541296 | 1.736839067   | -2.571388507 | -0.417181047 |
|  | ENSRORG00000005074 | lynu           | lymph node hyaline [Source:NCBI gene:Acc:101174251]                                                                 | 5.813915551 | 1.315302082   | -1.765212139 | 2.7338855    |
|  | ENSRORG00000017608 | cx32.3         | connexin 32.3 [Source:ZFIN:Acc:ZDB-GENE-030131-1337]                                                                | 6.489282862 | 0.411086148   | -5.396384259 | 0.682297762  |
|  | ENSRORG0000004533  | zswim1 (1 of m | zinc finger, SWIM-type containing 6 [Source:ZFIN:Acc:ZDB-GENE-060602-4]                                             | 3.46644065  | 0.445914824   | -2.077914228 | 0.943096351  |
|  | ENSRORG00000013020 | ifrs19         | tumor necrosis factor receptor superfamily, member 19 [Source:ZFIN:Acc:ZDB-GENE-030131-8760]                        | 3.8349011   | 2.51917911    | -1.090654605 | 0.225553521  |
|  | ENSRORG0000002232  | -              | -                                                                                                                   | 3.69240064  | 0.990662429   | -0.418089402 | 2.28417263   |
|  | ENSRORG00000010410 | cyth4          | cytohesin 4 [Source:ZFIN:Acc:ZDB-GENE-090624-6]                                                                     | 5.814098672 | 2.699163343   | -2.311898552 | 0.798428952  |
|  | ENSRORG00000008567 | srnp1-68n21    | srp1-68n21.9 [Source:ZFIN:Acc:ZDB-GENE-081105-100]                                                                  | 4.100083285 | 0.821463204   | -3.834292336 | -0.555187973 |
|  | ENSRORG00000012168 | ubald2         | UBA-like domain containing 2 [Source:ZFIN:Acc:ZDB-GENE-050522-185]                                                  | 4.304917621 | 1.476814004   | -0.960189184 | 1.866398909  |
|  | ENSRORG00000015493 | znf536         | zinc finger protein 536 [Source:ZFIN:Acc:ZDB-GENE-030616-624]                                                       | 3.028483692 | 0.686172356   | -0.679032156 | 1.663949413  |
|  | ENSRORG00000021247 | -              | -                                                                                                                   | 4.931220323 | 1.815779285   | -1.418041503 | 1.6978877    |
|  | ENSRORG00000009356 | myo7b          | myosin VIIb [Source:ZFIN:Acc:ZDB-GENE-121022-3]                                                                     | 3.687786829 | -0.077412624  | -1.7742831   | 1.99242311   |
|  | ENSRORG0000004341  | swa1c          | swa1 homolog C (C. elegans) [Source:ZFIN:Acc:ZDB-GENE-091204-329]                                                   | 4.216762912 | 1.63210631    | -1.396588178 | 1.188348896  |
|  | ENSRORG00000013685 | -              | -                                                                                                                   | 3.638362649 | 0.947506836   | -0.82147956  | 1.86960931   |
|  | ENSRORG00000006724 | apcd11         | adenomatous polyposis coli down-regulated 1-like [Source:ZFIN:Acc:ZDB-GENE-121022-3]                                | 7.243768143 | 0.951727312   | -1.941151608 | 4.351353483  |
|  | ENSRORG00000013459 | cxcr3.2        | chemokine (C-X-C motif) receptor 3, tandem duplicate 2 [Source:ZFIN:Acc:ZDB-GENE-041114-186]                        | 3.876178433 | 2.428704388   | -1.24994367  | 1.193965457  |
|  | ENSRORG00000005745 | PFKP (1 of m   | phosphofructokinase, platelet [Source:HGNC Symbol:Acc:HGNC:8878]                                                    | 5.144323205 | 1.028178527   | -2.27601857  | 1.840537928  |
|  | ENSRORG00000009643 | MAF            | MAP t2p transcription factor [Source:HGNC Symbol:Acc:HGNC:6776]                                                     | 5.840618696 | -0.4073680954 | -3.313485165 | 3.001299745  |
|  | ENSRORG00000016831 | -              | -                                                                                                                   | 4.706726364 | 2.037130875   | -2.66479578  | 2.496979578  |
|  | ENSRORG00000002244 | shd2b          | EH domain containing 2 [Source:NCBI gene:Acc:101167588]                                                             | 4.16102109  | 2.12139155    | -2.405960399 | -0.365793779 |
|  | ENSRORG00000004795 | tzd8a          | frizzled class receptor 8a [Source:ZFIN:Acc:ZDB-GENE-000328-3]                                                      | 4.731696484 | 1.328273772   | -1.328772895 | 2.076134939  |
|  | ENSRORG00000014087 | zbtb37         | zinc finger and BTB domain containing 37 [Source:ZFIN:Acc:ZDB-GENE-050208-621]                                      | 4.829854387 | 1.13477679    | -1.315347332 | 2.380215432  |

|            |                    |           |                                                                                                                                           |              |              |              |              |
|------------|--------------------|-----------|-------------------------------------------------------------------------------------------------------------------------------------------|--------------|--------------|--------------|--------------|
|            | ENSRORG00000000981 | slc22a7a  | solute carrier family 22 (organic anion transporter), member 7a [Source:ZFIN:Acc:ZDB-GENE-050506-52]                                      | 3.616947677  | 0.151243441  | -4.156598965 | -0.690413352 |
|            | ENSRORG00000014926 | plekhf1   | pleckstrin homology domain containing family F (with FYVE domain) member 1 [Source:ZFIN:Acc:ZDB-GENE-040426-1289]                         | 16.10239753  | 0            | -3.045397446 | 13.05749258  |
|            | ENSRORG00000006259 | bmp6      | bone morphogenetic protein 6 [Source:ZFIN:Acc:ZDB-GENE-050506-42]                                                                         | 6.149789306  | 1.140250119  | -3.104292977 | 1.96737287   |
|            | ENSRORG00000002168 | myl9f4    | myosin light chain, phosphorylatable, fast skeletal muscle 4 [Source:ZFIN:Acc:ZDB-GENE-940712-19]                                         | 6.300930238  | -0.52295267  | -10.94037035 | -4.116002126 |
|            | ENSRORG00000006554 | akab4     | AKV homeobox 4b [Source:ZFIN:Acc:ZDB-GENE-050208-140]                                                                                     | 15.70846224  | 12.17542792  | -4.387320218 | -0.858317851 |
|            | ENSRORG00000014546 | tfpia     | tissue factor pathway inhibitor 4 [Source:ZFIN:Acc:ZDB-GENE-030711-1]                                                                     | 5.106657701  | -0.189255232 | -3.008496587 | 2.340988587  |
|            | ENSRORG00000018163 | -         | -                                                                                                                                         | 5.038318823  | 0.806782899  | -15.97261637 | -1.174109194 |
|            | ENSRORG00000006079 | slc22a6i  | solute carrier family 22 member 6 [Source:NCBI gene:Acc:101168641]                                                                        | 6.877724768  | -0.701197334 | -5.630916679 | 1.948492908  |
|            | ENSRORG00000012350 | -         | -                                                                                                                                         | 4.401082028  | 1.857398939  | -4.207352604 | -1.663161792 |
|            | ENSRORG0000000293  | sich211-1 | sich211-25503 [Source:ZFIN:Acc:ZDB-GENE-141216-113]                                                                                       | 6.381571423  | 2.774737609  | -4.235439447 | -0.682119891 |
|            | ENSRORG00000010086 | CLDN5     | claudin-5 [Source:NCBI gene:Acc:101166566]                                                                                                | 4.4651649    | 1.965256725  | -3.089062028 | -0.587669066 |
| Hmt VS HmO | 128                | col4a6    | collagen, type IV, alpha 6 [Source:ZFIN:Acc:ZDB-GENE-101001-2]                                                                            | 0.287251703  | 2.191368405  | -2.625788756 | 4.529420723  |
|            | ENSRORG00000014283 | -         | -                                                                                                                                         | 2.500479142  | 0.4668972    | -0.188132305 | 3.15673938   |
|            | ENSRORG00000009459 | sema3d    | sema domain, immunoglobulin domain (Ig), short basic domain, secreted, (semaphorin) 3D [Source:ZFIN:Acc:ZDB-GENE-090715-2]                | -1.705683303 | 0.468769045  | -1.58922051  | -3.763367767 |
|            | ENSRORG00000012208 | mfs4aa    | major facilitator superfamily domain-containing protein 4A, like [Source:NCBI gene:Acc:101174826]                                         | -1.47350193  | -0.530982762 | -0.272458156 | -3.014491464 |
|            | ENSRORG00000002157 | RF0284    | small nuclear RNA SNORD74 [Source:NCBI gene:Acc:113947419]                                                                                | -12.6301037  | 5.431997698  | -1.327369848 | -4.736829599 |
|            | ENSRORG00000015517 | -         | -                                                                                                                                         | -14.26488971 | 1.614771911  | 12.87616007  | -3.00301121  |
|            | ENSRORG00000017757 | slc25a25a | calcium-binding mitochondrial carrier protein ScaMC-2.4 [Source:NCBI gene:Acc:101160000]                                                  | -2.143288501 | -0.380346537 | -3.183033465 | 3.595406764  |
|            | ENSRORG00000002282 | ace       | angiotensin I converting enzyme (peptidyl-dipeptidase 4) [Source:ZFIN:Acc:ZDB-GENE-030131-1826]                                           | -0.821939033 | 0.259856795  | -2.944695465 | -4.020606342 |
|            | ENSRORG0000001979  | paics     | phosphoribosylaminimidazole carboxylase, phosphoribosylaminimidazole succinocarboxamide synthetase [Source:ZFIN:Acc:ZDB-GENE-030131-9762] | -2.642751191 | -0.684852986 | -1.304938621 | -3.262300003 |
|            | ENSRORG00000007315 | -         | -                                                                                                                                         | -14.6541645  | 2.750223692  | -11.4743954  | -5.926507181 |
|            | ENSRORG00000011017 | -         | -                                                                                                                                         | -0.53120756  | 0.096363668  | -2.614480041 | -3.246534183 |
|            | ENSRORG00000012224 | gapdh     | glyceraldehyde-3-phosphate dehydrogenase [Source:NCBI gene:Acc:101172760]                                                                 | -0.915818234 | -0.610358232 | -2.768722823 | -3.073697303 |
|            | ENSRORG00000016951 | sh2d5     | SH2 domain containing 5 [Source:ZFIN:Acc:ZDB-GENE-060227-47]                                                                              | -2.005739197 | -0.247464437 | -1.74245824  | -3.500243016 |
|            | ENSRORG00000013213 | efcc1     | EF-hand and coiled-coil domain containing 1 [Source:ZFIN:Acc:ZDB-GENE-120813-3]                                                           | -2.563005554 | -0.333781493 | -1.497638367 | -3.726374517 |
|            | ENSRORG00000009443 | slc8a3    | solute carrier family 8 (sodium/calcium exchanger), member 3 [Source:ZFIN:Acc:ZDB-GENE-050810-1]                                          | -2.614373338 | -0.837757035 | -0.637757035 | -3.061437661 |
|            | ENSRORG00000004531 | wnr9b     | wingless-type MMTV integration site family, member 9B [Source:ZFIN:Acc:ZDB-GENE-080201-1]                                                 | 0.300509479  | 1.7883369    | -2.652759339 | -4.131601408 |
|            | ENSRORG00000013890 | -         | -                                                                                                                                         | -1.79082347  | 0.774826386  | -1.26602     |              |

|  |                     |                 |                                                                                                                                |             |              |              |              |
|--|---------------------|-----------------|--------------------------------------------------------------------------------------------------------------------------------|-------------|--------------|--------------|--------------|
|  | ENSRORG0000015441   | mss1b           | metastasis suppressor 1-like b [Source:ZFIN;Acc:ZDB-GENE-140718-4]                                                             | 3.031704816 | 1.487904905  | -2.543302119 | -0.999017259 |
|  | ENSRORG0000010488   | BCL11B (1 of 2) | B cell CLL/lymphoma 11B [Source:HGNC Symbol;Acc:HGNC:13222]                                                                    | 6.094672608 | 0.664132067  | -2.755211745 | 2.6786102    |
|  | ENSRORG0000011078   | naalad2         | N-acetylated alpha-linked acidic dipeptidase 2 [Source:ZFIN;Acc:ZDB-GENE-040426-1023]                                          | 4.030057483 | 1.940197537  | -2.128536655 | -0.038912743 |
|  | ENSRORG0000002625   | -               | -                                                                                                                              | 3.016001927 | 0.791652803  | 0.818919633  | 2.40239086   |
|  | ENSRORG0000012948   | -               | -                                                                                                                              | 4.14874275  | 0.478844031  | -2.305334339 | 1.417050266  |
|  | ENSRORG0000004734   | strom3b         | stromatin (EPB2)-like 3b [Source:ZFIN;Acc:ZDB-GENE-050417-366]                                                                 | 5.521542886 | 1.268933773  | -2.394240111 | 1.859937399  |
|  | ENSRORG0000003814   | -               | -                                                                                                                              | 3.548627883 | 1.240837214  | -1.370087421 | 1.033102882  |
|  | ENSRORG0000010220   | -               | -                                                                                                                              | 4.633682951 | 1.191332234  | -2.579670786 | 0.872688864  |
|  | ENSRORG0000000347   | trim45          | tripartite motif containing 45 [Source:ZFIN;Acc:ZDB-GENE-070912-389]                                                           | 5.079790228 | 3.276077436  | -0.627188992 | 1.177006368  |
|  | ENSRORG0000001786   | tbl1a           | Dab, reelin signal transducer homolog 1a (Drosophila) [Source:ZFIN;Acc:ZDB-GENE-060528-1]                                      | 5.070726778 | 0.583373984  | -2.656842818 | 1.83099483   |
|  | ENSRORG0000000184   | card14          | cardiac recruitment domain family member 14 [Source:ZFIN;Acc:ZDB-GENE-090310-1]                                                | 4.603639811 | 0.183570595  | -0.776472616 | 1.905073792  |
|  | ENSRORG00000008876  | TBL1XR1         | transducin beta like 1-linked receptor 1 [Source:HGNC Symbol;Acc:HGNC:29529]                                                   | 4.135552968 | 1.470526007  | -0.04434967  | 2.621165218  |
|  | ENSRORG00000006149  | col17a1b        | collagen, type XVII, alpha 1b [Source:ZFIN;Acc:ZDB-GENE-030331-7145]                                                           | 5.575936264 | 1.99105009   | -2.457254999 | 1.310117162  |
|  | ENSRORG00000003036  | -               | -                                                                                                                              | 4.658791329 | 2.756002024  | -1.498147202 | 0.475126895  |
|  | ENSRORG00000008008  | ptprc           | protein tyrosine phosphatase, receptor type, C [Source:ZFIN;Acc:ZDB-GENE-090208-585]                                           | 3.686021237 | 2.822204123  | -1.362594811 | 0.041706781  |
|  | ENSRORG00000008434  | lgr6            | Oryzias latipes leucine rich repeat containing G protein-coupled receptor 6 (lgr6), mRNA [Source:RefSeq mRNA;Acc:NM_001278833] | 6.111868967 | 2.22104577   | -1.958461978 | 1.932856697  |
|  | ENSRORG00000006341  | SLC24A4         | solute carrier family 2 member 4 [Source:NCBI gene;Acc:101158976]                                                              | 4.433611094 | 0.297475001  | -1.346718441 | 2.789903369  |
|  | ENSRORG00000017044  | ccc1            | endothelin converting enzyme 1 [Source:ZFIN;Acc:ZDB-GENE-091110-100]                                                           | 4.12692442  | 1.621562649  | -1.212024025 | 1.293822431  |
|  | ENSRORG00000016137  | ctc1b           | catched 2 [Source:ZFIN;Acc:ZDB-GENE-980526-44]                                                                                 | 4.884868797 | 0.684381466  | -1.699611643 | 2.501358558  |
|  | ENSRORG00000016787  | PW4             | clathrin 4 [Source:HGNC Symbol;Acc:HGNC:3026]                                                                                  | 3.590454517 | 0.997017148  | -1.653805486 | 0.945335176  |
|  | ENSRORG0000003985   | ITNAS           | catenin 45 [Source:HGNC Symbol;Acc:HGNC:3025]                                                                                  | 3.165298221 | 0.35696987   | -1.459158895 | 1.129232932  |
|  | ENSRORG00000014093  | si.ch211-79k3   | uncharacterized LOC101164588 [Source:NCBI gene;Acc:101164588]                                                                  | 4.757354692 | 1.16701144   | -2.327189016 | 1.263953197  |
|  | ENSRORG00000013815  | -               | -                                                                                                                              | 5.007627033 | 0.971977601  | -1.790550578 | 2.241078552  |
|  | ENSRORG00000003722  | PRSS23          | serine protease 23 [Source:HGNC Symbol;Acc:HGNC:14370]                                                                         | 3.041818839 | 2.175194161  | -0.44345203  | 0.4454203    |
|  | ENSRORG00000003079  | KHLH4           | ketch like family member 4 [Source:HGNC Symbol;Acc:HGNC:6355]                                                                  | 3.43278748  | 2.339907165  | -0.733951071 | 0.359413372  |
|  | ENSRORG00000007168  | si.ch73-17b13   | si.ch73-17b13.3 [Source:ZFIN;Acc:ZDB-GENE-081104-245]                                                                          | 3.296533361 | 1.743791383  | -1.252971173 | 3.002552441  |
|  | ENSRORG00000016519  | RAB19           | RAB19, member RAS oncogene family [Source:HGNC Symbol;Acc:HGNC:19982]                                                          | 3.751453696 | 0.422415539  | -1.270787199 | 2.100245744  |
|  | ENSRORG00000016970  | zgc:158343      | uncharacterized LOC105354811 [Source:NCBI gene;Acc:105354811]                                                                  | 4.63091467  | 1.759953906  | -1.584425504 | 1.28701987   |
|  | ENSRORG00000015008  | -               | -                                                                                                                              | 6.444445343 | 2.675049297  | -0.837676304 | 2.93211497   |
|  | ENSRORG00000000858  | pitx1           | paired-like homeodomain 1 [Source:ZFIN;Acc:ZDB-GENE-080421-3623]                                                               | 5.305718698 | 0.429706529  | -3.159373984 | 1.717124567  |
|  | ENSRORG00000011289  | tm4sf4          | transmembrane 4 like family member 4 [Source:NCBI gene;Acc:101159982]                                                          | 17.1579969  | 13.6031023   | -0.596894437 | 2.958466613  |
|  | ENSRORG00000002533  | ngfra           | nerve growth factor receptor A (NGFR superfamily, member 16) [Source:ZFIN;Acc:ZDB-GENE-050928-1]                               | 5.307748978 | -0.313696715 | -2.113268579 | 3.508662022  |
|  | ENSRORG00000004373  | -               | -                                                                                                                              | 3.100897275 | 0.318814313  | -2.465332704 | 0.317204881  |
|  | ENSRORG000000008714 | erap2           | endoplasmic reticulum aminopeptidase 2 [Source:ZFIN;Acc:ZDB-GENE-080402-6]                                                     | 3.100156026 | 2.51729911   | -0.85730033  | 1.515102929  |
|  | ENSRORG00000017946  | apoc2 (1 of 2)  | apolipoprotein D-like [Source:NCBI gene;Acc:101159982]                                                                         | 8.428454748 | 3.278859     | -20.60613079 | -15.45634896 |
|  | ENSRORG00000002855  | rida            | reactive intermediate kinase deaminase A homolog [Source:HGNC Symbol;Acc:HGNC:18997]                                           | 3.388511719 | 0.95433887   | -1.010749264 | 1.423913794  |
|  | ENSRORG00000007353  | hs3st3b1a       | heparan sulfate (glucosamine) 3-O-sulfotransferase 3b1a [Source:ZFIN;Acc:ZDB-GENE-070202-4]                                    | 3.180130515 | 1.776281828  | -0.034825223 | 2.70105381   |
|  | ENSRORG00000005181  | zgc:101540      | uncharacterized LOC101164588 [Source:NCBI gene;Acc:101164588]                                                                  | 4.929063266 | 2.498087044  | -0.650154451 | 0.768990898  |
|  | ENSRORG00000014049  | shc42e1         | short chain dehydrogenase/reductase family 42E, member 1 [Source:ZFIN;Acc:ZDB-GENE-051120-63]                                  | 3.24884381  | 0.976280857  | -1.634111425 | 1.62463686   |
|  | ENSRORG00000015156  | gabrapl2        | GABA(A) receptor-associated protein like 2 [Source:ZFIN;Acc:ZDB-GENE-040718-336]                                               | 3.096386023 | 0.971960912  | -0.019652391 | 2.105257878  |
|  | ENSRORG00000012468  | cygb1           | Oryzias latipes cytoglobin-1 (cygb1), mRNA [Source:RefSeq mRNA;Acc:NM_001104767]                                               | 3.757157462 | 1.574271953  | -2.598266401 | -0.414899543 |
|  | ENSRORG00000005881  | cyry1           | purinergic receptor P2Y1 [Source:NCBI gene;Acc:10117350]                                                                       | 4.140046394 | 2.400651003  | -0.509264314 | 1.230612376  |
|  | ENSRORG00000018030  | -               | -                                                                                                                              | 5.113148006 | 2.457468231  | -3.4867147   | -0.830552005 |
|  | ENSRORG00000008378  | -               | -                                                                                                                              | 4.50192984  | 1.290916288  | -0.117899975 | 2.19360154   |
|  | ENSRORG00000004987  | HOXA2 (1 of 2)  | homeobox A2 [Source:HGNC Symbol;Acc:HGNC:5103]                                                                                 | 5.830782083 | 1.75615232   | -3.137763496 | 0.937352101  |
|  | ENSRORG00000015772  | chma2           | cholinergic acetylcholinesterase 2 [Source:ZFIN;Acc:ZDB-GENE-090311-6]                                                         | 4.292787728 | 1.051325342  | -1.68941931  | 1.572471713  |
|  | ENSRORG00000007960  | sow9            | Oryzias latipes SRY-box 9 (sow9), mRNA [Source:RefSeq mRNA;Acc:NM_001105086]                                                   | 5.005430592 | 1.40092784   | -0.903933364 | 2.70105381   |
|  | ENSRORG00000014397  | dec1b           | Oryzias latipes DLH1 protein DCLT1 (dec1b), mRNA [Source:RefSeq mRNA;Acc:NM_001104732]                                         | 3.124964192 | 0.734544869  | -1.28474171  | 1.106156698  |
|  | ENSRORG00000011226  | TTBK2           | tau tubulin kinase 2 [Source:HGNC Symbol;Acc:HGNC:19141]                                                                       | 16.37637861 | 14.09223932  | 0.698251537  | 2.982858561  |
|  | ENSRORG00000005247  | nmt1b           | N-myristoyltransferase 1b [Source:ZFIN;Acc:ZDB-GENE-080122-3]                                                                  | 4.260409971 | -0.122546815 | -2.270166604 | 2.113351896  |
|  | ENSRORG00000006656  | ngnt1           | nestrobinin [Source:ZFIN;Acc:ZDB-GENE-090312-2001]                                                                             | 3.365264536 | 1.448374797  | -2.259011306 | -0.34169717  |
|  | ENSRORG00000015412  | -               | -                                                                                                                              | 3.254979494 | -0.075189972 | -2.065088859 | 1.26556594   |
|  | ENSRORG00000011411  | slc26a1         | solute carrier family 26 (anion exchanger), member 1 [Source:ZFIN;Acc:ZDB-GENE-070112-2182]                                    | 4.682089436 | 0.7656165    | -0.562188776 | 1.07505161   |
|  | ENSRORG00000007737  | -               | -                                                                                                                              | 3.12079547  | 0.596150677  | -1.502306663 | 1.022823122  |
|  | ENSRORG00000008895  | -               | -                                                                                                                              | 16.0118399  | 13.68818529  | -1.795017504 | 0.519061996  |
|  | ENSRORG00000010179  | -               | -                                                                                                                              | 7.015331894 | 2.36316887   | -3.115768993 | 1.536875628  |
|  | ENSRORG00000001520  | erbb3a          | erb-B2 receptor tyrosine kinase 3a [Source:ZFIN;Acc:ZDB-GENE-030916-3]                                                         | 5.203631574 | -0.760314367 | -2.097944667 | 3.866481324  |
|  | ENSRORG00000003060  | -               | -                                                                                                                              | 3.880971088 | 3.331284728  | 0.542051489  | 1.02222929   |
|  | ENSRORG00000010400  | dkk1a           | Dickkopf-related protein 1 [Source:NCBI gene;Acc:101172518]                                                                    | 18.77613667 | 12.92917332  | -8.054981061 | -2.207551292 |
|  | ENSRORG00000006345  | dkk1a           | Dickkopf-related protein 1 [Source:NCBI gene;Acc:101172518]                                                                    | 5.61781803  | 2.416988049  | -1.222940415 | 1.978378321  |
|  | ENSRORG00000002352  | si.ch1073-27b9  | ninurin 1 [Source:HGNC Symbol;Acc:HGNC:7824]                                                                                   | 5.052299924 | 2.229800006  | -2.229800006 | 0.697017078  |
|  | ENSRORG00000011579  | slc2a2          | solute carrier family 2 (facilitated glucose transporter), member 2 [Source:ZFIN;Acc:ZDB-GENE-030131-1213]                     | 6.215573509 | -9.965510147 | -16.18109304 | 0            |
|  | ENSRORG00000016244  | paqr6           | progestin and androgen receptor family member VI [Source:ZFIN;Acc:ZDB-GENE-090714-1]                                           | 3.690187879 | 0.70946628   | -0.769741331 | 2.211456419  |
|  | ENSRORG00000015348  | tsf3mp1         | tumor protein p53 inducible nuclear protein 1 [Source:ZFIN;Acc:ZDB-GENE-031018-3]                                              | 3.188448583 | 0.619156072  | -1.304679924 | 1.265097264  |

|  |                     |           |                                                                                                    |   |   |              |              |
|--|---------------------|-----------|----------------------------------------------------------------------------------------------------|---|---|--------------|--------------|
|  | ENSRORG00000006121  | HIP1R     | huntingtin interacting protein 1 related [Source:HGNC Symbol;Acc:HGNC:18415]                       | - | - | -2.735311028 | 0.343604286  |
|  | ENSRORG00000006179  | -         | -                                                                                                  | - | - | -13.7246897  | 2.064738777  |
|  | ENSRORG00000004896  | trim36    | tripartite motif containing 36 [Source:ZFIN;Acc:ZDB-GENE-040426-208]                               | - | - | -2.535936276 | 0.064998197  |
|  | ENSRORG00000013281  | frsdc1    | Fibronectin type III domain containing 1 [Source:ZFIN;Acc:ZDB-GENE-041210-332]                     | - | - | -2.646306918 | 1.156933068  |
|  | ENSRORG00000003884  | sparrn    | sparrn a [Source:ZFIN;Acc:ZDB-GENE-080204-37]                                                      | - | - | -2.808609497 | 0.139436253  |
|  | ENSRORG0000001421   | had17b12  | very-long-chain 3-oxoacyl-CoA reductase-A [Source:NCBI gene;Acc:101169871]                         | - | - | -2.438539371 | 0.439549228  |
|  | ENSRORG0000001250   | -         | -                                                                                                  | - | - | -1.079953855 | 0.389446044  |
|  | ENSRORG00000009491  | -         | -                                                                                                  | - | - | 0.075374901  | -2.819165438 |
|  | ENSRORG0000013850   | -         | -                                                                                                  | - | - | 0            | 16.57310875  |
|  | ENSRORG000000005138 | tmem59l   | Transmembrane protein 59-like [Source:ZFIN;Acc:ZDB-GENE-040426-2651]                               | - | - | -2.324066877 | -0.535234965 |
|  | ENSRORG00000013937  | whra      | whirlin a [Source:ZFIN;Acc:ZDB-GENE-091118-27]                                                     | - | - | -2.947202544 | 0.479664304  |
|  | ENSRORG00000004446  | -         | -                                                                                                  | - | - | -2.315924207 | -0.62540149  |
|  | ENSRORG00000010629  | -         | -                                                                                                  | - | - | -2.18467463  | 0.52637177   |
|  | ENSRORG00000017074  | -         | -                                                                                                  | - | - | 0            | 16.688207028 |
|  | ENSRORG00000004421  | tiam1a    | T cell lymphoma invasion and metastasis 1a [Source:ZFIN;Acc:ZDB-GENE-080205-1]                     | - | - | -2.76449593  | 0.1030441    |
|  | ENSRORG00000008540  | -         | -                                                                                                  | - | - | -13.09797943 | 3.454230434  |
|  | ENSRORG0000014822   | hook1     | hook microtubule-tethering protein 1 [Source:ZFIN;Acc:ZDB-GENE-041001-159]                         | - | - | -2.871233963 | -0.22362444  |
|  | ENSRORG0000002643   | -         | -                                                                                                  | - | - | -10.71312012 | 5.476364924  |
|  | ENSRORG00000008840  | -         | -                                                                                                  | - | - | -1.375583388 | -0.412406289 |
|  | ENSRORG00000003789  | nhr6b     | neuronal hexamer b [Source:ZFIN;Acc:ZDB-GENE-120329-2]                                             | - | - | -3.13030778  | 1.60441269   |
|  | ENSRORG00000003971  | -         | -                                                                                                  | - | - | -12.4455738  | 14.0556133   |
|  | ENSRORG00000007317  | -         | -                                                                                                  | - | - | -6.441042328 | 1.85125459   |
|  | ENSRORG000000005323 | PHYHPL    | Phytanoyl-CoA 2-hydroxylase interacting protein like [Source:HGNC Symbol;Acc:HGNC:29378]           | - | - | -1.94286313  | -0.122854449 |
|  | ENSRORG00000001493  | rbpsm2b   | RNA binding protein, mRNA processing factor 2b [Source:ZFIN;Acc:ZDB-GENE-040426-141]               | - | - | -2.744466878 | -1.07172009  |
|  | ENSRORG00000015274  | -         | -                                                                                                  | - | - | -2.401036136 | -0.964237006 |
|  | ENSRORG000000014327 | -         | -                                                                                                  | - | - | -1.48965657  | 3.6442434    |
|  | ENSRORG00000015010  | slc27a1b  | solute carrier family 27 (fatty acid transporter), member 1b [Source:ZFIN;Acc:ZDB-GENE-081013-672] | - | - | 3.527512955  | 8.817929831  |
|  | ENSRORG00000003043  | dup2      | Dual specificity phosphatase 2 [Source:ZFIN;Acc:ZDB-GENE-040801-188]                               | - | - | -1.254562615 | -1.68997616  |
|  | ENSRORG00000013559  | cdh4      | cadherin 4, type 1, R-cadherin (retinal) [Source:ZFIN;Acc:ZDB-GENE-091207-1]                       | - | - | -2.61603149  | 0.888887269  |
|  | ENSRORG0000007432   | alch3b2   | aldehyde dehydrogenase 3 family, member B2 [Source:ZFIN;Acc:ZDB-GENE-060631-79]                    | - | - | -4.269338951 | 1.546709381  |
|  | ENSRORG00000017271  | -         | -                                                                                                  | - | - | -2.511182606 | 0.511560734  |
|  | ENSRORG00000006857  | zgc:92313 | uncharacterized LOC101164588 [Source:ZFIN;Acc:ZDB-GENE-040718-339]                                 | - | - | -0.844089213 | -0.086071511 |

|  |                     |                |                                                                                                                |             |              |              |              |
|--|---------------------|----------------|----------------------------------------------------------------------------------------------------------------|-------------|--------------|--------------|--------------|
|  | ENSRGLG00000006570  | znf503         | zinc finger protein 503 [Source:NCBI gene:Acc:101174213]                                                       | 5.87054366  | 1.786424017  | -2.55587031  | 1.528735162  |
|  | ENSRGLG00000002122  | -              | scdram/cosasum transporting ATPase subunit alpha-1 [Source:NCBI gene:Acc:100049445]                            | 5.249745539 | -0.008755089 | -3.097511346 | 2.161494126  |
|  | ENSRGLG00000001308  | paplnb         | papilin b, proteoglycan-like sulfated glycoprotein [Source:ZFIN:Acc.ZDB:GENE-030131-6023]                      | 16.52344327 | 12.52889115  | -6.26591041  | -2.631569238 |
|  | ENSRGLG00000006382  | -              | -                                                                                                              | 4.832596557 | 1.051136717  | -2.634716364 | 1.147167457  |
|  | ENSRGLG00000001661  | -              | -                                                                                                              | 4.886551903 | 0.454371224  | -1.882984151 | 2.549701016  |
|  | ENSRGLG000000013715 | fbx14b         | F-box and leucine-rich repeat protein 14b [Source:ZFIN:Acc.ZDB:GENE-030131-3556]                               | 3.226175201 | 1.419173621  | 0.102454989  | 1.911941311  |
|  | ENSRGLG00000001758  | s1rkey-11e3    | uncharacterized LOC101167627 [Source:NCBI gene:Acc:101167627]                                                  | 16.75467602 | 11.36132923  | -3.371944118 | 2.021872009  |
|  | ENSRGLG000000017962 | pdtk1          | PDZ domain containing 1 [Source:NCBI gene:Acc:101175521]                                                       | 5.985818843 | -1.014378455 | -4.385094826 | 2.615569595  |
|  | ENSRGLG00000002989  | scg3           | secretogranin III [Source:ZFIN:Acc.ZDB:GENE-040426-1725]                                                       | 3.329015947 | 0.385760769  | -1.080782604 | 1.862958329  |
|  | ENSRGLG000000008481 | prse602        | serine protease 60.2 [Source:ZFIN:Acc.ZDB:GENE-050201-109]                                                     | 4.10017553  | 0.827649303  | -2.368022175 | 0.90494373   |
|  | ENSRGLG00000001193  | fbn7           | fibulin 7 [Source:ZFIN:Acc.ZDB:GENE-170130-2]                                                                  | 4.684619064 | 0.00618396   | -1.681557079 | 2.997360838  |
|  | ENSRGLG000000016858 | hts3a          | thrombospondin 3a [Source:ZFIN:Acc.ZDB:GENE-020708-3]                                                          | 5.543559857 | 2.430618486  | -1.173346305 | -0.059919766 |
|  | ENSRGLG00000007129  | swap70a        | switching 3 cell complex subunit SWAP70a [Source:ZFIN:Acc.ZDB:GENE-040426-1182]                                | 4.009748177 | 2.097141343  | -2.74690044  | -0.833808948 |
|  | ENSRGLG00000007363  | mf19b          | ring finger protein 19b [Source:ZFIN:Acc.ZDB:GENE-060503-291]                                                  | 3.220240165 | 1.560262518  | -1.256409973 | 0.404052383  |
|  | ENSRGLG000000014996 | sov11a         | SRY (sex determining region Y)-box 11a [Source:ZFIN:Acc.ZDB:GENE-980526-396]                                   | 4.267046076 | 1.090767174  | -0.743943825 | 2.42819192   |
|  | ENSRGLG00000003132  | -              | -                                                                                                              | 3.524435701 | 1.648302843  | -1.375446285 | 0.501117127  |
|  | ENSRGLG000000014858 | oxnb           | oxalitin b [Source:ZFIN:Acc.ZDB:GENE-130630-697]                                                               | 3.871963499 | 1.737979551  | -0.122245409 | 2.012406433  |
|  | ENSRGLG000000015876 | firt2          | fibronectin leucine rich transmembrane protein 2 [Source:ZFIN:Acc.ZDB:GENE-070705-267]                         | 3.988444232 | 1.880903172  | -0.809493698 | 1.298531268  |
|  | ENSRGLG000000016561 | lert4          | keratin 4 [Source:ZFIN:Acc.ZDB:GENE-000607-83]                                                                 | 5.354029522 | 0.3174975    | -2.456170917 | 2.580899722  |
|  | ENSRGLG000000017856 | myom1a         | myomesin 1a (ketermin) [Source:ZFIN:Acc.ZDB:GENE-030131-2856]                                                  | 3.859318196 | 1.354485253  | -0.421154336 | 2.084161267  |
|  | ENSRGLG00000002528  | alh3a2b        | aldehyde dehydrogenase 3 family member A2b [Source:ZFIN:Acc.ZDB:GENE-040912-103]                               | 4.914338459 | 1.26383919   | -1.309857702 | 2.341131881  |
|  | ENSRGLG000000016046 | cock3b         | coiled-coil domain-containing protein 3 [Source:NCBI gene:Acc:101181051]                                       | 4.079724625 | 1.063263111  | -2.241251    | 0.775696031  |
|  | ENSRGLG00000002699  | kirrel1b       | kirie like nephrin family adhesion molecule 1b [Source:ZFIN:Acc.ZDB:GENE-070912-173]                           | 5.9340132   | 3.262722839  | -2.274356495 | 0.397419003  |
|  | ENSRGLG000000015665 | tp63           | tumor protein p63 [Source:ZFIN:Acc.ZDB:GENE-030819-1]                                                          | 5.57250455  | 0.4641927    | -3.092036425 | 2.001507685  |
|  | ENSRGLG00000001572  | agp12          | aquaporin 12 [Source:ZFIN:Acc.ZDB:GENE-040718-310]                                                             | 3.733128124 | 1.46806992   | -2.707782521 | -0.44223912  |
|  | ENSRGLG00000005381  | lp2b           | low-density lipoprotein receptor-related protein 2 [Source:NCBI gene:Acc:101185597]                            | 4.934046992 | -0.862886931 | -2.981586165 | 2.338515437  |
|  | ENSRGLG000000013828 | s1rch211-25d12 | s1rch211-25d12.7 [Source:ZFIN:Acc.ZDB:GENE-141216-296]                                                         | 4.300760675 | 0.571681339  | -0.945786139 | 2.783780579  |
|  | ENSRGLG000000012779 | -              | -                                                                                                              | 4.232118935 | 2.000989005  | -1.311339111 | 0.92027568   |
|  | ENSRGLG000000013986 | ajoseb         | apolipoprotein Eb [Source:NCBI gene:Acc:101161673]                                                             | 4.783773504 | 2.106277451  | -1.422629449 | 1.255351915  |
|  | ENSRGLG000000016619 | my9a           | myosin light chain 9a, regulatory [Source:ZFIN:Acc.ZDB:GENE-041010-130]                                        | 3.548947692 | 1.54621575   | -0.579041653 | 1.424175084  |
|  | ENSRGLG00000003615  | s1rkey-85k7.10 | s1rkey-85k7.10 [Source:ZFIN:Acc.ZDB:GENE-160728-49]                                                            | 15.87965312 | 12.80059054  | -4.244882210 | -1.165354689 |
|  | ENSRGLG000000012464 | tgm11          | transglutaminase 1 like 1 [Source:ZFIN:Acc.ZDB:GENE-060503-139]                                                | 3.567064122 | 2.30971263   | -1.78622701  | -0.455944114 |
|  | ENSRGLG000000008514 | cd8a           | uncharacterized LOC100125537 [Source:NCBI gene:Acc:100125537]                                                  | 17.03037024 | 12.08947696  | -2.275388342 | 2.665973237  |
|  | ENSRGLG00000003278  | -              | LHP1, tetraspan subfamily member 2 protein [Source:NCBI gene:Acc:101158202]                                    | 5.45560985  | 2.207231923  | -0.323498057 | 2.925733317  |
|  | ENSRGLG000000017422 | shank3b        | SH3 and multiple ankyrin repeat domains 3b [Source:ZFIN:Acc.ZDB:GENE-041210-74]                                | 4.186868643 | 2.08834724   | -0.102086672 | 0.805760994  |
|  | ENSRGLG000000013864 | cytda          | CYD Ysine 63 deubiquitinase [Source:NCBI gene:Acc:101156964]                                                   | 6.77182471  | 0.953688042  | -2.393530582 | 2.824911832  |
|  | ENSRGLG000000017998 | mltp (1 of ma  | muscle-specific beta 1 integrin binding protein [Source:ZFIN:Acc.ZDB:GENE-030404-1]                            | 5.661279958 | 0.059613436  | -4.441423843 | 1.16071917   |
|  | ENSRGLG000000008547 | -              | -                                                                                                              | 4.059147682 | 2.170272775  | -0.469974582 | 1.419446558  |
|  | ENSRGLG000000013491 | smo2           | SPARC related modular calcium binding 2 [Source:ZFIN:Acc.ZDB:GENE-021031-5]                                    | 4.329192162 | 1.232262448  | -3.040211091 | 0.057199811  |
|  | ENSRGLG000000016141 | -              | uncharacterized LOC101171775 [Source:NCBI gene:Acc:101171775]                                                  | 5.551453163 | 0.3136944    | -2.500347349 | 2.737896572  |
|  | ENSRGLG000000004545 | PLEKH45        | pleckstrin homology domain containing A5 [Source:HGNC Symbol:Acc:HGNC:30036]                                   | 3.737729797 | 1.217776506  | -0.909520933 | 1.610916684  |
|  | ENSRGLG000000005422 | pik3cd         | phosphatidylinositol-4,5-bisphosphate 3-kinase, catalytic subunit delta [Source:ZFIN:Acc.ZDB:GENE-040426-1128] | 3.516970528 | 2.311197861  | -0.959902049 | 0.246354188  |
|  | ENSRGLG000000007824 | notum1a        | notum, palmitoleyl-protein carboxylesterase a [Source:ZFIN:Acc.ZDB:GENE-120807-2]                              | 5.617322588 | 3.250942589  | -0.235742017 | 2.131143981  |
|  | ENSRGLG000000010967 | hand2          | heart and neural crest derivatives expressed 2 [Source:ZFIN:Acc.ZDB:GENE-000511-11]                            | 16.62005053 | 12.47212979  | -1.735048934 | 2.413338151  |
|  | ENSRGLG000000010305 | ysatr1         | cystathionine synthase [Source:ZFIN:Acc.ZDB:GENE-050522-250]                                                   | 3.741861125 | -0.546116317 | -3.842709239 | 0.445751715  |
|  | ENSRGLG000000017313 | HMGCR (1 of    | 3-hydroxy-3-methylglutaryl-CoA reductase [Source:HGNC Symbol:Acc:HGNC:5006]                                    | 3.478191599 | 0.491379216  | -1.82875541  | 1.158541807  |
|  | ENSRGLG000000009916 | leap2          | liver-expressed antimicrobial peptide 2 [Source:ZFIN:Acc.ZDB:GENE-081022-131]                                  | 5.939739739 | 1.273533382  | -5.806520648 | -1.139648934 |
|  | ENSRGLG000000015700 | CAMSPA2 (c     | calmodulin regulated spectrin associated protein family member 2 [Source:HGNC Symbol:Acc:HGNC:29188]           | 3.905727571 | 2.451571624  | -0.971605886 | 0.483034375  |
|  | ENSRGLG000000013508 | ETS1           | ETS proto-oncogene 1, transcription factor [Source:HGNC Symbol:Acc:HGNC:3498]                                  | 3.744772844 | 1.731078457  | -1.110110599 | 0.890968933  |
|  | ENSRGLG000000009685 | she            | Src homology 2 domain containing E [Source:ZFIN:Acc.ZDB:GENE-090915-6]                                         | 4.452180129 | 1.880246834  | -0.738544226 | 1.83387733   |
|  | ENSRGLG000000014923 | -              | -                                                                                                              | 3.486734623 | 1.443230624  | 0.003956362  | 2.047944631  |
|  | ENSRGLG000000002085 | cdkn1db        | cyclin dependent kinase inhibitor 1C [Source:NCBI gene:Acc:101173627]                                          | 5.544733363 | 1.814162592  | -1.818631996 | 1.912423973  |
|  | ENSRGLG000000001428 | trm35          | transmembrane protein 35A [Source:NCBI gene:Acc:101185318]                                                     | 4.411773879 | 3.180310939  | 1.350868509  | 2.582815819  |
|  | ENSRGLG000000000058 | -              | -                                                                                                              | 5.128349326 | 1.855400034  | -2.216465488 | 1.05698076   |
|  | ENSRGLG000000006005 | -              | -                                                                                                              | 4.091124102 | 2.588799698  | -1.638670512 | -0.13860677  |
|  | ENSRGLG000000003591 | col5a1         | procollagen, type V, alpha 1 [Source:ZFIN:Acc.ZDB:GENE-041105-6]                                               | 4.51664439  | 1.922910016  | -3.17008089  | -0.575861785 |
|  | ENSRGLG000000011024 | endouc         | poly(U)-specific endoribonuclease-C [Source:NCBI gene:Acc:101164801]                                           | 3.965746172 | 1.8601716    | -1.803901088 | 0.302152307  |
|  | ENSRGLG000000013159 | otoc           | otocerin [Source:ZFIN:Acc.ZDB:GENE-120601-1]                                                                   | 4.311805563 | -2.218182408 | -2.399431419 | 4.221038544  |
|  | ENSRGLG000000003453 | inka1b         | family with sequence similarity 212, member Ab [Source:ZFIN:Acc.ZDB:GENE-030131-6538]                          | 3.922400857 | 0.352327789  | -1.197218108 | 2.373344885  |
|  | ENSRGLG000000013484 | sesn1          | sesn1 [Source:ZFIN:Acc.ZDB:GENE-040718-408]                                                                    | 4.07988668  | 1.321891568  | -2.743702987 | 0.005878995  |
|  | ENSRGLG00000001438  | zpc-101640     | zpc-101640 [Source:ZFIN:Acc.ZDB:GENE-041114-158]                                                               | 3.370897679 | 2.007421373  | -0.202679376 | 1.161281898  |
|  | ENSRGLG000000006161 | s1rch211-153b  | s1rch211-153b23.3 [Source:ZFIN:Acc.ZDB:GENE-141216-408]                                                        | 3.380713063 | 0.89523185   | -1.083256185 | 1.412706648  |
|  | ENSRGLG000000000288 | SUSD2          | sushi domain containing 2 [Source:HGNC Symbol:Acc:HGNC:30667]                                                  | 3.132409212 | -0.286723955 | -2.935615846 | 0.48400277   |
|  | ENSRGLG000000010756 | cyr61          | cysteine rich angiogenic inducer 61 [Source:NCBI gene:Acc:10115757]                                            | 4.42775443  | 2.262191598  | -1.395616115 | 0.770431353  |
|  | ENSRGLG000000005034 | -              | -                                                                                                              | 4.665391044 | -0.004595584 | -2.440088986 | 2.230387653  |
|  | ENSRGLG000000010786 | -              | -                                                                                                              | 4.63115794  | 1.607496873  | -0.153612915 | 2.870531598  |

|  |                      |         |                                                                                                |              |              |              |              |
|--|----------------------|---------|------------------------------------------------------------------------------------------------|--------------|--------------|--------------|--------------|
|  | ENSRGLG000000017389  | atprr   | protein tyrosine phosphatase, receptor type, r [Source:ZFIN:Acc.ZDB:GENE-101029-2]             | -1.935547812 | 0.359776844  | -0.899138881 | -3.193878315 |
|  | ENSRGLG000000004187  | -       | -                                                                                              | 2.364372005  | 6.710977083  | -4.846034603 | -9.192147038 |
|  | ENSRGLG000000010652  | pkr     | pyruvate kinase LR [Source:ZFIN:Acc.ZDB:GENE-010907-1]                                         | -2.256001185 | -0.890872401 | -2.93779855  | 4.302522443  |
|  | ENSRGLG000000005715  | ofrcp6  | extracellular calcium-sensing receptor-like [Source:NCBI gene:Acc:101174763]                   | -10.72021005 | 5.261451258  | 0            | 15.98166828  |
|  | ENSRGLG00000007527   | h2afk   | histone H2AFK [Source:NCBI gene:Acc:101160298]                                                 | -2.692616242 | 0.128056926  | -0.427688648 | -3.24781375  |
|  | ENSRGLG0000000004161 | -       | genome C-binding protein CCO110 homolog, mitochondrial [Source:NCBI gene:Acc:101164311]        | 2.927120005  | 5.038389836  | -1.584207666 | -3.680218469 |
|  | ENSRGLG000000002339  | slc1a8a | solute carrier family 1 (glutamate transporter), member 8a [Source:ZFIN:Acc.ZDB:GENE-101111-8] | -4.311127212 | 1.232718956  | -10.90918806 | -16.45304809 |
|  | ENSRGLG000000018254  | myo1b   | myosin Ib [Source:ZFIN:Acc.ZDB:GENE-030131-695]                                                | -2.524037155 | -0.430114981 | -2.55362568  | -4.646999808 |
|  | ENSRGLG000000010503  | atp8b1  | ATPase phospholipid transporting 8B1 [Source:ZFIN:Acc.ZDB:GENE-091116-14]                      | 1.281819134  | 0.612042139  | -1.535126945 | -3.428503221 |
|  | ENSRGLG000000011040  | -       | -                                                                                              | -13.8786583  | 4.523870262  | 15.25468454  | -3.156340980 |
|  | ENSRGLG000000004834  | -       | -                                                                                              | -1.713264281 | 0.173699249  | -1.27464589  | -3.161124705 |
|  | ENSRGLG000000017339  | -       | -                                                                                              | -0.948739858 | 0.130384993  | -2.598959583 | -3.677599408 |
|  | ENSRGLG000000003846  | -       | -                                                                                              | -2.950348008 | 0.785451297  | 0.652119356  | -3.08319489  |
|  | ENSRGLG000000013914  | TRIM16L | tripartite motif containing 16 like [Source:HGNC Symbol:Acc:HGNC:32870]                        | -2.115146643 | -0.570719382 | -2.277917144 | -3.821859566 |

|                    |                |                                                                                                                  |             |              |               |              |
|--------------------|----------------|------------------------------------------------------------------------------------------------------------------|-------------|--------------|---------------|--------------|
| ENSRLOG0000009694  | plcd1a         | 1-phosphatidylinositol 4,5-bisphosphate phosphohydrolase delta-1 [Source:NCBI gene:Acc:101187907]                | 3.43916398  | 1.00926502   | -0.576947422  | 1.853436852  |
| ENSRLOG0000001361  | aff4           | AF4/FMR2 family, member 4 [Source:ZFIN:Acc:ZDB-GENE-100910-5]                                                    | 3.304670106 | 0.358121226  | -1.535455502  | 1.411578151  |
| ENSRLOG0000007407  | -              | -                                                                                                                | 4.759943724 | 0.786314635  | -3.059712434  | 0.914402192  |
| ENSRLOG00000007839 | 113a1b         | coagulation factor XIII, A1 polypeptide b [Source:ZFIN:Acc:ZDB-GENE-030131-9634]                                 | 3.267768531 | 2.436857568  | -1.181395231  | -0.349993308 |
| ENSRLOG00000006917 | si.ch211-191d  | si.ch211-191d15.2 [Source:ZFIN:Acc:ZDB-GENE-040724-119]                                                          | 3.193524014 | 1.610834611  | -1.06665983   | 0.516514916  |
| ENSRLOG00000013034 | mycn           | MYCN proto-oncogene, bHLH transcription factor [Source:ZFIN:Acc:ZDB-GENE-020711-1]                               | 4.447896487 | 1.868890185  | -1.761672787  | 0.817618907  |
| ENSRLOG0000004534  | da2            | chymotrypsin-like elastase family member 2A [Source:NCBI gene:Acc:101168538]                                     | 7.624791755 | 1.916194931  | -6.019553209  | -0.31047131  |
| ENSRLOG0000001261  | sash3          | SAM and SH3 domain containing 3 [Source:ZFIN:Acc:ZDB-GENE-120411-1]                                              | 4.114263436 | 2.244308615  | -1.629684362  | 0.2407555    |
| ENSRLOG0000001384  | si.ch73-28112  | si.ch73-28112.4 [Source:ZFIN:Acc:ZDB-GENE-130530-882]                                                            | 3.087120788 | 1.354043236  | 0.689733395   | 2.423295958  |
| ENSRLOG00000008732 | nr4a3          | nuclear receptor subfamily 4 group A member 3 [Source:NCBI gene:Acc:101167731]                                   | 6.33471603  | 2.207613759  | -2.078178718  | 2.049413047  |
| ENSRLOG00000017648 | dhmt3aa        | DNA (cytosine-5-)-methyltransferase 3 alpha a [Source:ZFIN:Acc:ZDB-GENE-050314-5]                                | 4.664060599 | 1.468538813  | -1.884960654  | 1.311046307  |
| ENSRLOG00000011636 | -              | -                                                                                                                | 3.092706294 | 0.53777853   | -1.59392937   | 0.96148888   |
| ENSRLOG00000017492 | sp9            | Sp9 transcription factor [Source:NCBI gene:Acc:101162490]                                                        | 5.492717214 | -0.137475663 | -3.0498747    | 2.581702422  |
| ENSRLOG0000001322  | -              | -                                                                                                                | 4.578042768 | 1.445718514  | -0.7249722034 | 2.88308728   |
| ENSRLOG00000014341 | -              | -                                                                                                                | 4.292731708 | 1.793373361  | -1.467397973  | 1.032446064  |
| ENSRLOG00000002677 | rac3b          | Rac family small GTPase 3b [Source:ZFIN:Acc:ZDB-GENE-080270-21]                                                  | 3.13520356  | 2.191301121  | -1.750543217  | -0.806155051 |
| ENSRLOG00000015125 | -              | -                                                                                                                | 5.608513124 | 0.638457698  | -2.548949424  | 2.463915666  |
| ENSRLOG00000007584 | -              | -                                                                                                                | 3.862724723 | 1.013253856  | -2.522434378  | 0.327530773  |
| ENSRLOG00000005033 | slc34a1a       | solute carrier family 34 (type II sodium/phosphate cotransporter), member 1a [Source:ZFIN:Acc:ZDB-GENE-101006-3] | 6.094690897 | 0.354679694  | -6.933252838  | -1.192757079 |
| ENSRLOG00000011559 | pcdh1b         | protocadherin 1b [Source:ZFIN:Acc:ZDB-GENE-091015-2]                                                             | 4.947034522 | 1.858827086  | -0.998663291  | 2.091829778  |
| ENSRLOG00000009705 | -              | -                                                                                                                | 3.100681921 | 1.543365936  | -1.988176534  | -0.380376369 |
| ENSRLOG00000017543 | -              | -                                                                                                                | 6.032096323 | 3.726654399  | -0.418071292  | 1.887308206  |
| ENSRLOG0000001340  | -              | -                                                                                                                | 4.893233361 | 1.891708476  | -4.770835321  | -1.63063533  |
| ENSRLOG00000004586 | ela2l          | chymotrypsin-like elastase family member 2A [Source:NCBI gene:Acc:101168781]                                     | 7.410065549 | 2.399678539  | -5.846825611  | -0.83595371  |
| ENSRLOG00000007107 | chd3           | chromatin domain helicase DNA binding protein 3 [Source:ZFIN:Acc:ZDB-GENE-121031-4]                              | 4.911365796 | 1.786376887  | -0.916319706  | 2.209155984  |
| ENSRLOG00000016940 | ihf5           | inter-alpha-trypsin inhibitor heavy chain family, member 5 [Source:ZFIN:Acc:ZDB-GENE-041213-193]                 | 3.116657252 | 2.559702795  | -2.00915073   | -1.451736721 |
| ENSRLOG0000001392  | ker8           | keratin, type II cytoskeletal 8 [Source:NCBI gene:Acc:101168366]                                                 | 3.939186801 | 1.344866294  | -1.560414072  | 1.034391424  |
| ENSRLOG00000017048 | hoxb3a         | homeobox B3a [Source:ZFIN:Acc:ZDB-GENE-990415-104]                                                               | 6.115466673 | 0.753846706  | -3.438852147  | 1.923252633  |
| ENSRLOG00000002980 | gmt            | phosphoethanolamine methyltransferase [Source:ZFIN:Acc:ZDB-GENE-060929-740]                                      | 5.357600252 | 0.855899793  | -2.503543326  | 1.99640198   |
| ENSRLOG00000000636 | notch1b        | notch 1b [Source:ZFIN:Acc:ZDB-GENE-990415-183]                                                                   | 4.086384164 | 1.052638663  | -0.53959988   | 2.394378474  |
| ENSRLOG00000005670 | tubb1          | tubulin, beta 1 class VI [Source:ZFIN:Acc:ZDB-GENE-1110408-5]                                                    | 18.60065849 | 0            | -1.472452009  | 15.1289801   |
| ENSRLOG00000009569 | -              | -                                                                                                                | 3.725757427 | 2.873040663  | 0.084744482   | 0.887449178  |
| ENSRLOG00000000240 | -              | -                                                                                                                | 7.184858465 | -11.77195159 | -5.398888721  | 13.56145025  |
| ENSRLOG00000000217 | -              | -                                                                                                                | 6.611909876 | -0.163353531 | -3.549366187  | 3.226381005  |
| ENSRLOG00000009888 | hapln1a        | hyaluronan and proteoglycan link protein 1a [Source:ZFIN:Acc:ZDB-GENE-050302-175]                                | 3.830939162 | 2.037300297  | -0.637299902  | 1.156824069  |
| ENSRLOG00000000321 | lgr1r1b        | fibroblast growth factor receptor 1b [Source:ZFIN:Acc:ZDB-GENE-060510-14]                                        | 3.784000326 | 1.173848403  | -1.777117737  | 0.293519203  |
| ENSRLOG00000017377 | fox3           | forkhead box O3 [Source:NCBI gene:Acc:100301615]                                                                 | 5.41838635  | 2.4532552    | -1.437535303  | 1.521537326  |
| ENSRLOG00000004154 | notch2         | notch 2 [Source:ZFIN:Acc:ZDB-GENE-000279-4]                                                                      | 3.032382767 | 0.903883841  | -1.070743496  | 1.060250335  |
| ENSRLOG00000012685 | si.dkey-19218  | si.dkey-19218.9 [Source:ZFIN:Acc:ZDB-GENE-120709-25]                                                             | 4.010891604 | 2.045130566  | -0.809740086  | 1.156506178  |
| ENSRLOG00000016594 | TSPAN9         | terraspanin-9 [Source:NCBI gene:Acc:101168895]                                                                   | 3.58667391  | 1.784053068  | -0.982078216  | 0.841027350  |
| ENSRLOG00000013238 | -              | -                                                                                                                | 5.152248264 | 0.948893451  | -2.27837219   | 1.931037061  |
| ENSRLOG00000014641 | RELN           | reelin [Source:NCBI gene:Acc:100049232]                                                                          | 4.38866463  | 2.5364791    | -1.133414024  | 0.69938353   |
| ENSRLOG00000008292 | pnp5a          | purine nucleoside phosphorylase 5a [Source:ZFIN:Acc:ZDB-GENE-040476-2553]                                        | 4.895100153 | 1.938674351  | -2.230945724  | 0.725965396  |
| ENSRLOG00000017242 | -              | -                                                                                                                | 18.03861404 | 11.27488188  | -2.12931888   | 2.691768219  |
| ENSRLOG00000003389 | itgb3a         | integrin beta 3a [Source:ZFIN:Acc:ZDB-GENE-071207-1]                                                             | 4.418097853 | 0.748466748  | -2.155256556  | 1.545593076  |
| ENSRLOG00000015138 | lrrc32         | leucine rich repeat containing 32 [Source:ZFIN:Acc:ZDB-GENE-090630-11]                                           | 3.270039768 | 1.094496372  | -1.15092006   | 1.02510844   |
| ENSRLOG00000012662 | ker94          | keratin, type I cytoskeletal 13 [Source:NCBI gene:Acc:101160141]                                                 | 4.384269735 | 1.474124632  | -2.698989209  | 0.211640987  |
| ENSRLOG00000005486 | lbox           | bobly sox homolog (Drosophila) [Source:ZFIN:Acc:ZDB-GENE-09104-306]                                              | 4.093161234 | 1.398210198  | 0.07824887    | 2.773669373  |
| ENSRLOG00000015641 | dfc6c          | differentially expressed in FDCP 6c homolog [Source:ZFIN:Acc:ZDB-GENE-060503-87]                                 | 4.91413801  | 0.795638273  | -1.435035376  | 2.689351072  |
| ENSRLOG00000004222 | fstl3          | follicularin-like 3 (secreted glycoprotein) [Source:ZFIN:Acc:ZDB-GENE-050913-111]                                | 3.544933558 | -0.597288362 | -4.403607057  | -0.260900531 |
| ENSRLOG00000003013 | lpar6a         | lysophosphatidic acid receptor 6a [Source:ZFIN:Acc:ZDB-GENE-061013-343]                                          | 4.325091195 | 2.093900111  | -1.561613022  | 0.670063323  |
| ENSRLOG00000003048 | mala           | myelin and lymphocyte protein [Source:NCBI gene:Acc:101170152]                                                   | 17.55624199 | 12.91785874  | -2.782158993  | 1.856691515  |
| ENSRLOG00000007410 | -              | -                                                                                                                | 5.705179669 | 1.90953445   | -2.27852644   | 1.517605129  |
| ENSRLOG00000004980 | adams1         | ADAM metalloproteinase with thrombospondin type 1 motif 1 [Source:ZFIN:Acc:ZDB-GENE-070814-1]                    | 3.758769774 | 1.50230392   | -3.501735911  | -1.244784781 |
| ENSRLOG00000014372 | cdk42ep1b      | CDK42 effector protein (Rho GTPase binding) 1b [Source:ZFIN:Acc:ZDB-GENE-120215-219]                             | 4.712591344 | 1.523823493  | -2.12084477   | 1.068044496  |
| ENSRLOG00000010729 | ches1          | checkpoint suppressor 1 [Source:ZFIN:Acc:ZDB-GENE-040217-11]                                                     | 3.294153131 | 1.231307093  | -0.991229828  | 1.072090404  |
| ENSRLOG00000015357 | smug1          | single-strand-selective monofunctional uracil-DNA glycosylase 1 [Source:ZFIN:Acc:ZDB-GENE-030131-9473]           | 3.473553394 | 1.39096626   | -1.62761347   | 0.455460101  |
| ENSRLOG00000010032 | cpb1           | carboxypeptidase B1 [Source:NCBI gene:Acc:101169819]                                                             | 7.051475306 | 0.995571272  | -6.77844683   | -0.711455828 |
| ENSRLOG00000006540 | si.ch211-1632l | si.ch211-1632l.8 [Source:ZFIN:Acc:ZDB-GENE-041008-93]                                                            | 6.999924577 | 3.96310291   | -0.533663353  | 3.070418329  |
| ENSRLOG00000005820 | -              | -                                                                                                                | 3.695861017 | 2.035138074  | -1.105215126  | 0.555988588  |
| ENSRLOG00000001650 | cytb           | cytochrome b-245, beta polypeptide (chronic granulomatous disease) [Source:ZFIN:Acc:ZDB-GENE-040426-1380]        | 5.425295653 | 2.704668975  | -2.87613327   | -0.155023479 |
| ENSRLOG00000015444 | tpka           | inositol-trisphosphate 3-kinase A [Source:ZFIN:Acc:ZDB-GENE-030616-116]                                          | 5.322046843 | 1.174141102  | -2.341278298  | 1.80711249   |
| ENSRLOG00000013386 | tm6d6          | transmembrane 624 trafficking protein 6 [Source:ZFIN:Acc:ZDB-GENE-131121-182]                                    | 6.210161904 | 3.275843885  | -3.408458423  | -0.473655099 |
| ENSRLOG00000016361 | -              | -                                                                                                                | 4.345203184 | 1.221825402  | -1.262134096  | 1.861728761  |
| ENSRLOG00000008679 | H3hc           | histone H3.3 [Source:NCBI gene:Acc:101163693]                                                                    | 3.42071398  | 1.192791403  | -0.38166411   | 1.852100775  |
| ENSRLOG00000002782 | TCG (1 of mar) | 4981694855 [Source:HGN:Symbol:Acc:HGN:4191]                                                                      | 4.981694855 | 0.175942172  | -2.425039203  | -2.35696981  |
| ENSRLOG00000000958 | -              | -                                                                                                                | 5.238256377 | 2.560401769  | -2.822605885  | -0.144268806 |
| ENSRLOG00000011131 | pmp22b         | peripherin myelin protein 22 [Source:NCBI gene:Acc:101160768]                                                    | 4.261914037 | 1.856317485  | -0.675601869  | 1.730479303  |
| ENSRLOG00000006611 | NACC2          | NACC family member 2 [Source:HGN:Symbol:Acc:HGN:23846]                                                           | 5.894161038 | 1.049393503  | -2.707159758  | 2.138092476  |

|                     |                |                                                                                                            |             |              |              |              |
|---------------------|----------------|------------------------------------------------------------------------------------------------------------|-------------|--------------|--------------|--------------|
| ENSORLG00000010663  | ela3l          | chymotrypsin-like elastase family member 2A [Source:NCBI gene:Acc:101165737]                               | 10.01339013 | 3.57369657   | -17.5845499  | -11.14479206 |
| ENSORLG00000009239  | acsbq2         | acyl-CoA synthetase butyryl-CoA family member 2 [Source:ZFIN,Acc:ZDB-GENE-030131-7099]                     | 3.026229322 | 1.229299857  | -0.863812008 | 0.93360245   |
| ENSORLG00000001258  | rab25a         | RAB25, member RAS oncogene family a [Source:ZFIN,Acc:ZDB-GENE-042127-69]                                   | 5.827123876 | -0.257157534 | -3.140282519 | 2.944483738  |
| ENSORLG000000018034 | col4a2         | collagen, type IV, alpha 2 [Source:ZFIN,Acc:ZDB-GENE-070725-3]                                             | 4.209608519 | 1.619743844  | -0.966533113 | 1.623816686  |
| ENSORLG00000001038  | -              | -                                                                                                          | 3.062431047 | 1.69548537   | -1.611306087 | -0.243020617 |
| ENSORLG00000007725  | lmm3           | lmm3-like 3 [Source:ZFIN,Acc:ZDB-GENE-030131-]                                                             | 4.252969742 | 1.932164095  | -0.118605957 | 2.206850448  |
| ENSORLG000000017893 | -              | -                                                                                                          | 7.298083566 | -11.10417938 | -4.571837603 | 13.83083009  |
| ENSORLG000000015894 | -              | -                                                                                                          | 3.064911319 | 1.958138991  | 0.712148069  | 1.819401271  |
| ENSORLG000000011125 | lapk3a         | LAPK3A, kinase 3a [Source:ZFIN,Acc:ZDB-GENE-100921-50]                                                     | 2.295665371 | 0.158731133  | -7.544402789 | 0.555014994  |
| ENSORLG000000010212 | -              | -                                                                                                          | 3.423672473 | 2.305031117  | 0.377528525  | 1.496853501  |
| ENSORLG000000009360 | cyba           | cytochrome b-245 light chain [Source:NCBI gene:Acc:101105771]                                              | 3.712391787 | 1.564219844  | -0.84677776  | 1.301878831  |
| ENSORLG000000021753 | ND1            | NAADH dehydrogenase subunit 1 [Source:NCBI gene:Acc:8955441]                                               | 3.178893512 | 1.026975445  | -0.098104602 | 2.054298447  |
| ENSORLG000000007292 | metrnl         | mesenchyme like, glial cell differentiation regulator [Source:NCBI gene:Acc:101166875]                     | 3.468941135 | 0.642814205  | -0.303745223 | 2.522866786  |
| ENSORLG000000004130 | mb             | myoD protein [Source:NCBI gene:Acc:101156224]                                                              | 8.98274534  | -0.631610862 | -7.664404818 | 1.950439931  |
| ENSORLG000000006083 | -              | -                                                                                                          | 4.849126811 | -0.138200024 | -2.955103388 | 2.054115289  |
| ENSORLG000000013153 | apodb (1 of m) | apolipoprotein Db [Source:ZFIN,Acc:ZDB-GENE-051023-8]                                                      | 7.236043034 | 3.012957613  | -2.626019964 | 1.597550856  |
| ENSORLG000000013965 | ret            | ret proto-oncogene receptor tyrosine kinase [Source:ZFIN,Acc:ZDB-GENE-980526-307]                          | 3.410363581 | -0.681607479 | -2.745414936 | 1.347041391  |
| ENSORLG000000017142 | itpkb          | inositol-trisphosphate 3-kinase B [Source:ZFIN,Acc:ZDB-GENE-041014-166]                                    | 3.212740056 | 2.108308784  | 0.291038256  | 1.399594604  |
| ENSORLG000000016711 | meox2a         | mesenchyme homeobox 2a [Source:ZFIN,Acc:ZDB-GENE-090613-1]                                                 | 15.80618936 | 13.24318737  | -2.356127575 | 0.207340063  |
| ENSORLG000000017937 | -              | -                                                                                                          | 3.006467222 | 0.533796077  | -2.96207734  | -0.488861316 |
| ENSORLG000000004460 | pdk4           | dynamin-dependent kinase, isozyme 4 [Source:ZFIN,Acc:ZDB-GENE-060503-754]                                  | 4.137719682 | 1.844763143  | -0.866304662 | 1.427137717  |
| ENSORLG000000001463 | eml2           | echinoderm microtubule associated protein like 2 [Source:ZFIN,Acc:ZDB-GENE-050706-71]                      | 3.97892688  | 0.634635337  | -2.391824877 | 0.952951593  |
| ENSORLG000000012199 | MAPKAPK3       | mitogen-activated protein kinase-activated protein kinase 3 [Source:HGNC Symbol,Acc:HGNC:6888]             | 3.069596776 | 1.950563439  | 0.143375725  | 1.262894016  |
| ENSORLG000000002020 | -              | -                                                                                                          | 4.500474772 | 1.708415937  | -3.394808139 | -0.602264303 |
| ENSORLG000000015001 | pmela          | premelanosome protein a [Source:ZFIN,Acc:ZDB-GENE-030131-9818]                                             | 4.71066297  | 0.60465386   | -2.29884088  | 1.807653254  |
| ENSORLG000000004713 | ifitp5a        | insulin-like growth factor binding protein 5a [Source:ZFIN,Acc:ZDB-GENE-070520-8]                          | 6.118255007 | 0.92145979   | -3.864508332 | 1.332816241  |
| ENSORLG000000000449 | ckma           | creatine kinase M-type [Source:NCBI gene:Acc:101166239]                                                    | 6.666240738 | -1.038330727 | -7.53135972  | 0.173694098  |
| ENSORLG000000016062 | plcx1          | phosphatidylinositol-specific phospholipase C, X domain containing 1 [Source:ZFIN,Acc:ZDB-GENE-131127-240] | 3.697896011 | 1.967257757  | -0.968311256 | 0.762752071  |
| ENSORLG000000002435 | SPRED2         | sprouty related EVH1 domain containing 2 [Source:HGNC Symbol,Acc:HGNC:17722]                               | 4.667712073 | 1.911597178  | -1.448947998 | 1.307651594  |
| ENSORLG000000010872 | -              | -                                                                                                          | 3.324968508 | 2.184657427  | 1.58813085   | 2.708925166  |
| ENSORLG000000009429 | nr2f2          | nuclear receptor subfamily 2, group F, member 2 [Source:ZFIN,Acc:ZDB-GENE-990415-257]                      | 3.298882184 | 1.809396953  | -1.619177644 | -0.129207309 |
| ENSORLG000000007187 | si.ch1073-184  | si.ch1073-184z2.1 [Source:ZFIN,Acc:ZDB-GENE-081104-74]                                                     | 9.337707948 | 4.431398478  | -3.998096596 | 0.908680733  |
| ENSORLG000000009131 | SLC16A7        | solute carrier family 16 member 7 [Source:HGNC Symbol,Acc:HGNC:10928]                                      | 4.047961769 | 1.234519571  | -1.196004731 | 1.617928881  |
| ENSORLG000000000490 | -              | -                                                                                                          | 3.589514847 | 1.105290182  | -0.236587787 | 2.248121765  |
| ENSORLG000000010885 | -              | -                                                                                                          | 4.656869767 | 2.598020711  | -1.100758072 | 1.059121581  |
| ENSORLG000000010383 | -              | -                                                                                                          | 3.014039953 | 2.84710195   | -4.055948587 | -3.888528012 |
| ENSORLG000000008455 | cdtjfab        | platelet derived growth factor subunit A [Source:NCBI gene:Acc:101158282]                                  | 5.046079451 | 2.294904722  | -2.06560317  | 0.686055999  |
| ENSORLG000000020952 | Rf00001        | ES ribosome RNA [Source:NCBI gene:Acc:111949014]                                                           | 7.368534603 | 4.775574153  | 0.292040973  | 2.883492478  |
| ENSORLG000000015472 | -              | -                                                                                                          | 4.709484438 | 3.42942191   | -0.978668333 | 0.301878702  |
| ENSORLG000000006152 | rg1l           | immunoresponsive gene 1, like [Source:ZFIN,Acc:ZDB-GENE-081103-301]                                        | 5.237260978 | 0.950342776  | -6.440269667 | -0.356624318 |
| ENSORLG000000014801 | znf292a        | zinc finger protein 292a [Source:ZFIN,Acc:ZDB-GENE-071004-18]                                              | 3.209196447 | 1.94985018   | 1.295136343  | 2.554967379  |
| ENSORLG000000006559 | dup1           | dual specificity phosphatase 1 [Source:ZFIN,Acc:ZDB-GENE-040426-2018]                                      | 3.946381482 | 0.935582038  | -1.225257187 | 1.786027344  |
| ENSORLG000000015372 | -              | -                                                                                                          | 3.889901533 | 2.631943932  | -1.292208077 | -0.233754635 |
| ENSORLG000000017760 | dct            | dicoumarol tautomerase [Source:ZFIN,Acc:ZDB-GENE-000508-1]                                                 | 3.954361226 | 0.634771596  | -0.873530442 | 2.446543272  |
| ENSORLG00000002614  | FBN1           | fibrillin 1 [Source:HGNC Symbol,Acc:HGNC:3603]                                                             | 3.408420467 | 1.662185511  | -1.783292254 | -0.038572096 |
| ENSORLG000000017906 | -              | -                                                                                                          | 3.076900923 | 1.695241981  | -1.125796445 | 0.256347414  |
| ENSORLG000000009085 | aplnrb         | apelin receptor b [Source:ZFIN,Acc:ZDB-GENE-050913-90]                                                     | 4.377136024 | 2.079199646  | -1.451286428 | 0.847135277  |
| ENSORLG000000010894 | -              | -                                                                                                          | 16.00793283 | 12.52868288  | -0.53418178  | 2.348522477  |
| ENSORLG000000016106 | -              | -                                                                                                          | 7.057921336 | 5.430707975  | -1.138401089 | 0.487161015  |
| ENSORLG000000010823 | ctse           | catherin C [Source:ZFIN,Acc:ZDB-GENE-030619-9]                                                             | 3.910709261 | 0.886791441  | -2.157002103 | 0.867400646  |
| ENSORLG000000011195 | zgc:165502     | I2UMO1 receptor, JUNO [Source:HGNC Symbol,Acc:HGNC:20265]                                                  | 5.910715022 | 1.019588224  | -3.699679354 | 1.191932257  |
| ENSORLG000000007224 | -              | -                                                                                                          | 4.867813875 | 1.495021844  | -1.085582982 | 2.287693818  |
| ENSORLG000000005228 | -              | -                                                                                                          | 3.581834027 | 1.728116608  | -1.049773203 | 0.80442899   |
| ENSORLG000000007084 | -              | -                                                                                                          | 3.910982511 | -0.461658356 | -3.08557412  | 1.3118658    |
| ENSORLG000000009507 | -              | -                                                                                                          | 4.314043266 | 1.472829113  | -0.64599494  | 2.195702421  |
| ENSORLG000000006848 | ptgir          | prostaglandin I2 receptor [Source:ZFIN,Acc:ZDB-GENE-120511-1]                                              | 4.261597001 | 1.417528693  | -2.161846682 | 0.682705658  |
| ENSORLG000000016791 | bcl2b          | BCL2L1, apoptosis regulator b [Source:ZFIN,Acc:ZDB-GENE-110411-185]                                        | 4.535877934 | 1.77606758   | -1.362304578 | 1.397991993  |
| ENSORLG000000003383 | chdh           | choline dehydrogenase [Source:ZFIN,Acc:ZDB-GENE-110211-1]                                                  | 3.813556783 | 2.081358022  | 0.233954952  | 1.96638735   |
| ENSORLG000000021622 | Rf00405        | small nucleolar RNA SNORA44 [Source:NCBI gene:Acc:111948272]                                               | 4.163079204 | 2.305803319  | 0.485033777  | 2.342794384  |
| ENSORLG000000002726 | shna1b         | shna-like 1 [Source:NCBI gene:Acc:101156648]                                                               | 4.738888812 | 1.499528647  | -1.542201411 | 1.698621373  |
| ENSORLG000000004915 | TNFRSF11B      | TNF receptor superfamily member 11b [Source:HGNC Symbol,Acc:HGNC:11909]                                    | 6.690315894 | 3.879078844  | -0.915020949 | 1.896712906  |
| ENSORLG000000010754 | si.ch73-174b1  | si.ch73-174b16.4 [Source:ZFIN,Acc:ZDB-GENE-160728-69]                                                      | 3.343574526 | 1.103084913  | -0.335286953 | 1.905688338  |
| ENSORLG000000005509 | ngfrb          | nerve growth factor receptor b [Source:ZFIN,Acc:ZDB-GENE-070606-2]                                         | 3.21935972  | 0.08383287   | -1.52549515  | 1.610638407  |
| ENSORLG000000007478 | nmnat2         | nicotinamide nucleotide adenyltransferase 2 [Source:NCBI gene:Acc:101156529]                               | 16.18988574 | 13.00350913  | -0.554440136 | 2.632405182  |
| ENSORLG000000007556 | her6           | heparin-binding epidermal growth factor-like growth factor 6 [Source:ZFIN,Acc:ZDB-GENE-980526-144]         | 3.494350718 | 1.599639782  | -0.469914775 | 1.425280972  |
| ENSORLG000000002112 | srna23         | serine protease 23 [Source:ZFIN,Acc:ZDB-GENE-030131-9149]                                                  | 4.268868495 | 2.474990232  | -1.340061236 | 0.454302093  |
| ENSORLG000000015886 | 307            | dermatocan [Source:NCBI gene:Acc:101166619]                                                                | 4.645439353 | 1.920194515  | -3.17860512  | -0.482876986 |
| ENSORLG000000016705 | ACVR1C         | activin A receptor type 1C [Source:HGNC Symbol,Acc:HGNC:18123]                                             | 5.401154318 | -2.167387159 | -1.363755552 | 6.205249355  |
| ENSORLG000000009387 | plaua          | plasminogen activator, urokinase 8 [Source:ZFIN,Acc:ZDB-GENE-030313-278]                                   | 4.510260041 | 3.291322605  | -0.709910272 | 0.509881706  |
| ENSORLG000000010627 | -              | -                                                                                                          | 4.944068258 | 1.866728957  | -1.787143962 | 1.290678001  |
| ENSORLG000000013293 | -              | -                                                                                                          | 3.693410426 | 1.6279778    | -0.789898887 | 1.26692847   |
| ENSORLG000000004482 | map3k8         | mitogen-activated protein kinase kinase 8 [Source:ZFIN,Acc:ZDB-GENE-100316-8]                              | 3.208463209 | -0.037921467 | -1.308119165 | 1.938750638  |
| ENSORLG000000000616 | -              | -                                                                                                          | 5.878437766 | 0.38142029   | -3.19015672  | 2.308486278  |

|                     |                |                                                                                                                             |             |              |              |               |
|---------------------|----------------|-----------------------------------------------------------------------------------------------------------------------------|-------------|--------------|--------------|---------------|
| ENSORLG00000009873  | sdkey-26133    | carbohydrate sulfotransferase 12 [Source:NCBI gene:Acc:101166690]                                                           | 3.733738843 | 2.496481419  | -0.437435208 | 0.798307842   |
| ENSORLG00000002620  | ast16          | ankyrin repeat and SOCS box containing 16 [Source:ZFIN:Acc:ZDB-GENE-031031-3]                                               | 3.335149755 | -0.138675325 | -1.088338363 | 2.385970923   |
| ENSORLG00000003028  | -              | -                                                                                                                           | 4.634832873 | 1.187250656  | -2.700016204 | 0.748048918   |
| ENSORLG000000012170 | MAFG (1 of m   | transcription factor MAFG [Source:NCBI gene:Acc:101156633]                                                                  | 16.97535596 | 11.61654425  | -2.444044293 | 2.915235775   |
| ENSORLG000000012100 | itr82          | Int1RIM family, member 82 [Source:ZFIN:Acc:ZDB-GENE-030219-207]                                                             | 3.957705437 | 2.315919416  | -1.68574084  | -0.043470021  |
| ENSORLG000000012708 | lyn            | LYN proto-oncogene, Src family tyrosine kinase [Source:ZFIN:Acc:ZDB-GENE-040912-7]                                          | 4.381223008 | 1.513035605  | -2.354131077 | 0.514539864   |
| ENSORLG000000009318 | -              | -                                                                                                                           | 5.842224073 | 2.172296555  | -1.172958588 | 2.383857347   |
| ENSORLG000000011060 | apc1a          | apiclinic 1a [Source:ZFIN:Acc:ZDB-GENE-051120-147]                                                                          | 4.370003951 | 0.805963536  | -0.861518679 | 2.69004904    |
| ENSORLG000000012055 | hkl1           | H2D-like homeo box 1 (Drosophila) [Source:ZFIN:Acc:ZDB-GENE-030131-5304]                                                    | 4.078315828 | 1.618061769  | -2.182976085 | 0.2776247     |
| ENSORLG00000002904  | ctdnh1 (1 of m | ctdnh1 [Source:ZFIN:Acc:ZDB-GENE-010328-8]                                                                                  | 4.578075101 | -2.311795793 | -4.495786547 | 2.396618749   |
| ENSORLG000000007239 | -              | -                                                                                                                           | 4.854353503 | 1.080830391  | -1.498396706 | 2.275610749   |
| ENSORLG000000003645 | ahh14b         | abhydrolase domain containing 14B [Source:ZFIN:Acc:ZDB-GENE-040426-1343]                                                    | 4.293386312 | 0.756309106  | -1.685885805 | 1.851675986   |
| ENSORLG000000015171 | slc16a10       | solute carrier family 16 (anion/cation exchanger), member 10 [Source:ZFIN:Acc:ZDB-GENE-040426-1524]                         | 4.410040589 | 0.577596738  | -2.30603787  | 1.52689066    |
| ENSORLG000000002007 | efemp2a        | EGF containing fibulin extracellular matrix protein 2a [Source:ZFIN:Acc:ZDB-GENE-041212-3]                                  | 4.296368417 | 2.295350141  | -2.347666362 | -0.346184101  |
| ENSORLG000000012725 | ldr2           | immunoglobulin-like domain containing receptor 2 [Source:ZFIN:Acc:ZDB-GENE-050708-83]                                       | 3.664745061 | 1.761519044  | 0.317957343  | 2.22166855    |
| ENSORLG000000013339 | xyfl1          | xylofuranase 1 [Source:ZFIN:Acc:ZDB-GENE-1111017-2]                                                                         | 4.324952079 | 0.331796636  | -1.343057883 | 2.650623596   |
| ENSORLG000000015871 | hds1           | hematopoietic cell-specific Lyn substrate 1 [Source:ZFIN:Acc:ZDB-GENE-030131-7191]                                          | 3.510863834 | 2.021478622  | 0.573325124  | 2.06319446    |
| ENSORLG000000016085 | hpk2           | homeobox domain interacting protein kinase 2 [Source:ZFIN:Acc:ZDB-GENE-031125-4]                                            | 3.163213322 | 0.949790948  | -3.110075558 | -0.896169037  |
| ENSORLG000000017511 | NTSE (1 of m   | 5'-nucleotidase ecto [Source:HGNC Symbol/Acc:HGNC:8021]                                                                     | 4.674935025 | 2.977083451  | -0.873655179 | 0.82497241    |
| ENSORLG000000009712 | slc5a1         | solute carrier family 5 (sodium/glucose cotransporter), member 1 [Source:ZFIN:Acc:ZDB-GENE-040426-1524]                     | 4.583050974 | 0.727344382  | -3.273244705 | 0.582946995   |
| ENSORLG000000002126 | avor1ab        | arginine vasopressin receptor 1A [Source:ZFIN:Acc:ZDB-GENE-041210-105]                                                      | 3.46931979  | 2.022523152  | 0.005908503  | 1.45318977    |
| ENSORLG000000012908 | -              | -                                                                                                                           | 3.590215623 | 0.859306665  | -0.879756595 | 1.85167594    |
| ENSORLG000000002823 | sema6dl        | sema domain, transmembrane domain (TM), and cytoplasmic domain, (semaphorin) 6D, like [Source:ZFIN:Acc:ZDB-GENE-050417-171] | 5.96179762  | 3.322936141  | -0.393006076 | 2.246344034   |
| ENSORLG000000007290 | -              | -                                                                                                                           | 5.22090146  | 2.127262349  | -1.365261975 | 1.730050848   |
| ENSORLG000000004201 | -              | -                                                                                                                           | 3.32797672  | 1.571421417  | -0.258601925 | 1.498439236   |
| ENSORLG000000006036 | rbck1          | RanBP type and C3H1-type zinc finger containing 1 [Source:ZFIN:Acc:ZDB-GENE-040704-3]                                       | 4.197146584 | 0.34072109   | -1.89450836  | 1.962401815   |
| ENSORLG000000015390 | dgkaa          | diacylglycerol kinase, alpha a [Source:ZFIN:Acc:ZDB-GENE-060516-305]                                                        | 3.461069611 | 0.933222519  | -0.210760979 | 2.317570499   |
| ENSORLG00000002237  | slc17a5        | solute carrier family 17 (acidic sugar transporter), member 5 [Source:ZFIN:Acc:ZDB-GENE-060929-1158]                        | 3.479668883 | -0.10217234  | -1.94867904  | 1.633646834   |
| ENSORLG000000011584 | -              | -                                                                                                                           | 2.005031314 | 2.216285641  | -2.501198277 | -0.7119687377 |
| ENSORLG000000016851 | -              | -                                                                                                                           | 5.852979446 | 1.322502909  | -2.47118626  | 2.061794161   |
| ENSORLG000000021761 | -              | -                                                                                                                           | 4.195025131 | 0.923515803  | -1.039518184 | 2.232476138   |
| ENSORLG000000006029 | ndst3          | N-deacetylase/N-sulfotransferase (heparan glucosaminyl) 3 [Source:ZFIN:Acc:ZDB-GENE-090312-199]                             | 3.65271495  | 0.913276734  | -3.435435922 | -0.695514752  |
| ENSORLG000000015572 | gpr17          | G protein-coupled receptor 17 [Source:ZFIN:Acc:ZDB-GENE-100922-133]                                                         | 16.59203782 | 0            | -2.272401505 | 14.32012783   |
| ENSORLG000000014029 | -              | -                                                                                                                           | 4.321548507 | 2.317590869  | -2.812124073 | -0.807681339  |
| ENSORLG000000005970 | -              | -                                                                                                                           | 5.319592106 | 1.746020315  | -2.828558977 | 0.718610041   |
| ENSORLG000000008925 | -              | -                                                                                                                           | 4.334251228 | 1.792683591  | 0.061187124  | 2.62342037    |
| ENSORLG000000010727 | thbs2a         | thrombospondin 2a [Source:ZFIN:Acc:ZDB-GENE-020708-2]                                                                       | 3.767736679 | 1.635743874  | -0.684761584 | 1.447715851   |
| ENSORLG000000010452 | -              | -                                                                                                                           | 3.992530292 | 0.556669714  | -1.132678727 | 2.30367771    |
| ENSORLG000000017073 | cxcl44         | C-C motif chemokine 17 [Source:NCBI gene:Acc:101161792]                                                                     | 4.138063686 | 1.813780212  | -2.335508455 | -0.010740179  |
| ENSORLG000000013510 | mamd2b         | MAM domain containing 2b [Source:ZFIN:Acc:ZDB-GENE-091117-16]                                                               | 3.166265468 | 0.749188828  | -1.70223465  | 0.697337949   |
| ENSORLG000000004967 | heph1b         | hephaestin-like 1b [Source:ZFIN:Acc:ZDB-GENE-091204-388]                                                                    | 4.673776792 | 2.460052588  | -1.114144796 | 1.10063997    |
| ENSORLG000000002567 | id4            | DNA-binding protein inhibitor ID-4 [Source:NCBI gene:Acc:101162314]                                                         | 5.83376248  | 0.63356815   | -2.901870394 | 2.299020297   |
| ENSORLG000000014514 | esr1           | estrogen receptor 1 [Source:ZFIN:Acc:ZDB-GENE-020806-5]                                                                     | 4.652918792 | 2.641021093  | -1.223747966 | 0.788634749   |
| ENSORLG000000006967 | -              | -                                                                                                                           | 7.644735293 | 2.694762566  | -5.358201522 | -0.405743891  |
| ENSORLG000000016741 | msx1a          | neuronal vesicle trafficking associated 1 [Source:NCBI gene:Acc:101168617]                                                  | 3.489663825 | 0.013582346  | -0.973689611 | 2.502876168   |
| ENSORLG000000015380 | -              | -                                                                                                                           | 6.69709068  | 1.897526888  | -5.15589255  | -0.375845401  |
| ENSORLG000000015799 | -              | -                                                                                                                           | 3.558886062 | 1.15798625   | -0.962057979 | 1.433282553   |
| ENSORLG000000003410 | zpc-91968      | melanoregulin [Source:NCBI gene:Acc:101159745]                                                                              | 5.222695671 | 0.872814244  | -1.452051048 | 2.898317798   |
| ENSORLG000000007003 | pkc2           | polycystic kidney disease 2 [Source:ZFIN:Acc:ZDB-GENE-040827-4]                                                             | 3.250241013 | 1.664765625  | 0.240824503  | 1.82678476    |
| ENSORLG000000013610 | -              | -                                                                                                                           | 15.68064055 | 0            | -15.68063533 | 0             |
| ENSORLG000000009458 | pk3cg          | phosphatidylinositol-4,5-bisphosphate 3-kinase, catalytic subunit gamma [Source:ZFIN:Acc:ZDB-GENE-040426-2532]              | 3.582887285 | 1.804942619  | -0.601072163 | 1.177356868   |
| ENSORLG000000000187 | ocad2          | OCA domain containing 2 [Source:NCBI gene:Acc:101175427]                                                                    | 16.01092666 | 12.33060041  | -0.91287095  | 2.767955512   |
| ENSORLG000000000802 | enpp2          | ectonucleotide pyrophosphatase/phosphodiesterase 2 [Source:ZFIN:Acc:ZDB-GENE-040426-1156]                                   | 4.765256771 | 2.88439528   | -2.260004061 | -0.378651988  |
| ENSORLG000000011266 | stard10        | STAR-related lipid transfer (STAR) domain containing 10 [Source:ZFIN:Acc:ZDB-GENE-040426-1797]                              | 4.051138477 | 2.281159588  | -0.672095029 | 1.098368467   |
| ENSORLG000000015653 | slc21l1-210b   | slc21l1-210b2 3 [Source:ZFIN:Acc:ZDB-GENE-131122-13]                                                                        | 3.418519965 | 1.669339712  | 0.048265307  | 1.797927538   |
| ENSORLG000000012089 | gsmr1          | peptidase domain containing associated with muscle regeneration 1 [Source:ZFIN:Acc:ZDB-GENE-100422-12]                      | 3.492300294 | 2.326462147  | 1.446848529  | 2.613171486   |
| ENSORLG000000014312 | serpin1b       | serpin family H member 1 [Source:NCBI gene:Acc:100529194]                                                                   | 4.060017288 | 2.164640836  | -1.121091808 | 0.774769604   |
| ENSORLG000000013930 | mafbb          | v-maf avian musculoaponeurotic fibrosarcoma oncogene homolog Bb [Source:ZFIN:Acc:ZDB-GENE-010605-4]                         | 4.685064799 | 1.832261703  | -3.009594729 | -0.156308813  |
| ENSORLG000000006650 | capn12         | cataalin 12 [Source:ZFIN:Acc:ZDB-GENE-050419-245]                                                                           | 4.238135563 | -2.860135415 | -2.0894864   | 5.068628732   |
| ENSORLG000000018002 | -              | -                                                                                                                           | 3.884881172 | 1.8714938    | -0.571168856 | 1.442503435   |
| ENSORLG000000011630 | -              | -                                                                                                                           | 7.595785497 | 3.261600213  | -4.032128454 | 0.302538288   |
| ENSORLG000000011416 | -              | -                                                                                                                           | 3.580596175 | 1.13543843   | -0.612054714 | 1.833587518   |
| ENSORLG000000010547 | prf5a          | proline rich 5a (renal) [Source:ZFIN:Acc:ZDB-GENE-130530-791]                                                               | 3.453216671 | 1.305657222  | -1.398798006 | 0.749254205   |
| ENSORLG000000015985 | -              | -                                                                                                                           | 6.302628336 | 0.004749658  | -3.478952543 | 2.819411164   |
| ENSORLG000000012688 | star           | matrix metalloproteinase, astacin regulatory protein (star), mRNA [Source:RefSeq]                                           | 3.65111295  | 1.74442958   | 1.02571961   | 2.932877806   |
| ENSORLG000000013340 | -              | -                                                                                                                           | 15.94710519 | 14.37756709  | -1.571919999 | -0.181914105  |
| ENSORLG000000006594 | mmp25b         | matrix metalloproteinase 25b [Source:ZFIN:Acc:ZDB-GENE-100308-4]                                                            | 5.605990908 | 2.94362532   | -3.061523891 | -0.398665812  |
| ENSORLG000000004996 | hoxa4a         | homeobox protein Hox-A3a [Source:NCBI gene:Acc:100301584]                                                                   | 6.232963216 | 2.113529381  | -2.657587375 | 1.462331794   |
| ENSORLG000000017889 | -              | -                                                                                                                           | 3.634420072 | 0.732681778  | -2.322961604 | 0.579261286   |

|  |                    |                 |                                                                                                                         |              |              |              |              |
|--|--------------------|-----------------|-------------------------------------------------------------------------------------------------------------------------|--------------|--------------|--------------|--------------|
|  | ENSRLO00000016348  | -               | 4.272149821                                                                                                             | -0.032756486 | -4.245845961 | 0.059545648  |              |
|  | ENSRLO0000001288   | cdh5            | cadherin 5 [Source:ZFIN;Acc:ZDB:GENE-040816-1]                                                                          | 3.937919564  | 2.80260136   | -1.41263117  | -0.27688774  |
|  | ENSRLO0000000162   | stat1a          | signal transducer and activator of transcription 1a [Source:ZFIN;Acc:ZDB:GENE-980526-499]                               | 4.375486458  | 0.955853989  | -1.74325155  | 1.676882212  |
|  | ENSRLO00000010229  | knj13           | potassium inwardly-rectifying channel, subfamily 1, member 13 [Source:ZFIN;Acc:ZDB:GENE-070129-1]                       | 4.987826839  | 2.153151861  | -4.13280782  | -1.297648452 |
|  | ENSRLO00000013303  | hmx1b           | UM homeobox transcription factor 1, beta b [Source:ZFIN;Acc:ZDB:GENE-050114-2]                                          | 3.24630888   | 0.688270801  | -1.409298007 | 1.149225879  |
|  | ENSRLO00000009686  | zbtb46          | zinc finger and BTB domain containing 46 [Source:ZFIN;Acc:ZDB:GENE-080119-392]                                          | 3.921413101  | 2.097903925  | -1.446566557 | 0.378326924  |
|  | ENSRLO000000014587 | sox10           | Oryzias latipes SRY-box 10 (sox10), mRNA [Source:RefSeq; mRNA:Acc:NM_001164871]                                         | 5.53094732   | 1.324125735  | -2.886690451 | 1.320644729  |
|  | ENSRLO00000004414  | lbt             | liver beta [Source:ZFIN;Acc:ZDB:GENE-110909-4]                                                                          | 4.612817988  | -0.309015806 | -1.434279479 | 3.4880877    |
|  | ENSRLO0000000178   | adamts5         | ADAMTS-like 5 [Source:ZFIN;Acc:ZDB:GENE-161017-]                                                                        | 4.031660435  | 2.063063589  | -0.81738664  | 1.151752917  |
|  | ENSRLO00000016518  | agor2           | agouti 2 [Source:ZFIN;Acc:ZDB:GENE-131121-340]                                                                          | 4.317361427  | 1.326801196  | -2.798075759 | 0.139918709  |
|  | ENSRLO00000006479  | agor2           | agouti 2 [Source:ZFIN;Acc:ZDB:GENE-131121-340]                                                                          | 4.784023072  | 0.92344597   | -2.41017463  | 1.461345844  |
|  | ENSRLO00000001116  | -               | 4.773421103                                                                                                             | 2.625958364  | -1.818245002 | 0.330028986  | -            |
|  | ENSRLO00000015847  | -               | 4.056935897                                                                                                             | 1.615679299  | 0.170110295  | 2.61185391   | -            |
|  | ENSRLO00000007525  | trpm1b          | transient receptor potential cation channel, subfamily M, member 1b [Source:ZFIN;Acc:ZDB:GENE-070424-31]                | 5.107277724  | 1.450526603  | -2.398078217 | 1.259160439  |
|  | ENSRLO00000006662  | psmt9-like      | proteasome subunit, beta type 9-like [Source:NCBI gene:Acc:U9529167]                                                    | 5.2034496    | 1.920513164  | -1.593998535 | 1.689423011  |
|  | ENSRLO00000006922  | -               | 4.89868-1 [Source:NCBI gene:Acc:U01156080]                                                                              | 7.184653061  | 1.456907167  | -4.997437283 | 0.730796874  |
|  | ENSRLO00000003408  | galnt12         | UDP-N-acetyl-alpha-D-galactosamine:polypeptide N-acetylglucosaminyltransferase 12 [Source:ZFIN;Acc:ZDB:GENE-080503-704] | 4.077317977  | 0.540939186  | -0.981926364 | 2.554937291  |
|  | ENSRLO00000001039  | arndc3b         | arrestin domain-containing protein 3 [Source:NCBI gene:Acc:U011669661]                                                  | 4.393117881  | 2.387214237  | -1.626589646 | 0.379798667  |
|  | ENSRLO00000017811  | cyp8b2          | cytochrome P450, family 8, subfamily B, polypeptide 2 [Source:ZFIN;Acc:ZDB:GENE-080212-9]                               | 3.459498144  | 1.219311821  | -1.776494296 | 0.464177052  |
|  | ENSRLO00000012255  | -               | 3.305158776                                                                                                             | 0.612591642  | -2.029217513 | 0.663834347  | -            |
|  | ENSRLO00000014522  | eva1ba          | eva-1 homolog Ba (C. elegans) [Source:ZFIN;Acc:ZDB:GENE-030131-8941]                                                    | 3.965656904  | 1.853125375  | -2.015031556 | 0.097985186  |
|  | ENSRLO00000014202  | ctsd4b          | Ctp/p300-interacting transactivator, with Glu/Asp-rich carboxy-terminal domain, 4b [Source:ZFIN;Acc:ZDB:GENE-030426-3]  | 4.322082724  | 1.581520156  | -2.113037294 | 0.628010113  |
|  | ENSRLO00000003680  | tspan34         | tetraspanin 34 [Source:ZFIN;Acc:ZDB:GENE-060825-202]                                                                    | 4.721400214  | 0.168203399  | -1.718753196 | 2.834928475  |
|  | ENSRLO00000004030  | ak3 (1 of many) | FLK3 ETS-domain protein [Source:ZFIN;Acc:ZDB:GENE-030716-2]                                                             | 5.887067827  | 3.376758068  | -0.940879158 | 1.569917772  |
|  | ENSRLO000000015115 | hmx2a           | homeobox 2a [Source:ZFIN;Acc:ZDB:GENE-040914-13]                                                                        | 5.77293694   | 3.221855778  | -0.513066973 | 2.038498117  |
|  | ENSRLO00000015670  | tryp1           | trypsinogen 1 [Source:ZFIN;Acc:ZDB:GENE-030131-6654]                                                                    | 4.949071186  | 1.970815615  | -2.456517809 | 0.522228568  |
|  | ENSRLO00000014964  | -               | 4.993967576                                                                                                             | 1.717572777  | -1.373618746 | 0.908258331  | -            |
|  | ENSRLO00000013851  | knj16           | potassium inwardly-rectifying channel, subfamily J, member 16 [Source:ZFIN;Acc:ZDB:GENE-130603-81]                      | 5.980046509  | -11.66614854 | -7.003876201 | 10.64283693  |
|  | ENSRLO00000000415  | dic             | dehac [Source:ZFIN;Acc:ZDB:GENE-030125-4]                                                                               | 3.747975561  | 1.819137347  | -1.407067197 | 0.522257821  |
|  | ENSRLO00000005777  | hmod1b          | hemodin 1b (smooth muscle) [Source:ZFIN;Acc:ZDB:GENE-141215-22]                                                         | 4.09194579   | 1.835068074  | -1.38954058  | 0.86781719   |
|  | ENSRLO00000003744  | mfl165b         | ring finger protein 165b [Source:ZFIN;Acc:ZDB:GENE-061104-369]                                                          | 4.069582527  | 1.143635094  | -0.262474113 | 2.663985202  |
|  | ENSRLO00000009474  | -               | 3.138358335                                                                                                             | 0.58406285   | -0.581334668 | 1.970923159  | -            |
|  | ENSRLO00000012555  | serpinb1        | leukocyte elastase inhibitor [Source:NCBI gene:Acc:U01160389]                                                           | 3.821031801  | 0.506456529  | -0.727580748 | 2.587470387  |
|  | ENSRLO00000010596  | apok4b          | dedicator of cytokinesis 4b [Source:ZFIN;Acc:ZDB:GENE-060130-74]                                                        | 4.042291827  | 1.51283549   | -0.730764311 | 1.798727617  |
|  | ENSRLO00000000610  | -               | 3.065366788                                                                                                             | 0.931734061  | -0.92732074  | 1.206796108  | -            |
|  | ENSRLO00000014171  | kctd15a         | potassium channel tetramerization domain containing 15 [Source:NCBI gene:Acc:U01166482]                                 | 5.058803719  | 1.844562711  | -0.469729229 | 3.191981443  |
|  | ENSRLO00000014446  | -               | 3.944286224                                                                                                             | 1.764099457  | -2.189252927 | -0.008581178 | -            |
|  | ENSRLO00000016135  | at23b           | RAB25, member RAS oncogene family [Source:NCBI gene:Acc:U01171278]                                                      | 4.468364823  | 1.164819041  | -3.2570795   | 0.404951516  |
|  | ENSRLO00000013607  | -               | 3.654769572                                                                                                             | 1.061151044  | -0.497065787 | 2.097031566  | -            |
|  | ENSRLO00000010308  | -               | 4.292105752                                                                                                             | 0.934896928  | -1.647651852 | 1.710331988  | -            |
|  | ENSRLO00000001878  | czalp1b         | cellular retinoic acid-binding protein 1 [Source:NCBI gene:Acc:U01172157]                                               | 5.360505038  | 1.004269545  | -2.392261362 | 1.964458051  |
|  | ENSRLO00000016794  | cpalm8          | C3 and F2P-like, alpha-2-macroglobulin domain containing 8 [Source:ZFIN;Acc:ZDB:GENE-050208-428]                        | 3.977207534  | 1.393238998  | -0.742845582 | 1.841607733  |
|  | ENSRLO00000005781  | lrm49al         | family with sequence similarity 49, member A-like [Source:ZFIN;Acc:ZDB:GENE-040801-125]                                 | 4.14009092   | 2.81744298   | -2.424816339 | -1.101796213 |
|  | ENSRLO00000015121  | acx12           | Oryzias latipes C-acyl-mono-ethoxycarbonyl-acyl-coenzyme A oxidase 12 (acx12), mRNA [Source:RefSeq]                     | 3.327384524  | 1.714771733  | -1.790518587 | -0.177420883 |
|  | ENSRLO00000009865  | ago4            | argonaute RISC catalytic component 4 [Source:ZFIN;Acc:ZDB:GENE-030131-5357]                                             | 3.312305616  | 0.764120279  | -1.664315444 | 0.88435406   |
|  | ENSRLO00000001368  | gata2b          | GATA binding protein 2b [Source:ZFIN;Acc:ZDB:GENE-040718-440]                                                           | 8.426372589  | 1.759080901  | -2.69513264  | 3.972653808  |
|  | ENSRLO00000014800  | ghrb            | growth hormone receptor b [Source:ZFIN;Acc:ZDB:GENE-071119-4]                                                           | 4.582954356  | 0.514172268  | -2.993170459 | 1.07609615   |
|  | ENSRLO00000006555  | aplp1           | amyloid beta (A4) precursor-like protein 1 [Source:ZFIN;Acc:ZDB:GENE-040319-11]                                         | 3.639594293  | 2.400232635  | -0.772233234 | 0.467612491  |
|  | ENSRLO00000009205  | apoea           | apolipoprotein Ea [Source:ZFIN;Acc:ZDB:GENE-010724-18]                                                                  | 16.627914    | 12.00442063  | -2.734835862 | 1.889124619  |
|  | ENSRLO000000014317 | ubs2q1          | ubiquitin conjugating enzyme E2 Q family like 1 [Source:NCBI gene:Acc:U01158214]                                        | 4.680397739  | 1.807988067  | -0.271536815 | 2.601358546  |
|  | ENSRLO00000004135  | RBPMS           | RNA binding protein, mRNA processing factor [Source:NCBI gene:Acc:U01164593]                                            | 3.887776423  | 1.476463788  | -2.293247295 | 0.118550365  |
|  | ENSRLO00000007433  | zmp-0000011     | zmp-000001188 [Source:ZFIN;Acc:ZDB:GENE-140106-128]                                                                     | 4.147242671  | 1.809499809  | -2.562919873 | -0.224691712 |
|  | ENSRLO00000002912  | clnc            | claudin 4 [Source:NCBI gene:Acc:U01160997]                                                                              | 6.036413904  | 0.641193114  | -2.647099004 | 2.73995677   |
|  | ENSRLO0000001481   | clnc            | claudin 4 [Source:NCBI gene:Acc:U01158343]                                                                              | 5.784887511  | 0.88151458   | -4.712515445 | 0.912935341  |
|  | ENSRLO00000009368  | lowe            | lysyl oxidase a [Source:ZFIN;Acc:ZDB:GENE-040426-2398]                                                                  | 4.488250222  | 0.508690729  | -2.034722629 | 1.945321843  |
|  | ENSRLO00000013079  | -               | 4.272117465                                                                                                             | 2.361058912  | -1.268934773 | 0.642608738  | -            |
|  | ENSRLO0000001068   | -               | 5.306676006                                                                                                             | 2.784734916  | -1.14602066  | 1.376395687  | -            |
|  | ENSRLO00000006633  | vax             | homeobox protein vent1 [Source:NCBI gene:Acc:U01174125]                                                                 | 4.317092984  | 0.74959308   | -0.771849242 | 2.845769006  |
|  | ENSRLO00000012072  | smn1            | smn1 [Source:ZFIN;Acc:ZDB:GENE-050523-3]                                                                                | 3.155979892  | 1.70620189   | -1.457070138 | -0.006806342 |
|  | ENSRLO00000012951  | -               | 5.462529903                                                                                                             | 0.822029382  | -4.151602464 | 0.489375388  | -            |
|  | ENSRLO00000001165  | hfl5            | Kruppel-like factor 15 [Source:ZFIN;Acc:ZDB:GENE-030131-7844]                                                           | 5.022967305  | 3.881574977  | -1.887515369 | -0.745637347 |
|  | ENSRLO00000003201  | -               | 3.489856318                                                                                                             | 1.524510192  | -1.921907222 | 0.043929     | -            |
|  | ENSRLO00000011639  | col6a1          | collagen, type VI, alpha 1 [Source:ZFIN;Acc:ZDB:GENE-070501-61]                                                         | 3.737702747  | 2.102328195  | -2.152694728 | -0.516835051 |
|  | ENSRLO00000002355  | plaf            | plasminogen activator, tissue type [Source:NCBI gene:Acc:U0009486]                                                      | 4.652742538  | 2.33532595   | -1.556067459 | 0.761808438  |
|  | ENSRLO00000016266  | gdi1            | GDP dissociation inhibitor 1 [Source:ZFIN;Acc:ZDB:GENE-050522-504]                                                      | 3.202840259  | 1.457179079  | 0.14913246   | 1.895277725  |
|  | ENSRLO00000004419  | CYP27C1         | cytochrome P450 family 27 subfamily C, member 1 [Source:HGNC Symbol;Acc:HGNC:33480]                                     | 3.69882105   | 2.513055228  | -0.879538916 | 0.306719891  |
|  | ENSRLO00000001861  | pard6b          | par-6 family cell polarity regulator beta [Source:NCBI gene:Acc:U01159990]                                              | 4.281667959  | 2.178058826  | -1.168935889 | 0.935158007  |
|  | ENSRLO00000015884  | clc25a18        | scute carrier family 25 (glutamate carrier), member 18 [Source:ZFIN;Acc:ZDB:GENE-041111-192]                            | 3.859395997  | 1.303162783  | -1.716086731 | 0.840598764  |
|  | ENSRLO00000014421  | cyp1a           | Oryzias latipes cytochrome P450 1A (cyp1a), mRNA [Source:RefSeq; mRNA:Acc:NM_001105087]                                 | 8.89113566   | 1.63385512   | -4.616752643 | -2.41100987  |

|                     |                |                                                                                                                             |             |              |              |              |
|---------------------|----------------|-----------------------------------------------------------------------------------------------------------------------------|-------------|--------------|--------------|--------------|
| ENSORL0000000586    | -              | -                                                                                                                           | 4.309168752 | -2.277067932 | -4.40746576  | 2.179260585  |
| ENSORL000000016155  | adam28         | ADAM metalloproteinase domain 28 [Source:ZFIN;Acc:ZDB-GENE-060929-532]                                                      | 4.326649357 | 0.412013754  | -1.904752343 | 2.010369402  |
| ENSORL00000002089   | cow6a2         | cytochrome c oxidase subunit Via polypeptide 2 [Source:ZFIN;Acc:ZDB-GENE-040912-129]                                        | 6.909030232 | 1.335213996  | -2.938474973 | 2.63582624   |
| ENSORL000000013898  | SLC6A18        | solute carrier family 6 member 18 [Source:HGNC Symbol;Acc:HGNC:26441]                                                       | 4.637168667 | -1.029798099 | -3.203851772 | 2.463599986  |
| ENSORL00000001423   | foxa3          | forkhead box A3 [Source:ZFIN;Acc:ZDB-GENE-980526-423]                                                                       | 6.403827935 | 0.270875174  | -3.244336603 | 2.889100965  |
| ENSORL000000005991  | TNNI2 (1 of m  | troponin 12, fast skeletal type [Source:HGNC Symbol;Acc:HGNC:11946]                                                         | 4.129144418 | -1.817249628 | -5.77026182  | 0.176617996  |
| ENSORL00000004530   | ezr66          | ezrin domain-4 [Source:NCBI gene;Acc:101174176]                                                                             | 3.751365226 | 0.382081953  | -1.662058964 | 1.707708347  |
| ENSORL000000016196  | zfp174917      | zfp174917 [Source:ZFIN;Acc:ZDB-GENE-070929-421]                                                                             | 4.017435297 | 0.985142062  | -1.951425707 | 1.080752979  |
| ENSORL00000004948   | -              | -                                                                                                                           | 4.87513674  | 1.775597372  | -0.805088959 | 2.29494741   |
| ENSORL000000010789  | RAB38 (1 of m  | RAB38, member RAS oncogene family [Source:HGNC Symbol;Acc:HGNC:93776]                                                       | 4.002897588 | 2.395538936  | -0.194372886 | 1.41347076   |
| ENSORL000000004510  | -              | -                                                                                                                           | 4.399618036 | 2.294034776  | -2.838591641 | -0.732523417 |
| ENSORL000000009691  | -              | -                                                                                                                           | 3.906404772 | 1.841301891  | 0.876321123  | 2.941910226  |
| ENSORL000000016702  | -              | -                                                                                                                           | 3.821687481 | 2.113904882  | -1.4911449   | 0.217423638  |
| ENSORL000000015308  | tdc1           | decorin [Source:ZFIN;Acc:ZDB-GENE-010102-1]                                                                                 | 3.485832723 | 2.154722688  | -2.218205918 | -0.886610732 |
| ENSORL000000012111  | ipar1          | lysophosphatidic acid receptor 1 [Source:ZFIN;Acc:ZDB-GENE-030616-499]                                                      | 3.889302836 | 3.062559088  | 0.621639482  | 1.448867965  |
| ENSORL000000009682  | -              | -                                                                                                                           | 3.73069374  | 0.337465335  | -2.315918817 | 1.077715001  |
| ENSORL0000000014763 | fam234b        | family with sequence similarity 234, member B [Source:ZFIN;Acc:ZDB-GENE-030131-2308]                                        | 3.057536058 | -0.42584915  | -1.604128503 | 1.879741185  |
| ENSORL000000002921  | nuak1b         | NUAK family, SHP1-like kinases, 1b [Source:ZFIN;Acc:ZDB-GENE-131120-18]                                                     | 3.652899862 | 1.953206087  | -1.600884323 | 0.09968414   |
| ENSORL000000005029  | -              | -                                                                                                                           | 3.45092005  | -0.255570422 | -3.600648605 | 0.106327249  |
| ENSORL000000008729  | cavin2a        | caveolin associated protein 2a [Source:ZFIN;Acc:ZDB-GENE-090313-215]                                                        | 4.560456192 | 1.466932817  | -1.812231445 | 1.281776691  |
| ENSORL000000010906  | p2ry6          | P2Y receptor family member 8 [Source:ZFIN;Acc:ZDB-GENE-070912-447]                                                          | 3.113647166 | 2.739715324  | -0.87893418  | -0.504517897 |
| ENSORL000000008593  | -              | -                                                                                                                           | 5.442428514 | 2.578081239  | -0.072324824 | 2.792506618  |
| ENSORL000000005037  | hoxa11a        | homeobox A11a [Source:ZFIN;Acc:ZDB-GENE-000823-8]                                                                           | 4.286082436 | 0.565869286  | -2.014815335 | 1.705883945  |
| ENSORL000000013091  | khk            | ketohexokinase [Source:ZFIN;Acc:ZDB-GENE-040718-381]                                                                        | 3.938689122 | 0.790841176  | -2.176357017 | 0.971976036  |
| ENSORL000000014348  | cavin1b        | caveolin associated protein 1b [Source:ZFIN;Acc:ZDB-GENE-030131-3509]                                                       | 3.807123514 | 2.301332484  | -2.061674781 | -0.55539886  |
| ENSORL000000006233  | si.ch211-5941  | -                                                                                                                           | 4.137092181 | 1.309548884  | -1.087909628 | 1.740072595  |
| ENSORL000000011214  | -              | -                                                                                                                           | 5.319771716 | 1.096037176  | -2.743801926 | 1.480417643  |
| ENSORL000000001073  | crocc2         | ciliary rootlet coiled-coil, rootletin family member 2 [Source:ZFIN;Acc:ZDB-GENE-131121-625]                                | 4.268812318 | 2.079376421  | -0.409913497 | 1.780006586  |
| ENSORL000000004725  | cep170aa       | centrosomal protein 170Aa [Source:ZFIN;Acc:ZDB-GENE-090312-109]                                                             | 4.332121715 | 1.961293035  | 0.042636389  | 2.413955175  |
| ENSORL000000013417  | barx2          | BARX homeobox 2 [Source:NCBI gene;Acc:101170038]                                                                            | 4.197363354 | 0.209473582  | -2.874967339 | 1.113407152  |
| ENSORL000000012953  | hey1           | hes-related family D/HLH transcription factor with YRPW motif 1 [Source:ZFIN;Acc:ZDB-GENE-000607-70]                        | 3.674829417 | 0.899755352  | -1.459956348 | 1.315602918  |
| ENSORL000000003950  | acs2l          | acyl-Coenzyme A synthetase, cytosolic [Source:NCBI gene;Acc:101172107]                                                      | 4.354873312 | 2.179497385  | -1.749239792 | 0.4266223    |
| ENSORL000000000492  | lhx1           | ligand of numb-protein X 1 [Source:ZFIN;Acc:ZDB-GENE-030131-3439]                                                           | 4.722549965 | 1.539012818  | -2.709756929 | 0.474266182  |
| ENSORL000000018012  | esr2b          | estrogen receptor 2b [Source:ZFIN;Acc:ZDB-GENE-030116-1]                                                                    | 4.098141509 | 1.040629626  | -1.580189243 | 1.477807952  |
| ENSORL000000002405  | dmgdh          | dimethylglycine dehydrogenase [Source:ZFIN;Acc:ZDB-GENE-080227-8]                                                           | 5.881233165 | 1.630571592  | -2.289529025 | 1.961617417  |
| ENSORL000000015247  | cdk19          | cyclin-dependent kinase 19 [Source:ZFIN;Acc:ZDB-GENE-040724-19]                                                             | 3.233721331 | 1.397791558  | -0.00284796  | 1.828130688  |
| ENSORL000000006617  | si.ch211-1139c | si.ch211-1139c                                                                                                              | 5.136177903 | 0.633249591  | -0.861719003 | 3.641691165  |
| ENSORL000000002925  | -              | -                                                                                                                           | 4.826570728 | 2.878998167  | -0.763700710 | 1.221455889  |
| ENSORL000000010397  | -              | -                                                                                                                           | 3.841118664 | 1.958010183  | -2.058122284 | 2.198200113  |
| ENSORL000000015009  | eef2b          | eukaryotic translation elongation factor 2 [Source:NCBI gene;Acc:101162480]                                                 | 4.492864998 | 1.625884119  | -0.725144813 | 1.242322136  |
| ENSORL000000017943  | foliastatin 1  | foliastatin like 1 [Source:NCBI gene;Acc:101174309]                                                                         | 3.715301335 | 2.652884379  | -1.475159707 | -0.412257829 |
| ENSORL000000006061  | BLNK           | B cell linker [Source:HGNC Symbol;Acc:HGNC:14711]                                                                           | 4.600491027 | 2.736465198  | -1.699338585 | 0.165091605  |
| ENSORL000000004528  | -              | -                                                                                                                           | 3.603842823 | 2.142328336  | -0.439065759 | 1.02940308   |
| ENSORL000000016565  | qrfb3          | transforming growth factor, beta 3 [Source:ZFIN;Acc:ZDB-GENE-030723-4]                                                      | 4.094384778 | 1.668106848  | -1.030927407 | 1.3958355    |
| ENSORL000000007122  | CNTNAP2        | contactin associated protein like 2 [Source:HGNC Symbol;Acc:HGNC:13830]                                                     | 3.25041849  | -14.21672616 | -4.015360896 | 13.45228629  |
| ENSORL000000009579  | -              | -                                                                                                                           | 3.996897485 | 1.539754827  | -0.68664605  | 1.771581188  |
| ENSORL0000000003181 | noxo1b         | NADPH oxidase organizer 1b [Source:ZFIN;Acc:ZDB-GENE-101203-1]                                                              | 3.824105494 | -0.20909344  | -2.32366483  | 1.709818077  |
| ENSORL0000000015062 | -              | -                                                                                                                           | 3.363912845 | 2.230002853  | -1.255957551 | -0.121562808 |
| ENSORL0000000005251 | grem2a         | gremlin 2, DAN family BMP antagonist a [Source:ZFIN;Acc:ZDB-GENE-131127-498]                                                | 4.41417143  | -1.305756364 | -0.374899691 | 5.346925191  |
| ENSORL000000006031  | gna3           | guanine nucleotide binding protein (G protein), alpha inhibiting activity polypeptide 3 [Source:ZFIN;Acc:ZDB-GENE-070713-6] | 6.286126642 | 4.75032571   | 0.78405466   | 2.320794484  |
| ENSORL000000002212  | -              | -                                                                                                                           | 4.158062896 | 0.473876365  | -1.540947071 | 2.144773818  |
| ENSORL000000014037  | si.ch73-334d1  | si.ch73-334d1                                                                                                               | 5.349465216 | 2.551166449  | -2.908106305 | -0.109322375 |
| ENSORL000000012678  | GPR137B (1 of  | G protein-coupled receptor 137B [Source:HGNC Symbol;Acc:HGNC:11862]                                                         | 3.666496197 | 1.385183589  | -2.254392742 | 0.027405024  |
| ENSORL000000010799  | -              | -                                                                                                                           | 3.151397055 | 0.11578039   | -0.100152239 | 2.93951601   |
| ENSORL000000015549  | bin2a          | bridging integrator 2a [Source:ZFIN;Acc:ZDB-GENE-041114-126]                                                                | 5.461214458 | 1.105150771  | -1.83971307  | 2.51677873   |
| ENSORL000000011131  | rfl1b          | interferon regulatory factor 1 [Source:NCBI gene;Acc:101163420]                                                             | 4.282340898 | 1.920439338  | -0.607485749 | 1.754900642  |
| ENSORL000000010105  | ms2a           | mesin 2a [Source:ZFIN;Acc:ZDB-GENE-090312-163]                                                                              | 4.037578248 | 1.982364128  | -2.128712488 | 0.527000533  |
| ENSORL000000010191  | ckmb           | creatine kinase M-type [Source:NCBI gene;Acc:101163677]                                                                     | 6.371220288 | 0.425411097  | -0.656421662 | -0.110129021 |
| ENSORL000000012193  | h2p21          | H. h2p21 [Source:ZFIN;Acc:ZDB-GENE-080104-3]                                                                                | 5.458998187 | 2.156818738  | -2.472581878 | 0.830138169  |
| ENSORL000000010150  | galact3b       | galactin-5 [Source:NCBI gene;Acc:101159056]                                                                                 | 5.20745305  | 1.278895204  | -1.396315212 | 2.53277681   |
| ENSORL000000015554  | si.ch73-194h1  | si.ch73-194h1                                                                                                               | 4.482537946 | -0.70249007  | -2.726760978 | 2.458752238  |
| ENSORL000000017515  | run3           | run1-related transcription factor 3 [Source:ZFIN;Acc:ZDB-GENE-000605-2]                                                     | 5.618973655 | 1.525673375  | -3.35534071  | 0.738443549  |
| ENSORL000000003147  | -              | -                                                                                                                           | 3.559512614 | 0.541956992  | -0.077095519 | 2.940844593  |
| ENSORL000000014612  | hst11b         | extended synaptotagmin-like protein 1b [Source:ZFIN;Acc:ZDB-GENE-040724-209]                                                | 3.912731528 | 1.894463529  | 0.456184915  | 2.474938166  |
| ENSORL00000002994   | mc2            | midline 2 [Source:ZFIN;Acc:ZDB-GENE-090220-1]                                                                               | 4.509248402 | 1.22432178   | -0.503557608 | 2.781851683  |
| ENSORL000000013440  | prnc1b         | paired related homeobox 1 [Source:NCBI gene;Acc:101166213]                                                                  | 4.504800212 | -0.5522155   | -2.751966377 | 2.305344644  |
| ENSORL000000013521  | -              | -                                                                                                                           | 5.243751593 | 1.573653914  | -0.911488581 | 2.75087098   |
| ENSORL000000013408  | psme2          | proteasome activator subunit 2 [Source:NCBI gene;Acc:101173098]                                                             | 3.197932359 | 0.955875352  | -0.201855335 | 2.040686529  |
| ENSORL00000001892   | lsta           | foliastatin a [Source:ZFIN;Acc:ZDB-GENE-990714-11]                                                                          | 4.934460661 | 2.076347304  | -1.860083159 | 0.998516506  |
| ENSORL000000007450  | ark            | Cytoskeleton-associated related homeobox (ark), mRNA [Source:RefSeq; mRNA; Acc:NM_001122913]                                | 3.134725199 | 1.993420166  | -1.916728399 | -0.77498186  |
| ENSORL000000013739  | -              | -                                                                                                                           | 3.256801155 | 0.238627563  | -2.221222574 | 0.797536156  |
| ENSORL000000013822  | si.ch211-225h  | si.ch211-225h                                                                                                               | 2.58319154  | 1.684133074  | 0.02018535   | 1.594836222  |
| ENSORL000000004146  | -              | -                                                                                                                           | 6.011650957 | -0.451538831 | -5.697302602 | 0.766370293  |

|                     |                 |                                                                                                              |             |              |              |              |
|---------------------|-----------------|--------------------------------------------------------------------------------------------------------------|-------------|--------------|--------------|--------------|
| ENSORLG0000000257   | slc4a1a         | solute carrier family 4 (anion exchanger), member 1a (Diego blood group) [Source:ZFIN;Acc:ZDB-GENE-010525-1] | 5.024556219 | -1.610585595 | -4.617222042 | 2.018405838  |
| ENSORLG00000013949  | PTPNC1          | phosphatidylinositol transfer protein cytoplasmic 1 [Source:HGNC Symbol;Acc:HGNC:21045]                      | 5.173751762 | 2.790767172  | -1.21001089  | 1.173457088  |
| ENSORLG00000008095  | aps8b1b         | aps8b1b [Source:ZFIN;Acc:ZDB-GENE-050506-143]                                                                | 3.358438302 | -1.111292019 | -1.870767043 | 2.58744543   |
| ENSORLG00000003115  | phospho1a       | phosphatase, orphan 1 [Source:ZFIN;Acc:ZDB-GENE-040801-198]                                                  | 6.953604677 | 2.685135902  | -5.001234682 | -0.732281836 |
| ENSORLG00000011891  | -               | -                                                                                                            | 3.140516747 | 1.404616474  | -0.740645178 | 1.495739888  |
| ENSORLG00000000252  | -               | -                                                                                                            | 5.247543991 | 1.645855151  | -2.277302165 | 3.74871654   |
| ENSORLG00000000400  | -               | -                                                                                                            | 4.245777377 | -0.82116468  | -4.599658687 | 0.467767901  |
| ENSORLG000000002977 | mk2a            | MK2/myocardin-like 2a [Source:ZFIN;Acc:ZDB-GENE-135331-36]                                                   | 3.421997524 | 0.579613337  | -1.365118753 | 1.477750475  |
| ENSORLG000000005031 | sl00a10b        | protein sl00a10 [Source:NCBI gene;Acc:101155699]                                                             | 5.901841074 | 1.73534751   | -2.525914254 | 1.641064156  |
| ENSORLG00000010277  | crabp2a         | cellular retinoic acid binding protein 2, a [Source:ZFIN;Acc:ZDB-GENE-030320-4]                              | 3.295020498 | 2.053887887  | -1.317520881 | -0.075903096 |
| ENSORLG00000012969  | nt5c2b          | 5'-nucleotidase, cytosolic 1b [Source:ZFIN;Acc:ZDB-GENE-061013-5221]                                         | 4.477122359 | 1.499895086  | -0.857568079 | 2.120144098  |
| ENSORLG00000017666  | araa2           | amphiregulin [Source:ZFIN;Acc:ZDB-GENE-141216-239]                                                           | 5.583421324 | 1.431049874  | -3.97470688  | 0.188148878  |
| ENSORLG00000013861  | snai1a          | snail family zinc finger 1a [Source:ZFIN;Acc:ZDB-GENE-990415-255]                                            | 5.193969887 | 3.040282133  | -2.467530986 | -0.31335818  |
| ENSORLG00000013801  | gprc5c          | G protein-coupled receptor, class C, group 5, member C [Source:ZFIN;Acc:ZDB-GENE-070929-271]                 | 6.303697649 | 0.280613501  | -3.513205747 | 2.510361839  |
| ENSORLG00000008111  | slc46a1         | solute carrier family 46 member 1 [Source:NCBI gene;Acc:101170694]                                           | 4.501814614 | -0.176228759 | -0.807631685 | 3.870896797  |
| ENSORLG00000011179  | zch6            | zinc finger CCHC-type containing 6 [Source:ZFIN;Acc:ZDB-GENE-120727-18]                                      | 3.436620712 | 1.039356745  | -0.147336639 | 2.250411654  |
| ENSORLG00000014879  | myct1a          | myc target 1a [Source:ZFIN;Acc:ZDB-GENE-041001-]                                                             | 3.272429056 | 0.83731284   | -1.096861841 | 1.2888987177 |
| ENSORLG00000008674  | clornf9         | Cl1 and TNF related 9 [Source:ZFIN;Acc:ZDB-GENE-080303-33]                                                   | 17.05716297 | -            | -17.05715778 | 0            |
| ENSORLG00000015708  | slc3kyp-110c    | complement C1q-like protein 4 [Source:NCBI gene;Acc:101185854]                                               | 5.73357242  | 2.523182233  | -3.942179483 | -0.731301938 |
| ENSORLG00000002966  | tf              | coagulation factor VIII, procoagulant component [Source:ZFIN;Acc:ZDB-GENE-090629-2]                          | 3.594806492 | 1.554058612  | -0.004908389 | 2.036232909  |
| ENSORLG00000010362  | nrarpa          | NOTCH regulated ankyrin repeat protein [Source:NCBI gene;Acc:11344263]                                       | 3.301281354 | 1.188567687  | -0.571768914 | 1.541411094  |
| ENSORLG00000000810  | -               | -                                                                                                            | 17.32585941 | 10.40590729  | -5.582361985 | 1.338060955  |
| ENSORLG00000003765  | rorca           | RAR-related orphan receptor C a [Source:ZFIN;Acc:ZDB-GENE-990415-250]                                        | 4.192207555 | 0.844314263  | -2.152810866 | 1.195565299  |
| ENSORLG00000012328  | slc3kyp-4e7.3   | slc3kyp-4e7.3 [Source:ZFIN;Acc:ZDB-GENE-070912-542]                                                          | 4.062640886 | 1.387250951  | -0.271651355 | 2.404223674  |
| ENSORLG00000010231  | G0S2            | G0S2/G0S2 switch 2 [Source:NCBI gene;Acc:101156888]                                                          | 5.463242254 | -0.523011966 | -5.501655431 | 0.485083973  |
| ENSORLG00000009983  | slc15a2         | solute carrier family 15 (oligosaccharide transporter), member 2 [Source:ZFIN;Acc:ZDB-GENE-030131-5866]      | 5.057322225 | 1.274697482  | -3.374659158 | 0.408450788  |
| ENSORLG00000008502  | RARB            | retinoic acid receptor beta [Source:HGNC Symbol;Acc:HGNC:5865]                                               | 4.939312346 | 3.000879595  | -2.866892637 | -0.929688593 |
| ENSORLG00000017312  | coll12a1a       | collagen, type XII, alpha 1a [Source:ZFIN;Acc:ZDB-GENE-090728-1]                                             | 3.071353457 | 1.98188703   | -2.997626513 | -1.907675031 |
| ENSORLG00000012894  | apbb3           | amyloid beta (A4) precursor protein-binding, family B, member 3 [Source:ZFIN;Acc:ZDB-GENE-140106-53]         | 3.256804997 | 1.675017188  | -1.08050548  | 0.501727283  |
| ENSORLG00000007430  | tmem204         | transmembrane protein 204 [Source:NCBI gene;Acc:101162065]                                                   | 4.426007512 | 1.854343096  | -2.39647291  | 0.175676264  |
| ENSORLG00000017556  | zpc113337       | zpc113337 [Source:ZFIN;Acc:ZDB-GENE-050306-20]                                                               | 7.502366103 | 3.750551067  | -2.104094545 | 1.748213999  |
| ENSORLG00000017667  | gata6           | GATA binding protein 6 [Source:NCBI gene;Acc:101159296]                                                      | 3.572710785 | 1.793673515  | -0.950929286 | 0.82852911   |
| ENSORLG00000015230  | slc3kyp-159a1b  | slc3kyp-159a1b.1 [Source:ZFIN;Acc:ZDB-GENE-041210-204]                                                       | 5.922953339 | 2.014676145  | -0.248656867 | 3.660104587  |
| ENSORLG00000000689  | HKI (1 of many) | hexokinase 1 [Source:NCBI gene;Acc:101157031]                                                                | 3.821738986 | 2.45849502   | -1.143788272 | 0.222581829  |
| ENSORLG00000011031  | -               | -                                                                                                            | 5.297886363 | 2.217792509  | -2.370514258 | 1.288935671  |
| ENSORLG00000009269  | abcd4           | ATP-binding cassette, sub-family B (MDR/TAP), member 4 [Source:ZFIN;Acc:ZDB-GENE-080204-50]                  | 3.681476511 | -0.884080669 | -2.913708245 | 1.652333857  |
| ENSORLG00000009061  | cxcl12a         | chemokine (C-X-C motif) ligand 12, chemokine receptor 1-derived factor 1 [Source:ZFIN;Acc:ZDB-GENE-030318-]  | 4.416944113 | 1.957916649  | -2.95954791  | -0.500035509 |
| ENSORLG00000010189  | cdgfr1          | platelet derived growth factor receptor like [Source:NCBI gene;Acc:101165739]                                | 5.579981562 | -1.295697799 | -5.173881386 | 1.70229317   |
| ENSORLG00000003554  | hntp1b          | formin binding protein 1b [Source:ZFIN;Acc:ZDB-GENE-091117-61]                                               | 3.382267829 | 1.442548161  | 0.659065786  | 2.599270279  |
| ENSORLG00000004253  | -               | -                                                                                                            | 6.846993847 | 1.022954516  | -5.84048149  | -0.015961426 |
| ENSORLG00000017187  | -               | -                                                                                                            | 4.771748489 | -12.47916891 | -5.769103159 | 11.48232395  |
| ENSORLG00000010042  | agtr1b          | angiotensin II receptor, type 1b [Source:ZFIN;Acc:ZDB-GENE-110411-117]                                       | 3.756930834 | 0.816916552  | -1.334835165 | 1.605666065  |
| ENSORLG00000000773  | slc3kyp-2341a   | slc3kyp-2341a.1 [Source:ZFIN;Acc:ZDB-GENE-131121-422]                                                        | 16.68214544 | 13.58744235  | -0.179295701 | 2.915874164  |
| ENSORLG00000016860  | slc3h211-251b   | glutamate receptor 1 [Source:NCBI gene;Acc:101161898]                                                        | 4.435400224 | 1.8054466    | -2.685170002 | -0.054731382 |
| ENSORLG00000000060  | brsk2b          | BR serine/threonine kinase 2b [Source:ZFIN;Acc:ZDB-GENE-100422-3]                                            | 4.990533541 | 1.046711888  | -1.392731658 | 2.551576918  |
| ENSORLG00000006436  | -               | -                                                                                                            | 3.188918896 | 0.762301594  | -2.801719719 | -0.394618029 |
| ENSORLG00000007024  | -               | -                                                                                                            | 3.827123773 | 0.572426506  | -1.3724814   | 1.885698848  |
| ENSORLG00000011866  | cerk            | ceramide kinase [Source:ZFIN;Acc:ZDB-GENE-041210-210]                                                        | 4.805589893 | 1.53438212   | -0.464387364 | 2.807305373  |
| ENSORLG00000001411  | -               | -                                                                                                            | 3.075692745 | -0.467022515 | -2.176468644 | 1.416731224  |
| ENSORLG00000010169  | runx2b          | run1-related transcription factor 2b [Source:ZFIN;Acc:ZDB-GENE-040629-4]                                     | 6.088456442 | 2.263313281  | -1.558298862 | 2.267337601  |
| ENSORLG00000016832  | -               | -                                                                                                            | 4.681775423 | 2.455211748  | 0.235868253  | 2.462916678  |
| ENSORLG00000004731  | -               | -                                                                                                            | 15.89803495 | 9.994692855  | -5.581066636 | 3.22739529   |
| ENSORLG00000000391  | zpc138461       | zpc138461 [Source:NCBI gene;Acc:101161898]                                                                   | 7.267886421 | 1.455982041  | -6.70146617  | -0.888093864 |
| ENSORLG00000004610  | zrb33a          | cyclic AMP-responsive element-binding protein 3-like protein 3-A [Source:NCBI gene;Acc:101171478]            | 5.499380209 | 1.824464451  | -1.479175471 | 2.196228957  |
| ENSORLG00000011102  | -               | -                                                                                                            | 4.848298521 | 2.100451193  | -0.991884744 | 1.754447055  |
| ENSORLG00000006725  | -               | -                                                                                                            | 3.224772899 | 0.173797967  | -2.626302063 | 0.425157228  |
| ENSORLG00000016341  | -               | -                                                                                                            | 3.034207641 | 0.337703999  | -0.704757396 | 1.992235962  |
| ENSORLG00000006891  | -               | -                                                                                                            | 3.984935857 | 0.884935857  | -0.844703585 | 1.55844798   |
| ENSORLG00000005362  | -               | -                                                                                                            | 3.95269544  | 2.775203198  | -0.358067317 | 0.827484433  |
| ENSORLG00000004515  | -               | -                                                                                                            | 4.831097364 | 1.425215112  | -0.476203093 | 2.930146081  |
| ENSORLG00000012369  | -               | -                                                                                                            | 3.835296984 | 2.242823701  | -1.27338981  | 0.37388951   |
| ENSORLG00000009734  | plek2           | pleckstrin 2 [Source:ZFIN;Acc:ZDB-GENE-080219-2]                                                             | 5.475782685 | 1.61351398   | -2.150718099 | 1.712031276  |
| ENSORLG00000006646  | psmt8a          | proteasome subunit beta 8a [Source:ZFIN;Acc:ZDB-GENE-990415-140]                                             | 5.275748857 | 2.01778881   | -1.469128831 | 1.789316341  |
| ENSORLG00000000918  | efl1            | E74-like E12 transcription factor 1 [Source:ZFIN;Acc:ZDB-GENE-980526-335]                                    | 3.762036728 | 0.588745586  | -2.935620538 | 0.238156135  |
| ENSORLG00000005755  | rspo3           | Oryzias latipes R-spondin 3 (rspo3), mRNA [Source:RefSeq mRNA;Acc:NM_00129248]                               | 5.94472652  | 0.765571189  | -2.686708295 | 2.492930307  |
| ENSORLG00000016855  | SKI             | SKI proto-oncogene [Source:HGNC Symbol;Acc:HGNC:10896]                                                       | 4.741702179 | 1.761105162  | -2.605393482 | 0.375687946  |
| ENSORLG00000006683  | gpm1b           | G protein signaling modulator 1b [Source:ZFIN;Acc:ZDB-GENE-1110203-5]                                        | 3.343503217 | 1.524679768  | 0.846919044  | 2.66622704   |
| ENSORLG00000011745  | rfl0            | interferon regulatory factor 10 [Source:ZFIN;Acc:ZDB-GENE-040426-2084]                                       | 4.79451194  | 1.696512976  | -1.545584877 | 1.552898416  |
| ENSORLG00000002861  | -               | -                                                                                                            | 4.593195724 | 0.948319352  | -4.543617479 | -0.899256571 |
| ENSORLG00000000238  | -               | -                                                                                                            | 5.079468459 | 0.158824428  | -2.703811055 | 2.217318856  |
| ENSORLG00000012812  | -               | -                                                                                                            | 3.267478224 | 2.020316272  | -0.226395234 | 1.02125155   |
| ENSORLG00000009338  | slc3h211-161h   | uncharacterized LOC101165601 [Source:NCBI gene;Acc:101165601]                                                | 4.579047917 | 1.200274393  | -0.465883123 | 2.913427116  |
| ENSORLG00000000349  | slc3h211-762j   | uncharacterized LOC101172412 [Source:NCBI gene;Acc:101172412]                                                | 5.300496198 | 0.401587774  | -3.416653362 | 1.482738568  |

|                      |                 |                                                                                                                |             |              |              |              |
|----------------------|-----------------|----------------------------------------------------------------------------------------------------------------|-------------|--------------|--------------|--------------|
| ENSORLG00000005490   | KLF5            | Kruppel like factor 5 [Source:HGNC Symbol;Acc:HGNC:6349]                                                       | 4.739686663 | 0.97211995   | -2.22486963  | 1.543184199  |
| ENSORLG00000008664   | ZNF503 (1 of 2) | zinc finger protein 503 [Source:NCBI gene;Acc:101155151]                                                       | 4.391903561 | 1.271804088  | -2.528719757 | 0.591863384  |
| ENSORLG00000007251   | twist1          | Oryzias latipes twist family bHLH transcription factor 1 (twist1, mRNA, [Source:RefSeq mRNA;Acc:NM_001104707]) | 5.349524748 | 0.37404307   | -2.672716532 | 2.303250607  |
| ENSORLG000000015327  | pip5k1ca        | phosphatidylinositol-4-phosphate 5-kinase, type 1, gamma a [Source:ZFIN;Acc:ZDB-GENE-050208-388]               | 4.617531578 | 2.356365741  | 0.447068071  | 2.708717143  |
| ENSORLG000000011369  | sparc           | secreted protein acidic and cysteine rich [Source:NCBI gene;Acc:100049536]                                     | 4.578540522 | 2.659840421  | -0.827896143 | 1.09129898   |
| ENSORLG000000017784  | placr1          | PI-ACB, like 1 [Source:ZFIN;Acc:ZDB-GENE-091204-165]                                                           | 3.064207746 | -0.542527987 | -1.177751907 | 1.828014201  |
| ENSORLG00000001590   | placr1          | PI-ACB, like 1 [Source:ZFIN;Acc:ZDB-GENE-091204-165]                                                           | 5.244071442 | 0.65499918   | -2.083193107 | 2.526403074  |
| ENSORLG00000001285   | uroc1           | urocanate hydratase 1 [Source:NCBI gene;Acc:101174658]                                                         | 7.582490988 | 3.186387252  | -1.614484687 | 2.782124701  |
| ENSORLG000000011278  | -               | -                                                                                                              | 3.514323938 | 1.260681224  | 0.472744218  | 2.728870975  |
| ENSORLG000000017340  | sidkey-121j17   | sidkey-121j17.5 [Source:ZFIN;Acc:ZDB-GENE-030131-4745]                                                         | 3.254402234 | -0.366908066 | -1.008932919 | 2.612861276  |
| ENSORLG000000013335  | RF9             | interferon regulatory factor 9 [Source:HGNC Symbol;Acc:HGNC:61311]                                             | 4.062769782 | 1.163002195  | -1.669244948 | 1.231007208  |
| ENSORLG00000001780   | sox2            | SOX3 protein [Source:NCBI gene;Acc:1000493268]                                                                 | 5.234865826 | 0.754818193  | -1.787379463 | 2.693189614  |
| ENSORLG000000005823  | -               | complement factor properdin [Source:NCBI gene;Acc:101154973]                                                   | 3.565965848 | 2.310200627  | -2.521177729 | -1.264927499 |
| ENSORLG000000010261  | -               | -                                                                                                              | 3.906016995 | 2.447579044  | -0.092731977 | 1.366191783  |
| ENSORLG000000017415  | matk            | megakaryocyte-associated tyrosine kinase [Source:ZFIN;Acc:ZDB-GENE-070705-183]                                 | 3.632150066 | 1.24723067   | -1.769519762 | 0.615889874  |
| ENSORLG000000009298  | elk3 (1 of 2)   | ELK3, ETS-domain protein [Source:ZFIN;Acc:ZDB-GENE-030716-2]                                                   | 5.193897557 | 1.226375057  | -1.997980925 | 1.970024763  |
| ENSORLG000000007167  | brd2            | bromodomain-related gene family, member 2 [Source:ZFIN;Acc:ZDB-GENE-060825-228]                                | 3.775009111 | -2.486128329 | -1.444659725 | 4.816959833  |
| ENSORLG000000002183  | mbnl3           | muscleblind-like splicing regulator 3 [Source:ZFIN;Acc:ZDB-GENE-081002-3]                                      | 4.321189872 | 1.178136321  | -0.219588168 | 2.923950296  |
| ENSORLG000000000410  | shp2            | calcium- and lipopolysaccharide-induced protein kinase 2 [Source:ZFIN;Acc:ZDB-GENE-030131-5810]                | 6.657802245 | 2.015251353  | -3.619323988 | 1.03401007   |
| ENSORLG000000016232  | -               | -                                                                                                              | 18.59602758 | 13.59643787  | -1.186133429 | 1.787723788  |
| ENSORLG000000002876  | -               | claudin 5 [Source:NCBI gene;Acc:101173553]                                                                     | 4.72163541  | 1.842338364  | -3.355748833 | 2.07032411   |
| ENSORLG000000002819  | -               | -                                                                                                              | 4.041288356 | -0.129182608 | -2.410665004 | 1.760392624  |
| ENSORLG000000012806  | orb-62m         | b2 microglobulin [Source:NCBI gene;Acc:100049185]                                                              | 5.728197733 | 1.740978843  | -2.121743518 | 1.86659394   |
| ENSORLG000000002927  | -               | -                                                                                                              | 3.92729318  | -0.9349375   | -1.950180979 | 3.76349012   |
| ENSORLG000000006556  | akor1           | vitamin K epoxide reductase complex, subunit 1 [Source:ZFIN;Acc:ZDB-GENE-030131-2886]                          | 3.014390309 | 1.295903831  | -0.068941897 | 1.650029462  |
| ENSORLG000000014973  | htra1b          | HtrA serine peptidase 1 [Source:NCBI gene;Acc:101160199]                                                       | 3.046161904 | -0.318602883 | -2.188626527 | 1.176623381  |
| ENSORLG000000009151  | -               | -                                                                                                              | 3.403306831 | 0.452807012  | -0.655442315 | 2.295542588  |
| ENSORLG000000018161  | qor132b         | G protein-coupled receptor 132b [Source:ZFIN;Acc:ZDB-GENE-040724-83]                                           | 3.386122824 | -1.574739083 | -1.081115696 | 3.880229519  |
| ENSORLG000000014919  | -               | -                                                                                                              | 4.277547335 | 3.613655117  | -0.52120362  | 0.143170419  |
| ENSORLG000000011273  | col1a1b         | collagen, type I, alpha 1b [Source:ZFIN;Acc:ZDB-GENE-030131-4400]                                              | 5.261473093 | 2.067714767  | -4.033065645 | -0.840822291 |
| ENSORLG000000015981  | myf1            | myosin light chain 1, skeletal muscle isoform [Source:NCBI gene;Acc:101167500]                                 | 3.741705665 | 0.234810104  | -0.641508833 | -2.53412596  |
| ENSORLG000000012809  | -               | -                                                                                                              | 3.004525253 | 2.27151341   | -0.634767113 | 0.148771968  |
| ENSORLG000000012247  | -               | -                                                                                                              | 3.897895251 | 1.294431062  | -1.297318769 | 1.306584607  |
| ENSORLG000000004735  | lmo2            | LIM domain only 2 (rhombotin-like 1) [Source:ZFIN;Acc:ZDB-GENE-980526-419]                                     | 6.360719907 | 1.6588261    | -2.611094617 | 2.09128562   |
| ENSORLG000000005705  | -               | -                                                                                                              | 4.036248302 | 1.850103807  | -1.907489422 | 0.279139881  |
| ENSORLG0000000021759 | -               | -                                                                                                              | 4.511827187 | 1.170090733  | -1.119041108 | 2.223179001  |
| ENSORLG000000018031  | col25a          | C-2 motif chondronin 20 [Source:NCBI gene;Acc:101171112]                                                       | 6.133030194 | 0.121987856  | -3.097421901 | 2.914384299  |
| ENSORLG000000012671  | -               | -                                                                                                              | 4.333612814 | 2.933506588  | -2.091568536 | -0.690977701 |
| ENSORLG000000017352  | qsox1           | quiescin Q6 sulfhydryl oxidase 1 [Source:ZFIN;Acc:ZDB-GENE-030131-7018]                                        | 16.14661044 | 14.21062341  | -3.261693401 | -0.425239222 |
| ENSORLG000000016549  | mob3c           | MOB kinase activator 3C [Source:ZFIN;Acc:ZDB-GENE-040704-32]                                                   | 3.895399488 | 3.055027698  | 0.61370594   | 1.454561428  |
| ENSORLG000000005216  | scad8           | scyl1-CoA dihydrogenase family member 8 [Source:NCBI gene;Acc:101188062]                                       | 3.81868258  | 1.17720354   | -0.721058737 | 1.920905778  |
| ENSORLG000000009017  | -               | beta-crystallin B3-like [Source:NCBI gene;Acc:10111323]                                                        | 6.794531982 | 0.552418671  | -5.764708255 | 0.47789539   |
| ENSORLG000000004090  | cdk6            | cyclin dependent kinase 6 [Source:NCBI gene;Acc:101168879]                                                     | 4.298889946 | 1.814508873  | -0.765262986 | 1.719701891  |
| ENSORLG000000010944  | ctnnd1          | catenin (cadherin-associated protein), delta 1 [Source:ZFIN;Acc:ZDB-GENE-110208-9]                             | 4.771913785 | 0.406361697  | -1.64118629  | 2.724850316  |
| ENSORLG000000013127  | meis2a          | Meis homeobox 2 [Source:NCBI gene;Acc:101174873]                                                               | 5.164361882 | 1.783370116  | -2.416098238 | 0.96539669   |
| ENSORLG000000015959  | -               | -                                                                                                              | 6.149707589 | 3.394693681  | -1.227411649 | 1.528088690  |
| ENSORLG000000014886  | rorcb           | RAR-related orphan receptor c b [Source:ZFIN;Acc:ZDB-GENE-040724-215]                                          | 4.637352788 | 1.983920376  | -1.751351346 | 0.90256572   |
| ENSORLG000000004418  | ppp1r9a         | protein phosphatase 1, regulatory subunit 9A [Source:ZFIN;Acc:ZDB-GENE-060503-860]                             | 5.276035028 | 2.328787263  | -0.226885996 | 0.920848235  |
| ENSORLG000000003750  | arg             | arylsulfatase G [Source:ZFIN;Acc:ZDB-GENE-060503-154]                                                          | 4.960256697 | 2.956954072  | 0.067968117  | 1.071572221  |
| ENSORLG000000017047  | PLD4            | phospholipase D family member 4 [Source:HGNC Symbol;Acc:HGNC:23782]                                            | 4.776842794 | 2.698788288  | -0.925247093 | 1.152392515  |
| ENSORLG000000003559  | slc43a1a        | transporter, member 1a [Source:ZFIN;Acc:ZDB-GENE-040724-215]                                                   | 5.891831357 | 1.80827994   | -1.174980713 | 2.909126813  |
| ENSORLG000000016195  | zfp395b         | zinc finger protein 395b [Source:ZFIN;Acc:ZDB-GENE-041001-193]                                                 | 4.055800027 | 1.987441528  | 0.24254988   | 2.311393955  |
| ENSORLG000000003794  | -               | -                                                                                                              | 5.179715207 | 2.303655528  | -0.9229684   | 1.953577947  |
| ENSORLG000000003975  | kbtbp10a        | FKBP binding protein 10a [Source:ZFIN;Acc:ZDB-GENE-100821-75]                                                  | 3.601697969 | 1.713738805  | 0.671598918  | 2.560045202  |
| ENSORLG000000013155  | -               | -                                                                                                              | 3.127169475 | 1.240760688  | -2.947121403 | -1.260277629 |
| ENSORLG000000012333  | trn1            | triple helix homolog 1 [Source:NCBI gene;Acc:101160746]                                                        | 5.102658631 | 0.46881083   | -4.134853101 | 0.448314722  |
| ENSORLG000000005412  | amot            | angiostatin [Source:ZFIN;Acc:ZDB-GENE-030131-7487]                                                             | 4.943021988 | 2.208813139  | -0.607425109 | 2.127268794  |
| ENSORLG000000003973  | kaznb           | kazrin, nephrin interacting protein b [Source:ZFIN;Acc:ZDB-GENE-030131-311]                                    | 4.774961392 | 1.574948892  | -1.374992928 | 1.825498686  |
| ENSORLG000000008798  | KCNMA1 (1 of 2) | potassium calcium-activated channel subfamily M alpha 1 [Source:HGNC Symbol;Acc:HGNC:6284]                     | 3.078494984 | 0.510292922  | -1.362591304 | 1.206088842  |
| ENSORLG000000003021  | st8a6           | Oryzias latipes alpha-2,8-sialyltransferase ST8Sia VI (st8a6), mRNA, [Source:RefSeq mRNA;Acc:NM_001104905]     | 3.854618967 | 1.8324377    | -1.057446194 | 0.965220237  |
| ENSORLG000000001705  | xtmb            | protein tyrosine phosphatase, receptor type, Nb [Source:ZFIN;Acc:ZDB-GENE-110605-1]                            | 3.183164287 | 0.65660123   | -1.481567798 | 1.046020918  |
| ENSORLG000000016254  | lin7a           | lin-7 homolog A (C. elegans) [Source:ZFIN;Acc:ZDB-GENE-040426-1665]                                            | 3.57378169  | 2.735620097  | -0.099026474 | 0.739619917  |
| ENSORLG000000016820  | -               | uncharacterized LOC101162953 [Source:NCBI gene;Acc:101162953]                                                  | 16.6088462  | 10.56750932  | -3.292620433 | 2.749179261  |
| ENSORLG000000017122  | gata3           | GATA binding protein 3 [Source:ZFIN;Acc:ZDB-GENE-990415-82]                                                    | 4.810897244 | -0.23193759  | -3.171008543 | 1.872312403  |
| ENSORLG000000007186  | bapry           | B-box and SPRY domain containing [Source:ZFIN;Acc:ZDB-GENE-060526-219]                                         | 5.651789462 | 2.109395835  | -2.340262891 | 1.202615416  |
| ENSORLG000000012289  | rsp2            | cysteine and glycine-rich protein 2 [Source:NCBI gene;Acc:10117174]                                            | 5.154242963 | 1.562123761  | -0.634922369 | 2.957881211  |
| ENSORLG000000001162  | -               | -                                                                                                              | 4.089000667 | 2.449974196  | -0.668595988 | 0.979199597  |
| ENSORLG000000006090  | qpl1b           | Spi-1 proto-oncogene b [Source:ZFIN;Acc:ZDB-GENE-980526-164]                                                   | 3.817823343 | 2.724539385  | -1.786545624 | -0.692776488 |
| ENSORLG000000014806  | tbox4           | T-box 4 [Source:NCBI gene;Acc:10117998]                                                                        | 4.092276847 | -0.200671653 | -3.007955221 | 1.285478727  |
| ENSORLG000000014364  | tgaab6          | integrin, alpha 6b [Source:ZFIN;Acc:ZDB-GENE-050320-9]                                                         | 3.724483837 | 1.997393703  | 0.366525393  | 2.094100826  |

|                     |                |                                                                                                                                              |              |              |              |              |
|---------------------|----------------|----------------------------------------------------------------------------------------------------------------------------------------------|--------------|--------------|--------------|--------------|
| ENSORLG0000004392   | sgpe           | sarcoglycan, epsilon [Source:ZFIN;Acc:ZDB-GENE-030724.1]                                                                                     | 4.036959787  | 1.621053728  | 0.414094462  | 2.830485839  |
| ENSORLG0000005938   | stp2a1         | sarcoplasmic/endoplasmic reticulum calcium ATPase 1 [Source:NCBI;gene:Acc:101171864]                                                         | 6.334076992  | 0.946001909  | -5.39897999  | -0.010424465 |
| ENSORLG0000004782   | prune2         | prune Homolog 2 (Drosophila) [Source:ZFIN;Acc:ZDB-GENE-050309-222]                                                                           | 4.843749314  | -0.357482227 | -2.080546291 | 3.121172307  |
| ENSORLG0000009882   | -              | -                                                                                                                                            | 3.900904808  | -0.926651306 | -0.865505296 | 3.962533941  |
| ENSORLG00000013049  | -              | -                                                                                                                                            | 3.952308967  | 1.613426645  | -0.004562148 | 2.334805161  |
| ENSORLG0000004588   | slc4eyv-28n1b  | soliton titin-4 [Source:NCBI;gene:Acc:101168453]                                                                                             | 3.326286513  | 0.66128161   | 0.127170882  | 2.790662534  |
| ENSORLG0000003323   | hepb           | heposmidase B (beta polytypicide) [Source:ZFIN;Acc:ZDB-GENE-030131-2333]                                                                     | 3.102809433  | 0.342108176  | -2.249213333 | 0.511972886  |
| ENSORLG00000013892  | ankrd13b       | ankyrin repeat domain 13B [Source:ZFIN;Acc:ZDB-GENE-050913-151]                                                                              | 5.085955187  | 0.879568415  | -1.218136556 | 2.988644864  |
| ENSORLG00000002735  | ahcg2a         | ATP-binding cassette, sub-family G (WHITE), member 2a [Source:ZFIN;Acc:ZDB-GENE-050517-35]                                                   | 4.371119333  | 0.258495174  | -2.271084943 | 1.842024295  |
| ENSORLG00000000021  | -              | -                                                                                                                                            | 3.268035518  | 1.44254963   | 0.408649457  | 2.230620738  |
| ENSORLG00000007327  | galnt18b       | polypeptide N-acetylgalactosaminyltransferase 18 [Source:NCBI;gene:Acc:101158340]                                                            | 4.026517422  | 2.565917989  | -0.152517582 | 1.308566054  |
| ENSORLG00000010857  | ddr2b          | discoidin domain receptor tyrosine kinase 2b [Source:ZFIN;Acc:ZDB-GENE-060503-361]                                                           | 4.491963934  | 2.277485872  | 0.297544225  | 2.51251003   |
| ENSORLG00000012927  | -              | -                                                                                                                                            | 3.38045259   | 0.534166688  | -1.264938467 | 1.581831287  |
| ENSORLG00000012710  | -              | -                                                                                                                                            | 4.394858138  | 0.735636703  | -1.867550882 | 1.790598879  |
| ENSORLG00000006370  | tead3b         | TEA domain family member 3 b [Source:ZFIN;Acc:ZDB-GENE-080103-3]                                                                             | 3.065954236  | 1.294854425  | 0.712136004  | 2.483720417  |
| ENSORLG00000017995  | lox5b          | lysyl oxidase-like 5b [Source:ZFIN;Acc:ZDB-GENE-070818-3]                                                                                    | 6.553391427  | 0.749386998  | -1.231638797 | 4.572859393  |
| ENSORLG00000011645  | mid11p1a       | MID1 interacting protein 1a [Source:ZFIN;Acc:ZDB-GENE-990415-81]                                                                             | 3.786683829  | 0.049036758  | -1.739111963 | 1.999200033  |
| ENSORLG00000012805  | pck1           | phosphoenolpyruvate carboxylase 1 (soluble) [Source:ZFIN;Acc:ZDB-GENE-030909-11]                                                             | 6.753236345  | 0.122523888  | -5.559201607 | 1.071995765  |
| ENSORLG00000009349  | mrx1 (1 of m)  | myeloperoxidase-specific peroxidase [Source:ZFIN;Acc:ZDB-GENE-030131-3460]                                                                   | 4.512336412  | 1.331772347  | -3.186009127 | -0.004959791 |
| ENSORLG00000012238  | kat2b          | Klvs10 acetyltransferase 2B [Source:ZFIN;Acc:ZDB-GENE-060503-207]                                                                            | 3.81760459   | 2.17754179   | 0.068151907  | 1.708701109  |
| ENSORLG000000009715 | slc43a2a       | solute carrier family 43 member 2a (transporter), member 2a [Source:ZFIN;Acc:ZDB-GENE-slch211-18b17.2 [Source:ZFIN;Acc:ZDB-GENE-030131-5404] | 4.166239629  | 1.995254582  | -0.363502204 | 1.80796772   |
| ENSORLG00000004406  | slch211-18b17  | -                                                                                                                                            | 3.37380799   | 0.345311706  | -2.475087659 | 0.553893421  |
| ENSORLG00000011021  | SLC49A3        | solute carrier family 49 member 3 [Source:NCBI;gene:Acc:101171677]                                                                           | 5.108174942  | 1.685635017  | -1.10908317  | 2.313941721  |
| ENSORLG000000101737 | notch3         | notch 3 [Source:ZFIN;Acc:ZDB-GENE-000329-5]                                                                                                  | 5.759187179  | 3.05848572   | -3.384142906 | 0.689357787  |
| ENSORLG00000006980  | notch3         | -                                                                                                                                            | 4.030487747  | 2.074238897  | -1.434739788 | 0.498004001  |
| ENSORLG00000006659  | bcl6b          | B-cell CLL/lymphoma 6, member B [Source:ZFIN;Acc:ZDB-GENE-120907-11]                                                                         | 3.924769947  | 1.458894335  | -1.2289678   | 1.237392942  |
| ENSORLG000000004959 | nccrp1         | non-specific cytotoxic cell receptor protein 1 homolog (zebrafish) [Source:NCBI;gene:Acc:101166487]                                          | 3.82390573   | 1.450987244  | -1.891319991 | 0.482082921  |
| ENSORLG00000006006  | -              | -                                                                                                                                            | 4.107951541  | -1.931448474 | -3.114625966 | 2.925261863  |
| ENSORLG00000005142  | -              | -                                                                                                                                            | 5.1661575    | 3.667238441  | -1.78544579  | -0.286035567 |
| ENSORLG00000016636  | igfbp6b        | insulin-like growth factor-binding protein 5 [Source:NCBI;gene:Acc:101169782]                                                                | 3.143474343  | 0.744389205  | -1.065242471 | 1.314327728  |
| ENSORLG00000006827  | zpc194312      | zpc194312 [Source:ZFIN;Acc:ZDB-GENE-081022-102]                                                                                              | 4.316242827  | 1.579994012  | -3.48028262  | -0.743550147 |
| ENSORLG00000011742  | rasp1          | Ras interacting protein 1 [Source:ZFIN;Acc:ZDB-GENE-120403-3]                                                                                | 3.815985015  | 2.981649441  | 0.3154835    | 1.150305523  |
| ENSORLG00000009915  | -              | -                                                                                                                                            | 5.458988775  | 1.008173109  | -1.62878722  | 2.822433374  |
| ENSORLG00000014723  | ppdpfa         | pancreatic progenitor cell differentiation and proliferation factor a [Source:ZFIN;Acc:ZDB-GENE-030219-204]                                  | 6.120828034  | 1.833159834  | -4.406748347 | -0.11899548  |
| ENSORLG00000013711  | RX5            | riboques homelobin 5 [Source:HGNC Symbol;Acc:HGNC:14351]                                                                                     | 3.017234182  | 2.32440747   | -1.759076061 | -1.065764858 |
| ENSORLG00000006415  | -              | -                                                                                                                                            | 18.628660427 | 10.96657755  | -4.684208265 | 7.966638817  |
| ENSORLG00000013711  | -              | -                                                                                                                                            | 3.407733828  | 1.357465311  | -0.363916139 | 1.686821366  |
| ENSORLG00000010410  | sh3bgr1        | SH3 domain binding glutamate-rich protein like [Source:ZFIN;Acc:ZDB-GENE-040426-1376]                                                        | 3.13928051   | 2.314524306  | 0.588396355  | 1.413637628  |
| ENSORLG000000051012 | col2a1a        | Oryzias latipes collagen type II A (col2a1a), mRNA [Source:RefSeq; mRNA; Acc:NM_0248659]                                                     | 3.178352637  | 2.231170855  | -3.23921704  | -1.381555762 |
| ENSORLG00000009155  | slc4key-266m15 | slc4key-266m15.5 [Source:ZFIN;Acc:ZDB-GENE-070705-442]                                                                                       | 4.146502684  | 2.207156711  | -0.331572193 | 1.608258495  |
| ENSORLG00000009052  | ripk3          | receptor-interacting serine-threonine kinase 3 [Source:ZFIN;Acc:ZDB-GENE-071115-4]                                                           | 5.195706184  | 1.715183967  | -3.500117032 | -0.019110216 |
| ENSORLG00000004432  | PPARG          | peroxisome proliferator activated receptor gamma [Source:HGNC Symbol;Acc:HGNC:9238]                                                          | 4.377478104  | 1.686469184  | -1.683674834 | 1.087819972  |
| ENSORLG00000006954  | trm35-12       | tripeptide motif containing 35-12 [Source:ZFIN;Acc:ZDB-GENE-110920-4]                                                                        | 6.368519484  | 1.189692574  | -2.984778883 | 2.194535073  |
| ENSORLG000000009881 | slc22a7a       | solute carrier family 22 (organic anion transporter), member 7a [Source:ZFIN;Acc:ZDB-GENE-050506-52]                                         | 3.616947677  | 0.151243441  | -4.156598965 | -0.690413352 |
| ENSORLG000000013177 | vnt1           | vesicle amine transport 1 [Source:ZFIN;Acc:ZDB-GENE-030616-178]                                                                              | 4.207450298  | 2.178399427  | -1.19647198  | 0.833118728  |
| ENSORLG00000007485  | znf385a        | zinc finger protein 385A [Source:ZFIN;Acc:ZDB-GENE-090313-255]                                                                               | 4.486110103  | 1.23448233   | -2.946083137 | 0.306032128  |
| ENSORLG00000006265  | selnmom        | selenoprotein M [Source:ZFIN;Acc:ZDB-GENE-030410-04026-1289]                                                                                 | 4.334653627  | 2.693365285  | -0.152541332 | 1.489231663  |
| ENSORLG00000007736  | pata2a         | GATA-binding factor 2 [Source:NCBI;gene:Acc:101161391]                                                                                       | 4.710775921  | 0.861396687  | -2.627352534 | 1.22251261   |
| ENSORLG00000014926  | plekhf1        | pleckstrin homology domain containing, family F (with FYVE domain) member 1 [Source:ZFIN;Acc:ZDB-GENE-040408-1289]                           | 16.10239753  | 0            | -3.045397446 | 13.05749258  |
| ENSORLG00000016885  | GNA11 (1 of m) | guanine nucleotide-binding protein G(i) subunit alpha [Source:NCBI;gene:Acc:101158934]                                                       | 3.156453728  | 0.596253215  | -0.83451817  | 1.726167661  |
| ENSORLG00000016641  | casin1         | CASK interacting protein 1 [Source:ZFIN;Acc:ZDB-GENE-071115-3]                                                                               | 3.696403479  | 1.506267648  | -1.458419389 | 0.730201266  |
| ENSORLG000000061659 | slch211-153b   | slch211-153b23.4 [Source:ZFIN;Acc:ZDB-GENE-030131-7329]                                                                                      | 3.981379635  | 1.425254123  | -1.525668883 | 0.391083191  |
| ENSORLG00000017370  | -              | uncharacterized LOC101161631 [Source:NCBI;gene:Acc:101161631]                                                                                | 5.363740047  | 1.65756761   | -2.792250522 | 0.914408854  |
| ENSORLG00000004290  | MPDZ (1 of m)  | multiple PDZ domain crumbs cell polarity complex component [Source:HGNC Symbol;Acc:HGNC:7208]                                                | 4.587703993  | 2.391187616  | -0.407685149 | 1.789314738  |
| ENSORLG000000021658 | mylpfa         | myosin light chain, phosphorylatable, fast skeletal muscle a [Source:ZFIN;Acc:ZDB-GENE-990712-15]                                            | 6.300930238  | 5.02295267   | -10.94037035 | -4.116002128 |
| ENSORLG00000010342  | kif7b          | Kinesin-like factor 7b [Source:ZFIN;Acc:ZDB-GENE-041014-171]                                                                                 | 5.099076035  | 2.578572216  | -0.755830626 | 1.76515472   |
| ENSORLG00000003178  | -              | -                                                                                                                                            | 3.606030998  | -0.891619404 | -0.927915421 | 3.570222206  |
| ENSORLG00000014456  | tpia           | tissue factor pathway inhibitor a [Source:ZFIN;Acc:ZDB-GENE-030711-1]                                                                        | 5.160657701  | -0.188255232 | -3.008429651 | 2.340968587  |
| ENSORLG00000016429  | -              | -                                                                                                                                            | 3.619600831  | 2.538080949  | -1.029859796 | 0.052145036  |
| ENSORLG00000007868  | qucy2d         | guanylate cyclase 2D, retinal [Source:ZFIN;Acc:ZDB-GENE-011128-9]                                                                            | 3.947644366  | 2.332752961  | -0.430962203 | 1.184413695  |
| ENSORLG00000007680  | cmbl           | carboxymethylglutaminylase homolog [Source:NCBI;gene:Acc:101171616]                                                                          | 3.141900812  | 0.971343241  | 0.021738422  | 2.192780725  |
| ENSORLG00000016402  | vdr            | Oryzias latipes vitamin D (1,25-dihydroxyvitamin D3) receptor (vdr), mRNA [Source:RefSeq; mRNA; Acc:NM_001128517]                            | 3.120066476  | 0.060388589  | -1.29317278  | 1.766899706  |
| ENSORLG00000010166  | slc7a2         | solute carrier family 7 member 2 [Source:NCBI;gene:Acc:101165487]                                                                            | 5.322947473  | 0.095393686  | -2.873804805 | 2.354234972  |
| ENSORLG00000012540  | pxdc1b         | PX domain containing 1 [Source:NCBI;gene:Acc:101165607]                                                                                      | 4.640245155  | 2.995636034  | -0.267584211 | 1.377509199  |
| ENSORLG00000006079  | slc22w6i       | solute carrier family 22 member 6 [Source:NCBI;gene:Acc:101168641]                                                                           | 6.877724768  | -0.701791334 | -5.630916679 | 1.948492906  |
| ENSORLG00000013845  | -              | -                                                                                                                                            | 5.860735513  | 2.044014911  | -2.064315831 | 1.75288778   |

|                    |               |                                                                                                                             |              |              |              |              |
|--------------------|---------------|-----------------------------------------------------------------------------------------------------------------------------|--------------|--------------|--------------|--------------|
| ENSRLO00000009418  | ve1a          | vinculin a [Source:ZFIN;Acc:ZDB-GENE-050506-61]                                                                             | 4.856194896  | 2.654586431  | -1.149654988 | 1.052437035  |
| ENSRLO00000011362  | dusp4         | dual specificity phosphatase 4 [Source:ZFIN;Acc:ZDB-GENE-040476-109]                                                        | 5.272344634  | -0.059173465 | -1.577894216 | 3.754106664  |
| ENSRLO00000006315  | nr2f5         | nuclear receptor subfamily 2 group F member 5 [Source:NCBI;gene:Acc:101174296]                                              | 4.418504357  | 0.602789032  | -2.717595999 | 1.098605478  |
| ENSRLO00000016896  | -             | -                                                                                                                           | 4.388824271  | 0.931505027  | -7.467625415 | 0.98897678   |
| ENSRLO00000016570  | -             | -                                                                                                                           | 3.26783029   | 2.280739373  | -1.191027273 | -0.213451583 |
| ENSRLO000000012490 | glf3          | GLI family zinc finger 3 [Source:ZFIN;Acc:ZDB-GENE-041111-162]                                                              | 4.511450875  | 1.682114558  | -0.971706591 | 1.858113598  |
| ENSRLO00000004902  | -             | -                                                                                                                           | 6.314043665  | 3.070614536  | -2.798891948 | 0.44507679   |
| ENSRLO00000007318  | mmp14a        | matrix metalloproteinase 14a (membrane-inserted) [Source:ZFIN;Acc:ZDB-GENE-030901-11]                                       | 3.261566337  | 2.314552132  | -1.185899533 | -0.23831175  |
| ENSRLO00000012076  | KCNK3         | potassium two pore domain channel subfamily K member 3 [Source:NCBI;gene:Acc:101167669]                                     | 5.617303062  | 2.804072831  | -1.558195966 | 1.255512778  |
| ENSRLO00000010866  | CLDN5         | claudin-5 [Source:NCBI;gene:Acc:101166566]                                                                                  | 4.4651649    | 1.968625675  | -3.088620208 | -0.587680666 |
| ENSRLO00000003465  | cyp26b1       | Cyp26a1-like cytochrome P450, family 28, subfamily B, polypeptide 1 (cyp26b1), mRNA [Source:RefSeq;transcript:NM_001278821] | 4.954290288  | 1.531337986  | -1.127641186 | 2.295793481  |
| ENSRLO00000001617  | -             | -                                                                                                                           | 5.580751487  | 1.489303931  | -7.488241899 | 7.6238904    |
| ENSRLO00000015028  | -             | -                                                                                                                           | 3.993017468  | -1.301421808 | -3.37067352  | 1.924251241  |
| ENSRLO00000007393  | zgc134058     | zgc134058 [Source:ZFIN;Acc:ZDB-GENE-060929-48]                                                                              | 3.870483404  | 0.501753601  | -0.536259683 | 2.832955529  |
| ENSRLO00000012858  | MAT1A         | methionine adenosyltransferase 1A [Source:HGNC;Symbol:Acc:HGNC:6903]                                                        | 3.441744233  | 2.025368366  | -1.23465156  | 0.182209686  |
| ENSRLO00000016620  | slc1key-235d1 | slc1key-235d1 [Source:ZFIN;Acc:ZDB-GENE-041014-243]                                                                         | 4.379577653  | 0.740924505  | -2.115018194 | 1.524119329  |
| ENSRLO00000016941  | THRA          | thyroid hormone receptor alpha [Source:HGNC;Symbol:Acc:HGNC:11796]                                                          | 3.248332195  | 1.010604936  | -1.670886502 | 0.567325114  |
| ENSRLO00000013461  | mitfb         | microphthalmia-associated transcription factor [Source:NCBI;gene:Acc:101165733]                                             | 5.739051788  | 3.486595123  | -0.53036837  | 1.722568438  |
| ENSRLO00000010611  | nf4           | neurophilin cytosolic factor 4 [Source:NCBI;gene:Acc:101171890]                                                             | 3.463469431  | 1.893068708  | -0.084477729 | 1.486407299  |
| ENSRLO00000019015  | KLF2          | Kruppel-like factor 2 [Source:NCBI;gene:Acc:101170127]                                                                      | 5.528020697  | 1.430574357  | -7.428329949 | 1.638601151  |
| ENSRLO00000001321  | eratp1b       | endoplasmic reticulum aminopeptidase 1b [Source:ZFIN;Acc:ZDB-GENE-040476-934]                                               | 3.566013605  | 1.079108934  | -2.063488049 | 0.417901473  |
| ENSRLO00000013048  | pyylt1b       | glycoside xylosyltransferase 1b [Source:ZFIN;Acc:ZDB-GENE-041210-118]                                                       | 3.11212787   | 1.420426148  | 1.297766847  | 2.989952883  |
| ENSRLO00000003707  | dnb2tpb       | DAB2 interacting protein b [Source:ZFIN;Acc:ZDB-GENE-030131-2449]                                                           | 3.681391685  | 0.871295611  | -1.168659399 | 1.641920802  |
| ENSRLO00000017983  | cd1           | complement factor D (cdpsn) [Source:ZFIN;Acc:ZDB-GENE-050522-411]                                                           | 3.932967185  | 2.76540052   | -0.998685341 | 0.171185989  |
| ENSRLO00000005107  | zinc1a        | JA2F zinc finger 1a [Source:ZFIN;Acc:ZDB-GENE-060503-482]                                                                   | 3.768955583  | 1.624577736  | -0.224585534 | 1.920277082  |
| ENSRLO00000005025  | -             | -                                                                                                                           | 5.814213854  | 1.398025946  | -4.235434948 | 0.181238343  |
| ENSRLO00000012601  | -             | isocitrate dehydrogenase [NADP] mitochondrial [Source:NCBI;gene:Acc:101166744]                                              | 4.289331491  | 0.91196107   | -6.680617134 | 2.727038722  |
| ENSRLO00000013422  | ARG1          | arginase 1 [Source:HGNC;Symbol:Acc:HGNC:663]                                                                                | 8.210352669  | 0.923858986  | -6.579751446 | 0.838700314  |
| ENSRLO00000016029  | tsparn9a      | tetraspanin 9a [Source:ZFIN;Acc:ZDB-GENE-060503-632]                                                                        | 3.970943297  | 1.822170711  | -1.836585203 | 0.31267338   |
| ENSRLO00000000655  | ampd1         | adenosine monophosphate deaminase 1 [Source:NCBI;gene:Acc:101172409]                                                        | 5.667454605  | 0.046863398  | -3.071647635 | 2.549435594  |
| ENSRLO00000004319  | col1a2        | collagen, type I, alpha 2 [Source:ZFIN;Acc:ZDB-GENE-030131-8415]                                                            | 5.148886364  | 2.037238394  | -4.017331727 | -0.905216882 |
| ENSRLO00000004132  | pld2r1        | phospholipase A2 receptor 1 [Source:ZFIN;Acc:ZDB-GENE-120223-11]                                                            | 3.075461269  | 1.743981577  | -0.518836998 | 0.813128284  |
| ENSRLO000000009951 | col21a1       | collagen, type XXI, alpha 1 [Source:ZFIN;Acc:ZDB-GENE-110607-31]                                                            | 5.877649695  | 3.368092607  | 0.013232301  | 2.52327806   |
| ENSRLO00000015339  | gp44a         | glutathione peroxidase 4a [Source:ZFIN;Acc:ZDB-GENE-030410-21]                                                              | 3.106227288  | 1.196045241  | -0.23746637  | 1.673200645  |
| ENSRLO00000016690  | wrgb          | retinoid X receptor, gamma b [Source:ZFIN;Acc:ZDB-GENE-040718-34]                                                           | 3.83834821   | 0.972336315  | -2.798817682 | 0.069678877  |
| ENSRLO00000015684  | prdm1a        | PR domain containing 1a, with ZNF domain [Source:ZFIN;Acc:ZDB-GENE-030131-2193]                                             | 3.76493368   | -0.049078314 | -1.029579974 | 2.721917019  |
| ENSRLO00000010969  | PLXND1        | olefin D1 [Source:HGNC;Symbol:Acc:HGNC:91071]                                                                               | 3.451999632  | 1.387330413  | -2.24719921  | -0.18204547  |
| ENSRLO00000016181  | pel12         | E3 ubiquitin-protein ligase pelino homolog 2 [Source:NCBI;gene:Acc:101166500]                                               | 4.10784576   | 1.705388149  | -0.877556893 | 1.525385664  |
| ENSRLO00000004818  | -             | -                                                                                                                           | 4.247045207  | 1.240045588  | -1.589643095 | 1.417480609  |
| ENSRLO000000000014 | -             | -                                                                                                                           | 3.742265713  | 0.884645425  | -0.854781467 | 2.00323273   |
| ENSRLO00000002990  | zgc163057     | hemoglobin subunit alpha-D [Source:NCBI;gene:Acc:101170468]                                                                 | 18.445898992 | 12.25114803  | -3.275040664 | 2.92017791   |
| ENSRLO00000016560  | ica1          | islet cell autoantigen 1 [Source:ZFIN;Acc:ZDB-GENE-040718-490]                                                              | 3.987056699  | 1.155519986  | -0.789014927 | 2.042992223  |
| ENSRLO00000006475  | slc19a1       | solute carrier family 19 (folate transporter), member 1 [Source:ZFIN;Acc:ZDB-GENE-110401-11]                                | 3.480984337  | 0.922701173  | -1.175111887 | 1.383655018  |
| ENSRLO00000002774  | -             | -                                                                                                                           | 3.96304837   | 1.636393061  | -0.210351303 | 2.096788485  |
| ENSRLO00000015717  | zgc113307     | zgc113307 [Source:ZFIN;Acc:ZDB-GENE-050522-29]                                                                              | 5.079785335  | -1.361103166 | -2.283410093 | 4.194864941  |
| ENSRLO00000012375  | -             | -                                                                                                                           | 3.867531739  | 1.196350619  | -0.137420038 | 2.534247085  |
| ENSRLO00000012424  | wt1           | Wilms' tumor suppressor 1 [Source:NCBI;gene:Acc:100893288]                                                                  | 3.388604054  | 2.008942609  | -0.813554472 | 0.566591999  |
| ENSRLO00000015724  | ifit0         | interferon k10 [Source:ZFIN;Acc:ZDB-GENE-051111-11]                                                                         | 15.6646931   | 11.68304285  | -0.101784198 | 3.88033127   |
| ENSRLO00000016391  | zgc153031     | zgc153031 [Source:ZFIN;Acc:ZDB-GENE-060929-1190]                                                                            | 3.296239654  | 0.427956603  | -1.784271805 | 1.084546277  |
| ENSRLO000000006750 | unc5a         | unc-5 netrin receptor A [Source:ZFIN;Acc:ZDB-GENE-080219-19]                                                                | 4.284611919  | -0.580364298 | -0.815450508 | 4.050013504  |
| ENSRLO00000013713  | kfl1          | Kruppel-like factor 1 (erythroid) [Source:ZFIN;Acc:ZDB-GENE-880526-55]                                                      | 15.97609441  | 8.822092774  | -0.568698177 | 2.097565516  |
| ENSRLO00000014351  | cpk3b         | complement-3 [Source:NCBI;gene:Acc:101167694]                                                                               | 15.8784912   | 13.75439483  | -15.67844389 | -13.75441884 |
| ENSRLO00000009716  | TC2N          | tandem C2 domains, nuclear [Source:HGNC;Symbol:Acc:HGNC:19859]                                                              | 5.13877268   | 0.947970851  | -2.293887921 | 1.897399642  |
| ENSRLO00000006633  | tfap2a        | transcription factor AP-2 alpha [Source:ZFIN;Acc:ZDB-GENE-011212-6]                                                         | 4.706341633  | -0.946754881 | -2.598634006 | 3.054945509  |
| ENSRLO00000012066  | sox13         | SRY (sex determining region Y)-box 13 [Source:ZFIN;Acc:ZDB-GENE-100519-11]                                                  | 5.00707375   | 1.076975166  | -1.366176656 | 2.564411145  |
| ENSRLO00000003886  | ldlrb         | low density lipoprotein receptor b [Source:ZFIN;Acc:ZDB-GENE-040476-1254]                                                   | 5.853679414  | 2.102363212  | -1.199253951 | 2.552547415  |
| ENSRLO00000008387  | tcf7l2        | transcription factor 7 like 2 [Source:ZFIN;Acc:ZDB-GENE-991110-8]                                                           | 3.081011909  | 0.886394894  | -0.191387575 | 2.003714341  |
| ENSRLO00000010082  | arhgef40      | Rho guanine nucleotide exchange factor (GEF) 40 [Source:ZFIN;Acc:ZDB-GENE-110623-2]                                         | 3.259827005  | 1.464423913  | -1.459680523 | 0.33627078   |
| ENSRLO00000002376  | -             | -                                                                                                                           | 3.16732109   | -12.69091028 | -3.024501964 | 12.83424388  |
| ENSRLO00000015484  | -             | -                                                                                                                           | 6.595660236  | -9.696045993 | -2.314960802 | 13.97725488  |
| ENSRLO00000017571  | cx29.6.11.01  | connexin 29.6 [Source:ZFIN;Acc:ZDB-GENE-040408-4]                                                                           | 18.41867988  | 12.10753644  | -2.025248871 | 2.291342852  |
| ENSRLO00000004651  | icpr          | integrin, beta 6 [Source:ZFIN;Acc:ZDB-GENE-100812-2]                                                                        | 4.2111761    | 1.817096389  | -1.131839453 | 1.21779595   |
| ENSRLO00000002527  | nectin1b      | nectin cell adhesion molecule 1b [Source:ZFIN;Acc:ZDB-GENE-080224-2]                                                        | 5.519172402  | 2.114556188  | -1.169266719 | 2.25833162   |
| ENSRLO00000004864  | kcm6a1        | kyanin G0-specific demethylase 6A, like [Source:ZFIN;Acc:ZDB-GENE-070112-2002]                                              | 4.604260181  | 1.687897852  | -0.69576419  | 2.221082636  |
| ENSRLO00000006558  | fam78ab       | family with sequence similarity 78, member AB [Source:ZFIN;Acc:ZDB-GENE-080220-25]                                          | 4.626430079  | 1.490814975  | -2.924503828 | 0.21159784   |
| ENSRLO00000006158  | tfap2c        | transcription factor AP-2 gamma (activating enhancer binding protein 2 gamma) [Source:ZFIN;Acc:ZDB-GENE-041212-61]          | 3.405373925  | -0.011718694 | -1.453782196 | 1.963797504  |
| ENSRLO00000016159  | tcma          | transcriptional and immune response regulator a [Source:ZFIN;Acc:ZDB-GENE-050320-36]                                        | 6.122102923  | 2.206140499  | -1.927976785 | 1.988470295  |
| ENSRLO00000008678  | rgmb          | repulsive guidance molecule BMP co-receptor b [Source:ZFIN;Acc:ZDB-GENE-040527-2]                                           | 3.182512935  | 1.209097304  | 0.327888065  | 3.001768356  |
| ENSRLO000000021517 | RFO0190       | small nucleolar RNA SNORA16B/SNORA16A family [Source:NCBI;gene:Acc:111948266]                                               | 3.972871705  | 3.131112837  | 0.862285692  | 1.704532694  |

|  |                     |               |                                                                                                                       |             |              |              |              |
|--|---------------------|---------------|-----------------------------------------------------------------------------------------------------------------------|-------------|--------------|--------------|--------------|
|  | ENSORLG00000015018  | adgre5b.3     | adhesion G protein-coupled receptor E5b, duplicate 3 [Source:ZFIN;Acc:ZDB-GENE-121214-275]                            | 4.570639617 | 0.799120706  | -2.749473618 | 1.022529762  |
|  | ENSORLG00000004433  | sax2a         | SK homeobox 2 [Source:NCBI;gene:Acc:101161260]                                                                        | 4.065318586 | -1.203215336 | -2.787770357 | 2.471249641  |
|  | ENSORLG00000001848  | -             | four and a half LIM domains protein 2-like [Source:NCBI;gene:Acc:101174895]                                           | 15.85340191 | 12.40712168  | -2.766180945 | 6.680567516  |
|  | ENSORLG00000012122  | -             | -                                                                                                                     | 3.357537102 | -0.478355217 | -0.935667507 | 2.900709846  |
|  | ENSORLG000000011935 | bcar3         | BCAR3, NSP family adaptor protein [Source:ZFIN;Acc:ZDB-GENE-080513_4]                                                 | 4.143683494 | 1.721264951  | -0.982757821 | 1.440146191  |
|  | ENSORLG000000016242 | HMBOX1        | homeobox containing 1 [Source:HGNC;Symbol:Acc:HGNC:28137]                                                             | 3.066091825 | 0.667940129  | -0.928263083 | 1.470373754  |
|  | ENSORLG000000015287 | adgrg1        | adhesion G protein-coupled receptor G1 [Source:ZFIN;Acc:ZDB-GENE-030131_3671]                                         | 5.048999299 | 1.06277812   | -1.827196465 | 2.159509694  |
|  | ENSORLG00000004204  | tzd2          | frizzled class receptor 2 [Source:ZFIN;Acc:ZDB-GENE-990415_224]                                                       | 5.408865541 | 2.718099423  | -0.292427185 | 2.399058819  |
|  | ENSORLG00000002956  | infap8i3      | tumor necrosis factor, alpha-induced protein 8-like 3 [Source:ZFIN;Acc:ZDB-GENE-040426_1313]                          | 4.493730894 | 1.416954037  | -2.085632159 | 0.991629899  |
|  | ENSORLG000000011143 | ktga9         | integrin, alpha 9 [Source:ZFIN;Acc:ZDB-GENE-040426_1129]                                                              | 4.281112267 | 2.902353009  | -1.335108111 | 0.044135609  |
|  | ENSORLG00000002200  | prelid1b      | PREL1 domain-containing protein 1, mitochondrial-like [Source:NCBI;gene:Acc:101156360]                                | 3.890521639 | 1.528684716  | -0.828193734 | 1.534128321  |
|  | ENSORLG000000011552 | lts2b         | leucine zipper tumor suppressor 2 [Source:NCBI;gene:Acc:101164513]                                                    | 4.472687799 | 1.36197157   | -0.249524185 | 2.861678804  |
|  | ENSORLG000000016356 | -             | -                                                                                                                     | 7.588055086 | 0.264367883  | -7.023211339 | 0.280960771  |
|  | ENSORLG00000009243  | flj188.39     | flj188.39 [Source:ZFIN;Acc:ZDB-GENE-030131_8104]                                                                      | 4.238588807 | -0.257050745 | -1.25098852  | 3.243080796  |
|  | ENSORLG00000005778  | zbtb7c        | zinc finger and BTB domain containing 7C [Source:ZFIN;Acc:ZDB-GENE-130530_373]                                        | 4.298348966 | 1.446748849  | -0.611562126 | 2.240523383  |
|  | ENSORLG00000006274  | pnpla2        | patatin-like phospholipase domain containing 2 [Source:ZFIN;Acc:ZDB-GENE-120913_3]                                    | 3.606293633 | 0.859378643  | -1.090389126 | 1.657010996  |
|  | ENSORLG00000002955  | -             | uncharacterized LOC101172678 [Source:NCBI;gene:Acc:101172678]                                                         | 3.472982734 | 0.966232638  | -0.384797337 | 2.122437681  |
|  | ENSORLG000000010404 | atg4c         | autophagy related 4C, cysteine peptidase [Source:NCBI;gene:Acc:101155417]                                             | 3.234874247 | 0.669478805  | 0.387344162  | 2.953224513  |
|  | ENSORLG000000010105 | -             | -                                                                                                                     | 3.294831692 | 1.261812126  | -2.202008109 | -0.168503741 |
|  | ENSORLG000000006624 | zqc153704     | lipoic acid [Source:NCBI;gene:Acc:101165663]                                                                          | 3.371410898 | 0.488338044  | -0.270827356 | 2.612739487  |
|  | ENSORLG000000005847 | rtna47        | RNA binding motif protein 47 [Source:ZFIN;Acc:ZDB-GENE-030131_3812]                                                   | 5.837069111 | 1.445745871  | -1.423529452 | 2.968278731  |
|  | ENSORLG00000006206  | eyn2          | EYA transcriptional coactivator and phosphatase 2 [Source:ZFIN;Acc:ZDB-GENE-040912_24]                                | 4.442405682 | 2.36254681   | -0.339293324 | 1.741047867  |
|  | ENSORLG000000016574 | -             | -                                                                                                                     | 3.740478248 | 1.421682563  | -0.606707672 | 1.713203957  |
|  | ENSORLG00000001787  | slc35f2       | info solute carrier family 35, member F2, like [Source:ZFIN;Acc:ZDB-GENE-130530-1004]                                 | 5.14431688  | -1.075365115 | -2.481232205 | 3.738932372  |
|  | ENSORLG000000015827 | wfdc1         | WAP four-disulfide core domain 1 [Source:ZFIN;Acc:ZDB-GENE-070112_352]                                                | 6.282732906 | 4.077999011  | -2.567740186 | -0.362518982 |
|  | ENSORLG000000002466 | slc12l1-85n1  | slc12l1-85n1b.4 [Source:ZFIN;Acc:ZDB-GENE-030131_7043]                                                                | 3.404794691 | 1.721884631  | -1.056391451 | 0.627003184  |
|  | ENSORLG00000009852  | tuff1a        | tuffin 1a [Source:ZFIN;Acc:ZDB-GENE-061103-184]                                                                       | 3.370216807 | 0.620263207  | -1.49844757  | 2.551998014  |
|  | ENSORLG000000008660 | lrrc3b        | leucine rich repeat containing 3B [Source:NCBI;gene:Acc:101157953]                                                    | 3.047968067 | 0.97762434   | 0.376933039  | 2.447762012  |
|  | ENSORLG00000003816  | csf8          | cytokine inducible SH2-containing protein [Source:ZFIN;Acc:ZDB-GENE-050907_1]                                         | 3.263763348 | 0.191898822  | -2.188085497 | 0.884263869  |
|  | ENSORLG000000017279 | -             | -                                                                                                                     | 5.83269811  | -10.04328708 | -0.529418565 | 15.34707181  |
|  | ENSORLG000000017646 | adh5          | Oryza latipes alcohol dehydrogenase 5 (class III), ch polypeptide (adh5), mRNA [Source:RefSeq; mRNA:Acc:NM_001104796] | 7.012723622 | 2.119697285  | -4.166887337 | 0.726624268  |
|  | ENSORLG00000006884  | rhoub         | rho-related GTP-binding protein RhoD [Source:NCBI;gene:Acc:101159601]                                                 | 5.976790726 | 1.440514612  | -1.77015053  | 2.766610691  |
|  | ENSORLG00000005978  | spock3        | proteoglycan 3 [Source:ZFIN;Acc:ZDB-GENE-090311-]                                                                     | 4.595221344 | 2.155562858  | -2.006035503 | 0.434110177  |
|  | ENSORLG00000002084  | prs35         | protease, serine, 35 [Source:ZFIN;Acc:ZDB-GENE-040704-55]                                                             | 4.465405264 | 0.59120549   | -3.250757889 | 0.623921717  |
|  | ENSORLG000000008248 | coro7         | mitochondrial import inner membrane translocase subunit TIM16 [Source:NCBI;gene:Acc:101155031]                        | 3.216452622 | 0.670427544  | -1.481333522 | 1.065176596  |
|  | ENSORLG000000011390 | gpr18         | G protein-coupled receptor 18 [Source:ZFIN;Acc:ZDB-GENE-070912_159]                                                   | 4.705411228 | 2.722221131  | -2.486450819 | -0.502775332 |
|  | ENSORLG000000004145 | poth1g30      | protocadherin 1, gamma 30 [Source:ZFIN;Acc:ZDB-GENE-050609_23]                                                        | 3.479618934 | 1.353401468  | -1.449514527 | 0.677188864  |
|  | ENSORLG00000003502  | slc1key-165a2 | slc1key-165a2.9 [Source:ZFIN;Acc:ZDB-GENE-141209-11]                                                                  | 5.982143895 | 3.212580671  | -2.103688878 | 0.66638919   |
|  | ENSORLG00000008568  | akr1a1a       | alcohol dehydrogenase [NAD(+)] A-like [Source:NCBI;gene:Acc:101175168]                                                | 6.117376906 | 0.701703716  | -0.860778803 | 4.555373535  |
|  | ENSORLG00000005567  | zNF462        | zinc finger protein 462 [Source:HGNC;Symbol:Acc:HGNC:21894]                                                           | 3.28689027  | 1.04510333   | -0.684060665 | 1.558211041  |
|  | ENSORLG000000014548 | -             | -                                                                                                                     | 18.34696044 | 14.50454517  | -2.779925889 | 1.062959861  |
|  | ENSORLG00000006847  | apd1b         | glycerol-3-phosphate dehydrogenase 1b [Source:ZFIN;Acc:ZDB-GENE-030131_3986]                                          | 3.820345298 | 2.759847547  | -0.071383961 | 0.989597567  |
|  | ENSORLG00000003046  | hbae5         | hemoglobin, alpha embryonic 5 [Source:ZFIN;Acc:ZDB-GENE-101028-1]                                                     | 5.703787996 | 1.022274623  | -2.733292129 | 1.949606008  |
|  | ENSORLG000000012307 | zland5a       | zinc finger AN1-type containing 5 [Source:NCBI;gene:Acc:101155116]                                                    | 3.412835782 | 1.056990304  | -0.251858479 | 2.104503201  |
|  | ENSORLG000000016164 | -             | -                                                                                                                     | 4.533368544 | -13.64884177 | -4.651719264 | 13.53100124  |
|  | ENSORLG00000006356  | snix          | spermine oxidase [Source:NCBI;gene:Acc:101164210]                                                                     | 4.20135887  | 2.085021747  | -1.05336636  | 1.1121165    |
|  | ENSORLG00000005264  | -             | -                                                                                                                     | 3.792461234 | 0.753901509  | -2.143678477 | 0.89538296   |
|  | ENSORLG000000010039 | ndrg2         | protein NDRC2 [Source:NCBI;gene:Acc:101163361]                                                                        | 4.992673846 | 2.923724478  | -2.457129313 | -0.387895137 |
|  | ENSORLG000000002123 | boka          | BOK, BCL2 family apoptosis regulator 4 [Source:ZFIN;Acc:ZDB-GENE-040801_131]                                          | 4.51575064  | 0.966031094  | -0.058117047 | 0.492087143  |
|  | ENSORLG000000016510 | zfyve9b       | zinc finger, FYVE domain containing 9b [Source:ZFIN;Acc:ZDB-GENE-110825_21]                                           | 5.009054544 | 2.781797475  | -0.423987415 | 1.80375256   |
|  | ENSORLG000000014497 | -             | -                                                                                                                     | 3.784599818 | 1.58473428   | 0.05063552   | 2.240413658  |
|  | ENSORLG000000010566 | -             | -                                                                                                                     | 3.892361867 | 2.509148212  | -3.773004011 | -2.389305131 |
|  | ENSORLG000000015418 | mmp15         | Oryza latipes matrix metalloproteinase 15 (mmp15), mRNA [Source:RefSeq; mRNA:Acc:NM_001104883]                        | 4.523460121 | 2.442627569  | -1.67547397  | 0.405570183  |
|  | ENSORLG000000017446 | ctbpd         | CCAAT enhancer binding protein delta [Source:ZFIN;Acc:ZDB-GENE-020111_4]                                              | 4.553648809 | 0.661757535  | -2.914357292 | 0.978018894  |
|  | ENSORLG00000005072  | rbp4          | retinol binding protein 4 [Source:NCBI;gene:Acc:101157473]                                                            | 5.653984309 | 1.496482426  | -2.183993131 | 1.974427969  |
|  | ENSORLG000000080804 | zpc101810     | actin-related protein 2-B [Source:NCBI;gene:Acc:101157161]                                                            | 3.4933553   | 1.681319717  | -1.448959149 | 0.363561857  |
|  | ENSORLG000000014950 | olmi3c        | olfactomedin-like 3b [Source:ZFIN;Acc:ZDB-GENE-050302-161]                                                            | 3.853169143 | 1.51851508   | -3.557849562 | -1.222709862 |
|  | ENSORLG000000013833 | -             | -                                                                                                                     | 3.709954915 | 0.862532907  | -1.41125754  | 1.436648895  |
|  | ENSORLG000000005750 | slit2         | slit homolog 2 (Drosophila) [Source:ZFIN;Acc:ZDB-GENE-010306-3]                                                       | 4.917354046 | 1.442575656  | -1.11358702  | 2.36167729   |
|  | ENSORLG000000005424 | cdh16         | cadherin 16, KSP-cadherin [Source:ZFIN;Acc:ZDB-GENE-140106-140]                                                       | 5.005252235 | -2.633212238 | -6.287975586 | 1.350960913  |
|  | ENSORLG000000010812 | efz2k         | eukaryotic elongation factor 2 kinase [Source:ZFIN;Acc:ZDB-GENE-020916-2]                                             | 3.385041159 | 1.362499616  | -0.825391603 | 1.197634894  |
|  | ENSORLG000000011780 | -             | -                                                                                                                     | 4.12895798  | 7.06459236   | -0.180351093 | 1.873491408  |
|  | ENSORLG000000013379 | -             | -                                                                                                                     | 5.151740708 | 2.228572022  | -0.898368401 | 2.025286999  |
|  | ENSORLG00000003869  | lam20a        | family with sequence similarity 20, member A [Source:ZFIN;Acc:ZDB-GENE-081022-117]                                    | 4.164265609 | 0.142912802  | -2.51575689  | 1.506080958  |
|  | ENSORLG00000005345  | slc16a9a      | solute carrier family 16, member 9a [Source:ZFIN;Acc:ZDB-GENE-040426-1364]                                            | 5.356138886 | 3.62127558   | -0.547144453 | 1.188201683  |
|  | ENSORLG000000002812 | tmem98        | transmembrane protein 98 [Source:NCBI;gene:Acc:101155691]                                                             | 3.68782273  | 1.428063506  | -2.531421028 | -0.271176881 |
|  | ENSORLG000000017603 | dec11a        | C-type lectin domain containing 11A [Source:ZFIN;Acc:ZDB-GENE-130530-861]                                             | 3.234191687 | 2.058036603  | -0.114414093 | 1.06249894   |

|  |                     |                |                                                                                                                 |             |              |              |              |
|--|---------------------|----------------|-----------------------------------------------------------------------------------------------------------------|-------------|--------------|--------------|--------------|
|  | ENSORLG00000015630  | -              | uncharacterized LOC101155763 [Source:NCBI gene:Acc:101155763]                                                   | 6.103342151 | 3.328185039  | -1.459025504 | 1.316617416  |
|  | ENSORLG00000005336  | SYTL2          | synaptotagmin like 2 [Source:HGNC Symbol:Acc:HGNC:15585]                                                        | 4.122355271 | 0.362325521  | -0.212770739 | 3.547747006  |
|  | ENSORLG00000006286  | -              | trypsin like [Source:NCBI gene:Acc:101170788]                                                                   | 5.07824888  | 2.878486929  | -2.313186111 | -0.119393954 |
|  | ENSORLG00000001868  | -              | -                                                                                                               | 3.413853961 | 2.17884091   | -1.417016913 | -0.238850071 |
|  | ENSORLG00000009075  | -              | C-X-C motif chemokine 2 [Source:NCBI gene:Acc:101168980]                                                        | 5.067820213 | 1.987717512  | -1.574152345 | 1.506435013  |
|  | ENSORLG000000011996 | ehf            | ets homologous factor [Source:ZFIN:Acc:ZDB-GENE-065312-7]                                                       | 4.922940654 | 0.813599519  | -1.506997488 | 2.602824394  |
|  | ENSORLG000000017741 | -              | -                                                                                                               | 3.168947553 | 1.004336971  | -0.480901884 | 1.684194062  |
|  | ENSORLG00000001741  | hh1b           | four and a half LIM domains 1b [Source:ZFIN:Acc:ZDB-GENE-031219-11]                                             | 3.198891418 | 1.31948378   | -1.268971582 | 0.610921476  |
|  | ENSORLG00000000072  | KIAA0895L      | KIAA0895 like [Source:HGNC Symbol:Acc:HGNC:34408]                                                               | 5.101218578 | 2.908184056  | 0.493276772  | 2.686794532  |
|  | ENSORLG000000008874 | p1vapb         | plasmalemma vesicle associated protein b [Source:ZFIN:Acc:ZDB-GENE-060816-96]                                   | 3.612772923 | 1.966822954  | -1.529648545 | 0.116787228  |
|  | ENSORLG000000005925 | MBNL1          | muscleblind like splicing regulator 1 [Source:NCBI gene:Acc:101171850]                                          | 3.732031226 | 1.77005301   | -1.770151745 | 0.192357887  |
|  | ENSORLG00000004498  | PDE3A          | phosphodiesterase 3A [Source:HGNC Symbol:Acc:HGNC:8778]                                                         | 6.582701993 | 3.392181412  | -1.029461189 | 2.161527474  |
|  | ENSORLG000000006250 | lctd12b        | potassium channel tetramerisation domain containing 12b [Source:ZFIN:Acc:ZDB-GENE-050417-104]                   | 4.574919553 | 2.6526869    | -1.74689006  | 0.1780178    |
|  | ENSORLG00000001457  | -              | -                                                                                                               | 3.117539044 | -1.382710683 | -2.830037494 | 1.67069559   |
|  | ENSORLG000000011071 | uk1b           | unc-51 like autophagy activating kinase 1 [Source:ZFIN:Acc:ZDB-GENE-071203-2]                                   | 3.142591519 | 0.66745485   | -0.10453751  | 2.371083549  |
|  | ENSORLG00000000472  | s100s          | S100 calcium binding protein 5 [Source:ZFIN:Acc:ZDB-GENE-040922-31]                                             | 4.532172644 | 0.716893675  | -0.924036776 | 2.891172363  |
|  | ENSORLG000000006618 | abcb3          | Oryzias latipes antigen peptide transporter 2-like (atcb3), mRNA [Source:RefSeq mRNA:Acc:NM_001278887]          | 4.774648547 | 1.828663771  | -1.037213822 | 1.909254883  |
|  | ENSORLG000000013025 | fox1           | hyal oxidase-like 1 [Source:ZFIN:Acc:ZDB-GENE-06503-488]                                                        | 3.23195212  | 1.702848123  | -0.392293851 | 1.137295502  |
|  | ENSORLG000000016785 | pycard         | PYD and CARD domain containing [Source:ZFIN:Acc:ZDB-GENE-000511-21]                                             | 5.299448737 | 2.529309591  | -1.32763054  | 1.442994019  |
|  | ENSORLG000000010588 | mag1a          | membrane associated guanylate kinase, WW and PDZ domain containing 1a [Source:ZFIN:Acc:ZDB-GENE-081105-13]      | 3.039529279 | 0.794379501  | -0.314098394 | 1.93153702   |
|  | ENSORLG000000003935 | ppp1r14aa      | protein phosphatase 1, regulatory (inhibitor) subunit 14aa [Source:ZFIN:Acc:ZDB-GENE-050417-413]                | 5.769744357 | 2.692745404  | -2.173335423 | 0.904147531  |
|  | ENSORLG000000002029 | -              | astacin like metallo-protease [Source:NCBI gene:Acc:100049316]                                                  | 6.864075363 | 2.227959485  | -5.444284939 | -0.80766773  |
|  | ENSORLG000000002887 | snob1 (1 of m) | snobin [Source:NCBI gene:Acc:101170044]                                                                         | 7.645589221 | 3.414551359  | -3.738703701 | 0.494820197  |
|  | ENSORLG000000018251 | -              | -                                                                                                               | 4.297020241 | 0.390654053  | -2.25715822  | 1.64992516   |
|  | ENSORLG000000005019 | slc43a2b       | large neutral amino acids transporter small subunit 4 [Source:NCBI gene:Acc:101131293]                          | 5.444736743 | 1.324467199  | -3.324295467 | 0.796458917  |
|  | ENSORLG000000012366 | stom           | stomatin [Source:ZFIN:Acc:ZDB-GENE-980526-486]                                                                  | 4.13784441  | 2.174322048  | -0.359870854 | 1.604136218  |
|  | ENSORLG000000004500 | cpm5           | phosphoglucosyltransferase 5 [Source:ZFIN:Acc:ZDB-GENE-06503-838]                                               | 4.533151848 | 1.873184961  | -1.512590158 | 1.147862059  |
|  | ENSORLG000000002882 | slc12a1        | solute carrier family 12 (sodium/potassium/chloride transporter), member 1 [Source:ZFIN:Acc:ZDB-GENE-080130-31] | 4.923709544 | -7.438820311 | -4.428561328 | 7.936477616  |
|  | ENSORLG000000009017 | ENPP7          | ectonucleotide pyrophosphatase/phosphodiesterase family member 7 [Source:NCBI gene:Acc:101173488]               | 7.693288325 | -1.329668306 | -4.847301523 | 4.176136128  |
|  | ENSORLG000000016750 | slch73-21k16.5 | slch73-21k16.5 [Source:ZFIN:Acc:ZDB-GENE-030131-8374]                                                           | 3.511907667 | 0.920589491  | 0.066446466  | 2.653767984  |
|  | ENSORLG000000001847 | coro2ba        | coronin 2B [Source:NCBI gene:Acc:101167857]                                                                     | 3.824748954 | 2.544391415  | 0.771307489  | 2.052147926  |
|  | ENSORLG000000008993 | qtz2bb         | protein tyrosine kinase 2 beta, b [Source:ZFIN:Acc:ZDB-GENE-020607-1]                                           | 5.181390032 | 1.603885143  | -1.932938078 | 1.645051834  |
|  | ENSORLG000000001768 | -              | -                                                                                                               | 6.630526034 | 1.734563153  | -1.641200434 | 3.25231724   |
|  | ENSORLG000000002336 | tgfb2l         | transforming growth factor, beta 2, like [Source:ZFIN:Acc:ZDB-GENE-130425-2]                                    | 6.607878217 | 3.027119631  | -1.371435505 | 2.209813454  |
|  | ENSORLG000000013450 | foxo3          | Oryzias latipes forkhead box O3 (foxo3), mRNA [Source:RefSeq mRNA:Acc:NM_001160465]                             | 3.878185765 | 1.719345552  | -1.963988721 | 0.195356635  |
|  | ENSORLG000000008849 | waf3b          | WAF protein family, member 3b [Source:ZFIN:Acc:ZDB-GENE-070132-1512]                                            | 3.706424284 | 1.825344558  | 0.379145071  | 2.261310274  |
|  | ENSORLG000000006686 | cyp24a1        | cytochrome P450, family 24, subfamily A, polypeptide 1 [Source:ZFIN:Acc:ZDB-GENE-060825-1]                      | 3.358308331 | 1.401657138  | -2.116289762 | -0.159151466 |
|  | ENSORLG00000007988  | cpe            | carboxypeptidase E [Source:ZFIN:Acc:ZDB-GENE-090313-68]                                                         | 4.844299229 | 1.623737065  | -2.289751318 | 0.931294348  |
|  | ENSORLG00000000881  | acta1          | Oryzias latipes actin, alpha 1, skeletal muscle (acta1), mRNA [Source:RefSeq mRNA:Acc:NM_001104806]             | 5.927846049 | -0.472017521 | -6.687832166 | -0.287483837 |
|  | ENSORLG000000014469 | -              | -                                                                                                               | 4.053764278 | 1.863311968  | -0.238038448 | 1.95289908   |
|  | ENSORLG000000005839 | hspa12b        | heat shock protein 12B [Source:ZFIN:Acc:ZDB-GENE-070226-1]                                                      | 3.420061084 | 1.868953732  | -2.043735348 | -0.492143102 |
|  | ENSORLG00000000783  | col27a1b       | collagen type XXVII, alpha 1b [Source:ZFIN:Acc:ZDB-GENE-100119-2]                                               | 3.529389171 | 1.285407052  | -1.390000986 | 0.854464895  |
|  | ENSORLG000000016380 | hnf4a          | hepatocyte nuclear factor 4, alpha [Source:ZFIN:Acc:ZDB-GENE-030131-1077]                                       | 4.12508924  | -1.072393248 | -2.538709615 | 2.659256834  |
|  | ENSORLG000000001940 | kdrl           | kinase insert domain receptor like [Source:ZFIN:Acc:ZDB-GENE-000705-1]                                          | 5.212538862 | 2.659379731  | -2.51404854  | 0.039597895  |
|  | ENSORLG000000017125 | depa           | desmoplakin [Source:NCBI gene:Acc:101185763]                                                                    | 3.011343555 | 1.784934991  | -0.272695687 | 1.004198188  |
|  | ENSORLG000000009758 | tnem173        | transmembrane protein 173 [Source:ZFIN:Acc:ZDB-GENE-120921-1]                                                   | 3.083920659 | 1.072227199  | -2.420324146 | -0.408145039 |
|  | ENSORLG000000008504 | inf1l103       | tumor necrosis factor (ligand) superfamily, member 10 like 3 [Source:ZFIN:Acc:ZDB-GENE-070908-1]                | 4.327372937 | 1.287629612  | -0.162202039 | 2.878025745  |
|  | ENSORLG000000017407 | foxa2          | Oryzias latipes Me-HNF3b protein (foxa2), mRNA [Source:RefSeq mRNA:Acc:NM_001104692]                            | 6.581337347 | 0.555006044  | -3.467806299 | 2.55906202   |
|  | ENSORLG000000005897 | dkc1b          | docking protein 1b [Source:ZFIN:Acc:ZDB-GENE-040426-20631]                                                      | 4.545913678 | 1.732577218  | -1.229216131 | 1.593606764  |
|  | ENSORLG000000014515 | -              | -                                                                                                               | 4.093732431 | 1.503559666  | -0.932807675 | 1.657849914  |
|  | ENSORLG000000008870 | anka11         | annexin A11 [Source:NCBI gene:Acc:100049456]                                                                    | 4.229902906 | 1.825711191  | -0.610568155 | 1.794108604  |
|  | ENSORLG000000013881 | foxl1          | forkhead box L1 [Source:ZFIN:Acc:ZDB-GENE-040426-1181]                                                          | 6.247669972 | 0.438893388  | -3.352793304 | 2.456471901  |
|  | ENSORLG000000003956 | smad9          | SMAD family member 9 [Source:ZFIN:Acc:ZDB-GENE-031014-11]                                                       | 3.073149788 | 0.267152494  | -1.008451423 | 1.798030386  |
|  | ENSORLG000000017858 | -              | -                                                                                                               | 3.286767688 | 0.167592592  | -2.667091986 | 0.452562207  |
|  | ENSORLG000000003538 | -              | -                                                                                                               | 4.541647291 | 1.608993023  | -3.526953999 | -0.359754999 |
|  | ENSORLG000000010269 | tnem88a        | transmembrane protein 88 [Source:NCBI gene:Acc:101159459]                                                       | 4.709375791 | 1.996282353  | -2.371180608 | 0.342397901  |
|  | ENSORLG000000004966 | ADAMT5         | ADAM metalloproteinase with thrombospondin type 1 motif 5 [Source:HGNC Symbol:Acc:HGNC:2211]                    | 3.099857369 | 2.341918916  | -2.048055951 | -1.289633266 |
|  | ENSORLG000000005788 | VAV3           | vav guanine nucleotide exchange factor 3 [Source:HGNC Symbol:Acc:HGNC:12659]                                    | 4.110978885 | 0.572665321  | -0.692669023 | 2.846131286  |
|  | ENSORLG000000013277 | tgfr2          | fibroblast growth factor receptor 2 [Source:ZFIN:Acc:ZDB-GENE-030323-1]                                         | 3.746678564 | 1.660036435  | -2.0960600   | -0.0089338   |
|  | ENSORLG000000003949 | skb            | v-Ski avian sarcoma viral oncogene homolog b [Source:ZFIN:Acc:ZDB-GENE-090715-10]                               | 4.053875151 | 1.140676757  | -1.997598383 | 0.916174417  |
|  | ENSORLG000000015508 | HAND1          | heart and neural crest derivatives expressed 1 [Source:HGNC Symbol:Acc:HGNC:4807]                               | 7.582275021 | 1.707664977  | -4.165770149 | 1.709320815  |
|  | ENSORLG000000009785 | sr1key-15102   | -                                                                                                               | 3.844381544 | 1.791787227  | -0.547774311 | 1.505304981  |
|  | ENSORLG000000016245 | -              | -                                                                                                               | 4.61852206  | 2.371342159  | -0.523444845 | 1.7242035    |
|  | ENSORLG000000016848 | -              | -                                                                                                               | 4.851985565 | 0.279102756  | -3.309179482 | 1.264188403  |
|  | ENSORLG000000010315 | tpar4          | tyrosophosphatidic acid receptor 4 [Source:ZFIN:Acc:ZDB-GENE-120201-1]                                          | 3.130622088 | 1.452022582  | -1.747312841 | -0.068229606 |
|  | ENSORLG000000017235 | slch211-234h.7 | slch211-234h.7 [Source:ZFIN:Acc:ZDB-GENE-061009-16]                                                             | 3.586371054 | -1.341567501 | -1.273555287 | 0.364870223  |

|                     |                |                                                                                                   |             |              |              |              |
|---------------------|----------------|---------------------------------------------------------------------------------------------------|-------------|--------------|--------------|--------------|
| ENSORLG00000017851  | gpr143         | G protein-coupled receptor 143 [Source:ZFIN,Acc:ZDB-GENE-040426-1476]                             | 3.873329835 | 0.591496324  | -0.956412626 | 2.325905734  |
| ENSORLG00000017849  | ASB9           | ankyrin repeat and SOCS box containing 9 [Source:HGNC Symbol,Acc:HGNC:17184]                      | 17.05404081 | 11.21400334  | -3.461396282 | 2.379109007  |
| ENSORLG00000004591  | ndrip2         | Nesf4 family interacting protein 2 [Source:ZFIN,Acc:ZDB-GENE-040426-2662]                         | 4.103084166 | 1.151113393  | -0.239565621 | 2.712901346  |
| ENSORLG00000006983  | hbeqf8         | heparin-binding EGF-like growth factor A [Source:ZFIN,Acc:ZDB-GENE-080204-119]                    | 3.129560208 | 2.134782058  | 0.467854337  | 1.463063085  |
| ENSORLG00000013840  | si.ch211-1a19  | consulin [Source:NCBI gene,Acc:101170010]                                                         | 5.07601771  | 2.838458005  | -0.644488354 | 1.543678754  |
| ENSORLG00000010146  | edtic1         | ectostein-1c [Source:NCBI gene,Acc:101189374]                                                     | 4.025150541 | 1.803809992  | -0.9450123   | 1.274793374  |
| ENSORLG00000008809  | anxa4          | Oryzias latipes annexin A4 (anxa4), mRNA [Source:RefSeq mRNA,Acc:NM_00104824]                     | 4.175848293 | 1.373928923  | -0.229704098 | 2.572700166  |
| ENSORLG00000016533  | -              | -                                                                                                 | 6.228068823 | 3.766637171  | -2.896911422 | -0.436993573 |
| ENSORLG00000006703  | irf3           | interferon regulatory factor 3 [Source:ZFIN,Acc:ZDB-GENE-071120-7]                                | 4.862285038 | 1.761318364  | -1.192592724 | 1.908860348  |
| ENSORLG00000013754  | -              | -                                                                                                 | 15.68443168 | 12.88815342  | -2.1767173   | 0.620027631  |
| ENSORLG00000013171  | LPIN2 (1 of 2) | lipin 2 [Source:HGNC Symbol,Acc:HGNC:14450]                                                       | 4.809176033 | 1.74046019   | -1.874749715 | 1.230307262  |
| ENSORLG00000015032  | cebpb          | CCAAT/enhancer-binding protein beta [Source:NCBI gene,Acc:101135601]                              | 5.232046071 | 1.018395264  | -3.380420204 | 0.833705597  |
| ENSORLG00000013738  | -              | -                                                                                                 | 6.337899116 | 3.470281704  | -2.283467392 | 0.584630172  |
| ENSORLG00000014408  | cpz            | carboxypeptidase Z [Source:ZFIN,Acc:ZDB-GENE-09033-267]                                           | 4.476673972 | 1.115059134  | -2.09531591  | 1.266727993  |
| ENSORLG00000005883  | si.ch73-1609   | si.ch73-1609.1 [Source:ZFIN,Acc:ZDB-GENE-141212-254]                                              | 5.10918839  | 2.66778111   | -1.902447004 | 0.539441634  |
| ENSORLG00000006489  | zbtb32         | zinc finger and BTB domain containing 32 [Source:ZFIN,Acc:ZDB-GENE-131121-166]                    | 4.385899191 | 2.079185954  | -1.859866046 | 0.447336328  |
| ENSORLG00000010176  | ap3a3          | aquaporin-3 [Source:NCBI gene,Acc:101163089]                                                      | 4.258821838 | 2.02369902   | -1.461336299 | 0.771270648  |
| ENSORLG00000017404  | -              | -                                                                                                 | 5.15902212  | 0.915845692  | -2.113267408 | 2.130294176  |
| ENSORLG00000000128  | SLC5A9         | solute carrier family 5 member 9 [Source:HGNC Symbol,Acc:HGNC:22146]                              | 4.854237171 | 0.276457814  | -3.112823935 | 1.465432229  |
| ENSORLG00000010062  | mef2zb         | myocyte enhancer factor 2cb [Source:ZFIN,Acc:ZDB-GENE-040903-7]                                   | 3.768594967 | 2.161966814  | -0.264395254 | 1.342718517  |
| ENSORLG000000008926 | antir1b        | anthrax toxin receptor 1b [Source:ZFIN,Acc:ZDB-GENE-091204-21]                                    | 3.425506804 | 0.269340878  | -4.037231018 | -0.98058035  |
| ENSORLG00000013146  | lrrc17         | leucine rich repeat containing 17 [Source:ZFIN,Acc:ZDB-GENE-030131-9774]                          | 3.935430061 | 1.65953643   | -0.454197267 | 1.822180985  |
| ENSORLG000000050210 | gb             | hemoglobin embryonic subunit alpha-like [Source:NCBI gene,Acc:101174505]                          | 6.637479633 | 0.700020365  | -3.522005273 | 2.415938999  |
| ENSORLG00000016206  | mra6b          | matrix-remodeling associated 5b [Source:ZFIN,Acc:ZDB-GENE-081104-119]                             | 3.754660707 | 0.812539722  | -0.981172395 | 1.960883026  |
| ENSORLG00000006889  | ntrn5          | netrin 5 [Source:ZFIN,Acc:ZDB-GENE-130530-533]                                                    | 4.055169837 | -0.782957633 | -3.509598346 | 1.332027688  |
| ENSORLG00000000965  | cpz2           | carboxypeptidase Z2 [Source:NCBI gene,Acc:101193188]                                              | 4.843267598 | 1.701167593  | -4.121173004 | -0.978784311 |
| ENSORLG00000004769  | perp           | PERP, TP53 apoptosis effector [Source:NCBI gene,Acc:101162224]                                    | 4.256952546 | 1.374318729  | -1.129372356 | 1.753746472  |
| ENSORLG00000009068  | arpc1b         | actin related protein 2/3 complex, subunit 1b [Source:ZFIN,Acc:ZDB-GENE-030131-7414]              | 4.943312734 | 2.733611327  | -1.65167949  | 0.558506886  |
| ENSORLG00000010461  | hfc            | transcription factor EC [Source:NCBI gene,Acc:101167503]                                          | 3.266460849 | 0.509702697  | -2.703389938 | 0.053874593  |
| ENSORLG00000017386  | -              | -                                                                                                 | 3.927372832 | 0.396452968  | -2.448333799 | 1.083070772  |
| ENSORLG000000062938 | mat2ab         | methionine adenosyltransferase II, alpha b [Source:ZFIN,Acc:ZDB-GENE-050327-61]                   | 3.020622658 | 1.878268271  | 0.351648863  | 1.494488169  |
| ENSORLG00000011256  | ca4a           | carbonic anhydrase IV a [Source:ZFIN,Acc:ZDB-GENE-080204-85]                                      | 6.967139652 | 1.014603219  | -6.493204638 | -0.540129242 |
| ENSORLG00000011492  | ca8            | carbonic dehydratase VIII [Source:ZFIN,Acc:ZDB-GENE-001030-3]                                     | 3.672979382 | 1.294458719  | -1.102568038 | 1.276444708  |
| ENSORLG00000010725  | ca2            | carbonic dehydratase II [Source:NCBI gene,Acc:101193188]                                          | 6.888393071 | 1.031327335  | -3.449379079 | 2.211298885  |
| ENSORLG00000015375  | slpr5a         | sphingosine-1-phosphate receptor 5a [Source:ZFIN,Acc:ZDB-GENE-041114-188]                         | 3.124550957 | 2.088216831  | -1.466307149 | -0.429538295 |
| ENSORLG00000010118  | -              | -                                                                                                 | 3.997589044 | 1.955803261  | -1.986841938 | 0.065648214  |
| ENSORLG00000008319  | aldh1a2        | aldehyde dehydrogenase 1 family, member A2 [Source:ZFIN,Acc:ZDB-GENE-011010-3]                    | 5.067048294 | 2.01630605   | -1.562017530 | 1.489154634  |
| ENSORLG00000006756  | tmem56a        | transmembrane protein 56a [Source:ZFIN,Acc:ZDB-GENE-094012-1]                                     | 4.504708678 | 1.163583809  | -1.430847066 | 1.910762416  |
| ENSORLG00000012284  | fhag           | Rh associated glycoprotein [Source:ZFIN,Acc:ZDB-GENE-030131-8229]                                 | 5.622492143 | -0.270062113 | -3.930590172 | 1.962448586  |
| ENSORLG00000006989  | CCAR           | cholesterol kinase A receptor [Source:HGNC Symbol,Acc:HGNC:1570]                                  | 7.262951458 | 2.796792571  | -2.614253649 | 1.852396796  |
| ENSORLG00000018138  | tmem206        | transmembrane protein 206 [Source:NCBI gene,Acc:101157902]                                        | 4.006231721 | 1.832545402  | -0.524796094 | 1.649375554  |
| ENSORLG00000010199  | -              | -                                                                                                 | 3.603453364 | 1.841464189  | -0.28008167  | 1.734465973  |
| ENSORLG00000014802  | si.dkey-183n2  | si.dkey-183n2.15 [Source:ZFIN,Acc:ZDB-GENE-041001-160]                                            | 6.337020533 | 1.046020807  | -2.69261359  | 2.5988701    |
| ENSORLG00000014201  | samen1a        | SAM domain, SH3 domain and nuclear localisation signals 1a [Source:ZFIN,Acc:ZDB-GENE-030131-8639] | 4.981287462 | 1.984012529  | -2.232470147 | 0.765289984  |
| ENSORLG00000016804  | tenp           | tenn binding protein [Source:NCBI gene,Acc:101157902]                                             | 3.823663271 | 0.394748929  | -1.714273381 | 1.715618367  |
| ENSORLG00000000311  | -              | -                                                                                                 | 5.915225077 | 2.419171428  | -1.25899917  | 2.224748246  |
| ENSORLG000000020808 | sgoa1          | suppressor of glucose, autophagy associated 1 [Source:ZFIN,Acc:ZDB-GENE-090313-188]               | 3.680745216 | 0.180792558  | -1.502734166 | 1.99770281   |
| ENSORLG00000013782  | frzb           | frizzled related protein [Source:ZFIN,Acc:ZDB-GENE-990715-11]                                     | 3.066600418 | 2.331430377  | -1.177273237 | -0.441618255 |
| ENSORLG00000004031  | MYOF           | myofelin [Source:HGNC Symbol,Acc:HGNC:3656]                                                       | 3.715608193 | 1.524094934  | -1.282370038 | 0.909628076  |
| ENSORLG00000008512  | hao2           | hydroxyacid oxidase 2 (long chain) [Source:ZFIN,Acc:ZDB-GENE-040426-1239]                         | 7.288125433 | 1.336203432  | -2.982338804 | 2.970085771  |
| ENSORLG00000001350  | ker5           | intermediate filament protein QN3 [Source:NCBI gene,Acc:101167707]                                | 5.052849942 | 0.055527141  | -2.567325756 | 2.43048181   |
| ENSORLG00000015858  | mhm1           | muscleblind-like splicing regulator 1 [Source:ZFIN,Acc:ZDB-GENE-060929-704]                       | 3.896112438 | 1.443381687  | -1.722568228 | 0.732647339  |
| ENSORLG00000014634  | et8aa1         | 5T8 alpha-N-acetyl-neuraminidase alpha-2B-sialyltransferase 1 [Source:ZFIN,Acc:ZDB-GENE-051005-1] | 3.252700713 | 1.552043154  | -1.221824493 | 0.479319562  |
| ENSORLG00000016551  | zpc158846      | zpc158846 [Source:ZFIN,Acc:ZDB-GENE-070209-50]                                                    | 4.459724259 | -0.364777084 | -2.587248984 | 2.237738169  |
| ENSORLG00000017369  | -              | -                                                                                                 | 4.527617215 | 2.38894653   | 0.5647763    | 2.198648657  |
| ENSORLG00000017036  | -              | -                                                                                                 | 7.13747335  | 0.346745587  | -5.547586123 | 1.243628743  |
| ENSORLG00000016665  | ofml2ba        | olfactomedin like 2Ba [Source:ZFIN,Acc:ZDB-GENE-041014-329]                                       | 5.660088781 | 1.238954915  | -1.642153884 | 2.779469091  |
| ENSORLG00000003275  | -              | -                                                                                                 | 3.520694774 | 0.505426434  | -0.09198988  | 2.923762257  |
| ENSORLG00000015087  | si.dkey-109a1  | uncharacterized LOC101172797 [Source:NCBI gene,Acc:101172797]                                     | 3.515183331 | 0.6892272    | -1.491658411 | 1.334782475  |
| ENSORLG00000013086  | scube3         | signal peptide, CUB domain, EGF-like 3 [Source:ZFIN,Acc:ZDB-GENE-060717-1]                        | 3.590501376 | 1.428395941  | -2.231078523 | -0.066488077 |
| ENSORLG00000006317  | -              | -                                                                                                 | 6.420429115 | 3.11018277   | -0.616331361 | 2.694402252  |
| ENSORLG000000002372 | si.ch211-93g2  | putative methyltransferase DDB_G0268948 [Source:NCBI gene,Acc:101159172]                          | 4.654053188 | -0.057097945 | -4.011667085 | 0.694968369  |
| ENSORLG00000000985  | sloc2a1        | solute carrier organic anion transporter family, member 2A1 [Source:ZFIN,Acc:ZDB-GENE-060606-3]   | 3.869148834 | 1.739782387  | -3.042213249 | -0.912359547 |
| ENSORLG00000002431  | -              | -                                                                                                 | 7.237331334 | 2.81464365   | -3.036516299 | 1.386632423  |
| ENSORLG00000017261  | ALPK1          | alpha kinase 1 [Source:HGNC Symbol,Acc:HGNC:20917]                                                | 4.308323865 | 1.618198537  | -1.419315444 | 1.271614448  |
| ENSORLG00000008976  | esrp1          | epithelial splicing regulatory protein 1 [Source:ZFIN,Acc:ZDB-GENE-070112-1732]                   | 3.388034523 | -0.025852932 | -1.428944762 | 1.985428414  |
| ENSORLG000000003862 | fn1b           | fibrinectin 1b [Source:ZFIN,Acc:ZDB-GENE-030131-6543]                                             | 4.865386579 | 0.413072311  | -3.893585518 | 0.559213809  |
| ENSORLG000000005829 | col5a3a        | collagen, type V, alpha 3a [Source:ZFIN,Acc:ZDB-GENE-030131-968]                                  | 4.735875385 | 2.316642635  | -0.853533886 | 1.566180547  |
| ENSORLG00000012093  | lcl            | four pointed box 1 [Source:NCBI gene,Acc:101170899]                                               | 3.071348576 | 1.435994891  | -0.835822212 | 0.800016621  |
| ENSORLG000000006439 | mx4            | MAX dimerization protein 4 [Source:ZFIN,Acc:ZDB-GENE-050208-44]                                   | 5.061537794 | 2.261716314  | -0.389394067 | 2.410911379  |

|                     |                 |                                                                                                                                    |             |              |              |              |
|---------------------|-----------------|------------------------------------------------------------------------------------------------------------------------------------|-------------|--------------|--------------|--------------|
| ENSORLG00000014162  | wwa11           | von Willebrand factor A domain containing 11 [Source:ZFIN,Acc:ZDB-GENE-141211-58]                                                  | 3.91860014  | -0.28269577  | -1.994112198 | 2.207658221  |
| ENSORLG00000006426  | zpcr171592      | zpcr171592 [Source:ZFIN,Acc:ZDB-GENE-080220-23]                                                                                    | 7.708085021 | 2.388088241  | -8.058989866 | -2.739412255 |
| ENSORLG00000017121  | zhrs3b          | dehydrogenase/reductase 3 [Source:NCBI gene:Acc:101159580]                                                                         | 3.619859359 | 2.21909411   | -1.946774347 | -0.545439796 |
| ENSORLG00000016942  | zqchfr          | GTP cyclohydrolase I feedback regulator [Source:ZFIN,Acc:ZDB-GENE-040426-1731]                                                     | 5.03882981  | 2.912160681  | -1.545191041 | 0.581956738  |
| ENSORLG00000000812  | zqcr101583      | magnesium transporter NIPAZ [Source:NCBI gene:Acc:101155561]                                                                       | 3.313070875 | 2.070672086  | 0.909596384  | 2.152479609  |
| ENSORLG00000010100  | baq2            | BCL2 associated athanogene 2 [Source:NCBI gene:Acc:101155139]                                                                      | 4.024853672 | 2.681279587  | 0.349353808  | 1.693412962  |
| ENSORLG00000005621  | -               | DEF6, guanine nucleotide exchange factor [Source:NCBI gene:Acc:101162599]                                                          | 4.667573791 | 1.815645853  | -0.280007646 | 2.572405174  |
| ENSORLG00000006652  | def6a           | Ras association (RalGDS/AF-6) domain family member 2a [Source:ZFIN,Acc:ZDB-GENE-040912-124]                                        | 3.592670766 | 2.281792606  | 0.360248311  | 1.671611874  |
| ENSORLG00000002844  | rasf2a          | Ras association (RalGDS/AF-6) domain family member 2a [Source:ZFIN,Acc:ZDB-GENE-040912-124]                                        | 4.490494489 | 1.990262742  | -0.189423475 | 2.311292906  |
| ENSORLG00000002501  | -               | bile salt -activated lipase-like [Source:NCBI gene:Acc:101174676]                                                                  | 5.903923266 | 0.508623717  | -6.068582356 | -0.610799074 |
| ENSORLG00000016428  | -               | bile salt -activated lipase-like [Source:NCBI gene:Acc:101174676]                                                                  | 6.183049761 | 1.57612217   | -4.810948029 | -0.203536051 |
| ENSORLG00000006281  | ack2            | phosphoenolpyruvate carboxykinase 2, mitochondrial [Source:NCBI gene:Acc:101158145]                                                | 3.265679773 | 0.092162479  | -2.768800011 | 0.405202106  |
| ENSORLG00000007902  | hoac12a         | homeobox protein Hox-C12a [Source:NCBI gene:Acc:101170268]                                                                         | 3.866480597 | 0.075003798  | -4.468793712 | -0.676830569 |
| ENSORLG00000007495  | ERMP1           | endoplasmic reticulum metalloproteinase 1 [Source:HGNC Symbol:HGNC:23703]                                                          | 4.096468942 | 1.517729029  | -1.406617832 | 1.172606345  |
| ENSORLG00000004256  | emp1            | epithelial membrane protein 1 [Source:ZFIN,Acc:ZDB-GENE-070822-2]                                                                  | 3.549150919 | 2.020821594  | -0.941595418 | 0.587218887  |
| ENSORLG00000016624  | -               | foxd1                                                                                                                              | 5.549173265 | 3.095503028  | -1.875605084 | 0.578552027  |
| ENSORLG00000003247  | foxd1           | Oryzias latipes forkhead box D1 (foxd1), mRNA [Source:RefSeq mRNA,Acc:NM_001160452]                                                | 15.69788521 | 10.28146644  | -5.462715463 | -0.045834351 |
| ENSORLG00000004356  | si:ch211-276f   | glucose-fructose oxidoreductase domain-containing protein 1 [Source:NCBI gene:Acc:101174141]                                       | 4.107160357 | 1.606858888  | -0.966569281 | 1.534217622  |
| ENSORLG00000017006  | -               | -                                                                                                                                  | 5.34860083  | 2.417790088  | -2.548601988 | 0.382693589  |
| ENSORLG00000016373  | twis3           | Oryzias latipes twist-related protein 2-like (LOC101185973), mRNA [Source:RefSeq mRNA,Acc:NM_001309012]                            | 5.648500059 | -2.4557753   | -4.61393852  | 3.490829865  |
| ENSORLG00000011921  | -               | -                                                                                                                                  | 3.719669037 | 1.766696827  | -0.365568847 | 1.587888363  |
| ENSORLG00000010556  | ctnn2           | catenin 2 [Source:ZFIN,Acc:ZDB-GENE-390630-12]                                                                                     | 5.648665104 | 1.807491533  | -0.9293337   | 3.109303498  |
| ENSORLG00000016995  | -               | -                                                                                                                                  | 3.915101051 | 1.19595539   | -0.415917519 | 2.403911726  |
| ENSORLG00000001490  | spny4           | sprouty homolog 4 (Drosophila) [Source:ZFIN,Acc:ZDB-GENE-010603-2]                                                                 | 7.520409181 | 4.487721519  | -1.204327249 | 1.828850574  |
| ENSORLG00000016581  | esrb            | estrogen-related receptor beta [Source:ZFIN,Acc:ZDB-GENE-040616-2]                                                                 | 17.11569639 | 10.55897549  | -2.477456588 | 4.87973655   |
| ENSORLG00000014146  | ENTPD2          | ectonucleoside triphosphate diphosphohydrolase 2 [Source:HGNC Symbol:HGNC:3364]                                                    | 4.345379155 | 1.132135707  | -0.343418987 | 2.870310874  |
| ENSORLG00000015532  | pkdccb          | protein kinase domain containing, cytoplasmic b [Source:ZFIN,Acc:ZDB-GENE-130530-599]                                              | 3.799533712 | 1.841383388  | -2.412930836 | -0.454295585 |
| ENSORLG00000016908  | GREM1 (1 of 2)  | gremlin 1, DAN family BMP antagonist [Source:HGNC Symbol:HGNC:2001]                                                                | 4.058075985 | 2.026219677  | -2.767304688 | -0.734963767 |
| ENSORLG00000016585  | -               | -                                                                                                                                  | 3.548072816 | 1.923896017  | -0.537880601 | 1.086780957  |
| ENSORLG00000001278  | plekha7a        | pleckstrin homology domain containing, family A member 7a [Source:ZFIN,Acc:ZDB-GENE-050419-75]                                     | 3.806614855 | 1.177390926  | -1.198779787 | 1.430929891  |
| ENSORLG00000013479  | lrm94tb         | FERM domain containing 4B0 [Source:ZFIN,Acc:ZDB-GENE-100921-74]                                                                    | 3.226525646 | 0.737933796  | -1.499470634 | 0.989660529  |
| ENSORLG00000020213  | cldn4           | claudin 4 [Source:ZFIN,Acc:ZDB-GENE-010328-9]                                                                                      | 7.015868657 | 1.735558818  | -5.86301023  | -0.587190188 |
| ENSORLG00000020296  | FBIN1 (1 of 2)  | fibulin 1 [Source:HGNC Symbol:HGNC:3600]                                                                                           | 3.97399029  | 0.532417758  | -4.06236771  | -0.564310697 |
| ENSORLG00000004781  | tns1b           | tensin 1b [Source:ZFIN,Acc:ZDB-GENE-030131-6933]                                                                                   | 4.121745436 | 1.171167432  | -1.25068842  | 1.169974935  |
| ENSORLG00000011664  | mfp5            | microfilament-associated protein 2 [Source:NCBI gene:Acc:101167732]                                                                | 3.656705943 | 2.841362638  | -1.397249606 | -0.581376241 |
| ENSORLG00000002810  | -               | -                                                                                                                                  | 5.355331967 | 0.58335906   | -0.665490873 | 4.106966986  |
| ENSORLG00000016589  | faah            | fatty acid amide hydrolase [Source:ZFIN,Acc:ZDB-GENE-070918-3]                                                                     | 4.458460765 | 0.106321514  | -2.822313567 | 1.530310612  |
| ENSORLG00000001873  | TENT5A          | terminal nucleotidyltransferase 5A [Source:NCBI gene:Acc:101158475]                                                                | 5.106858282 | 1.593478514  | -1.096527315 | 2.417338948  |
| ENSORLG000000018182 | -               | -                                                                                                                                  | 4.315257347 | 1.342308514  | -1.267759633 | 1.705675075  |
| ENSORLG000000013889 | -               | -                                                                                                                                  | 3.537527611 | 2.122246621  | -0.995291761 | 0.420474323  |
| ENSORLG00000013582  | -               | -                                                                                                                                  | 7.49858101  | 1.546688853  | -6.370825912 | -0.418501767 |
| ENSORLG000000011550 | btbox1          | butyrobetaine (gamma)-2-oxoglutarate dioxygenase (gamma-butyrobetaine hydroxylase) 1 [Source:ZFIN,Acc:ZDB-GENE-050417-218]         | 3.95894118  | 0.473794345  | -2.133534362 | 1.352097243  |
| ENSORLG00000006259  | mmp1a           | multiple inactivator-polyphosphate phosphatase 1a [Source:ZFIN,Acc:ZDB-GENE-060929-1184]                                           | 4.601551324 | 0.036756316  | -2.800747317 | 1.764532928  |
| ENSORLG00000009808  | -               | -                                                                                                                                  | 3.146576836 | 1.589148917  | 0.021613047  | 1.579546545  |
| ENSORLG000000012182 | slc9a3r1b       | solute carrier family 9, subfamily A (NHE3, cation proton antiporter 3), member 3 regulator 1b [Source:ZFIN,Acc:ZDB-GENE-170530-6] | 4.950958284 | 1.828955966  | -1.884271731 | 1.237851401  |
| ENSORLG00000000487  | rs8b3a          | RPS8-like 3a [Source:ZFIN,Acc:ZDB-GENE-091204-460]                                                                                 | 4.30057218  | -1.093588391 | -3.29049925  | 2.104145208  |
| ENSORLG00000011646  | RASA2           | RAS p21 protein activator 2 [Source:HGNC Symbol:HGNC:8872]                                                                         | 3.957335298 | 1.945109624  | 0.447979663  | 2.460688201  |
| ENSORLG000000013413 | pip5k1ba        | phosphatidylinositol-4-phosphate 5-kinase, type 1, beta 1 [Source:ZFIN,Acc:ZDB-GENE-041010-81]                                     | 3.56756648  | 0.965348733  | -2.055052622 | 0.547649761  |
| ENSORLG000000016352 | si:dkcy-256h2   | si:dkcy-256h2.1 [Source:ZFIN,Acc:ZDB-GENE-030131-8466]                                                                             | 3.720947538 | 1.270973574  | -0.385250218 | 2.06520835   |
| ENSORLG000000010191 | nr2f1a          | nuclear receptor subfamily 2, group F, member 1a [Source:ZFIN,Acc:ZDB-GENE-380526-115]                                             | 3.127875621 | 2.437544602  | -1.69353355  | -1.002717956 |
| ENSORLG00000002303  | -               | GIMAP family P-loop NTPase domain containing 1 [Source:NCBI gene:Acc:101171283]                                                    | 16.6994368  | 10.96260686  | -3.872653777 | 1.86515079   |
| ENSORLG000000008785 | -               | -                                                                                                                                  | 5.033893979 | 3.494041892  | -0.464489286 | 1075849704   |
| ENSORLG000000010290 | cpolce          | procollagen C-endopeptidase enhancer A [Source:ZFIN,Acc:ZDB-GENE-041014-370]                                                       | 4.604069371 | 1.623797028  | -4.148510213 | -1.167752824 |
| ENSORLG00000004584  | -               | Oryzias latipes Herp 2 (LOC10049440), mRNA [Source:RefSeq mRNA,Acc:NM_001104814]                                                   | 15.9482835  | 10.85596635  | -0.532296748 | 4.567033612  |
| ENSORLG000000013935 | -               | -                                                                                                                                  | 4.126359829 | 1.750004317  | -1.105729649 | 1.271110006  |
| ENSORLG00000000944  | mf2             | ring finger protein, transmembrane 2 [Source:NCBI gene:Acc:101163823]                                                              | 3.790827296 | 1.226771136  | -0.415882515 | 2.148659736  |
| ENSORLG000000018185 | lox3b           | lysoyl oxidase-like 3b [Source:ZFIN,Acc:ZDB-GENE-030131-8240]                                                                      | 4.169735585 | 1.293556838  | -1.407128082 | 1.469536156  |
| ENSORLG00000011244  | ank1b           | ankyrin 1, erythrocytic b [Source:ZFIN,Acc:ZDB-GENE-091113-6]                                                                      | 5.531184224 | -7.573896238 | -9.015517352 | 4.090068833  |
| ENSORLG00000004681  | ARHGAP6         | Rho GTPase activating protein 6 [Source:HGNC Symbol:HGNC:876]                                                                      | 4.209268382 | 1.785237908  | -2.417337473 | 0.007177996  |
| ENSORLG000000010798 | -               | -                                                                                                                                  | 4.79617438  | -0.796882442 | -2.817601456 | 2.77993275   |
| ENSORLG000000010562 | -               | -                                                                                                                                  | 3.984543836 | 0.323846136  | -3.833988617 | -0.172786624 |
| ENSORLG000000014343 | d3              | inhibitor of DNA binding 3, HLH protein [Source:NCBI gene:Acc:101164112]                                                           | 3.976392992 | 2.26382511   | -2.65968391  | -0.946630981 |
| ENSORLG000000009810 | efna1b (1 of 2) | efrin A1 [Source:NCBI gene:Acc:101169993]                                                                                          | 5.033159163 | 1.281535299  | -1.467096682 | 2.285012117  |
| ENSORLG000000007386 | mat1a           | S-adenosylmethionine synthase [Source:NCBI gene:Acc:101160342]                                                                     | 4.670255257 | 0.710464837  | -2.816481352 | 1.143794536  |
| ENSORLG000000013755 | ctfb            | core-binding factor, beta subunit [Source:ZFIN,Acc:ZDB-GENE-360526-440]                                                            | 5.042678982 | 2.688174065  | -1.888334753 | 0.466655685  |
| ENSORLG000000003871 | -               | -                                                                                                                                  | 3.258842431 | 2.202145892  | 0.168576713  | 1.225758305  |
| ENSORLG00000002101  | AFAP11 (1 of 2) | actin filament associated protein 1 like 1 [Source:HGNC Symbol:HGNC:2674]                                                          | 3.693083617 | 2.637037366  | 1.301984095  | 2.358514691  |
| ENSORLG000000005650 | ca6             | carbonic anhydrase VI [Source:ZFIN,Acc:ZDB-GENE-030131-7091]                                                                       | 4.570691179 | 1.130642056  | -2.814951003 | 0.625582384  |
| ENSORLG000000007828 | si:ch211-137f2  | si:ch211-137f2.10 [Source:ZFIN,Acc:ZDB-GENE-060526-34]                                                                             | 4.881587993 | 2.105409658  | -0.973278691 | 1.803384571  |

|                     |                 |                                                                                                                      |             |              |              |              |
|---------------------|-----------------|----------------------------------------------------------------------------------------------------------------------|-------------|--------------|--------------|--------------|
| ENSORLG00000017598  | pkra            | protein kinase, interferon-inducible double stranded RNA dependent activator [Source:ZFIN;Acc:ZDB-GENE-050309-206]   | 6.21392501  | 3.96875078   | -1.179326341 | 1.06633531   |
| ENSORLG00000017476  | 1pr4            | sphingosine-1-phosphate receptor 4 [Source:ZFIN;Acc:ZDB-GENE-050506-8]                                               | 16.44791233 | 11.98262287  | -2.829714404 | 1.636041645  |
| ENSORLG00000017066  | slpl            | alkaline phosphatase, liver/kidney [Source:ZFIN;Acc:ZDB-GENE-040420-1]                                               | 4.213965882 | 1.999016507  | -0.682677222 | 1.532757013  |
| ENSORLG00000015714  | tagln           | transgelin [Source:NCBI;gene:Acc:101169057]                                                                          | 4.196157138 | 2.974096245  | -1.02940372  | 0.195142175  |
| ENSORLG00000008671  | st3gal5         | ST3 beta-galactoside alpha-2,3-sialyltransferase 5 [Source:ZFIN;Acc:ZDB-GENE-060522-1]                               | 3.120264914 | 1.460635413  | -0.561239442 | 1.098875167  |
| ENSORLG00000016685  | -               | -                                                                                                                    | 3.915094536 | 2.000296282  | -1.268851106 | 0.646432938  |
| ENSORLG00000007837  | nr1d4a          | nuclear receptor subfamily 1, group D, member 4a [Source:ZFIN;Acc:ZDB-GENE-080403-3]                                 | 3.805115883 | 1.370501622  | -0.289966942 | 2.145133267  |
| ENSORLG00000000416  | -               | -                                                                                                                    | 3.334449927 | 1.194754254  | 0.198780018  | 2.113688569  |
| ENSORLG00000001080  | xch             | xanthine dehydrogenase [Source:ZFIN;Acc:ZDB-GENE-070719-9]                                                           | 5.58024666  | -1.387756817 | -3.53933416  | 3.429154948  |
| ENSORLG00000006880  | ctprh           | protein tyrosine phosphatase, receptor type, h [Source:ZFIN;Acc:ZDB-GENE-091118-90]                                  | 4.09391453  | 0.186736046  | -1.919522591 | 1.988140508  |
| ENSORLG00000014439  | CEL             | bile salt-activated lipase [Source:NCBI;gene:Acc:101172670]                                                          | 6.104418832 | 1.656949649  | -4.898853562 | -0.450899506 |
| ENSORLG00000007800  | -               | -                                                                                                                    | 4.004159582 | 1.03992458   | -0.994478011 | 1.970293493  |
| ENSORLG00000003253  | gstm            | glutathione S-transferase (L-arginine:glycine amidinotransferase) [Source:ZFIN;Acc:ZDB-GENE-021015-1]                | 6.738761245 | 2.773884501  | -4.275748792 | -0.310386403 |
| ENSORLG00000002221  | -               | -                                                                                                                    | 4.40685237  | 0.497223245  | -1.149088289 | 2.761025819  |
| ENSORLG00000003797  | MPP1E1          | metallophosphoesterase 1 [Source:HGNC;Symbol:Acc:HGNC:15988]                                                         | 5.007638366 | -11.39973721 | -1.798549488 | 14.60933344  |
| ENSORLG00000016604  | si:dkey-30e9.7  | si:dkey-30e9.7 [Source:ZFIN;Acc:ZDB-GENE-131121-540]                                                                 | 3.517326638 | 1.295490351  | 0.304638663  | 2.526961252  |
| ENSORLG00000011353  | snrb            | spectrin, beta, erythrocytic [Source:ZFIN;Acc:ZDB-GENE-000906-1]                                                     | 6.115783608 | 2.384753811  | -1.413347836 | 2.318170103  |
| ENSORLG00000001820  | rsal3           | RAS protein activator like 3 [Source:ZFIN;Acc:ZDB-GENE-101130-3]                                                     | 4.286408649 | 0.665601314  | -3.150682249 | 0.470609666  |
| ENSORLG00000011535  | pcdh12          | protocadherin 12 [Source:ZFIN;Acc:ZDB-GENE-140106-128]                                                               | 4.248327786 | 2.191884264  | -1.208072835 | 0.848855477  |
| ENSORLG00000012606  | tap2t           | transporter associated with antigen processing, subunit type 1, telost specific [Source:ZFIN;Acc:ZDB-GENE-130531-48] | 3.728650359 | 1.986119911  | 0.120334803  | 1.863350309  |
| ENSORLG00000007617  | -               | -                                                                                                                    | 6.241978563 | 3.585374976  | -2.665440719 | -0.008368212 |
| ENSORLG00000015802  | tmoxd4          | tropomodulin 4 [Source:NCBI;gene:Acc:101166163]                                                                      | 3.72794587  | 0.51787778   | -3.104010978 | 0.101389848  |
| ENSORLG00000013113  | si:dkey-65d13.3 | si:dkey-65d13.3 [Source:ZFIN;Acc:ZDB-GENE-141216-308]                                                                | 5.607517829 | 2.187721585  | -2.388429035 | 1.031855245  |
| ENSORLG00000009479  | mafba           | v-maf avian musculoaponeurotic fibrosarcoma oncogene homolog Ba [Source:ZFIN;Acc:ZDB-GENE-980576-516]                | 3.703272786 | 1.164656603  | -2.42044637  | 0.118654617  |
| ENSORLG00000016537  | aldh8a1         | aldehyde dehydrogenase 8 family member A1 [Source:NCBI;gene:Acc:101173520]                                           | 5.9530506   | -0.181846478 | -3.721487203 | 2.413894887  |
| ENSORLG00000003322  | -               | -                                                                                                                    | 3.694290736 | 0.149933356  | -2.364183949 | 1.180658157  |
| ENSORLG00000014464  | -               | bile salt-activated lipase [Source:NCBI;gene:Acc:101172916]                                                          | 5.837388568 | -0.3290286   | -4.574438022 | 1.592463914  |
| ENSORLG00000000881  | -               | -                                                                                                                    | 3.516698006 | 1.335723556  | -0.771980407 | 1.409479348  |
| ENSORLG00000016793  | rgs19           | regulator of G-protein signaling 17 [Source:NCBI;gene:Acc:1011588610]                                                | 4.097104621 | 0.67683292   | -1.576647795 | 1.844108789  |
| ENSORLG00000003825  | dhx58           | DXH-box helicase 58 [Source:NCBI;gene:Acc:101162602]                                                                 | 4.379407761 | 0.939479999  | -1.915182082 | 1.525230606  |
| ENSORLG00000015920  | -               | -                                                                                                                    | 4.0527815   | 1.856724688  | -0.632521849 | 1.564207078  |
| ENSORLG0000002044   | hxf5            | HLH homeobox 5 [Source:NCBI;gene:Acc:101166400]                                                                      | 4.775563745 | 1.944058583  | -0.205297114 | 2.62669319   |
| ENSORLG00000005151  | ZBTB5           | zinc finger and BTB domain containing 5 [Source:HGNC;Symbol:Acc:HGNC:23836]                                          | 3.227560267 | 1.340122848  | -0.181665492 | 1.706256625  |
| ENSORLG00000004953  | plekha1a        | pleckstrin homology domain-containing family A member 1 [Source:NCBI;gene:Acc:101161669]                             | 3.353556362 | 1.59970243   | 0.58040543   | 2.33474464   |
| ENSORLG00000000242  | -               | -                                                                                                                    | 5.039724605 | 1.032190982  | -1.53373686  | 2.474244452  |
| ENSORLG000000003915 | ptges           | prostaglandin G synthase [Source:NCBI;gene:Acc:101162789]                                                            | 4.356265281 | 2.194472253  | -0.098832491 | 2.06345429   |
| ENSORLG00000016646  | lyco1a          | LYC and coiled-coil domain containing 1a [Source:ZFIN;Acc:ZDB-GENE-110411-276]                                       | 3.24654922  | -0.505999764 | -1.861117183 | 1.891916711  |
| ENSORLG00000001380  | sh3bp4          | SH3 domain binding protein 4 [Source:NCBI;gene:Acc:101160807]                                                        | 3.268414831 | 2.005243947  | 0.840623319  | 2.104279157  |
| ENSORLG00000012877  | alc25a25b       | calcium-binding mitochondrial carrier protein SCAMC-2-B [Source:NCBI;gene:Acc:101157381]                             | 3.640235028 | 1.470778348  | 0.060109757  | 2.230052571  |
| ENSORLG00000000098  | zbtb2b          | zinc finger E-box binding homeobox 2 [Source:NCBI;gene:Acc:101172786]                                                | 3.475486882 | 1.656039045  | -2.248507293 | -0.42857485  |
| ENSORLG000000010317 | isowaha         | soxondowah ankyrin repeat domain family member Aa [Source:ZFIN;Acc:ZDB-GENE-100910-3]                                | 3.748982655 | -0.198219178 | -1.633719519 | 2.319961619  |
| ENSORLG00000012493  | gls2a           | glutaminase 2a (liver, mitochondrial) [Source:ZFIN;Acc:ZDB-GENE-081105-57]                                           | 5.026634129 | 0.057244988  | -15.69319916 | -10.72382304 |
| ENSORLG00000004520  | hsl11b11a1      | hydroxysteroid 11-beta dehydrogenase 1 like [Source:NCBI;gene:Acc:10094905]                                          | 3.782407527 | -0.773629506 | -2.267139243 | 2.289381352  |
| ENSORLG00000012382  | adcy6a          | adenylylate cyclase 6a [Source:ZFIN;Acc:ZDB-GENE-060221-1]                                                           | 4.122411512 | 1.211290302  | -1.380753651 | 1.530852951  |
| ENSORLG00000017725  | bd10            | B cell CLL/lymphoma 10 [Source:ZFIN;Acc:ZDB-GENE-100219-2]                                                           | 4.386626053 | 0.881144534  | -2.417649513 | 1.088317512  |
| ENSORLG00000005044  | amh             | anti-Müllerian hormone [Source:ZFIN;Acc:ZDB-GENE-050706-192]                                                         | 4.805806138 | 2.351218842  | -1.066811671 | 1.388226507  |
| ENSORLG00000010779  | ghdc2           | ghen domain containing 2 [Source:ZFIN;Acc:ZDB-GENE-140106-69]                                                        | 4.27400437  | 2.016096952  | -2.072621149 | 0.185807882  |
| ENSORLG00000017717  | gdn10b          | gdnalin 10 [Source:NCBI;gene:Acc:101166512]                                                                          | 17.2190864  | 0            | -17.2190612  | 0            |
| ENSORLG00000013173  | alc20a1a        | solute carrier family 20, member 1a [Source:ZFIN;Acc:ZDB-GENE-040426-2217]                                           | 5.703802654 | 0.796387606  | -5.203026254 | -0.295109752 |
| ENSORLG00000013546  | dhx7cb          | dehydrogenase/reductase (SDR family) member 7Cb [Source:ZFIN;Acc:ZDB-GENE-050522-278]                                | 15.71664694 | 11.19295236  | -1.071570585 | 3.452590803  |
| ENSORLG00000016148  | parp12a         | poly (ADP-ribose) polymerase family, member 12a [Source:ZFIN;Acc:ZDB-GENE-050419-6]                                  | 3.007652115 | -0.080319163 | -1.758684271 | 1.329771926  |
| ENSORLG00000016875  | naga            | N-acetylgalactosaminidase, alpha [Source:ZFIN;Acc:ZDB-GENE-051113-256]                                               | 3.451162327 | 0.25635924   | -2.684800079 | 0.510487918  |
| ENSORLG00000017488  | roc2            | amine oxidase, copper containing 2 [Source:ZFIN;Acc:ZDB-GENE-050320-133]                                             | 3.485099568 | 2.102991969  | -2.611237768 | -1.228645173 |
| ENSORLG00000005491  | -               | -                                                                                                                    | 4.825183491 | 2.758348813  | 0.211252667  | 2.278572539  |
| ENSORLG00000002242  | cp17a2          | Cyp17a2-like steroid 17-alpha-hydroxylase/17,20 lyase-like (cp17a2) mRNA [Source:RefSeq; mRNA:Acc:NM_00278876]       | 5.352402955 | 2.062826538  | -0.673941641 | 2.616137713  |
| ENSORLG00000005620  | KLF6            | Kruppel like factor 6 [Source:HGNC;Symbol:Acc:HGNC:2233]                                                             | 3.752229229 | 1.091604502  | -1.81773266  | 0.843336535  |
| ENSORLG00000003404  | cavatb4         | carvalbumin beta [Source:NCBI;gene:Acc:101173896]                                                                    | 5.278239454 | -1.666534679 | -8.22676398  | -1.281004433 |
| ENSORLG00000015238  | -               | -                                                                                                                    | 3.57030767  | 1.569292988  | 0.18115419   | 2.182653658  |
| ENSORLG000000003520 | rem2b           | Fnrl1 related extracellular matrix protein 2b [Source:ZFIN;Acc:ZDB-GENE-081119-4]                                    | 4.063763967 | 2.407296854  | -0.508450745 | 1.148497995  |
| ENSORLG00000012314  | rd1a            | rho-related GTP-binding protein RhoG [Source:NCBI;gene:Acc:101157215]                                                | 3.678537651 | 0.878630013  | -0.117521654 | 2.682871569  |
| ENSORLG00000006338  | -               | -                                                                                                                    | 3.584410586 | 2.301298351  | 0.327168241  | 1.610765887  |
| ENSORLG00000006095  | nr2a            | neuronalin 2a [Source:ZFIN;Acc:ZDB-GENE-070615-10]                                                                   | 3.262995363 | 0.101194232  | -2.014186609 | 1.148166458  |
| ENSORLG00000015818  | -               | -                                                                                                                    | 3.494518831 | -0.447260617 | -2.128953474 | 1.813310859  |
| ENSORLG00000012173  | pk2a            | pyruvate dehydrogenase kinase, isozyme 2a [Source:ZFIN;Acc:ZDB-GENE-120910-1]                                        | 3.261192995 | 1.090575905  | -0.965517164 | 1.205585321  |
| ENSORLG00000016446  | -               | -                                                                                                                    | 4.216130222 | 2.374397472  | -2.701410946 | -0.859192138 |

|  |                    |                |                                                                                                                        |             |              |              |              |
|--|--------------------|----------------|------------------------------------------------------------------------------------------------------------------------|-------------|--------------|--------------|--------------|
|  | ENSORLG00000011270 | nr1h4          | nuclear receptor subfamily 1 group H member 4<br>[Source:NCBI geneAcc:101166124]                                       | 3.95304312  | -0.989108477 | -1.958875822 | 2.983721912  |
|  | ENSORLG00000015784 | canrk2n1a      | calcium/calmodulin dependent protein kinase II inhibitor 2 [Source:NCBI geneAcc:101167903]                             | 4.134709315 | 0.856523722  | -1.060573349 | 2.218098001  |
|  | ENSORLG00000009970 | CCDC177        | coiled-coil domain containing 177 [Source:HGNC Symbol;Acc:HGNC:23243]                                                  | 3.013512082 | 0.428332107  | -1.385513438 | 1.200160961  |
|  | ENSORLG00000014976 | -              | -                                                                                                                      | 5.043437161 | 0.762955855  | -2.842807029 | 1.437686225  |
|  | ENSORLG00000005451 | egr1           | early growth response 1 [Source:ZFIN;Acc:ZDB-GENE-980526-320]                                                          | 5.305593447 | 1.43579804   | -1.429394737 | 2.440895565  |
|  | ENSORLG00000002566 | scl3a2         | solute carrier family 13 (sodium-dependent dicarboxylate transporter), member 2 [Source:ZFIN;Acc:ZDB-GENE-040426-2389] | 5.210747859 | -0.283065823 | -3.686251691 | 1.8004497    |
|  | ENSORLG00000016602 | -              | -                                                                                                                      | 3.599681454 | 0.915157508  | -2.600887915 | 0.084119462  |
|  | ENSORLG00000009627 | ntf5c2l1       | 5'-nucleotidase, cytosolic II, like 1 [Source:ZFIN;Acc:ZDB-GENE-031006-8]                                              | 7.145605655 | 1.993365001  | -0.831042188 | 4.321690125  |
|  | ENSORLG00000015940 | h1b            | H1-1 proto-oncogene, ETS transcription factor b [Source:ZFIN;Acc:ZDB-GENE-031114-3]                                    | 5.049464749 | 1.999796795  | -2.633591939 | 0.416561568  |
|  | ENSORLG00000013704 | ncoa3          | nuclear receptor coactivator 3 [Source:ZFIN;Acc:ZDB-GENE-051107-8]                                                     | 3.493188434 | 1.47526823   | -0.13557476  | 1.882830321  |
|  | ENSORLG00000017833 | -              | -                                                                                                                      | 5.958987794 | 1.558075464  | -1.487328745 | 2.914069501  |
|  | ENSORLG00000001145 | scl22a4        | solute carrier family 22 (organic cation/zwitterion transporter), member 4 [Source:ZFIN;Acc:ZDB-GENE-040426-1517]      | 5.358340598 | 1.188736562  | -1.021130971 | 3.14895192   |
|  | ENSORLG00000004552 | -              | -                                                                                                                      | 15.7122367  | 18.18227795  | -1.75634884  | 0.813064246  |
|  | ENSORLG00000008610 | arhgef3l       | Rho guanine nucleotide exchange factor (GEF) 3, like [Source:ZFIN;Acc:ZDB-GENE-050922-85]                              | 4.136291689 | 1.537635572  | -1.670318245 | 0.928821876  |
|  | ENSORLG00000016399 | agtb           | serine - pyruvate aminotransferase [Source:NCBI geneAcc:101151325]                                                     | 7.05397491  | 1.175830319  | -2.890616151 | 2.998027957  |
|  | ENSORLG00000017115 | -              | -                                                                                                                      | 6.48025518  | -11.17997749 | -3.788522926 | 13.94211391  |
|  | ENSORLG00000016336 | -              | -                                                                                                                      | 8.248683112 | -7.50619986  | -7.125387775 | -1.384238575 |
|  | ENSORLG00000000398 | agrp           | agouti related neuropeptide [Source:ZFIN;Acc:ZDB-GENE-040817-1]                                                        | 7.69779008  | 2.252281674  | -3.353136771 | 0.092776239  |
|  | ENSORLG00000001030 | MID1IP1        | MID1 interacting protein 1 [Source:HGNC Symbol;Acc:HGNC:20715]                                                         | 3.686464607 | 1.196786972  | -0.667007392 | 1.823155128  |
|  | ENSORLG00000014533 | lunba          | transcription factor jun-B [Source:NCBI geneAcc:101169770]                                                             | 4.822666742 | 0.832788609  | -1.702848443 | 2.287514948  |
|  | ENSORLG00000009125 | scl5a11        | solute carrier family 5 (sodium/inositol cotransporter), member 11 [Source:ZFIN;Acc:ZDB-GENE-041114-9]                 | 7.19197539  | -8.620952902 | -2.977673091 | 12.83578397  |
|  | ENSORLG00000008562 | kcm2nb         | lysine O <sup>6</sup> -specific demethylase 2b [Source:ZFIN;Acc:ZDB-GENE-080275-13]                                    | 3.528782477 | 0.936165675  | 0.228996619  | 2.820097431  |
|  | ENSORLG00000017239 | ubt3           | ubiquitin protein ligase E3 component n-recogin 3 [Source:ZFIN;Acc:ZDB-GENE-030131-1473]                               | 3.732036611 | 1.86844782   | 0.672144738  | 2.536218959  |
|  | ENSORLG00000016099 | ptrn           | cleistothochin [Source:NCBI geneAcc:101158248]                                                                         | 3.139945877 | 2.55338896   | 1.719064016  | 2.306105941  |
|  | ENSORLG00000007121 | prkd2          | protein kinase D2 [Source:ZFIN;Acc:ZDB-GENE-131120-142]                                                                | 3.279544789 | 1.659266855  | -0.980083878 | 6.640678874  |
|  | ENSORLG00000017041 | HOX85 (1 of n) | homeobox B5 [Source:HGNC Symbol;Acc:HGNC:5116]                                                                         | 5.17301842  | 1.58571788   | -4.855850005 | -1.268072793 |
|  | ENSORLG00000014078 | kctd7          | potassium channel tetramerization domain containing 7 [Source:ZFIN;Acc:ZDB-GENE-060804-2]                              | 3.057735358 | 1.440134855  | 0.391143955  | 2.009228669  |
|  | ENSORLG00000003372 | -              | -                                                                                                                      | 4.788395627 | -0.028970113 | -2.310594526 | 2.506946027  |
|  | ENSORLG00000000364 | -              | -                                                                                                                      | 4.616264883 | 2.194247659  | -0.02371913  | 2.409553671  |
|  | ENSORLG00000000913 | si:ch73-63a15  | si:ch73-63a15.2 [Source:ZFIN;Acc:ZDB-GENE-091204-463]                                                                  | 3.707686556 | 1.005922387  | -1.329098501 | 1.373150624  |
|  | ENSORLG00000014142 | wasa           | Wiskott-Aldrich syndrome (eczema-thrombocytopenia) a [Source:ZFIN;Acc:ZDB-GENE-081104-419]                             | 4.377873956 | 1.630186374  | -2.798114571 | -0.049949869 |
|  | ENSORLG00000021762 | -              | -                                                                                                                      | 4.092921617 | 0.635813338  | -1.270433385 | 2.187154814  |
|  | ENSORLG00000016555 | rat3db         | RAB3D, member RAS oncogene family, b [Source:ZFIN;Acc:ZDB-GENE-040718-428]                                             | 3.022517784 | -0.534852847 | -2.255807428 | 1.302048211  |
|  | ENSORLG00000018183 | cox4i2         | cytochrome c oxidase subunit 1, mitochondrial [Source:NCBI geneAcc:101172078]                                          | 4.460236894 | 1.507034993  | -2.576218063 | 0.374688842  |
|  | ENSORLG00000005530 | -              | -                                                                                                                      | 3.26512627  | 0.954750335  | -1.868650565 | 0.432209866  |
|  | ENSORLG00000017013 | col1           | collagen type 1 alpha 1 [Source:NCBI geneAcc:100444988]                                                                | 5.191811628 | 2.204410913  | -3.937964556 | -0.950079044 |
|  | ENSORLG00000010286 | -              | -                                                                                                                      | 4.380129006 | 3.9140523    | 0.051841684  | 0.518400077  |
|  | ENSORLG00000004326 | tyrp1a         | tyrosinase-related protein 1a [Source:ZFIN;Acc:ZDB-GENE-070718-2]                                                      | 4.948163131 | 0.360301499  | -3.143251459 | 1.445094707  |
|  | ENSORLG00000001055 | gag2           | grass carp reovirus (GCRV)-induced gene 2 [Source:ZFIN;Acc:ZDB-GENE-081022-181]                                        | 5.576571063 | 2.902727706  | -0.990174048 | 1.684154521  |
|  | ENSORLG00000011450 | -              | -                                                                                                                      | 7.070895678 | 3.650848005  | -2.199359763 | 1.211171881  |
|  | ENSORLG00000004035 | -              | -                                                                                                                      | 4.851315873 | 0.963981356  | -2.648315414 | 1.239505013  |
|  | ENSORLG00000005297 | ab             | Oryzias latipes hemoglobin embryonic subunit alpha-like (LOC101155030), mRNA [Source:RefSeq mRNA;Acc:NM_001789881]     | 8.60010769  | 2.966423589  | -3.487102863 | 2.147066804  |
|  | ENSORLG00000015202 | adams15b       | ADAM metalloproteinase with thrombospondin type 1 motif, 15b [Source:ZFIN;Acc:ZDB-GENE-070814-5]                       | 4.657183268 | 1.342556331  | -3.805973502 | -0.490860161 |
|  | ENSORLG00000002623 | CCR7           | C-C motif chemokine receptor 7 [Source:HGNC Symbol;Acc:HGNC:1608]                                                      | 4.103422309 | 1.458820735  | -0.767671224 | 1.877415591  |
|  | ENSORLG00000015068 | scl52a3        | solute carrier family 52 (riboflavin transporter), member 3 [Source:ZFIN;Acc:ZDB-GENE-060421-4460]                     | 5.22591262  | 2.689781551  | -2.84576532  | -0.309154134 |
|  | ENSORLG00000010905 | tyr            | tyrosinase [Source:ZFIN;Acc:ZDB-GENE-991026-3]                                                                         | 4.78214752  | 0.927038729  | -2.20853005  | 1.647064508  |
|  | ENSORLG00000009484 | ofm2b          | noclin 2 [Source:NCBI geneAcc:101169664]                                                                               | 4.347741606 | 1.880430012  | -2.915804169 | -0.448006488 |
|  | ENSORLG00000008349 | scl6a7         | solute carrier family 6 member 7 [Source:ZFIN;Acc:ZDB-GENE-070112-1492]                                                | 3.727141759 | 0.496699539  | -1.192932711 | 2.03799539   |
|  | ENSORLG00000003034 | BMP2           | bone morphogenetic protein receptor type 2 [Source:HGNC Symbol;Acc:HGNC:1078]                                          | 3.329018574 | 0.893255809  | -0.800542163 | 1.635705657  |
|  | ENSORLG00000003985 | brt33          | E3 ubiquitin-protein ligase TRIM39 [Source:NCBI geneAcc:101163112]                                                     | 6.433318264 | 2.533719823  | -1.511366803 | 2.288716562  |
|  | ENSORLG00000003855 | ASB13 (1 of n) | ankyrin repeat and SOCS box containing 13 [Source:HGNC Symbol;Acc:HGNC:19763]                                          | 3.905238695 | 1.430539025  | -0.263152293 | 2.212032535  |
|  | ENSORLG00000016739 | zgc-64051      | leukocyte surface antigen CD53 [Source:NCBI geneAcc:101168124]                                                         | 4.014937892 | 2.508325589  | -1.801226039 | -0.294128954 |
|  | ENSORLG00000005254 | -              | -                                                                                                                      | 5.863525904 | 2.91547584   | -2.912596119 | 0.03939381   |
|  | ENSORLG00000016347 | nhsa           | Nance-Horan syndrome (congenital cataracts and dental anomalies) [Source:ZFIN;Acc:ZDB-GENE-090617-1]                   | 4.34742005  | 1.221393366  | -1.67948644  | 1.446847418  |
|  | ENSORLG00000011783 | chp12          | chondroitin polymerizing factor 2 [Source:ZFIN;Acc:ZDB-GENE-030131-7797]                                               | 4.159312355 | 2.5957542    | 0.682931765  | 2.246974311  |
|  | ENSORLG00000002211 | -              | -                                                                                                                      | 3.367163586 | 2.504417565  | 0.396820308  | 1.260050567  |
|  | ENSORLG00000015110 | -              | -                                                                                                                      | 5.219107312 | 0.319377072  | -1.964929496 | 2.932851617  |
|  | ENSORLG00000008574 | irf2           | interferon regulatory factor 2 [Source:ZFIN;Acc:ZDB-GENE-041212-38]                                                    | 5.953391844 | 3.299101386  | -1.523169346 | 1.131606059  |
|  | ENSORLG00000005190 | scn1b          | gabrain [Source:NCBI geneAcc:101159773]                                                                                | 5.432171473 | 0.918620432  | -3.289359335 | 1.22467665   |
|  | ENSORLG00000013182 | inpc1          | inpc1 [Source:ZFIN;Acc:ZDB-GENE-080819-1]                                                                              | 4.946668624 | 1.830741335  | 0.539472456  | 2.774836314  |
|  | ENSORLG00000012288 | MGMAM          | maltese-glycosylase [Source:HGNC Symbol;Acc:HGNC:7043]                                                                 | 4.356416544 | -1.117973417 | -2.746413393 | 2.27687405   |
|  | ENSORLG00000010524 | ana            | anilin a [Source:ZFIN;Acc:ZDB-GENE-030131-8434]                                                                        | 5.058158977 | 2.359258298  | -2.188123436 | 0.501280133  |
|  | ENSORLG00000005329 | kanh2          | KN motif and ankyrin repeat domains 2 [Source:ZFIN;Acc:ZDB-GENE-040724-121]                                            | 4.380230575 | 2.14474586   | -0.84503517  | 1.390933978  |
|  | ENSORLG00000001960 | si:ch211-51c1  | si:ch211-51c1.1 [Source:ZFIN;Acc:ZDB-GENE-120215-48]                                                                   | 4.101973881 | 1.686728385  | -0.051109696 | 0.364620317  |
|  | ENSORLG00000006726 | zgc-114045     | zgc-114045 [Source:ZFIN;Acc:ZDB-GENE-050913-119]                                                                       | 3.387640539 | 0.353390116  | -0.704456852 | 2.33027795   |
|  | ENSORLG00000017188 | -              | -                                                                                                                      | 5.064891545 | 0.675734074  | -5.218295324 | -0.828652375 |
|  | ENSORLG00000010348 | P2RY6          | pyrimidinergic receptor P2Y6 [Source:HGNC Symbol;Acc:HGNC:8543]                                                        | 5.226990277 | 2.234967447  | -0.912907462 | 2.079600014  |
|  | ENSORLG00000014390 | qf1b           | growth factor independent 1B transcription repressor [Source:ZFIN;Acc:ZDB-GENE-091118-129]                             | 5.65303964  | 1.92951203   | -1.683578663 | 2.040395422  |

|                     |                |                                                                                                                |             |              |              |              |
|---------------------|----------------|----------------------------------------------------------------------------------------------------------------|-------------|--------------|--------------|--------------|
| ENSRLOG00000017569  | marks1a        | MARCKS-like 1a [Source:ZFIN,Acc:ZDB-GENE-040426-2146]                                                          | 5.221144992 | 1.743626837  | -2.548259095 | 0.92974414   |
| ENSRLOG00000013837  | -              | -                                                                                                              | 3.32570674  | 1.438577067  | -1.341085603 | 0.546528872  |
| ENSRLOG00000003773  | mrx2b          | motor neuron and pancreas homeobox 2b [Source:ZFIN,Acc:ZDB-GENE-040415-2]                                      | 4.127347964 | 2.476336394  | -2.564782051 | -0.913285013 |
| ENSRLOG00000002067  | SRF1 (1 of m   | serum response factor 1 [Source:HGNC,Symbol,Acc:HGNC:3360]                                                     | 4.54510061  | 1.690516985  | -2.79873823  | -0.015353547 |
| ENSRLOG00000010690  | krf9           | Kruppel-like factor 9 [Source:ZFIN,Acc:ZDB-GENE-060526-244]                                                    | 3.44769538  | 0.787927844  | -1.096888719 | 1.563363999  |
| ENSRLOG00000013637  | lcat2          | lysophosphatidylcholine acyltransferase 2 [Source:ZFIN,Acc:ZDB-GENE-050522-229]                                | 3.663439941 | 2.1368755    | -1.113144035 | 0.413904987  |
| ENSRLOG00000004609  | ltga1          | integrin, alpha 1 [Source:ZFIN,Acc:ZDB-GENE-091118-115]                                                        | 3.068865276 | 2.85201875   | -0.06874989  | 0.148580122  |
| ENSRLOG00000006420  | capgb          | capping actin protein, gelsolin like [Source:NCBI gene,Acc:101163360]                                          | 4.53735545  | 1.581819061  | -1.951244586 | 1.004776783  |
| ENSRLOG00000002764  | si:dkeyp-86f7  | si:dkeyp-86f7 4 [Source:ZFIN,Acc:ZDB-GENE-091204-252]                                                          | 5.382815724 | -0.354390362 | -3.26175131  | 2.441515172  |
| ENSRLOG00000005169  | arhgap32a      | Rho GTPase activating protein 32a [Source:ZFIN,Acc:ZDB-GENE-060503-918]                                        | 5.276669901 | 1.557640371  | -0.983512583 | 2.736004714  |
| ENSRLOG00000003776  | -              | -                                                                                                              | 3.507523778 | 1.78337373   | -2.424259845 | 0.69944573   |
| ENSRLOG00000004197  | ly75           | lymphocyte antigen 75 [Source:ZFIN,Acc:ZDB-GENE-050309-166]                                                    | 4.227797598 | 1.088639554  | -1.156137305 | 1.983505578  |
| ENSRLOG00000007909  | hoxc11a        | homeobox C11a [Source:ZFIN,Acc:ZDB-GENE-990415-111]                                                            | 4.175626452 | -0.533812071 | -2.337976697 | 2.371946131  |
| ENSRLOG00000007955  | hoxf4          | Oryzias latipes homeobox C4 (hoxc4), mRNA [Source:RefSeq, mRNA,Acc:NM_001104878]                               | 3.489530974 | 0.692830756  | -3.024329459 | -0.247144143 |
| ENSRLOG00000000800  | nav2a          | neuron navigator 2b [Source:ZFIN,Acc:ZDB-GENE-120502-31]                                                       | 3.712179714 | 2.176228935  | -1.196557903 | 0.339877093  |
| ENSRLOG00000001756  | NPTX1          | neuronal pentraxin 1 [Source:HGNC Symbol,Acc:HGNC:7852]                                                        | 4.059650955 | 0.767919371  | -2.218599152 | 1.07361644   |
| ENSRLOG00000010018  | rc3h2          | ring finger and CCH-type domains 2 [Source:ZFIN,Acc:ZDB-GENE-060503-694]                                       | 4.983926581 | 2.574780844  | -0.158925371 | 2.250705316  |
| ENSRLOG00000002535  | ttc36          | tetratricopeptide repeat domain 36 [Source:NCBI gene,Acc:10110298]                                             | 5.872261003 | 1.549397876  | -2.510972542 | 1.812375226  |
| ENSRLOG000000016818 | RBMS1 (1 of m  | RNA binding motif single stranded interacting protein 1 [Source:HGNC Symbol,Acc:HGNC:9907]                     | 3.473553069 | 1.285082856  | -0.434618048 | 1.754337775  |
| ENSRLOG00000002901  | -              | -                                                                                                              | 3.851166948 | 1.891135822  | -1.208175021 | 0.752339977  |
| ENSRLOG00000009620  | fscn1b         | fascin actin-bundling protein 1b [Source:ZFIN,Acc:ZDB-GENE-120507-1]                                           | 3.608753994 | 0.671569769  | -0.857435615 | 2.080234567  |
| ENSRLOG00000012415  | -              | -                                                                                                              | 3.918028874 | 1.91805282   | 0.348538802  | 2.348846535  |
| ENSRLOG00000003020  | gb             | Oryzias latipes hemoglobin subunit beta-1-like (gb), mRNA [Source:RefSeq, mRNA,Acc:NM_001278824]               | 6.325032807 | 0.111864033  | -3.950626181 | 2.263027464  |
| ENSRLOG000000010775 | tzd4           | triazolide class receptor 4 [Source:ZFIN,Acc:ZDB-GENE-990415-217]                                              | 4.503750283 | 1.735400971  | -0.392031769 | 2.376802288  |
| ENSRLOG00000007672  | -              | -                                                                                                              | 5.652550364 | 1.13076724   | -3.844471724 | 0.677801249  |
| ENSRLOG00000000406  | -              | -                                                                                                              | 4.897475662 | 0.95757658   | -1.830037982 | 2.110786573  |
| ENSRLOG00000001370  | -              | -                                                                                                              | 4.730807191 | 2.805463476  | 2.234236064  | 2.1609046    |
| ENSRLOG000000011418 | ntcd5          | ntf1-dependent gene 5 [Source:ZFIN,Acc:ZDB-GENE-031030-7]                                                      | 4.866703477 | 2.644188915  | -1.572937441 | 0.65006267   |
| ENSRLOG00000017257  | -              | -                                                                                                              | 3.526729007 | 1.261425401  | -2.50321202  | -0.237423434 |
| ENSRLOG000000010567 | si:dkey-51d8   | si:dkey-51d8 3 [Source:ZFIN,Acc:ZDB-GENE-081103-8]                                                             | 4.711009094 | 3.172951799  | -1.27862408  | 0.261921744  |
| ENSRLOG00000007061  | -              | -                                                                                                              | 3.747574187 | 2.420332893  | -0.503899979 | 0.823861222  |
| ENSRLOG00000003007  | rlp19 (1 of m  | 60S ribosomal protein L19 [Source:NCBI gene,Acc:10137445]                                                      | 3.538074785 | 0.84055303   | -1.560776783 | 1.137229914  |
| ENSRLOG000000017926 | bach2b         | BTB and CNC homology 1, basic leucine zipper transcription factor 2b [Source:ZFIN,Acc:ZDB-GENE-041001-139]     | 3.414447005 | 1.711111105  | -2.409319453 | -0.705498657 |
| ENSRLOG00000007937  | PHLPP2         | PH domain and leucine rich repeat protein phosphatase 2 [Source:HGNC Symbol,Acc:HGNC:29149]                    | 3.266513279 | 1.519615991  | -1.076818546 | 0.670563157  |
| ENSRLOG000000018111 | TMEM67A        | transmembrane protein 67A [Source:HGNC Symbol,Acc:HGNC:24529]                                                  | 3.48284629  | 1.190127567  | -0.224082736 | 2.069119674  |
| ENSRLOG00000009268  | srfs5a         | serine and arginine rich splicing factor 5 [Source:NCBI gene,Acc:101161448]                                    | 3.111426532 | 1.06852828   | 0.02670949   | 2.070091525  |
| ENSRLOG000000015567 | pou6f1         | POU class 6 homeobox 1 [Source:ZFIN,Acc:ZDB-GENE-980526-530]                                                   | 3.65218243  | 1.084466566  | -0.331288817 | 2.236912968  |
| ENSRLOG000000004402 | tp73           | tumor protein p73 [Source:ZFIN,Acc:ZDB-GENE-030814-21]                                                         | 5.989561703 | 1.264491093  | -0.836063068 | 3.889489754  |
| ENSRLOG00000005899  | -              | -                                                                                                              | 4.021738524 | -2.534924635 | -4.075985738 | 2.481161094  |
| ENSRLOG00000007133  | -              | -                                                                                                              | 3.473505407 | -13.15645603 | -3.75708673  | 13.37338313  |
| ENSRLOG000000015651 | csmp2          | cysteine-serine-rich nuclear protein 2 [Source:ZFIN,Acc:ZDB-GENE-080312-137]                                   | 4.988530669 | 1.915446036  | -1.280503476 | 1.788519955  |
| ENSRLOG00000009359  | -              | -                                                                                                              | 5.452802157 | 1.835285893  | -2.925818897 | 0.692186157  |
| ENSRLOG000000013268 | tnfrsf10       | TNF superfamily member 10 [Source:ZFIN,Acc:ZDB-GENE-040718-335]                                                | 3.653705256 | 1.966816015  | -1.727609138 | -0.040234882 |
| ENSRLOG000000013104 | -              | -                                                                                                              | 3.466392934 | 2.053811646  | -0.420269185 | 0.992791778  |
| ENSRLOG00000004325  | -              | -                                                                                                              | 6.514295037 | -9.677807716 | -1.477093276 | 14.71551859  |
| ENSRLOG00000003505  | -              | -                                                                                                              | 3.466292486 | 0.047981914  | -0.577486723 | 2.841310102  |
| ENSRLOG000000017886 | collec12       | collectin sub-family member 12 [Source:ZFIN,Acc:ZDB-GENE-030131-9807]                                          | 3.37724709  | 2.641289566  | -2.22362672  | -1.487184235 |
| ENSRLOG000000010321 | cd2ry10        | P2Y receptor family member 10 [Source:ZFIN,Acc:ZDB-GENE-070410-105]                                            | 5.578096721 | 2.16178254   | -2.282049896 | 1.134746081  |
| ENSRLOG000000000559 | TNNI2 (1 of m  | tropomyosin 12, fast skeletal type [Source:HGNC Symbol,Acc:HGNC:11946]                                         | 4.747495654 | 0.447224035  | -5.661149924 | -1.360393999 |
| ENSRLOG00000007523  | c2cd2l         | c2cd2-like [Source:ZFIN,Acc:ZDB-GENE-041019-1]                                                                 | 3.565882031 | 0.658033076  | -1.421756135 | 1.486576816  |
| ENSRLOG000000013130 | apodb (1 of m  | apolipoprotein Db [Source:ZFIN,Acc:ZDB-GENE-051023-8]                                                          | 5.894784224 | 1.186424068  | -2.930150917 | 1.778693986  |
| ENSRLOG000000015267 | btg1           | BTG anti-proliferation factor 1 [Source:NCBI gene,Acc:101168651]                                               | 4.238858086 | 1.17318338   | -2.845879887 | 0.220279555  |
| ENSRLOG000000015915 | si:dkey-21a6.5 | si:dkey-21a6.5 [Source:ZFIN,Acc:ZDB-GENE-131121-257]                                                           | 5.569968154 | 2.898939015  | -0.095752158 | 2.575759446  |
| ENSRLOG000000008560 | pdia2          | protein disulfide isomerase family A, member 2 [Source:ZFIN,Acc:ZDB-GENE-040426-705]                           | 4.118794783 | 1.09445304   | -2.944983826 | 0.07942925   |
| ENSRLOG00000007509  | arab5b         | CAMP response element binding protein 5b [Source:ZFIN,Acc:ZDB-GENE-091020-6]                                   | 4.012277468 | 1.644515306  | -1.72688827  | 0.642160029  |
| ENSRLOG000000006785 | dk2            | dkk2ip1 WNT signaling pathway inhibitor 2 [Source:ZFIN,Acc:ZDB-GENE-080204-14]                                 | 3.538619311 | 1.377242526  | 0.169635744  | 2.331496707  |
| ENSRLOG000000016748 | lamb1b         | laminin subunit beta-1 [Source:NCBI gene,Acc:101165882]                                                        | 3.251010421 | 2.244165231  | -1.755276151 | -0.747946053 |
| ENSRLOG000000012030 | styk1b         | serine/threonine-tyrosine kinase 1b [Source:ZFIN,Acc:ZDB-GENE-030131-3435]                                     | 6.928265438 | 1.950736745  | -4.948255882 | 0.029742548  |
| ENSRLOG00000002526  | fermt3b        | fermitin family member 3b [Source:ZFIN,Acc:ZDB-GENE-040426-1366]                                               | 3.42187949  | 1.498378337  | -1.714488688 | 0.209497437  |
| ENSRLOG000000004035 | -              | -                                                                                                              | 16.73441485 | 0            | -3.965904847 | 12.76900099  |
| ENSRLOG00000003968  | sp4            | Sp4 transcription factor [Source:HGNC Symbol,Acc:HGNC:11209]                                                   | 3.776018071 | 1.10309995   | -0.159823817 | 2.513578384  |
| ENSRLOG000000012155 | rxra           | retinoid X receptor, alpha 1 [Source:ZFIN,Acc:ZDB-GENE-070314-2]                                               | 4.116069249 | 1.647112352  | -1.336782722 | 1.132658279  |
| ENSRLOG000000002465 | kkkb           | inhibitor of kappa light polypeptide gene enhancer in B-cells, kinase beta [Source:ZFIN,Acc:ZDB-GENE-071115-2] | 3.593572904 | 1.480995407  | -1.089626304 | 1.023436162  |
| ENSRLOG000000002049 | si:dkeyp-87d8  | si:dkeyp-87d8 8 [Source:ZFIN,Acc:ZDB-GENE-041111-161]                                                          | 4.404974517 | 0.726107579  | -0.9222901   | 2.75706936   |
| ENSRLOG000000017372 | dk2a           | distal-less homeobox 2a [Source:ZFIN,Acc:ZDB-GENE-980526-212]                                                  | 3.72459942  | -1.063110168 | -2.781439645 | 2.006613802  |

|                     |                  |                                                                                                                   |             |              |              |              |
|---------------------|------------------|-------------------------------------------------------------------------------------------------------------------|-------------|--------------|--------------|--------------|
| ENSRGLG00000016573  | myb              | Oryzias latipes MYB proto-oncogene, transcription factor (myb), mRNA [Source:RefSeq; mRNAAccession:001104689]     | 3.016783936 | 0.417091136  | -0.554459637 | 2.045717732  |
| ENSRGLG00000018188  | -                | -                                                                                                                 | 5.532851228 | 0.746231352  | -2.799147881 | 1.987956944  |
| ENSRGLG00000001272  | tgf1a1           | transforming growth factor, beta 1a [Source:ZFIN;Acc:ZDB-GENE-030618_1]                                           | 4.401201635 | 2.155845366  | 0.044052438  | 2.289894035  |
| ENSRGLG00000002467  | daps             | dihydropyrimidinase [Source:ZFIN;Acc:ZDB-GENE-070508_1]                                                           | 4.252299661 | -0.339048899 | -4.110797463 | 0.481037663  |
| ENSRGLG00000000328  | stc1l            | stromal cell 1, like [Source:ZFIN;Acc:ZDB-GENE-040426_1821]                                                       | 10.30396611 | -1.794215768 | -8.304149548 | 3.794538042  |
| ENSRGLG00000013632  | -                | -                                                                                                                 | 4.910154168 | 0.161680274  | -3.356083328 | 1.392875477  |
| ENSRGLG00000016898  | slip             | selectin P [Source:ZFIN;Acc:ZDB-GENE-110107_21]                                                                   | 4.559320754 | 2.962195084  | -2.642273754 | 1.04466368   |
| ENSRGLG00000007200  | pev5fb           | peroxisomal biogenesis factor 5-like 1 [Source:ZFIN;Acc:ZDB-GENE-111221_1]                                        | 3.554321301 | 0.852933964  | -0.560358848 | 2.141510947  |
| ENSRGLG00000000070  | large2           | LARGE xylosyl- and glucuronyltransferase 2 [Source:ZFIN;Acc:ZDB-GENE-050419_253]                                  | 4.11068377  | 1.507085735  | -0.296074346 | 0.50739418   |
| ENSRGLG000000008277 | ptfla            | pancreas associated transcription factor 1a [Source:NCBI; gene:Acc:101160350]                                     | 16.71999249 | 9.594380594  | -4.93275808  | 2.193323771  |
| ENSRGLG00000013548  | Flu1             | Flu-1 proto-oncogene, ETS transcription factor [Source:HGNC; Symbol; Acc:HGNC:3749]                               | 4.437979421 | 2.140620312  | -1.940293546 | 0.357549324  |
| ENSRGLG00000004854  | -                | -                                                                                                                 | 3.912413923 | 0.752867684  | -1.434307819 | 1.726724354  |
| ENSRGLG00000007299  | -                | -                                                                                                                 | 3.027864871 | -0.136526954 | -2.853492881 | 0.281384372  |
| ENSRGLG00000001724  | EXT1 (1 of many) | extosian glycosyltransferase 1 [Source:HGNC; Symbol; Acc:HGNC:3512]                                               | 3.238404085 | 0.48185021   | -2.314352531 | 0.442806452  |
| ENSRGLG00000017303  | zpc15405b        | zpc15405b [Source:ZFIN;Acc:ZDB-GENE-060929_612]                                                                   | 5.750758892 | 1.71371053   | -1.488430787 | 1.549029961  |
| ENSRGLG00000009476  | foxp1            | forkhead box P1 [Source:NCBI; gene:Acc:101171163]                                                                 | 3.613536146 | 1.570919133  | -3.848970464 | 0.159089553  |
| ENSRGLG00000005775  | TGFB11           | transforming growth factor beta 1 induced transcript 1 [Source:HGNC; Symbol; Acc:HGNC:11767]                      | 4.057482752 | 1.931854571  | -1.73843932  | 0.387679137  |
| ENSRGLG00000017030  | -                | -                                                                                                                 | 3.869692323 | 2.258468547  | 0.230844625  | 1.842553337  |
| ENSRGLG00000001186  | hspb8            | heat shock protein family B (small) member 8 [Source:NCBI; gene:Acc:101166228]                                    | 3.222328152 | 1.143760314  | -1.759854177 | 0.320152365  |
| ENSRGLG00000011146  | h3s3b1b          | hesian sulfate (glucosamine) 3-O-sulfotransferase 3B1b [Source:ZFIN;Acc:ZDB-GENE-070202_5]                        | 4.066432141 | 2.503169873  | -0.909051725 | 0.654696241  |
| ENSRGLG00000008984  | -                | -                                                                                                                 | 4.742367274 | 0.877383688  | -2.289940348 | 1.575529426  |
| ENSRGLG00000012559  | prapa            | GRB2 related adaptor protein A [Source:ZFIN;Acc:ZDB-GENE-050522_347]                                              | 6.154149779 | 3.831144315  | -1.348175466 | 0.97307715   |
| ENSRGLG00000008497  | -                | -                                                                                                                 | 4.25354386  | 1.027875549  | -2.860263784 | 0.365899406  |
| ENSRGLG00000004233  | Tgf18a           | fibroblast growth factor 18a [Source:ZFIN;Acc:ZDB-GENE-030714_1]                                                  | 3.926417052 | 1.578885999  | -0.653001103 | 1.695013218  |
| ENSRGLG00000005185  | -                | -                                                                                                                 | 4.673662063 | 2.041068939  | 0.125776174  | 2.758853423  |
| ENSRGLG00000015849  | foxp4            | forkhead box P4 [Source:ZFIN;Acc:ZDB-GENE-101207_1]                                                               | 4.71015307  | 1.50841309   | -2.939878394 | 0.222535827  |
| ENSRGLG00000017116  | foxb             | Fox b [Source:NCBI; gene:Acc:100048473]                                                                           | 4.701761138 | -0.101761138 | -3.197759943 | 1.839111734  |
| ENSRGLG00000014598  | -                | -                                                                                                                 | 3.120109614 | 2.477046724  | 0.116102977  | 0.759658854  |
| ENSRGLG00000001976  | FLIP1L           | flavin A interacting protein 1 like [Source:HGNC; Symbol; Acc:HGNC:24589]                                         | 3.279896615 | 0.923541818  | -1.7964714   | 0.56042179   |
| ENSRGLG00000015696  | atp1b1a          | sodium/potassium-transporting ATPase subunit beta-233 [Source:NCBI; gene:Acc:101164836]                           | 3.399369992 | 2.054933594  | 1.151030607  | 2.49594913   |
| ENSRGLG00000018010  | col4a1           | collagen, type IV, alpha 1 [Source:ZFIN;Acc:ZDB-GENE-081105_114]                                                  | 4.73090968  | 2.538103336  | -0.191907418 | 1.174213179  |
| ENSRGLG000000016936 | dusp3b           | dual specificity phosphatase 3b [Source:ZFIN;Acc:ZDB-GENE-030616_38]                                              | 4.167039994 | 1.884761264  | -1.822685345 | 0.460076337  |
| ENSRGLG00000017550  | zfp9b            | zinc finger, NFX1-type containing 1 [Source:ZFIN;Acc:ZDB-GENE-091111_3]                                           | 3.065257824 | 0.854134422  | 0.168110734  | 2.379718411  |
| ENSRGLG00000006096  | znfx1            | zinc finger, NFX1-type containing 1 [Source:ZFIN;Acc:ZDB-GENE-110904_2]                                           | 3.574738602 | 1.320504306  | -0.50857348  | 1.746145848  |
| ENSRGLG00000013955  | mra9b            | matrix-remodelling associated 9b [Source:ZFIN;Acc:ZDB-GENE-061013_368]                                            | 3.098212545 | 1.760771921  | -0.563581025 | 0.77434358   |
| ENSRGLG00000017624  | sqp1a.1          | equippin 1 (Colton blood group) [Source:NCBI; gene:Acc:101155722]                                                 | 5.594957124 | 0.857275919  | -4.957453698 | -0.219287624 |
| ENSRGLG00000005043  | hoxa13a          | homeobox protein Hox-A13a [Source:NCBI; gene:Acc:101162380]                                                       | 5.320202892 | -0.041157662 | -2.702622702 | 2.659223152  |
| ENSRGLG00000016599  | agap2            | ARFAP with G1-Pase domain, ankyrin repeat and PH domain 2 [Source:ZFIN;Acc:ZDB-GENE-061103_343]                   | 5.382384574 | 2.320438994  | -2.11250124  | 0.950326166  |
| ENSRGLG00000016757  | lxn              | leucamin [Source:ZFIN;Acc:ZDB-GENE-081105_159]                                                                    | 4.551561274 | 1.787589227  | -2.05082846  | 0.713648092  |
| ENSRGLG00000009099  | zap70            | zeta chain of T cell receptor associated protein kinase 70 [Source:ZFIN;Acc:ZDB-GENE-050522_257]                  | 4.510614142 | 1.660394266  | -1.314531672 | 1.53617357   |
| ENSRGLG00000014709  | megf10           | multiple EF-like domains 10 [Source:ZFIN;Acc:ZDB-GENE-080506_1]                                                   | 4.577992248 | 2.043382963  | -1.719311885 | 0.815786415  |
| ENSRGLG00000003223  | hsd11b2          | hydroxysteroid (11-beta) dehydrogenase 2 [Source:ZFIN;Acc:ZDB-GENE-030131_6030]                                   | 3.628092728 | 2.239966358  | -2.841183106 | 1.452572035  |
| ENSRGLG00000004247  | flnca            | flamin C [Source:NCBI; gene:Acc:101165476]                                                                        | 4.603988898 | 1.818308339  | -2.633275739 | 1.514891543  |
| ENSRGLG00000002516  | -                | -                                                                                                                 | 4.612424605 | 1.57614038   | -1.573001478 | 1.463767778  |
| ENSRGLG00000002650  | -                | -                                                                                                                 | 3.147689025 | 1.969546094  | 0.416603816  | 1.592318003  |
| ENSRGLG00000012975  | -                | -                                                                                                                 | 3.815397463 | 2.229650386  | -0.63590108  | 0.951140252  |
| ENSRGLG00000000480  | STK32C           | serine/threonine kinase 32C [Source:HGNC; Symbol; Acc:HGNC:21332]                                                 | 3.679081199 | 1.114716732  | -2.981076138 | -0.416224751 |
| ENSRGLG00000009545  | mena             | mosasin A [Source:ZFIN;Acc:ZDB-GENE-071211_2]                                                                     | 3.203843184 | 1.252107546  | 0.052589288  | 2.007509921  |
| ENSRGLG00000013669  | zbtb8b           | zinc finger and BTB domain containing 8b [Source:ZFIN;Acc:ZDB-GENE-050417_42]                                     | 3.754973348 | 1.635034449  | -0.543626558 | 1.576797015  |
| ENSRGLG00000008590  | hsd3b1           | hydroxy-delta-5-steroid dehydrogenase, 3 beta- and steroid delta-isomerase 1 [Source:ZFIN;Acc:ZDB-GENE-081105_30] | 5.516117956 | 2.677749991  | -0.946999041 | 1.89185381   |
| ENSRGLG00000012886  | -                | -                                                                                                                 | 16.73753084 | 14.12732858  | -0.371711448 | 2.238958348  |
| ENSRGLG00000004672  | thsd1            | thrombospondin, type 1, domain containing 1 [Source:ZFIN;Acc:ZDB-GENE-100105_3]                                   | 4.330343253 | 2.015521765  | -0.259781132 | 2.055525618  |
| ENSRGLG00000008388  | agtr2            | angiotensin II receptor, type 2 [Source:ZFIN;Acc:ZDB-GENE-030306_36]                                              | 3.598308297 | 1.736192643  | -2.21606775  | -0.353466237 |
| ENSRGLG00000016394  | -                | -                                                                                                                 | 3.471120966 | 1.388750677  | -2.420811878 | -0.337956058 |
| ENSRGLG00000019378  | -                | -                                                                                                                 | 3.426024202 | 2.262081295  | -1.822588647 | -0.650138531 |
| ENSRGLG00000007016  | desmb            | desmin b [Source:ZFIN;Acc:ZDB-GENE-061027_102]                                                                    | 4.774261151 | -0.395171438 | -5.438742669 | -0.353461059 |
| ENSRGLG00000003261  | lam20b           | family with sequence similarity 20, member Cb [Source:ZFIN;Acc:ZDB-GENE-050301_4]                                 | 3.890983663 | 2.310470967  | -0.694529302 | 0.876467408  |
| ENSRGLG00000010908  | tmp2a            | TMP metalloproteinase inhibitor 2a [Source:ZFIN;Acc:ZDB-GENE-030612_1]                                            | 4.32677345  | 2.310039707  | -0.900331571 | 1.116886993  |
| ENSRGLG00000006160  | -                | -                                                                                                                 | 6.92092173  | 3.209560286  | -2.629224745 | 1.08260784   |
| ENSRGLG00000017372  | -                | -                                                                                                                 | 4.530208193 | -0.74743906  | -3.086038634 | 2.23304163   |
| ENSRGLG00000007399  | dapk2b           | death-associated protein kinase 2b [Source:ZFIN;Acc:ZDB-GENE-060810_178]                                          | 3.129862537 | 1.180639588  | 0.162017401  | 2.131782254  |
| ENSRGLG00000017758  | odc1             | ornithine decarboxylase 1 [Source:ZFIN;Acc:ZDB-GENE-030816_1]                                                     | 3.753984305 | 1.783351625  | -0.514750792 | 1.456367035  |
| ENSRGLG00000004727  | gnomb            | glycoprotein (transmembrane) nmb [Source:ZFIN;Acc:ZDB-GENE-060503_106]                                            | 5.631878893 | 2.323452267  | -3.396583125 | -0.087671422 |
| ENSRGLG00000012269  | -                | -                                                                                                                 | 5.162463141 | 1.125813891  | -1.62334685  | 2.413786283  |
| ENSRGLG00000009499  | ngfa             | nerve growth factor (beta polypeptide) [Source:ZFIN;Acc:ZDB-GENE-990415_176]                                      | 3.649486901 | 2.025131314  | 1.161737843  | 2.786577234  |
| ENSRGLG00000000027  | -                | -                                                                                                                 | 3.715128452 | 0.917084209  | -1.208586193 | 1.589886572  |
| ENSRGLG00000009533  | lgnn             | leucamin [Source:NCBI; gene:Acc:101163371]                                                                        | 4.701500574 | 0.253352104  | -4.767591789 | -0.31895838  |
| ENSRGLG00000017972  | -                | -                                                                                                                 | 5.546695694 | 2.640471351  | -1.422733095 | 1.483916024  |
| ENSRGLG00000001041  | mf141            | ring finger protein 141 [Source:NCBI; gene:Acc:101159666]                                                         | 4.032127728 | 1.079010437  | -1.026428818 | 1.92717304   |
| ENSRGLG00000005588  | tmem47           | transmembrane protein 47 [Source:NCBI; gene:Acc:101155915]                                                        | 15.98861533 | 12.6445706   | -1.105694677 | 2.248817078  |
| ENSRGLG00000013710  | hpr2             | natriuretic peptide receptor 2 [Source:ZFIN;Acc:ZDB-GENE-141030_2]                                                | 3.855096816 | 0.964374158  | -1.662540483 | 1.228668204  |
| ENSRGLG00000001264  | slc4a2b          | solute carrier family 4 (anion exchanger), member 2b [Source:ZFIN;Acc:ZDB-GENE-030429_14]                         | 3.13295304  | -0.407657213 | -2.048820652 | 1.49227444   |

|                     |                 |                                                                                                                                                       |             |              |               |              |
|---------------------|-----------------|-------------------------------------------------------------------------------------------------------------------------------------------------------|-------------|--------------|---------------|--------------|
| ENSORLG0000001909   | irtv4           | ets variant 4 [Source:ZFIN;Acc:ZDB-GENE-990415-71]                                                                                                    | 4.53679238  | 1.990208458  | -1.277834432  | 1.269232633  |
| ENSORLG0000002530   | -               | -                                                                                                                                                     | 7.282110288 | 4.802364434  | -0.648039335  | 1.832187942  |
| ENSORLG0000002030   | cthrca1a        | collagen triple helix repeat containing 1 [Source:NCBI;gene:Acc:101160936]                                                                            | 5.183044226 | 2.767602375  | -0.570097989  | 2.986024622  |
| ENSORLG00000006049  | sh3px2ab        | SH3 and PX domains 2Ab [Source:ZFIN;Acc:ZDB-GENE-101220-1]                                                                                            | 3.63993184  | 1.328598568  | -0.879280468  | 1.432544978  |
| ENSORLG00000006696  | plekha7b        | pleckstrin homology domain containing, family A member 7b [Source:ZFIN;Acc:ZDB-GENE-091014-2]                                                         | 3.655723349 | 2.125395017  | -0.587386249  | 2.118209904  |
| ENSORLG00000009933  | anp2            | agnasec 2 [Source:ZFIN;Acc:ZDB-GENE-030131-1334]                                                                                                      | 4.781815136 | 0.5468970263 | -3.745531486  | 0.491798302  |
| ENSORLG0000002236   | lec3b3b         | C-type lectin domain family 3 member B [Source:NCBI;gene:Acc:101160080]                                                                               | 17.84364869 | 13.44385655  | -2.835738516  | 1.564522066  |
| ENSORLG00000004311  | ERP27           | endoplasmic reticulum protein 27 [Source:NCBI;gene:Acc:101158668]                                                                                     | 3.904700268 | 2.611559877  | -1.604139093  | -0.310513498 |
| ENSORLG00000009207  | -               | -                                                                                                                                                     | 5.65946832  | -10.0266341  | -2.864081023  | 12.8200054   |
| ENSORLG00000015142  | -               | -                                                                                                                                                     | 4.4647668   | 1.50949223   | -1.299820413  | 1.664488616  |
| ENSORLG00000005072  | -               | -                                                                                                                                                     | 3.41980736  | -1.757807169 | -1.057994738  | 4.111117445  |
| ENSORLG00000010885  | tmipa           | thioredoxin interacting protein [Source:NCBI;gene:Acc:101174114]                                                                                      | 4.330049872 | 1.480784111  | -1.863976055  | 0.985774618  |
| ENSORLG00000015176  | ctsk            | cathepsin K [Source:NCBI;gene:Acc:101164923]                                                                                                          | 5.598085148 | 2.738493818  | -1.977327273  | 0.874909844  |
| ENSORLG00000010119  | -               | -                                                                                                                                                     | 4.395846905 | 2.901688642  | -1.851951899  | -0.357308331 |
| ENSORLG00000006177  | slc21l1-153b    | ES1 protein homolog, mitochondrial-like [Source:NCBI;gene:Acc:101169045]                                                                              | 4.855059844 | 1.665542018  | -0.2031683201 | 1.158319457  |
| ENSORLG00000000346  | -               | -                                                                                                                                                     | 3.336029156 | 0.736029496  | -1.635828723  | 0.964655877  |
| ENSORLG00000008930  | ctnbp2nb        | CTNBP2 N-terminal like 1 [Source:ZFIN;Acc:ZDB-GENE-040724-65]                                                                                         | 4.099328101 | 0.35086238   | -1.394874224  | 2.354077339  |
| ENSORLG00000004307  | -               | -                                                                                                                                                     | 5.853194415 | 1.002907168  | -3.048037039  | 1.804734758  |
| ENSORLG00000004707  | alas2           | 5-aminolevulinic synthase, erythroid-specific, mitochondrial [Source:NCBI;gene:Acc:100049501]                                                         | 6.295577672 | 0.671191826  | -4.352806609  | 1.272064175  |
| ENSORLG00000004279  | rtfox2          | RNA binding fox-1 homolog 2 [Source:ZFIN;Acc:ZDB-GENE-040276-2464]                                                                                    | 5.536500002 | 2.506821541  | -0.238100326  | 2.791969882  |
| ENSORLG00000015302  | sema4c          | sema domain, immunoglobulin domain (Ig), transmembrane domain (TM) and short cytoplasmic domain, (semaphorin) 4C [Source:ZFIN;Acc:ZDB-GENE-080303-16] | 3.324405844 | 1.392599383  | -2.208055317  | -0.275763628 |
| ENSORLG00000004188  | lacc1           | laccase (multicopper oxidoreductase) domain containing 1 [Source:ZFIN;Acc:ZDB-GENE-081104-155]                                                        | 4.629728977 | 1.640426123  | -2.077525266  | 0.912034969  |
| ENSORLG00000001598  | -               | -                                                                                                                                                     | 3.788391009 | 0.789733778  | -1.972060422  | 1.027081513  |
| ENSORLG00000015518  | zgc:162297      | uncharacterized protein F13E9.13, mitochondrial [Source:NCBI;gene:Acc:101155838]                                                                      | 3.277528461 | 1.937208857  | -0.516770564  | 0.824033868  |
| ENSORLG00000000678  | tnnt3a          | troponin T, fast skeletal muscle isoforms [Source:NCBI;gene:Acc:101157127]                                                                            | 6.587475683 | 1.499037608  | -6.11879836   | -1.0298783   |
| ENSORLG00000017721  | esr2            | estrogen receptor beta [Source:NCBI;gene:Acc:100049289]                                                                                               | 3.249629361 | 0.887182671  | -1.958066907  | 0.404865755  |
| ENSORLG00000010760  | -               | -                                                                                                                                                     | 5.49645753  | -1.057892327 | -3.857791551  | 2.697048771  |
| ENSORLG00000017403  | PRKD3           | protein kinase D3 [Source:HGNC]                                                                                                                       | 3.019424483 | 1.736352051  | 1.10445451    | 2.388016114  |
| ENSORLG00000016487  | nrf3-6          | nuclear factor, interleukin 3 regulated, member 6 [Source:ZFIN;Acc:ZDB-GENE-040704-63]                                                                | 4.270910029 | 0.955487261  | -2.063766704  | 1.252140796  |
| ENSORLG00000004570  | cldn1           | claudin-7 [Source:NCBI;gene:Acc:101156528]                                                                                                            | 4.549519858 | -11.08616277 | -1.663940765  | 13.97225287  |
| ENSORLG00000000963  | -               | -                                                                                                                                                     | 3.106316305 | -0.379670561 | -1.672933038  | 1.813648611  |
| ENSORLG00000014038  | rap1gap2a       | RAP1 GTPase activating protein 2a [Source:ZFIN;Acc:ZDB-GENE-061013-179]                                                                               | 5.690471399 | 1.383167209  | -1.71945209   | 2.58944848   |
| ENSORLG00000015570  | plcg2           | phospholipase C, gamma 2 [Source:ZFIN;Acc:ZDB-GENE-030131-9523]                                                                                       | 5.046474411 | 1.845473657  | -2.037113667  | 1.164373075  |
| ENSORLG00000008093  | TIPP            | tubulin polymerization promoting protein [Source:HGNC;Symbol:Acc:HGNC:24164]                                                                          | 5.183621658 | 2.003949204  | -0.924110241  | 2.256046111  |
| ENSORLG00000010460  | dna2            | DNA replication helicase/nuclease 2 [Source:ZFIN;Acc:ZDB-GENE-090313-71]                                                                              | 4.376331791 | 0.05102483   | -1.828518395  | 2.497273555  |
| ENSORLG00000000444  | -               | -                                                                                                                                                     | 4.339281164 | 0.763721084  | -1.003634409  | 2.572410957  |
| ENSORLG00000016612  | per2            | period circadian clock 2 [Source:ZFIN;Acc:ZDB-GENE-011220-2]                                                                                          | 5.313854703 | 2.487195932  | -1.761191093  | 1.065950775  |
| ENSORLG00000017252  | sg5a            | Sp5 transcription factor a [Source:ZFIN;Acc:ZDB-GENE-030430-2]                                                                                        | 3.854622414 | 1.223630565  | -0.623726426  | 2.007751114  |
| ENSORLG00000018128  | acsm4           | aminocarbonylmucronate semialdehyde decarboxylase [Source:NCBI;gene:Acc:101167833]                                                                    | 3.483897382 | -0.175893088 | -2.521470127  | 1.138807562  |
| ENSORLG00000005328  | -               | -                                                                                                                                                     | 4.076466801 | 1.451352472  | -0.92088892   | 1.704710328  |
| ENSORLG00000017498  | fam167b         | family with sequence similarity 167, member B [Source:ZFIN;Acc:ZDB-GENE-131121-390]                                                                   | 5.98629336  | 0.48115029   | -1.94544969   | 3.560177816  |
| ENSORLG00000003039  | lgalsla         | lectin, galactoside-binding-like a [Source:ZFIN;Acc:ZDB-GENE-060616-24]                                                                               | 3.265092155 | 2.108715631  | 1.172851719   | 2.329715141  |
| ENSORLG00000012839  | -               | -                                                                                                                                                     | 3.843282112 | 1.399190329  | -0.929638802  | 1.51493975   |
| ENSORLG00000004738  | -               | -                                                                                                                                                     | 6.929178457 | 4.027633263  | -1.782529296  | 1.119484043  |
| ENSORLG00000014423  | MAP3K20 (l)     | mitogen-activated protein kinase kinase kinase 20 [Source:HGNC;Symbol:Acc:HGNC:17397]                                                                 | 3.141210197 | 2.131800343  | -1.637192755  | -0.627297961 |
| ENSORLG00000016496  | ralgapan1       | ral guanine nucleotide dissociation stimulator like 1 [Source:NCBI;gene:Acc:101173538]                                                                | 3.894534186 | 2.324720839  | -1.765266455  | -0.204968328 |
| ENSORLG00000007896  | hoxc13a         | homeobox C13 [Source:NCBI;gene:Acc:101172814]                                                                                                         | 4.959853286 | -1.051186244 | -3.418377007  | 2.592947329  |
| ENSORLG00000015850  | RAP2B (1 of m)  | ras-related protein Rap-2b [Source:NCBI;gene:Acc:101168899]                                                                                           | 4.489416932 | 1.837983755  | 0.324805266   | 2.972731155  |
| ENSORLG00000014616  | -               | -                                                                                                                                                     | 4.360138781 | 1.2159544    | -1.873245201  | 1.27142199   |
| ENSORLG00000012266  | p51             | elastin-1 [Source:NCBI;gene:Acc:101168586]                                                                                                            | 4.707790283 | 0.194624432  | -3.452881586  | 1.050769847  |
| ENSORLG00000015080  | adcy9           | adenylylate cyclase 9 [Source:ZFIN;Acc:ZDB-GENE-050208-456]                                                                                           | 4.310015684 | 1.738868634  | -2.013310152  | 0.558321218  |
| ENSORLG00000010424  | ADAMTSL4        | ADAMTSL4 [Source:HGNC;Symbol:Acc:HGNC:19706]                                                                                                          | 4.009854285 | 2.28284395   | -2.632537275  | -0.895241821 |
| ENSORLG00000015547  | slc21l1-210c    | uncharacterized LOC101156655 [Source:NCBI;gene:Acc:101156655]                                                                                         | 3.454784658 | 0.333035528  | -1.505278853  | 1.616955445  |
| ENSORLG00000011420  | flrt2a          | flrtin 2a [Source:ZFIN;Acc:ZDB-GENE-020430-3]                                                                                                         | 4.018369917 | 1.627225072  | 0.473618607   | 2.865248538  |
| ENSORLG00000002662  | hlx1            | ALX homeobox 1 [Source:ZFIN;Acc:ZDB-GENE-050419-191]                                                                                                  | 6.668032981 | 1.482827642  | -1.191548238  | 3.994147461  |
| ENSORLG00000010152  | slc1key-40a16   | -                                                                                                                                                     | 5.872529451 | 1.721472199  | -3.528729587  | 0.622811846  |
| ENSORLG00000007513  | pad2 (1 of m)   | peptidyl arginine deiminase, type II [Source:ZFIN;Acc:ZDB-GENE-031116-67]                                                                             | 3.600621378 | 1.082378069  | -0.087558438  | 2.431169965  |
| ENSORLG00000006820  | tapbp2          | TAP binding protein (tapasin), tandem duplicate 2 [Source:ZFIN;Acc:ZDB-GENE-060503-136]                                                               | 3.614620974 | 0.501784518  | -1.09467227   | 2.018649344  |
| ENSORLG00000016491  | tcf21           | transcription factor 21 [Source:NCBI;gene:Acc:101172550]                                                                                              | 4.862042343 | 2.267957811  | -2.504920216  | 0.089649352  |
| ENSORLG00000017816  | adam23a         | ADAM metalloproteinase domain 23a [Source:ZFIN;Acc:ZDB-GENE-070810-2]                                                                                 | 5.360861445 | 4.166487422  | 1.114544917   | 2.309408574  |
| ENSORLG00000017867  | klhl6           | klch-like family member 6 [Source:ZFIN;Acc:ZDB-GENE-030616-325]                                                                                       | 3.55525357  | 1.332428982  | -1.15329744   | 1.070013114  |
| ENSORLG00000000582  | rtho            | ras homolog family member H [Source:ZFIN;Acc:ZDB-GENE-080228-7]                                                                                       | 16.26812344 | 13.18025262  | -3.024894484  | 0.063534741  |
| ENSORLG00000004009  | ra              | coagulation factor IIIa [Source:ZFIN;Acc:ZDB-GENE-071119-51]                                                                                          | 5.737660864 | 3.257996155  | 0.225247945   | 2.705396291  |
| ENSORLG000000009587 | ovalb1 (1 of m) | ovalbumin beta [Source:NCBI;gene:Acc:105353532]                                                                                                       | 5.926888408 | -0.566281851 | -7.240173716  | -0.746517906 |
| ENSORLG000000003117 | slc25a15a       | solute carrier family 25 (mitochondrial carrier, carnitine transporter) member 15a [Source:ZFIN;Acc:ZDB-GENE-070112-1072]                             | 4.15862002  | 0.232465212  | -0.989709698  | 2.936928998  |
| ENSORLG00000014284  | slc21l1-125m    | slc21l1-125m10.6 [Source:ZFIN;Acc:ZDB-GENE-120708-92]                                                                                                 | 4.111954558 | 1.965499092  | 0.587386643   | 2.734328839  |
| ENSORLG00000015530  | -               | -                                                                                                                                                     | 3.284623089 | 0.274466721  | -0.692731993  | 2.317909192  |
| ENSORLG00000011401  | bhlhe41         | Oryzias latipes basic helix-loop-helix family member e41 (bhlhe41), mRNA [Source:RefSeq; mRNA:Acc:NM_001104733]                                       | 3.073472956 | 1.141864928  | -1.936357817  | -0.004264842 |
| ENSORLG00000012348  | ogal            | O-GlcNAcase like [Source:ZFIN;Acc:ZDB-GENE-110914-153]                                                                                                | 3.278644908 | -1.099024771 | -3.455158196  | 0.922996118  |

|                     |                 |                                                                                                   |             |              |              |              |
|---------------------|-----------------|---------------------------------------------------------------------------------------------------|-------------|--------------|--------------|--------------|
| ENSORLG00000015048  | C2orf88         | chromosome 2 open reading frame 88 [Source:HGNC Symbol;Acc:HGNC:28191]                            | 3.535135819 | 0.854405847  | -0.482384765 | 2.198830061  |
| ENSORLG00000011088  | cpwm1b          | carboxypeptidase Y (M14 family), member 1b [Source:ZFIN;Acc:ZDB-GENE-141212-305]                  | 4.271181926 | 2.202590541  | -1.771672451 | 0.297403404  |
| ENSORLG00000010688  | rhoa            | ras homolog family member U [Source:NCBI gene;Acc:101157689]                                      | 3.939584267 | 1.202396241  | -0.256605178 | 2.481067755  |
| ENSORLG00000003905  | rip             | radioactive intestinal peptide [Source:ZFIN;Acc:ZDB-GENE-080204-3]                                | 16.35431947 | 13.33629176  | -1.99874761  | 1.019747849  |
| ENSORLG000000011149 | pgam2           | phosphoglycerate mutase 2 [Source:NCBI gene;Acc:101164987]                                        | 4.032974678 | -1.063991598 | -2.644438271 | 2.453014628  |
| ENSORLG00000012439  | cor9b           | chemokine (C-C motif) receptor 9b [Source:ZFIN;Acc:ZDB-GENE-070301-3]                             | 4.971399848 | -0.121162999 | -3.169039519 | 1.924009239  |
| ENSORLG00000011223  | -               | -                                                                                                 | 3.989595976 | 1.218777397  | 0.184919786  | 2.935583245  |
| ENSORLG00000005875  | rap2b           | RAP2B, member of RAS oncogene family [Source:NCBI gene;Acc:101171097]                             | 3.145284078 | 0.398047487  | -1.209149764 | 1.539571505  |
| ENSORLG00000017559  | -               | -                                                                                                 | 4.182752238 | 1.812160501  | -1.588771116 | 0.962300305  |
| ENSORLG00000022372  | rbp5            | retinol-binding protein 1 [Source:NCBI gene;Acc:101173969]                                        | 4.043980608 | 2.725087297  | -0.135419113 | 1.183959131  |
| ENSORLG000000011403 | si.ch211-283g   | si.ch211-283g.1 [Source:ZFIN;Acc:ZDB-GENE-060531-57]                                              | 4.724113005 | 0.106155063  | -1.888402664 | 2.730420286  |
| ENSORLG000000016003 | trmc2b          | transmembrane and tetrapeptide repeat containing 2b [Source:ZFIN;Acc:ZDB-GENE-081031-100]         | 4.366698524 | 2.133443846  | -1.311828083 | 0.921911304  |
| ENSORLG00000007701  | lam43a          | family with sequence similarity 43, member A [Source:ZFIN;Acc:ZDB-GENE-030131-6098]               | 5.223660451 | 2.585321436  | -0.973994235 | 1.664831089  |
| ENSORLG000000013410 | ca8             | carbonic anhydrase VIII [Source:ZFIN;Acc:ZDB-GENE-050417-28]                                      | 4.219175593 | 2.805951068  | 0.5873468    | 2.00105587   |
| ENSORLG000000011140 | lftahb          | lin bud initiation factor b [Source:ZFIN;Acc:ZDB-GENE-050417-423]                                 | 4.279080994 | 1.586945899  | -2.399753636 | 0.292865488  |
| ENSORLG00000014549  | -               | -                                                                                                 | 5.785538014 | 1.72045307   | -3.050232135 | 1.515281424  |
| ENSORLG000000014947 | proxa1          | prospero homeobox 1a [Source:ZFIN;Acc:ZDB-GENE-980526-397]                                        | 4.718422639 | -0.182825307 | -2.77442591  | 2.14288880   |
| ENSORLG00000004632  | smad5           | smad family member 5 [Source:ZFIN;Acc:ZDB-GENE-031202-1]                                          | 3.438425812 | 0.049220448  | -1.261002095 | 2.128689292  |
| ENSORLG00000002207  | SMAD3 (1 of 3)  | SMAD family member 3 [Source:HGNC Symbol;Acc:HGNC:6769]                                           | 5.026545179 | 1.660669315  | -0.455299120 | 2.911011173  |
| ENSORLG000000016766 | foxd2           | Oryzias latipes forkhead box D1 (LOC100302451), mRNA [Source:RefSeq mRNA;Acc:NM_001163182]        | 6.479888816 | 1.162143847  | -2.687519556 | 2.630710901  |
| ENSORLG00000013204  | sypl1           | synaptophysin-like 1 [Source:ZFIN;Acc:ZDB-GENE-110420-2]                                          | 4.162301837 | 1.828402605  | -0.60616575  | 1.72821796   |
| ENSORLG00000009593  | stil            | stil-like [Source:ZFIN;Acc:ZDB-GENE-081222-1]                                                     | 5.437087028 | -0.63719021  | -3.21717571  | 2.857713792  |
| ENSORLG000000021288 | RF00016         | small nucleolar RNA SNORD14 [Source:NCBI gene;Acc:11946368]                                       | 4.228693812 | 2.903699853  | 0.139203192  | 1.464681741  |
| ENSORLG000000016840 | shb             | Src homology 2 domain containing transforming protein D, h [Source:ZFIN;Acc:ZDB-GENE-030131-6059] | 3.507153889 | 0.483387053  | -3.208671168 | -0.18441982  |
| ENSORLG000000006251 | papss2a         | 5'-phosphatase 5'-phosphosulfate synthase 2a [Source:ZFIN;Acc:ZDB-GENE-061110-85]                 | 5.140574592 | 0.84977357   | -2.011986519 | 2.279300165  |
| ENSORLG000000013436 | col10a1a        | collagen, type X, alpha 1a [Source:ZFIN;Acc:ZDB-GENE-030131-8373]                                 | 8.251319674 | 3.937806087  | -5.523429373 | 0.790570277  |
| ENSORLG000000009008 | srpx            | sushi-repeat containing protein, X-linked [Source:ZFIN;Acc:ZDB-GENE-050327-43]                    | 4.505766182 | 1.889307079  | -2.189430471 | 0.42751395   |
| ENSORLG000000015829 | tnfrsf82b       | tumor necrosis factor, alpha-induced protein 8-like 2b [Source:ZFIN;Acc:ZDB-GENE-040476-1359]     | 3.917098428 | 1.333753311  | -2.011383465 | 0.572446434  |
| ENSORLG000000014002 | fam129ba        | family with sequence similarity 129, member 8a [Source:ZFIN;Acc:ZDB-GENE-070112-1222]             | 3.435131797 | 1.145744326  | -1.144526162 | 1.145346714  |
| ENSORLG000000006848 | -               | -                                                                                                 | 5.38091732  | 1.721918328  | -1.475902086 | 2.235802318  |
| ENSORLG000000016809 | lox2a           | lyal oxidase-like 2a [Source:ZFIN;Acc:ZDB-GENE-07018-11]                                          | 4.374687433 | 2.516249822  | -2.094504952 | -0.23582413  |
| ENSORLG000000001417 | -               | uncharacterized LOC101173999 [Source:NCBI gene;Acc:101173999]                                     | 6.406828857 | 1.541152052  | -2.694076791 | 2.172084239  |
| ENSORLG000000008863 | GN2             | G protein subunit gamma 2 [Source:NCBI gene;Acc:101157742]                                        | 4.310334323 | 2.232946204  | -1.758883426 | 0.318989638  |
| ENSORLG00000001089  | inka1a          | family with sequence similarity 212, member Aa [Source:ZFIN;Acc:ZDB-GENE-06012-186]               | 3.979052322 | 0.165002892  | -1.621506596 | 2.19302767   |
| ENSORLG000000007071 | coro2a          | coronin, actin binding protein, 2A [Source:ZFIN;Acc:ZDB-GENE-030131-2258]                         | 3.741887206 | 1.788436049  | -1.236629473 | 0.717306671  |
| ENSORLG000000018019 | tpm4b           | tropomyosin alpha-4 chain [Source:NCBI gene;Acc:101167740]                                        | 4.672978049 | 2.42033338   | -0.852006957 | 1.40112244   |
| ENSORLG000000011062 | gabrr2a         | gamma-aminobutyric acid receptor subunit rho-2-like [Source:NCBI gene;Acc:101164606]              | 5.342871269 | 1.426624949  | -0.465080365 | 3.165164983  |
| ENSORLG00000001319  | -               | -                                                                                                 | 9.366266781 | 2.78172817   | -4.317149118 | 2.26787163   |
| ENSORLG00000017356  | zgc:86896       | zgc:86896 [Source:ZFIN;Acc:ZDB-GENE-040625-80]                                                    | 4.484280539 | -0.56356529  | -3.11468693  | 1.934263781  |
| ENSORLG000000012039 | si.ch211-286b   | si.ch211-286b.5 [Source:ZFIN;Acc:ZDB-GENE-121214-209]                                             | 3.443724586 | 0.819401159  | -1.774669046 | 0.850139571  |
| ENSORLG000000005073 | -               | -                                                                                                 | 4.164943795 | 2.725591839  | -1.379538577 | 0.110298231  |
| ENSORLG000000008122 | trhb            | thyroid hormone receptor beta [Source:NCBI gene;Acc:10089254]                                     | 3.527145056 | 1.330954616  | -0.64338016  | 1.55295272   |
| ENSORLG000000002243 | IGFBP5 (1 of 3) | insulin like growth factor binding protein 5 [Source:HGNC Symbol;Acc:HGNC:5474]                   | 5.912456109 | 2.468647129  | -2.776980605 | 0.667318076  |
| ENSORLG000000013995 | zfpm1           | zinc finger protein, FOS family member 1 [Source:ZFIN;Acc:ZDB-GENE-050419-238]                    | 3.143551064 | 1.707995114  | -1.107952965 | 0.328087904  |
| ENSORLG00000017329  | -               | -                                                                                                 | 4.417170161 | 0.566194302  | -2.495190757 | 1.356811846  |
| ENSORLG000000009717 | NKAIN4          | sodium/potassium transporting ATPase interacting 4 [Source:HGNC Symbol;Acc:HGNC:16191]            | 3.628193229 | 1.97925106   | 0.281795513  | 1.931247793  |
| ENSORLG00000002553  | -               | -                                                                                                 | 4.168717423 | 1.834878032  | -0.296699366 | 2.037629477  |
| ENSORLG000000003035 | slit3           | slit homolog 3 (Drosophila) [Source:ZFIN;Acc:ZDB-GENE-010306-4]                                   | 3.605266511 | 1.652977809  | -2.26869169  | -0.315919149 |
| ENSORLG00000007905  | gnt2            | guanine nucleotide-binding protein G(I)/G(S)/G(T) subunit beta-2 [Source:NCBI gene;Acc:101175500] | 4.187512919 | 2.402464653  | -0.860634249 | 0.924899131  |
| ENSORLG000000010899 | he1             | -                                                                                                 | 4.1732171   | 1.933117102  | -1.192148201 | 1.048431343  |
| ENSORLG000000011513 | -               | -                                                                                                 | 3.909355271 | 1.46306674   | -1.140936075 | 1.297418727  |
| ENSORLG000000006388 | -               | -                                                                                                 | 3.829737987 | 1.447841988  | -1.445533875 | 2.178618384  |
| ENSORLG000000006937 | HGNL2           | fidestatin like 2 [Source:HGNC Symbol;Acc:HGNC:13287]                                             | 4.671267761 | 1.529833181  | -1.29581885  | 1.846102314  |
| ENSORLG00000011259  | -               | -                                                                                                 | 4.683073054 | 0.025954734  | -1.701243916 | 2.956362011  |
| ENSORLG000000008027 | opn3            | Oryzias latipes opsin 3 (opn3), mRNA [Source:RefSeq mRNA;Acc:NM_001305403]                        | 4.764979146 | 1.495383346  | -0.866651001 | 2.403727511  |
| ENSORLG000000017126 | lrp2a           | LDL receptor related protein 2 [Source:NCBI gene;Acc:101157655]                                   | 3.600712741 | 2.341408303  | -1.05083372  | 0.208955384  |
| ENSORLG000000030467 | -               | -                                                                                                 | 3.9304468   | 0.28570895   | -1.893010445 | 1.746120042  |
| ENSORLG000000007942 | how5a           | homeobox protein Hox-C5a [Source:NCBI gene;Acc:101174425]                                         | 4.654316632 | 1.085206844  | -2.982851166 | 0.586740533  |
| ENSORLG000000001921 | -               | -                                                                                                 | 16.35706176 | 13.53107924  | -3.783104659 | -0.936664704 |
| ENSORLG000000015114 | -               | upstream transcription factor 2, c-fos interacting [Source:NCBI gene;Acc:101157563]               | 3.498964743 | 1.56918218   | 0.055786507  | 1.985917974  |
| ENSORLG00000016601  | NFIX (1 of 3)   | nuclear factor X [Source:HGNC Symbol;Acc:HGNC:29841]                                              | 3.034110215 | 0.77163588   | -2.957987819 | 0.68502602   |
| ENSORLG00000008780  | -               | -                                                                                                 | 3.00287353  | 0.423926224  | 0.281381013  | 2.860756728  |
| ENSORLG000000005089 | sb.zf81         | sb.zf81 [Source:ZFIN;Acc:ZDB-GENE-030131-9939]                                                    | 6.468245008 | 2.633858247  | -2.93702322  | 0.897849593  |
| ENSORLG000000010849 | SyDE2           | synapse defective rho G1 Fse homolog 2 [Source:HGNC Symbol;Acc:HGNC:29841]                        | 3.100736339 | 1.851022251  | -0.269715465 | 0.980483386  |
| ENSORLG000000014820 | trmc2a          | transmembrane and tetrapeptide repeat containing 2a [Source:ZFIN;Acc:ZDB-GENE-041210-299]         | 4.653672733 | 1.715463311  | -1.018768292 | 1.919928414  |
| ENSORLG000000010504 | qr85            | G protein-coupled receptor 85 [Source:ZFIN;Acc:ZDB-GENE-000710-2]                                 | 3.268033763 | 1.069980928  | -0.556372434 | 1.642166779  |
| ENSORLG00000004209  | lrga3b          | integrin, alpha 3b [Source:ZFIN;Acc:ZDB-GENE-050411-55]                                           | 3.07246717  | 0.30235454   | -1.61174513  | 1.15885274   |
| ENSORLG000000009759 | -               | -                                                                                                 | 5.191602238 | 3.239079201  | -0.511990815 | 1.441016931  |
| ENSORLG000000005110 | si.ch211-248a   | si.ch211-248a1.4.8 [Source:ZFIN;Acc:ZDB-GENE-131126-33]                                           | 6.505734281 | -1.139569607 | -5.229975916 | 2.415822395  |

|                     |                  |                                                                                                                                               |             |              |              |              |
|---------------------|------------------|-----------------------------------------------------------------------------------------------------------------------------------------------|-------------|--------------|--------------|--------------|
| ENSORLG00000017782  | lmp3             | bone morphogenetic protein 3 [Source:ZFIN;Acc:ZDB-GENE-030131-7192]                                                                           | 3.089580896 | 1.884533243  | -2.270578687 | -1.065045061 |
| ENSORLG00000017737  | lpc-113531       | lpc-113531 [Source:ZFIN;Acc:ZDB-GENE-050320-52]                                                                                               | 3.825489067 | 2.067083597  | -1.803375347 | -0.04448507  |
| ENSORLG00000016128  | lptma            | protein tyrosine phosphatase, receptor type, Na [Source:ZFIN;Acc:ZDB-GENE-030131-3511]                                                        | 3.897617267 | 0.859071386  | -1.99054886  | 1.048481498  |
| ENSORLG00000015091  | lpto2b           | neopilin (NRP) and telokin (TL1)-like 2b [Source:ZFIN;Acc:ZDB-GENE-060503-638]                                                                | 3.525863123 | -1.178433242 | -1.311631979 | 3.393144814  |
| ENSORLG00000008253  | -                | integral membrane protein 2B [Source:NCBI;gene:Acc:101159208]                                                                                 | 4.34866932  | 0.945932365  | -0.43139416  | 2.972824325  |
| ENSORLG00000013506  | lrm35-28         | tripeptide motif containing 35-28 [Source:ZFIN;Acc:ZDB-GENE-071004-19]                                                                        | 3.215178403 | 0.803973507  | -1.164629304 | 1.24706043   |
| ENSORLG00000007274  | -                | -                                                                                                                                             | 3.448862706 | 1.460899714  | 1.082045521  | 2.084028842  |
| ENSORLG00000013893  | -                | -                                                                                                                                             | 3.23742671  | 1.011584831  | -3.10889421  | -0.892925604 |
| ENSORLG00000000859  | gla              | galactosidase, alpha [Source:ZFIN;Acc:ZDB-GENE-041010-207]                                                                                    | 6.184978566 | 2.537292726  | -1.889050289 | 1.760120613  |
| ENSORLG00000010035  | lor1             | sortilin-related receptor, (LDLR class) A repeats containing [Source:ZFIN;Acc:ZDB-GENE-050208-22]                                             | 3.850349011 | 0.474372133  | -0.829668858 | 2.54679217   |
| ENSORLG00000000044  | lcor             | ligand dependent nuclear receptor corepressor [Source:ZFIN;Acc:ZDB-GENE-061201-6]                                                             | 4.706256972 | 1.634427619  | -3.062813612 | 0.009500982  |
| ENSORLG00000010563  | neurod1          | neuronal differentiation 1 [Source:ZFIN;Acc:ZDB-GENE-990415-172]                                                                              | 4.846487888 | -0.982146533 | -1.454662597 | 4.37444934   |
| ENSORLG00000015279  | nr4a1            | nuclear receptor subfamily 4 group A member 1 [Source:NCBI;gene:Acc:101175402]                                                                | 16.50913014 | 10.81534326  | -1.063812998 | 4.630441331  |
| ENSORLG00000001064  | MMP23B           | matrix metalloproteinase 23B [Source:HGNC;Symbol:Acc:HGNC:71711]                                                                              | 4.07650745  | 1.929700436  | -2.21698184  | -0.06969012  |
| ENSORLG00000009016  | WDFY4            | WDFY family member 4 [Source:HGNC;Symbol:Acc:HGNC:29323]                                                                                      | 3.370878576 | 2.449874331  | 0.618288523  | 1.539777324  |
| ENSORLG00000000386  | wdr45            | WD repeat domain 45 [Source:NCBI;gene:Acc:101160923]                                                                                          | 3.186911631 | 0.326805366  | -1.197467961 | 1.663123304  |
| ENSORLG00000004106  | wlx4b            | homeobox protein Dlx4b [Source:NCBI;gene:Acc:101157253]                                                                                       | 6.56101539  | 0.487802331  | -1.867183556 | 4.206513686  |
| ENSORLG00000011451  | aspdh            | aspartate dehydrogenase domain containing [Source:NCBI;gene:Acc:101155692]                                                                    | 6.147647262 | -10.78902821 | -2.810723704 | 14.12646814  |
| ENSORLG00000007831  | -                | -                                                                                                                                             | 4.363906154 | 2.370345568  | -0.784264579 | 1.199781531  |
| ENSORLG00000002829  | -                | -                                                                                                                                             | 5.074466803 | 3.098064128  | -2.877011586 | -0.900126193 |
| ENSORLG00000009332  | cdk17            | cyclin-dependent kinase 17 [Source:ZFIN;Acc:ZDB-GENE-041210-15]                                                                               | 3.790375387 | 1.477358535  | -0.10291719  | 2.305212097  |
| ENSORLG00000016577  | tspan35          | tetraspanin-1 [Source:NCBI;gene:Acc:101164063]                                                                                                | 16.51301477 | 14.68168973  | -1.689923465 | 0.141868806  |
| ENSORLG00000018018  | lymb             | lysine-protein kinase fyn [Source:NCBI;gene:Acc:101167011]                                                                                    | 3.886988119 | 1.173821342  | -1.420880593 | 1.292770749  |
| ENSORLG00000004239  | erfl1a           | ERBB receptor feedback inhibitor 1a [Source:ZFIN;Acc:ZDB-GENE-030131-6256]                                                                    | 4.539676449 | 1.049441294  | -1.150362447 | 2.34058213   |
| ENSORLG00000006924  | lrf1             | lymphoid enhancer binding factor 1 [Source:NCBI;gene:Acc:101167344]                                                                           | 3.368269797 | 2.73401013   | -1.62069018  | -0.825336594 |
| ENSORLG00000000417  | -                | -                                                                                                                                             | 4.115372164 | 1.980415595  | 0.711979957  | 2.847421041  |
| ENSORLG00000001328  | GLI2             | GLI family zinc finger 2 [Source:HGNC;Symbol:Acc:HGNC:4318]                                                                                   | 3.885008927 | 1.307922896  | -1.761086304 | 0.816484796  |
| ENSORLG00000011013  | cdkn1d           | cyclin-dependent kinase inhibitor 1D [Source:ZFIN;Acc:ZDB-GENE-110215-1]                                                                      | 4.454353512 | 1.438416957  | -2.40097007  | 0.615484487  |
| ENSORLG00000014059  | slc1key-11018    | slc1key-11018.5 [Source:ZFIN;Acc:ZDB-GENE-091204-110]                                                                                         | 3.142778906 | 0.095800588  | -2.904322396 | 0.15314154   |
| ENSORLG00000016724  | CYT11            | cytochrome like 1 [Source:HGNC;Symbol:Acc:HGNC:24433]                                                                                         | 4.494853114 | 2.736907537  | -2.315784192 | -0.557353708 |
| ENSORLG00000006116  | -                | -                                                                                                                                             | 3.203471015 | 0.239563177  | -1.997201917 | 0.967196569  |
| ENSORLG00000010381  | arid3a           | arrestin domain containing 3a [Source:ZFIN;Acc:ZDB-GENE-030131-2913]                                                                          | 3.031404481 | 0.667870604  | -1.053765497 | 1.310253436  |
| ENSORLG000000005170 | adamts16         | ADAM metalloproteinase with thrombospondin type 1 motif 16 [Source:ZFIN;Acc:ZDB-GENE-130530-760]                                              | 4.093660174 | 0.77166235   | -0.73518961  | 2.587291597  |
| ENSORLG00000016607  | gpr182           | G protein-coupled receptor 182 [Source:ZFIN;Acc:ZDB-GENE-030131-2281]                                                                         | 4.001093415 | 0.582986678  | -4.129129214 | -0.710539184 |
| ENSORLG00000011437  | palm1b           | paralemmin 1b [Source:ZFIN;Acc:ZDB-GENE-040426-1147]                                                                                          | 3.692382653 | 1.539104898  | -0.689029382 | 1.464732834  |
| ENSORLG00000003577  | -                | -                                                                                                                                             | 3.518497147 | 2.627812059  | -3.221567067 | -2.332396092 |
| ENSORLG00000007597  | hoxa13b          | homeobox protein Hox-A13b [Source:NCBI;gene:Acc:101158301]                                                                                    | 3.248963728 | -0.009230817 | -3.419839615 | -0.163195958 |
| ENSORLG00000000830  | prodhb           | proline dehydrogenase (oxidase) 1b [Source:ZFIN;Acc:ZDB-GENE-101116-1]                                                                        | 5.986990298 | 1.873682933  | -2.434917568 | 1.678867828  |
| ENSORLG00000007524  | sh3c2            | SH3 domain and tetratricopeptide repeats 2 [Source:ZFIN;Acc:ZDB-GENE-061104-347]                                                              | 3.554517673 | 1.973960176  | -0.461557863 | 1.119485803  |
| ENSORLG00000000502  | angpt7           | angiotensin-like 7 [Source:ZFIN;Acc:ZDB-GENE-041010-175]                                                                                      | 3.864282154 | 0.006547595  | -1.255722833 | 2.602475363  |
| ENSORLG00000005884  | -                | -                                                                                                                                             | 4.880611915 | 2.412227635  | -2.334355062 | 0.134514187  |
| ENSORLG00000013932  | slc6a4a          | solute carrier family 6 (neurotransmitter transporter), member 4a [Source:ZFIN;Acc:ZDB-GENE-060314-1]                                         | 6.26110213  | 2.667396477  | -1.54419831  | 2.049990592  |
| ENSORLG00000016819  | errg2            | Oryzias latipes estrogen-related receptor gamma type 2 (errg2), mRNA [Source:RefSeq; mRNA:Acc:NM_001630921]                                   | 4.21523115  | 0.835459377  | -3.447870319 | -0.067613644 |
| ENSORLG00000014173  | sema3ga          | sema domain, immunoglobulin domain (Ig), short basic domain, secreted (semaphorin) 3ga [Source:ZFIN;Acc:ZDB-GENE-050513-3]                    | 7.422530852 | 4.317806364  | -1.265918506 | 1.839272953  |
| ENSORLG00000012878  | igfbp1a          | insulin-like growth factor binding protein 1a [Source:ZFIN;Acc:ZDB-GENE-021231-11]                                                            | 3.577059663 | 1.379049464  | -2.760675216 | -0.562379602 |
| ENSORLG00000004717  | nrx1a            | neuroligin 1a [Source:ZFIN;Acc:ZDB-GENE-030519-2]                                                                                             | 3.788519723 | 1.814491539  | -2.237968506 | -0.26345134  |
| ENSORLG00000009648  | PLCB4            | phospholipase C beta 4 [Source:HGNC;Symbol:Acc:HGNC:9059]                                                                                     | 3.713236316 | 0.912255556  | -1.249854282 | 1.551612307  |
| ENSORLG00000009950  | usp12b           | ubiquitin specific peptidase 12b [Source:ZFIN;Acc:ZDB-GENE-100209-4]                                                                          | 3.69089955  | 2.19118712   | -0.737916604 | 0.762281359  |
| ENSORLG00000011632  | map4k2           | mitogen-activated protein kinase kinase kinase 2 [Source:ZFIN;Acc:ZDB-GENE-030816-163]                                                        | 3.193496145 | 1.191884091  | 0.851394383  | 2.853491219  |
| ENSORLG00000012050  | slc1a1           | solute carrier family 1 (neuronal/epithelial high affinity glutamate transporter, system Xag), member 1 [Source:ZFIN;Acc:ZDB-GENE-040718-414] | 5.12811671  | 0.521278599  | -3.155361974 | 1.451959586  |
| ENSORLG00000018045  | sggp1            | sphingosine-1-phosphate phosphatase 1 [Source:NCBI;gene:Acc:101173595]                                                                        | 3.922684421 | 1.309350175  | -1.404895338 | 1.208923488  |
| ENSORLG00000014982  | tlrb1            | tlrb1-like 1 [Source:ZFIN;Acc:ZDB-GENE-070705-2]                                                                                              | 4.727392383 | 1.627296919  | -2.07362982  | 1.026950861  |
| ENSORLG00000010043  | tebp1            | AT binding protein 1 [Source:ZFIN;Acc:ZDB-GENE-030131-2390]                                                                                   | 3.274901691 | 2.221856237  | -1.683842674 | -0.630312434 |
| ENSORLG00000009111  | TGFbeta3 (1 of m | transforming growth factor beta 3 [Source:HGNC;Symbol:Acc:HGNC:11768]                                                                         | 7.842295889 | 2.147548821  | -2.44967092  | 3.245570971  |
| ENSORLG00000002708  | yap1             | Yes-associated protein 1 [Source:ZFIN;Acc:ZDB-GENE-030131-9710]                                                                               | 4.545378991 | 1.42683095   | -1.173991885 | 1.945141138  |
| ENSORLG00000006715  | scap1            | ARF-GAP with coiled-coil, ankyrin repeat and PH domains 1 [Source:ZFIN;Acc:ZDB-GENE-070112-1242]                                              | 4.227540843 | 1.809140017  | -1.580127477 | 0.838758771  |
| ENSORLG00000011984  | trmem267         | transmembrane protein 267 [Source:NCBI;gene:Acc:101188970]                                                                                    | 3.066815753 | 0.907364269  | 0.100334172  | 2.260270923  |
| ENSORLG00000005747  | pa2a             | growth arrest-specific 2a [Source:ZFIN;Acc:ZDB-GENE-091013-1]                                                                                 | 3.019984021 | 1.202236153  | -1.277705476 | 0.540526896  |
| ENSORLG00000013803  | -                | -                                                                                                                                             | 3.37170180  | 0.682861557  | -0.289920789 | 2.845572532  |
| ENSORLG00000012936  | STMN2            | stathmin 2 [Source:NCBI;gene:Acc:101167833]                                                                                                   | 3.681053466 | -1.749241123 | -1.458607769 | 3.97417162   |
| ENSORLG00000011963  | -                | -                                                                                                                                             | 3.950703277 | 1.032068973  | -0.749918063 | 2.169201221  |
| ENSORLG00000013231  | pa345ba          | growth arrest and DNA damage inducible beta [Source:NCBI;gene:Acc:101165223]                                                                  | 6.290887289 | 2.254651089  | -1.922800702 | 2.113921147  |
| ENSORLG00000009061  | batf             | basic leucine zipper ATF-like transcription factor [Source:NCBI;gene:Acc:101168259]                                                           | 4.098489244 | -0.299593968 | -4.899677028 | -0.501107495 |
| ENSORLG00000005094  | nk42b            | MK4/myocardin-like 2b [Source:ZFIN;Acc:ZDB-GENE-030619-16]                                                                                    | 5.337820122 | 2.986360799  | -1.478266431 | 1.261677367  |
| ENSORLG00000014427  | -                | -                                                                                                                                             | 6.008456555 | 3.16957661   | -1.490405921 | 1.34895362   |
| ENSORLG00000013732  | -                | -                                                                                                                                             | 4.688784687 | 1.203737583  | -2.581421729 | 0.904109866  |

|  |                     |                |                                                                                                                                                                 |             |              |              |              |
|--|---------------------|----------------|-----------------------------------------------------------------------------------------------------------------------------------------------------------------|-------------|--------------|--------------|--------------|
|  | ENSORLG00000017443  | pyva           | peptide YYa [Source:ZFIN;Acc:ZDB-GENE-980526-71]                                                                                                                | 16.45547444 | 12.62655777  | -1.356472102 | 2.472911241  |
|  | ENSORLG00000012150  | si.ch211-9419  | mvoan ID [Source:HGNC;Symbol:Acc:HGNC:7598]                                                                                                                     | 3.02899265  | 0.606936041  | -1.114492392 | 1.308015024  |
|  | ENSORLG00000001481  | ker18          | keratin, type I cytoskeletal 18 [Source:NCBI;gene:Acc:101168952]                                                                                                | 4.850501755 | 2.510799378  | -0.2163917   | 2.123795665  |
|  | ENSORLG00000004100  | -              | -                                                                                                                                                               | 4.267511435 | 3.133652771  | -0.940321954 | 0.194020073  |
|  | ENSORLG00000006846  | si.dkey-33c9.6 | si.dkey-33c9.6 [Source:ZFIN;Acc:ZDB-GENE-130530-592]                                                                                                            | 5.507517836 | 2.869592796  | -2.782979603 | -0.144571185 |
|  | ENSORLG00000002432  | myl23          | myosin, light polypeptide 3, skeletal muscle [Source:ZFIN;Acc:ZDB-GENE-000372-6]                                                                                | 5.402077038 | -1.397813519 | -5.748199985 | 1.052216425  |
|  | ENSORLG00000006389  | mvo10          | mvoan X [Source:ZFIN;Acc:ZDB-GENE-070912-277]                                                                                                                   | 3.342240994 | 0.236802091  | -1.789325323 | 1.316597834  |
|  | ENSORLG00000003417  | -              | -                                                                                                                                                               | 4.136938909 | 2.20093607   | -1.237152514 | 0.699334968  |
|  | ENSORLG000000015524 | arhgap25       | Rho GTPase activating protein 25 [Source:ZFIN;Acc:ZDB-GENE-080526-210]                                                                                          | 4.429672168 | 1.684297379  | -2.776718286 | -0.030857105 |
|  | ENSORLG00000006372  | -              | -                                                                                                                                                               | 4.084726365 | 0.550045476  | -1.76836013  | 1.768805524  |
|  | ENSORLG00000004723  | tyrp1b         | 5,6-dihydroxyindole-2-carboxylic acid oxidase-like [Source:NCBI;gene:Acc:101161292]                                                                             | 5.682312292 | 1.124736006  | -2.771299632 | 1.786761218  |
|  | ENSORLG000000015054 | slc7a10a       | solute carrier family 7 (neutral amino acid transporter light chain, asc system), member 10a [Source:ZFIN;Acc:ZDB-GENE-080116-11]                               | 3.930482435 | 0.665494019  | -2.117011291 | 1.148462     |
|  | ENSORLG000000012362 | -              | -                                                                                                                                                               | 5.94225255  | 0.550525372  | -2.953010565 | 2.439147578  |
|  | ENSORLG00000007559  | -              | -                                                                                                                                                               | 4.195968884 | 1.443437716  | -0.97667789  | 1.776338213  |
|  | ENSORLG000000010896 | caonb2a        | calcium channel, voltage-dependent, beta 2a [Source:ZFIN;Acc:ZDB-GENE-080808-7]                                                                                 | 3.614404716 | 1.662282348  | -0.247394    | 1.705213725  |
|  | ENSORLG000000010223 | cp11b          | carotene palmitoyltransferase 1B (muscle) [Source:ZFIN;Acc:ZDB-GENE-041010-8]                                                                                   | 8.134984929 | 3.439354748  | -3.733687758 | 0.962367438  |
|  | ENSORLG00000017706  | -              | -                                                                                                                                                               | 16.19307637 | 9.747504889  | -16.19307117 | -9.747521673 |
|  | ENSORLG000000014672 | srbf2          | steroid regulatory element binding transcription factor 2 [Source:ZFIN;Acc:ZDB-GENE-070410-8]                                                                   | 3.508790389 | 0.550616747  | -1.574471197 | 1.384187606  |
|  | ENSORLG000000006825 | smad6b         | SMAD family member 6b [Source:ZFIN;Acc:ZDB-GENE-050419-196]                                                                                                     | 4.582125765 | 0.932913066  | -1.443453948 | 2.206243705  |
|  | ENSORLG000000008238 | gamt           | guanineacetate N-methyltransferase [Source:NCBI;gene:Acc:101166292]                                                                                             | 5.694387284 | 0.990345661  | -3.674361432 | 1.030165187  |
|  | ENSORLG000000016055 | ADORA1         | adenosine A1 receptor [Source:HGNC;Symbol:Acc:HGNC:287]                                                                                                         | 4.526309257 | 1.971708423  | -1.32940924  | 1.225680185  |
|  | ENSORLG000000011360 | lmo7a          | LIM domain 7a [Source:ZFIN;Acc:ZDB-GENE-030219-solute carrier family 29 (equilibrative nucleoside transporter), member 1a [Source:ZFIN;Acc:ZDB-GENE-050913-138] | 4.508328551 | -0.152425367 | -1.757553705 | 2.901885312  |
|  | ENSORLG00000004888  | slc29a1a       | solute carrier family 29 (equilibrative nucleoside transporter), member 1a [Source:ZFIN;Acc:ZDB-GENE-050913-138]                                                | 3.851521645 | 1.148285172  | -0.80667459  | 1.897046842  |
|  | ENSORLG000000013509 | -              | -                                                                                                                                                               | 3.613571996 | 0.813002705  | -0.355706688 | 2.445347781  |
|  | ENSORLG000000013721 | mao            | monoamine oxidase [Source:ZFIN;Acc:ZDB-GENE-040328-3]                                                                                                           | 3.523591949 | 2.312388013  | -2.325250064 | -1.113561146 |
|  | ENSORLG000000006273 | ppp5f5b        | inositol polyphosphate-5-phosphatase 5b [Source:ZFIN;Acc:ZDB-GENE-081104-46]                                                                                    | 3.906322843 | 1.706251757  | -0.576903727 | 1.623651739  |
|  | ENSORLG000000003376 | znc110333      | Znfx110333 [Source:ZFIN;Acc:ZDB-GENE-050417-331]                                                                                                                | 17.20671029 | 11.27188317  | -2.74501251  | 3.18079392   |
|  | ENSORLG000000012903 | znc110332      | zinc finger protein 3, tandem duplicate 2 [Source:ZFIN;Acc:ZDB-GENE-081031-95]                                                                                  | 3.152661302 | 1.442479875  | -1.02113898  | 0.689527697  |
|  | ENSORLG000000017224 | sg12l1         | Oryzias latipes interferon alpha-inducible protein 27, mitochondrial-like (sg12l1), mRNA [Source:RefSeq; mRNA:Acc:NM_001278818]                                 | 3.181570772 | 2.041828131  | 0.681981242  | 1.822208441  |
|  | ENSORLG000000016264 | slc34a2b       | sodium-dependent phosphate transport protein 2B [Source:NCBI;gene:Acc:10117337]                                                                                 | 5.602935427 | 0.719351834  | -2.602973957 | 2.281095277  |
|  | ENSORLG000000007059 | dao2           | D-amino-acid oxidase, tandem duplicate 2 [Source:ZFIN;Acc:ZDB-GENE-040476-2634]                                                                                 | 5.497121089 | 0.916152201  | -1.589242416 | 2.99221147   |
|  | ENSORLG000000017976 | se             | serpin family B member 1 [Source:NCBI;gene:Acc:101165527]                                                                                                       | 3.313086715 | 1.512812813  | -1.22753483  | 0.573223673  |
|  | ENSORLG00000002603  | ker222         | keratin 222 [Source:ZFIN;Acc:ZDB-GENE-070912-343]                                                                                                               | 15.81300458 | 12.45453578  | -2.205634672 | 1.153320138  |
|  | ENSORLG000000005407 | KLF3           | Kruppel like factor 3 [Source:HGNC;Symbol:Acc:HGNC:16516]                                                                                                       | 3.052009181 | 0.142563229  | -1.822400555 | 1.087530273  |
|  | ENSORLG000000005296 | angptl4        | angiopoietin-like 4 [Source:ZFIN;Acc:ZDB-GENE-041111-222]                                                                                                       | 5.003270384 | 2.275079891  | -1.449896036 | 1.278780226  |
|  | ENSORLG000000016187 | HHI            | human histone H [Source:HGNC;Symbol:Acc:HGNC:1141]                                                                                                              | 5.250547025 | -0.180140799 | -3.038677422 | 2.392495264  |
|  | ENSORLG000000004013 | twsg1a         | twisted gastrulation BMP signaling modulator 1 [Source:NCBI;gene:Acc:101172607]                                                                                 | 3.881589304 | 2.165381876  | -1.097988229 | 0.618704117  |
|  | ENSORLG000000013847 | knq2a          | inward rectifier potassium channel 2 [Source:NCBI;gene:Acc:101173391]                                                                                           | 3.621356149 | 1.558335581  | -1.609555495 | 0.453948066  |
|  | ENSORLG000000008140 | nenf           | neurexin neurotrophic factor [Source:NCBI;gene:Acc:101158154]                                                                                                   | 4.774939673 | 2.686210852  | 0.23904024   | 2.328253414  |
|  | ENSORLG000000010888 | h2ahy2         | H2A histone family, member Y2 [Source:ZFIN;Acc:ZDB-GENE-050913-114]                                                                                             | 3.701083622 | 0.56816011   | -0.361204323 | 2.772203964  |
|  | ENSORLG000000008263 | anr1b          | anion channel 1B [Source:ZFIN;Acc:ZDB-GENE-070912-2]                                                                                                            | 3.084533589 | 2.20302041   | -2.246388999 | -0.35433072  |
|  | ENSORLG000000006421 | -              | -                                                                                                                                                               | 5.038384624 | -0.674263864 | -4.580333358 | 1.3283015    |
|  | ENSORLG000000017246 | -              | -                                                                                                                                                               | 7.605588836 | 1.790998806  | -6.529461192 | -0.714386673 |
|  | ENSORLG000000004646 | rimk1a         | ribosomal modification protein rimk-like family member A [Source:ZFIN;Acc:ZDB-GENE-040912-29]                                                                   | 4.283700816 | 1.790173797  | -0.603951318 | 1.890060848  |
|  | ENSORLG000000013012 | ph2            | PHD finger protein 2 [Source:ZFIN;Acc:ZDB-GENE-050302-10]                                                                                                       | 3.628216111 | 0.887086623  | -0.662611808 | 2.079048215  |
|  | ENSORLG000000010337 | skv1b1         | skp1-keto reductase family 1, member B1 (aldose reductase) [Source:ZFIN;Acc:ZDB-GENE-040625-7]                                                                  | 5.114969334 | 0.167743529  | -2.37907411  | 2.568636412  |
|  | ENSORLG000000010577 | spag9a         | sperm associated antigen 9a [Source:ZFIN;Acc:ZDB-GENE-070820-7]                                                                                                 | 4.908692437 | 2.155229412  | -0.72962196  | 2.024322173  |
|  | ENSORLG000000017480 | -              | -                                                                                                                                                               | 6.054135127 | 4.322833359  | -2.493885633 | -0.762098982 |
|  | ENSORLG000000005833 | -              | -                                                                                                                                                               | 4.24956813  | 2.457526183  | -0.248871351 | 1.543654733  |
|  | ENSORLG000000000268 | -              | -                                                                                                                                                               | 3.627490471 | 1.034728241  | 0.288222354  | 2.881469456  |
|  | ENSORLG000000014809 | -              | -                                                                                                                                                               | 3.885279994 | 0.32942374   | -1.129650404 | 2.426641294  |
|  | ENSORLG000000005880 | wnt2ba         | wingless-type MMTV integration site family, member 2Ba [Source:ZFIN;Acc:ZDB-GENE-030717-2]                                                                      | 6.623956743 | 2.65449191   | -2.023238707 | 1.946709897  |
|  | ENSORLG000000006089 | -              | -                                                                                                                                                               | 5.2361888   | 2.141735029  | -1.51071275  | 1.563867427  |
|  | ENSORLG000000012231 | -              | -                                                                                                                                                               | 3.543541877 | 1.16574021   | -0.587333164 | 1.799544460  |
|  | ENSORLG000000004915 | ctf4a          | CTD74 molecule [Source:NCBI;gene:Acc:101158776]                                                                                                                 | 5.231951564 | 2.57876626   | -2.533766462 | 0.098964661  |
|  | ENSORLG000000014109 | abca1a         | ATP-binding cassette, sub-family A (ABC1), member 1A [Source:ZFIN;Acc:ZDB-GENE-031006-12]                                                                       | 3.415317728 | 1.454090485  | -0.421204107 | 1.540517628  |
|  | ENSORLG000000002227 | smad6a         | SMAD family member 6a [Source:ZFIN;Acc:ZDB-GENE-011015-1]                                                                                                       | 4.699180449 | 0.765481779  | -1.619605712 | 2.314578273  |
|  | ENSORLG000000005581 | -              | -                                                                                                                                                               | 5.641137516 | 1.270842636  | -1.812115136 | 2.556664833  |
|  | ENSORLG000000007617 | hwa10b         | homeobox protein Hox-A11b [Source:NCBI;gene:Acc:101158794]                                                                                                      | 3.744986933 | 0.735500592  | -2.27324389  | 0.736726449  |
|  | ENSORLG000000002005 | NRP1 (1 of 3)  | neuropilin 1 [Source:HGNC;Symbol:Acc:HGNC:8004]                                                                                                                 | 3.89614831  | 1.544897309  | -1.994615897 | -0.149413864 |
|  | ENSORLG000000008341 | cdc4b          | phosphodiesterase 4C, cAMP-specific b [Source:ZFIN;Acc:ZDB-GENE-030131-4075]                                                                                    | 3.394468826 | 0.843943396  | -1.066175095 | 1.484833009  |
|  | ENSORLG000000017462 | zak            | sterile alpha motif and leucine zipper containing kinase AZK [Source:ZFIN;Acc:ZDB-GENE-070912-386]                                                              | 4.922693995 | 2.218853031  | -0.575081004 | 2.129246057  |
|  | ENSORLG000000010047 | -              | -                                                                                                                                                               | 4.55216777  | 2.595311892  | -1.339690788 | 0.620432872  |
|  | ENSORLG000000002943 | cltn11b        | claudin 11b [Source:ZFIN;Acc:ZDB-GENE-010328-13]                                                                                                                | 18.28213443 | 0            | -4.557981041 | 13.72464494  |
|  | ENSORLG000000003829 | ptger4b        | prostaglandin E receptor 4 (subtype EP4) b [Source:ZFIN;Acc:ZDB-GENE-060531-102]                                                                                | 4.96939269  | 0.902533535  | -3.449056394 | 0.618287389  |
|  | ENSORLG000000010012 | PRDX6          | peroxiredoxin 6 [Source:HGNC;Symbol:Acc:HGNC:10012]                                                                                                             | 4.577111041 | 0.347253733  | -2.45972322  | 1.77061878   |
|  | ENSORLG000000008569 | proxa          | protein X, vitamin K-dependent plasma glycoprotein a [Source:ZFIN;Acc:ZDB-GENE-061013-403]                                                                      | 3.873659007 | 1.707228581  | 0.199696889  | 2.366612413  |
|  | ENSORLG000000017475 | snai2          | snail family transcriptional repressor 2 [Source:NCBI;gene:Acc:101173257]                                                                                       | 3.783857967 | 1.442333815  | -1.648379507 | 0.693628938  |
|  | ENSORLG000000016383 | -              | -                                                                                                                                                               | 5.585278806 | 3.424164647  | -1.481773971 | 0.680108118  |
|  | ENSORLG000000016417 | -              | -                                                                                                                                                               | 3.807748821 | 2.541156127  | -0.346864952 | 1.6073883123 |
|  | ENSORLG000000006367 | aldoa          | fructose-bisphosphate aldolase A [Source:NCBI;gene:Acc:10049249]                                                                                                | 3.92921249  | 1.121857103  | -0.722496085 | 2.08534436   |

|                    |               |                                                                                                                                           |             |              |              |              |
|--------------------|---------------|-------------------------------------------------------------------------------------------------------------------------------------------|-------------|--------------|--------------|--------------|
| ENSORLG00000014384 | iqsec2b       | IQ motif and Sec7 domain 2b [Source:ZFIN;Acc:ZDB-GENE-081105-73]                                                                          | 4.799091026 | 2.170266976  | -0.544278399 | 2.085030313  |
| ENSORLG00000016536 | -             | -                                                                                                                                         | 5.328912183 | 2.682673419  | -2.668914864 | -0.024140956 |
| ENSORLG00000006759 | -             | -                                                                                                                                         | 5.178147663 | 2.472157643  | -1.53473967  | 1.171699781  |
| ENSORLG00000008769 | sic5a2        | solute carrier family 5 (sodium/glucose cotransporter), member 2 [Source:ZFIN;Acc:ZDB-GENE-040426-2498]                                   | 6.037200971 | 1.129266941  | -4.38390455  | 0.52448558   |
| ENSORLG00000008332 | frp2          | secreted frizzled-related protein 2 [Source:ZFIN;Acc:ZDB-GENE-061013-293]                                                                 | 5.316925473 | 0.867469437  | -1.567923456 | 2.882027203  |
| ENSORLG00000012630 | -             | -                                                                                                                                         | 3.700961246 | 0.822585797  | -1.613069054 | 1.265726346  |
| ENSORLG00000011596 | si.ch211-15b1 | si.ch211-15b10.6 [Source:ZFIN;Acc:ZDB-GENE-160728-113]                                                                                    | 4.397113825 | 2.507416281  | -0.665860106 | 1.224322578  |
| ENSORLG00000012064 | adm2a         | adrenomedullin 2a [Source:ZFIN;Acc:ZDB-GENE-041210-100]                                                                                   | 4.787241713 | 0.478456522  | -2.392009142 | 1.917261005  |
| ENSORLG00000012990 | lam98b        | family with sequence similarity 98, member B [Source:ZFIN;Acc:ZDB-GENE-061201-63]                                                         | 3.186615274 | 0.489956112  | -1.032007342 | 1.6651373    |
| ENSORLG00000005003 | -             | -                                                                                                                                         | 4.576795554 | 1.123360333  | -1.674677277 | 1.779248559  |
| ENSORLG00000013198 | -             | -                                                                                                                                         | 3.482207158 | 1.917921352  | -0.152563659 | 1.717335077  |
| ENSORLG00000017322 | trmem30aa     | transmembrane protein 30Aa [Source:ZFIN;Acc:ZDB-GENE-040704-26]                                                                           | 3.425052407 | 1.410658572  | -0.402376474 | 1.612502329  |
| ENSORLG00000016859 | thbs1         | Oryzias latipes thrombospondin 1 (thbs1), mRNA [Source:RefSeq; mRNA; Acc:NM_001163128]                                                    | 3.817910056 | 1.830718937  | -2.128031333 | -0.140354723 |
| ENSORLG00000016427 | ph2           | punctophilin 2 [Source:ZFIN;Acc:ZDB-GENE-030131-9848]                                                                                     | 7.687678169 | 2.611984413  | -2.669024331 | 2.406838314  |
| ENSORLG00000007377 | smad1         | SMAD family member 1 [Source:ZFIN;Acc:ZDB-GENE-991119-8]                                                                                  | 3.45163959  | 1.657903894  | 0.367910473  | 2.162130653  |
| ENSORLG00000008649 | ggt1b         | gamma-glutamyltransferase 1b [Source:ZFIN;Acc:ZDB-GENE-110408-13]                                                                         | 4.234109248 | -3.042080343 | -3.56581957  | 3.710855364  |
| ENSORLG00000003556 | c3h4          | profh 3-hydroxylase family member 4 (non-enzymatic) [Source:ZFIN;Acc:ZDB-GENE-030131-1599]                                                | 3.297250063 | 2.018019712  | 0.72060133   | 2.00031647   |
| ENSORLG00000000788 | HPGD          | 15-hydroxyprostaglandin dehydrogenase (NAD+)                                                                                              | 4.896197432 | 1.473062255  | -1.603152264 | 1.823467592  |
| ENSORLG00000005397 | anapc2b       | anapc2b [Source:NCBI; gene; Acc:101154790]                                                                                                | 5.365893889 | 2.973205133  | -2.871211048 | 1.389063393  |
| ENSORLG00000008911 | -             | -                                                                                                                                         | 6.719603869 | 2.872463394  | -2.811461392 | 1.065472208  |
| ENSORLG00000003354 | NRCAM (1 of   | neuronal cell adhesion molecule [Source:HGNC Symbol; Acc:HGNC:7944]                                                                       | 3.986307765 | 2.245339717  | 0.523379442  | 2.264832766  |
| ENSORLG00000013880 | alkal2a       | ALK and LTK ligand 2a [Source:ZFIN;Acc:ZDB-GENE-100922-116]                                                                               | 15.6354608  | 12.83678612  | -0.807980003 | 1.991162527  |
| ENSORLG00000014792 | fbx2          | F-box 2 [Source:HGNC Symbol; Acc:HGNC:111971]                                                                                             | 4.784190135 | 1.508958893  | -2.22991285  | 1.062785125  |
| ENSORLG00000018533 | scs2          | schistosin [Source:ZFIN;Acc:ZDB-GENE-110411-139]                                                                                          | 4.819715961 | 2.907182015  | -1.665897656 | 0.247133556  |
| ENSORLG00000008715 | sox1b         | suppressor of cytokine signaling 1 [Source:NCBI; gene; Acc:101165453]                                                                     | 4.462041274 | 1.119814454  | -2.264672762 | 1.078039073  |
| ENSORLG00000010712 | DDA1          | dimethylarginine dimethylaminohydrolase 1 [Source:NCBI; gene; Acc:101157285]                                                              | 4.624960097 | 1.79702084   | -0.961539839 | 1.866885738  |
| ENSORLG00000015318 | lum           | lumican [Source:ZFIN;Acc:ZDB-GENE-141625-24]                                                                                              | 6.278180277 | 2.831896433  | -2.104388678 | 1.292376888  |
| ENSORLG00000016925 | PKFB2         | 6-phosphofructo-2-kinase/fructose-2,6-bisphosphatase 2 [Source:HGNC Symbol; Acc:HGNC:8873]                                                | 3.656596777 | 0.671474566  | -0.724049525 | 2.26298948   |
| ENSORLG00000016484 | tyr4          | EYA transcriptional coactivator and phosphatase 4 [Source:ZFIN;Acc:ZDB-GENE-050327-83]                                                    | 4.291274365 | 0.940991111  | -1.621888609 | 0.731880166  |
| ENSORLG00000011281 | fat2          | FAT atypical cadherin 2 [Source:ZFIN;Acc:ZDB-GENE-111031-11]                                                                              | 4.299062629 | 0.968102046  | -1.304509748 | 2.026937386  |
| ENSORLG00000007877 | snx10c        | sorting nexin 10 [Source:NCBI; gene; Acc:101158699]                                                                                       | 4.700509215 | 2.023085117  | -1.835471086 | 0.842435258  |
| ENSORLG00000010570 | si.ch73-62121 | si.ch73-62121.1 [Source:ZFIN;Acc:ZDB-GENE-120215-179]                                                                                     | 4.00024254  | 2.037758056  | 0.891220494  | 2.854189622  |
| ENSORLG00000005340 | ddc           | Oryzias latipes dopa decarboxylase (ddc), mRNA [Source:RefSeq; mRNA; Acc:NM_001160445]                                                    | 5.779664513 | -0.15490273  | -4.23066359  | 1.696986321  |
| ENSORLG00000001827 | ocs49         | protoporphyrin oxidase subunit 49 [Source:ZFIN;Acc:ZDB-GENE-060927-11]                                                                    | 4.627432368 | 0.418120989  | -2.344653303 | 1.86514347   |
| ENSORLG00000011507 | inpp5f1       | inositol polyphosphatase-5-phosphatase 1 [Source:ZFIN;Acc:ZDB-GENE-051127-29]                                                             | 3.145767404 | 1.226596     | 0.964381234  | 2.884037391  |
| ENSORLG00000015075 | -             | -                                                                                                                                         | 5.378476441 | 1.742411169  | -0.786253828 | 2.80846662   |
| ENSORLG00000010457 | lmo1a         | leukemia inhibitory factor 1 [Source:NCBI; gene; Acc:101161630]                                                                           | 4.527131232 | 1.775085488  | -2.86140302  | -0.108873007 |
| ENSORLG00000012924 | sh3dgr        | SH3 domain-binding glutamic acid-rich-like protein [Source:NCBI; gene; Acc:101175670]                                                     | 3.240630776 | 2.079633371  | -0.208382201 | 0.953101383  |
| ENSORLG00000005230 | gb            | Hemoglobin subunit beta [Source:NCBI; gene; Acc:101158593]                                                                                | 9.901583752 | 0.038179361  | -23.29657044 | -13.43317725 |
| ENSORLG00000006046 | HGFAC         | HGF activator [Source:HGNC Symbol; Acc:HGNC:4894]                                                                                         | 5.029161546 | 1.754829518  | -1.13890701  | 2.141124381  |
| ENSORLG00000002540 | toil          | toil-like receptor 7 [Source:NCBI; gene; Acc:101162959]                                                                                   | 3.296446396 | 1.429185735  | -0.507423574 | 1.360320956  |
| ENSORLG00000007219 | EPH3B         | EPH receptor B3 [Source:HGNC Symbol; Acc:HGNC:3394]                                                                                       | 4.226826807 | 2.860424153  | -1.39418376  | 1.89418376   |
| ENSORLG0000001090  | wab70b        | switching B cell complex subunit SWAP70B [Source:ZFIN;Acc:ZDB-GENE-030131-3987]                                                           | 4.341836844 | 1.940980432  | -1.102328416 | 1.299012312  |
| ENSORLG00000015535 | -             | -                                                                                                                                         | 4.191133451 | 2.264158691  | -0.54465782  | 1.381993757  |
| ENSORLG00000022119 | -             | -                                                                                                                                         | 3.967193749 | 1.721353777  | -0.938976888 | 1.309348683  |
| ENSORLG00000017799 | -             | -                                                                                                                                         | 4.226826807 | 2.860424153  | -1.39418376  | 1.89418376   |
| ENSORLG00000013941 | -             | -                                                                                                                                         | 3.071791759 | 1.60290228   | -1.38989743  | 0.079413123  |
| ENSORLG0000001090  | wab70b        | switching B cell complex subunit SWAP70B [Source:ZFIN;Acc:ZDB-GENE-030131-3987]                                                           | 4.341836844 | 1.940980432  | -1.102328416 | 1.299012312  |
| ENSORLG00000015535 | -             | -                                                                                                                                         | 4.191133451 | 2.264158691  | -0.54465782  | 1.381993757  |
| ENSORLG00000022119 | -             | -                                                                                                                                         | 3.967193749 | 1.721353777  | -0.938976888 | 1.309348683  |
| ENSORLG00000017799 | -             | -                                                                                                                                         | 4.226826807 | 2.860424153  | -1.39418376  | 1.89418376   |
| ENSORLG00000013941 | -             | -                                                                                                                                         | 3.071791759 | 1.60290228   | -1.38989743  | 0.079413123  |
| ENSORLG00000016388 | hdac7b        | histone deacetylase 7b [Source:ZFIN;Acc:ZDB-GENE-131127-113]                                                                              | 3.997312883 | 1.512474321  | -0.97197218  | 1.51352032   |
| ENSORLG00000000382 | -             | -                                                                                                                                         | 3.678927428 | 0.985573988  | -0.512709143 | 2.178129476  |
| ENSORLG00000000409 | exoc3l2a      | exocyst complex component 3-like 2a [Source:ZFIN;Acc:ZDB-GENE-060526-343]                                                                 | 5.860316665 | 2.992441448  | -2.212261576 | 0.656098712  |
| ENSORLG00000014917 | si.ch211-107n | si.ch211-107n13.1 [Source:ZFIN;Acc:ZDB-GENE-060503-190]                                                                                   | 3.771762373 | 1.384581549  | -3.018303804 | -0.630638367 |
| ENSORLG00000002086 | -             | -                                                                                                                                         | 4.844261226 | 1.240480329  | -3.318996017 | 0.285280997  |
| ENSORLG00000009169 | -             | -                                                                                                                                         | 3.386693152 | 2.358538201  | 1.725628876  | 2.754266913  |
| ENSORLG00000015752 | cnzd2a        | G1/S-specific cyclin-D2 [Source:NCBI; gene; Acc:10114910]                                                                                 | 3.803272388 | 2.179861099  | -0.886902082 | 0.736993695  |
| ENSORLG00000011743 | em3           | echinoderm microtubule associated protein like 3 [Source:ZFIN;Acc:ZDB-GENE-110304-3]                                                      | 3.141636564 | 1.105611721  | -2.116288706 | -0.097791743 |
| ENSORLG00000013964 | -             | -                                                                                                                                         | 4.742152368 | 1.553118502  | -2.251962618 | 0.873555878  |
| ENSORLG00000002584 | unm_sar80b    | un-named sar80b [Source:ZFIN;Acc:ZDB-GENE-120727-211]                                                                                     | 3.430973437 | 1.468511922  | -0.375420629 | 1.587525372  |
| ENSORLG00000008800 | chrna2b       | cholinergic receptor, nicotinic, alpha 2b (neuronal) [Source:ZFIN;Acc:ZDB-GENE-041001-99]                                                 | 3.077194133 | -0.038635355 | -3.404194272 | -0.287879804 |
| ENSORLG00000012186 | -             | -                                                                                                                                         | 3.375786221 | 2.791922346  | -0.878067074 | -0.293718205 |
| ENSORLG00000014541 | KUN           | uncharacterized LOC101163284 [Source:NCBI; gene; Acc:101163284]                                                                           | 3.238377869 | 0.598304101  | -0.881194401 | 1.759364176  |
| ENSORLG00000014027 | pcd1          | transcription factor AP-1 [Source:NCBI; gene; Acc:101174822]                                                                              | 3.002144795 | 0.646526889  | -1.306057039 | 1.05001014   |
| ENSORLG00000015413 | pcf1b         | pterin-4 alpha-carbinolamine dehydratase/dimenzation cofactor of hepatocyte nuclear factor 1 alpha [Source:ZFIN;Acc:ZDB-GENE-040426-1787] | 3.276899153 | 0.027277187  | -2.220848439 | 1.02925823   |
| ENSORLG00000000363 | gpr171        | G protein-coupled receptor 171 [Source:ZFIN;Acc:ZDB-GENE-131121-339]                                                                      | 3.708529093 | 0.419028871  | -4.295796666 | -1.005812615 |
| ENSORLG00000018199 | ahr1b (1 of m | aryl hydrocarbon receptor 1b [Source:ZFIN;Acc:ZDB-GENE-050922-1]                                                                          | 4.967843459 | 4.543750077  | -0.800578027 | -0.376001689 |
| ENSORLG00000016107 | -             | -                                                                                                                                         | 6.457113982 | 3.427458818  | -3.023328756 | 0.006813743  |
| ENSORLG00000000900 | camk2b2       | calcium/calmodulin-dependent protein kinase (CaM kinase) II beta 2 [Source:ZFIN;Acc:ZDB-GENE-080312-34]                                   | 3.80777858  | 0.79833557   | -1.102412794 | 1.907537763  |
| ENSORLG00000005279 | trio6         | rho guanine nucleotide exchange factor b [Source:ZFIN;Acc:ZDB-GENE-030616-399]                                                            | 3.514273017 | 0.874661189  | -1.307741085 | 1.332356343  |
| ENSORLG00000003210 | -             | -                                                                                                                                         | 4.245782118 | 1.1529443    | -2.609514742 | 0.483808378  |
| ENSORLG00000006783 | psmb8a (1 of  | proteasome subunit beta 8A [Source:ZFIN;Acc:ZDB-GENE-990415-141]                                                                          | 5.63052576  | 1.44415249   | -1.608549485 | 2.578310647  |

|             |                     |                    |                                                                                                          |               |              |              |               |
|-------------|---------------------|--------------------|----------------------------------------------------------------------------------------------------------|---------------|--------------|--------------|---------------|
|             | ENSORLG0000004124   | APCDD1             | APC down-regulated 1 [Source:HGNC Symbol;Acc:HGNC:15718]                                                 | 3.003406766   | 1.916647796  | -2.606888656 | -1.519644704  |
|             | ENSORLG0000004814   | si:skey-110c1      | si:skey-110c1.10 [Source:ZFIN;Acc:ZDB-GENE-050208-429]                                                   | 7.095885994   | 3.187876542  | -3.65207662  | 0.254115179   |
|             | ENSORLG00000015972  | ephb1              | EPH receptor B1 [Source:ZFIN;Acc:ZDB-GENE-070912-219]                                                    | 4.688014566   | 3.107297587  | 0.959761416  | 2.540964297   |
|             | ENSORLG0000002885   | -                  | -                                                                                                        | 4.469037189   | 1.139342219  | -1.613538516 | 1.716640609   |
|             | ENSORLG00000001785  | P2RY4              | pyrimidinergic receptor P2Y4 [Source:HGNC Symbol;Acc:HGNC:8544]                                          | 5.258742324   | 2.15444879   | -1.815143859 | 1.289438264   |
|             | ENSORLG00000001284  | si:ch211-214f9     | si:ch211-214f9.1 [Source:ZFIN;Acc:ZDB-GENE-060526-100]                                                   | 3.536112616   | -0.895213993 | -1.796534482 | 2.63727781    |
|             | ENSORLG00000006529  | bnip6              | bone morphogenetic protein 6 [Source:ZFIN;Acc:ZDB-GENE-050506-49]                                        | 6.14979306    | 1.140250119  | -3.104242977 | 1.905732287   |
|             | ENSORLG00000017009  | hnt5ab             | family with sequence similarity 46, member A [Source:ZFIN;Acc:ZDB-GENE-071004-35]                        | 4.108515787   | 1.021768365  | -1.535802833 | 1.551428999   |
|             | ENSORLG00000009755  | -                  | -                                                                                                        | 4.896148744   | 2.514680108  | -0.962076776 | 1.419976055   |
|             | ENSORLG00000004036  | -                  | -                                                                                                        | 3.064767536   | 0.89790624   | -0.90386505  | 1.269280157   |
|             | ENSORLG00000000775  | -                  | myosin 11 [Source:NCBI;gene:Acc:101172658]                                                               | 5.258731679   | 1.276434448  | -2.633395087 | 1.349387605   |
|             | ENSORLG00000012106  | slc41a1            | solute carrier family 41 (magnesium transporter), member 1 [Source:ZFIN;Acc:ZDB-GENE-030131-4700]        | 4.294608153   | 0.610657378  | -1.187953699 | 2.496480657   |
|             | ENSORLG00000016850  | PRKCZ              | protein kinase C zeta [Source:HGNC Symbol;Acc:HGNC:9412]                                                 | 3.498225783   | 0.20032312   | -0.391938866 | 2.906453294   |
|             | ENSORLG00000008220  | ar-alpha           | Oxyrias latipes androgen receptor beta (ar-alpha) mRNA [Source:RefSeq mRNA;Acc:NM_001122911]             | 4.318650365   | 2.703748553  | -0.688855146 | 0.926531492   |
|             | ENSORLG00000016176  | -                  | -                                                                                                        | 4.638053581   | 1.545054985  | -1.821287324 | 1.272196297   |
|             | ENSORLG00000007487  | aatka              | apoptosis-associated tyrosine kinase 4 [Source:ZFIN;Acc:ZDB-GENE-100812-4]                               | 3.983576429   | 1.74639728   | -1.20899183  | 1.02875579    |
|             | ENSORLG00000006554  | alx4b              | ALX homeobox 4b [Source:ZFIN;Acc:ZDB-GENE-050208-140]                                                    | 15.7084424    | 12.17542792  | -4.387320218 | -0.853817851  |
|             | ENSORLG00000011441  | dock11             | dedicator of cytokinesis 11 [Source:ZFIN;Acc:ZDB-GENE-060503-196]                                        | 4.505987704   | 1.818028773  | -2.261772057 | 0.426671347   |
|             | ENSORLG00000015292  | pip4k2cb           | phosphatidylinositol 5-phosphate 4-kinase type-2 gamma [Source:NCBI;gene:Acc:101173218]                  | 4.052509911   | 0.546010901  | -0.967203085 | 2.53977904    |
|             | ENSORLG00000021309  | RF0045             | small nucleolar RNA SNORA73 family [Source:NCBI;gene:Acc:111947131]                                      | 4.466729743   | 2.260750366  | 0.790703772  | 2.997168413   |
|             | ENSORLG00000004371  | dic5a              | chloride intracellular channel 5a [Source:ZFIN;Acc:ZDB-GENE-041114-84]                                   | 5.76785201    | 1.565337096  | -2.269611922 | 1.933388177   |
|             | ENSORLG00000018204  | fos2               | fos-like antigen 2 [Source:ZFIN;Acc:ZDB-GENE-070209-164]                                                 | 5.375191582   | 1.33330999   | -1.978306692 | 2.064038315   |
|             | ENSORLG00000018163  | -                  | -                                                                                                        | 5.038138823   | 0.806782899  | -15.97261637 | -11.74109194  |
|             | ENSORLG000000015172 | mx1                | max interactor 1, dimerization protein [Source:ZFIN;Acc:ZDB-GENE-050415-151]                             | 3.791509547   | 1.400431251  | -0.80145146  | 1.590111678   |
|             | ENSORLG00000000339  | agp10b             | agapronin 10b [Source:ZFIN;Acc:ZDB-GENE-060503-57]                                                       | 4.018528542   | -0.342818939 | -1.53383841  | 2.827992819   |
|             | ENSORLG00000018046  | -                  | -                                                                                                        | 4.824365597   | 1.75987691   | -2.539567922 | 0.525405786   |
|             | ENSORLG00000009010  | ephb3a             | eph receptor B3a [Source:ZFIN;Acc:ZDB-GENE-990415-60]                                                    | 4.194918755   | 1.896223847  | -1.395513327 | 0.901666039   |
|             | ENSORLG00000015556  | znf703             | zinc finger protein 703 [Source:ZFIN;Acc:ZDB-GENE-010717-1]                                              | 3.360244029   | 0.969240801  | -2.253604334 | 0.137883412   |
|             | ENSORLG00000017460  | cers1              | ceramide synthase 1 [Source:ZFIN;Acc:ZDB-GENE-050208-406]                                                | 5.759735596   | 2.440545148  | -2.809978756 | 0.509702164   |
|             | ENSORLG00000015711  | bvm                | basic, immunoglobulin-like variable motif containing [Source:ZFIN;Acc:ZDB-GENE-010822-3]                 | 3.056878136   | 0.16746299   | -0.346138399 | 2.543762011   |
|             | ENSORLG00000012425  | ptpn6              | protein tyrosine phosphatase, non-receptor type 6 [Source:ZFIN;Acc:ZDB-GENE-030131-7513]                 | 3.669098807   | 2.019274319  | -1.700242317 | -0.049933062  |
|             | ENSORLG00000014511  | si:skey-239z0      | si:skey-239z0.4 [Source:ZFIN;Acc:ZDB-GENE-030131-2644]                                                   | 3.198959033   | 1.093711792  | -0.891360787 | 1.214370321   |
|             | ENSORLG00000008635  | abcd2              | ATP-binding cassette, sub-family D (ALD), member 2 [Source:ZFIN;Acc:ZDB-GENE-050517-28]                  | 3.252532775   | 1.955746036  | -0.209986831 | 1.087285217   |
|             | ENSORLG00000013019  | spred1             | sprouty-related, EPH1 domain containing 1 [Source:ZFIN;Acc:ZDB-GENE-040426-2338]                         | 6.767333485   | 4.023415674  | -1.099995616 | 1.64441146    |
|             | ENSORLG00000003734  | NFX (1 of many)    | nuclear factor 1X [Source:HGNC Symbol;Acc:HGNC:101144651]                                                | 3.254288249   | 1.119051718  | -2.172890014 | -0.037808167  |
|             | ENSORLG00000002797  | rsr2               | rsd-skipped related transcription factor 2 [Source:NCBI;gene:Acc:101184502]                              | 3.139956572   | 2.33445238   | -1.511782768 | -0.704787735  |
|             | ENSORLG00000012350  | -                  | ermynthyn-2 like [Source:NCBI;gene:Acc:101174464]                                                        | 4.401082028   | 1.857988939  | -4.207352604 | -1.663817927  |
|             | ENSORLG00000000293  | si:ch211-255f2     | si:ch211-255f2.3 [Source:ZFIN;Acc:ZDB-GENE-141218-113]                                                   | 6.381571423   | 2.774737609  | -4.23549447  | -0.628119891  |
| HmtO VS WTO | 88                  | ENSORLG00000006423 | -                                                                                                        | 2.339253791   | 3.364477799  | 1.084696444  | 0.059957724   |
|             | ENSORLG00000006578  | slsk               | slk-related kinase [Source:ZFIN;Acc:ZDB-GENE-040426-1506]                                                | 2.807753293   | 4.21202847   | -0.42434592  | 0.04243592    |
|             | ENSORLG00000003484  | slal1              | Src-like-adapter 1 [Source:ZFIN;Acc:ZDB-GENE-050904-3]                                                   | 1.151479854   | 3.165758316  | 1.910981484  | -0.102812619  |
|             | ENSORLG00000002167  | RF00284            | small nucleolar RNA SNORD74 [Source:NCBI;gene:Acc:111947413]                                             | -12.63301337  | 5.431997698  | 13.32769438  | -4.736825993  |
|             | ENSORLG00000006720  | si:ch211-241f6     | si:ch211-241f6.3 [Source:ZFIN;Acc:ZDB-GENE-131127-562]                                                   | 1.600537159   | 4.200580927  | 2.285075802  | -0.0314481725 |
|             | ENSORLG00000005961  | -                  | glutathione S-transferase Mu 5 [Source:NCBI;gene:Acc:101157858]                                          | 0.882912403   | 4.839535112  | 1.619307058  | -2.336830765  |
|             | ENSORLG00000003632  | -                  | cell surface A33 antigen-like [Source:NCBI;gene:Acc:101160989]                                           | 1.134556428   | 3.530842334  | 1.32367267   | -1.072228339  |
|             | ENSORLG00000005824  | gnrh3              | Oxyrias latipes prepro-gonadotropin-releasing hormone (gnrh3) mRNA [Source:RefSeq mRNA;Acc:NM_001104672] | -16.426586696 | 3.298120449  | 10.25296104  | -9.471256466  |
|             | ENSORLG00000016162  | -                  | Oxyrias latipes Herf (LOC100049436), mRNA [Source:RefSeq mRNA;Acc:NM_001104810]                          | 1.982437411   | 8.524040977  | 1.006611077  | -5.534510758  |
|             | ENSORLG00000017610  | cx34.5             | connexin 34.5 [Source:ZFIN;Acc:ZDB-GENE-050224-2]                                                        | 1.823973426   | 3.943822338  | -5.896033504 | -0.015410833  |
|             | ENSORLG00000002894  | -                  | -                                                                                                        | 0             | 16.18785857  | 12.81087653  | -2.556708491  |
|             | ENSORLG00000002120  | RF00612            | small nucleolar RNA SNORD75 [Source:NCBI;gene:Acc:111947416]                                             | -11.31474194  | 5.013521263  | 14.93990417  | -1.388669234  |
|             | ENSORLG00000004107  | -                  | -                                                                                                        | 14.80376887   | 16.29475678  | 0.566389486  | -0.924138127  |
|             | ENSORLG00000017093  | zgc153157          | zgc153157 [Source:ZFIN;Acc:ZDB-GENE-060825-224]                                                          | 2.276547709   | 3.497540254  | -0.831083638 | -2.051597365  |
|             | ENSORLG00000018146  | -                  | -                                                                                                        | 4.267791873   | 4.532198469  | 1.428614169  | 1.164730348   |
|             | ENSORLG00000013850  | -                  | -                                                                                                        | 16.5731675    | 10.7018185   | -6.372503805 | -0.72531815   |
|             | ENSORLG00000002134  | -                  | -                                                                                                        | 4.156195454   | 6.69899843   | -0.080642314 | -1.623964693  |
|             | ENSORLG00000007211  | adma               | adrenomedullin [Source:NCBI;gene:Acc:100125438]                                                          | 2.917671499   | 3.067030431  | -0.214278438 | -0.363159267  |
|             | ENSORLG00000011567  | -                  | -                                                                                                        | -13.88436321  | 3.237271738  | 14.30087484  | -2.810138321  |
|             | ENSORLG000000005213 | -                  | -                                                                                                        | -10.71312012  | 5.476364924  | 11.6290287   | -4.559967072  |
|             | ENSORLG00000007814  | -                  | -                                                                                                        | -5.209746021  | 3.915249162  | 0.726676626  | -8.399694446  |
|             | ENSORLG00000017009  | anxa2a             | annexin A2, A [Source:NCBI;gene:Acc:101167451]                                                           | 1.515469788   | 1.72972238   | 1.025458522  | -0.896893121  |
|             | ENSORLG00000015290  | -                  | -                                                                                                        | 0.605421938   | 4.027117928  | 1.942702356  | -1.478570975  |
|             | ENSORLG00000012826  | -                  | -                                                                                                        | 1.668064006   | 4.611643119  | 2.756689853  | -0.187407611  |
|             | ENSORLG00000018221  | -                  | -                                                                                                        | -0.046313926  | 3.547689863  | 3.014698204  | -0.365901886  |
|             | ENSORLG00000008441  | -                  | -                                                                                                        | 4.752782161   | 3.915235987  | 0.407031479  | -1.455940564  |
|             | ENSORLG00000015010  | slc27a1b           | solute carrier family 27 (fatty acid transporter), member 1b [Source:ZFIN;Acc:ZDB-GENE-061013-872]       | 3.527512955   | 8.817929831  | -1.392314959 | -6.682241896  |
|             | ENSORLG00000006890  | IL1F1              | IL1 family inflammatory factor 1 [Source:NCBI;gene:Acc:101175592]                                        | -13.56561502  | 3.878838639  | 14.89041582  | -2.553547477  |
|             | ENSORLG00000005918  | -                  | -                                                                                                        | -4.792054685  | 3.827115133  | 0.00078633   | -8.614513691  |
|             | ENSORLG00000018328  | -                  | -                                                                                                        | 1.781770034   | 3.85029279   | 1.1732947    | -0.896893121  |
|             | ENSORLG00000002688  | -                  | -                                                                                                        | -8.881788959  | 7.296217008  | 14.20519913  | -1.912302004  |
|             | ENSORLG00000009126  | erb2               | Oxyrias latipes estrogen-related receptor beta type 2 (erb2) mRNA [Source:RefSeq mRNA;Acc:NM_001163091]  | 1.50209701    | 8.208995727  | 3.369412677  | -3.336999572  |
|             | ENSORLG00000000557  | -                  | -                                                                                                        | 8.817143358   | 15.99838042  | 4.614602785  | -2.566194242  |
|             | ENSORLG00000001199  | -                  | -                                                                                                        | 8.490048599   | 15.69327704  | 5.666318942  | -1.536436843  |
|             | ENSORLG00000004277  | hsd17b3            | hydroxysteroid (17-beta) dehydrogenase 3 [Source:ZFIN;Acc:ZDB-GENE-040426-1339]                          | -2.760197371  | 3.189194363  | 4.638943094  | -1.310550334  |
|             | ENSORLG00000000836  | -                  | -                                                                                                        | -0.179951725  | 0.179951725  | 8.278357079  | -8.278357079  |
|             | ENSORLG00000013321  | -                  | -                                                                                                        | -0.596171255  | 0.596171255  | 3.285681104  | -4.403233531  |
|             | ENSORLG00000017090  | -                  | -                                                                                                        | 10.06323355   | 20.01925029  | 1.857104209  | -8.108456882  |

|            |                    |                   |                                                                                                     |               |              |              |              |
|------------|--------------------|-------------------|-----------------------------------------------------------------------------------------------------|---------------|--------------|--------------|--------------|
|            | ENSRORG0000011883  | ephb6             | eph receptor B6 [Source:ZFIN;Acc:ZDB-GENE-100922-51]                                                | 0.734474051   | 7.447299403  | 2.427313851  | -4.285022511 |
|            | ENSRIG00000004187  | -                 | -                                                                                                   | 2.364372006   | 6.710977083  | -4.846034603 | -9.192147038 |
|            | ENSRIG00000007108  | -                 | -                                                                                                   | -12.83807329  | 3.901003792  | 15.45518368  | -1.283402172 |
|            | ENSRIG000000017005 | -                 | -                                                                                                   | 3.390768654   | 4.548142006  | 2.039939115  | 0.883051472  |
|            | ENSRIG00000005715  | olfcg6            | extracellular calcium-sensing receptor-like [Source:NCBI gene:Acc:101174763]                        | -10.72021005  | 5.261451258  | 0            | -15.98166828 |
|            | ENSRIG00000004161  | -                 | -                                                                                                   | 2.927132005   | 5.033639836  | -1.584207646 | -3.690231849 |
|            | ENSRIG000000021868 | RF00271           | coenzyme Q-binding protein COQ10 homolog, mitochondrial [Source:NCBI gene:Acc:101164311]            | -10.16093027  | 5.500183451  | 15.5619472   | -0.098031067 |
|            | ENSRIG000000011040 | -                 | -                                                                                                   | 13.7885853    | 4.528957062  | 13.2489484   | -2.136494868 |
|            | ENSRIG00000001109  | -                 | -                                                                                                   | 2.484489351   | 3.45517393   | 0.098410647  | -0.070233698 |
|            | ENSRIG00000006007  | sou5              | heme-binding protein sou5 [Source:ZFIN;Acc:ZDB-GENE-110718-2]                                       | -4.101978636  | 3.324966349  | 2.293820203  | -5.187078109 |
|            | ENSRIG000000016133 | -                 | -                                                                                                   | 5.17964243    | 8.784710849  | 1.377335417  | -2.27273393  |
|            | ENSRIG00000009963  | -                 | -                                                                                                   | -14.66705331  | 3.204260399  | 0            | -17.87132015 |
|            | ENSRIG000000021451 | RF00070           | small nucleolar RNA SNORD29 [Source:NCBI gene:Acc:111946360]                                        | -12.31474184  | 3.305502715  | 15.29735838  | -0.322396762 |
|            | ENSRIG00000001178  | -                 | -                                                                                                   | 1.327483849   | 6.328796471  | 2.621065209  | -2.377598303 |
|            | ENSRIG000000001825 | crot              | carbamate O-acetyltransferase [Source:NCBI gene:Acc:101171357]                                      | -11.05257484  | 5.404364915  | 10.65068379  | -5.805766305 |
|            | ENSRIG00000009255  | crot              | carbamate O-acetyltransferase [Source:NCBI gene:Acc:101171357]                                      | 0.658501109   | 3.808104507  | 0.807021458  | -2.342097223 |
|            | ENSRIG00000006058  | C3orf80           | chromosome 3 open reading frame 80 [Source:HGNC Symbol;Acc:HGNC:40048]                              | -1.310427329  | 3.159226141  | 0.736602615  | -1.111170761 |
|            | ENSRIG000000015788 | -                 | -                                                                                                   | -11.69532835  | 5.590123959  | 14.26333743  | -3.021625097 |
|            | ENSRIG000000000087 | -                 | -                                                                                                   | 0             | 15.92564229  | 10.42636878  | -5.49894774  |
|            | ENSRIG00000009496  | -                 | -                                                                                                   | 0.505785748   | 3.502402876  | -0.318088707 | -3.314230875 |
|            | ENSRIG000000021468 | RF00069           | small nucleolar RNA SNORD24 [Source:NCBI gene:Acc:111947418]                                        | 1.497411064   | 7.287775155  | 3.10551255   | -2.684370103 |
|            | ENSRIG000000011788 | -                 | -                                                                                                   | -12.88998421  | 3.088356655  | 13.03343677  | -2.944238637 |
|            | ENSRIG000000016089 | -                 | -                                                                                                   | -1.401980383  | 4.95310516   | 2.318807778  | -4.018807186 |
|            | ENSRIG000000021554 | RF00099           | small nucleolar RNA SNORD22 [Source:NCBI gene:Acc:111946360]                                        | -14.19580257  | 15.6773535   | 2.20078903   | 0.719705048  |
|            | ENSRIG00000009899  | -                 | -                                                                                                   | 18.21778804   | 6.333207458  | 10.13615805  | -12.41243438 |
|            | ENSRIG000000017016 | -                 | -                                                                                                   | -0.085892819  | 5.844205651  | 4.899790141  | -0.619820043 |
|            | ENSRIG000000021285 | RF00591           | small nucleolar RNA snR60/Z15Z30/Z193/17 [Source:NCBI gene:Acc:111947414]                           | 0.724028756   | 3.334028655  | 2.556705289  | -0.052810403 |
|            | ENSRIG000000017074 | -                 | -                                                                                                   | 0             | 16.88620778  | 12.25450606  | -4.431230125 |
|            | ENSRIG000000008540 | -                 | -                                                                                                   | -13.09797943  | 3.454230434  | 0            | -16.55221593 |
|            | ENSRIG000000000253 | -                 | -                                                                                                   | -8.66895877   | 7.049034663  | 13.86279328  | -1.854889197 |
|            | ENSRIG00000003097  | -                 | -                                                                                                   | -12.4455736   | 3.420748027  | 14.0549513   | -3.910786004 |
|            | ENSRIG00000006867  | si ch211-240n     | chemokine-like receptor 1 [Source:ZFIN;Acc:ZDB-GENE-060526-126]                                     | 1.287442533   | 3.672975688  | 2.075919146  | -0.309129433 |
|            | ENSRIG000000014327 | -                 | -                                                                                                   | -1.48865657   | 3.6442344    | 1.656622447  | -3.475792401 |
|            | ENSRIG00000005912  | cd81b             | CD81 molecule b [Source:ZFIN;Acc:ZDB-GENE-040808-52]                                                | 2.847521327   | 3.911543291  | 1.617465387  | 0.653927148  |
|            | ENSRIG000000012376 | ptpip1b           | proline-senase-threonine phosphatase interacting protein 1b [Source:ZFIN;Acc:ZDB-GENE-051127-25]    | 1.960917848   | 3.306661368  | -0.137307322 | -1.476564358 |
|            | ENSRIG000000005946 | -                 | -                                                                                                   | 2.028198587   | 3.012972482  | 0.778548167  | -0.204740139 |
|            | ENSRIG000000013883 | -                 | -                                                                                                   | 3.397748184   | 4.91697148   | 3.218804898  | -0.06454504  |
|            | ENSRIG000000011796 | -                 | -                                                                                                   | 3.88483922    | 3.918904428  | 2.678974832  | 1.068854115  |
|            | ENSRIG000000070886 | myofll            | myofelin like [Source:ZFIN;Acc:ZDB-GENE-111116-2]                                                   | 0.842748128   | 3.420638474  | 2.178652336  | -0.65054041  |
|            | ENSRIG000000021274 | RF00281           | small nucleolar RNA SNORD47 [Source:NCBI gene:Acc:111947412]                                        | 1.757039582   | 3.026189407  | 2.035193712  | 0.766527722  |
|            | ENSRIG000000012514 | -                 | -                                                                                                   | -0.003592862  | 5.713062113  | 2.086110182  | -3.630062035 |
|            | ENSRIG000000000473 | -                 | -                                                                                                   | 2.208203976   | 3.306163836  | -0.836257819 | -1.933732668 |
|            | ENSRIG000000017085 | -                 | -                                                                                                   | 0             | 17.5205118   | 13.67108214  | -3.848957462 |
|            | ENSRIG000000011753 | abi3tpa           | ABI family, member 3 (NESH) binding protein a [Source:ZFIN;Acc:ZDB-GENE-070912-325]                 | -0.478522541  | 3.30292313   | 0.0628805    | -3.718076732 |
|            | ENSRIG000000001170 | -                 | -                                                                                                   | -9.947373942  | 5.693097453  | 13.33602251  | -2.30396196  |
|            | ENSRIG000000002029 | -                 | -                                                                                                   | -3.383335714  | 7.556877654  | 6.96565559   | -3.973889333 |
|            | ENSRIG000000006289 | -                 | -                                                                                                   | -11.01472351  | 4.792702363  | 15.18189415  | -0.684538278 |
|            | ENSRIG000000007250 | -                 | -                                                                                                   | -11.55487659  | 4.290705652  | 0            | -15.8455832  |
|            | ENSRIG000000011776 | -                 | -                                                                                                   | 2.371720089   | 3.273248337  | 2.49623806   | 1.595196422  |
|            | ENSRIG000000011891 | qhvl-4            | immunoglobulin heavy variable 1-4 [Source:ZFIN;Acc:ZDB-GENE-040514-1]                               | 2.703955716   | 4.820706558  | 2.158363525  | 0.042097762  |
| Hmt VS WTT | 718                | ENSRIG00000008213 | -                                                                                                   | -2.252000578  | 0.065087827  | 3.186931598  | 0.880328174  |
|            | ENSRIG000000010936 | -                 | -                                                                                                   | -1.844315882  | 0.339103369  | 3.564994518  | 1.30260104   |
|            | ENSRIG000000016363 | isca2             | iron-sulfur cluster assembly 2 [Source:ZFIN;Acc:ZDB-GENE-131121-486]                                | -2.178971946  | 0.455792664  | 3.616825719  | 0.982546081  |
|            | ENSRIG00000005255  | -                 | -                                                                                                   | -1.65188544   | 2.058613313  | 5.968977357  | 2.257962112  |
|            | ENSRIG00000003255  | YAF2 (1 of many)  | YY1 associated factor 2 [Source:HGNC Symbol;Acc:HGNC:17363]                                         | -2.059009946  | 0.589514105  | 3.644945087  | 0.996095988  |
|            | ENSRIG000000017153 | -                 | -                                                                                                   | -11.435039927 | 3.540012039  | 17.28616339  | 2.311605328  |
|            | ENSRIG000000011235 | nchp2             | nuclear cap binding protein subunit 2 [Source:ZFIN;Acc:ZDB-GENE-020419-31]                          | -1.244361204  | 1.367364509  | 3.792668664  | 1.181446269  |
|            | ENSRIG000000009861 | se26a             | seizure related 6 homolog a [Source:ZFIN;Acc:ZDB-GENE-030131-8208]                                  | -5.11596497   | -0.765236823 | 4.934839922  | 0.584966153  |
|            | ENSRIG000000016956 | dnajc17           | DnaJ heat shock protein family (Hsp40) member C17 [Source:NCBI gene:Acc:101171293]                  | -3.877991568  | -0.331539898 | 3.714203628  | 0.168238788  |
|            | ENSRIG000000016990 | psma8             | proteasome subunit alpha 8 [Source:ZFIN;Acc:ZDB-GENE-040426-2194]                                   | -2.114369214  | 1.495189529  | 4.363165164  | 0.754091155  |
|            | ENSRIG000000003731 | PRELID3B          | PREL domain containing protein 3B [Source:NCBI gene:Acc:101164398]                                  | -0.542028695  | 0.223444128  | 3.157409992  | 2.392422125  |
|            | ENSRIG000000009647 | ef1ad             | eukaryotic translation initiation factor 1A domain containing [Source:NCBI gene:Acc:101161651]      | -1.941506539  | -0.140645213 | 3.541356124  | 1.740879704  |
|            | ENSRIG00000007002  | -                 | -                                                                                                   | -17.53162735  | 1.9219937    | 18.51743395  | -0.935698988 |
|            | ENSRIG000000008052 | nx2               | nuclear transport factor 2-like export factor 2 [Source:ZFIN;Acc:ZDB-GENE-050521-1]                 | -1.34393565   | 0.820084946  | 4.213913931  | 2.05037829   |
|            | ENSRIG000000008081 | -                 | -                                                                                                   | -11.01472351  | 4.792702363  | 15.18189415  | -0.684538278 |
|            | ENSRIG000000005534 | cabpnp1           | histone H2A-like [Source:NCBI gene:Acc:101161532]                                                   | -5.440375745  | -0.669169785 | 4.255132051  | -0.515588247 |
|            | ENSRIG000000016378 | -                 | -                                                                                                   | 2.57342498    | -0.922419121 | 3.81459064   | 2.164076886  |
|            | ENSRIG00000001781  | cdn5              | prelidin 5 [Source:ZFIN;Acc:ZDB-GENE-030131-8858]                                                   | -2.715752878  | 0.533672047  | 3.715577754  | 0.466837748  |
|            | ENSRIG00000004537  | snmm15            | small integral membrane protein 15 [Source:NCBI gene:Acc:101165811]                                 | -1.671259115  | 0.912621825  | 4.77280319   | 2.189284369  |
|            | ENSRIG000000007945 | uba3              | ubiquitin-like modifier activating enzyme 3 [Source:ZFIN;Acc:ZDB-GENE-040426-2825]                  | -2.344837277  | 0.238734151  | 4.226612838  | 1.643526285  |
|            | ENSRIG000000015891 | -                 | -                                                                                                   | -2.49827392   | -0.230746187 | 3.202751559  | 0.935754589  |
|            | ENSRIG000000007402 | sm6               | LSM6 homolog, U6 small nuclear RNA and mRNA degradation associated [Source:NCBI gene:Acc:101156227] | -20.62584674  | 2.613784967  | 22.32961011  | -0.909531468 |
|            | ENSRIG000000001720 | cln6a             | CLN6, transmembrane ER protein [Source:NCBI gene:Acc:101166858]                                     | -2.152068997  | -0.624439874 | 3.981697455  | 2.454551927  |
|            | ENSRIG000000018097 | -                 | -                                                                                                   | -2.620454341  | 0.367721153  | 5.732362009  | 2.744671555  |
|            | ENSRIG000000013883 | tmem18            | transmembrane protein 18 [Source:NCBI gene:Acc:101158989]                                           | -4.419316808  | 1.194346852  | 4.564497672  | -1.048680746 |
|            | ENSRIG00000009116  | naaf50            | (Naf50) acetyltransferase 50, Naf catalytic subunit [Source:NCBI gene:Acc:101162486]                | -2.749120441  | 1.413171693  | 4.797831522  | 0.636024338  |
|            | ENSRIG000000002783 | polr2k            | RNA polymerase II subunit K [Source:NCBI gene:Acc:101167378]                                        | -4.641690103  | 1.931506944  | 6.088748836  | -0.483964168 |
|            | ENSRIG000000021758 | -                 | -                                                                                                   | -13.30972502  | 2.034765866  | 16.30311503  | 0.959115159  |
|            | ENSRIG000000007998 | ktl12             | KTLL2 chromatin associated homolog [Source:ZFIN;Acc:ZDB-GENE-060825-174]                            | -4.674204947  | 1.132987684  | 4.575901883  | -1.230810949 |
|            | ENSRIG000000008782 | nek7              | NIMA-related kinase 7 [Source:ZFIN;Acc:ZDB-GENE-040801-136]                                         | -1.034549042  | 1.401464425  | 4.338787016  | 1.901258167  |





|                     |                |                                                                                                             |              |              |              |              |
|---------------------|----------------|-------------------------------------------------------------------------------------------------------------|--------------|--------------|--------------|--------------|
| ENSRORG0000009553   | atmin          | ATM interactor [Source:ZFIN;Acc:ZDB-GENE-030616-220]                                                        | -1.637395916 | 0.592359065  | 3.090709904  | 0.861439714  |
| ENSRORG0000008024   | copz1          | coatomer protein complex subunit zeta 1 [Source:ZFIN;Acc:ZDB-GENE-000406-6]                                 | -4.194884974 | 2.162972222  | 6.735585167  | 0.37821267   |
| ENSRORG0000006027   | atn3           | atn3 [Source:ZFIN;Acc:ZDB-GENE-040426-983]                                                                  | -16.62320635 | 1.371993808  | 17.59678256  | -0.3964763   |
| ENSRORG0000009542   | -              | -                                                                                                           | -1.09278451  | 1.07160337   | 3.64858653   | 1.53610974   |
| ENSRORG0000021764   | -              | -                                                                                                           | -1.116218989 | 15.30901549  | 4.86547478   | 0.719115491  |
| ENSRORG0000003861   | -              | -                                                                                                           | -12.78500283 | 2.697675914  | 17.01578744  | 1.535959476  |
| ENSRORG0000001137   | ndufa3         | NADH dehydrogenase (ubiquinone) 1 alpha subcomplex, 3 [Source:ZFIN;Acc:ZDB-GENE-040901-18]                  | -18.58421079 | 1.293797517  | 20.03074438  | 0.153226097  |
| ENSRORG0000001139   | fam173a        | family with sequence similarity 173, member A [Source:ZFIN;Acc:ZDB-GENE-040625-59]                          | -0.903653746 | 1.654365302  | 4.540498074  | 1.982963949  |
| ENSRORG00000015618  | -              | -                                                                                                           | 0.209380344  | 1.257750397  | 4.019201463  | 2.971316187  |
| ENSRORG0000009636   | tbn28          | RNA binding motif protein 28 [Source:ZFIN;Acc:ZDB-GENE-040426-960]                                          | -2.021120916 | 1.130649083  | 3.746754757  | 0.595469489  |
| ENSRORG0000004227   | dniz           | DNA-type zinc finger [Source:ZFIN;Acc:ZDB-GENE-070112-1482]                                                 | -4.025072773 | 0.733075024  | 3.777664193  | -0.979998241 |
| ENSRORG00000002261  | ubtcip1        | ubiquitin like domain containing CTD phosphatase 1 [Source:NCBI; gene:Acc:101175164]                        | -3.33570191  | 0.823237189  | 4.139425893  | -0.019028211 |
| ENSRORG00000018601  | atg12          | ATG12 autophagy related 12 homolog (S. cerevisiae) [Source:ZFIN;Acc:ZDB-GENE-071205-7]                      | -2.316283464 | 0.613692502  | 3.033277019  | 0.103806014  |
| ENSRORG00000014805  | -              | -                                                                                                           | -9.444173414 | 1.713166299  | 5.132185505  | -6.024668691 |
| ENSRORG00000012945  | wrb            | tryptophan rich basic protein [Source:ZFIN;Acc:ZDB-GENE-030131-7696]                                        | -3.64713528  | 0.071694332  | 3.558022029  | -0.160322856 |
| ENSRORG00000007904  | ube2w          | ubiquitin-conjugating enzyme E2W (putative) [Source:ZFIN;Acc:ZDB-GENE-050506-34]                            | -3.110764005 | 2.33725761   | 5.490834318  | 0.043000197  |
| ENSRORG00000007811  | -              | -                                                                                                           | -2.605169    | 0.631083992  | 4.718385248  | 1.48261719   |
| ENSRORG00000007140  | polr2h         | RNA polymerase II subunit H [Source:NCBI; gene:Acc:101159428]                                               | -7.433728165 | 1.731301036  | 9.208984497  | 0.044441709  |
| ENSRORG00000003083  | -              | -                                                                                                           | 1.617318673  | 4.94268656   | 5.156208344  | 1.83132231   |
| ENSRORG00000017109  | -              | -                                                                                                           | -1.015537125 | 0.427311333  | 3.247694891  | 1.805331193  |
| ENSRORG00000005528  | trappc2l       | trafficking protein particle complex 2 like [Source:NCBI; gene:Acc:101171474]                               | -3.930307748 | 2.182517268  | 7.607198176  | 1.494857481  |
| ENSRORG00000011425  | chmp5b         | charged multivesicular body protein 5 [Source:NCBI; gene:Acc:101159542]                                     | -1.235983567 | 1.135504544  | 3.202362546  | 0.831359291  |
| ENSRORG00000003041  | -              | -                                                                                                           | -1.43105244  | 2.20819178   | 5.5064923    | 1.86772952   |
| ENSRORG00000009874  | rab2           | RAB, member of RAS oncogene family-like 2 [Source:ZFIN;Acc:ZDB-GENE-060503-464]                             | -0.204497353 | 1.980985106  | 4.546582346  | 2.361584558  |
| ENSRORG00000004700  | vps36          | vacuolar protein sorting 36 homolog [Source:NCBI; gene:Acc:101172754]                                       | -2.752840087 | 0.236514493  | 4.683277645  | 1.694407821  |
| ENSRORG00000008901  | -              | -                                                                                                           | -3.345991044 | -0.888993805 | 4.410209649  | 1.953697429  |
| ENSRORG00000016868  | -              | -                                                                                                           | -4.97168988  | 0.90278537   | 6.892705513  | 0.02172598   |
| ENSRORG000000009747 | uroc           | uroporphyrinogen III synthase [Source:NCBI; gene:Acc:101165599]                                             | -1.205796483 | 0.906899057  | 3.82089333   | 1.708593065  |
| ENSRORG00000014484  | -              | -                                                                                                           | -0.42547732  | 2.106337454  | 5.371410265  | 2.79008037   |
| ENSRORG00000015816  | -              | -                                                                                                           | -3.3087681   | -0.018645357 | 4.548293538  | 1.258659751  |
| ENSRORG00000010498  | fam135a        | family with sequence similarity 135, member A [Source:ZFIN;Acc:ZDB-GENE-080130-11]                          | -0.835250087 | 0.892371768  | 3.100312914  | 1.373175962  |
| ENSRORG00000017293  | mett8          | methyltransferase like 8 [Source:ZFIN;Acc:ZDB-GENE-041114-19]                                               | -16.26336421 | 2.295508185  | 17.05182442  | -1.50655793  |
| ENSRORG00000004602  | elov17a        | ELCVL fatty acid elongase 7a [Source:ZFIN;Acc:ZDB-GENE-030131-6149]                                         | -1.837031926 | 1.033577705  | 3.647015714  | 0.776891084  |
| ENSRORG00000007971  | ctb5           | chromobox homolog 5 (HP1 alpha homolog, Drosophila) [Source:ZFIN;Acc:ZDB-GENE-030131-5553]                  | -1.793178257 | 1.18646817   | 4.0283985    | 1.049052223  |
| ENSRORG00000000519  | -              | -                                                                                                           | -1.777635799 | 0.416288111  | 3.89602457   | 1.502584112  |
| ENSRORG00000001649  | -              | -                                                                                                           | -1.861059623 | 0.411261932  | 3.794647212  | 1.522810603  |
| ENSRORG00000008281  | lyar           | ly1 antibody reactive [Source:NCBI; gene:Acc:101158787]                                                     | -4.08788306  | 1.120770616  | 5.507279974  | 0.299110924  |
| ENSRORG00000013308  | polr2i         | RNA polymerase II subunit I [Source:NCBI; gene:Acc:101158787]                                               | -1.116439992 | 1.163228454  | 3.67471747   | 1.395533782  |
| ENSRORG00000006284  | BLOC1S1        | biogenesis of lysosomal organelles complex 1 subunit 1 [Source:HGN; Symbol:Acc:HGN-4200]                    | -1.517914712 | 0.830670387  | 3.214443244  | 0.866343078  |
| ENSRORG000000017183 | -              | -                                                                                                           | -7.931697774 | -0.980725117 | 4.459810299  | -2.490677886 |
| ENSRORG00000017910  | morc3a         | MORC family CW-type zinc finger 3a [Source:ZFIN;Acc:ZDB-GENE-030131-1502]                                   | -2.936462092 | -0.222576703 | 4.14261893   | 1.42921837   |
| ENSRORG00000010208  | vps26a         | VPS26, retromer complex component A [Source:ZFIN;Acc:ZDB-GENE-040426-1108]                                  | -5.100755065 | 0.765753898  | 6.109381597  | 0.243357319  |
| ENSRORG00000008283  | srrd           | SRR1 domain containing [Source:ZFIN;Acc:ZDB-GENE-060825-269]                                                | -3.852781052 | 0.361036437  | 3.557772135  | -0.655560767 |
| ENSRORG00000007375  | -              | -                                                                                                           | -1.321070975 | 1.706210574  | 5.466661793  | 2.438665082  |
| ENSRORG00000010845  | -              | -                                                                                                           | -3.054610541 | -0.772913836 | 5.181913869  | 2.906696965  |
| ENSRORG00000002369  | bnip1b         | vesicle transport protein SEC20 [Source:NCBI; gene:Acc:101155624]                                           | -1.378914    | -0.145380097 | 3.83823258   | 2.605182947  |
| ENSRORG00000010559  | lts1           | leucine zipper, putative tumor suppressor 1 [Source:ZFIN;Acc:ZDB-GENE-081104-431]                           | 0.990878684  | 3.252971439  | 3.509368597  | 1.247761425  |
| ENSRORG00000003347  | -              | -                                                                                                           | -2.993711048 | 0.496493082  | 5.040084698  | 1.550365779  |
| ENSRORG00000017929  | -              | -                                                                                                           | -1.305747675 | 2.594350523  | 6.8149764    | 2.913411687  |
| ENSRORG00000007453  | DNAJA4         | DnaJ heat shock protein family (Hsp40) member A4 [Source:HGN; Symbol:Acc:HGN-14885]                         | -5.057866323 | -0.037363316 | 5.367514677  | 0.002770002  |
| ENSRORG00000017604  | -              | -                                                                                                           | -1.819253532 | -0.615910445 | 3.48935419   | 2.286497586  |
| ENSRORG00000010746  | -              | -                                                                                                           | -0.441291664 | 1.002679313  | 3.265145844  | 1.821659964  |
| ENSRORG00000001232  | hfdz1          | SFT2 domain containing 1 [Source:ZFIN;Acc:ZDB-GENE-040426-1350]                                             | -2.59356092  | 1.153159776  | 4.872733234  | 1.081031924  |
| ENSRORG00000020256  | dun1jds        | DCN1 like protein 5 [Source:NCBI; gene:Acc:101185657]                                                       | -3.12173969  | 0.318423524  | 4.676158823  | 1.2264778    |
| ENSRORG00000005104  | anrp25         | small nuclear ribonucleoprotein 25 [Source:ZFIN;Acc:ZDB-GENE-050417-179]                                    | -4.518718717 | 1.065034663  | 5.153034671  | -0.06396216  |
| ENSRORG00000011823  | -              | -                                                                                                           | -8.239279046 | 0.761335175  | 5.355117936  | -3.64501184  |
| ENSRORG00000016960  | mpf54          | mitochondrial ribosomal protein L54 [Source:NCBI; gene:Acc:101160060]                                       | -2.223990131 | 1.214131228  | 3.168005622  | -0.26959964  |
| ENSRORG00000017216  | -              | -                                                                                                           | -4.615830937 | 1.585326886  | 5.404938937  | -0.795435395 |
| ENSRORG00000012015  | si-ch211-11k13 | si-ch211-11k13.4 [Source:ZFIN;Acc:ZDB-GENE-070912-22]                                                       | -5.276535043 | -0.195648531 | 3.572871011  | -1.507530685 |
| ENSRORG00000006478  | -              | -                                                                                                           | -1.456091785 | 0.686641125  | 3.106898481  | 0.964850703  |
| ENSRORG00000013541  | -              | -                                                                                                           | -0.291833172 | 0.907769707  | 3.135271088  | 1.936856253  |
| ENSRORG00000009378  | snx24          | sorting nexin 24 [Source:NCBI; gene:Acc:101172180]                                                          | -2.468847738 | 1.273783471  | 4.289391688  | 0.542924507  |
| ENSRORG000000015748 | cnqa3a         | cyclic nucleotide gated channel alpha 3a [Source:ZFIN;Acc:ZDB-GENE-090611-21]                               | -5.46290788  | -0.031827161 | 6.94205468   | 1.503401139  |
| ENSRORG00000021281  | Rf00026        | U6 small nuclear RNA [Source:NCBI; gene:Acc:101162770]                                                      | -0.580612688 | 1.83104772   | 5.130889704  | 2.739718251  |
| ENSRORG00000007443  | exoc2          | exosome component 2 [Source:NCBI; gene:Acc:101162770]                                                       | -3.171039957 | 0.380144539  | 3.835414818  | 0.284714977  |
| ENSRORG00000003368  | RPA1 (1 of ma  | replication protein A1 [Source:HGN; Symbol:Acc:HGN-10289]                                                   | -0.647491774 | 0.284506605  | 3.582500953  | 2.650987236  |
| ENSRORG00000004450  | wrap73         | WD repeat containing, antisense to TP73 [Source:NCBI; gene:Acc:101188286]                                   | -0.609298861 | -0.023277768 | 3.302816773  | 2.717280572  |
| ENSRORG00000012043  | taf1a          | TATA box binding protein (TBP)-associated factor, RNA polymerase I, A [Source:ZFIN;Acc:ZDB-GENE-041014-272] | -4.447460052 | 1.206136551  | 4.689143178  | -0.963968812 |
| ENSRORG00000012750  | setb           | protein SET [Source:NCBI; gene:Acc:101171505]                                                               | -2.433797037 | 0.436545408  | 3.079695689  | 0.209838127  |
| ENSRORG00000017693  | -              | -                                                                                                           | -4.571258789 | 0.483022881  | 4.32881891   | -0.72497398  |
| ENSRORG00000017740  | -              | -                                                                                                           | -3.94859536  | 0.133919648  | 5.371705035  | 1.388917894  |
| ENSRORG00000013412  | dnosp2         | dnocriptase 2 [Source:ZFIN;Acc:ZDB-GENE-120419-2]                                                           | -2.290389056 | -0.35650366  | 3.828902033  | 0.985499675  |
| ENSRORG00000001212  | -              | -                                                                                                           | -15.62879808 | 1.701940505  | 16.54778347  | -0.782965126 |
| ENSRORG00000014226  | med18          | mediator complex subunit 18 [Source:NCBI; gene:Acc:101165897]                                               | -2.418133571 | -0.013556545 | 3.362461844  | 0.958369484  |
| ENSRORG00000005117  | exoc10         | exosome component 10 [Source:NCBI; gene:Acc:101172813]                                                      | -2.539383228 | -0.283568584 | 3.728927427  | 1.47359765   |
| ENSRORG00000013980  | -              | -                                                                                                           | -10.13224266 | 4.863986355  | 15.953222726 | 0.957478594  |
| ENSRORG00000005597  | -              | -                                                                                                           | -4.338308864 | 0.381591162  | 3.848042059  | -0.871373315 |

|                     |               |                                                                                            |              |              |             |              |
|---------------------|---------------|--------------------------------------------------------------------------------------------|--------------|--------------|-------------|--------------|
| ENSORLG0000001815   | -             | -                                                                                          | -6.218742728 | 1.175775811  | 3.907499466 | -3.486534750 |
| ENSORLG0000000232   | mphosph6      | M-phase phosphoprotein 6 [Source:NCBI gene:Acc10117370]                                    | -1.710122057 | -0.212511877 | 3.065131723 | 1.568006482  |
| ENSORLG00000015955  | sp3b6         | splicing factor 3b subunit 6 [Source:NCBI gene:Acc101163944]                               | -4.797507178 | 0.779991299  | 7.066889818 | 1.489875074  |
| ENSORLG00000012697  | uqcrb         | cytochrome b-c1 complex subunit 7 [Source:NCBI gene:Acc101165157]                          | -4.552364701 | 2.412165623  | 6.768652971 | -0.195392633 |
| ENSORLG00000009342  | PDCD5         | programmed cell death 5 [Source:NCBI gene:Acc101170335]                                    | -1.28044675  | 1.228169022  | 3.507452461 | 0.999321442  |
| ENSORLG00000011018  | -             | -                                                                                          | -3.218315288 | 1.770815344  | 5.036416331 | 0.047713559  |
| ENSORLG00000006532  | -             | -                                                                                          | -2.714843648 | 0.305928252  | 4.360981025 | 1.337339795  |
| ENSORLG000000018131 | map3k19       | mitogen-activated protein kinase kinase kinase 19 [Source:ZFIN:Acc:ZDB-GENE-081104-149]    | 1.201866652  | 2.622266253  | 3.512549761 | 2.092635039  |
| ENSORLG00000001966  | chc1c1        | cysteine-rich hydrophobic domain 1 [Source:ZFIN:Acc:ZDB-GENE-030131-7763]                  | -0.949920067 | 0.179136338  | 3.448562476 | 2.319990912  |
| ENSORLG00000006704  | -             | -                                                                                          | -3.335176886 | 2.99473009   | 4.550834538 | -1.778870888 |
| ENSORLG00000003143  | -             | -                                                                                          | -5.238217287 | 0.776760753  | 6.995565745 | 0.981072186  |
| ENSORLG000000015969 | si.ch211-225b | si.ch211-225b10.3 [Source:ZFIN:Acc:ZDB-GENE-130531-53]                                     | -1.31798629  | -0.814746533 | 3.130702531 | 2.627947778  |
| ENSORLG00000006336  | -             | -                                                                                          | -5.209909194 | -0.565959863 | 3.798238402 | -0.845226057 |
| ENSORLG00000002362  | bod1          | biorientation of chromosomes in cell division 1 [Source:ZFIN:Acc:ZDB-GENE-060810-163]      | -2.947933059 | -0.152766698 | 4.565005901 | 1.77032503   |
| ENSORLG00000003485  | ap1s2         | adaptor-related protein complex 1, sigma 2 subunit [Source:ZFIN:Acc:ZDB-GENE-030131-5448]  | 0.251848934  | 1.162740075  | 3.310820069 | 2.40041383   |
| ENSORLG00000015691  | ER3P1         | immediate early response 3-interacting protein 1 [Source:NCBI gene:Acc101155933]           | -2.081471837 | 0.839199914  | 3.501867559 | 0.581680615  |
| ENSORLG00000014700  | -             | -                                                                                          | -5.176812119 | 0.197269692  | 4.072278253 | -1.841318581 |
| ENSORLG00000014954  | sem4de        | semaphorin 4e [Source:ZFIN:Acc:ZDB-GENE-990715-7]                                          | -0.310894745 | 0.714022271  | 3.038422008 | 2.014820035  |
| ENSORLG00000016530  | -             | -                                                                                          | 17.52723085  | 16.35163127  | 4.372503582 | 1.551334838  |
| ENSORLG00000008811  | kjun1d1       | DNK1-like protein 1 [Source:NCBI gene:Acc101167649]                                        | -2.854352473 | 2.658692218  | 5.741500398 | 0.228940325  |
| ENSORLG00000012852  | zgc111986     | chromosome 11 C6orf62 homolog [Source:NCBI gene:Acc101167123]                              | 0.356598952  | 1.794238576  | 4.025341432 | 2.588184651  |
| ENSORLG00000017518  | chn1          | chmerin 1 [Source:ZFIN:Acc:ZDB-GENE-040426-193d]                                           | 0.488724994  | 2.874070277  | 4.439849934 | 2.034988834  |
| ENSORLG00000014060  | fbx1          | rtnn-box 1 [Source:NCBI gene:Acc101170590]                                                 | -2.417006307 | 0.787964822  | 4.194706813 | 0.950220736  |
| ENSORLG00000014153  | -             | -                                                                                          | -0.407530021 | 1.11434332   | 4.455108916 | 2.974239961  |
| ENSORLG00000005011  | -             | -                                                                                          | -15.40402623 | 1.001076845  | 18.08953977 | 1.68527682   |
| ENSORLG00000005979  | saal1         | serum amyloid A-like 1 [Source:ZFIN:Acc:ZDB-GENE-040426-72s]                               | -2.930909188 | -0.391781029 | 4.681009866 | 2.142366902  |
| ENSORLG00000012528  | -             | -                                                                                          | -0.550199452 | 1.214251615  | 3.036836887 | 1.272870884  |
| ENSORLG00000006817  | -             | -                                                                                          | -2.552929673 | -0.252082823 | 4.13901895  | 0.836440111  |
| ENSORLG00000005711  | trn14a        | thioredoxin like 4A [Source:NCBI gene:Acc101166315]                                        | -3.645797629 | 1.450105559  | 5.523309762 | 0.428947775  |
| ENSORLG00000007900  | elocb         | elolan C [Source:NCBI gene:Acc101173584]                                                   | -6.285496008 | 2.301282256  | 7.560492667 | -1.02800732  |
| ENSORLG00000010415  | dhps          | deoxyhypusine synthase [Source:NCBI gene:Acc101170086]                                     | -0.780682412 | 0.709920319  | 3.087432899 | 1.597315078  |
| ENSORLG00000011717  | ube2d4        | ubiquitin-conjugating enzyme E2 D4 [Source:NCBI gene:Acc101172587]                         | -8.126296093 | 1.785496675  | 10.50009179 | 0.588789056  |
| ENSORLG00000006138  | glod5         | glyoxalase domain containing 5 [Source:NCBI gene:Acc101168784]                             | -2.235972122 | 0.414378465  | 3.311243411 | 0.661377582  |
| ENSORLG00000016132  | -             | -                                                                                          | -3.953722807 | -0.228806115 | 3.493768534 | -0.230674722 |
| ENSORLG00000002469  | bloc16        | biogenesis of lysosomal organelles complex 1 subunit 6 [Source:NCBI gene:Acc101172565]     | -2.233801152 | 0.252711894  | 3.383876374 | 0.897848537  |
| ENSORLG00000016957  | lms32a        | family with sequence similarity 32 member A [Source:NCBI gene:Acc101159813]                | -1.512077092 | 0.547512417  | 5.00650013  | 2.947395437  |
| ENSORLG00000003570  | cnops         | centriole protein 5 [Source:NCBI gene:Acc101172587]                                        | -1.268453167 | 0.418549021  | 3.302617423 | 1.6181160231 |
| ENSORLG000000021348 | rf00309       | small nucleolar RNA snR60/Z15/Z30/Z193/017 [Source:NCBI gene:Acc111947415]                 | -3.035678495 | 2.791306435  | 6.289618997 | 0.463122092  |
| ENSORLG00000015281  | asdurf        | asparagine synthetase domain containing 1 [Source:NCBI gene:Acc111946260]                  | -2.139004391 | 0.846828407  | 3.139863007 | 0.154514934  |
| ENSORLG00000006055  | ngn1          | neugrin, neurite outgrowth associated [Source:NCBI gene:Acc101159100]                      | -2.960001426 | -0.184916011 | 3.131620781 | 0.357020315  |
| ENSORLG00000006670  | nuc2a         | nucleolin 2a [Source:ZFIN:Acc:ZDB-GENE-030826-14]                                          | 0.274414246  | 2.014081351  | 3.554687477 | 1.815505523  |
| ENSORLG00000002350  | trmt112       | RNA methyltransferase subunit 11-2 [Source:NCBI gene:Acc101155291]                         | -3.514505213 | 0.563871183  | 4.217483251 | 0.139591653  |
| ENSORLG00000015322  | -             | -                                                                                          | -2.792808069 | -0.291335566 | 3.644892092 | 1.14390523   |
| ENSORLG00000012129  | bnp3a         | BCL2 interacting protein 3 like a [Source:ZFIN:Acc:ZDB-GENE-030131-228b]                   | -1.608105996 | 1.297903877  | 3.683684803 | 0.778159858  |
| ENSORLG00000010326  | -             | -                                                                                          | -3.855240855 | 0.058483573  | 6.14846535  | 2.505224169  |
| ENSORLG00000015994  | spcs1         | signal peptidase complex subunit 1 [Source:NCBI gene:Acc101160314]                         | -2.237033199 | 1.518120435  | 3.510077138 | -0.244591598 |
| ENSORLG00000013809  | bud31         | BUD31 homolog [Source:NCBI gene:Acc101174835]                                              | -3.172086108 | 1.901884346  | 5.01978522  | -0.053700292 |
| ENSORLG00000012977  | -             | -                                                                                          | -1.04528621  | 1.580045053  | 4.190945049 | 1.566098706  |
| ENSORLG00000017157  | zbtb8os       | zinc finger and BTB domain containing 8 opposite strand [Source:NCBI gene:Acc101154822]    | -1.724370183 | 2.089982931  | 4.041873243 | 0.228005059  |
| ENSORLG00000014275  | yju2          | YJU2 splicing factor homolog [Source:ZFIN:Acc:ZDB-GENE-040426-841]                         | -4.236341554 | -0.207559588 | 3.876489309 | -0.151807947 |
| ENSORLG00000017897  | pp2r3c        | protein phosphatase 2 regulatory subunit B, gamma [Source:ZFIN:Acc:ZDB-GENE-040426-715]    | -3.467519098 | 1.083938132  | 5.541415672 | 0.990443073  |
| ENSORLG00000016171  | -             | -                                                                                          | -0.459516024 | 0.253563735  | 3.7462799   | 2.562033147  |
| ENSORLG00000004653  | psmh3         | proteasome (prosome, macropain) assembly chaperone 3 [Source:ZFIN:Acc:ZDB-GENE-040718-282] | -1.925350354 | 1.508106777  | 4.136207047 | 0.703235887  |
| ENSORLG00000016959  | -             | -                                                                                          | -3.492960278 | 1.782183369  | 7.549723177 | 2.274529036  |
| ENSORLG00000010194  | -             | -                                                                                          | -0.285369154 | 0.87249306   | 3.027138714 | 1.861764472  |
| ENSORLG00000006361  | fen1          | flap structure-specific endonuclease 1 [Source:NCBI gene:Acc101158562]                     | -1.307069428 | 0.245137358  | 3.227722202 | 1.676000179  |
| ENSORLG00000016318  | gstz1         | glutathione S-transferase zeta 1 [Source:NCBI gene:Acc101162471]                           | -4.853594658 | 1.113728839  | 5.151882633 | -0.814895722 |
| ENSORLG00000002795  | mrrp317       | mitochondrial ribosomal protein S17 [Source:NCBI gene:Acc101159284]                        | -4.847055561 | 1.50218494   | 6.607078594 | 0.25832056   |
| ENSORLG00000004007  | -             | -                                                                                          | 11.77026745  | 13.87572238  | 3.924250737 | 1.819213674  |
| ENSORLG00000000931  | ube2a         | ubiquitin-conjugating enzyme E2 A [Source:NCBI gene:Acc101158022]                          | -3.438124818 | 2.957552634  | 5.749674532 | -0.645517655 |
| ENSORLG000000101757 | -             | -                                                                                          | -0.551698662 | 1.782070096  | 5.185643986 | 2.862368451  |
| ENSORLG00000016425  | cow6b2        | cytochrome c oxidase subunit VIb polypeptide 2 [Source:ZFIN:Acc:ZDB-GENE-040426-1566]      | 0.853045833  | 1.202931958  | 3.100161655 | 2.749760545  |
| ENSORLG00000005635  | eeflakmt2     | EEFLA lysine methyltransferase 2 [Source:NCBI gene:Acc101168144]                           | -2.476001436 | 2.91850206   | 4.82439427  | -0.569624386 |
| ENSORLG00000010369  | vasna         | vasonin a [Source:ZFIN:Acc:ZDB-GENE-050622-43]                                             | 0.015335055  | 2.872715397  | 3.172788268 | 0.316393076  |
| ENSORLG00000004486  | -             | -                                                                                          | 10.25542992  | 14.39966378  | 5.501806416 | 1.35804543   |
| ENSORLG00000012749  | PSMG4         | proteasome assembly chaperone 4 [Source:NCBI gene:Acc101161967]                            | -1.470861855 | 0.538801309  | 3.207057046 | 1.197878761  |
| ENSORLG00000005841  | C18orf32      | chromosome 18 open reading frame 32 [Source:HGNC Symbol:Acc:HGNC:31690]                    | -6.070982275 | 2.019765498  | 8.206985912 | 0.116722805  |
| ENSORLG00000012281  | prn1          | DNA primase subunit 1 [Source:ZFIN:Acc:ZDB-GENE-990603-6]                                  | -0.999085144 | 0.632183941  | 3.033628565 | 1.402844379  |
| ENSORLG00000004680  | glod4         | glyoxalase domain containing 4 [Source:ZFIN:Acc:ZDB-GENE-040912-38]                        | -5.617667491 | 0.105636974  | 4.78991174  | -0.932908114 |
| ENSORLG00000010302  | lmbd1         | LMBR1 domain containing 1 [Source:ZFIN:Acc:ZDB-GENE-041212-38]                             | -2.773771403 | 0.706724449  | 3.980636093 | 0.500625224  |
| ENSORLG00000015136  | RANBP1        | RAN binding protein 1 [Source:NCBI gene:Acc101155441]                                      | -2.934933334 | 0.926723088  | 3.644381316 | -0.216790234 |
| ENSORLG0000000243   | -             | -                                                                                          | -2.364381492 | 1.747701056  | 5.044689853 | 0.933092964  |
| ENSORLG00000011383  | coa3a         | cytochrome C oxidase assembly factor 3a [Source:ZFIN:Acc:ZDB-GENE-060810-187]              | -3.387111035 | 0.808952363  | 3.400520672 | -0.79505775  |
| ENSORLG000000021634 | RF01299       | small nucleolar RNA SNORD2 [Source:NCBI gene:Acc111949143]                                 | 5.718635616  | 13.9284351   | 10.92935521 | 2.72002741   |

|                     |               |                                                                                                                                                         |              |              |             |              |
|---------------------|---------------|---------------------------------------------------------------------------------------------------------------------------------------------------------|--------------|--------------|-------------|--------------|
| ENSORLG0000010447   | zef3b         | cugbp. Elav-like family member 3b<br>[Source:ZFIN;Acc:ZDB-GENE-110408-50]                                                                               | -0.70658883  | 1.24441808   | 3.505144069 | 1.554651894  |
| ENSORLG0000007712   | znptq         | N-acetylglucosamine-1-phosphatase transferase gamma subunit [Source:ZFIN;Acc:ZDB-GENE-040625-18]                                                        | -7.845821223 | 1.943314541  | 8.0268977   | -1.761747927 |
| ENSORLG0000001586   | lph           | LLP homolog, long-term synaptic facilitation factor [Source:NCBI;gene:Acc:101155243]                                                                    | -6.921206465 | 0.374877684  | 6.991446606 | -0.304152446 |
| ENSORLG00000017208  | sst           | Sjogren syndrome antigen B (autoantigen La) [Source:ZFIN;Acc:ZDB-GENE-030131-223]                                                                       | -5.254284324 | 0.67864917   | 5.641611282 | -0.290837535 |
| ENSORLG00000006325  | usp39         | ubiquitin specific peptidase 39 [Source:NCBI;gene:Acc:101161161]                                                                                        | -3.323488914 | 0.400787331  | 3.508618651 | -0.215174444 |
| ENSORLG00000006428  | -             | -                                                                                                                                                       | -3.202274475 | 0.947206398  | 4.608339365 | 0.459345338  |
| ENSORLG00000016887  | -             | -                                                                                                                                                       | 12.61495572  | 14.31970561  | 3.15055519  | 1.448468674  |
| ENSORLG00000011929  | -             | -                                                                                                                                                       | -3.393179296 | -0.77265401  | 3.69817745  | 1.08364728   |
| ENSORLG00000010497  | lysd3         | Ly5M, putative peptidoglycan-binding domain containing 3 [Source:ZFIN;Acc:ZDB-GENE-040625-88]                                                           | -3.380152139 | 0.818107177  | 3.783079966 | -0.414694359 |
| ENSORLG00000012275  | MRPL51        | mitochondrial ribosomal protein L51 [Source:NCBI;gene:Acc:101173004]                                                                                    | -2.837711389 | 0.75953212   | 3.737041027 | 0.140282574  |
| ENSORLG00000012228  | bxndc9        | thioredoxin domain containing 9 [Source:NCBI;gene:Acc:101166757]                                                                                        | -2.034960074 | 1.07118929   | 4.788336104 | 1.662671498  |
| ENSORLG00000021421  | rR00619       | UGatac minor spliceosomal RNA [Source:NCBI;gene:Acc:111947485]                                                                                          | -4.683410599 | 0.817586989  | 7.167127298 | 1.666614866  |
| ENSORLG00000004878  | ubfd1         | ubiquitin family domain containing 1 [Source:NCBI;gene:Acc:101171414]                                                                                   | -4.132480774 | 0.924475632  | 6.527780575 | 1.471308909  |
| ENSORLG00000014031  | chnep1r1      | CTD nuclear envelope phosphatase 1 regulatory subunit 1 [Source:NCBI;gene:Acc:101165466]                                                                | -4.147202646 | 1.843014307  | 5.824578965 | -0.165153228 |
| ENSORLG00000012821  | ctm5          | dynactin subunit 5 [Source:NCBI;gene:Acc:101164808]                                                                                                     | -2.290208754 | 0.815749193  | 4.419255551 | 1.313962028  |
| ENSORLG00000004347  | tas1r2a       | Oryzias latipes taste receptor, type 1, member 2a (tas1r2a), mRNA [Source:RefSeq; mRNA:Acc:NM_001104958]                                                | -3.813760597 | 1.408489676  | 5.434345672 | 0.212581537  |
| ENSORLG00000003149  | -             | -                                                                                                                                                       | -2.346426362 | -0.257561666 | 4.263739586 | 2.175359692  |
| ENSORLG000000013767 | -             | putative uncharacterized protein DDB_G0292636 [Source:NCBI;gene:Acc:105355509]                                                                          | -6.256978795 | 1.029562983  | 5.686071339 | -1.599985495 |
| ENSORLG00000011556  | -             | -                                                                                                                                                       | -3.526109848 | 0.373396666  | 4.988453117 | 1.089431407  |
| ENSORLG00000006323  | prkacba       | protein kinase cAMP-activated catalytic subunit beta [Source:NCBI;gene:Acc:101180309]                                                                   | -0.007179718 | 1.66285217   | 3.896308376 | 2.226761122  |
| ENSORLG00000006663  | -             | uncharacterized LOC101162937 [Source:NCBI;gene:Acc:101162937]                                                                                           | -2.956618666 | 0.158161087  | 3.811310471 | 0.697015552  |
| ENSORLG000000013934 | psmd12        | proteasome 26S subunit, non-ATPase 12 [Source:ZFIN;Acc:ZDB-GENE-030131-617]                                                                             | -1.663488784 | 0.076491133  | 3.167183256 | 1.427688422  |
| ENSORLG00000005485  | -             | -                                                                                                                                                       | -5.33544721  | 1.242242793  | 6.715244825 | 0.138040661  |
| ENSORLG00000004120  | -             | -                                                                                                                                                       | -4.124542024 | -0.624726061 | 4.375946662 | 0.838263328  |
| ENSORLG00000000696  | -             | -                                                                                                                                                       | 0.90189598   | 2.24889497   | 3.378952414 | 1.352413526  |
| ENSORLG00000003545  | -             | cytochrome c oxidase protein 20 homolog [Source:NCBI;gene:Acc:101155137]                                                                                | -3.230814802 | 0.894212865  | 3.79504815  | -0.329494272 |
| ENSORLG00000010609  | -             | -                                                                                                                                                       | -5.10257063  | 0.339314298  | 4.979418789 | 0.130331893  |
| ENSORLG000000014870 | cep57l1       | centrosomal protein 57, like 1 [Source:ZFIN;Acc:ZDB-GENE-040808-27]                                                                                     | -4.109410223 | -0.147147099 | 4.304281727 | 0.342503319  |
| ENSORLG000000003279 | -             | -                                                                                                                                                       | -0.684935822 | 1.832777739  | 4.251670433 | 1.734442036  |
| ENSORLG00000012635  | si.ch211-39k3 | si.ch211-39k3.2 [Source:ZFIN;Acc:ZDB-GENE-070705-180]                                                                                                   | -3.444104673 | 0.128475506  | 4.641199611 | 1.069104352  |
| ENSORLG000000013102 | erh           | enhancer of rudimentary homolog (Drosophila) [Source:ZFIN;Acc:ZDB-GENE-090415-57]                                                                       | -2.547739994 | 1.878895863  | 5.140217435 | 0.714067314  |
| ENSORLG00000003980  | surf6         | surfactant 6 [Source:ZFIN;Acc:ZDB-GENE-040426-1333]                                                                                                     | -2.633101159 | -0.04068463  | 3.62517466  | 1.03262477   |
| ENSORLG00000010552  | smn1          | survival of motor neuron 1, telomeric [Source:ZFIN;Acc:ZDB-GENE-090715-16]                                                                              | -3.28232611  | -0.04491632  | 3.37671887  | 0.140737098  |
| ENSORLG00000002509  | polb          | DNA polymerase beta [Source:NCBI;gene:Acc:101171171]                                                                                                    | -2.46063483  | 2.350328424  | 5.05945036  | 0.248973153  |
| ENSORLG000000018035 | rhov          | ras homolog family member V [Source:NCBI;gene:Acc:101188050]                                                                                            | -2.005001399 | -0.070410398 | 3.769865602 | 1.835779596  |
| ENSORLG00000017561  | hnmpa3        | heterogeneous nuclear ribonucleoprotein A3 [Source:ZFIN;Acc:ZDB-GENE-060224-11]                                                                         | -1.594490632 | 0.936303136  | 3.396043038 | 1.40575285   |
| ENSORLG00000009041  | -             | -                                                                                                                                                       | -5.194516478 | 1.645761961  | 5.253091615 | -1.588701238 |
| ENSORLG00000009352  | mindy3        | MINDY lysine 48 deubiquitinase 3 [Source:ZFIN;Acc:ZDB-GENE-061110-13]                                                                                   | -3.045780381 | 0.084161764  | 4.971539351 | 1.842082327  |
| ENSORLG00000006237  | apix          | actinixin [Source:NCBI;gene:Acc:101162025]                                                                                                              | -1.437064338 | 0.996756047  | 4.214064252 | 1.790728908  |
| ENSORLG00000005866  | gaf2h3        | general transcription factor IIF, polypeptide 3 [Source:ZFIN;Acc:ZDB-GENE-040718-302]                                                                   | -2.926044069 | 0.608932037  | 3.254289203 | -0.280202252 |
| ENSORLG00000006774  | tblcb         | tubulin folding cofactor B [Source:ZFIN;Acc:ZDB-GENE-030131-9296]                                                                                       | -5.462229941 | 1.04610739   | 7.206284373 | 0.698362499  |
| ENSORLG000000004869 | snarca1a      | SWI/SNF-related, matrix-associated actin-dependent regulator of chromatin, subfamily a, containing DEAD/H box 1 a [Source:ZFIN;Acc:ZDB-GENE-050622-489] | -0.7626727   | 0.440127971  | 3.019005708 | 1.816690021  |
| ENSORLG000000006176 | rtf2          | replication termination factor 2 [Source:ZFIN;Acc:ZDB-GENE-030131-4825]                                                                                 | -2.731512875 | 1.029738572  | 5.560500007 | 1.799733577  |
| ENSORLG00000001308  | NDCB2         | nucleobindin 2 [Source:HGNC;Symbol:Acc:HGNC:80048]                                                                                                      | -2.158565476 | -0.699224113 | 3.480239945 | 2.0233835    |
| ENSORLG000000006425 | -             | -                                                                                                                                                       | -2.315275164 | 1.99789082   | 6.780195537 | 2.477548561  |
| ENSORLG00000014924  | h3gal1a       | enhophilin A2 [Source:NCBI;gene:Acc:101161753]                                                                                                          | -1.267467968 | 0.364298105  | 3.271910563 | 1.640429335  |
| ENSORLG00000007823  | cyf5b         | cytochrome b5 [Source:NCBI;gene:Acc:101155998]                                                                                                          | -3.345407267 | 0.84491714   | 4.440764497 | 0.248505312  |
| ENSORLG00000016806  | -             | -                                                                                                                                                       | 0.16093937   | 0.77073644   | 3.064363154 | 2.455050614  |
| ENSORLG000000010887 | rs5b          | regulator of G protein signaling 5b [Source:ZFIN;Acc:ZDB-GENE-050417-359]                                                                               | -0.012540795 | 2.095430581  | 3.689395169 | 1.581910077  |
| ENSORLG00000007776  | stmate        | STM activating enhance [Source:ZFIN;Acc:ZDB-GENE-040426-1198]                                                                                           | -1.134640748 | 1.021065356  | 3.676224095 | 1.521003009  |
| ENSORLG000000004566 | -             | OTU deubiquitinase, ubiquitin aldehyde binding 2 [Source:NCBI;gene:Acc:101170908]                                                                       | -0.758144412 | 2.079226645  | 4.209143567 | 1.372257068  |
| ENSORLG000000012430 | churc1        | churchill domain containing 1 [Source:NCBI;gene:Acc:101169830]                                                                                          | -6.583393728 | 1.254262871  | 8.448534211 | 0.611361421  |
| ENSORLG00000011198  | casp8         | Oryzias latipes caspase-8 (cas8), mRNA [Source:RefSeq; mRNA:Acc:NM_001104788]                                                                           | -1.23796628  | 0.939311691  | 3.743752903 | 1.568960101  |
| ENSORLG000000007788 | -             | mediator complex subunit 26 [Source:NCBI;gene:Acc:101169339]                                                                                            | -3.649263023 | 0.868435855  | 5.155182303 | 0.63806144   |
| ENSORLG000000006871 | cuwdc2        | CUE domain containing 2 [Source:ZFIN;Acc:ZDB-GENE-030131-6283]                                                                                          | -0.102394548 | 1.339356252  | 3.592121709 | 2.150855516  |
| ENSORLG000000010951 | trove2        | TROVE domain family, member 2 [Source:ZFIN;Acc:ZDB-GENE-051113-300]                                                                                     | -2.083753402 | 0.250956014  | 3.169667458 | 0.835434002  |
| ENSORLG00000003065  | -             | -                                                                                                                                                       | -5.353101309 | 0.666844911  | 4.499040477 | -1.520376526 |
| ENSORLG000000008669 | s3gal3        | ST3 beta-galactosidase alpha 2-3-sialyltransferase 3 [Source:NCBI;gene:Acc:100049527]                                                                   | -0.41277524  | 1.210846924  | 3.35729075  | 1.734153717  |
| ENSORLG000000010589 | ccsd84        | coiled-coil domain containing 84 [Source:ZFIN;Acc:ZDB-GENE-080529-1174]                                                                                 | -1.216561229 | 2.354555709  | 4.888977603 | 1.318345584  |
| ENSORLG000000014684 | noi12         | nucleolar protein 12 [Source:ZFIN;Acc:ZDB-GENE-040426-1035]                                                                                             | -5.603503032 | 2.384954716  | 4.305279512 | -3.682691849 |
| ENSORLG000000001012 | ptg1          | pituitary tumor-transforming 1 [Source:NCBI;gene:Acc:101169111]                                                                                         | -8.926557574 | 0.267358835  | 8.082143087 | -1.111288266 |
| ENSORLG000000012991 | lam8a1a       | family with sequence similarity 8, member A1a [Source:ZFIN;Acc:ZDB-GENE-141216-66]                                                                      | -0.702164749 | 1.019125515  | 3.573749642 | 1.852944349  |
| ENSORLG000000014184 | atps1b        | ATP synthase 1 [Source:NCBI;gene:Acc:101165095]                                                                                                         | -2.551898782 | -0.381298097 | 3.057938433 | 0.887827538  |
| ENSORLG000000003623 | birc5a        | baculoviral IAP repeat-containing protein 5.2 [Source:NCBI;gene:Acc:101155061]                                                                          | -1.53243842  | 0.561356794  | 3.78497231  | 1.691662077  |
| ENSORLG000000014347 | mecr          | mitochondrial trans-2-enoyl-CoA reductase [Source:ZFIN;Acc:ZDB-GENE-050417-389]                                                                         | -2.865148907 | -0.103434854 | 3.406675133 | 0.64544623   |
| ENSORLG000000003830 | -             | gap junction beta-6 protein-like [Source:NCBI;gene:Acc:101165708]                                                                                       | -2.041798556 | 0.006844919  | 3.204842709 | 1.15668357   |
| ENSORLG00000001189  | -             | -                                                                                                                                                       | -0.780873015 | 1.439462132  | 4.076938587 | 1.857088927  |
| ENSORLG000000013826 | -             | -                                                                                                                                                       | -5.462413999 | 0.779206169  | 5.494535695 | -0.746611732 |
| ENSORLG000000008977 | kbp4          | FK506 binding protein 4 [Source:ZFIN;Acc:ZDB-GENE-030131-514]                                                                                           | -2.705385271 | 0.718664536  | 5.9310236   | 2.50745887   |

|                      |                 |                                                                                                                                                     |              |              |             |              |
|----------------------|-----------------|-----------------------------------------------------------------------------------------------------------------------------------------------------|--------------|--------------|-------------|--------------|
| ENSORLG00000008266   | zpc162879       | zpc162879 [Source:ZFIN;Acc:ZDB-GENE-070424-92]                                                                                                      | -2.286620065 | -0.197762284 | 4.961503193 | 2.873130319  |
| ENSORLG00000017612   | higd1a          | HIG1 hypoxia inducible domain family member 1A [Source:ZFIN;Acc:ZDB-GENE-030826-15]                                                                 | -2.047173215 | 1.878897945  | 3.246050936 | -0.67953501  |
| ENSORLG00000001806   | -               | -                                                                                                                                                   | -2.854559101 | 0.714607847  | 4.405180056 | 0.836497759  |
| ENSORLG00000002086   | -               | -                                                                                                                                                   | -2.754272533 | 0.756628619  | 3.624668105 | 0.113102036  |
| ENSORLG00000003241   | -               | -                                                                                                                                                   | 0.030282911  | 0.815811154  | 3.185019177 | 2.572269331  |
| ENSORLG00000004706   | bxndc17         | thioredoxin domain containing 17 [Source:NCBI; gene:Acc:101163188]                                                                                  | -4.266105383 | 2.225371642  | 5.379858717 | -1.11113327  |
| ENSORLG00000000910   | cox7c           | cytochrome c oxidase, subunit VIIc [Source:ZFIN;Acc:ZDB-GENE-030131-8062]                                                                           | -3.088681254 | 1.676525451  | 5.344236879 | 0.579278972  |
| ENSORLG00000006329   | -               | -                                                                                                                                                   | -5.07335438  | -0.109682769 | 5.263578455 | -0.679607708 |
| ENSORLG000000017679  | BRMS1L (1 of 4) | breast cancer metastasis-suppressor 1 like [Source:HGNC; Symbol:Acc:HGNC:20512]                                                                     | -2.405887235 | 0.238428258  | 3.476980416 | 0.833149874  |
| ENSORLG000000011487  | efsa2 (1 of 4)  | eukaryotic translation initiation factor 5A-1 [Source:NCBI; gene:Acc:101166426]                                                                     | -1.240496163 | 0.464616099  | 3.215539965 | 1.510912713  |
| ENSORLG000000016404  | -               | -                                                                                                                                                   | -3.533667894 | 1.049863835  | 5.077488094 | 0.494418888  |
| ENSORLG000000007116  | rad18           | RAD18 E3 ubiquitin protein ligase [Source:ZFIN;Acc:ZDB-GENE-040426-745]                                                                             | -3.603209153 | -0.0947212   | 4.293021597 | 0.7850188    |
| ENSORLG000000012615  | yps28           | YPS28; ESCRT I subunit [Source:NCBI; gene:Acc:101164188]                                                                                            | -2.360391284 | 2.213912004  | 6.240864168 | 1.667045473  |
| ENSORLG000000016773  | -               | -                                                                                                                                                   | -2.565152027 | 0.106981741  | 3.870300049 | 1.198651748  |
| ENSORLG000000005437  | bora            | bora, aurora kinase A activator [Source:ZFIN;Acc:ZDB-GENE-041114-165]                                                                               | -2.625219392 | -0.243877485 | 3.399382552 | 1.018255558  |
| ENSORLG000000012689  | mtorf3          | mitochondrial transcription termination factor 3 [Source:ZFIN;Acc:ZDB-GENE-040718-359]                                                              | -3.799622676 | 1.168929142  | 3.999932225 | -0.96807345  |
| ENSORLG000000010947  | -               | -                                                                                                                                                   | -4.407977039 | -0.071653983 | 6.085718245 | 1.749929731  |
| ENSORLG000000090308  | zpc158254       | zpc158254 [Source:ZFIN;Acc:ZDB-GENE-070112-2222]                                                                                                    | 0.540257133  | 0.613761799  | 3.004855344 | 2.93163583   |
| ENSORLG000000004479  | mkx             | MLK, MAX dimerization protein [Source:ZFIN;Acc:ZDB-GENE-050222-316]                                                                                 | 0.914118217  | 1.991097299  | 3.701945213 | 2.625451011  |
| ENSORLG00000007217   | In3krp          | inositol kinase-3 kinase [Source:NCBI; gene:Acc:101163919]                                                                                          | -2.992084704 | 0.177037245  | 4.049163852 | 0.888652749  |
| ENSORLG00000004759   | -               | -                                                                                                                                                   | -4.650239842 | 2.735452147  | 5.833187575 | -1.552021315 |
| ENSORLG000000015819  | scnm1           | sodium channel modifier 1 [Source:ZFIN;Acc:ZDB-GENE-030131-415]                                                                                     | -4.351193756 | 0.199759794  | 4.567919399 | 0.01745041   |
| ENSORLG000000015951  | -               | -                                                                                                                                                   | 0.10190785   | 0.623194701  | 3.089854455 | 2.569052397  |
| ENSORLG000000006889  | piqp            | phosphatidylinositol glycan anchor biosynthesis class P [Source:NCBI; gene:Acc:101157891]                                                           | -4.163596122 | 2.52244235   | 6.621640556 | -0.063900899 |
| ENSORLG000000008289  | tmem107         | transmembrane protein 107 [Source:ZFIN;Acc:ZDB-GENE-040426-2294]                                                                                    | -2.612411433 | 0.297827788  | 4.183011562 | 1.273302277  |
| ENSORLG00000009202   | dic3se4         | dic3se4 [Source:ZFIN;Acc:ZDB-GENE-050417-407]                                                                                                       | -1.391390819 | -0.16324886  | 3.107761539 | 1.880104243  |
| ENSORLG000000016304  | -               | -                                                                                                                                                   | -17.36947262 | 0.790613657  | 17.89632582 | -0.263248981 |
| ENSORLG000000011061  | efcab2          | EF-hand calcium binding domain 2 [Source:ZFIN;Acc:ZDB-GENE-070521-5]                                                                                | -5.938839128 | 1.400538041  | 8.499299702 | 1.160407762  |
| ENSORLG000000011222  | -               | -                                                                                                                                                   | -2.812828246 | 0.857132308  | 5.054996111 | 1.385521468  |
| ENSORLG000000005384  | arpp19b         | cAMP-regulated phosphoprotein 19b [Source:ZFIN;Acc:ZDB-GENE-040426-930]                                                                             | -0.299999053 | 0.589942521  | 3.172830894 | 2.287374342  |
| ENSORLG000000011798  | -               | -                                                                                                                                                   | -1.390990076 | -0.279602893 | 3.623196138 | 2.512393919  |
| ENSORLG00000007041   | asf1ba          | histone chaperone asf1B-8 [Source:NCBI; gene:Acc:101163979]                                                                                         | -4.468171993 | -0.018238645 | 4.970886136 | 0.521437899  |
| ENSORLG000000016505  | itppl1          | TATA-box binding protein like 1 [Source:NCBI; gene:Acc:101172784]                                                                                   | 0.185378396  | 1.007980498  | 3.046596802 | 2.224475091  |
| ENSORLG00000006641   | si:dkey-210j14  | si:dkey-210j14.3 [Source:ZFIN;Acc:ZDB-GENE-131121-88]                                                                                               | -3.347788031 | 0.759175178  | 3.226654708 | -0.873823208 |
| ENSORLG000000008295  | bcap29          | B cell receptor associated protein 29 [Source:NCBI; gene:Acc:101172971]                                                                             | -1.270816986 | 0.865308543  | 3.964676599 | 1.829036033  |
| ENSORLG000000008131  | zmat5           | zinc finger matrin-type 5 [Source:NCBI; gene:Acc:101165408]                                                                                         | -4.094515235 | 1.169379299  | 4.78960112  | -0.473808431 |
| ENSORLG000000015921  | -               | -                                                                                                                                                   | -5.310208896 | 0.585487885  | 5.225797169 | -0.669414306 |
| ENSORLG000000002351  | cops2           | COP9 signalosome subunit 2 [Source:ZFIN;Acc:ZDB-GENE-040625-15]                                                                                     | -6.387802188 | 2.366900522  | 8.973516339 | 0.21929869   |
| ENSORLG000000005638  | -               | -                                                                                                                                                   | -5.643619378 | 0.078390755  | 4.544630463 | -1.176894614 |
| ENSORLG000000009334  | PIN1            | peptidylprolyl cis/trans isomerase, NIMA-interacting 1 [Source:HGNC; Symbol:Acc:HGNC:8988]                                                          | -1.884128059 | -0.046659639 | 3.400041223 | 1.563057777  |
| ENSORLG000000012772  | ND3             | NADH dehydrogenase subunit 3 [Source:NCBI; gene:Acc:8054391]                                                                                        | -1.338170497 | 1.245086515  | 5.123848114 | 2.541077095  |
| ENSORLG000000017886  | -               | -                                                                                                                                                   | -4.121502995 | 0.139239884  | 4.599813388 | 0.343327477  |
| ENSORLG000000010867  | -               | -                                                                                                                                                   | -0.881733471 | 0.455921502  | 3.014888859 | 1.876897056  |
| ENSORLG000000008894  | tpst2           | tubulin polyglutamylation complex subunit 2 [Source:NCBI; gene:Acc:101166689]                                                                       | -1.555267561 | -0.292292125 | 3.034167631 | 1.708676984  |
| ENSORLG000000011305  | -               | -                                                                                                                                                   | -7.277335004 | -0.581857077 | 3.063744349 | -3.831248282 |
| ENSORLG000000010099  | -               | -                                                                                                                                                   | -0.276886501 | 1.886936756  | 3.280946458 | 1.121656291  |
| ENSORLG000000009231  | MSR81 (1 of 4)  | methionine sulfoxide reductase 81 [Source:HGNC; Symbol:Acc:HGNC:14133]                                                                              | -0.223372153 | 0.935538863  | 3.608897545 | 2.448471437  |
| ENSORLG000000013152  | -               | -                                                                                                                                                   | -1.275045166 | 0.831431549  | 3.99914017  | 1.893148715  |
| ENSORLG000000005653  | PRC1            | protein regulator of cytokinesis 1 [Source:HGNC; Symbol:Acc:HGNC:3941]                                                                              | -2.053990198 | -0.008157676 | 3.486516314 | 1.441168753  |
| ENSORLG000000004972  | ctbx3a          | chromobox homolog 3a (HP1 gamma homolog, Drosophila) [Source:ZFIN;Acc:ZDB-GENE-030131-1158]                                                         | -1.993785685 | 0.26116031   | 4.047655608 | 1.793194434  |
| ENSORLG000000014395  | -               | -                                                                                                                                                   | -5.798202634 | 0.546199644  | 6.983896419 | 0.63997958   |
| ENSORLG000000008743  | -               | -                                                                                                                                                   | -1.805620382 | -0.120849505 | 3.379148188 | 1.694962013  |
| ENSORLG000000009030  | rab6a           | RAB6A, member RAS oncogene family [Source:NCBI; gene:Acc:101163015]                                                                                 | -0.374204806 | 1.263847948  | 3.219256115 | 1.581688414  |
| ENSORLG000000015773  | apm1aa          | protein phosphatase, Mg <sup>2+</sup> /Mn <sup>2+</sup> dependent, 1Aa [Source:ZFIN;Acc:ZDB-GENE-991102-15]                                         | -1.049434887 | 1.07709902   | 3.281244889 | 1.155198845  |
| ENSORLG000000011795  | HIST1H4D        | histone H4 [Source:NCBI; gene:Acc:101170364]                                                                                                        | 2.61931013   | 3.483685858  | 3.604254377 | 2.740363372  |
| ENSORLG000000005753  | rik             | ribokinase kinase [Source:ZFIN;Acc:ZDB-GENE-081104-321]                                                                                             | -2.394300398 | 0.869322689  | 3.904847361 | 0.641709033  |
| ENSORLG000000021536  | Rf00443         | small nucleolar RNA, H/ACA box 27 [Source:HGNC; Symbol:Acc:HGNC:32617]                                                                              | -8.57561382  | 1.326298027  | 12.65252786 | 2.751105745  |
| ENSORLG0000000013085 | djpr6           | DiGeorge syndrome critical region gene 6 [Source:ZFIN;Acc:ZDB-GENE-040912-125]                                                                      | -6.418017847 | 2.472987565  | 8.036283882 | -0.852234355 |
| ENSORLG000000011850  | maseh2b         | methylase H2, subunit B [Source:ZFIN;Acc:ZDB-GENE-040426-1090]                                                                                      | -1.917915773 | 0.097788897  | 3.773666572 | 1.758446547  |
| ENSORLG000000005873  | RFESD (1 of 4)  | Rieske Fe-S domain containing [Source:HGNC; Symbol:Acc:HGNC:29567]                                                                                  | -2.068264851 | 0.082938787  | 4.338899921 | 2.186181068  |
| ENSORLG000000005429  | nae1            | neuraminidase E1 subunit 1 [Source:ZFIN;Acc:ZDB-GENE-040426-1552]                                                                                   | -2.051021888 | 0.39873815   | 3.821757403 | 1.3724824    |
| ENSORLG000000001867  | pdcd11          | PDZ domain containing 11 [Source:ZFIN;Acc:ZDB-GENE-040426-2544]                                                                                     | -1.309979446 | -0.160839547 | 3.412795157 | 2.264140033  |
| ENSORLG0000000002285 | snap29          | synaptosomal-associated protein 29 [Source:ZFIN;Acc:ZDB-GENE-041111-226]                                                                            | -1.590476203 | 0.434006819  | 3.17128231  | 1.687284248  |
| ENSORLG000000013500  | mrpl42          | mitochondrial ribosomal protein L42 [Source:ZFIN;Acc:ZDB-GENE-101014-1]                                                                             | -7.249400904 | -0.728804617 | 5.830011071 | -0.690100055 |
| ENSORLG000000013567  | -               | -                                                                                                                                                   | -0.833955622 | 1.327681446  | 4.033352705 | 1.872008286  |
| ENSORLG000000007506  | tpag11          | dolichyl phosphate (UDP-N-acetylglucosamine) N-acetylglucosaminophosphotransferase 1 (GlcNAc-1-P transferase) [Source:ZFIN;Acc:ZDB-GENE-060526-181] | -2.894124831 | -0.737082444 | 3.518498085 | 1.361940457  |
| ENSORLG000000000276  | -               | -                                                                                                                                                   | -0.470308988 | 0.970104834  | 3.711982117 | 2.22026312   |
| ENSORLG000000009641  | zpc171566       | zpc171566 [Source:ZFIN;Acc:ZDB-GENE-050309-193]                                                                                                     | -5.249898963 | 0.838713808  | 6.326024533 | 0.238878599  |
| ENSORLG000000010044  | -               | -                                                                                                                                                   | -0.230604253 | 2.619850268  | 4.255999426 | 1.406029916  |
| ENSORLG000000000961  | skp1            | S-phase kinase associated protein 1 [Source:NCBI; gene:Acc:101175667]                                                                               | -2.697687497 | 0.031748491  | 4.269075822 | 1.540124802  |
| ENSORLG000000012239  | nek2            | NIMA-related kinase 2 [Source:ZFIN;Acc:ZDB-GENE-040426-752]                                                                                         | -2.114506173 | 0.259459727  | 4.113101443 | 1.739620525  |
| ENSORLG000000002415  | -               | -                                                                                                                                                   | -1.347920524 | 2.281368064  | 3.018889411 | -0.609913497 |

|                     |                |                                                                                                              |              |              |             |              |
|---------------------|----------------|--------------------------------------------------------------------------------------------------------------|--------------|--------------|-------------|--------------|
| ENSORLG00000021323  | RF00026        | U6 scilicosomal RNA [Source:NCBI]                                                                            | 5.797901288  | 7.69686026   | 4.273424507 | 2.374988824  |
| ENSORLG00000002575  | casp9          | caspace 9, apoptosis-related cysteine peptidase [Source:ZFIN;Acc:ZDB-GENE-030825-5]                          | -2.062289205 | 0.068001997  | 3.028742799 | 0.899936285  |
| ENSORLG00000000166  | -              | -                                                                                                            | -2.552939471 | -0.540080631 | 3.837207112 | 1.82483961   |
| ENSORLG00000004394  | rab34a         | RAB34, member RAS oncogene family a [Source:ZFIN;Acc:ZDB-GENE-041010-197]                                    | -0.5439456   | 0.331252239  | 3.011087061 | 2.325374276  |
| ENSORLG000000014310 | medi10         | mediator complex subunit 10 [Source:NCBI gene:Acc:101158263]                                                 | -2.281949197 | 0.670602643  | 3.434200679 | 0.482133561  |
| ENSORLG000000007844 | uchl1          | ubiquitin carboxyl-terminal esterase L1 (ubiquitin thiolesterase) [Source:ZFIN;Acc:ZDB-GENE-0301131-3844]    | -4.34847434  | 0.109578916  | 3.066396865 | -1.391199656 |
| ENSORLG00000005718  | -              | -                                                                                                            | -2.314172503 | 0.911596049  | 3.542072932 | 0.316789844  |
| ENSORLG000000017573 | hxn1           | nucleoredox like 1 [Source:ZFIN;Acc:ZDB-GENE-070424-115]                                                     | -11.21231398 | 3.337042525  | 16.52332144 | 1.974365165  |
| ENSORLG00000008157  | psmd6          | proteasome 26S subunit, non-ATPase 6 [Source:NCBI gene:Acc:101172070]                                        | -2.460725997 | -0.407062091 | 3.61849877  | 1.565318061  |
| ENSORLG00000006872  | zgc-56095      | ferritin, heavy subunit [Source:NCBI]                                                                        | -3.482325621 | 1.658484438  | 3.674133819 | -1.46619142  |
| ENSORLG00000000872  | -              | -                                                                                                            | 0.149172625  | 2.12331033   | 3.597595495 | 1.623947607  |
| ENSORLG000000016225 | eroc1          | excision repair cross-complementation group 1 [Source:ZFIN;Acc:ZDB-GENE-040426-2806]                         | -5.055938166 | 1.11616255   | 6.547252072 | 0.376366256  |
| ENSORLG000000003582 | medi3a         | mediator complex subunit 19 [Source:NCBI gene:Acc:101157547]                                                 | -1.989216638 | -0.25686174  | 3.106801039 | 1.374931222  |
| ENSORLG00000004389  | sod1           | superoxide dismutase 1 [Source:NCBI gene:Acc:101170534]                                                      | -0.813356796 | 0.597185094  | 3.05041375  | 1.640356693  |
| ENSORLG00000007204  | arl16          | ADP ribosylation factor like G1Pase 16 [Source:NCBI gene:Acc:101169134]                                      | -6.156613057 | 1.022191395  | 7.729515241 | 0.552193257  |
| ENSORLG00000006904  | rexo4          | REX4 homolog, 3'-5' exonuclease [Source:ZFIN;Acc:ZDB-GENE-050411-124]                                        | -2.42781633  | 0.202556535  | 3.064666577 | 0.434778358  |
| ENSORLG000000010034 | ear2           | ELL-associated factor 2 [Source:NCBI gene:Acc:101154988]                                                     | -1.064030334 | 0.081229994  | 3.246245852 | 2.101470364  |
| ENSORLG00000006992  | -              | -                                                                                                            | -3.338313368 | -0.182366788 | 3.269959224 | 0.114500301  |
| ENSORLG000000014026 | tusc3          | tumor suppressor candidate 3 [Source:NCBI gene:Acc:101168184]                                                | -3.317643446 | 0.515058163  | 4.600234194 | 0.768017248  |
| ENSORLG000000009817 | slc50a1        | solute carrier family 50 (sugar efflux transporter), member 1 [Source:ZFIN;Acc:ZDB-GENE-050220-111]          | 0.469415031  | 1.371616459  | 3.060504836 | 2.158788405  |
| ENSORLG00000006244  | elf3b          | eukaryotic translation initiation factor 3, subunit B [Source:ZFIN;Acc:ZDB-GENE-040426-2900]                 | -3.866582526 | 0.895546973  | 4.91915607  | 0.158441399  |
| ENSORLG000000016539 | ttf5           | tubulin tyrosine ligase-like family, member 5 [Source:ZFIN;Acc:ZDB-GENE-100922-288]                          | -2.419315087 | -0.272088236 | 3.159576471 | 1.012834755  |
| ENSORLG000000034049 | AP3S1          | adaptor related protein complex 3 subunit sigma 1 [Source:NCBI gene:Acc:101158362]                           | -2.034859864 | 1.520430979  | 3.422560369 | -0.132245794 |
| ENSORLG000000010665 | ps19bp1        | ribosomal protein S19 binding protein 1 [Source:NCBI gene:Acc:101172879]                                     | -2.207905446 | 0.630132114  | 3.281904276 | 0.444351682  |
| ENSORLG00000009347  | -              | -                                                                                                            | -3.781728324 | 0.769487901  | 5.414181782 | 0.863453853  |
| ENSORLG00000006615  | -              | -                                                                                                            | -4.148138985 | 0.751638965  | 4.816583865 | -0.021732751 |
| ENSORLG000000008817 | -              | -                                                                                                            | -3.154102839 | 1.830482022  | 6.451401847 | 1.467302767  |
| ENSORLG000000016436 | h3hgr2         | SH3 domain binding glutamate-rich protein like 2 [Source:ZFIN;Acc:ZDB-GENE-040704-38]                        | -2.478744847 | 1.151635273  | 3.693485991 | 0.063591564  |
| ENSORLG00000009337  | UBL5           | ubiquitin like 5 [Source:HGNC;Symbol:Acc:HGNC:13738]                                                         | -4.788578985 | 1.229220539  | 6.312676767 | 0.295362337  |
| ENSORLG000000057930 | MME            | membrane metalloendopeptidase [Source:HGNC;Symbol:Acc:HGNC:7154]                                             | -6.419057143 | -0.395196817 | 3.027981449 | -2.99539399  |
| ENSORLG000000008529 | znf280d        | zinc finger protein 280D [Source:ZFIN;Acc:ZDB-GENE-030131-2260]                                              | -1.62017949  | 0.298745056  | 3.148974175 | 1.230534348  |
| ENSORLG000000014824 | mmps10         | mitochondrial ribosomal protein S10 [Source:ZFIN;Acc:ZDB-GENE-040914-39]                                     | -3.887032886 | 0.730902918  | 5.012004185 | 0.394553458  |
| ENSORLG000000017525 | hsp90aa1.1     | heat shock protein HSP 90-alpha 1 [Source:NCBI gene:Acc:101169258]                                           | -1.813166676 | 0.617346302  | 3.307216785 | 0.877188192  |
| ENSORLG00000002097  | -              | -                                                                                                            | -2.780813613 | 1.991284497  | 6.80859187  | 2.03697944   |
| ENSORLG00000001862  | -              | -                                                                                                            | -0.62385852  | 1.888816978  | 3.221360197 | 0.79907215   |
| ENSORLG00000000484  | -              | -                                                                                                            | -1.849347196 | 0.84947222   | 4.04032301  | 3.52971847   |
| ENSORLG00000005351  | -              | -                                                                                                            | -1.748984214 | -0.251423444 | 16.14214954 | -0.104289650 |
| ENSORLG000000015326 | ker1a          | keratocan [Source:ZFIN;Acc:ZDB-GENE-041210-165]                                                              | -0.147468781 | 2.032865748  | 4.991857243 | 2.812005513  |
| ENSORLG000000008750 | stk19          | serine/threonine kinase 19 [Source:ZFIN;Acc:ZDB-GENE-000616-11]                                              | -2.603396666 | 0.915854851  | 5.058274896 | 1.539500688  |
| ENSORLG000000012253 | si.ch211-22.13 | pre-mRNA-splicing factor CWC22 homolog [Source:NCBI gene:Acc:101168832]                                      | -3.973921999 | 1.094976555  | 4.19665809  | -0.871755535 |
| ENSORLG000000013915 | brdt           | bromodomain, testis-specific [Source:ZFIN;Acc:ZDB-GENE-030131-5928]                                          | -2.040165992 | 0.475984277  | 4.351843939 | 1.83617838   |
| ENSORLG000000003918 | slc35d2        | solute carrier family 35 (UDP-GlcNAc/UDP-glucose transporter), member D2 [Source:ZFIN;Acc:ZDB-GENE-080125-1] | -1.541002145 | 0.527310329  | 4.2232102   | 2.155382717  |
| ENSORLG000000012406 | -              | -                                                                                                            | 0            | 13.71371837  | 15.61639808 | 1.903152842  |
| ENSORLG000000021531 | RF00089        | small nucleolar RNA SNORD31 [Source:NCBI gene:Acc:11946359]                                                  | -13.78312921 | 2.712440177  | 16.40599203 | -0.089087474 |
| ENSORLG000000013031 | -              | -                                                                                                            | -3.858668406 | -0.053805004 | 6.003865365 | 2.199491341  |
| ENSORLG000000008087 | brd9           | bromodomain containing 9 [Source:ZFIN;Acc:ZDB-GENE-060502-1]                                                 | -1.82440241  | 0.157685395  | 3.855593564 | 1.873453007  |
| ENSORLG000000069888 | -              | -                                                                                                            | -3.540274693 | 0.993817563  | 4.261471502 | -0.272134342 |
| ENSORLG00000008049  | casp3a         | caspace 3B [Source:NCBI gene:Acc:100049265]                                                                  | -1.573446205 | 0.816564769  | 3.085356541 | 0.695353045  |
| ENSORLG00000004016  | -              | -                                                                                                            | -9.73485882  | 5.44370707   | 17.11039978 | 1.933303075  |
| ENSORLG000000010111 | plod2          | procollagen-lysine, 2-oxoglutarate 5-dioxygenase 2 [Source:ZFIN;Acc:ZDB-GENE-070326-1]                       | -0.714223597 | 2.923851162  | 3.002590543 | -0.635000766 |
| ENSORLG000000001671 | kcd1           | KCD motif containing 1 [Source:NCBI gene:Acc:101163467]                                                      | -3.509159107 | 0.460656443  | 4.299631773 | 0.330300973  |
| ENSORLG000000011097 | supt4h1        | SPT4 homolog, DSIF elongation factor subunit [Source:NCBI gene:Acc:101165335]                                | -5.089388494 | 0.450240917  | 7.347587214 | 1.808442628  |
| ENSORLG000000007575 | bxn            | threosulfonamide [Source:NCBI gene:Acc:101173415]                                                            | -2.794915904 | 1.178432581  | 5.263849121 | 0.713820861  |
| ENSORLG00000006183  | -              | -                                                                                                            | 0.304727292  | 1.507311219  | 3.886447664 | 2.684047684  |
| ENSORLG000000012507 | carntm1        | carnosine N-methyltransferase 1 [Source:NCBI gene:Acc:101159445]                                             | -4.560403638 | 0.768351476  | 3.942107494 | -1.386163421 |
| ENSORLG000000013156 | -              | -                                                                                                            | -6.203693825 | 0.284532828  | 3.52407759  | -2.963662365 |
| ENSORLG000000015666 | rheb1          | GTP-binding protein Rheb [Source:NCBI gene:Acc:101166653]                                                    | -0.956076286 | 0.911735977  | 3.1291136   | 1.261786304  |
| ENSORLG000000013684 | zgc-92287      | zgc-92287 [Source:ZFIN;Acc:ZDB-GENE-040718-350]                                                              | -7.823155989 | 0.811493647  | 4.699039797 | -3.935070769 |
| ENSORLG000000007422 | -              | -                                                                                                            | -3.168750043 | -0.748545545 | 3.240618288 | 0.820893144  |
| ENSORLG000000009608 | -              | -                                                                                                            | -1.820389779 | 1.268683026  | 3.636707589 | 0.558589791  |
| ENSORLG000000009989 | -              | -                                                                                                            | -0.33462297  | 2.574675049  | 4.11951121  | 1.810688222  |
| ENSORLG000000080222 | -              | -                                                                                                            | -6.167208437 | 1.148819143  | 6.669181416 | -0.646356035 |
| ENSORLG00000008042  | -              | -                                                                                                            | -2.940826036 | -0.271120717 | 3.007160918 | 0.338545421  |
| ENSORLG00000004793  | -              | -                                                                                                            | -3.002115442 | 0.109692624  | 4.271769317 | 1.186268065  |
| ENSORLG00000007057  | nsa10          | N(alpha)-acetyltransferase 10, NAta catalytic subunit [Source:NCBI gene:Acc:101165304]                       | -1.830488013 | 0.454048724  | 3.539776975 | 1.255725234  |
| ENSORLG000000009535 | -              | -                                                                                                            | -7.588637543 | 0.684817012  | 4.545603978 | -3.727370268 |
| ENSORLG000000003718 | tusc2a         | tumor suppressor 2, mitochondrial calcium regulator [Source:NCBI gene:Acc:101169352]                         | -3.584942537 | -0.535509032 | 4.066739636 | 1.011791611  |
| ENSORLG000000015096 | -              | -                                                                                                            | -2.915515358 | 0.635813311  | 4.398813025 | 0.847907401  |
| ENSORLG000000009179 | fucm           | fucose mutarotase [Source:NCBI gene:Acc:101170455]                                                           | -18.57850375 | -0.607762923 | 17.91127869 | 1.941028022  |
| ENSORLG000000006166 | elp5           | elongator acetyltransferase complex subunit 5 [Source:ZFIN;Acc:ZDB-GENE-061215-33]                           | -4.662021904 | 0.253598502  | 4.622404292 | -0.292731319 |
| ENSORLG000000003200 | atpaf2         | ATP synthase mitochondrial F1 complex assembly factor 2 [Source:NCBI gene:Acc:101173178]                     | -3.059820767 | 0.461675223  | 3.69629266  | 0.175281668  |
| ENSORLG000000006638 | pgfs           | 6-phosphogluconolactonase [Source:NCBI gene:Acc:101169968]                                                   | -1.648804237 | 0.613858148  | 4.24083161  | 1.978653801  |
| ENSORLG000000006912 | ap2s1          | adaptor-related protein complex 2, sigma 1 subunit [Source:ZFIN;Acc:ZDB-GENE-040426-2174]                    | -3.848475918 | 1.293853013  | 6.135862082 | 0.994017851  |

|                     |                |                                                                                                          |              |              |             |              |
|---------------------|----------------|----------------------------------------------------------------------------------------------------------|--------------|--------------|-------------|--------------|
| ENSRORG0000011191   | hirp3          | HIRA interacting protein 3 [Source:ZFIN;Acc:ZDB-GENE-030131-5753]                                        | -4.539177179 | 0.539036011  | 5.170444298 | 0.09271541   |
| ENSRORG0000011413   | vps25          | vesicular protein sorting 25 homolog (S. cerevisiae) [Source:ZFIN;Acc:ZDB-GENE-050506-30]                | -1.625246529 | 0.348416748  | 3.167335966 | 1.194157528  |
| ENSRORG0000000887   | trnsf2         | transmembrane 6 superfamily member 2 [Source:ZFIN;Acc:ZDB-GENE-060503-338]                               | -0.536071716 | 4.348806184  | 6.637641801 | 1.7523254738 |
| ENSRORG00000015648  | arfgap1        | ADP-ribosylation factor GTPase activating protein 1 [Source:ZFIN;Acc:ZDB-GENE-041114-130]                | -3.142125568 | 0.89863613   | 4.983848234 | 0.952317553  |
| ENSRORG00000003354  | zsmtd5         | proteasome 26S subunit, non-ATPase 5 [Source:ZFIN;Acc:ZDB-GENE-050417-28]                                | -3.921236809 | 0.9735476    | 3.96876611  | -0.925531935 |
| ENSRORG00000005294  | zsmtd5         | proteasome 26S subunit, non-ATPase 5 [Source:ZFIN;Acc:ZDB-GENE-050417-28]                                | -1.300154822 | 0.668536528  | 3.092170803 | 1.123964389  |
| ENSRORG0000001332   | si:dkv-147f3   | si:dkv-147f3 [Source:ZFIN;Acc:ZDB-GENE-061009-081009]                                                    | -3.254135271 | 0.657387689  | 4.136963748 | 0.220480603  |
| ENSRORG00000013772  | si:dkv-147f3   | si:dkv-147f3 [Source:ZFIN;Acc:ZDB-GENE-061009-081009]                                                    | -3.470286951 | 1.415449751  | 5.498164639 | 0.35391095   |
| ENSRORG00000007424  | thg1l1         | tRNA-histidine guanylyltransferase 1-like [Source:ZFIN;Acc:ZDB-GENE-041114-170]                          | -3.731345236 | 0.499000394  | 3.739887886 | -0.499927824 |
| ENSRORG00000007890  | -              | -                                                                                                        | -2.610167775 | -            | 0.92788378  | 3.188102338  |
| ENSRORG00000004465  | zsmc3p         | PSMC3 interacting protein [Source:ZFIN;Acc:ZDB-GENE-040625-125]                                          | -1.293760615 | 0.722603492  | 4.089695498 | 2.072816284  |
| ENSRORG0000010604   | ofdnf6         | orfoclin subunit 6 [Source:NCBI;gene:Acc:101164323]                                                      | -1.824248561 | 1.397115018  | 3.851855301 | 0.630979002  |
| ENSRORG0000015117   | odegpl1        | O-sialoglycoprotein endopeptidase-like 1 [Source:ZFIN;Acc:ZDB-GENE-030616-532]                           | -2.889794924 | 0.526372569  | 3.163257473 | -0.252424963 |
| ENSRORG0000001338   | zgc:103892     | zgc:103892 [Source:ZFIN;Acc:ZDB-GENE-041010-151]                                                         | -3.911043664 | 1.102416154  | 5.371324593 | 0.358349709  |
| ENSRORG00000017350  | -              | -                                                                                                        | -2.699199384 | 0.040796332  | 3.964936382 | 1.31542533   |
| ENSRORG00000008661  | rik2           | RIK kinase 2 (yeast) [Source:ZFIN;Acc:ZDB-GENE-040426-2913]                                              | -2.311400517 | -0.09387115  | 3.197002899 | 0.979958486  |
| ENSRORG00000009431  | nmnd1          | meiotic nuclear divisions 1 homolog (S. cerevisiae) [Source:ZFIN;Acc:ZDB-GENE-040801-116]                | -1.855631355 | -0.017660508 | 4.054650159 | 2.217164173  |
| ENSRORG00000017529  | rsrp1          | arginine and serine rich protein 1 [Source:NCBI;gene:Acc:101160860]                                      | -2.016529964 | -0.028350562 | 3.235608078 | 1.247913618  |
| ENSRORG00000002741  | -              | -                                                                                                        | -1.928367595 | 1.045628495  | 3.042870958 | 0.069359643  |
| ENSRORG00000010115  | rab23          | RAB23, member RAS oncogene family [Source:NCBI;gene:Acc:1011555630]                                      | 0.261994434  | 0.560900718  | 3.026866602 | 2.728445078  |
| ENSRORG00000007723  | tsr3           | TSK3, tskp transferase ribosome maturation factor [Source:NCBI;gene:Acc:101166503]                       | -3.906482057 | 1.887357303  | 4.191627303 | -1.601727362 |
| ENSRORG00000008321  | -              | -                                                                                                        | -3.142315641 | 2.034647643  | 4.719778865 | -0.456699338 |
| ENSRORG00000001864  | -              | -                                                                                                        | -6.543958181 | 0.494851947  | 7.396282444 | 0.357962378  |
| ENSRORG00000013648  | magoh          | protein mago nashi homolog [Source:NCBI;gene:Acc:101167611]                                              | -2.547214836 | 0.946961512  | 4.428092747 | 0.93440126   |
| ENSRORG00000004553  | chordc1b       | cysteine and histidine-rich domain (CHORD) containing 1b [Source:ZFIN;Acc:ZDB-GENE-040416-1288]          | -3.391809747 | 0.322764658  | 5.361937338 | 1.647848113  |
| ENSRORG00000000982  | apip           | APAF1 interacting protein [Source:NCBI;gene:Acc:101160223]                                               | -2.245377647 | 0.13074817   | 3.300528192 | 0.924887258  |
| ENSRORG00000008290  | cutc           | cutc copper transporter [Source:NCBI;gene:Acc:101163753]                                                 | -1.499990402 | 0.446825926  | 4.089992433 | 2.143660927  |
| ENSRORG00000007724  | -              | -                                                                                                        | -3.391816322 | -0.359475041 | 5.12008328  | 2.088227255  |
| ENSRORG00000015258  | zgc:56699      | gametocyte-specific factor 1 [Source:NCBI;gene:Acc:101173193]                                            | -5.279353882 | 0.728933656  | 5.757707676 | -0.250094941 |
| ENSRORG00000014486  | -              | -                                                                                                        | -3.207384895 | -0.697119764 | 3.763554511 | 1.253774631  |
| ENSRORG00000016544  | lam131a        | family with sequence similarity 131, member A [Source:ZFIN;Acc:ZDB-GENE-080204-112]                      | -5.807866588 | -0.173035322 | 3.688779281 | -1.945657552 |
| ENSRORG00000001004  | ndufa1         | NDUFA1, NADH dehydrogenase complex subunit 1 [Source:ZFIN;Acc:ZDB-GENE-040625-040625]                    | -1.449903785 | 0.684999607  | 3.780516719 | 1.646098179  |
| ENSRORG00000014337  | LGALS2         | galactose 2 [Source:HGNC;Symbol:Acc:HGNC:6582]                                                           | -15.83745382 | 1.684078766  | 16.4681002  | -1.194168871 |
| ENSRORG00000007711  | DPY19L4        | dpv-19 like 4 [Source:HGNC;Symbol:Acc:HGNC:27829]                                                        | -0.70023376  | 0.4318484    | 3.49971325  | 2.358320217  |
| ENSRORG00000007862  | trmt10b        | tRNA methyltransferase 10B [Source:ZFIN;Acc:ZDB-GENE-061013-313]                                         | -2.281332464 | 1.054905761  | 3.110894388 | -0.224858685 |
| ENSRORG00000015882  | si:ch211-1650  | si:ch211-1650 [Source:ZFIN;Acc:ZDB-GENE-131121-61]                                                       | -1.574115913 | -0.310340621 | 3.086850236 | 1.823560224  |
| ENSRORG00000000871  | plra4a         | glycine receptor, alpha 4a [Source:ZFIN;Acc:ZDB-GENE-010410-3]                                           | 1.157390098  | 1.665573183  | 3.246160504 | 2.73846379   |
| ENSRORG00000008002  | -              | -                                                                                                        | -1.728401126 | 1.066451508  | 4.867712314 | 2.07534273   |
| ENSRORG00000010263  | swi5           | SWI5 homologous recombination repair protein [Source:NCBI;gene:Acc:101158369]                            | -4.470470059 | 2.252596799  | 5.584512899 | -1.138068619 |
| ENSRORG000000010780 | si:zfos-169g1d | protein CutA homolog [Source:NCBI;gene:Acc:101174485]                                                    | -2.191584317 | 1.245982815  | 5.246334451 | 1.809251982  |
| ENSRORG00000016092  | pfufut2        | protein O-fucosyltransferase 2 [Source:ZFIN;Acc:ZDB-GENE-030131-3595]                                    | -0.874332737 | -0.088445222 | 3.035667388 | 2.250164913  |
| ENSRORG00000009672  | si:zfos-911b5  | si:zfos-911b5 [Source:ZFIN;Acc:ZDB-GENE-130603-130603]                                                   | -1.829463248 | 0.704073168  | 3.003380742 | 0.467329064  |
| ENSRORG00000013562  | -              | -                                                                                                        | -2.649471733 | -0.321111949 | 3.836319063 | 1.508413904  |
| ENSRORG00000009124  | semp5          | SUMO specific peptidase 5 [Source:ZFIN;Acc:ZDB-GENE-050208-772]                                          | -1.992694347 | 0.683117624  | 3.37828507  | 0.702957826  |
| ENSRORG00000008457  | sgk3           | serum/glucocorticoid regulated kinase family, member 3 [Source:ZFIN;Acc:ZDB-GENE-070424-49]              | 0.38014554   | 1.965434783  | 4.082044774 | 2.497240611  |
| ENSRORG00000007850  | -              | -                                                                                                        | -15.0470634  | 1.801582407  | 15.81331023 | -1.134845527 |
| ENSRORG00000009884  | cznh           | cyclin H [Source:NCBI;gene:Acc:101159751]                                                                | -2.778912201 | 1.08096235   | 3.452874501 | -0.406515011 |
| ENSRORG00000009928  | nmmp1          | inner mitochondrial membrane peptidase subunit 1 [Source:ZFIN;Acc:ZDB-GENE-070522-4]                     | -2.99544814  | 0.661749489  | 4.78316338  | 1.126393452  |
| ENSRORG00000004362  | mis18a         | MIS18 kinetochore protein A [Source:NCBI;gene:Acc:10110115]                                              | -1.295483368 | 0.282301769  | 4.424758927 | 2.6702889    |
| ENSRORG00000002032  | fbpa           | fibroblast growth factor (acidic) intracellular binding protein a [Source:ZFIN;Acc:ZDB-GENE-040426-1363] | -1.544965109 | 0.69983602   | 3.297065907 | 1.052702213  |
| ENSRORG00000014778  | -              | -                                                                                                        | -0.763111889 | 1.215610491  | 3.597942354 | 1.619704886  |
| ENSRORG00000004354  | HAUS1          | HAUS augmin like complex subunit 1 [Source:NCBI;gene:Acc:101168876]                                      | -3.89919474  | 0.51270437   | 4.88430777  | 0.472893515  |
| ENSRORG00000007932  | trn2           | reticulocalbin 2 [Source:ZFIN;Acc:ZDB-GENE-050706-050706]                                                | -6.15271044  | 0.24684493   | 5.682582825 | -0.716487649 |
| ENSRORG00000009765  | bczp           | BRC2 and CDKN1A interacting protein [Source:NCBI;gene:Acc:101165354]                                     | -3.062515696 | 0.334576723  | 4.414084693 | 1.017477397  |
| ENSRORG00000003851  | -              | -                                                                                                        | -5.02829826  | 0.753413936  | 5.495717446 | -0.285508858 |
| ENSRORG00000002724  | ctd45          | CDC45 cell division cycle 45 homolog (S. cerevisiae) [Source:ZFIN;Acc:ZDB-GENE-040426-2710]              | -2.779765221 | -0.409529155 | 3.334118975 | 0.964367749  |
| ENSRORG00000013879  | yeats4         | YEATS domain containing 4 [Source:NCBI;gene:Acc:101163215]                                               | -4.670549279 | 1.559138018  | 5.068701047 | -1.142500974 |
| ENSRORG00000010467  | si:ch211-284b  | chromosome 17 Clorf123 homolog [Source:NCBI;gene:Acc:101155068]                                          | -1.421422674 | 0.670646386  | 3.08945304  | 0.997869077  |
| ENSRORG00000004351  | gp:slp1        | GRAP1 motifs containing 1 [Source:ZFIN;Acc:ZDB-GENE-040801-212]                                          | 1.27786641   | 2.512784456  | 3.604173853 | 2.36974078   |
| ENSRORG00000009826  | -              | -                                                                                                        | -1.73241617  | 0.963719811  | 3.957988244 | 1.272851875  |
| ENSRORG00000006305  | -              | -                                                                                                        | 0.68929152   | 2.38407399   | 3.543649413 | 1.84895402   |
| ENSRORG00000010271  | lctn8b         | potassium channel tetramerization domain containing 6 [Source:NCBI;gene:Acc:101166793]                   | -2.162039043 | 0.28891062   | 3.487485333 | 1.037120717  |
| ENSRORG00000008828  | DDA1           | DDA1 and DDB1 associated 1 [Source:NCBI;gene:Acc:101171286]                                              | -2.746647713 | 0.809118895  | 4.202852471 | 0.647570722  |
| ENSRORG00000009402  | poc5           | POC5 centriolar protein homolog (Chlamydomonas) [Source:ZFIN;Acc:ZDB-GENE-060926-135]                    | -3.043193217 | -0.162596546 | 3.633841673 | 0.753729927  |
| ENSRORG00000015185  | tango2         | transport and gapa organization 2 homolog [Source:NCBI;gene:Acc:101156177]                               | -3.544662166 | 0.907276645  | 4.969453076 | 0.517999101  |
| ENSRORG00000008700  | kif5a          | kinesin family member 3A [Source:ZFIN;Acc:ZDB-GENE-050417-71]                                            | -0.68968781  | -0.030050837 | 3.566535163 | 2.907858544  |
| ENSRORG00000014309  | ipa2           | rediplication protein A2 [Source:NCBI;gene:Acc:101166793]                                                | -1.45930368  | 0.308469819  | 3.458429903 | 1.691141456  |
| ENSRORG00000016483  | -              | -                                                                                                        | -2.032873629 | -0.627413836 | 3.047024618 | 1.642059796  |
| ENSRORG00000017156  | -              | -                                                                                                        | -8.86549694  | 5.81354937   | 15.8745469  | 1.158597463  |
| ENSRORG00000004679  | -              | -                                                                                                        | -1.706428613 | 1.682618316  | 3.838011959 | 0.448511676  |
| ENSRORG00000012642  | lsm1           | LSM1 homolog, mRNA degradation associated [Source:NCBI;gene:Acc:101156502]                               | -8.854368753 | 1.005387662  | 5.297553475 | -4.561717824 |

|                    |               |                                                                                                                               |              |              |             |              |
|--------------------|---------------|-------------------------------------------------------------------------------------------------------------------------------|--------------|--------------|-------------|--------------|
| ENSRGLG0000009440  | pdrg1         | p53 and DNA-damage regulated 1<br>[Source:ZFIN;Acc:ZDB-GENE-050417-276]                                                       | -3.622963006 | 1.337712167  | 4.996581425 | 0.036391326  |
| ENSRGLG0000005610  | chst15        | carboxylate (N-acetyl)glucosamine 4-sulfate 6-O-sulfotransferase 15 [Source:ZFIN;Acc:ZDB-GENE-131127-327]                     | -0.256271973 | 2.755527025  | 4.618465489 | 1.607152571  |
| ENSRGLG0000006438  | lin37         | lin-37 DREAM-MuvB core complex component [Source:ZFIN;Acc:ZDB-GENE-050417-446]                                                | -0.180759979 | 0.503123245  | 3.307445544 | 2.624047291  |
| ENSRGLG0000009577  | cenpn         | centromere protein N [Source:ZFIN;Acc:ZDB-GENE-030616-408]                                                                    | -3.135671935 | 0.728496861  | 3.765661316 | -0.098124321 |
| ENSRGLG0000007573  | zgc:112148    | Gold-1 apparatus membrane protein TP23 homolog B [Source:NCBI gene:Acc:101169291]                                             | -1.702391652 | 1.003262687  | 4.557165174 | 1.851995578  |
| ENSRGLG0000005380  | zgc:165532    | zgc:165532 [Source:ZFIN;Acc:ZDB-GENE-050417-213]                                                                              | -1.993978416 | 1.430391763  | 4.636606035 | 1.212720637  |
| ENSRGLG00000012834 | gmn           | geminin, DNA replication inhibitor [Source:ZFIN;Acc:ZDB-GENE-030429-30]                                                       | -3.151862289 | 1.260544731  | 3.59310441  | -0.818817546 |
| ENSRGLG0000006192  | -             | glutathione S-transferase omega-1 [Source:NCBI gene:Acc:101171103]                                                            | -3.66158352  | 1.529315321  | 7.254204038 | 2.063790421  |
| ENSRGLG0000001118  | mctsl         | MCTSL, re-initiation and release factor [Source:NCBI gene:Acc:101161648]                                                      | -6.218389631 | 2.238739898  | 7.687541888 | -0.769156762 |
| ENSRGLG0000001018  | -             | -                                                                                                                             | -0.309996621 | 2.0084688    | 6.674815899 | 1.314454217  |
| ENSRGLG0000005300  | -             | -                                                                                                                             | -5.25535499  | -2.209068204 | 3.215887159 | -0.300115382 |
| ENSRGLG0000009642  | -             | -                                                                                                                             | 1.18146338   | 2.679217222  | 4.131689854 | 2.734424049  |
| ENSRGLG0000003303  | sent9b        | sentin 9b [Source:ZFIN;Acc:ZDB-GENE-050327-17]                                                                                | -0.412724985 | 0.264037018  | 3.147352613 | 2.471074519  |
| ENSRGLG0000002932  | saln3         | SALR antitoxin binding domain containing 3 [Source:ZFIN;Acc:ZDB-GENE-061103-415]                                              | -2.57592458  | 1.006473252  | 3.997489042 | 0.415907892  |
| ENSRGLG00000021510 | Rf00322       | small nucleolar RNA SNORA31 [Source:NCBI gene:Acc:11947250]                                                                   | -3.405478756 | 2.60043889   | 7.314498641 | 1.309070345  |
| ENSRGLG00000015671 | -             | dyxactin subunit 3 [Source:NCBI gene:Acc:101164183]                                                                           | -0.868269045 | 0.97235344   | 3.200760756 | 1.36062308   |
| ENSRGLG00000013026 | slc25a17      | solute carrier family 25 (mitochondrial carrier; peroxisomal membrane protein), member 17 [Source:ZFIN;Acc:ZDB-GENE-070620-4] | -1.771554885 | 0.840085764  | 3.47301788  | 0.861862103  |
| ENSRGLG00000013278 | snrpd2        | small nuclear ribonucleoprotein D2 polypeptide [Source:NCBI gene:Acc:101158296]                                               | -2.11870364  | 1.885802504  | 3.968432522 | -0.035588817 |
| ENSRGLG00000011936 | -             | -                                                                                                                             | 0.015797766  | 2.037550045  | 3.291544071 | 1.27027478   |
| ENSRGLG00000009782 | gdb8a         | glucose-induced degradation protein 8 homolog [Source:NCBI gene:Acc:101165057]                                                | -3.35283375  | 0.399360818  | 4.816833099 | 1.065123771  |
| ENSRGLG00000007571 | -             | -                                                                                                                             | -4.460205864 | 0.474881878  | 5.446120612 | 0.511518142  |
| ENSRGLG00000006150 | thtpa         | thiamine triphosphatase [Source:ZFIN;Acc:ZDB-GENE-070502-2]                                                                   | -2.022865986 | 0.712552196  | 3.307056365 | 0.57210259   |
| ENSRGLG0000007565  | WASHC2C       | WASH complex subunit 2C [Source:HGNC Symbol;Acc:HGNC:23414]                                                                   | -1.366083162 | 0.085243667  | 3.125079868 | 1.674237788  |
| ENSRGLG0000003464  | lam206a       | family with sequence similarity 206 member A [Source:NCBI gene:Acc:101176501]                                                 | -5.351184457 | 0.66830423   | 4.18201464  | -1.836988739 |
| ENSRGLG00000008096 | sam1          | sterile alpha and TIR motif containing 1 [Source:ZFIN;Acc:ZDB-GENE-040719-1]                                                  | -1.655598808 | -0.540119946 | 3.543257007 | 2.428265253  |
| ENSRGLG00000015806 | zgc:101564    | family with sequence similarity 72 member A [Source:NCBI gene:Acc:101185016]                                                  | -0.450103265 | 0.658943631  | 3.547038891 | 2.438447832  |
| ENSRGLG00000008916 | capza1b       | F-actin-capping protein subunit alpha-1 [Source:NCBI gene:Acc:101159261]                                                      | -2.246926619 | 0.787331463  | 4.002955329 | 0.969182522  |
| ENSRGLG0000004759  | -             | -                                                                                                                             | -0.358114672 | 2.209158112  | 4.698437116 | 2.131851089  |
| ENSRGLG00000055229 | -             | -                                                                                                                             | -4.422765183 | 0.352656186  | 3.838023692 | -0.936912587 |
| ENSRGLG0000001070  | zgc:56596     | ubiquitin like 4A [Source:NCBI gene:Acc:101168961]                                                                            | -2.262844441 | 1.123070753  | 3.220115512 | -0.162754761 |
| ENSRGLG00000016534 | -             | -                                                                                                                             | 0.14252945   | 0.96641747   | 2.08641174  | -0.059311754 |
| ENSRGLG00000011318 | -             | -                                                                                                                             | -1.591036294 | 0.050058684  | 3.687425248 | 2.048814215  |
| ENSRGLG00000009914 | -             | -                                                                                                                             | -3.359277246 | 1.93699342   | 4.560005138 | -0.735776131 |
| ENSRGLG00000014702 | utp11l        | UTP11, small subunit processome component [Source:NCBI gene:Acc:101174775]                                                    | -6.293357296 | 2.245595038  | 6.296004755 | -2.242467707 |
| ENSRGLG00000021774 | ND4L          | NADH dehydrogenase subunit 4L [Source:NCBI gene:Acc:805424]                                                                   | -10.90899308 | 1.179089371  | 13.61277465 | 1.525245107  |
| ENSRGLG00000009887 | zgc:153240.1  | zgc:153240 [Source:ZFIN;Acc:ZDB-GENE-060825-218]                                                                              | -2.047460065 | 0.126590699  | 3.027527572 | 0.853961968  |
| ENSRGLG0000002638  | dut           | deoxyuridine triphosphatase [Source:NCBI gene:Acc:101171897]                                                                  | -0.846442551 | 0.236113997  | 3.57029478  | 2.492957911  |
| ENSRGLG00000004735 | -             | -                                                                                                                             | -1.361292615 | 0.965766247  | 3.310032663 | 0.983458478  |
| ENSRGLG00000015214 | nemp1         | nuclear envelope integral membrane protein 1 [Source:ZFIN;Acc:ZDB-GENE-090313-182]                                            | -1.989534404 | 0.449657719  | 3.438717466 | 1.000010553  |
| ENSRGLG00000013756 | -             | cell division control protein 42 homolog [Source:NCBI gene:Acc:101164400]                                                     | -2.476864585 | 0.535688171  | 3.240320155 | 0.22825214   |
| ENSRGLG00000003947 | aaed1         | AhpC75A antioxidant enzyme domain containing 1 [Source:NCBI gene:Acc:101163271]                                               | -0.821750391 | 2.057405816  | 3.425608434 | 0.546938085  |
| ENSRGLG00000003792 | -             | vesicle transport protein GOT1B [Source:NCBI gene:Acc:101162835]                                                              | -0.854670843 | 1.42586282   | 3.99774311  | 1.617694598  |
| ENSRGLG00000005936 | kif18a        | kinesin family member 18A [Source:ZFIN;Acc:ZDB-GENE-040426-882]                                                               | -2.039629202 | -0.455924144 | 3.195291578 | 1.612071306  |
| ENSRGLG00000007765 | sat2b         | damine acetyltransferase 2 [Source:NCBI gene:Acc:101174286]                                                                   | -3.296000119 | -0.424552389 | 4.231018517 | 1.36005591   |
| ENSRGLG00000001167 | -             | -                                                                                                                             | 1.888908178  | 6.280508182  | 6.223398865 | 1.832299306  |
| ENSRGLG00000007273 | ankrd13a      | ankyrin repeat domain 13A [Source:ZFIN;Acc:ZDB-GENE-030131-1833]                                                              | -0.947277471 | 0.080171249  | 3.37782482  | 2.350818726  |
| ENSRGLG00000002158 | map2k5        | mitogen-activated protein kinase kinase 5 [Source:ZFIN;Acc:ZDB-GENE-030131-1517]                                              | -3.671367975 | 0.816420603  | 5.373646548 | 0.886341555  |
| ENSRGLG00000011537 | -             | -                                                                                                                             | -2.296281225 | 0.920685643  | 4.384100244 | 1.167618044  |
| ENSRGLG00000003452 | ran           | RAN, member RAS oncogene family [Source:NCBI gene:Acc:101156259]                                                              | -2.488021555 | 0.666569106  | 4.62297799  | 1.468872102  |
| ENSRGLG00000011527 | zgc:162816    | zgc:162816 [Source:ZFIN;Acc:ZDB-GENE-070410-94]                                                                               | -3.471214014 | -0.035576632 | 3.202079273 | -0.233074231 |
| ENSRGLG00000013087 | rs25          | ribosomal protein S25 [Source:ZFIN;Acc:ZDB-GENE-040426-1788]                                                                  | -1.361767151 | 1.632098909  | 4.491328768 | 1.497947666  |
| ENSRGLG00000014721 | -             | chromosome 9 C12orf43 homolog [Source:NCBI gene:Acc:101165894]                                                                | -5.031956492 | -0.549912421 | 4.035147449 | -0.446417271 |
| ENSRGLG00000013387 | -             | -                                                                                                                             | -3.31084564  | -0.841485954 | 4.419335579 | 1.750481063  |
| ENSRGLG00000002761 | chby1         | chubby homolog 1 (Drosophila) [Source:ZFIN;Acc:ZDB-GENE-030131-5074]                                                          | -2.961352631 | 1.915610942  | 6.403837262 | 1.52735823   |
| ENSRGLG0000001619  | bbs4          | Bardet-Biedl syndrome 4 [Source:ZFIN;Acc:ZDB-GENE-060126-2]                                                                   | -1.786208301 | -0.447336346 | 3.616546801 | 2.278159746  |
| ENSRGLG00000001290 | -             | -                                                                                                                             | -0.804279223 | -0.183787611 | 3.001990934 | 2.381984115  |
| ENSRGLG00000004778 | POC1A         | POC1 centriolar protein A [Source:HGNC Symbol;Acc:HGNC:24488]                                                                 | -1.129317577 | 0.758411864  | 4.305426918 | 2.418182303  |
| ENSRGLG00000011006 | ltnm48        | RNA binding motif protein 48 [Source:NCBI gene:Acc:101175089]                                                                 | -4.062007955 | -0.243920876 | 4.904294012 | 1.086692565  |
| ENSRGLG00000010275 | snim4         | small integral membrane protein 4 [Source:ZFIN;Acc:ZDB-GENE-170130-1]                                                         | -1.937356602 | 1.32814974   | 3.778663209 | 0.513641639  |
| ENSRGLG00000011894 | -             | -                                                                                                                             | -1.71384152  | 0.46413046   | 3.76055314  | 1.584891183  |
| ENSRGLG00000009595 | -             | -                                                                                                                             | -3.332814442 | 2.73539545   | 6.971758446 | 1.323474294  |
| ENSRGLG00000007301 | pin4          | peptidylprolyl cis/trans isomerase, NIMA-interacting 4 [Source:NCBI gene:Acc:101160079]                                       | -2.277939809 | 0.435501284  | 4.691301165 | 1.978345122  |
| ENSRGLG00000011885 | hahd2         | halobactin dehalogenase like hydrolase domain containing 2 [Source:NCBI gene:Acc:101168225]                                   | -2.987644828 | -0.289948708 | 3.435849278 | 0.738638031  |
| ENSRGLG00000011898 | -             | -                                                                                                                             | -3.14782742  | 1.217332691  | 3.74341172  | -0.590334086 |
| ENSRGLG00000011113 | -             | -                                                                                                                             | 0.12306835   | 2.312193738  | 4.286246713 | 1.807381123  |
| ENSRGLG00000002592 | -             | Golgi SNAP receptor complex member 1 [Source:NCBI gene:Acc:101157798]                                                         | -8.081337151 | 1.31166072   | 9.097291527 | -0.295221226 |
| ENSRGLG00000011389 | HENMT1        | HERN methyltransferase 1 [Source:NCBI gene:Acc:101168973]                                                                     | -2.101804469 | -0.297534688 | 3.150918209 | 1.347133669  |
| ENSRGLG00000004675 | -             | -                                                                                                                             | -6.309527862 | 1.371902308  | 7.322873781 | -0.358070985 |
| ENSRGLG00000002580 | si:ch211-5119 | chromosome 9 C22orf89 homolog [Source:NCBI gene:Acc:101172621]                                                                | -4.057638405 | 1.690234143  | 4.91926164  | -0.8281265   |
| ENSRGLG00000005191 | TENT4A        | terminal nucleotidyltransferase 4A [Source:HGNC Symbol;Acc:HGNC:16705]                                                        | -2.868266254 | 0.552264674  | 3.807826377 | 0.3877801    |

|            |     |                    |                                                                                                                                   |              |              |              |              |
|------------|-----|--------------------|-----------------------------------------------------------------------------------------------------------------------------------|--------------|--------------|--------------|--------------|
|            |     | ENSRGLG00000006911 | iron-sulfur cluster assembly enzyme [Source:NCBI gene:Acc:101165644]                                                              | -4.29586826  | 1.791634288  | 5.749462301  | -0.337573987 |
|            |     | ENSRGLG00000007738 | mediator complex subunit 7 [Source:ZFIN:Acc:ZDB-GENE-030131-4823]                                                                 | -2.310335775 | 0.862391836  | 3.195055848  | 0.022813002  |
|            |     | ENSRGLG00000006196 | GABA(A) receptor-associated protein 4 [Source:ZFIN:Acc:ZDB-GENE-030131-5174]                                                      | -2.364164229 | 2.277057638  | 4.845454185  | 0.204804976  |
|            |     | ENSRGLG00000007400 | pleckstrin homology domain containing, family A (phosphoinositide binding specific) member 8 [Source:ZFIN:Acc:ZDB-GENE-041114-69] | -1.366054216 | 0.662827951  | 3.863004919  | 1.834607714  |
|            |     | ENSRGLG00000009118 | DNMT1 demethylase domain transferase 1 homolog [Source:NCBI gene:Acc:101156415]                                                   | -3.435980431 | 0.04470067   | 3.099351042  | -0.380845313 |
|            |     | ENSRGLG00000006393 | spermine synthase [Source:ZFIN:Acc:ZDB-GENE-040626-150]                                                                           | -1.782020485 | 0.587911657  | 3.370779092  | 1.001331723  |
|            |     | ENSRGLG00000008500 | cd8b [Source:ZFIN:Acc:ZDB-GENE-091204-31]                                                                                         | -0.021481172 | 2.32918583   | 3.042944027  | 0.692762891  |
|            |     | ENSRGLG00000015097 | ORMDL1 sphingolipid biosynthesis regulator 1 [Source:NCBI gene:Acc:101165518]                                                     | -3.169345342 | 2.672560223  | 6.772123603  | 0.930702138  |
|            |     | ENSRGLG00000006183 | RSH domain containing 4 [Source:ZFIN:Acc:ZDB-GENE-070112-1321]                                                                    | 0.431198199  | 0.645465084  | 3.048386357  | 2.834584336  |
|            |     | ENSRGLG00000009674 | glutathione S-transferase alpha 4 [Source:NCBI gene:Acc:101174370]                                                                | -1.729085155 | 0.190918682  | 3.264822831  | 1.345304079  |
|            |     | ENSRGLG00000016567 | uncharacterized LOC101171452 [Source:NCBI gene:Acc:101168963]                                                                     | -4.251554751 | 1.471468971  | 3.95017021   | -1.772369141 |
|            |     | ENSRGLG00000006863 | zwilch histidine protein [Source:ZFIN:Acc:ZDB-GENE-050420-101]                                                                    | -0.052517396 | 0.374715112  | 3.204762085  | 2.778014477  |
|            |     | ENSRGLG00000011756 | calcium and integrin binding 1 [Source:NCBI gene:Acc:101168963]                                                                   | -1.393423421 | 2.063433711  | 6.157268615  | 2.700896404  |
|            |     | ENSRGLG00000009140 | mitochondrial ribosome-associated GTPase 1 [Source:ZFIN:Acc:ZDB-GENE-031110-2]                                                    | -3.403467888 | 0.141661922  | 3.112714905  | -0.431930105 |
|            |     | ENSRGLG00000008200 | gqsr1 [Source:ZFIN:Acc:ZDB-GENE-050417-133]                                                                                       | -4.741927918 | -0.290168319 | 4.412188043  | -0.039086557 |
|            |     | ENSRGLG00000002070 | small nuclear ribonucleoprotein polypeptide E [Source:NCBI gene:Acc:101173384]                                                    | -4.475864599 | 0.289224494  | 5.993360621  | 1.228656617  |
|            |     | ENSRGLG00000012059 | snrpe [Source:NCBI gene:Acc:101173384]                                                                                            | -2.594118475 | 1.480434251  | 4.669020982  | 0.594953091  |
|            |     | ENSRGLG00000007075 | sec61g [Source:NCBI gene:Acc:11001315]                                                                                            | -2.639569081 | 0.965365655  | 3.578980304  | -0.025469562 |
|            |     | ENSRGLG00000002013 | -                                                                                                                                 | -4.376841511 | -1.32178261  | 3.393184219  | 0.338610192  |
|            |     | ENSRGLG00000017324 | -                                                                                                                                 | -1.223116103 | -0.145824804 | 3.751187695  | 2.674380555  |
|            |     | ENSRGLG00000015237 | ctb3 [Source:NCBI gene:Acc:101174188]                                                                                             | 1.366021258  | 2.01189758   | 3.38219289   | 2.691535654  |
|            |     | ENSRGLG00000005015 | centromere protein Q [Source:NCBI gene:Acc:101174332]                                                                             | -0.283691967 | 0.586103183  | 3.573332909  | 2.704022663  |
|            |     | ENSRGLG00000003667 | btgqm [Source:NCBI gene:Acc:101174207]                                                                                            | -0.718692232 | 0.231484774  | 3.25319884   | 2.25627618   |
|            |     | ENSRGLG00000004376 | PPP4R3B protein phosphatase 4 regulatory subunit 3B [Source:HGNC Symbol:Acc:HGNC:29267]                                           | -1.714069121 | 0.935882642  | 3.296490009  | 0.647023112  |
|            |     | ENSRGLG00000010445 | -                                                                                                                                 | -2.352818927 | 0.080622143  | 4.39556566   | 1.962610196  |
|            |     | ENSRGLG00000008444 | ube2t [Source:NCBI gene:Acc:101156892]                                                                                            | -3.410367946 | 0.400503705  | 4.603495642  | 0.793108905  |
|            |     | ENSRGLG00000003381 | r9 [Source:NCBI gene:Acc:10110108]                                                                                                | -3.603981353 | 0.625957007  | 3.634253384  | -0.595200471 |
|            |     | ENSRGLG00000016473 | ACYP1 acylcholinesterase 1 [Source:HGNC]                                                                                          | -3.181462253 | 2.62546649   | 3.896957859  | -1.909480536 |
|            |     | ENSRGLG00000007802 | tx2b1 [Source:NCBI gene:Acc:101155302]                                                                                            | -2.536503824 | 1.078068337  | 3.195782877  | -0.419302495 |
|            |     | ENSRGLG00000010538 | HSP71A3 [Source:NCBI gene:Acc:101166978]                                                                                          | -3.736744617 | -1.367839192 | 3.672843301  | 1.244860919  |
|            |     | ENSRGLG00000003334 | usp16 [Source:ZFIN:Acc:ZDB-GENE-030131-4153]                                                                                      | -4.856042031 | 0.040521248  | 3.503443103  | -1.392634796 |
|            |     | ENSRGLG00000004697 | doun1d2b [Source:ZFIN:Acc:ZDB-GENE-040625-1]                                                                                      | -2.10795586  | 0.847969884  | 5.042851231  | 2.087413022  |
|            |     | ENSRGLG00000007253 | COMM4 [Source:NCBI gene:Acc:101165952]                                                                                            | -1.028781403 | 1.191203787  | 3.864535866  | 1.645035674  |
|            |     | ENSRGLG00000017636 | ef4eb [Source:NCBI gene:Acc:101166761]                                                                                            | 0.253778853  | 0.573597283  | 3.07883827   | 2.759514748  |
|            |     | ENSRGLG00000017809 | trappc2 [Source:NCBI gene:Acc:101168660]                                                                                          | -4.8593573   | 2.895503076  | 7.335405651  | -0.418968004 |
|            |     | ENSRGLG00000005543 | CDC37 [Source:NCBI gene:Acc:101156088]                                                                                            | -2.81307646  | 0.255805862  | 3.53612531   | 0.47111178   |
|            |     | ENSRGLG00000006644 | -                                                                                                                                 | -2.64954204  | -0.203990255 | 4.201508689  | 1.756420226  |
|            |     | ENSRGLG00000009196 | -                                                                                                                                 | -2.67042755  | 0.85294109   | 3.133595711  | -0.365220163 |
|            |     | ENSRGLG00000015785 | uncharacterized LOC101160866 [Source:NCBI gene:Acc:101160866]                                                                     | -2.089190299 | -0.550836899 | 3.312444945  | 1.774575891  |
|            |     | ENSRGLG00000007013 | pi3n [Source:ZFIN:Acc:ZDB-GENE-080204-114]                                                                                        | -1.284404387 | 1.897254602  | 3.670788565  | 0.489614712  |
|            |     | ENSRGLG00000006462 | tmem258 [Source:NCBI gene:Acc:105354217]                                                                                          | -2.843091395 | 1.686917496  | 4.639756627  | 0.110232729  |
|            |     | ENSRGLG00000008134 | -                                                                                                                                 | -4.858950663 | -0.09602417  | 5.038082075  | 0.275641072  |
| Hmt VS HmC | 340 | ENSRGLG00000008986 | gpm [Source:ZFIN:Acc:ZDB-GENE-060825-251]                                                                                         | 0.595751169  | -2.077513401 | 1.102965766  | 3.776715268  |
|            |     | ENSRGLG00000005116 | cd9p1 [Source:NCBI gene:Acc:101173632]                                                                                            | 1.672156145  | 0.198747775  | 1.710319609  | 3.184212899  |
|            |     | ENSRGLG00000001968 | COL8A1 [Source:HGNC Symbol:Acc:HGNC:2215]                                                                                         | 3.554413116  | 0.856271178  | 1.406561666  | 4.105192815  |
|            |     | ENSRGLG00000017844 | chmp5a [Source:NCBI gene:Acc:101164680]                                                                                           | 1.243887226  | -0.651105339 | 1.635162173  | 3.530639926  |
|            |     | ENSRGLG00000004422 | nek8 [Source:NCBI gene:Acc:101161178]                                                                                             | 1.245857411  | -0.32701954  | 2.913509985  | 4.486871861  |
|            |     | ENSRGLG00000005532 | wdr19 [Source:NCBI gene:Acc:101165282]                                                                                            | 0.187280701  | -0.362123335 | 2.951012282  | 3.500901361  |
|            |     | ENSRGLG00000007236 | CDHR2 [Source:HGNC Symbol:Acc:HGNC:18231]                                                                                         | 2.625814794  | -0.773085958 | -0.387868381 | 3.011516952  |
|            |     | ENSRGLG00000016124 | snap25a [Source:NCBI gene:Acc:101165388]                                                                                          | 0.654148617  | -3.663988608 | 0.712555938  | 5.031178519  |
|            |     | ENSRGLG00000013554 | UBA3 (1 of multiple) [Source:HGNC Symbol:Acc:HGNC:12470]                                                                          | 0.792611299  | -0.162601088 | 2.899170991  | 3.854868353  |
|            |     | ENSRGLG00000001216 | uncharacterized LOC101163171 [Source:NCBI gene:Acc:101163171]                                                                     | 2.784688481  | 1.009228267  | 2.692262933  | 4.46820847   |
|            |     | ENSRGLG00000003842 | cdkn2d [Source:NCBI gene:Acc:101165292]                                                                                           | 2.400958575  | 0.459634584  | 1.939393588  | 3.881202249  |
|            |     | ENSRGLG00000011838 | slc2a3b [Source:NCBI gene:Acc:101165292]                                                                                          | -2.541991047 | -5.25148045  | 1.944097701  | 4.654075948  |
|            |     | ENSRGLG00000012769 | SLC22A23 [Source:ZFIN:Acc:ZDB-GENE-121031-5]                                                                                      | 2.77603538   | 0.40139741   | 1.242076171  | 3.622144004  |
|            |     | ENSRGLG00000011855 | trtm13 [Source:ZFIN:Acc:ZDB-GENE-050822-516]                                                                                      | 2.985251118  | 0.599122498  | 1.083325639  | 3.469939021  |
|            |     | ENSRGLG00000015047 | -                                                                                                                                 | 4.945549459  | 3.076626369  | 1.432089195  | 3.30151177   |
|            |     | ENSRGLG00000014336 | -                                                                                                                                 | 4.451004496  | 2.41297507   | 1.194348988  | 3.23343814   |
|            |     | ENSRGLG00000000717 | -                                                                                                                                 | 0.39044598   | -4.181446695 | -0.781012736 | 3.791360171  |
|            |     | ENSRGLG00000002025 | -                                                                                                                                 | -0.071470689 | -1.165301806 | 2.163515071  | 3.261830458  |
|            |     | ENSRGLG00000014579 | lrtn1 [Source:ZFIN:Acc:ZDB-GENE-071126-1]                                                                                         | 5.831161831  | 2.496975988  | 1.018355462  | 4.353008406  |
|            |     | ENSRGLG00000008860 | slc5a8 [Source:ZFIN:Acc:ZDB-GENE-141211-63]                                                                                       | 14.44307628  | 11.24312042  | 2.514449521  | 5.714873158  |
|            |     | ENSRGLG00000014306 | protein FAM3C-like [Source:NCBI gene:Acc:101161238]                                                                               | 2.969142878  | 0.498219313  | 1.584623732  | 4.056034618  |
|            |     | ENSRGLG00000001690 | GRAM domain containing 2Aa [Source:ZFIN:Acc:ZDB-GENE-040724-9]                                                                    | 2.943732439  | 0.94752462   | 1.178269536  | 3.174961773  |
|            |     | ENSRGLG00000015199 | -                                                                                                                                 | 2.837595746  | 0.592786435  | 1.884307716  | 4.124006823  |
|            |     | ENSRGLG00000016169 | zmat4a [Source:ZFIN:Acc:ZDB-GENE-081104-333]                                                                                      | 14.54541279  | 12.34376867  | 1.738547138  | 3.940606395  |
|            |     | ENSRGLG00000012993 | hpd [Source:ZFIN:Acc:ZDB-GENE-040808-62]                                                                                          | 2.638133904  | 0.875158132  | 1.604615663  | 3.368077299  |

|  |                     |                |                                                                                                   |              |              |              |             |
|--|---------------------|----------------|---------------------------------------------------------------------------------------------------|--------------|--------------|--------------|-------------|
|  | ENSRORG0000000795   | sec14l7        | SEC14-like lipid binding 7 [Source:ZFIN;Acc:ZDB-GENE-141216-145]                                  | 2.501821423  | -0.154391347 | 1.395413154  | 4.052111039 |
|  | ENSRIG00000005265   | -              | -                                                                                                 | 2.637697727  | -0.347618777 | 2.202389539  | 5.188189941 |
|  | ENSRIG00000004977   | -              | -                                                                                                 | 4.148883354  | 2.159601831  | 1.444631682  | 3.43432578  |
|  | ENSRIG00000003848   | -              | -                                                                                                 | 2.493664547  | 0.3514288    | 1.776072087  | 3.918792689 |
|  | ENSRIG000000013681  | pm20d1.2       | peptidase M20 domain containing 1, tandem duplicate 2 [Source:ZFIN;Acc:ZDB-GENE-0610131-637]      | 0.815675198  | 0.692078175  | 2.960394281  | 3.084476187 |
|  | ENSRIG000000010725  | -              | -                                                                                                 | 3.333863353  | 1.495646614  | 2.353271814  | 4.191978906 |
|  | ENSRIG000000002292  | si:dkey-178e1  | si:dkey-178e171.1 [Source:ZFIN;Acc:ZDB-GENE-081104-411]                                           | 2.546418865  | 0.746230107  | 1.458151497  | 3.258825101 |
|  | ENSRIG000000011156  | -              | -                                                                                                 | 2.787058265  | 0.124495324  | 1.37898136   | 4.042029266 |
|  | ENSRIG000000007883  | -              | -                                                                                                 | 4.219956547  | 1.216782583  | 1.728816188  | 4.732369283 |
|  | ENSRIG000000003519  | zplane2        | ciliogenesis and planar polarity effector 2 [Source:ZFIN;Acc:ZDB-GENE-040912-80]                  | 1.310902635  | -0.424591049 | 2.361685932  | 4.097664651 |
|  | ENSRIG000000004941  | stag3          | sromal antigen 3 [Source:ZFIN;Acc:ZDB-GENE-140106-130]                                            | 2.794024147  | -0.129220196 | 0.883592718  | 3.807321877 |
|  | ENSRIG000000012941  | -              | -                                                                                                 | 3.2106411    | 0.273671735  | 2.586705776  | 5.52418003  |
|  | ENSRIG000000002630  | cell3a         | cugbp. Elav-like family member 3a [Source:ZFIN;Acc:ZDB-GENE-000501-2]                             | 2.292459658  | 0.026117345  | 1.397857736  | 3.664684568 |
|  | ENSRIG000000002015  | soca           | short coiled-coil protein a [Source:ZFIN;Acc:ZDB-GENE-061013-114]                                 | 2.341769617  | 0.222355419  | 0.925522677  | 3.045421954 |
|  | ENSRIG000000012887  | arpp19a        | CAMP-regulated phosphoprotein 19 [Source:NCBI;gene:Acc:101168529]                                 | 0.485354658  | -0.294368085 | 2.318305952  | 3.0985383   |
|  | ENSRIG000000003581  | dnajp4         | DnaJ heat shock protein family (Hsp40) member B4 [Source:NCBI;gene:Acc:1011170125]                | 5.952855913  | 3.447448033  | 0.798350339  | 3.304244335 |
|  | ENSRIG000000007139  | -              | -                                                                                                 | 5.10754622   | 4.721459207  | 2.714588322  | 3.101162706 |
|  | ENSRIG0000000013970 | blmh           | bleomycin hydrolase [Source:ZFIN;Acc:ZDB-GENE-030131-8485]                                        | 1.448283458  | -0.679403096 | 0.910479424  | 3.03650843  |
|  | ENSRIG000000003382  | -              | -                                                                                                 | 0.968272433  | -0.339865953 | 2.099515781  | 3.408139058 |
|  | ENSRIG000000008300  | med1           | mediator complex subunit 1 [Source:ZFIN;Acc:ZDB-GENE-081104-257]                                  | 1.872034453  | 0.28695195   | 1.520533291  | 3.106067762 |
|  | ENSRIG000000004320  | synj1          | synaptotagmin 1 [Source:ZFIN;Acc:ZDB-GENE-030131-9180]                                            | 2.098989629  | -0.072739869 | 1.088946609  | 3.261068058 |
|  | ENSRIG000000003598  | -              | -                                                                                                 | 2.097925021  | 0.150824645  | 2.800403115  | 4.747988182 |
|  | ENSRIG000000006301  | sahnd13        | sterile alpha motif domain containing 13 [Source:ZFIN;Acc:ZDB-GENE-060929-676]                    | 1.634090341  | 0.764256579  | 2.759252177  | 3.629570748 |
|  | ENSRIG000000001281  | -              | -                                                                                                 | 1.870452271  | 0.101608352  | 2.156702039  | 3.926031027 |
|  | ENSRIG000000006930  | SCN8A          | sodium voltage-gated channel alpha subunit 8 [Source:HGNC;Symbol:Acc:HGNC:10996]                  | 0.943045223  | 0.368059928  | 2.815556645  | 3.90991364  |
|  | ENSRIG000000009737  | hpk3b          | homeodomain interacting protein kinase 3b [Source:ZFIN;Acc:ZDB-GENE-030131-82]                    | 2.208336447  | -0.051507822 | 1.212744053  | 3.473074006 |
|  | ENSRIG000000011521  | -              | -                                                                                                 | 0.904684098  | -3.807140313 | 0.322340589  | 5.034650193 |
|  | ENSRIG000000016430  | ica5           | Letler congenital amaurosis 5 [Source:ZFIN;Acc:ZDB-GENE-090313-268]                               | 0.773669546  | 0.021127672  | 2.791956264  | 3.544983244 |
|  | ENSRIG000000001438  | -              | -                                                                                                 | 3.204513267  | 0.672923209  | 0.985272365  | 3.568934852 |
|  | ENSRIG000000002318  | -              | -                                                                                                 | 1.458792925  | 12.53258483  | 1.182757976  | 3.238569465 |
|  | ENSRIG000000010903  | -              | -                                                                                                 | 1.816432354  | 0.334166642  | 1.898827677  | 3.880977609 |
|  | ENSRIG000000015146  | -              | -                                                                                                 | 0.042656897  | -0.242368287 | 2.811642968  | 3.097153096 |
|  | ENSRIG000000007063  | l3gnt7         | UDP-GlcNAc:betaGal beta-1,3-N-acetylglucosaminyltransferase 7 [Source:ZFIN;Acc:ZDB-GENE-021210-4] | 15.34224451  | 13.55704242  | 1.617383603  | 3.403053262 |
|  | ENSRIG000000016408  | si:dkey-1112.3 | echinoderm microtubule associated protein like 5 [Source:HGNC;Symbol:Acc:HGNC:18197]              | 1.69854908   | 0.239166313  | 1.720975596  | 3.180842328 |
|  | ENSRIG000000017123  | stum           | stum, mechanosensory transduction mediator homolog [Source:ZFIN;Acc:ZDB-GENE-041014-164]          | 1.905809895  | 0.072983231  | 1.267475802  | 3.100787442 |
|  | ENSRIG000000006454  | CYP4F2         | cytochrome P450 family 4 subfamily F member 2 [Source:HGNC;Symbol:Acc:HGNC:2645]                  | 2.66319324   | -0.039212848 | 0.684077494  | 3.38969616  |
|  | ENSRIG000000011168  | MTCO18B        | mtc18b [Source:HGNC;Symbol:Acc:HGNC:18150]                                                        | 1.574216876  | 1.938498474  | 0.589090075  | 4.102284722 |
|  | ENSRIG000000006506  | -              | -                                                                                                 | 2.250430988  | 0.425485632  | 1.200698538  | 3.02613198  |
|  | ENSRIG000000008548  | slitrk4        | SLIT and NTRK-like family, member 4 [Source:ZFIN;Acc:ZDB-GENE-140303-1]                           | 13.71449775  | 11.72795023  | 2.583734359  | 4.570747894 |
|  | ENSRIG000000016151  | slfz2a         | vesicle transport protein Slfz2b-like [Source:NCBI;gene:Acc:101171820]                            | 0.568667419  | -0.289705377 | 2.382107133  | 3.249864259 |
|  | ENSRIG000000006925  | rgra           | retinal G protein coupled receptor a [Source:ZFIN;Acc:ZDB-GENE-040924-6]                          | 2.893860865  | 0.326483796  | 2.404645813  | 4.972502663 |
|  | ENSRIG000000012832  | -              | -                                                                                                 | 2.160740659  | 0.402898633  | 1.66665706   | 3.4248831   |
|  | ENSRIG000000016707  | -              | -                                                                                                 | 2.709896117  | -0.319812999 | 2.119010717  | 5.149308803 |
|  | ENSRIG000000002984  | sl             | slizzed [Source:ZFIN;Acc:ZDB-GENE-030530-1]                                                       | 14.30194242  | 12.47404976  | 1.603499783  | 3.45607793  |
|  | ENSRIG000000010185  | si:dkey-222n6  | keratin 73 [Source:HGNC;Symbol:Acc:HGNC:28928]                                                    | 2.823324877  | -0.724403258 | 0.258580889  | 3.806795833 |
|  | ENSRIG000000007401  | stox1          | storkhead box 1 [Source:ZFIN;Acc:ZDB-GENE-030225-2]                                               | 3.79397496   | 1.206270954  | 0.677451938  | 3.265643366 |
|  | ENSRIG000000005785  | si:dkey-290l1  | si:dkey-290l1.3 [Source:ZFIN;Acc:ZDB-GENE-100922-178]                                             | 2.291736575  | 0.45764284   | 2.14340464   | 3.977982091 |
|  | ENSRIG000000003120  | meiob          | meiosis specific with OB domains [Source:ZFIN;Acc:ZDB-GENE-120104-8]                              | 1.913936883  | 0.777958778  | 2.730890135  | 3.867353198 |
|  | ENSRIG000000008990  | -              | -                                                                                                 | 15.18648261  | 11.15022963  | 2.056752296  | 6.093471715 |
|  | ENSRIG000000006275  | -              | -                                                                                                 | 2.194103113  | -0.519243428 | 0.908334592  | 3.622166119 |
|  | ENSRIG000000015461  | mod1           | MAX dimerization protein 1 [Source:ZFIN;Acc:ZDB-GENE-080528-246]                                  | 2.121776981  | 0.079297579  | 1.388295275  | 3.431259831 |
|  | ENSRIG000000004615  | ago2           | argonaute RISC catalytic component 2 [Source:ZFIN;Acc:ZDB-GENE-110606-6]                          | 1.944821069  | 0.859891609  | 2.701778829  | 3.787192435 |
|  | ENSRIG000000002474  | HOMER1         | homer scaffold protein 1 [Source:HGNC;Symbol:Acc:HGNC:17512]                                      | 1.897199174  | -0.04347905  | 1.15305311   | 3.094216375 |
|  | ENSRIG000000018688  | -              | -                                                                                                 | 1.878424845  | -0.40244726  | 2.013234761  | 4.294592106 |
|  | ENSRIG000000006273  | -              | -                                                                                                 | 1.869413588  | 0.11342759   | 2.218687926  | 3.833024028 |
|  | ENSRIG000000006691  | mak            | male germ cell-associated kinase [Source:ZFIN;Acc:ZDB-GENE-030131-7279]                           | 3.040797419  | 0.873751813  | 2.581412089  | 4.748942467 |
|  | ENSRIG000000007894  | pal3x1a        | galactose-3-O-sulfotransferase 1 [Source:NCBI;gene:Acc:101172098]                                 | 2.78974256   | -0.314318458 | 1.481871348  | 4.586325461 |
|  | ENSRIG000000008907  | -              | -                                                                                                 | 3.238723144  | -0.123102033 | 0.650589229  | 4.017647207 |
|  | ENSRIG000000011357  | palnt17        | polypeptide N-acetylglucosaminyltransferase 17 [Source:ZFIN;Acc:ZDB-GENE-110418-3]                | 4.26423963   | 1.31870004   | 0.795626159  | 3.741651405 |
|  | ENSRIG000000016639  | angel1         | angel homolog 1 (Drosophila) [Source:ZFIN;Acc:ZDB-GENE-111020-12]                                 | 1.944792327  | 0.367452655  | 1.749692158  | 3.327516779 |
|  | ENSRIG000000009374  | DISL2          | DIS2 like 3'-5' exonuclease 2 [Source:HGNC;Symbol:Acc:HGNC:28648]                                 | 0.959425389  | 0.042318415  | 2.530237844  | 3.447829858 |
|  | ENSRIG000000012512  | tiparp         | TCDD-inducible poly(ADP-ribose) polymerase [Source:ZFIN;Acc:ZDB-GENE-031002-47]                   | 1.947958344  | -0.730611878 | 0.3612979    | 3.040353146 |
|  | ENSRIG000000003008  | -              | -                                                                                                 | -0.010512066 | -0.712048849 | 2.80026765   | 3.502248367 |
|  | ENSRIG000000001687  | psat1          | phosphoserine aminotransferase 1 [Source:ZFIN;Acc:ZDB-GENE-030131-5723]                           | -0.42183032  | -4.773948986 | -1.297272038 | 3.055331418 |
|  | ENSRIG000000017484  | -              | -                                                                                                 | 2.186769203  | -0.288488633 | 1.28960432   | 3.745347245 |
|  | ENSRIG000000005304  | adam10b        | ADAM metalloproteinase domain 10b [Source:ZFIN;Acc:ZDB-GENE-071115-1]                             | 1.770490564  | 0.368992841  | 1.616558648  | 3.018541294 |
|  | ENSRIG000000006135  | rip2           | Rib interacting lysosomal protein like 2 [Source:NCBI;gene:Acc:101159444]                         | 2.308267879  | 0.676966029  | 2.08012053   | 3.71189784  |
|  | ENSRIG000000005115  | tmprss5        | transmembrane serine protease 5 [Source:ZFIN;Acc:ZDB-GENE-131121-184]                             | 4.012419025  | -0.327570615 | 2.042841386  | 6.383318937 |
|  | ENSRIG000000013999  | apoa2          | uncharacterized LOC101163028 [Source:NCBI;gene:Acc:101163028]                                     | 1.193878907  | -3.130936736 | 0.326748196  | 4.652048095 |
|  | ENSRIG000000010484  | lvsn2          | forkhead box P2 [Source:ZFIN;Acc:ZDB-GENE-041203-2]                                               | 1.59272690   | -1.012941832 | 0.946240554  | 3.552397407 |
|  | ENSRIG000000007704  | ubash3b        | ubiquitin associated and SH3 domain containing Ba [Source:ZFIN;Acc:ZDB-GENE-060526-172]           | 1.856019575  | -0.270331715 | 1.275298616  | 3.402134887 |
|  | ENSRIG000000009621  | znc161989      | znc161989 [Source:ZFIN;Acc:ZDB-GENE-030131-2997]                                                  | 2.038368899  | -0.67499823  | 0.582702486  | 3.2965551   |
|  | ENSRIG000000003831  | si:dkey-323a3  | si:dkey-323a3 [Source:ZFIN;Acc:ZDB-GENE-030131-2997]                                              | 4.231314848  | 1.78011482   | 1.51172844   | 3.975511678 |
|  | ENSRIG000000003270  | SEMA3B         | semaphorin 3B [Source:HGNC;Symbol:Acc:HGNC:10724]                                                 | 2.11264755   | -0.385873576 | 1.102752352  | 3.602375555 |
|  | ENSRIG000000005523  | si:dkey-231i2  | glycoprotein hormone beta-5-like [Source:NCBI;gene:Acc:101171780]                                 | 13.23120618  | 0            | 2.718894648  | 15.95059303 |

|                      |             |                                                                                                     |              |              |              |             |
|----------------------|-------------|-----------------------------------------------------------------------------------------------------|--------------|--------------|--------------|-------------|
| ENSORLG00000010545   | msantd4     | Myb/SANT-like DNA-binding domain containing 4 with coiled-coils [Source:ZFIN;Acc:ZDB-GENE-121023-2] | 3.012733406  | 0.910678894  | 0.959241141  | 3.0617805   |
| ENSORLG00000011565   | -           | -                                                                                                   | 3.572279511  | 0.345427188  | 2.937513084  | 6.1648528   |
| ENSORLG00000002107   | -           | -                                                                                                   | 15.46273231  | 13.75475391  | 1.472700091  | 3.181146087 |
| ENSORLG000000010615  | -           | -                                                                                                   | 14.27924928  | 11.2567807   | 1.409513966  | 4.432450646 |
| ENSORLG000000011928  | tmem151ba   | transmembrane protein 151Ba [Source:ZFIN;Acc:ZDB-GENE-070820-12]                                    | 13.58289701  | 8.530835473  | 2.230109891  | 7.282623406 |
| ENSORLG000000000863  | DDX5        | DEAD-box helicase 5 [Source:HGNC Symbol;Acc:HGNC:2746]                                              | 2.616430232  | -0.137348152 | 0.301384284  | 3.05644756  |
| ENSORLG000000012509  | -           | -                                                                                                   | 2.118487894  | 0.066290829  | 1.527677738  | 3.580309953 |
| ENSORLG000000014192  | gpm1a       | glutamate metabotropic receptor 1 [Source:NCBI gene;Acc:101165118]                                  | 3.422289171  | -1.53645572  | 2.048055971  | 7.007283784 |
| ENSORLG000000011640  | -           | -                                                                                                   | 2.018476154  | -1.046119879 | 2.104006572  | 5.167091788 |
| ENSORLG000000000605  | -           | -                                                                                                   | 3.760836977  | 2.061318305  | 2.311947398  | 4.011948665 |
| ENSORLG000000001588  | GRXCR2      | glutaredoxin and cysteine rich domain containing 2 [Source:HGNC Symbol;Acc:HGNC:33862]              | 2.064331086  | 0.484886976  | 2.101223065  | 3.681151828 |
| ENSORLG000000000670  | -           | -                                                                                                   | 2.613267491  | 0.013268822  | 2.15015609   | 4.750641838 |
| ENSORLG000000016305  | -           | -                                                                                                   | 2.00872946   | -0.250996847 | 1.333849693  | 3.594061158 |
| ENSORLG000000016692  | -           | -                                                                                                   | 13.45527941  | 0            | 2.114439394  | 15.87223949 |
| ENSORLG000000012938  | kcrik10b    | potassium channel, subfamily K, member 10b [Source:ZFIN;Acc:ZDB-GENE-050420-31]                     | 15.18925395  | 9.560714954  | 1.260694119  | 6.889705908 |
| ENSORLG000000007323  | tchp        | trichoplein, keratin filament binding [Source:ZFIN;Acc:ZDB-GENE-060421-3368]                        | 0.12007356   | -0.636282921 | 2.394883618  | 3.151724829 |
| ENSORLG000000005999  | -           | -                                                                                                   | 0.566478259  | -2.043493682 | 1.067568506  | 3.677024171 |
| ENSORLG000000002636  | csdc2a      | cold shock domain containing C2, RNA binding a [Source:ZFIN;Acc:ZDB-GENE-040719-442]                | 15.38636673  | 0            | 0.818320454  | 16.20517889 |
| ENSORLG000000005680  | edrf1       | erythroid differentiation regulatory factor 1 [Source:ZFIN;Acc:ZDB-GENE-131121-620]                 | 2.996770211  | 0.422514065  | 0.65863365   | 3.233374267 |
| ENSORLG000000006451  | -           | -                                                                                                   | 15.38312213  | 12.72864757  | 0.898977963  | 3.533820343 |
| ENSORLG0000000014293 | kcni11      | ATP-sensitive inward rectifier potassium channel 11 [Source:NCBI gene;Acc:101160728]                | 3.695657261  | 0.341947421  | 0.135279602  | 3.489473941 |
| ENSORLG000000004150  | -           | -                                                                                                   | 1.228487201  | -0.304604528 | 2.287040559  | 3.800617012 |
| ENSORLG000000004863  | -           | -                                                                                                   | 1.924743889  | 0.941038372  | 2.338459676  | 3.320380552 |
| ENSORLG0000000011797 | fbx2        | F-box and leucine-rich repeat protein 2 [Source:ZFIN;Acc:ZDB-GENE-030925-12]                        | 2.234393702  | 0.16514408   | 1.684570128  | 3.754304386 |
| ENSORLG000000001386  | hpk         | endoplasmic reticulum junction formation protein lunapark-B [Source:NCBI gene;Acc:101167978]        | -0.233043704 | -0.594629313 | 2.64211218   | 3.00418269  |
| ENSORLG000000006082  | -           | -                                                                                                   | 14.57665086  | 0            | 2.174822415  | 16.75196477 |
| ENSORLG000000013631  | C7orf43     | chromosome 7 open reading frame 43 [Source:HGNC Symbol;Acc:HGNC:25604]                              | 1.605994731  | 0.141891163  | 2.335383188  | 3.797517108 |
| ENSORLG000000011739  | zgc:153343  | GDP-D-glucose phosphorylase 1 [Source:HGNC Symbol;Acc:HGNC:24360]                                   | 1.97431704   | 1.10855925   | 2.857081849  | 3.723028736 |
| ENSORLG000000006074  | ift80       | intraflagellar transport 80 homolog (Chlamydomonas) [Source:ZFIN;Acc:ZDB-GENE-041212-50]            | 0.988372843  | -0.042122311 | 2.17644972   | 3.207429636 |
| ENSORLG000000005393  | seomesb     | seomesb domain homolog b [Source:ZFIN;Acc:ZDB-GENE-070318-1]                                        | 0.715330152  | -0.847103387 | 1.518943357  | 3.081861986 |
| ENSORLG000000017953  | nrlj2       | nuclear receptor subfamily 1, group 1, member 2 [Source:ZFIN;Acc:ZDB-GENE-030903-3]                 | -0.677931313 | -2.450476676 | 1.236163849  | 3.009194395 |
| ENSORLG000000018104  | traf3ip1    | TNF receptor-associated factor 3 interacting protein 1 [Source:ZFIN;Acc:ZDB-GENE-040426-1146]       | -0.215714219 | -1.341895374 | 2.610750231  | 3.737416458 |
| ENSORLG000000012973  | -           | -                                                                                                   | 4.753959024  | 2.516794316  | 2.308101166  | 4.545756263 |
| ENSORLG000000002121  | me1         | malic enzyme 1, NAD(P)+-dependent, cytosolic [Source:ZFIN;Acc:ZDB-GENE-061013-438]                  | 1.174970806  | -0.816337214 | 2.403369421  | 4.395162499 |
| ENSORLG000000013928  | ush1gb      | Usher syndrome type-1G protein homolog [Source:NCBI gene;Acc:101174708]                             | 13.81991162  | 9.009464749  | 1.989909213  | 6.800819811 |
| ENSORLG000000000371  | -           | -                                                                                                   | 5.694318137  | -9.45489558  | 1.381428838  | 16.5311545  |
| ENSORLG000000000334  | tppp3       | tubulin polymerization-promoting protein family member 3 [Source:NCBI gene;Acc:101170163]           | 2.589473833  | 0.012074294  | 2.224364466  | 4.802249102 |
| ENSORLG000000000721  | -           | -                                                                                                   | 3.493493364  | 0.892212544  | 2.133315347  | 4.735090715 |
| ENSORLG000000007903  | -           | -                                                                                                   | 1.923531849  | 0.110561819  | 2.223243196  | 4.036688289 |
| ENSORLG000000002477  | pell1b      | G3 ultraligin protein fagge pelliro homolog 1 [Source:NCBI gene;Acc:1011671979]                     | 1.059740665  | -0.459709837 | 1.997453337  | 3.511788776 |
| ENSORLG000000001056  | -           | -                                                                                                   | 2.406332892  | -1.711674725 | -0.820298037 | 3.29728331  |
| ENSORLG000000006350  | arl3b       | ADP-ribosylation factor-like 13b [Source:ZFIN;Acc:ZDB-GENE-021217-3]                                | 1.822607649  | -0.10441531  | 1.622238815  | 3.549744548 |
| ENSORLG000000013109  | rhp1        | rhophilin, Rho GTPase binding protein 1 [Source:ZFIN;Acc:ZDB-GENE-081031-79]                        | 2.217009939  | 0.370445395  | 2.036129663  | 3.883180298 |
| ENSORLG000000010499  | hnmp3       | heterogeneous nuclear ribonucleoprotein H3 (ZH9) [Source:ZFIN;Acc:ZDB-GENE-060421-3878]             | 1.670921725  | -0.331170778 | 2.000434283  | 4.003011567 |
| ENSORLG000000010631  | -           | -                                                                                                   | 1.972224532  | -0.342339798 | 2.926756668  | 5.241805878 |
| ENSORLG000000000846  | hapin4      | hyaluronan and proteoglycan link protein 4 [Source:ZFIN;Acc:ZDB-GENE-060503-243]                    | 2.393144708  | -0.185913095 | 1.289934297  | 3.869477857 |
| ENSORLG000000012657  | d3n3        | catyntenin 3 [Source:ZFIN;Acc:ZDB-GENE-109921-73]                                                   | 4.525304294  | 0.361623697  | 0.824081142  | 4.988252452 |
| ENSORLG000000002849  | dnc1        | DNA meiotic recombinase 1 [Source:ZFIN;Acc:ZDB-GENE-060331-39]                                      | 1.05144237   | -0.334607797 | 1.827705317  | 3.21424041  |
| ENSORLG000000017638  | -           | -                                                                                                   | 3.717975325  | -1.174651683 | 0.702453564  | 5.595563536 |
| ENSORLG000000014776  | -           | -                                                                                                   | 0.84509086   | -1.20783742  | 1.335833551  | 3.389246523 |
| ENSORLG000000016444  | zgc:77486   | ANI-type zinc finger protein 5 [Source:NCBI gene;Acc:101174824]                                     | 1.300422541  | 0.107845339  | 2.947484727  | 4.140546906 |
| ENSORLG000000016789  | -           | -                                                                                                   | 1.31829086   | -0.590227896 | 2.100176302  | 4.009179942 |
| ENSORLG000000016886  | dgkb        | diacylglycerol kinase, beta [Source:ZFIN;Acc:ZDB-GENE-070126-1]                                     | 2.453820928  | -0.817058029 | 0.803547383  | 4.074911702 |
| ENSORLG000000015241  | ATF5        | activating transcription factor 5 [Source:HGNC Symbol;Acc:HGNC:790]                                 | 2.771830834  | -0.739997955 | -0.158427423 | 3.353886237 |
| ENSORLG000000014485  | -           | -                                                                                                   | 15.30449072  | 10.29923092  | 2.28524432   | 7.270972502 |
| ENSORLG000000016383  | itm2        | fat storage-inducing transmembrane protein 2 [Source:ZFIN;Acc:ZDB-GENE-050508-6]                    | 1.394050377  | -1.159942902 | 0.73504218   | 3.30753252  |
| ENSORLG000000001279  | -           | -                                                                                                   | 2.540373115  | 0.235110459  | 1.540113409  | 3.848868029 |
| ENSORLG000000007192  | sgsm1a      | small G protein signaling modulator 1a [Source:ZFIN;Acc:ZDB-GENE-060526-379]                        | 3.41405037   | 2.491487719  | 2.358011866  | 3.281059894 |
| ENSORLG000000010273  | rx1a        | regulatory factor X 1a (influences HLA class II expression) [Source:ZFIN;Acc:ZDB-GENE-070424-94]    | 2.216909834  | 0.338455886  | 1.826832529  | 3.705771027 |
| ENSORLG000000011139  | -           | -                                                                                                   | 14.30823663  | 13.5386982   | 2.230134638  | 3.000140621 |
| ENSORLG000000005070  | unk1        | unknown family zinc finger-like [Source:ZFIN;Acc:ZDB-GENE-131120-196]                               | 1.961043023  | 0.739284137  | 2.259147513  | 3.481391071 |
| ENSORLG000000009630  | sdkey-256k1 | zinc finger protein 512B [Source:HGNC Symbol;Acc:HGNC:29212]                                        | 2.784447384  | 1.524412893  | 2.068521366  | 3.329040581 |
| ENSORLG000000011566  | -           | -                                                                                                   | 6.571854188  | 4.146727284  | 0.627099929  | 3.052695046 |
| ENSORLG000000005350  | FAM53C      | family with sequence similarity 53 member C [Source:HGNC Symbol;Acc:HGNC:1336]                      | 1.08115078   | -0.259061017 | 2.696296181  | 4.036993033 |
| ENSORLG000000021159  | RF00001     | -                                                                                                   | 0.870673301  | -1.822695342 | 0.95454693   | 3.648400432 |
| ENSORLG0000000013431 | FAM135B     | family with sequence similarity 135 member B [Source:HGNC Symbol;Acc:HGNC:28029]                    | 3.548735392  | 0.342623808  | 2.326545094  | 5.533144424 |
| ENSORLG000000000590  | -           | -                                                                                                   | 14.11836886  | 11.50722478  | 2.095753182  | 4.707361551 |
| ENSORLG000000016194  | cc232a      | coiled-coil and C2 domain containing 2A [Source:ZFIN;Acc:ZDB-GENE-030131-2291]                      | 0.315607712  | -0.703194912 | 2.264470541  | 3.283757933 |
| ENSORLG000000016150  | -           | -                                                                                                   | 1.045560145  | -0.674102518 | 2.864411204  | 4.58455885  |
| ENSORLG000000016377  | tmem169b    | transmembrane protein 169b [Source:ZFIN;Acc:ZDB-GENE-141211-51]                                     | 3.754790835  | 2.427953721  | 2.009653654  | 3.33697678  |
| ENSORLG000000010528  | hank4       | RN motif and ankyrin repeat domains 4 [Source:ZFIN;Acc:ZDB-GENE-120423-1]                           | 1.747831231  | -0.155059024 | 1.803734629  | 3.707109666 |
| ENSORLG000000007770  | neto1       | neuropilin (NRP) and tolloid (TL)-like 1, like [Source:ZFIN;Acc:ZDB-GENE-091207-1]                  | 13.81559944  | 11.82655246  | 2.462502868  | 4.452017813 |
| ENSORLG000000012349  | caorb3a     | calcium channel, voltage-dependent, beta 3a [Source:ZFIN;Acc:ZDB-GENE-060221-2]                     | 2.518117567  | 1.121559179  | 2.384594506  | 3.78163841  |
| ENSORLG000000013931  | -           | -                                                                                                   | 2.72863095   | -1.00485039  | 2.688802143  | 6.432775738 |

|                     |                       |                                                                                                            |              |              |              |             |
|---------------------|-----------------------|------------------------------------------------------------------------------------------------------------|--------------|--------------|--------------|-------------|
| ENSORLG0000003586   | dzfp1                 | DAZ interacting zinc finger protein 1 [Source:ZFIN,Acc:ZDB-GENE-040526-11]                                 | 0.899670812  | -0.812964966 | 1.77434922   | 3.487465363 |
| ENSORLG0000000329   | zfhhc1                | zinc finger, DHHC-type containing 1 [Source:ZFIN,Acc:ZDB-GENE-130925-1]                                    | 1.90146047   | 0.768821792  | 2.609640543  | 3.742764138 |
| ENSORLG0000001516   | dd2a                  | discoidin domain receptor tyrosine kinase 2a [Source:ZFIN,Acc:ZDB-GENE-090316-2]                           | 3.141573301  | 0.83337165   | 1.794601087  | 4.103291162 |
| ENSORLG00000005132  | zfhhc21               | zinc finger, DHHC-type containing 21 [Source:ZFIN,Acc:ZDB-GENE-080401-2]                                   | 2.717981159  | 0.843656779  | 1.539548161  | 3.414327274 |
| ENSORLG00000001367  | -                     | -                                                                                                          | 2.934018061  | 0.728033483  | 1.458813739  | 3.66528367  |
| ENSORLG00000015540  | racgap1               | Rac GTPase activating protein 1 [Source:ZFIN,Acc:ZDB-GENE-030131-1917]                                     | 1.390786686  | 0.551389214  | 2.465116127  | 3.304989352 |
| ENSORLG00000010509  | dna4b                 | dymrin, axonemal, light chain 4b [Source:ZFIN,Acc:ZDB-GENE-050208-510]                                     | 0.210342037  | -0.528629099 | 2.483094316  | 3.222549892 |
| ENSORLG00000013343  | lyns5                 | lynceus like 5 [Source:NCBI gene:Acc-100524201]                                                            | 2.031403925  | 1.400302402  | 2.67279669   | 3.304316002 |
| ENSORLG00000010885  | fam219ab              | krroten FAM219A [Source:NCBI gene:Acc-101166139]                                                           | 4.020391883  | 1.230917461  | 2.512297438  | 5.30224568  |
| ENSORLG00000013865  | sphx4                 | sphingosine hydrolase 4 [Source:ZFIN,Acc:ZDB-GENE-080227-1]                                                | 1.72959053   | -0.256661917 | 2.125962863  | 4.112699606 |
| ENSORLG00000007535  | nrngna                | neurogranin (protein kinase C substrate, RC3) a [Source:ZFIN,Acc:ZDB-GENE-090710-6]                        | 1.895871889  | 0.42320392   | 1.824987428  | 3.298139555 |
| ENSORLG00000006801  | casp3                 | Oryzias latipes caspase 3 (casp3), mRNA [Source:RefSeq mRNA,Acc:NM_001104670]                              | 1.210481203  | -2.028830763 | 0.508469279  | 3.748266599 |
| ENSORLG00000006312  | slc25a22a             | solute carrier family 25 member 22a [Source:ZFIN,Acc:ZDB-GENE-110408-61]                                   | 1.998511952  | 0.379405843  | 1.62813939   | 3.247730463 |
| ENSORLG00000016333  | rapunzel4 (1 of many) | rapunzel4 4 [Source:ZFIN,Acc:ZDB-GENE-060417-472]                                                          | 1.893882362  | 0.608858175  | 1.80157907   | 3.086088317 |
| ENSORLG0000003068   | ttk1a                 | tau tubulin kinase 1a [Source:ZFIN,Acc:ZDB-GENE-100609-4]                                                  | 2.48697696   | -0.081630315 | 0.784932272  | 3.354026371 |
| ENSORLG00000003904  | -                     | -                                                                                                          | 1.869071233  | -0.854393631 | 1.184190792  | 3.90814045  |
| ENSORLG00000004927  | -                     | -                                                                                                          | 15.46140367  | 13.65424666  | 2.230931211  | 4.038556035 |
| ENSORLG00000006876  | chst3a                | carbohydrate (chondroitin 6) sulfotransferase 3a [Source:ZFIN,Acc:ZDB-GENE-090312-180]                     | 3.110631642  | 0.851400117  | 2.02609674   | 4.285724277 |
| ENSORLG00000002238  | il2bb                 | interleukin-12 subunit beta [Source:NCBI gene:Acc-10115453]                                                | 3.39547264   | 0.688039441  | 0.882646763  | 3.590569603 |
| ENSORLG0000001084   | wab2                  | WD repeat and SCAN2 box containing 2 [Source:ZFIN,Acc:ZDB-GENE-081104-26]                                  | 2.971208894  | -0.00156603  | 0.443998496  | 3.417258503 |
| ENSORLG00000041386  | tomn34                | translocase of outer mitochondrial membrane 34 [Source:ZFIN,Acc:ZDB-GENE-030131-2081]                      | 2.419256612  | 0.866246505  | 2.094726186  | 3.648221316 |
| ENSORLG00000016528  | PTGR1                 | prostaglandin reductase 1 [Source:NCBI gene:Acc-101158478]                                                 | 2.551297694  | -0.235719944 | 0.291867404  | 3.07937093  |
| ENSORLG00000013994  | waf1                  | WAF5 protein family member 1 [Source:NCBI gene:Acc-101159716]                                              | 2.203033815  | -0.23955544  | 0.765446932  | 3.208521106 |
| ENSORLG00000009849  | odf3b                 | outer dense fiber protein 3-B [Source:NCBI gene:Acc-101159189]                                             | 15.56411584  | 0            | 1.628877495  | 17.19348493 |
| ENSORLG00000007787  | vax2                  | ventral anterior homeobox 2 [Source:ZFIN,Acc:ZDB-GENE-030904-8]                                            | 13.51246271  | 11.81239393  | 2.402850941  | 4.103387401 |
| ENSORLG00000009929  | nuf2                  | NUF2, NDC80 kinetochore complex component, homolog [Source:ZFIN,Acc:ZDB-GENE-040426-1121]                  | 0.109294608  | -1.404874228 | 2.053462699  | 3.568116386 |
| ENSORLG00000011823  | -                     | -                                                                                                          | 0.122285653  | -1.352306309 | 2.984490143  | 4.45967012  |
| ENSORLG00000007179  | tm4d5                 | transmembrane 4 L six family member 5 [Source:NCBI gene:Acc-101168575]                                     | 3.4804034    | 1.102061806  | 0.655610061  | 3.034433218 |
| ENSORLG00000000094  | atcc10                | ATP-binding cassette, sub-family C (CFTR/MRP), member 10 [Source:ZFIN,Acc:ZDB-GENE-060617-24]              | -0.620686489 | -2.85943312  | 0.79939906   | 3.038571567 |
| ENSORLG00000015623  | tbl1                  | tubulin tyrosine ligase-like family, member 1 [Source:ZFIN,Acc:ZDB-GENE-040426-1326]                       | 0.738524842  | 0.156239873  | 2.876536615  | 3.459306446 |
| ENSORLG00000015190  | -                     | -                                                                                                          | 4.338980691  | 3.140730151  | 2.452715784  | 3.651451318 |
| ENSORLG00000000597  | -                     | uncharacterized LOC101174083 [Source:NCBI gene:Acc-101174083]                                              | 14.34812506  | 13.05090773  | 2.516518027  | 3.814150479 |
| ENSORLG00000015417  | dhd1b                 | DHD1 domain containing 1b [Source:ZFIN,Acc:ZDB-GENE-040724-18]                                             | 2.79817358   | 0.846125733  | 1.264914861  | 3.217449209 |
| ENSORLG00000006711  | placd2                | phosphatidylinositol-specific phospholipase C, X domain containing 2 [Source:ZFIN,Acc:ZDB-GENE-091204-217] | 2.36016214   | 2.290288666  | 2.993139407  | 3.063503391 |
| ENSORLG00000001053  | -                     | -                                                                                                          | 3.858310652  | 1.488607776  | 0.845360503  | 3.12555098  |
| ENSORLG00000015081  | ciapin1               | cytokine induced apoptosis inhibitor 1 [Source:NCBI gene:Acc-101167114]                                    | 1.674532552  | -0.062119747 | 1.664815216  | 3.401952508 |
| ENSORLG00000008862  | cep112                | centrosomal protein 112 [Source:ZFIN,Acc:ZDB-GENE-120104-2]                                                | 0.123583392  | -0.776594915 | 2.279970247  | 3.180633751 |
| ENSORLG000000010158 | scpata18              | spermatogenesis associated 18 [Source:ZFIN,Acc:ZDB-GENE-050522-306]                                        | 2.32601068   | 0.063562441  | 2.10827327   | 4.371206464 |
| ENSORLG00000014949  | bbs2                  | Bardet-Biedl syndrome 2 [Source:ZFIN,Acc:ZDB-GENE-020801-1]                                                | 1.133942455  | -0.240239512 | 1.951755453  | 3.326422319 |
| ENSORLG00000006879  | carmap2a              | calmodulin regulated spectrin-associated protein family, member 2a [Source:ZFIN,Acc:ZDB-GENE-030131-3016]  | 0.56851256   | -1.040065567 | 2.113234168  | 3.722297359 |
| ENSORLG00000014131  | -                     | -                                                                                                          | 1.226304753  | 0.255161401  | 2.193619158  | 3.165247487 |
| ENSORLG00000013927  | -                     | -                                                                                                          | 0.662714462  | -0.758439367 | 1.583138512  | 3.004778849 |
| ENSORLG00000011794  | -                     | -                                                                                                          | 1.433698381  | -0.17504985  | 1.639597445  | 3.22076918  |
| ENSORLG00000001219  | col7a1                | collagen, type VII, alpha 1 [Source:ZFIN,Acc:ZDB-GENE-030131-2427]                                         | 4.62146105   | 3.696965024  | 2.297620014  | 3.22258423  |
| ENSORLG00000011343  | fam124b               | family with sequence similarity 124B [Source:ZFIN,Acc:ZDB-GENE-130327-1]                                   | 1.829121316  | 0.425177232  | 2.977823223  | 4.382252718 |
| ENSORLG00000012073  | casp2                 | caspase 2, apoptosis-related cysteine peptidase [Source:ZFIN,Acc:ZDB-GENE-030825-3]                        | 2.365061641  | 0.347505897  | 1.267317359  | 3.285357923 |
| ENSORLG00000004950  | ottn3a1               | ottnadin 3a, tandem duplicate 1 [Source:ZFIN,Acc:ZDB-GENE-081030-10]                                       | 3.01305448   | 1.094256275  | 1.343669451  | 3.262949015 |
| ENSORLG00000010853  | rtm4r2a               | reticulon-4 receptor-like 2 [Source:NCBI gene:Acc-101165094]                                               | 3.599441101  | 0.310230629  | 0.244514949  | 3.534210061 |
| ENSORLG00000009006  | hdac3                 | histone deacetylase 3 [Source:NCBI gene:Acc-101165094]                                                     | 2.170544817  | 0.213254879  | 1.156840095  | 3.11461491  |
| ENSORLG00000010964  | thox8                 | H-to-h exonin 8 [Source:NCBI gene:Acc-101166195]                                                           | 1.521081961  | 0.717903507  | 2.789350602  | 3.593014064 |
| ENSORLG00000004115  | -                     | -                                                                                                          | 1.942573735  | 2.236339477  | 1.921748133  | 4.33686971  |
| ENSORLG00000002745  | si ch73-139e5         | si ch73-139e5 2 [Source:ZFIN,Acc:ZDB-GENE-130631-471]                                                      | 5.380297738  | 2.062737544  | 0.671792146  | 3.989840551 |
| ENSORLG00000007589  | -                     | -                                                                                                          | 1.310857549  | -0.00060899  | 1.738990449  | 3.050931979 |
| ENSORLG00000007646  | ortac1b               | cartilage acidic protein 1b [Source:ZFIN,Acc:ZDB-GENE-090312-28]                                           | 14.94188117  | 0            | 0.86330219   | 15.80567486 |
| ENSORLG0000003182   | syn1                  | synapsin I [Source:ZFIN,Acc:ZDB-GENE-081105-90]                                                            | 2.257899561  | -0.392382501 | 1.427386885  | 4.078141604 |
| ENSORLG0000003834   | WIP1                  | WD repeat domain phosphoinositide interacting 1 [Source:HGNC Symbol,Acc:HGNC:25471]                        | 1.885598161  | -0.012725764 | 2.434547149  | 4.33356194  |
| ENSORLG00000004467  | -                     | -                                                                                                          | 2.12525028   | -0.095268781 | 1.625546007  | 3.841848007 |
| ENSORLG00000006294  | -                     | -                                                                                                          | 1.91054746   | 0.11524322   | 2.538894432  | 4.33686971  |
| ENSORLG00000003474  | nrtd1b                | naradiysin D (N-arginine dibasic convertase) [Source:ZFIN,Acc:ZDB-GENE-050208-422]                         | 2.956136161  | 0.33919282   | 1.233091857  | 3.850521172 |
| ENSORLG00000006155  | esm1                  | endothelial cell-specific molecule 1 [Source:ZFIN,Acc:ZDB-GENE-060929-748]                                 | 2.993509394  | 1.39582784   | 1.660900113  | 3.259063467 |
| ENSORLG00000006753  | -                     | -                                                                                                          | 4.426121616  | 1.425890439  | 0.788020389  | 3.768734357 |
| ENSORLG00000009752  | elov5                 | ELCV, lity acid elongase 5 [Source:NCBI gene:Acc-101168981]                                                | 3.395848626  | 1.498985454  | 2.766783816  | 4.664130845 |
| ENSORLG00000011750  | dykbindin             | dykbindin [Source:NCBI gene:Acc-101175565]                                                                 | 3.481437591  | 1.067221763  | 2.325158248  | 4.739857945 |
| ENSORLG00000004813  | AKT3                  | AK1 serine/threonine kinase 3 [Source:HGNC Symbol,Acc:HGNC:3893]                                           | 1.428806683  | -0.421838298 | 2.23409931   | 4.085228945 |
| ENSORLG00000010959  | -                     | -                                                                                                          | 2.37422303   | 1.26999012   | 2.304093162  | 3.412010786 |
| ENSORLG00000013178  | -                     | -                                                                                                          | 1.069319922  | -3.755262386 | -1.594942239 | 3.230128288 |
| ENSORLG00000006643  | slc12a5a              | solute carrier family 12 (potassium/chloride transporter), member 5a [Source:ZFIN,Acc:ZDB-GENE-120927-3]   | 1.596084282  | -0.599158767 | 1.140582171  | 3.33631063  |
| ENSORLG00000006737  | cyp21                 | cytochrome P450, family 2, subfamily R, polypeptide 1 [Source:ZFIN,Acc:ZDB-GENE-110114-1]                  | 2.520897864  | -1.240897159 | 1.236310945  | 4.998589963 |
| ENSORLG00000007398  | pp2z2ba               | protein phosphatase 2, regulatory subunit B, beta a [Source:ZFIN,Acc:ZDB-GENE-101026-5]                    | 2.399724354  | 1.232752003  | 2.480450799  | 3.647910691 |

|                     |                |                                                                                                                  |              |              |              |             |
|---------------------|----------------|------------------------------------------------------------------------------------------------------------------|--------------|--------------|--------------|-------------|
| ENSORLG00000009733  | rgn11          | regulator of G protein signaling 11 [Source:ZFIN;Acc:ZDB-GENE-080220-48]                                         | 3.635347953  | 2.425403686  | 2.017357908  | 3.227782668 |
| ENSORLG00000013678  | rdpor2         | rhodopsin receptor 2 [Source:ZFIN;Acc:ZDB-GENE-041210-60]                                                        | 2.853946413  | 0.815583115  | 1.531629203  | 3.570477486 |
| ENSORLG00000002068  | si.ch211-14507 | si.ch211-14507.3 [Source:ZFIN;Acc:ZDB-GENE-061207-6]                                                             | 8.955826273  | 4.564742808  | 2.29394788   | 6.685494901 |
| ENSORLG00000012280  | -              | -                                                                                                                | 1.183159003  | -0.178780585 | 1.922880009  | 3.285291369 |
| ENSORLG00000002388  | -              | -                                                                                                                | 0.965405877  | -4.69465389  | -0.873202562 | 4.787348689 |
| ENSORLG00000013991  | RAP1GAP        | RAP1 GTPase activating protein [Source:HGNC Symbol;Acc:HGNC:9858]                                                | 3.202083     | 1.8593034    | 2.518311115  | 3.861578646 |
| ENSORLG00000007741  | got1           | glutamic-oxaloacetic transaminase 1, soluble [Source:ZFIN;Acc:ZDB-GENE-040426-2003]                              | 1.005572665  | -0.800897464 | 2.494810111  | 4.301765532 |
| ENSORLG00000013110  | gpr7a          | growth arrest-specific 7a [Source:ZFIN;Acc:ZDB-GENE-130128-1]                                                    | 2.30288449   | -0.360127593 | 0.524857899  | 3.188355104 |
| ENSORLG00000008815  | setd9          | SET domain containing 9 [Source:NCBI gene;Acc:101164580]                                                         | 1.875290739  | 1.191809124  | 2.361969871  | 3.045936611 |
| ENSORLG00000000462  | -              | -                                                                                                                | 2.572734975  | 0.102087534  | 0.654029187  | 3.125161703 |
| ENSORLG00000007255  | lman2a         | lectin, mannose-binding 2-like a [Source:ZFIN;Acc:ZDB-GENE-040715-4]                                             | 1.807221964  | 0.128919517  | 1.393233157  | 3.072021254 |
| ENSORLG00000004826  | pros1          | protein S [Source:ZFIN;Acc:ZDB-GENE-061013-657]                                                                  | -0.223947724 | -3.470149937 | 0.24582025   | 3.49250778  |
| ENSORLG00000009031  | PAX3           | paired box 3 [Source:HGNC Symbol;Acc:HGNC:8617]                                                                  | 2.441601099  | -11.55178996 | 2.797042398  | 16.79049025 |
| ENSORLG00000004395  | rfap36         | ribA and flagella associated protein 36 [Source:ZFIN;Acc:ZDB-GENE-060421-8162]                                   | 1.207103087  | 0.057041299  | 2.690978401  | 3.841525295 |
| ENSORLG00000021781  | -              | -                                                                                                                | 2.074702671  | 0.643766257  | 1.611545516  | 3.042966626 |
| ENSORLG00000014869  | cyt2h13 (1 of  | cytochrome P450, family 2, subfamily N, polypeptide 13 [Source:ZFIN;Acc:ZDB-GENE-041001-158]                     | 2.012197323  | 0.6803419    | 1.895802351  | 3.228142679 |
| ENSORLG00000007832  | klf4           | IKAROS family zinc finger 4 [Source:ZFIN;Acc:ZDB-GENE-180319-1]                                                  | 4.700483621  | 2.269319074  | 2.301627827  | 4.733279206 |
| ENSORLG00000004527  | -              | -                                                                                                                | 1.155819167  | -0.836330068 | 1.976046702  | 3.768688859 |
| ENSORLG00000004052  | -              | -                                                                                                                | 2.910514997  | 0.374955977  | 0.478282638  | 3.014326621 |
| ENSORLG00000021688  | rf00409        | -                                                                                                                | 1.141367907  | -12.2245263  | 2.975643459  | 16.34208444 |
| ENSORLG00000000606  | RAB28          | RAB28, member RAS oncogene family [Source:NCBI gene;Acc:101166561]                                               | 2.79200953   | 0.9417344    | 2.971671621  | 4.822431701 |
| ENSORLG00000008899  | gfod2          | glucose-fructose oxidoreductase domain containing 2 [Source:ZFIN;Acc:ZDB-GENE-061103-64]                         | 2.288785652  | 0.679927941  | 1.408820523  | 3.018163161 |
| ENSORLG00000005222  | smap2          | small ARF47 [Source:ZFIN;Acc:ZDB-GENE-060503-374]                                                                | 4.740979087  | 3.246116881  | 1.587865997  | 3.083211032 |
| ENSORLG00000003222  | rfap57         | ribA and flagella associated protein 57 [Source:ZFIN;Acc:ZDB-GENE-110411-266]                                    | 5.781193249  | 1.824371758  | 2.982422469  | 6.939727494 |
| ENSORLG00000007349  | selu           | Oryzias latipes selenoprotein U (selu), mRNA [Source:RefSeq mRNA;Acc:NM_001193545]                               | 2.164214284  | -1.142686633 | -0.000163222 | 3.307222486 |
| ENSORLG000000007532 | vat1l          | vesicle amine transport 1 like [Source:NCBI gene;Acc:101162437]                                                  | 2.645862378  | 1.916396663  | 2.561336147  | 3.291281512 |
| ENSORLG00000002099  | RF00045        | small nucleolar RNA SNORA73 family [Source:NCBI gene;Acc:111947163]                                              | 15.09758199  | 12.96485345  | 1.161906461  | 3.05102241  |
| ENSORLG00000011211  | mett4          | methyltransferase like 4 [Source:ZFIN;Acc:ZDB-GENE-130129-2]                                                     | 1.027089915  | -1.075663752 | 0.962813389  | 3.066052023 |
| ENSORLG00000001729  | calm4a         | calmodulin-like 4a [Source:ZFIN;Acc:ZDB-GENE-081022-9]                                                           | 2.885806503  | -0.459665047 | 0.101144645  | 3.447101251 |
| ENSORLG000000014280 | ngy8tr         | neuropeptide Y receptor Y8b [Source:ZFIN;Acc:ZDB-GENE-980526-208]                                                | 2.583413502  | -1.484796747 | -0.066832539 | 4.001664183 |
| ENSORLG00000015367  | rbm41          | RNA binding motif protein 41 [Source:ZFIN;Acc:ZDB-GENE-041114-107]                                               | 2.297072363  | 0.049518913  | 1.07622796   | 3.324266238 |
| ENSORLG00000014632  | -              | -                                                                                                                | 2.110808076  | 0.537085171  | 1.450587444  | 3.024804692 |
| ENSORLG00000005090  | dennd4c        | DENND4D domain containing 4C [Source:ZFIN;Acc:ZDB-GENE-120727-13]                                                | 1.887260864  | 0.109280107  | 1.662228956  | 3.440694748 |
| ENSORLG00000018000  | atacyb         | ataxia cerebellar, Cayman type b [Source:ZFIN;Acc:ZDB-GENE-070912-200]                                           | 3.400816216  | 0.861066024  | 0.644911116  | 3.185145135 |
| ENSORLG00000011789  | mpg5b          | membrane palmitoylated protein 5 [Source:NCBI gene;Acc:101164939]                                                | 0.966478206  | -0.784382032 | 2.819447649  | 4.570792888 |
| ENSORLG00000015006  | cap89          | centrosomal protein 89 [Source:ZFIN;Acc:ZDB-GENE-040426-1210]                                                    | 3.209480888  | 1.046369935  | 1.24116133   | 3.404754534 |
| ENSORLG00000017726  | -              | -                                                                                                                | 1.741144308  | 0.122762811  | 2.293676897  | 3.912543436 |
| ENSORLG00000018117  | -              | -                                                                                                                | 2.560736883  | 0.719899817  | 1.585738119  | 3.4270599   |
| ENSORLG00000008648  | ft172          | intraflagellar transport 172 [Source:NCBI gene;Acc:101174877]                                                    | 2.242145642  | -0.172033673 | 1.055431049  | 3.470095154 |
| ENSORLG000000005140 | zgc138564      | chromosome 9 Cpor64 homolog [Source:NCBI gene;Acc:101169613]                                                     | -1.066782641 | -1.903125258 | 2.512000385  | 3.348888099 |
| ENSORLG00000009879  | trnm46a        | tripartite motif containing 46a [Source:ZFIN;Acc:ZDB-GENE-110825-1]                                              | 2.041944114  | -1.15725591  | 1.55729395   | 4.75697806  |
| ENSORLG00000014269  | porcn          | porcupine O-acyltransferase [Source:ZFIN;Acc:ZDB-GENE-081108-87]                                                 | 13.49693565  | 11.07352571  | 2.295472951  | 4.719405275 |
| ENSORLG00000006795  | -              | -                                                                                                                | 2.383758203  | 0.256001274  | 1.26938621   | 3.397528415 |
| ENSORLG00000014218  | maco1a         | macoalin-1 [Source:NCBI gene;Acc:101174517]                                                                      | 1.318424177  | -0.034018675 | 1.873003799  | 3.225931423 |
| ENSORLG00000009029  | -              | -                                                                                                                | 14.63172615  | 11.64354057  | 2.329814549  | 5.314469228 |
| ENSORLG00000017919  | e2f5           | E2F transcription factor 5 [Source:ZFIN;Acc:ZDB-GENE-030828-3]                                                   | 2.772556645  | 0.157719511  | 0.698465884  | 3.313787941 |
| ENSORLG00000014062  | slc22a16       | solute carrier family 22 (organic cation/carnitine transporter), member 16 [Source:ZFIN;Acc:ZDB-GENE-041001-166] | 1.266923416  | -0.277569079 | 2.490945587  | 4.03592306  |
| ENSORLG00000012060  | spata6l        | spermatogenesis associated 6-like [Source:ZFIN;Acc:ZDB-GENE-040426-1369]                                         | 13.86816085  | 11.63145902  | 2.794572705  | 5.021739192 |
| ENSORLG00000014512  | -              | -                                                                                                                | 14.20276438  | 11.40640699  | 2.296399135  | 5.095222028 |
| ENSORLG00000017845  | chrm5b         | cholinergic receptor, muscarinic 5b [Source:ZFIN;Acc:ZDB-GENE-041001-169]                                        | 4.786171629  | 2.266977056  | 0.626158777  | 3.145300324 |
| ENSORLG00000021729  | RF00231        | small Cajal body-specific RNA 13 [Source:NCBI gene;Acc:111947194]                                                | 1.082278042  | -0.758748597 | 1.576287992  | 3.417799689 |
| ENSORLG00000015575  | eml1           | ectoderm microtubule associated protein like 1 [Source:ZFIN;Acc:ZDB-GENE-060929-156]                             | 2.263729299  | 0.679257557  | 1.564999966  | 3.14994616  |
| ENSORLG00000015707  | -              | -                                                                                                                | 4.105824198  | 3.055208208  | 2.642469855  | 3.893568829 |
| ENSORLG00000005234  | carmsap1a      | calmodulin regulated spectrin-associated protein 1a [Source:ZFIN;Acc:ZDB-GENE-060518-4]                          | 2.527961512  | 0.85749717   | 2.444135504  | 4.115088661 |
| ENSORLG00000014929  | dnm2b          | dynamin 2b [Source:ZFIN;Acc:ZDB-GENE-040426-2371]                                                                | 2.578099873  | 0.122068834  | 0.577603432  | 3.054112507 |
| ENSORLG00000022969  | -              | -                                                                                                                | 1.503973824  | 0.169672638  | 2.097510237  | 3.432296381 |
| ENSORLG00000027885  | -              | -                                                                                                                | 4.281641067  | -8.548168865 | 2.491286586  | 15.0767996  |
| ENSORLG00000020281  | capn5a         | histone-lysine N-methyltransferase SETD1A-8 [Source:NCBI gene;Acc:101162613]                                     | 0.160732048  | -0.177884331 | 0.157869717  | 3.514888807 |
| ENSORLG00000001160  | -              | -                                                                                                                | 13.42331685  | 11.282295    | 2.342398468  | 4.483888488 |
| ENSORLG00000007181  | p14k2ab        | phosphatidylinositol-5-phosphate 4-kinase, type II, alpha b [Source:ZFIN;Acc:ZDB-GENE-070912-272]                | 1.718250311  | 0.659583909  | 2.29620071   | 3.355352022 |
| ENSORLG00000011674  | PLPFR1         | phospholipid phosphatase related 1 [Source:HGNC Symbol;Acc:HGNC:79993]                                           | 3.120829591  | 0.188378514  | 1.274097153  | 4.207032272 |
| ENSORLG00000015668  | -              | -                                                                                                                | 3.453238688  | 1.675362124  | 2.355939627  | 4.134315004 |
| ENSORLG00000021524  | RF00319        | small nucleolar RNA SNORA23 [Source:NCBI gene;Acc:111946815]                                                     | 2.481347869  | -0.787163013 | 1.892289301  | 5.161280454 |
| ENSORLG00000003277  | ankra2         | ankyrin repeat family A member 2 [Source:NCBI gene;Acc:101158120]                                                | 1.210863563  | -0.301625134 | 1.67339624   | 3.186396834 |
| ENSORLG00000004338  | wfhag2         | tyrosine 3-monooxygenase/tryptophan 5-monooxygenase activation protein gamma [Source:NCBI gene;Acc:101160253]    | 2.852693127  | 0.475617916  | 0.755613135  | 3.133172149 |
| ENSORLG00000000404  | -              | -                                                                                                                | 1.793733815  | 0.469522098  | 2.476477674  | 3.801178959 |
| ENSORLG00000001070  | slc38a3a       | solute carrier family 38, member 3a [Source:ZFIN;Acc:ZDB-GENE-070615-25]                                         | 14.95961169  | 10.57437592  | 1.661294229  | 6.047002731 |
| ENSORLG00000009199  | dnajp12b       | DnaJ heat shock protein family (Hsp40) member B12 [Source:NCBI gene;Acc:101160360]                               | 14.11549483  | 12.80688992  | 1.975220006  | 3.284291739 |
| ENSORLG00000017722  | -              | -                                                                                                                | 12.97924476  | 0            | 2.672724063  | 15.63246017 |

|                      |         |                                                                                                        |              |              |              |             |
|----------------------|---------|--------------------------------------------------------------------------------------------------------|--------------|--------------|--------------|-------------|
| ENSORLG00000002115   | -       | -                                                                                                      | 5.55355132   | 4.213332067  | 1.933990177  | 3.274508531 |
| ENSORLG00000001897   | -       | -                                                                                                      | 3.023202745  | 0.496804364  | 0.545268274  | 3.072152173 |
| ENSORLG00000005643   | klf4    | Kruppel-like factor 4 [Source:ZFIN;Acc:ZDB-GENE-1111014-11]                                            | 2.621013289  | -0.132406069 | 1.14906219   | 3.902966087 |
| ENSORLG000000011558  | -       | -                                                                                                      | 2.3964969    | 1.842374541  | 2.581107373  | 3.135715358 |
| ENSORLG00000006790   | spock2  | SPARC (osteonectin), ovov and kazal like domains proteoglycan 2 [Source:ZFIN;Acc:ZDB-GENE-090312-170]  | 1.9051475    | -0.948458889 | 1.495765476  | 4.349861693 |
| ENSORLG00000006677   | b4galt4 | beta-4-galactosyltransferase polypeptide 4 [Source:ZFIN;Acc:ZDB-GENE-0411114-004]                      | 2.607774517  | 0.979639009  | 2.684031245  | 4.312651772 |
| ENSORLG000000008530  | camkvl  | CaM kinase-like vesicle-associated, like [Source:ZFIN;Acc:ZDB-GENE-090311-58]                          | 14.73242874  | 12.44358852  | 1.081253306  | 3.370561539 |
| ENSORLG000000011245  | epb81a  | epb81-like 1a [Source:ZFIN;Acc:ZDB-GENE-050306-14]                                                     | 6.456052442  | 1.778003405  | 0.760607653  | 5.439119289 |
| ENSORLG000000010171  | trpc1   | transient receptor potential cation channel, subfamily C, member 1 [Source:ZFIN;Acc:ZDB-GENE-070830-1] | -0.674776901 | -2.514490055 | 2.618970691  | 4.45906294  |
| ENSORLG000000012843  | -       | -                                                                                                      | 0.772909858  | -0.415459713 | 2.070228993  | 3.258083495 |
| ENSORLG00000007936   | -       | -                                                                                                      | 2.027127517  | 0.832346138  | 2.588748647  | 3.784014826 |
| ENSORLG000000001255  | -       | -                                                                                                      | 2.445709951  | 0.166238688  | 2.518630919  | 4.798597106 |
| ENSORLG000000009203  | -       | -                                                                                                      | 3.830419877  | -0.838018027 | 1.4402013384 | 3.884438743 |
| ENSORLG00000007908   | -       | -                                                                                                      | 0.419773955  | -0.70466593  | 2.485585757  | 3.610510436 |
| ENSORLG000000007751  | acacb   | acetyl-CoA carboxylase beta [Source:ZFIN;Acc:ZDB-GENE-060526-132]                                      | 2.151306933  | 0.596848065  | 1.603228164  | 3.15817227  |
| ENSORLG0000000013163 | -       | -                                                                                                      | 3.168868744  | 0.163243052  | 1.460915899  | 4.465025971 |
| ENSORLG000000012824  | klhdc2  | kelch domain containing 2 [Source:ZFIN;Acc:ZDB-GENE-070410-69]                                         | 1.811449406  | -0.144402359 | 1.131236337  | 3.087573102 |
| ENSORLG00000000969   | adcy6b  | adenylylate cyclase B [Source:ZFIN;Acc:ZDB-GENE-090127-21]                                             | 3.029013452  | 1.267004359  | 2.191983924  | 3.954477806 |
| ENSORLG000000014319  | klh122  | kelch-like family member 22 [Source:ZFIN;Acc:ZDB-GENE-081104-154]                                      | 2.458892587  | 0.592293624  | 1.795380524  | 3.662464538 |
| ENSORLG000000009064  | -       | -                                                                                                      | 2.506591621  | 1.185204572  | 2.202695787  | 3.523569900 |
| ENSORLG000000016845  | wdr26b  | WD repeat domain 26b [Source:ZFIN;Acc:ZDB-GENE-041014-277]                                             | 1.894004789  | 0.08623983   | 1.571106158  | 3.379355914 |
| ENSORLG000000003896  | brpf3a  | bromodomain and PHD finger containing, 3a [Source:ZFIN;Acc:ZDB-GENE-130530-730]                        | 1.85609726   | -0.112759879 | 1.289512157  | 3.258853984 |
| ENSORLG000000004490  | vgl14b  | vestibular-like family member 4b [Source:ZFIN;Acc:ZDB-GENE-040406-2443]                                | 2.871547411  | -0.226487882 | -0.057031009 | 3.041489263 |
| ENSORLG000000015817  | rtm1a   | reticulon 1 [Source:NCBI;Gene:Acc:101155557]                                                           | 2.768196371  | 0.619749901  | 1.997917555  | 4.146848926 |
| ENSORLG000000016230  | cipca   | CLOCK-interacting pacemaker a [Source:ZFIN;Acc:ZDB-GENE-120509-3]                                      | 2.072938155  | -0.192021755 | 1.856273227  | 4.121718001 |
| ENSORLG000000018008  | tube1   | tubulin eselon 1 [Source:NCBI;Gene:Acc:105357241]                                                      | -0.297772637 | -0.742920146 | 2.790949469  | 3.23658227  |
| ENSORLG000000000342  | flr     | fler [Source:ZFIN;Acc:ZDB-GENE-070117-2066]                                                            | 1.116766201  | -0.551672773 | 1.533809365  | 3.202733275 |
| ENSORLG000000011665  | scot8   | acyl-CoA thioesterase 8 [Source:ZFIN;Acc:ZDB-GENE-041010-174]                                          | 2.947690981  | 0.059010127  | 0.172796252  | 3.061962023 |

Table S2. The details of relative RNA expressions quantified by mean TPMs

| gene           | RNA-seq MeanTPM |             |             |            |            |            |            |            |             |           |           |            |
|----------------|-----------------|-------------|-------------|------------|------------|------------|------------|------------|-------------|-----------|-----------|------------|
|                | WTO             | WTO         | averageWTO  | HmO        | HmO        | averageHmO | HmT        | HmT        | averageHmT  | WTT       | WTT       | averageWTT |
| <i>dynll2</i>  | 1654.542847     | 1654.522705 | 1654.532776 | 2491.56982 | 2491.61157 | 2491.5907  | 216.537933 | 216.612503 | 216.575218  | 21.138573 | 21.138496 | 21.1385345 |
| <i>nanos3</i>  | 74.249474       | 74.248573   | 74.2490235  | 75.266609  | 75.267868  | 75.2672385 | 3.006331   | 3.007367   | 3.006849    | 8.113937  | 8.113908  | 8.1139225  |
| <i>igf2bp3</i> | 106.600914      | 106.599617  | 106.6002655 | 96.797195  | 96.798828  | 96.7980115 | 6.987148   | 6.989555   | 6.9883515   | 10.473875 | 10.473838 | 10.4738565 |
| <i>sycp1</i>   | 0.987137        | 0.987125    | 0.987131    | 19.553797  | 19.554125  | 19.553961  | 341.741211 | 341.858887 | 341.800049  | 0.087868  | 0.087868  | 0.087868   |
| <i>sycp3</i>   | 3.209434        | 3.209395    | 3.2094145   | 13.548008  | 13.548236  | 13.548122  | 1195.81384 | 1196.22559 | 1196.01971  | 36.060265 | 36.060135 | 36.0602    |
| <i>sycp3l</i>  | 0.836214        | 0.836204    | 0.836209    | 6.428904   | 6.429011   | 6.4289575  | 692.36145  | 692.599915 | 692.4806825 | 75.624466 | 75.624199 | 75.6243325 |
| <i>dnaaf1</i>  | 0.591493        | 0.591485    | 0.591489    | 0.908715   | 0.908731   | 0.908723   | 214.024719 | 214.098434 | 214.061577  | 5.136553  | 5.136535  | 5.136544   |
| <i>fkbp7</i>   | 0.85495         | 0.854939    | 0.8549445   | 7.868912   | 7.869044   | 7.868978   | 100.362503 | 100.397072 | 100.3797875 | 11.918123 | 11.91808  | 11.9181015 |
| <i>smc1b</i>   | 1.148499        | 1.148485    | 1.148492    | 4.136409   | 4.136478   | 4.1364435  | 400.527679 | 400.665619 | 400.596649  | 73.833267 | 73.833    | 73.8331335 |
| <i>nanos2</i>  | 0.0001          | 0.0001      | 0.0001      | 0.0001     | 0.0001     | 0.0001     | 16.289652  | 16.295261  | 16.2924565  | 13.118932 | 13.118885 | 13.1189085 |

| MeanTPM        | WTO         | HmO         | HmT         | WTT        |
|----------------|-------------|-------------|-------------|------------|
| <i>dynll2</i>  | 1654.532776 | 2491.590698 | 216.575218  | 21.1385345 |
| <i>nanos3</i>  | 74.2490235  | 75.2672385  | 3.006849    | 8.1139225  |
| <i>igf2bp3</i> | 106.6002655 | 96.7980115  | 6.9883515   | 10.4738565 |
| <i>sycp1</i>   | 0.987131    | 19.553961   | 341.800049  | 0.087868   |
| <i>sycp3</i>   | 3.2094145   | 13.548122   | 1196.019715 | 36.0602    |
| <i>sycp3l</i>  | 0.836209    | 6.4289575   | 692.4806825 | 75.6243325 |
| <i>dnaaf1</i>  | 0.591489    | 0.908723    | 214.0615765 | 5.136544   |
| <i>fkbp7</i>   | 0.8549445   | 7.868978    | 100.3797875 | 11.9181015 |
| <i>smc1b</i>   | 1.148492    | 4.1364435   | 400.596649  | 73.8331335 |
| <i>nanos2</i>  | 0.0001      | 0.0001      | 16.2924565  | 13.1189085 |

| log2MeanTPM    | WTO          | HmO          | HmT         | WTT          |
|----------------|--------------|--------------|-------------|--------------|
| <i>dynll2</i>  | 10.69220816  | 11.28285138  | 7.758724359 | 4.401803455  |
| <i>nanos3</i>  | 6.214300147  | 6.233950136  | 1.588252419 | 3.020399523  |
| <i>igf2bp3</i> | 6.736067221  | 6.596905506  | 2.804952175 | 3.388720839  |
| <i>sycp1</i>   | -0.018686541 | 4.289388975  | 8.417008794 | -3.508518333 |
| <i>sycp3</i>   | 1.682310128  | 3.760020978  | 10.22402545 | 5.172335493  |
| <i>sycp3l</i>  | -0.258064524 | 2.684584814  | 9.435630016 | 6.240778598  |
| <i>dnaaf1</i>  | -0.75757676  | -0.1380875   | 7.741882049 | 2.360798003  |
| <i>fkbp7</i>   | -0.226097327 | 2.976176275  | 6.649324987 | 3.575082534  |
| <i>smc1b</i>   | 0.199740807  | 2.048390876  | 8.646006543 | 6.206196483  |
| <i>nanos2</i>  | -13.28771238 | -13.28771238 | 4.026132238 | 3.713575787  |

**Table S3. Rawdata of real-time qPCR quantification**

| <i>fshr-qfw1 qrv2</i> |    |         |                |            |                                  |         |         |         |
|-----------------------|----|---------|----------------|------------|----------------------------------|---------|---------|---------|
| Descriptives          |    |         |                |            | Multiple Comparisons             |         |         |         |
| tissue                |    |         |                |            | 95% Confidence Interval for Mean |         | Minimum | Maximum |
|                       | N  | Mean    | Std. Deviation | Std. Error | Bound                            | Bound   |         |         |
| WTO                   | 3  | 0.8993  | 0.09425        | 0.05442    | 0.6652                           | 1.1334  | 0.81    | 1.00    |
| WTT                   | 3  | 13.0541 | 0.55760        | 0.32193    | 11.6690                          | 14.4393 | 12.50   | 13.61   |
| HmO                   | 3  | 2.2024  | 0.33668        | 0.19438    | 1.3660                           | 3.0387  | 1.83    | 2.48    |
| HmT                   | 3  | 17.8113 | 3.44067        | 1.98647    | 9.2642                           | 26.3585 | 14.49   | 21.36   |
| Total                 | 12 | 8.4918  | 7.62268        | 2.20048    | 3.6486                           | 13.3350 | 0.81    | 21.36   |

  

| Multiple Comparisons                    |           |           |                       |            |       |                         |          |
|-----------------------------------------|-----------|-----------|-----------------------|------------|-------|-------------------------|----------|
| Dependent Variable: Relative expression |           |           |                       |            |       |                         |          |
|                                         | (I)tissue | (J)tissue | Mean Difference (I-J) | Std. Error | Sig.  | 95% Confidence Interval |          |
|                                         |           |           |                       |            |       | Bound                   | Bound    |
| LSD                                     | WTO       | WTT       | -12.15481*            | 1.43012    | 0.000 | -15.4527                | -8.8570  |
|                                         |           | HmO       | -1.30306              | 1.43012    | 0.389 | -4.6009                 | 1.9948   |
|                                         |           | HmT       | -16.91203*            | 1.43012    | 0.000 | -20.2099                | -13.6142 |
|                                         | WTT       | WTO       | 12.15481*             | 1.43012    | 0.000 | 8.8570                  | 15.4527  |
|                                         |           | HmO       | 10.85175*             | 1.43012    | 0.000 | 7.5539                  | 14.1496  |
|                                         |           | HmT       | -4.75722*             | 1.43012    | 0.010 | -8.0551                 | -1.4594  |
|                                         | HmO       | WTO       | 1.30306               | 1.43012    | 0.389 | -1.9948                 | 4.6009   |
|                                         |           | WTT       | -10.85175*            | 1.43012    | 0.000 | -14.1496                | -7.5539  |
|                                         |           | HmT       | -15.60897*            | 1.43012    | 0.000 | -18.9068                | -12.3111 |
|                                         | HmT       | WTO       | 16.91203*             | 1.43012    | 0.000 | 13.6142                 | 20.2099  |
|                                         |           | WTT       | 4.75722*              | 1.43012    | 0.010 | 1.4594                  | 8.0551   |
|                                         |           | HmO       | 15.60897*             | 1.43012    | 0.000 | 12.3111                 | 18.9068  |

\*. The mean difference is significant at the 0.05 level.

| <i>mIR202 -Fw1 RV2</i> |    |        |                |            |                                  |        |         |         |
|------------------------|----|--------|----------------|------------|----------------------------------|--------|---------|---------|
| Descriptives           |    |        |                |            | Multiple Comparisons             |        |         |         |
| tissue                 |    |        |                |            | 95% Confidence Interval for Mean |        | Minimum | Maximum |
|                        | N  | Mean   | Std. Deviation | Std. Error | Bound                            | Bound  |         |         |
| WTO                    | 3  | 0.0150 | 0.00095        | 0.00055    | 0.0126                           | 0.0173 | 0.01    | 0.02    |
| WTT                    | 3  | 0.9469 | 0.06631        | 0.03828    | 0.7822                           | 1.1117 | 0.87    | 1.00    |
| HmO                    | 3  | 0.0138 | 0.00031        | 0.00018    | 0.0130                           | 0.0145 | 0.01    | 0.01    |
| HmT                    | 3  | 1.2402 | 0.11681        | 0.06744    | 0.9500                           | 1.5303 | 1.11    | 1.32    |
| Total                  | 12 | 0.5540 | 0.57674        | 0.16649    | 0.1875                           | 0.9204 | 0.01    | 1.32    |

  

| Multiple Comparisons                    |           |           |                       |            |       |                         |         |
|-----------------------------------------|-----------|-----------|-----------------------|------------|-------|-------------------------|---------|
| Dependent Variable: Relative expression |           |           |                       |            |       |                         |         |
|                                         | (I)tissue | (J)tissue | Mean Difference (I-J) | Std. Error | Sig.  | 95% Confidence Interval |         |
|                                         |           |           |                       |            |       | Bound                   | Bound   |
| LSD                                     | WTO       | WTT       | -.93197*              | 0.05484    | 0.000 | -1.0584                 | -0.8055 |
|                                         |           | HmO       | 0.00120               | 0.05484    | 0.983 | -0.1253                 | 0.1277  |
|                                         |           | HmT       | -1.22520*             | 0.05484    | 0.000 | -1.3517                 | -1.0987 |
|                                         | WTT       | WTO       | .93197*               | 0.05484    | 0.000 | 0.8055                  | 1.0584  |
|                                         |           | HmO       | .93317*               | 0.05484    | 0.000 | 0.8067                  | 1.0596  |
|                                         |           | HmT       | -.29323*              | 0.05484    | 0.001 | -0.4197                 | -0.1668 |
|                                         | HmO       | WTO       | -0.00120              | 0.05484    | 0.983 | -0.1277                 | 0.1253  |
|                                         |           | WTT       | -.93317*              | 0.05484    | 0.000 | -1.0596                 | -0.8067 |
|                                         |           | HmT       | -1.22640*             | 0.05484    | 0.000 | -1.3529                 | -1.0999 |
|                                         | HmT       | WTO       | 1.22520*              | 0.05484    | 0.000 | 1.0987                  | 1.3517  |
|                                         |           | WTT       | .29323*               | 0.05484    | 0.001 | 0.1668                  | 0.4197  |
|                                         |           | HmO       | 1.22640*              | 0.05484    | 0.000 | 1.0999                  | 1.3529  |

\*. The mean difference is significant at the 0.05 level.

| <i>mIR202-Fw1 RV3</i> |   |      |                |            |                                  |       |         |         |
|-----------------------|---|------|----------------|------------|----------------------------------|-------|---------|---------|
| Descriptives          |   |      |                |            | Multiple Comparisons             |       |         |         |
| tissue                |   |      |                |            | 95% Confidence Interval for Mean |       | Minimum | Maximum |
|                       | N | Mean | Std. Deviation | Std. Error | Bound                            | Bound |         |         |

  

| Multiple Comparisons                    |           |           |                       |            |      |                         |       |
|-----------------------------------------|-----------|-----------|-----------------------|------------|------|-------------------------|-------|
| Dependent Variable: Relative expression |           |           |                       |            |      |                         |       |
|                                         | (I)tissue | (J)tissue | Mean Difference (I-J) | Std. Error | Sig. | 95% Confidence Interval |       |
|                                         |           |           |                       |            |      | Bound                   | Bound |

|       | N  | Mean     | Std. Deviation | Std. Error | 95% Confidence Interval for Mean |          | Minimum | Maximum |
|-------|----|----------|----------------|------------|----------------------------------|----------|---------|---------|
|       |    |          |                |            | Bound                            | Bound    |         |         |
| WTO   | 3  | 0.9928   | 0.01877        | 0.01084    | 0.9462                           | 1.0395   | 0.97    | 1.01    |
| WTT   | 3  | 91.8090  | 8.89793        | 5.13722    | 69.7053                          | 113.9126 | 83.96   | 101.48  |
| HmO   | 3  | 1.2960   | 0.09214        | 0.05320    | 1.0671                           | 1.5249   | 1.23    | 1.40    |
| HmT   | 3  | 128.9333 | 16.18183       | 9.34258    | 88.7354                          | 169.1312 | 112.21  | 144.51  |
| Total | 12 | 55.7578  | 59.19227       | 17.08734   | 18.1488                          | 93.3668  | 0.97    | 144.51  |

|     | (I)tissue | (J)tissue | Mean Difference (I-J)   | Std. Error | Sig.  | 95% Confidence Interval |           |
|-----|-----------|-----------|-------------------------|------------|-------|-------------------------|-----------|
|     |           |           |                         |            |       | Bound                   | Bound     |
| LSD | WTO       | WTT       | -90.81612 <sup>*</sup>  | 7.53916    | 0.000 | -108.2015               | -73.4308  |
|     |           | HmO       | -0.30315                | 7.53916    | 0.969 | -17.6885                | 17.0822   |
|     |           | HmT       | -127.94051 <sup>*</sup> | 7.53916    | 0.000 | -145.3258               | -110.5552 |
|     |           | WTT       | 90.81612 <sup>*</sup>   | 7.53916    | 0.000 | 73.4308                 | 108.2015  |
|     |           | HmO       | 90.51297 <sup>*</sup>   | 7.53916    | 0.000 | 73.1276                 | 107.8983  |
|     |           | HmT       | -37.12438 <sup>*</sup>  | 7.53916    | 0.001 | -54.5097                | -19.7390  |
|     | HmO       | WTO       | 0.30315                 | 7.53916    | 0.969 | -17.0822                | 17.6885   |
|     |           | WTT       | -90.51297 <sup>*</sup>  | 7.53916    | 0.000 | -107.8983               | -73.1276  |
|     |           | HmT       | -127.63736 <sup>*</sup> | 7.53916    | 0.000 | -145.0227               | -110.2520 |
|     |           | WTO       | 127.94051 <sup>*</sup>  | 7.53916    | 0.000 | 110.5552                | 145.3258  |
|     |           | WTT       | 37.12438 <sup>*</sup>   | 7.53916    | 0.001 | 19.7390                 | 54.5097   |
|     |           | HmO       | 127.63736 <sup>*</sup>  | 7.53916    | 0.000 | 110.2520                | 145.0227  |

\*. The mean difference is significant at the 0.05 level.

### sycp1-qfw1 qrv2

| Descriptives |    |          |                |            |                                  |          |         |         |
|--------------|----|----------|----------------|------------|----------------------------------|----------|---------|---------|
| tissue       | N  | Mean     | Std. Deviation | Std. Error | 95% Confidence Interval for Mean |          | Minimum | Maximum |
|              |    |          |                |            | Bound                            | Bound    |         |         |
| WTO          | 3  | 1.0584   | 0.21097        | 0.12180    | 0.5343                           | 1.5824   | 0.88    | 1.29    |
| WTT          | 3  | 102.5576 | 15.21259       | 8.78299    | 64.7674                          | 140.3477 | 89.88   | 119.43  |
| HmO          | 3  | 1.1831   | 0.08517        | 0.04917    | 0.9715                           | 1.3947   | 1.09    | 1.25    |
| HmT          | 3  | 146.4302 | 27.73978       | 16.01557   | 77.5207                          | 215.3396 | 119.43  | 174.85  |
| Total        | 12 | 62.8073  | 67.79111       | 19.56961   | 19.7349                          | 105.8797 | 0.88    | 174.85  |

| Multiple Comparisons |           |           |                         |            |       |                         |           |
|----------------------|-----------|-----------|-------------------------|------------|-------|-------------------------|-----------|
| Dependent Variable:  |           |           |                         |            |       |                         |           |
|                      | (I)tissue | (J)tissue | Mean Difference (I-J)   | Std. Error | Sig.  | 95% Confidence Interval |           |
|                      |           |           |                         |            |       | Bound                   | Bound     |
| LSD                  | WTO       | WTT       | -101.49922 <sup>*</sup> | 12.91620   | 0.000 | -131.2840               | -71.7144  |
|                      |           | HmO       | -0.12473                | 12.91620   | 0.993 | -29.9096                | 29.6601   |
|                      |           | HmT       | -145.37182 <sup>*</sup> | 12.91620   | 0.000 | -175.1566               | -115.5870 |
|                      |           | WTT       | 101.49922 <sup>*</sup>  | 12.91620   | 0.000 | 71.7144                 | 131.2840  |
|                      |           | HmO       | 101.37448 <sup>*</sup>  | 12.91620   | 0.000 | 71.5897                 | 131.1593  |
|                      |           | HmT       | -43.87260 <sup>*</sup>  | 12.91620   | 0.009 | -73.6574                | -14.0878  |
|                      | HmO       | WTO       | 0.12473                 | 12.91620   | 0.993 | -29.6601                | 29.9096   |
|                      |           | WTT       | -101.37448 <sup>*</sup> | 12.91620   | 0.000 | -131.1593               | -71.5897  |
|                      |           | HmT       | -145.24708 <sup>*</sup> | 12.91620   | 0.000 | -175.0319               | -115.4623 |
|                      |           | WTO       | 145.37182 <sup>*</sup>  | 12.91620   | 0.000 | 115.5870                | 175.1566  |
|                      |           | WTT       | 43.87260 <sup>*</sup>   | 12.91620   | 0.009 | 14.0878                 | 73.6574   |
|                      |           | HmO       | 145.24708 <sup>*</sup>  | 12.91620   | 0.000 | 115.4623                | 175.0319  |

\*. The mean difference is significant at the 0.05 level.

### sycp3-qfw1 qrv2

| Descriptives |   |          |                |            |                                  |          |         |         |
|--------------|---|----------|----------------|------------|----------------------------------|----------|---------|---------|
| tissue       | N | Mean     | Std. Deviation | Std. Error | 95% Confidence Interval for Mean |          | Minimum | Maximum |
|              |   |          |                |            | Bound                            | Bound    |         |         |
| WTO          | 3 | 0.9828   | 0.05599        | 0.03233    | 0.8437                           | 1.1219   | 0.92    | 1.03    |
| WTT          | 3 | 183.9994 | 15.61559       | 9.01567    | 145.2081                         | 222.7907 | 166.57  | 196.72  |

| Multiple Comparisons |           |           |                         |            |       |                         |           |
|----------------------|-----------|-----------|-------------------------|------------|-------|-------------------------|-----------|
| Dependent Variable:  |           |           |                         |            |       |                         |           |
|                      | (I)tissue | (J)tissue | Mean Difference (I-J)   | Std. Error | Sig.  | 95% Confidence Interval |           |
|                      |           |           |                         |            |       | Bound                   | Bound     |
| LSD                  | WTO       | WTT       | -183.01665 <sup>*</sup> | 15.65159   | 0.000 | -219.1093               | -146.9240 |
|                      |           | HmO       | 0.02461                 | 15.65159   | 0.999 | -36.0680                | 36.1172   |

|       |    |          |           |          |          |          |        |        |
|-------|----|----------|-----------|----------|----------|----------|--------|--------|
| HmO   | 3  | 0.9582   | 0.17357   | 0.10021  | 0.5270   | 1.3893   | 0.84   | 1.16   |
| HmT   | 3  | 251.7009 | 35.01362  | 20.21512 | 164.7223 | 338.6796 | 229.13 | 292.04 |
| Total | 12 | 109.4103 | 117.13447 | 33.81381 | 34.9866  | 183.8340 | 0.84   | 292.04 |

|  |     |     |             |          |       |           |           |
|--|-----|-----|-------------|----------|-------|-----------|-----------|
|  |     | HmT | -250.71816* | 15.65159 | 0.000 | -286.8108 | -214.6255 |
|  | WTT | WTO | 183.01665*  | 15.65159 | 0.000 | 146.9240  | 219.1093  |
|  |     | HmO | 183.04125*  | 15.65159 | 0.000 | 146.9486  | 219.1339  |
|  |     | HmT | -67.70151*  | 15.65159 | 0.003 | -103.7941 | -31.6089  |
|  | HmO | WTO | -0.02461    | 15.65159 | 0.999 | -36.1172  | 36.0680   |
|  |     | WTT | -183.04125* | 15.65159 | 0.000 | -219.1339 | -146.9486 |
|  |     | HmT | -250.74277* | 15.65159 | 0.000 | -286.8354 | -214.6501 |
|  | HmT | WTO | 250.71816*  | 15.65159 | 0.000 | 214.6255  | 286.8108  |
|  |     | WTT | 67.70151*   | 15.65159 | 0.003 | 31.6089   | 103.7941  |
|  |     | HmO | 250.74277*  | 15.65159 | 0.000 | 214.6501  | 286.8354  |

\*. The mean difference is significant at the 0.05 level.

**dynll2-qfw3 qrv4**

| Descriptives |    |        |                |            |                                  |        |         |         |
|--------------|----|--------|----------------|------------|----------------------------------|--------|---------|---------|
| tissue       |    |        |                |            |                                  |        |         |         |
|              | N  | Mean   | Std. Deviation | Std. Error | 95% Confidence Interval for Mean |        | Minimum | Maximum |
|              |    |        |                |            | Bound                            | Bound  |         |         |
| WTO          | 3  | 1.0237 | 0.02972        | 0.01716    | 0.9498                           | 1.0975 | 1.00    | 1.06    |
| WTT          | 3  | 0.1027 | 0.00321        | 0.00185    | 0.0948                           | 0.1107 | 0.10    | 0.11    |
| HmO          | 3  | 0.7307 | 0.02557        | 0.01476    | 0.6671                           | 0.7942 | 0.71    | 0.76    |
| HmT          | 3  | 0.3223 | 0.02637        | 0.01522    | 0.2568                           | 0.3878 | 0.30    | 0.35    |
| Total        | 12 | 0.5448 | 0.37304        | 0.10769    | 0.3078                           | 0.7819 | 0.10    | 1.06    |

| Multiple Comparisons |           |           |                       |            |       |                         |         |
|----------------------|-----------|-----------|-----------------------|------------|-------|-------------------------|---------|
| Dependent Variable:  |           |           |                       |            |       |                         |         |
|                      | (I)tissue | (J)tissue | Mean Difference (I-J) | Std. Error | Sig.  | 95% Confidence Interval |         |
|                      |           |           |                       |            |       | Bound                   | Bound   |
| LSD                  | WTO       | WTT       | .92091*               | 0.01933    | 0.000 | 0.8763                  | 0.9655  |
|                      |           | HmO       | .29301*               | 0.01933    | 0.000 | 0.2484                  | 0.3376  |
|                      |           | HmT       | .70135*               | 0.01933    | 0.000 | 0.6568                  | 0.7459  |
|                      | WTT       | WTO       | -.92091*              | 0.01933    | 0.000 | -0.9655                 | -0.8763 |
|                      |           | HmO       | -.62791*              | 0.01933    | 0.000 | -0.6725                 | -0.5833 |
|                      |           | HmT       | -.21956*              | 0.01933    | 0.000 | -0.2641                 | -0.1750 |
|                      | HmO       | WTO       | -.29301*              | 0.01933    | 0.000 | -0.3376                 | -0.2484 |
|                      |           | WTT       | .62791*               | 0.01933    | 0.000 | 0.5833                  | 0.6725  |
|                      |           | HmT       | .40834*               | 0.01933    | 0.000 | 0.3638                  | 0.4529  |
|                      | HmT       | WTO       | -.70135*              | 0.01933    | 0.000 | -0.7459                 | -0.6568 |
|                      |           | WTT       | .21956*               | 0.01933    | 0.000 | 0.1750                  | 0.2641  |
|                      |           | HmO       | -.40834*              | 0.01933    | 0.000 | -0.4529                 | -0.3638 |

\*. The mean difference is significant at the 0.05 level.

**nanos2-fw3 rv4**

| Descriptives |    |        |                |            |                                  |        |         |         |
|--------------|----|--------|----------------|------------|----------------------------------|--------|---------|---------|
| tissue       |    |        |                |            |                                  |        |         |         |
|              | N  | Mean   | Std. Deviation | Std. Error | 95% Confidence Interval for Mean |        | Minimum | Maximum |
|              |    |        |                |            | Bound                            | Bound  |         |         |
| WTT          | 3  | 1.0406 | 0.03965        | 0.02289    | 0.9421                           | 1.1391 | 1.00    | 1.08    |
| WTO          | 3  | 0.0609 | 0.01440        | 0.00831    | 0.0251                           | 0.0966 | 0.05    | 0.07    |
| HmT          | 3  | 5.2188 | 0.14736        | 0.08508    | 4.8527                           | 5.5848 | 5.13    | 5.39    |
| HmO          | 2  | 0.0153 | 0.00516        | 0.00365    | -0.0310                          | 0.0617 | 0.01    | 0.02    |
| Total        | 11 | 1.7265 | 2.28530        | 0.68904    | 0.1912                           | 3.2618 | 0.01    | 5.39    |

| Multiple Comparisons |           |           |                       |            |       |                         |         |
|----------------------|-----------|-----------|-----------------------|------------|-------|-------------------------|---------|
| Dependent Variable:  |           |           |                       |            |       |                         |         |
|                      | (I)tissue | (J)tissue | Mean Difference (I-J) | Std. Error | Sig.  | 95% Confidence Interval |         |
|                      |           |           |                       |            |       | Bound                   | Bound   |
| LSD                  | WTT       | WTO       | .97971*               | 0.06691    | 0.000 | 0.8215                  | 1.1379  |
|                      |           | HmT       | -4.17822*             | 0.06691    | 0.000 | -4.3364                 | -4.0200 |
|                      |           | HmO       | 1.02524*              | 0.07481    | 0.000 | 0.8483                  | 1.2021  |
|                      | WTO       | WTT       | -.97971*              | 0.06691    | 0.000 | -1.1379                 | -0.8215 |
|                      |           | HmT       | -5.15793*             | 0.06691    | 0.000 | -5.3162                 | -4.9997 |
|                      |           | HmO       | 0.04552581            | 0.07481    | 0.562 | -0.1314                 | 0.2224  |
|                      | HmT       | WTT       | 4.17822*              | 0.06691    | 0.000 | 4.0200                  | 4.3364  |
|                      |           | WTO       | 5.15793*              | 0.06691    | 0.000 | 4.9997                  | 5.3162  |

|                                                          |     |     |            |         |       |         |         |
|----------------------------------------------------------|-----|-----|------------|---------|-------|---------|---------|
|                                                          |     | HmO | 5.20346*   | 0.07481 | 0.000 | 5.0266  | 5.3804  |
|                                                          | HmO | WTT | -1.02524*  | 0.07481 | 0.000 | -1.2021 | -0.8483 |
|                                                          |     | WTO | -0.0455258 | 0.07481 | 0.562 | -0.2224 | 0.1314  |
|                                                          |     | HmT | -5.20346*  | 0.07481 | 0.000 | -5.3804 | -5.0266 |
| *. The mean difference is significant at the 0.05 level. |     |     |            |         |       |         |         |

**nanos3 -Fw Rv**

| Descriptives |    |         |                |            |                                  |         |         |         |
|--------------|----|---------|----------------|------------|----------------------------------|---------|---------|---------|
| tissue       |    |         |                |            |                                  |         |         |         |
|              | N  | Mean    | Std. Deviation | Std. Error | 95% Confidence Interval for Mean |         | Minimum | Maximum |
|              |    |         |                |            | Bound                            | Bound   |         |         |
| WTT          | 3  | 0.8084  | 0.16853        | 0.09730    | 0.3898                           | 1.2271  | 0.68    | 1.00    |
| WTO          | 3  | 8.7765  | 0.77311        | 0.44635    | 6.8560                           | 10.6970 | 8.17    | 9.65    |
| HmT          | 3  | 2.8339  | 1.15698        | 0.66798    | -0.0402                          | 5.7080  | 2.16    | 4.17    |
| HmO          | 3  | 13.3003 | 0.14105        | 0.08144    | 12.9499                          | 13.6507 | 13.18   | 13.45   |
| Total        | 12 | 6.4298  | 5.18470        | 1.49669    | 3.1356                           | 9.7240  | 0.68    | 13.45   |

| Multiple Comparisons                                     |           |           |                       |            |       |                         |          |
|----------------------------------------------------------|-----------|-----------|-----------------------|------------|-------|-------------------------|----------|
| Dependent Variable:                                      |           |           |                       |            |       |                         |          |
|                                                          | (I)tissue | (J)tissue | Mean Difference (I-J) | Std. Error | Sig.  | 95% Confidence Interval |          |
|                                                          |           |           |                       |            |       | Bound                   | Bound    |
| LSD                                                      | WTT       | WTO       | -7.96808*             | 0.57512    | 0.000 | -9.2943                 | -6.6418  |
|                                                          |           | HmT       | -2.02550*             | 0.57512    | 0.008 | -3.3517                 | -0.6993  |
|                                                          |           | HmO       | -12.49188*            | 0.57512    | 0.000 | -13.8181                | -11.1656 |
|                                                          | WTO       | WTT       | 7.96808*              | 0.57512    | 0.000 | 6.6418                  | 9.2943   |
|                                                          |           | HmT       | 5.94258*              | 0.57512    | 0.000 | 4.6163                  | 7.2688   |
|                                                          |           | HmO       | -4.52380*             | 0.57512    | 0.000 | -5.8500                 | -3.1976  |
|                                                          | HmT       | WTT       | 2.02550*              | 0.57512    | 0.008 | 0.6993                  | 3.3517   |
|                                                          |           | WTO       | -5.94258*             | 0.57512    | 0.000 | -7.2688                 | -4.6163  |
|                                                          |           | HmO       | -10.46637*            | 0.57512    | 0.000 | -11.7926                | -9.1401  |
|                                                          | HmO       | WTT       | 12.49188*             | 0.57512    | 0.000 | 11.1656                 | 13.8181  |
|                                                          |           | WTO       | 4.52380*              | 0.57512    | 0.000 | 3.1976                  | 5.8500   |
|                                                          |           | HmT       | 10.46637*             | 0.57512    | 0.000 | 9.1401                  | 11.7926  |
| *. The mean difference is significant at the 0.05 level. |           |           |                       |            |       |                         |          |

**Table S4. Primer sets for RT PCR and real-time PCR analysis**

| qPCR Primer name            | primer (5'-3')           | bases | Size(bp)    |
|-----------------------------|--------------------------|-------|-------------|
| <i>fshr</i> qfw1            | CCGAGAAGCAGATCAAAGTG     | 20    | 244         |
| <i>fshr</i> qrv2            | TGGAGCGACTGCCTAGCAATAC   | 22    |             |
| <i>miR202</i> Fw1           | CAGACAGGTGAGTCCTCTTC     | 20    | 284         |
| <i>miR202</i> RV2           | CATGTCAAAGAAGTATATGC     | 20    |             |
| <i>miR202</i> Fw1           | CAGACAGGTGAGTCCTCTTC     | 20    | 491         |
| <i>miR202</i> RV3           | GCCTGAAGATTTAACTGATTC    | 21    |             |
| <i>sycp3</i> qfw1           | CCATGGCCAGAGGAAGAAGACAAC | 24    | 226         |
| <i>sycp3</i> qrv2           | CATCTCCTCCATGTTCTTCACA   | 22    |             |
| <i>sycp1</i> qfw1           | CATTCCAGGGTCACCTGAG      | 19    | 303         |
| <i>sycp1</i> qrv2           | CAAAGTGCAGTTCTTGAAT      | 18    |             |
| <i>dynll2</i> qfw3          | GCATATGTCAAGAAGGAAT      | 19    | 257         |
| <i>dynll2</i> qrv4          | GTGCAACACTACCATCATGA     | 20    |             |
| ola <i>sycp3-hdac8</i> fw1  | ccagtggagaaggtggacag     | 20    | As variants |
| ola <i>sycp3</i> exonVI Rv2 | gtagtttcttctgcagcgtggcc  | 23    |             |
| <i>nanos2</i> fw3           | ATGGCCTCGGTGCAAACAACCTG  | 22    | 215         |
| <i>nanos2</i> rv4           | CTGCTGACGGAGCTCGTCTCTG   | 22    |             |
| <i>nanos3</i> Fw            | ATGTCAGACGTGGAGTCTG      | 19    | 190         |
| <i>nanos3</i> Rv            | GCATGTCTCTGTTCAAGTC      | 19    |             |
| <i>actin</i> R              | CCTCCAATCCAGACAGAGTATT   | 22    | 733         |
| <i>actin</i> F              | TTCAACAGCCCTGCCATGTAC    | 21    |             |
| <i>Actin</i> QF             | GTGCTGTCTTTCCCTCCATC     | 20    | 168         |
| <i>Actin</i> QR             | TCTCCATGTATCCCAAGTTG     | 20    |             |

Table S5. Functional annotation and clustering of enriched KEGG pathways responsive to Gsdf signaling

| KEGG_up                               |                                 |           |          |             |          |          |              |       |              |  |
|---------------------------------------|---------------------------------|-----------|----------|-------------|----------|----------|--------------|-------|--------------|--|
| ID                                    | Description                     | GeneRatio | BgRatio  | pvalue      | p.adjust | qvalue   | geneID       | Count | Rich.factor  |  |
| ola03440                              | Homologous recombination        | 2/9       | 40/6707  | 0.001216018 | 0.017024 | 0.01408  | sycp3/sycp3l | 2     | 37.261111111 |  |
| ola03320                              | PPAR signaling pathway          | 2/9       | 83/6707  | 0.005148573 | 0.03604  | 0.029808 | fabp7a/fads2 | 2     | 17.95716198  |  |
| ola00592                              | alpha-Linolenic acid metabolis  | 1/9       | 26/6707  | 0.034372981 | 0.160407 | 0.132668 | fads2        | 1     | 28.66239316  |  |
| ola01040                              | Biosynthesis of unsaturated fat | 1/9       | 43/6707  | 0.056275817 | 0.196965 | 0.162904 | fads2        | 1     | 17.33074935  |  |
| ola00240                              | Pyrimidine metabolism           | 1/9       | 67/6707  | 0.086445596 | 0.202413 | 0.167409 | nme3         | 1     | 11.12271973  |  |
| ola00983                              | Drug metabolism - other enzy    | 1/9       | 69/6707  | 0.088920606 | 0.202413 | 0.167409 | nme3         | 1     | 10.80032206  |  |
| ola01212                              | Fatty acid metabolism           | 1/9       | 79/6707  | 0.10120648  | 0.202413 | 0.167409 | fads2        | 1     | 9.433192686  |  |
| ola04260                              | Cardiac muscle contraction      | 1/9       | 132/6707 | 0.163896159 | 0.262716 | 0.217284 | atp1a3b      | 1     | 5.645622896  |  |
| ola00230                              | Purine metabolism               | 1/9       | 166/6707 | 0.202035859 | 0.262716 | 0.217284 | nme3         | 1     | 4.489290495  |  |
| ola01240                              | Biosynthesis of cofactors       | 1/9       | 167/6707 | 0.203133807 | 0.262716 | 0.217284 | nme3         | 1     | 4.462408516  |  |
| ola04217                              | Necroptosis                     | 1/9       | 170/6707 | 0.206419598 | 0.262716 | 0.217284 | chmp6a       | 1     | 4.383660131  |  |
| ola04261                              | Adrenergic signaling in cardior | 1/9       | 227/6707 | 0.266603952 | 0.311038 | 0.257249 | atp1a3b      | 1     | 3.282917279  |  |
| ola04144                              | Endocytosis                     | 1/9       | 340/6707 | 0.374057698 | 0.382856 | 0.316648 | chmp6a       | 1     | 2.191830065  |  |
| ola04020                              | Calcium signaling pathway       | 1/9       | 350/6707 | 0.382855745 | 0.382856 | 0.316648 | p2rx1        | 1     | 2.129206349  |  |
| remark: Rich factor=GeneRatio/BgRatio |                                 |           |          |             |          |          |              |       |              |  |

| KEGG_down                             |                                |           |          |             |          |          |                   |       |             |  |
|---------------------------------------|--------------------------------|-----------|----------|-------------|----------|----------|-------------------|-------|-------------|--|
| ID                                    | Description                    | GeneRatio | BgRatio  | pvalue      | p.adjust | qvalue   | geneID            | Count | Rich.factor |  |
| ola00561                              | Glycerolipid metabolism        | 2/13      | 71/6707  | 0.007992756 | 0.14387  | 0.134615 | plpp4/dgat2       | 2     | 14.53304442 |  |
| ola04512                              | ECM-receptor interaction       | 2/13      | 107/6707 | 0.017537304 | 0.157836 | 0.147683 | frem1b/lamb3      | 2     | 9.643421999 |  |
| ola00515                              | Mannose type O-glycan biosyn   | 1/13      | 28/6707  | 0.052979059 | 0.181999 | 0.170292 | fut4              | 1     | 18.42582418 |  |
| ola00790                              | Folate biosynthesis            | 1/13      | 29/6707  | 0.05482234  | 0.181999 | 0.170292 | tph1a             | 1     | 17.79045093 |  |
| ola00601                              | Glycosphingolipid biosynthesis | 1/13      | 35/6707  | 0.065812657 | 0.181999 | 0.170292 | fut4              | 1     | 14.74065934 |  |
| ola04514                              | Cell adhesion molecules        | 2/13      | 224/6707 | 0.068000063 | 0.181999 | 0.170292 | cldn15a/claudin-3 | 2     | 4.606456044 |  |
| ola04530                              | Tight junction                 | 2/13      | 256/6707 | 0.085832789 | 0.181999 | 0.170292 | cldn15a/claudin-3 | 2     | 4.030649038 |  |
| ola02010                              | ABC transporters               | 1/13      | 48/6707  | 0.089221523 | 0.181999 | 0.170292 | abcc12            | 1     | 10.74839744 |  |
| ola00380                              | Tryptophan metabolism          | 1/13      | 49/6707  | 0.090999586 | 0.181999 | 0.170292 | tph1a             | 1     | 10.52904239 |  |
| ola00480                              | Glutathione metabolism         | 1/13      | 74/6707  | 0.134423285 | 0.241962 | 0.226397 | anpepb            | 1     | 6.971933472 |  |
| ola00564                              | Glycerophospholipid metabolis  | 1/13      | 111/6707 | 0.195186363 | 0.319396 | 0.29885  | plpp4             | 1     | 4.647955648 |  |
| ola04145                              | Phagosome                      | 1/13      | 167/6707 | 0.279699671 | 0.364423 | 0.34098  | ctsl.1            | 1     | 3.089359742 |  |
| ola04142                              | Lysosome                       | 1/13      | 170/6707 | 0.283987162 | 0.364423 | 0.34098  | ctsl.1            | 1     | 3.034841629 |  |
| ola04140                              | Autophagy - animal             | 1/13      | 184/6707 | 0.30368574  | 0.364423 | 0.34098  | ctsl.1            | 1     | 2.803929766 |  |
| ola04210                              | Apoptosis                      | 1/13      | 184/6707 | 0.30368574  | 0.364423 | 0.34098  | ctsl.1            | 1     | 2.803929766 |  |
| ola04510                              | Focal adhesion                 | 1/13      | 269/6707 | 0.412938829 | 0.464556 | 0.434672 | lamb3             | 1     | 1.917929654 |  |
| ola04144                              | Endocytosis                    | 1/13      | 340/6707 | 0.491822991 | 0.502111 | 0.469812 | dab2              | 1     | 1.517420814 |  |
| ola04020                              | Calcium signaling pathway      | 1/13      | 350/6707 | 0.502111228 | 0.502111 | 0.469812 | ntrk3b            | 1     | 1.474065934 |  |
| remark: Rich factor=GeneRatio/BgRatio |                                |           |          |             |          |          |                   |       |             |  |





**Table S6.** The proportion of Spg2a and Spg2b among the entire EdU positive spermatogonia of normal and *gsdf*-deficient XY testes

| EdU+<br>Germ cells | normal testes ( <i>gsdf</i> <sup>+/+</sup> XY) |       |       | Gsdf-deficient testes ( <i>gsdf</i> <sup>-/-</sup> XY) |       |       |
|--------------------|------------------------------------------------|-------|-------|--------------------------------------------------------|-------|-------|
|                    | No. 1                                          | No. 2 | No. 3 | No. 4                                                  | No. 5 | No. 6 |
| SpgB               | 32                                             | 37    | 10    | 35                                                     | 55    | 36    |
| SpgB2a             | 3                                              | 4     | 1     | 7                                                      | 7     | 9     |
| SpgB2b             | 29                                             | 33    | 9     | 28                                                     | 48    | 27    |
| SpgB2a /SpgB       | 0.094                                          | 0.108 | 0.1   | 0.2                                                    | 0.127 | 0.25  |
| Average rate       | 10.06%                                         |       |       | 19.24%                                                 |       |       |
| SD                 | 0.00343                                        |       |       | 0.00379                                                |       |       |

Table S7 Specific antibodies for immunostaining and Western blot analysis

| <b>Antibody</b>             | <b>Animal</b> | <b>Company</b>    | <b>Antigen</b>                                                                                                         | <b>Dilution of working solution</b> | <b>Note</b> |
|-----------------------------|---------------|-------------------|------------------------------------------------------------------------------------------------------------------------|-------------------------------------|-------------|
| $\alpha$ -PIWIL1            | rabbit        | BBI Life Sciences | fusion protein of human PIWIL1                                                                                         | 1:1000                              | D221136     |
| $\alpha$ -Sycp3             | mouse         | Abcam             | Hamster COR1/SCP3 protein (expressed as 6x His fusion in bacteria and purified on a Talon under denaturing conditions) | 1:1000                              | Ab97672     |
| $\beta$ -actin (HRP-direct) | mouse         | MBL Co.Ltd        | $\beta$ -actin                                                                                                         | 1:10000                             | PM053-7     |
| $\alpha$ -rabbit IgG (HRP)  | goat          | Abcam             | (H+L Chains)(HRP)                                                                                                      | 1:1000                              | ab205718    |
| $\alpha$ -mouse IgG (HRP)   | goat          | Abcam             | (H+L Chains)(HRP)                                                                                                      | 1:1000                              | ab205719    |

Table S8. Proportional distribution of normal and *gsdf*<sup>-/-</sup> gonadal germ cells in prophase of meiosis

| stage<br>tissue | leptotene |         |     | zygotene |         |     | pachytene |         |     | M I phase |         |     |
|-----------------|-----------|---------|-----|----------|---------|-----|-----------|---------|-----|-----------|---------|-----|
|                 | number    | Average | STD | number   | Average | STD | number    | Average | STD | number    | Average | STD |
| WTT             | 32        | 33.4    | 4.1 | 18       | 18.0    | 2.0 | 25        | 24.0    | 2.6 | 24        | 20.7    | 3.1 |
| WTT             | 38        |         |     | 20       |         |     | 26        |         |     | 20        |         |     |
| WTT             | 30        |         |     | 16       |         |     | 21        |         |     | 18        |         |     |
| HmT             | 36        | 33.4    | 2.5 | 40       | 35.3    | 4.2 | 11        | 10.7    | 3.5 | 5         | 5.3     | 2.5 |
| HmT             | 33        |         |     | 32       |         |     | 14        |         |     | 8         |         |     |
| HmT             | 31        |         |     | 34       |         |     | 7         |         |     | 3         |         |     |
| WTO             | 22        | 19.0    | 3.0 | 40       | 40.7    | 3.1 | 27        | 23.7    | 3.1 | 5         | 5.3     | 1.5 |
| WTO             | 16        |         |     | 44       |         |     | 23        |         |     | 7         |         |     |
| WTO             | 19        |         |     | 38       |         |     | 21        |         |     | 4         |         |     |
| HmO             | 58        | 55.0    | 3.0 | 84       | 80.0    | 4.0 | 29        | 26.7    | 2.1 | 9         | 7.3     | 1.5 |
| HmO             | 52        |         |     | 80       |         |     | 25        |         |     | 7         |         |     |
| HmO             | 55        |         |     | 76       |         |     | 26        |         |     | 6         |         |     |

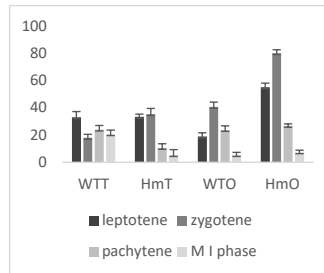

Supplement: Supplementary file 2 [file 74b09c4538c9f03b9fc12bfc.pdf]
