# Supplementary material for: RNA-seq and cytological study of sex-specific meiosis response to Gsdf in medaka (Oryzias latipes)
Source: Research Square preprint supplement (doi:10.21203/rs.3.rs-1433778/v1), 2022-03-21
Supplement: Supplementary file 1 [file 0677f0ead68531bbd228117f.pdf]

Table S1. The gene list of Venn diagrams from comparisons among different groups RNA-seq data

**log<sub>2</sub>FC ≥ 3 up**

| Names                                  | total | elements | gene name           | GeneDescription                                                                                             | log2FC-WTT vs WTO | log2FC-HmO vs WTO | log2FC-HmT vs WTT | log2FC-HmT vs HmO |
|----------------------------------------|-------|----------|---------------------|-------------------------------------------------------------------------------------------------------------|-------------------|-------------------|-------------------|-------------------|
| WTT vs WTO<br>HmO vs WTO<br>HmT vs WTT | 1     | 1        | ENSRORG00000015126  | kbp7<br>FK506 binding protein 7 [Source:ZFIN;Acc.ZDB-GENE-030616-182]                                       | 3.801173182       | 3.202270782       | 3.073996615       | 3.673385009       |
| WTT vs WTO<br>HmO vs WTO<br>HmT vs WTT | 4     | 4        | ENSRORG00000008272  | zcf4h2<br>zinc finger C4H2-type containing [Source:NCBI gene:Acc:101167375]                                 | 4.670202689       | 3.001939255       | 2.030345612       | 3.69909394        |
| WTT vs WTO<br>HmO vs WTO<br>HmT vs WTT | 30    | 30       | ENSRORG00000007203  | spag6<br>sperm associated antigen 6 [Source:NCBI gene:Acc:101168253]                                        | 3.401705543       | -0.612725443      | 3.952205055       | 7.967121187       |
| WTT vs WTO<br>HmO vs WTO<br>HmT vs WTT | 30    | 30       | ENSRORG00000001873  | dnaaf1<br>dynein, axonemal, assembly factor 1 [Source:ZFIN;Acc.ZDB-GENE-031114-4]                           | 3.118367531       | 0.619486311       | 5.380838146       | 7.880205233       |
| WTT vs WTO<br>HmO vs WTO<br>HmT vs WTT | 30    | 30       | ENSRORG000000013051 | enkur<br>enkurin, TRPC channel interacting protein [Source:NCBI gene:Acc:101169986]                         | 5.147001118       | -0.300681573      | 4.602585899       | 10.05075366       |
| WTT vs WTO<br>HmO vs WTO<br>HmT vs WTT | 30    | 30       | ENSRORG00000015746  | hormad1<br>HORMA domain containing 1 [Source:ZFIN;Acc.ZDB-GENE-040718-491]                                  | 5.361636592       | 2.275749753       | 3.641445334       | 6.727817892       |
| WTT vs WTO<br>HmO vs WTO<br>HmT vs WTT | 30    | 30       | ENSRORG000000021628 | mirna                                                                                                       | 3.94521362        | 2.620853084       | 3.227393539       | 4.552885377       |
| WTT vs WTO<br>HmO vs WTO<br>HmT vs WTT | 30    | 30       | ENSRORG00000016947  | kif17<br>kinesin family member 17 [Source:ZFIN;Acc.ZDB-GENE-080724-12]                                      | 3.062848579       | 0.805654694       | 3.03923322        | 5.29160389        |
| WTT vs WTO<br>HmO vs WTO<br>HmT vs WTT | 30    | 30       | ENSRORG00000014547  | anaaf4                                                                                                      | 17.24992933       | 11.53403533       | 4.719483148       | 10.43584441       |
| WTT vs WTO<br>HmO vs WTO<br>HmT vs WTT | 30    | 30       | ENSRORG00000003037  | TMEM184C (1)                                                                                                | 3.005338236       | 0.703607745       | 3.113399769       | 5.416156663       |
| WTT vs WTO<br>HmO vs WTO<br>HmT vs WTT | 30    | 30       | ENSRORG00000009617  | lysa3<br>Oryzias latipes synaptosomal complex protein 3 (scp3), mRNA. [Source:RefSeq mRNA:Acc.NM_001104712] | 3.490019201       | 2.077074777       | 5.051444209       | 6.464240648       |
| WTT vs WTO<br>HmO vs WTO<br>HmT vs WTT | 30    | 30       | ENSRORG00000001938  | armac3<br>armadillo repeat containing 3 [Source:ZFIN;Acc.ZDB-GENE-110614-11]                                | 5.918481962       | 1.37406167        | 4.187000867       | 8.731904075       |
| WTT vs WTO<br>HmO vs WTO<br>HmT vs WTT | 30    | 30       | ENSRORG00000005527  | -                                                                                                           | 5.181814499       | 1.785199432       | 3.857019304       | 7.254121033       |
| WTT vs WTO<br>HmO vs WTO<br>HmT vs WTT | 30    | 30       | ENSRORG00000008020  | ahf8b8<br>abhydrolase domain containing 8b [Source:ZFIN;Acc.ZDB-GENE-130530-805]                            | 4.64840339        | 0.320613244       | 4.243109818       | 8.571387196       |
| WTT vs WTO<br>HmO vs WTO<br>HmT vs WTT | 30    | 30       | ENSRORG000000013075 | -                                                                                                           | 5.356439968       | 1.725369874       | 4.034621771       | 7.666171712       |
| WTT vs WTO<br>HmO vs WTO<br>HmT vs WTT | 30    | 30       | ENSRORG000000013475 | fatp7a<br>fatty acid-binding protein, brain [Source:NCBI gene:Acc:101157499]                                | 3.384558086       | 2.317149192       | 3.747485373       | 4.815379449       |
| WTT vs WTO<br>HmO vs WTO<br>HmT vs WTT | 30    | 30       | ENSRORG000000014719 | -                                                                                                           | 16.55982607       | 10.53928485       | 3.390583379       | 9.411587133       |
| WTT vs WTO<br>HmO vs WTO<br>HmT vs WTT | 30    | 30       | ENSRORG00000012933  | -                                                                                                           | 3.028221324       | 0.178837866       | 3.774448009       | 6.627318723       |
| WTT vs WTO<br>HmO vs WTO<br>HmT vs WTT | 30    | 30       | ENSRORG000000004819 | MCMDC2<br>mitochondrial chromosome maintenance domain containing 2 [Source:NCBI gene:Acc:101171954]         | 4.038103443       | 0.802118521       | 3.974242655       | 7.210711371       |
| WTT vs WTO<br>HmO vs WTO<br>HmT vs WTT | 30    | 30       | ENSRORG000000017955 | -                                                                                                           | 15.69101174       | 11.16026853       | 4.837521021       | 9.368730495       |
| WTT vs WTO<br>HmO vs WTO<br>HmT vs WTT | 30    | 30       | ENSRORG000000011728 | rme3<br>NME/NUM2 nucleoside diphosphate kinase 3 [Source:NCBI gene:Acc:101158025]                           | 5.750428695       | 1.769297233       | 3.987446076       | 7.969600099       |
| WTT vs WTO<br>HmO vs WTO<br>HmT vs WTT | 30    | 30       | ENSRORG000000016898 | rsp9<br>radial spoke head 9 homolog [Source:ZFIN;Acc.ZDB-GENE-031120-129]                                   | 4.045387346       | 1.670919497       | 5.686946682       | 6.961902014       |
| WTT vs WTO<br>HmO vs WTO<br>HmT vs WTT | 30    | 30       | ENSRORG000000016753 | cfap206<br>cilia and flagella associated protein 206 [Source:ZFIN;Acc.ZDB-GENE-050922-460]                  | 4.142848029       | 1.090518303       | 4.0337407         | 7.086561898       |
| WTT vs WTO<br>HmO vs WTO<br>HmT vs WTT | 30    | 30       | ENSRORG000000021492 | RF00300<br>RNA component of mitochondrial RNA processing endonuclease [Source:HGNC Symbol:Acc:HGNC:10031]   | 4.70222248        | 3.411176536       | 3.743701416       | 5.052334551       |
| WTT vs WTO<br>HmO vs WTO<br>HmT vs WTT | 30    | 30       | ENSRORG00000006147  | lycp3l<br>-                                                                                                 | 6.498837043       | 2.942645958       | 3.194605537       | 6.152181581       |
| WTT vs WTO<br>HmO vs WTO<br>HmT vs WTT | 30    | 30       | ENSRORG00000006357  | -                                                                                                           | 3.291119015       | 0.991893353       | 3.182698389       | 5.482408425       |
| WTT vs WTO<br>HmO vs WTO<br>HmT vs WTT | 30    | 30       | ENSRORG00000001282  | -                                                                                                           | 4.213771834       | 0.030128782       | 3.758515446       | 7.94401172        |
| WTT vs WTO<br>HmO vs WTO<br>HmT vs WTT | 30    | 30       | ENSRORG00000009043  | tek2<br>tekin 2 (testicular) [Source:ZFIN;Acc.ZDB-GENE-040113-1]                                            | 15.69916683       | 0                 | 3.45752318        | 19.15718159       |
| WTT vs WTO<br>HmO vs WTO<br>HmT vs WTT | 30    | 30       | ENSRORG000000013191 | atp1a3b<br>ATPase Na+/K+ transporting subunit alpha 3b [Source:ZFIN;Acc.ZDB-GENE-001212-8]                  | 3.093073646       | 1.797872154       | 3.008363566       | 4.304050234       |
| WTT vs WTO<br>HmO vs WTO<br>HmT vs WTT | 30    | 30       | ENSRORG000000012392 | -                                                                                                           | 3.895912308       | -0.028241434      | 3.746739058       | 7.67137194        |
| WTT vs WTO<br>HmO vs WTO<br>HmT vs WTT | 30    | 30       | ENSRORG000000009736 | si.ch211-10a23.2<br>si.ch211-10a23.2 [Source:ZFIN;Acc.ZDB-GENE-090313-9]                                    | 3.146303838       | -1.252440945      | 5.05924959        | 4.98551284        |
| WTT vs WTO<br>HmO vs WTO<br>HmT vs WTT | 30    | 30       | ENSRORG000000013668 | -                                                                                                           | 3.414812292       | -0.940824723      | 4.899652536       | 9.255774646       |
| HmO vs WTO<br>HmT vs WTT               | 6     | 6        | ENSRORG000000011773 | g2rx1<br>purinergic receptor P2X, ligand-gated ion channel, 1 [Source:ZFIN;Acc.ZDB-GENE-030319-1]           | 3.10262546        | 3.797133995       | 4.908527298       | 4.21450558        |
| HmO vs WTO<br>HmT vs WTT               | 6     | 6        | ENSRORG00000006520  | lycp1<br>synaptosomal complex protein 1 [Source:ZFIN;Acc.ZDB-GENE-040110-8]                                 | -3.48940562       | 4.308072185       | 11.9257876        | 4.127856045       |
| HmO vs WTO<br>HmT vs WTT               | 6     | 6        | ENSRORG00000007440  | chmp6a<br>charged multivesicular body protein 6a [Source:ZFIN;Acc.ZDB-GENE-100812-5]                        | -5.257084553      | 3.537651066       | 11.82570973       | 3.037743296       |
| HmO vs WTO<br>HmT vs WTT               | 6     | 6        | ENSRORG00000007240  | sema7a<br>semaphorin 7A [Source:ZFIN;Acc.ZDB-GENE-030131-3633]                                              | 1.177530426       | 3.116252059       | 5.514952305       | 5.576714422       |
| HmO vs WTO<br>HmT vs WTT               | 6     | 6        | ENSRORG000000010797 | -                                                                                                           | 2.322935831       | 3.288275621       | 5.428895759       | 4.464040894       |
| HmO vs WTO<br>HmT vs WTT               | 6     | 6        | ENSRORG00000001409  | -                                                                                                           | -0.793799823      | 4.039038248       | 8.427469203       | 3.595114735       |
| HmO vs WTO<br>HmT vs WTT               | 6     | 6        | ENSRORG000000092323 | -                                                                                                           | 4.580801179       | 3.081195483       | -1.46654064       | -0.446548911      |
| HmO vs WTO<br>HmT vs WTT               | 6     | 6        | ENSRORG000000045818 | -                                                                                                           | 5.158711987       | 4.673083955       | 5.975702477       | 1.881684417       |
| HmO vs WTO<br>HmT vs WTT               | 6     | 6        | ENSRORG00000008275  | gls2b<br>GLS family zinc finger 2b [Source:ZFIN;Acc.ZDB-GENE-091204-120]                                    | 4.554374498       | 3.40222678        | -1.955998538      | -0.803556714      |
| HmO vs WTO<br>HmT vs WTT               | 6     | 6        | ENSRORG00000007164  | cdm15a<br>cdm15 [Source:NCBI gene:Acc:101168324]                                                            | 3.867797188       | 3.030980252       | -4.277702634      | -3.390375485      |
| HmO vs WTO<br>HmT vs WTT               | 6     | 6        | ENSRORG00000016486  | nrs1a<br>nuclear receptor subfamily 5 group A member 1 [Source:NCBI gene:Acc:100045260]                     | 5.535095217       | -0.793208992      | 1.632754445       | 1.632754445       |
| HmO vs WTO<br>HmT vs WTT               | 6     | 6        | ENSRORG000000016145 | tmem45a<br>transmembrane protein 45A [Source:NCBI gene:Acc:101171597]                                       | 6.109702883       | 3.430436209       | -1.751838184      | 0.928003373       |
| HmO vs WTO<br>HmT vs WTT               | 6     | 6        | ENSRORG00000009249  | -                                                                                                           | 4.765464582       | 3.081077362       | -1.792262926      | -0.10739668       |
| HmO vs WTO<br>HmT vs WTT               | 6     | 6        | ENSRORG000000050438 | zpc194189<br>zpc194189 [Source:ZFIN;Acc.ZDB-GENE-081022-71]                                                 | 3.430019852       | 3.115729604       | 0.94056127        | 1.253421511       |
| HmO vs WTO<br>HmT vs WTT               | 6     | 6        | ENSRORG000000061008 | cxorf5a<br>CXorf5 protein 5a [Source:ZFIN;Acc.ZDB-GENE-030131-3178]                                         | 3.366420691       | 3.170021278       | -0.976654125      | -0.779769456      |
| HmO vs WTO<br>HmT vs WTT               | 6     | 6        | ENSRORG00000007008  | csp1b<br>cystine and glycine-rich protein 1b [Source:ZFIN;Acc.ZDB-GENE-070112-252]                          | 4.580562905       | 3.037426078       | -0.226355733      | 1.319662117       |

**log<sub>2</sub>FC ≤ -3 down**

| Names                    | total | elements | gene name           | GeneDescription                                                                                                      | log2FC-WTT vs WTO | log2FC-HmO vs WTO | log2FC-HmT vs WTT | log2FC-HmT vs HmO |
|--------------------------|-------|----------|---------------------|----------------------------------------------------------------------------------------------------------------------|-------------------|-------------------|-------------------|-------------------|
| WTT vs WTO<br>HmO vs WTO | 16    | 16       | ENSRORG00000014606  | NTRK3<br>neurotrophic receptor tyrosine kinase 3 [Source:HGNC Symbol:Acc:HGNC:8033]                                  | -3.37668132       | -3.216840924      | 0.300574514       | 0.146019859       |
| WTT vs WTO<br>HmO vs WTO | 16    | 16       | ENSRORG00000016104  | -                                                                                                                    | -7.128524338      | -16.00404113      | -8.875534552      | 0                 |
| WTT vs WTO<br>HmO vs WTO | 16    | 16       | ENSRORG000000000570 | TNNI2 (1)<br>tropomyosin 1, fast skeletal muscle [Source:NCBI gene:Acc:101156490]                                    | -3.91062419       | -5.324663484      | -2.621071894      | -0.486985441      |
| WTT vs WTO<br>HmO vs WTO | 16    | 16       | ENSRORG00000001935  | sytr3<br>synaptotagmin III [Source:ZFIN;Acc.ZDB-GENE-090601-1]                                                       | -3.604557606      | -7.158526943      | -1.201389837      | 2.350635276       |
| WTT vs WTO<br>HmO vs WTO | 16    | 16       | ENSRORG000000013345 | plp4p<br>phospholipid phosphatase 4 [Source:ZFIN;Acc.ZDB-GENE-081107-53]                                             | -5.775132987      | -3.42178265       | 1.292340684       | -1.060524492      |
| WTT vs WTO<br>HmO vs WTO | 16    | 16       | ENSRORG000000012562 | -                                                                                                                    | -15.6313135       | -3.586601224      | 12.45774253       | 0.413518865       |
| WTT vs WTO<br>HmO vs WTO | 16    | 16       | ENSRORG000000013180 | hcn4<br>hyperpolarization activated cyclic nucleotide-gated potassium channel 4 [Source:ZFIN;Acc.ZDB-GENE-050206-38] | -5.520600743      | -3.609917053      | 2.25459279        | 0.344393394       |
| WTT vs WTO<br>HmO vs WTO | 16    | 16       | ENSRORG00000008586  | -                                                                                                                    | 6.153054236       | 7.094404599       | -0.985420187      | 0.043584266       |
| WTT vs WTO<br>HmO vs WTO | 16    | 16       | ENSRORG00000005962  | trh1a<br>tryptophan hydroxylase 1 (tryptophan 5-monoxygenase) [Source:ZFIN;Acc.ZDB-GENE-030317-11]                   | -5.318721649      | -5.266341765      | -1.00095381       | -1.052848972      |
| WTT vs WTO<br>HmO vs WTO | 16    | 16       | ENSRORG000000011011 | sidcyt-3d<br>dispatched RND transporter family member 3 [Source:HGNC Symbol:Acc:HGNC:29251]                          | -3.030521536      | 7.158455428       | -0.001544219      | 4.126900489       |
| WTT vs WTO<br>HmO vs WTO | 16    | 16       | ENSRORG000000018234 | -                                                                                                                    | -7.32900942       | -4.20353068       | -8.875534552      | 12.70009473       |
| WTT vs WTO<br>HmO vs WTO | 16    | 16       | ENSRORG00000003268  | cadm2b<br>cell adhesion molecule 2b [Source:ZFIN;Acc.ZDB-GENE-080506-3]                                              | -4.476828973      | -7.123990594      | -1.041316215      | 1.606329409       |
| WTT vs WTO<br>HmO vs WTO | 16    | 16       | ENSRORG00000004627  | -                                                                                                                    | -4.978265703      | -5.87256815       | 1.203839551       | 2.09862149        |
| WTT vs WTO<br>HmO vs WTO | 16    | 16       | ENSRORG000000012851 | -                                                                                                                    | -4.529760306      | -3.512269645      | -6.892096645      | -2.706210517      |
| WTT vs WTO<br>HmO vs WTO | 16    | 16       | ENSRORG00000004712  | gf2b23<br>cartilage intermediate layer protein 2 [Source:NCBI gene:Acc:101160704]                                    | -17.8933825       | -3.412911291      | 12.79861028       | -1.681470732      |
| WTT vs WTO<br>HmO vs WTO | 16    | 16       | ENSRORG000000006007 | sou5<br>insulin like growth factor 2 mRNA binding protein 3 [Source:NCBI gene:Acc:101156590]                         | -3.34732611       | -0.139165108      | -0.584014591      | -3.791717068      |
| WTT vs WTO<br>HmO vs WTO | 16    | 16       | ENSRORG000000050780 | sou5f<br>home-binding protein sou5f [Source:ZFIN;Acc.ZDB-GENE-110718-2]                                              | -4.101978636      | 3.324966349       | 2.239382023       | -5.187087109      |
| WTT vs WTO<br>HmO vs WTO | 16    | 16       | ENSRORG000000014006 | -                                                                                                                    | -6.035524557      | -0.422907397      | -3.775135553      | -9.387269669      |
| WTT vs WTO<br>HmO vs WTO | 16    | 16       | ENSRORG00000004261  | -                                                                                                                    | -9.959317565      | -0.596678364      | -0.240205179      | -9.602300028      |
| WTT vs WTO<br>HmO vs WTO | 16    | 16       | ENSRORG000000014984 | nol12<br>nucleolar protein 12 [Source:ZFIN;Acc.ZDB-GENE-040426-135]                                                  | -5.758764739      | -0.85705846       | 0.016121256       | -4.885119024      |
| WTT vs WTO<br>HmO vs WTO | 16    | 16       | ENSRORG000000011808 | acs15<br>acyl-CoA synthetase long chain family member 5 [Source:ZFIN;Acc.ZDB-GENE-040912-168]                        | -6.60350302       | 2.384954716       | 4.305279512       | -3.682691849      |
| WTT vs WTO<br>HmO vs WTO | 16    | 16       | ENSRORG00000000414  | -                                                                                                                    | -10.33132004      | -0.263845399      | 1.088052005       | 8.979547119       |
| WTT vs WTO<br>HmO vs WTO | 16    | 16       | ENSRORG000000009014 | -                                                                                                                    | -10.76704875      | -0.779749921      | -5.892513149      | -9.447560723      |
| WTT vs WTO<br>HmO vs WTO | 16    | 16       | ENSRORG000000012623 | serpina7<br>serine protease inhibitor A3N [Source:NCBI gene:Acc:101156256]                                           | -9.87030655       | 0.088659927       | -1.80016748       | -11.84132946      |
| WTT vs WTO<br>HmO vs WTO | 16    | 16       | ENSRORG000000012026 | -                                                                                                                    | -9.594825302      | -1.340873331      | 0.687474671       | -7.555991713      |
| WTT vs WTO<br>HmO vs WTO | 16    | 16       | ENSRORG000000002190 | hsd3b7<br>3 beta-hydroxysteroid dehydrogenase type 7 [Source:NCBI gene:Acc:101172816]                                | -3.904746749      | 0.703167331       | 0.006757968       | -4.600670936      |

|                           |                     |                     |                                                                                        |                                                                                                                       |             |              |              |             |
|---------------------------|---------------------|---------------------|----------------------------------------------------------------------------------------|-----------------------------------------------------------------------------------------------------------------------|-------------|--------------|--------------|-------------|
|                           | ENSORLG00000006626  | colgalt1            | collagen beta1-O-galactosyltransferase 1 [Source:ZFIN,Acc.ZDB:GENE-010720-6]           | 3.745018625                                                                                                           | 3.262852646 | 0.663240725  | 1.145892766  |             |
|                           | ENSORLG000000013447 | serpinf1            | serpin family F member 1 [Source:NCBI gene:Acc:101160187]                              | 4.912306731                                                                                                           | 3.796536828 | -1.18090841  | -0.064653555 |             |
|                           | ENSORLG000000014624 | angptl1a            | angiopoietin-like 1a [Source:ZFIN,Acc.ZDB:GENE-040724-269]                             | 3.560295457                                                                                                           | 3.024937164 | -0.85092516  | -0.315078264 |             |
|                           | ENSORLG000000017193 | ddr2l               | discoidin domain receptor family, member 2, like [Source:ZFIN,Acc.ZDB:GENE-041210-162] | 4.344688418                                                                                                           | 3.054914442 | -1.139688763 | 0.150770164  |             |
|                           | ENSORLG000000012932 | igfb9b              | immunoglobulin superfamily, member 9b [Source:ZFIN,Acc.ZDB:GENE-060810-28]             | 6.382557233                                                                                                           | 3.989783341 | -0.410483294 | 1.982774881  |             |
|                           | ENSORLG00000017301  | unm_sas2t1          | terastatinin-4 [Source:NCBI gene:Acc:101157219]                                        | 4.309331461                                                                                                           | 3.448627947 | -1.214688269 | -0.354879143 |             |
|                           | ENSORLG00000013074  | unm_sas2t1          | un-named sas2 [Source:ZFIN,Acc.ZDB:GENE-120727-16]                                     | 3.9631043                                                                                                             | 3.809150471 | -0.147461252 | 0.006980044  |             |
|                           | ENSORLG00000006002  | mpeg1.2             | macrophage expressed 1, tandem duplicate 2 [Source:ZFIN,Acc.ZDB:GENE-050522-305]       | 4.452615538                                                                                                           | 4.141305187 | -0.356965889 | -0.045173012 |             |
|                           | ENSORLG00000004846  | dnase2b             | deoxyribonuclease II beta [Source:ZFIN,Acc.ZDB:GENE-090824-2]                          | 3.675401599                                                                                                           | 3.133134863 | -0.488262893 | 0.054488891  |             |
|                           | ENSORLG00000006278  | s100a1              | S100 calcium binding protein A1 [Source:NCBI gene:Acc:101155142]                       | 4.19254494                                                                                                            | 4.174137923 | -0.10941416  | -0.090521211 |             |
|                           | ENSORLG00000006460  | s100a1              | S100 calcium binding protein A1 [Source:NCBI gene:Acc:101155142]                       | 3.824918491                                                                                                           | 3.231216824 | -0.86569191  | -0.26240545  |             |
|                           | ENSORLG00000007058  | anxa6               | annexin A6 [Source:NCBI gene:Acc:101156586]                                            | 4.105175152                                                                                                           | 3.703422815 | 0.044587711  | 0.44682556   |             |
|                           | ENSORLG00000005565  | bmpr1ba             | bone morphogenetic protein receptor type 1B [Source:NCBI gene:Acc:101171086]           | 3.90067193                                                                                                            | 3.637971359 | 1.175588209  | 1.438773478  |             |
|                           | ENSORLG00000008324  | zgc:172352          | nck-associated protein 1-like [Source:NCBI gene:Acc:101159814]                         | 3.223283729                                                                                                           | 3.204631127 | 0.953575787  | 0.972707489  |             |
|                           | ENSORLG00000005002  | ackr4b              | atypical chemokine receptor 4b [Source:ZFIN,Acc.ZDB:GENE-051107-10]                    | 3.712113041                                                                                                           | 3.218810188 | 0.052097993  | 0.545886094  |             |
|                           | ENSORLG000000010254 | ackr4b              | atypical chemokine receptor 4b [Source:ZFIN,Acc.ZDB:GENE-051107-10]                    | 3.004530137                                                                                                           | 3.144574051 | -0.565896916 | -0.705454963 |             |
|                           | ENSORLG00000002043  | ackr4b              | atypical chemokine receptor 4b [Source:ZFIN,Acc.ZDB:GENE-051107-10]                    | 4.285884495                                                                                                           | 3.031618328 | -1.170240815 | 0.084510185  |             |
|                           | ENSORLG00000011703  | ackr4b              | atypical chemokine receptor 4b [Source:ZFIN,Acc.ZDB:GENE-051107-10]                    | 3.748706433                                                                                                           | 3.151768938 | -0.116279398 | -0.420892999 |             |
|                           | ENSORLG000000015490 | kctd4               | potassium channel tetramerization domain containing 4 [Source:NCBI gene:Acc:101184501] | 5.500289208                                                                                                           | 6.118063842 | 2.456587776  | 1.89301238   |             |
|                           | ENSORLG000000013481 | erfs1               | immediate early response 5-like [Source:ZFIN,Acc.ZDB:GENE-020311-5134]                 | 5.599917505                                                                                                           | 3.455299644 | -0.163210056 | 1.98191522   |             |
|                           | ENSORLG00000002270  | si:skey-178a1.7     | si:skey-178a1.7 [Source:ZFIN,Acc.ZDB:GENE-081104-335]                                  | 5.001963571                                                                                                           | 3.065833103 | -1.300395401 | 0.636219833  |             |
|                           | ENSORLG00000002674  | zfn                 | zinc finger protein [Source:ZFIN,Acc.ZDB:GENE-040912-110]                              | 5.569741954                                                                                                           | 4.557056000 | 0.108013835  | 1.121192114  |             |
|                           | ENSORLG00000004473  | zfn                 | zinc finger protein [Source:ZFIN,Acc.ZDB:GENE-040912-110]                              | 4.929396939                                                                                                           | 3.290174931 | 0.181753387  | 1.881442427  |             |
|                           | ENSORLG000000016844 | zfn                 | zinc finger protein [Source:ZFIN,Acc.ZDB:GENE-040912-110]                              | 5.589262363                                                                                                           | 3.26963712  | -0.35440736  | 1.91601478   |             |
|                           | ENSORLG000000020228 | zfn                 | zinc finger protein [Source:ZFIN,Acc.ZDB:GENE-040912-110]                              | 4.362784547                                                                                                           | 3.800078539 | -0.930139638 | -0.366946933 |             |
|                           | ENSORLG00000002228  | zfn                 | zinc finger protein [Source:ZFIN,Acc.ZDB:GENE-040912-110]                              | 7.46092527                                                                                                            | 5.008896361 | -1.13424868  | 1.31838687   |             |
|                           | ENSORLG00000003041  | zfn                 | zinc finger protein [Source:ZFIN,Acc.ZDB:GENE-040912-110]                              | 4.485563887                                                                                                           | 4.33654841  | -0.140310077 | 1.00244542   |             |
|                           | ENSORLG00000002668  | zfn                 | zinc finger protein [Source:ZFIN,Acc.ZDB:GENE-040912-110]                              | 5.572424885                                                                                                           | 3.03447117  | 4.93587058   | -2.397436318 |             |
|                           | ENSORLG000000015826 | zfn                 | zinc finger protein [Source:ZFIN,Acc.ZDB:GENE-040912-110]                              | 6.505387739                                                                                                           | 4.201659903 | -1.409248361 | 0.894962352  |             |
|                           | ENSORLG00000002139  | zfn                 | zinc finger protein [Source:ZFIN,Acc.ZDB:GENE-040912-110]                              | 4.225939665                                                                                                           | 3.328211321 | -0.916178276 | -0.017966824 |             |
|                           | ENSORLG000000013415 | zfn                 | zinc finger protein [Source:ZFIN,Acc.ZDB:GENE-040912-110]                              | 5.991976986                                                                                                           | 4.615823048 | -0.897384126 | 0.489274302  |             |
|                           | ENSORLG000000009908 | zfn                 | zinc finger protein [Source:ZFIN,Acc.ZDB:GENE-040912-110]                              | 4.633354668                                                                                                           | 4.901017706 | 0.501445668  | 0.234267601  |             |
|                           | ENSORLG000000010534 | zfn                 | zinc finger protein [Source:ZFIN,Acc.ZDB:GENE-040912-110]                              | 3.232291343                                                                                                           | 3.082946568 | 0.04948792   | 0.199779177  |             |
|                           | ENSORLG000000009808 | zfn                 | zinc finger protein [Source:ZFIN,Acc.ZDB:GENE-040912-110]                              | 3.192811449                                                                                                           | 3.728882423 | 1.046918681  | 0.511533985  |             |
|                           | ENSORLG000000005483 | zfn                 | zinc finger protein [Source:ZFIN,Acc.ZDB:GENE-040912-110]                              | 3.378600906                                                                                                           | 3.131218331 | 1.074791733  | 0.122659586  |             |
|                           | ENSORLG000000009095 | zfn                 | zinc finger protein [Source:ZFIN,Acc.ZDB:GENE-040912-110]                              | 3.163302576                                                                                                           | 3.24047036  | 1.085841148  | 1.009157924  |             |
|                           | ENSORLG000000005483 | zfn                 | zinc finger protein [Source:ZFIN,Acc.ZDB:GENE-040912-110]                              | 4.076351308                                                                                                           | 3.328662898 | -0.157003943 | 0.529395781  |             |
|                           | ENSORLG000000017221 | zfn                 | zinc finger protein [Source:ZFIN,Acc.ZDB:GENE-040912-110]                              | 5.59426031                                                                                                            | 4.162842097 | -0.318620997 | 0.89445799   |             |
|                           | ENSORLG000000016332 | zfn                 | zinc finger protein [Source:ZFIN,Acc.ZDB:GENE-040912-110]                              | 4.487087377                                                                                                           | 3.53292322  | 0.478041659  | 1.412317982  |             |
|                           | ENSORLG00000002432  | zfn                 | zinc finger protein [Source:ZFIN,Acc.ZDB:GENE-040912-110]                              | 3.78589422                                                                                                            | 3.995471535 | -0.072409573 | -0.308806791 |             |
|                           | ENSORLG00000002102  | zfn                 | zinc finger protein [Source:ZFIN,Acc.ZDB:GENE-040912-110]                              | 6.233755506                                                                                                           | 6.470037049 | -0.233378454 | -0.469183417 |             |
|                           | ENSORLG000000013987 | zfn                 | zinc finger protein [Source:ZFIN,Acc.ZDB:GENE-040912-110]                              | 3.071497261                                                                                                           | 4.323353518 | 0.59760249   | -0.653789662 |             |
|                           | ENSORLG000000003310 | zfn                 | zinc finger protein [Source:ZFIN,Acc.ZDB:GENE-040912-110]                              | 7.728486009                                                                                                           | 3.826130661 | -1.815920941 | 2.069919601  |             |
| WTT VS WTO<br>HMT VS HMTc | 382                 | ENSORLG00000002103  | ch1                                                                                    | cofilin 1 [Source:NCBI gene:Acc:101173715]                                                                            | 4.195638742 | 0.934616169  | 0.750348152  | 4.011855596 |
|                           |                     | ENSORLG000000002035 | czncd3                                                                                 | cyclin D3 [Source:ZFIN,Acc.ZDB:GENE-041010-110]                                                                       | 3.290076829 | 1.156680513  | 1.289776812  | 3.423657784 |
|                           |                     | ENSORLG000000015810 | hh24a                                                                                  | hitch-hike family member 24 [Source:NCBI gene:Acc:101156920]                                                          | 4.822878581 | 1.665182985  | 0.333252751  | 3.491433659 |
|                           |                     | ENSORLG00000007494  | slc7a8a                                                                                | solute carrier family 7 (amino acid transporter light chain 1, system), member 8a [Source:ZFIN,Acc.ZDB:GENE-121120-2] | 4.656047    | 1.243791271  | -0.219053697 | 3.193687702 |
|                           |                     | ENSORLG000000006837 | unc                                                                                    | uncharacterized LOC101172640 [Source:NCBI gene:Acc:101172640]                                                         | 5.731809044 | 0.14318744   | -1.315140363 | 4.275279989 |
|                           |                     | ENSORLG00000004516  | DYNN1C1                                                                                | dynein cytoplasmic 1 intermediate chain 1 [Source:HGNC Symbol:Acc:HGNC:2963]                                          | 5.416735371 | 0.994368264  | 0.215755223  | 4.638699112 |
|                           |                     | ENSORLG00000005707  | prelid3a                                                                               | PREL1 domain containing 3A [Source:ZFIN,Acc.ZDB:GENE-120530-654]                                                      | 4.758728156 | 1.821237526  | 0.951363418  | 3.889338418 |
|                           |                     | ENSORLG000000014593 | anpepb                                                                                 | alanyl (membrane) aminopeptidase b [Source:ZFIN,Acc.ZDB:GENE-030131-1253]                                             | 4.805610066 | -4.168722323 | -5.58233721  | 3.392538533 |
|                           |                     | ENSORLG00000012691  | xgd                                                                                    | neuroglobin [Source:NCBI gene:Acc:101172860]                                                                          | 4.745511711 | 1.56607348   | 0.3388008    | 3.327191163 |
|                           |                     | ENSORLG000000017054 | nko3.3                                                                                 | NKX homeobox 3 [Source:ZFIN,Acc.ZDB:GENE-050306-27]                                                                   | 4.99533571  | 2.417644998  | 0.919002046  | 3.491713827 |
|                           |                     | ENSORLG000000007716 | zpc:32162                                                                              | zpc:32162 [Source:ZFIN,Acc.ZDB:GENE-040718-41]                                                                        | 7.801880415 | 3.709953765  | 1.215188895  | 5.300937369 |
|                           |                     | ENSORLG000000013055 | cry1                                                                                   | crystallin lambda 1 [Source:NCBI gene:Acc:101157739]                                                                  | 17.03811554 | 1.621517901  | 5.268287165  | 7.006292357 |
|                           |                     | ENSORLG000000012384 | inp4aa                                                                                 | inositol polyphosphate 4-phosphatase type 1Aa [Source:ZFIN,Acc.ZDB:GENE-060312-5]                                     | 3.09753812  | 1.90359093   | 2.200716254  | 3.395148652 |
|                           |                     | ENSORLG000000014023 | rtv1                                                                                   | DELTA-8000000-Hor4a [Source:NCBI gene:Acc:101155232]                                                                  | 4.294789863 | 0.306711782  | 0.510113714  | 4.498675752 |
|                           |                     | ENSORLG000000016618 | rab15                                                                                  | RAB15, member RAS oncogene family [Source:NCBI gene:Acc:101160374]                                                    | 5.543341965 | -0.540047394 | -2.487810539 | 3.596064188 |
|                           |                     | ENSORLG000000008629 | KNDC1                                                                                  | kinase non-catalytic C-lobe domain containing 1 [Source:HGNC Symbol:Acc:HGNC:29374]                                   | 4.539148576 | 0.554958555  | -0.486351559 | 3.496327279 |
|                           |                     | ENSORLG000000011524 | slan1a                                                                                 | SLAN motif family, member 1A [Source:ZFIN,Acc.ZDB:GENE-030131-1751]                                                   | 3.46962808  | 0.178627175  | 1.671580096  | 4.963070207 |
|                           |                     | ENSORLG000000011173 | RF0067                                                                                 | small nucleolar RNA SNORD15 [Source:NCBI gene:Acc:11948542]                                                           | 3.464233771 | 1.23059428   | 1.189676058  | 3.423801719 |
|                           |                     | ENSORLG000000011105 | RF0067                                                                                 | small nucleolar RNA SNORD15 [Source:NCBI gene:Acc:11948542]                                                           | 6.199684052 | -0.357304146 | -2.184601511 | 4.372869242 |
|                           |                     | ENSORLG000000011524 | RF0067                                                                                 | small nucleolar RNA SNORD15 [Source:NCBI gene:Acc:11948542]                                                           | 3.771821928 | -0.79904027  | -0.351779784 | 4.21956955  |
|                           |                     | ENSORLG000000011173 | RF0067                                                                                 | small nucleolar RNA SNORD15 [Source:NCBI gene:Acc:11948542]                                                           | 6.315783827 | 2.03824576   | -1.028010287 | 3.253006553 |
|                           |                     | ENSORLG000000011105 | RF0067                                                                                 | small nucleolar RNA SNORD15 [Source:NCBI gene:Acc:11948542]                                                           | 4.98024221  | 1.145527335  | 3.25201269   | 3.25201269  |

|  |                     |             |                                                                                                                            |   |   |              |              |              |              |
|--|---------------------|-------------|----------------------------------------------------------------------------------------------------------------------------|---|---|--------------|--------------|--------------|--------------|
|  | ENSORLG000000013640 | -           | uncharacterized LOC101174542 [Source:NCBI gene:Acc:101174542]                                                              | - | - | -21.58527381 | 0.844040035  | 0            | -27.42568084 |
|  | ENSORLG000000009100 | -           | cell death-inducing c53-target protein 1 [Source:NCBI gene:Acc:101167680]                                                  | - | - | -8.239827409 | 0.99610957   | 4.458462335  | -4.776988707 |
|  | ENSORLG000000000170 | -           | -                                                                                                                          | - | - | -4.14048938  | 0.345512436  | -0.157896243 | -4.643413638 |
|  | ENSORLG000000016838 | -           | -                                                                                                                          | - | - | -3.897887637 | -0.621853955 | -0.467765405 | -3.743314335 |
|  | ENSORLG000000015343 | slc7a6      | solute carrier family 7 (amino acid transporter light chain, lysyl system), member 6 [Source:ZFIN,Acc.ZDB:GENE-000607-211] | - | - | -7.976256403 | -0.735475826 | -0.0665339   | -7.30694927  |
|  | ENSORLG000000016451 | -           | -                                                                                                                          | - | - | -19.9570283  | 1.07547097   | 17.8696788   | 3.162905102  |
|  | ENSORLG000000015704 | -           | -                                                                                                                          | - | - | -18.04123926 | -0.227411347 | 13.87664246  | -3.934684136 |
|  | ENSORLG000000011390 | -           | -                                                                                                                          | - | - | -5.326446655 | -0.04366923  | 1.306865226  | -3.975451802 |
|  | ENSORLG000000012996 | sidkcypl-1b | si:skyp-17h1.4 [Source:ZFIN,Acc.ZDB:GENE-050208-18]                                                                        | - | - | -5.116109227 | 0.150826531  | -0.963226758 | -6.279228274 |
|  | ENSORLG000000000479 | -           | -                                                                                                                          | - | - | -3.674165341 | -0.636473602 | -2.295757238 | -5.333964076 |
|  | ENSORLG000000010924 | gtf2a1      | general transcription factor IIA, 1-like [Source:ZFIN,Acc.ZDB:GENE-060329-28]                                              | - | - | -0.405258778 | -1.00748365  | -0.178606576 | -3.755533956 |
|  | ENSORLG000000009822 | gpc3        | glypican 3 [Source:ZFIN,Acc.ZDB:GENE-031212-11]                                                                            | - | - | -3.182619467 | -0.296363514 | -0.793020037 | -3.678791    |
|  | ENSORLG000000013664 | fnsl1a      | fnsl1a [Source:ZFIN,Acc.ZDB:GENE-031009-1]                                                                                 | - | - | -3.580779276 | -0.295431017 | -1.635279331 | -4.930142631 |
|  | ENSORLG000000005824 | gnrh3       | Gonadotropin-releasing hormone 3, mRNA [Source:RefSeq mRNA:Acc:NM_001104672]                                               | - | - | -16.42658686 | 3.298120449  | 10.25296104  | -9.471256466 |
|  | ENSORLG000000006614 | -           | -                                                                                                                          | - | - | -10.73578175 | -0.39239789  | 2.157105336  | -8.18579271  |
|  | ENSORLG000000008830 | -           | -                                                                                                                          | - | - | -10.33278894 | 0.455950359  | -0.170718952 | -10.95887253 |
|  | ENSORLG000000013324 | -           | -                                                                                                                          | - | - | -9.91431089  | -0.549933217 | -0.444552117 | -9.088453389 |
|  | ENSORLG00000000290  | perilom-2   | perilom-2 [Source:NCBI gene:Acc:101167661]                                                                                 | - | - | -6.50391388  | 0.207553616  | 1.064905647  | -5.6926777   |
|  | ENSORLG000000017272 | oclnb       | occludin b [Source:ZFIN,Acc.ZDB:GENE-041212-43]                                                                            | - | - | -7.035408923 | -0.503678923 | 1.81226858   | -4.719515466 |
|  | ENSORLG000000006269 | YBX2        | Y-box binding protein 2 [Source:NCBI gene:Acc:100049372]                                                                   | - | - | -4.198005851 | -0.136937094 | -0.680888234 | -4.741472072 |
|  |                     |             |                                                                                                                            |   |   |              |              |              |              |

|                      |              |                                                                                                                                             |             |              |              |              |
|----------------------|--------------|---------------------------------------------------------------------------------------------------------------------------------------------|-------------|--------------|--------------|--------------|
| ENSORLG00000009257   | rlx2         | regulatory factor X 2 (influences HLA class II expression) [Source:ZFIN,Acc:ZDB-GENE-050277-4]                                              | 3.413115127 | 0.657091616  | 2.150464135  | 4.906971602  |
| ENSORLG00000002935   | -            | claudin 4, like [Source:NCBI, gene:Acc:101162388]                                                                                           | 4.860714048 | -2.111181268 | -2.120617441 | 4.851761887  |
| ENSORLG000000004184  | nbeal1       | neurobeachin-like 1 [Source:ZFIN,Acc:ZDB-GENE-130530_544]                                                                                   | 4.472222336 | 1.080626743  | 0.064442123  | 3.456524731  |
| ENSORLG000000003743  | pth1hb       | parathyroid hormone-like hormone b [Source:ZFIN,Acc:ZDB-GENE-110411_206]                                                                    | 5.970411747 | -9.668967195 | -0.486825584 | 16.121714    |
| ENSORLG000000002595  | -            | -                                                                                                                                           | 4.364194358 | 0.470667191  | 0.49102291   | 4.38032009   |
| ENSORLG000000012288  | dhd23a       | claudin 23a [Source:ZFIN,Acc:ZDB-GENE-091204_28]                                                                                            | 5.278625279 | -1.176318065 | -2.543297484 | 4.360312936  |
| ENSORLG000000001003  | smc1b        | structural maintenance of chromosomes 1B [Source:ZFIN,Acc:ZDB-GENE-091217-1]                                                                | 6.006449491 | 1.848646829  | 2.439562651  | 6.597851998  |
| ENSORLG000000004857  | -            | -                                                                                                                                           | 4.458064813 | 2.45091418   | 1.760995654  | 3.768453013  |
| ENSORLG00000004422   | col18a1a     | collagen type XVIII alpha 1 chain a [Source:ZFIN,Acc:ZDB-GENE-030516-3]                                                                     | 4.729891899 | 0.531094044  | -0.354219699 | 3.845063788  |
| ENSORLG00000006033   | gpcpds       | glyoxaldehyde 3- phosphate dehydrogenase 2 [Source:NCBI, gene:Acc:101167730]                                                                | 4.106804945 | 1.449390978  | 0.515220027  | 3.173118836  |
| ENSORLG000000001644  | pp1a3        | protein tyrosine phosphatase, receptor type, f polypeptide (PTFR), interacting protein (ripin), alpha 3 [Source:ZFIN,Acc:ZDB-GENE-100311-3] | 4.572778421 | 1.38739045   | 0.505213355  | 3.694683843  |
| ENSORLG000000007074  | ank54b       | ankyrin repeat and sterile alpha motif domain containing 4B [Source:ZFIN,Acc:ZDB-GENE-040704-29]                                            | 3.895238948 | -0.068839162 | -0.084096358 | 3.880466358  |
| ENSORLG000000005618  | -            | -                                                                                                                                           | 3.99660976  | 1.084004156  | 1.207444008  | 4.120607094  |
| ENSORLG000000013495  | -            | -                                                                                                                                           | 4.789529209 | 0.596273652  | 3.057049832  | -            |
| ENSORLG000000000227  | -            | keratin, type I cytoskeletal 20 [Source:NCBI, gene:Acc:101159508]                                                                           | 4.654698718 | -1.637043786 | -2.931008442 | 3.361218806  |
| ENSORLG000000011785  | -            | -                                                                                                                                           | 5.25450014  | 1.496436242  | 1.696369223  | 4.54492479   |
| ENSORLG000000017479  | patp4c       | pcy(A) binding protein, cytoplasmic 4 (inducible form) [Source:ZFIN,Acc:ZDB-GENE-030131_8663]                                               | 6.161232848 | 1.628489243  | -1.4894979   | 3.043728774  |
| ENSORLG000000011554  | spns3        | spinstar homolog 3 (Drosophila) [Source:ZFIN,Acc:ZDB-GENE-060531-7]                                                                         | 5.195054197 | 1.336677772  | -0.504045406 | 3.35265602   |
| ENSORLG000000000954  | -            | -                                                                                                                                           | 3.80531754  | 1.180178352  | 0.75543538   | 3.68610124   |
| ENSORLG000000014773  | dnm13ba      | DNA (cytosine-5)-methyltransferase 3 beta, duplicate a [Source:ZFIN,Acc:ZDB-GENE-050314-4]                                                  | 4.84038215  | 1.619332824  | 0.467512866  | 3.689046549  |
| ENSORLG000000009260  | rrm1         | ribonucleoside-diphosphate reductase large subunit [Source:NCBI, gene:Acc:101156188]                                                        | 4.257526199 | 1.821643175  | 1.525784142  | 3.962152122  |
| ENSORLG000000015259  | tcf3         | Oryzias latipes transcription factor 3 (tcf3), mRNA [Source:RefSeq mRNA,Acc:NM_00252422]                                                    | 4.978695142 | 2.348394123  | 0.520751792  | 3.151025352  |
| ENSORLG000000006596  | sidkey-38p12 | sidkey-38p12 3 [Source:ZFIN,Acc:ZDB-GENE-060810-103]                                                                                        | 6.465020091 | 1.860745953  | -0.819526958 | 5.368232652  |
| ENSORLG000000009373  | chr3l2       | chordin-like 2 [Source:ZFIN,Acc:ZDB-GENE-081104-3]                                                                                          | 4.01995699  | 0.527074076  | 1.434509765  | 4.927963822  |
| ENSORLG000000042768  | -            | -                                                                                                                                           | 3.985114875 | 0.430285713  | 0.301293151  | -            |
| ENSORLG000000014651  | -            | -                                                                                                                                           | 3.865325724 | -0.737911132 | 0.084438975  | 6.688186741  |
| ENSORLG000000004300  | LURAP1L      | leucine rich adaptor protein 1 like [Source:HGNC Symbol,Acc:HGNC:31452]                                                                     | 3.195543954 | 0.20630291   | 0.337766894  | 3.327493142  |
| ENSORLG000000013618  | -            | -                                                                                                                                           | 6.003891432 | 1.689913423  | 0.465251342  | 4.777007788  |
| ENSORLG000000015534  | -            | -                                                                                                                                           | 6.055150387 | 1.710186558  | 0.272780774  | 4.622899499  |
| ENSORLG000000011981  | -            | -                                                                                                                                           | 6.234856338 | 1.441300909  | 0.123020267  | 4.917058777  |
| ENSORLG000000016083  | abc12        | ATP-binding cassette, sub-family A (ABC), member 12 [Source:ZFIN,Acc:ZDB-GENE-030131_4790]                                                  | 5.272594071 | 1.937706211  | 0.530419601  | 3.86579514   |
| ENSORLG000000016252  | afp4         | type-4 iso-structuring protein LS-12 [Source:NCBI, gene:Acc:101172251]                                                                      | 5.321170818 | 1.834770229  | 1.376936375  | 4.862825173  |
| ENSORLG0000000010108 | kif5c        | kinesin family member 5C [Source:HGNC Symbol,Acc:HGNC:6375]                                                                                 | 3.379584899 | 0.14128051   | 0.17185624   | 3.417098361  |
| ENSORLG000000017131  | -            | -                                                                                                                                           | 4.984957988 | 12.75922451  | 2.698410975  | 10.441101138 |
| ENSORLG000000011459  | dhdn11a      | claudin-11 [Source:NCBI, gene:Acc:101166173]                                                                                                | 3.912529861 | 1.175059321  | 0.335253343  | 3.078992007  |
| ENSORLG000000003766  | dnah2        | dynin, axonemal, heavy chain 2 [Source:ZFIN,Acc:ZDB-GENE-130530-910]                                                                        | 3.990244664 | 1.461317781  | 2.272335461  | 4.801474523  |
| ENSORLG000000009335  | nanos2       | nanos homolog 2 [Source:ZFIN,Acc:ZDB-GENE-130321-1]                                                                                         | 17.00129075 | 0            | 0.312310676  | 17.31409293  |
| ENSORLG000000001876  | pdp4a2       | Phosphoglycerate serine phosphotransferase domain containing 4A [Source:ZFIN,Acc:ZDB-GENE-091204-26]                                        | 6.005890012 | 1.109936805  | -0.5802617   | 4.316178333  |
| ENSORLG000000007157  | d2ch         | claudin 4, like [Source:NCBI, gene:Acc:101165395]                                                                                           | 6.695829758 | -0.442398643 | -2.938312619 | 4.199890978  |
| ENSORLG000000014794  | fbp10a       | fatty acid-binding protein, liver [Source:NCBI, gene:Acc:101155411]                                                                         | 4.095694224 | -1.852225138 | -1.054545559 | 4.42499477   |
| ENSORLG000000077598  | sch73-262b2  | uncharacterized LOC101162703 [Source:NCBI, gene:Acc:101162703]                                                                              | 5.353462884 | 0.253138558  | -0.125834578 | 4.974976042  |
| ENSORLG000000001689  | sch73-262b3  | sch73-262b3 4 [Source:ZFIN,Acc:ZDB-GENE-081031-8]                                                                                           | 3.553542058 | 1.205393302  | 0.944548263  | 3.294182985  |
| ENSORLG000000007246  | SKIDA1       | SKD/DACH domain containing 1 [Source:HGNC Symbol,Acc:HGNC:32697]                                                                            | 6.009598884 | 2.412124098  | -0.01078189  | 3.58725632   |
| ENSORLG000000012041  | KCNQ4        | potassium voltage-gated channel subfamily Q member 4 [Source:HGNC Symbol,Acc:HGNC:6482]                                                     | 4.548630459 | 0.333640857  | 0.17085754   | 3.86633313   |
| ENSORLG000000011141  | LAMA2        | laminin subunit alpha 2 [Source:HGNC Symbol,Acc:HGNC:6482]                                                                                  | 3.542399876 | 0.303039234  | -0.193904583 | 3.045941888  |
| ENSORLG000000002471  | -            | -                                                                                                                                           | 3.674231604 | 1.171406719  | 0.975843412  | 3.479153436  |
| ENSORLG000000006978  | scube2       | signal peptide, CUB domain, EGF-like 2 [Source:ZFIN,Acc:ZDB-GENE-050302_80]                                                                 | 3.904252796 | 0.252647074  | 0.99147045   | 4.643845765  |
| ENSORLG000000005907  | m1ap         | miosis 1 associated protein [Source:ZFIN,Acc:ZDB-GENE-070410_19]                                                                            | 4.308107708 | 0.174119914  | 1.776452112  | 5.910922178  |
| ENSORLG000000016609  | sch73-71d17  | amylodysylase domain containing 1 [Source:HGNC Symbol,Acc:HGNC:28577]                                                                       | 6.942326091 | 3.958979003  | 0.115006266  | 3.098338672  |
| ENSORLG000000016737  | udp2         | uridine phosphorylase 2 [Source:NCBI, gene:Acc:101174453]                                                                                   | 5.134498624 | -0.242385934 | 0.58367476   | 5.961131648  |
| ENSORLG000000007150  | msr12        | methionine sulfoxide reductase B2 [Source:NCBI, gene:Acc:101167250]                                                                         | 5.88107157  | -2.68910228  | -2.443743961 | 6.126916299  |
| ENSORLG000000010483  | -            | -                                                                                                                                           | 3.170231115 | 1.133809349  | 1.57937075   | 3.616281967  |
| ENSORLG000000009256  | h50          | Oryzias latipes 50 kD glycoprotein (h50), mRNA [Source:RefSeq mRNA,Acc:NM_001222820]                                                        | 4.440713565 | -0.037417029 | -1.335978005 | 3.142644864  |
| ENSORLG000000014066  | ust          | uroonyl-C-sulfotransferase [Source:ZFIN,Acc:ZDB-GENE-041001_163]                                                                            | 4.996462513 | 1.257503115  | 2.101792885  | 5.841240889  |
| ENSORLG000000019131  | plac8.1      | placenta-specific 8, tandem duplicate 1 [Source:ZFIN,Acc:ZDB-GENE-050809_124]                                                               | 6.092570968 | -0.725781507 | -2.887977071 | 3.930599119  |
| ENSORLG000000005369  | prtgb        | protogenin homolog b (Gallus gallus) [Source:ZFIN,Acc:ZDB-GENE-060302_11]                                                                   | 4.727588307 | 1.15648294   | 0.565056034  | 3.64649549   |
| ENSORLG000000016886  | LAMA3        | laminin subunit alpha 3 [Source:HGNC Symbol,Acc:HGNC:6483]                                                                                  | 4.528328991 | 1.130506472  | -0.123545379 | 3.274761897  |
| ENSORLG000000006684  | sic16a13     | EGF domain-specific O-linked N-acetylglucosamine (GlcNAc) transferase [Source:ZFIN,Acc:ZDB-GENE-120813-8]                                   | 5.999966754 | 1.174653365  | -0.725312941 | 4.100486166  |
| ENSORLG000000007980  | ecgt         | -                                                                                                                                           | 5.721130912 | 3.272142289  | 1.887717367  | 4.337187896  |
| ENSORLG000000005448  | csalact1a    | chondroitin sulfate N-acetylglucosaminyltransferase 1a [Source:ZFIN,Acc:ZDB-GENE-121129-1]                                                  | 6.311285152 | 3.44910511   | 0.682596128  | 3.54259923   |
| ENSORLG000000006014  | -            | -                                                                                                                                           | 7.938051361 | 3.311147434  | 0.90052113   | 5.557650018  |
| ENSORLG000000011949  | sch211-256a1 | sch211-256a21.4 [Source:ZFIN,Acc:ZDB-GENE-131121-328]                                                                                       | 5.786518539 | 0.93308512   | -1.305078307 | 3.548616335  |
| ENSORLG000000006397  | -            | -                                                                                                                                           | 3.731857346 | 0.616740315  | 1.073496807  | 4.18910016   |
| ENSORLG000000003513  | lmbt1la      | L3mbt-like 1a (Drosophila) [Source:ZFIN,Acc:ZDB-GENE-090312-120]                                                                            | 3.011539774 | 0.57765303   | 1.776620969  | 4.210988703  |

|                      |           |                                                                                                          |              |              |              |              |             |              |
|----------------------|-----------|----------------------------------------------------------------------------------------------------------|--------------|--------------|--------------|--------------|-------------|--------------|
| ENSORLG000000001008  | -         | -                                                                                                        | 2.150464135  | 4.906971602  | -4.780789981 | -0.071737934 | -1.41764234 | -6.12621276  |
| ENSORLG000000000595  | mcot2c    | microtubulin 2 [Source:ZFIN,Acc:ZDB-GENE-040426-692]                                                     | 5.567866653  | 0.500301727  | 1.515585626  | -            | -           | 4.532126418  |
| ENSORLG0000000002571 | zar1      | zyvotc arrest 1 [Source:NCBI, gene:Acc:101175633]                                                        | -8.67074677  | -0.491125711 | -0.157888567 | -            | -           | 8.372057235  |
| ENSORLG000000000341  | zgc:56231 | kinesin-like protein KIF20A [Source:NCBI, gene:Acc:101170741]                                            | -11.05043363 | -0.047302026 | 3.894092357  | -            | -           | 7.107920798  |
| ENSORLG000000000331  | foxh1     | forkhead box H1 [Source:ZFIN,Acc:ZDB-GENE-000616-15]                                                     | -4.030457708 | -0.391880486 | -0.801489542 | -            | -           | 4.45571071   |
| ENSORLG000000000989  | -         | -                                                                                                        | -16.21776804 | 6.332070458  | 10.3615805   | -            | -           | 12.41424245  |
| ENSORLG000000010513  | polr3g    | polymerase (RNA III) (DNA directed) polypeptide G [Source:ZFIN,Acc:ZDB-GENE_081104_312]                  | -5.779740407 | 1.525190813  | 1.538666397  | -            | -           | 5.765732378  |
| ENSORLG000000002846  | zgc:66455 | zgc:66455 [Source:ZFIN,Acc:ZDB-GENE-040426-1642]                                                         | -8.39810291  | -0.637098266 | -1.907862037 | -            | -           | 10.20532987  |
| ENSORLG000000009867  | -         | -                                                                                                        | -10.09067889 | -0.135226667 | -0.352481706 | -            | -           | 10.30744928  |
| ENSORLG000000017255  | ankrd34b  | ankyrin repeat domain 34B [Source:ZFIN,Acc:ZDB-GENE-060526-101]                                          | -4.840070723 | -0.936507271 | -1.974634317 | -            | -           | 5.877712859  |
| ENSORLG000000011280  | -         | -                                                                                                        | -7.60412679  | -0.63529316  | -3.403162758 | -            | -           | 10.37210831  |
| ENSORLG000000014848  | cocd59    | coiled-coil domain containing 59 [Source:NCBI, gene:Acc:101167436]                                       | -16.54852863 | 3.655442389  | 16.59110279  | -            | -           | 3.510456422  |
| ENSORLG000000003758  | -         | -                                                                                                        | -6.885529201 | 0.249293367  | 7.277210114  | -            | -           | 4.833811347  |
| ENSORLG000000018174  | -         | -                                                                                                        | -8.429629755 | -0.561698368 | -1.708465567 | -            | -           | 9.589214037  |
| ENSORLG000000009820  | eloal     | eloina A, like [Source:ZFIN,Acc:ZDB-GENE-131029-2]                                                       | -8.209141592 | 0.811003912  | 2.926714162  | -            | -           | -6.082950552 |
| ENSORLG000000008622  | hmp15     | homo morphogenetic protein 15 [Source:ZFIN,Acc:ZDB-GENE-030131_6115]                                     | -7.819668137 | -0.491621741 | 0.183651118  | -            | -           | 7.144209989  |
| ENSORLG000000005278  | -         | -                                                                                                        | -17.34498545 | -0.657865275 | 12.24195322  | -            | -           | 4.444470378  |
| ENSORLG000000015055  | -         | -                                                                                                        | -5.250942966 | 1.38694438   | -1.144732708 | -            | -           | -7.035405824 |
| ENSORLG000000015660  | -         | -                                                                                                        | -10.01816294 | -0.53186292  | -0.526812982 | -            | -           | 10.12932922  |
| ENSORLG000000012471  | sidkeyp   | Oryzias latipes ZPA domain containing protein (LOC100049331), mRNA [Source:RefSeq mRNA,Acc:NM_001104746] | -10.25956109 | -0.633413036 | -0.212560974 | -            | -           | -9.83822366  |
| ENSORLG000000015491  | btg4      | maternal 89.10 protein [Source:NCBI, gene:Acc:101158866]                                                 | -10.76101894 | -0.080255369 | -0.142916556 | -            | -           | 10.82319324  |
| ENSORLG000000002209  | -         | -                                                                                                        | -4.75610395  | -1.47860483  | -2.758615829 | -            | -           | 6.63732876   |
| ENSORLG000000017820  | -         | -                                                                                                        | -4.802830767 | -2.205568022 | -5.788479229 | -            | -           | 5.38847973   |
| ENSORLG000000001672  | -         | -                                                                                                        | -9.57411083  | -0.358913801 | -0.691758289 | -            | -           | 9.992101885  |
| ENSORLG000000017171  | nm2       | netrin 2 [Source:ZFIN,Acc:ZDB-GENE-050310_2]                                                             | -3.188888272 | 0.08466338   | 2.768995383  | -            | -           | 6.800031545  |
| ENSORLG000000014823  | -         | -                                                                                                        | -9.444179414 | 1.713166299  | 5.132195505  | -            | -           | 6.024669601  |
| ENSORLG000000011315  | -         | -                                                                                                        | -8.810131318 | -0.137868782 | 3.448195291  | -            | -           | 5.223483013  |
| ENSORLG000000014654  | -         | -                                                                                                        | -10.24496952 |              |              |              |             |              |

|                      |                  |                                                                                                     |             |              |              |             |
|----------------------|------------------|-----------------------------------------------------------------------------------------------------|-------------|--------------|--------------|-------------|
| ENSRORG0000017144    | cdkn2c           | cyclin-dependent kinase inhibitor 2C (p18, inhibits CDK4) [Source:ZFIN;Acc:ZDB-GENE-081104-145]     | 16.78895875 | 13.61802524  | 2.175288347  | 5.346589436 |
| ENSRORG0000007279    | -                | -                                                                                                   | 16.31224173 | 13.81647671  | 2.64052061   | 5.136789938 |
| ENSRORG0000001205    | t10              | coagulation factor X [Source:ZFIN;Acc:ZDB-GENE-012206-9]                                            | 4.608270659 | 2.49739447   | 1.611704987  | 3.723065727 |
| ENSRORG0000002094    | ompa             | olfactory marker protein a [Source:ZFIN;Acc:ZDB-GENE-050526-118]                                    | 3.91927582  | 1.869719268  | 2.057911325  | 4.107953816 |
| ENSRORG00000008740   | sidkey-943.4     | sidkey-943.4 [Source:ZFIN;Acc:ZDB-GENE-110914-175]                                                  | 4.211474052 | 1.699933139  | 0.622589191  | 3.134617257 |
| ENSRORG00000016013   | agmat            | agmatine ureohydrolase (agmatinase) [Source:ZFIN;Acc:ZDB-GENE-080929-696]                           | 5.322016072 | 1.210188821  | -1.017446946 | 3.094866307 |
| ENSRORG00000005514   | cef1             | penta-EF-hand domain containing 1 [Source:ZFIN;Acc:ZDB-GENE-040601-259]                             | 4.21235548  | 1.087070447  | 0.514710327  | 3.645360094 |
| ENSRORG00000008980   | -                | -                                                                                                   | 5.895270016 | 0.759553634  | -0.568398662 | 4.567803489 |
| ENSRORG00000004118   | STRADB           | STB2-related kinase adaptor beta [Source:HGNC Symbol;Acc:HGNC:13205]                                | 5.493472527 | 1.596834018  | 1.336802875  | 5.231924979 |
| ENSRORG000000016512  | ofa              | Oryzias latipes transferin (LOC100144362), mRNA [Source:RefSeq; mRNUc:Acc:NM_001122932]             | 4.958837946 | 1.396252138  | 0.124325138  | 3.685395528 |
| ENSRORG00000007135   | mytqphb          | myosin binding protein HB [Source:ZFIN;Acc:ZDB-GENE-030131-9794]                                    | 3.289160893 | -0.594059504 | 0.710440667  | 4.594147251 |
| ENSRORG00000017709   | c10a3b           | complement component 1, s subcomponent-like 3b [Source:ZFIN;Acc:ZDB-GENE-040476-1808]               | 3.310690759 | 0.167831726  | -0.109096676 | 3.034245587 |
| ENSRORG00000012301   | e2f7             | E2F transcription factor 7 [Source:ZFIN;Acc:ZDB-GENE-030131-3527]                                   | 6.018114024 | 2.770710646  | 0.574208973  | 3.822089756 |
| ENSRORG00000006037   | qs12a            | regulator of G protein signaling 12a [Source:ZFIN;Acc:ZDB-GENE-030131-2614]                         | 3.828309023 | 0.503764007  | 0.986824789  | 4.29365389  |
| ENSRORG00000004874   | -                | -                                                                                                   | 3.787584312 | 1.671704521  | 0.961841522  | 3.078206439 |
| ENSRORG00000005289   | -                | -                                                                                                   | 5.181060679 | 0.815466837  | -1.042806722 | 3.303271641 |
| ENSRORG00000009000   | trm169           | tripartite motif containing 69 [Source:ZFIN;Acc:ZDB-GENE-030131-857]                                | 4.754351768 | 1.60775608   | 1.160101926  | 4.307182368 |
| ENSRORG000000015286  | mag              | myelin associated glycoprotein [Source:NCBI gene;Acc:101153465]                                     | 4.827218726 | -1.011577996 | 0.205644551  | 6.0492383   |
| ENSRORG00000012800   | pmepa1           | prostate transmembrane protein, androgen induced 1 [Source:ZFIN;Acc:ZDB-GENE-040718-320]            | 4.83816248  | 0.64163733   | -0.92705202  | 3.269957098 |
| ENSRORG00000016913   | trm110l1         | transmembrane protein 110, like [Source:ZFIN;Acc:ZDB-GENE-040426-912]                               | 5.632682919 | 2.326396554  | 1.061651348  | 4.368426042 |
| ENSRORG000000011205  | adcypa1a         | adenylate cyclase activating polypeptide 1a [Source:ZFIN;Acc:ZDB-GENE-020809-4]                     | 3.550977534 | -0.292244871 | 0.822211651  | 4.670918235 |
| ENSRORG000000001747  | NBL1             | neuroblastoma 1, DAN family BMP antagonist [Source:NCBI gene;Acc:101167028]                         | 5.601706533 | 0.763175508  | -0.788942707 | 4.050075145 |
| ENSRORG000000012745  | -                | cartonic anhydrase 1 [Source:NCBI gene;Acc:101168031]                                               | 6.469646621 | -0.382185167 | -1.387467012 | 5.464848512 |
| ENSRORG000000014099  | rab42b           | RAB42, member RAS oncogene family [Source:ZFIN;Acc:ZDB-GENE-050417-172]                             | 5.700016794 | -0.232759827 | 1.500872633  | 6.00072603  |
| ENSRORG00000004897   | stim2a           | stromal interaction molecule 2a [Source:ZFIN;Acc:ZDB-GENE-130530-765]                               | 17.02757916 | 12.21522052  | 0.898549463  | 5.711375393 |
| ENSRORG00000018142   | ezra             | ezrin a [Source:ZFIN;Acc:ZDB-GENE-050522-18]                                                        | 6.210809147 | -0.26380433  | -3.115093153 | 3.359281424 |
| ENSRORG000000015429  | dhcr7            | 7-dehydrocholesterol reductase [Source:ZFIN;Acc:ZDB-GENE-030912-9]                                  | 4.448970568 | 1.655821741  | 0.860196146  | 3.653819438 |
| ENSRORG00000017346   | sc25a12          | scn carrier family 25 (aspartate/glutamate carrier), member 12 [Source:ZFIN;Acc:ZDB-GENE-031006-13] | 4.401282152 | 0.020569605  | 1.21177841   | 3.169408819 |
| ENSRORG00000009070   | lmy1 (l of man)  | lysine mediating and regulatory protein, p53 cofactor [Source:HGNC Symbol;Acc:HGNC:28916]           | 3.816227968 | -0.996412534 | -1.210426884 | 4.130781341 |
| ENSRORG00000006351   | zpc123217        | zpc123217 [Source:ZFIN;Acc:ZDB-GENE-051113-188]                                                     | 4.654059516 | -0.523342922 | -0.06954213  | 5.117446771 |
| ENSRORG000000012541  | lcat             | lecithin:cholesterol acyltransferase [Source:NCBI gene;Acc:101164434]                               | 4.12748632  | 1.927496988  | 1.276149326  | 3.476622767 |
| ENSRORG000000011023  | si.ch211-117c9.5 | si.ch211-117c9.5 [Source:ZFIN;Acc:ZDB-GENE-110408-7]                                                | 3.589986301 | -0.046028292 | -0.051159551 | 5.64855472  |
| ENSRORG00000005556   | birc2            | baculoviral IAP repeat containing 2 [Source:ZFIN;Acc:ZDB-GENE-030825-6]                             | 3.573155044 | 0.93531802   | -1.07726811  | 3.715049095 |
| ENSRORG000000010023  | -                | -                                                                                                   | 3.450562145 | -0.292415172 | -0.070110023 | 3.157614002 |
| ENSRORG000000012085  | enpp1            | ectonucleotide pyrophosphatase/phosphodiesterase 1 [Source:ZFIN;Acc:ZDB-GENE-040724-172]            | 3.700257996 | 1.305580288  | 1.086317445  | 3.481482465 |
| ENSRORG00000009198   | osbp2            | oxysterol binding protein 2 [Source:ZFIN;Acc:ZDB-GENE-091113-18]                                    | 4.008002116 | 0.141112931  | 2.150184736  | 6.017558494 |
| ENSRORG000000016520  | sgk1             | serum/glucocorticoid regulated kinase 1 [Source:ZFIN;Acc:ZDB-GENE-030131-2860]                      | 4.97222678  | 0.426744688  | -0.526733425 | 4.019233378 |
| ENSRORG000000013627  | -                | -                                                                                                   | 3.375272815 | 2.220380024  | -0.222917363 | 3.932452421 |
| ENSRORG000000017192  | phgdh            | phosphoglycerate dehydrogenase [Source:NCBI gene;Acc:101158150]                                     | 5.091161834 | 2.780491264  | 0.778615223  | 3.089772023 |
| ENSRORG00000006894   | acid1b           | acid-sensing (proton-gated) ion channel 1b [Source:ZFIN;Acc:ZDB-GENE-040513-11]                     | 5.482648022 | 1.815796043  | -0.05550071  | 3.611840242 |
| ENSRORG000000017435  | dna              | dydroprotein, alpha [Source:ZFIN;Acc:ZDB-GENE-070117-2]                                             | 6.797435781 | 2.047023019  | 0.315959161  | 5.666864234 |
| ENSRORG000000015256  | lhx1             | Lhx1 [Source:ZFIN;Acc:ZDB-GENE-030805-5]                                                            | 18.24612227 | 12.92330891  | -2.03335212  | 3.289926731 |
| ENSRORG000000008937  | si.ch73-61d6.3   | si.ch73-61d6.3 [Source:ZFIN;Acc:ZDB-GENE-091204-109]                                                | 4.264459025 | 0.866865476  | 0.098811052  | 3.496891007 |
| ENSRORG000000010258  | Hdcd1            | putative hexokinase HDCD1 [Source:NCBI gene;Acc:101164434]                                          | 5.064043105 | 1.414161718  | 0.255149485  | 3.905516568 |
| ENSRORG000000092222  | scd1             | scd1, C10A desaturase [Source:NCBI gene;Acc:101160599]                                              | 4.619966738 | 2.311741019  | 1.088921795  | 3.37932035  |
| ENSRORG00000007849   | cxcl19           | interleukin-8 [Source:NCBI gene;Acc:101155802]                                                      | 5.554361816 | 0.128911126  | -0.953023621 | 4.472911703 |
| ENSRORG000000013799  | -                | -                                                                                                   | 5.323098088 | 1.645890322  | -0.08782929  | 3.589711385 |
| ENSRORG000000006713  | -                | -                                                                                                   | 3.206648488 | 0.858541739  | 1.246547995  | 3.957139505 |
| ENSRORG000000021522  | RF00566          | small nuclear RNA SNORA35 [Source:NCBI gene;Acc:111948276]                                          | 4.349602419 | 2.49316115   | 1.180427041  | 3.037356074 |
| ENSRORG0000000013449 | -                | -                                                                                                   | 4.3229328   | 1.116250717  | 3.42054433   |             |
| ENSRORG00000004855   | adss             | adenylosuccinate synthase [Source:ZFIN;Acc:ZDB-GENE-050417-337]                                     | 6.046817585 | 1.613430227  | -0.205420304 | 4.22845255  |
| ENSRORG000000099912  | usp2a            | ubiquitin specific peptidase 2a [Source:ZFIN;Acc:ZDB-GENE-041212-59]                                | 3.77409566  | 1.136069533  | 2.711718938  | 5.355680459 |
| ENSRORG000000015528  | zgc-109949       | riboflavin-binding protein [Source:NCBI gene;Acc:101163821]                                         | 5.586458086 | -3.528951627 | -0.10329821  | 3.70329821  |
| ENSRORG00000005935   | -                | -                                                                                                   | 6.829029028 | 1.014066171  | -2.79101453  | 3.024433517 |
| ENSRORG000000011133  | -                | -                                                                                                   | 4.094662871 | 0.2853472    | 1.045625688  | 4.855431963 |
| ENSRORG000000012461  | ptx3b            | pentraxin 3, long b [Source:ZFIN;Acc:ZDB-GENE-081104-385]                                           | 6.136739059 | -0.011381781 | -2.555195837 | 3.593410484 |
| ENSRORG000000012162  | dPYSL2           | dihydropyrimidinase like 2 [Source:HGNC Symbol;Acc:HGNC:3014]                                       | 5.430049876 | 1.94215413   | 1.527491221  | 5.01587293  |
| ENSRORG000000020604  | -                | -                                                                                                   | 4.337956413 | 1.754651276  | 0.709339927  | 3.293152938 |
| ENSRORG000000013976  | -                | -                                                                                                   | 5.714088892 | -1.236642056 | -3.710245734 | 3.240996955 |
| ENSRORG0000000909    | CLRN3            | clrn3 [Source:NCBI gene;Acc:101166090]                                                              | 3.500507489 | -0.825967736 | -1.014948064 | 3.312052324 |
| ENSRORG000000010014  | si.skey-9110.3   | si.skey-9110.3 [Source:ZFIN;Acc:ZDB-GENE-081105-124]                                                | 5.109134691 | 1.788426746  | 0.198685116  | 3.517987999 |
| ENSRORG000000011733  | rhcg             | Rh family, C glycoprotein b [Source:ZFIN;Acc:ZDB-GENE-040426-295]                                   | 5.856858762 | -1.375052779 | -2.715001924 | 4.51939862  |
| ENSRORG000000018220  | fer16            | fer-1 like family member 6 [Source:ZFIN;Acc:ZDB-GENE-070912-312]                                    | 5.412851522 | 1.17921807   | 1.254521329  | 5.488636372 |

|                     |           |                                                                                                            |   |   |   |               |
|---------------------|-----------|------------------------------------------------------------------------------------------------------------|---|---|---|---------------|
| ENSRORG00000011283  | -         | -                                                                                                          | - | - | - | -             |
| ENSRORG00000000073  | -         | -                                                                                                          | - | - | - | -9.411495396  |
| ENSRORG000000010587 | -         | -                                                                                                          | - | - | - | -3.354521546  |
| ENSRORG00000016443  | igf1      | insulin like growth factor 1 [Source:NCBI gene;Acc:101168167]                                              | - | - | - | -10.47330952  |
| ENSRORG00000006854  | sidkey-28 | sidkey-20q17.3 [Source:ZFIN;Acc:ZDB-GENE-131117-37]                                                        | - | - | - | -0.708973626  |
| ENSRORG000000004318 | hcn2b     | Hypertension activated cyclic nucleotide-gated potassium channel 2b [Source:ZFIN;Acc:ZDB-GENE-030131-8228] | - | - | - | 0.082654253   |
| ENSRORG000000005919 | -         | -                                                                                                          | - | - | - | -5.047278897  |
| ENSRORG000000005996 | fbxo32    | F-box protein 32 [Source:NCBI gene;Acc:101164672]                                                          | - | - | - | -0.255519136  |
| ENSRORG000000010103 | -         | -                                                                                                          | - | - | - | -4.59619071   |
| ENSRORG000000011605 | -         | -                                                                                                          | - | - | - | -4.720054665  |
| ENSRORG000000011815 | -         | -                                                                                                          | - | - | - | 3.823711533   |
| ENSRORG00000013494  | BMP7      | bone morphogenetic protein 7 [Source:HGNC Symbol;Acc:HGNC:1014]                                            | - | - | - | 0.00076633    |
| ENSRORG00000013525  | lsm14b    | LSM family member 14B [Source:ZFIN;Acc:ZDB-GENE-040426-779]                                                | - | - | - | -3.254503534  |
| ENSRORG000000140157 | cyp26a1   | Cyp26a1, uncharacterized LOC101163484 [Source:NCBI gene;Acc:101163484]                                     | - | - | - | 0.828457469   |
| ENSRORG00000010075  | grip2a    | glutamate receptor interacting protein 2a [Source:ZFIN;Acc:ZDB-GENE-081104-132]                            | - | - | - | -7.956665846  |
| ENSRORG000000017250 | foxl2a    | forkhead box F2a [Source:ZFIN;Acc:ZDB-GENE-110407-5]                                                       | - | - | - | 8.116753462   |
| ENSRORG000000014532 | h3k321    | SH3 domain containing 21 [Source:ZFIN;Acc:ZDB-GENE-051120-57]                                              | - | - | - | -0.29106691   |
| ENSRORG000000006281 | guca1c    | guanylyl cyclase-activating protein 3 [Source:NCBI gene;Acc:101172917]                                     | - | - | - | -0.297878451  |
| ENSRORG000000013038 | calt2a    | calretinin [Source:NCBI gene;Acc:101174993]                                                                | - | - | - | -3.10811529   |
| ENSRORG000000008333 | -         | -                                                                                                          | - | - | - | -0.219832595  |
| ENSRORG000000004312 | marveld2  | MARVEL domain containing 2b [Source:ZFIN;Acc:ZDB-GENE-050208-54]                                           | - | - | - | -1.36187333   |
| ENSRORG00000017278  | foxp2a    | forkhead box P2a [Source:ZFIN;Acc:ZDB-GENE-110407-5]                                                       | - | - | - | -3.16187333   |
| ENSRORG000000004348 | -         | -                                                                                                          | - | - | - | -0.503620021  |
| ENSRORG000000010501 | -         | -                                                                                                          | - | - | - | -4.74967273   |
| ENSRORG000000015942 | -         | -                                                                                                          | - | - | - | -9.75041499   |
| ENSRORG000000009206 | -         | -                                                                                                          | - | - | - | -0.742078532  |
| ENSRORG00000017278  | marveld2  | MARVEL domain containing 2b [Source:ZFIN;Acc:ZDB-GENE-050208-54]                                           | - | - | - | -3.05098704   |
| ENSRORG000000004348 | -         | -                                                                                                          | - | - | - | -0.511958338  |
| ENSRORG000000010501 | -         | -                                                                                                          | - | - | - | -5.060676794  |
| ENSRORG000000015942 | -         | -                                                                                                          | - | - | - | -0.609219055  |
| ENSRORG000000009206 | -         | -                                                                                                          | - | - | - | -0.945668515  |
| ENSRORG00000017278  | marveld2  | MARVEL domain containing 2b [Source:ZFIN;Acc:ZDB-GENE-050208-54]                                           | - | - | - | -3.506324312  |
| ENSRORG000000004348 | -         | -                                                                                                          | - | - | - | -19.0187195   |
| ENSRORG000000010501 | -         | -                                                                                                          | - | - | - | -0.189076043  |
| ENSRORG000000015942 | -         | -                                                                                                          | - | - | - | -12.7914122   |
| ENSRORG000000009206 | -         | -                                                                                                          | - | - | - | -6.037815967  |
| ENSRORG00000017278  | marveld2  | MARVEL domain containing 2b [Source:ZFIN;Acc:ZDB-GENE-050208-54]                                           | - | - | - | -3.08513974   |
| ENSRORG000000004348 | -         | -                                                                                                          | - | - | - | -0.8792905427 |
| ENSRORG000000010501 | -         | -                                                                                                          | - | - | - | -16.37573691  |
| ENSRORG000000015942 | -         | -                                                                                                          | - | - | - | -0.522145812  |
| ENSRORG000000009206 | -         | -                                                                                                          | - | - | - | -10.68675845  |
| ENSRORG00000017278  | marveld2  | MARVEL domain containing 2b [Source:ZFIN;Acc:ZDB-GENE-050208-54]                                           | - | - | - | -4.90757431   |
| ENSRORG000000004348 | -         | -                                                                                                          | - | - | - | -0.93193556   |
| ENSRORG000000010501 |           |                                                                                                            |   |   |   |               |

|                     |                                                                          |                                                                                                            |             |              |              |             |
|---------------------|--------------------------------------------------------------------------|------------------------------------------------------------------------------------------------------------|-------------|--------------|--------------|-------------|
| ENSRGLG00000004849  | csf1ra                                                                   | colony stimulating factor 1 receptor, alpha<br>[Source:ZFIN;Acc:ZDB-Gene-001205-1]                         | 5.035280899 | 1.5683925    | 0.01233996   | 3.479709373 |
| ENSRGLG00000001711  | cpnb4b                                                                   | cytosolic polyubiquitylation element binding protein 4b<br>[Source:ZFIN;Acc:ZDB-Gene-170601-167]           | 3.666201114 | 0.878587993  | 1.495306232  | 4.283404172 |
| ENSRGLG00000001576  | SLC25A24                                                                 | solute carrier family 25 member 24<br>[Source:HGNC;Symbol:SLC25A24]                                        | 5.182110709 | 1.839843362  | 0.260042641  | 3.602797487 |
| ENSRGLG00000007552  | OTU domain-containing protein 75<br>[Source:ZFIN;Acc:ZDB-Gene-001187-27] | 6.086657471                                                                                                | 1.895637599 | -1.0819362   | 3.109565421  |             |
| ENSRGLG00000004933  | pkpka                                                                    | phosphotransferase, platelet alpha<br>[Source:ZFIN;Acc:ZDB-Gene-001112-229]                                | 4.364249117 | 1.361932027  | 0.124191754  | 3.124191754 |
| ENSRGLG00000001885  | dnm3a                                                                    | dynamin 3a<br>[Source:ZFIN;Acc:ZDB-Gene-040724-76]                                                         | 3.939781007 | 1.967745937  | 1.496684062  | 3.469201824 |
| ENSRGLG00000001117  | cor3                                                                     | RST co-repressor 3<br>[Source:ZFIN;Acc:ZDB-Gene-050208-371]                                                | 4.592445438 | 1.74767479   | 1.020977351  | 3.866323478 |
| ENSRGLG00000007890  | snpd5                                                                    | sphingomyelin phosphodiesterase 5<br>[Source:NCBI;Gene:101160838]                                          | 5.021137496 | 1.919576651  | 1.256566851  | 4.358611607 |
| ENSRGLG00000001527  | -                                                                        | PTB domain-containing engulfment adapter protein 1<br>[Source:NCBI;Gene:Acc:101169696]                     | 4.767992996 | -0.002835629 | -1.603549942 | 3.167763564 |
| ENSRGLG00000001052  | -                                                                        | -                                                                                                          | 4.836939554 | 0.10772428   | 0.472640036  | -           |
| ENSRGLG00000001073  | tatp7                                                                    | fatty acid binding protein 7<br>[Source:NCBI;Gene:Acc:100144367]                                           | 4.736362355 | -0.736513441 | -0.06508878  | 5.41279317  |
| ENSRGLG00000007984  | -                                                                        | -                                                                                                          | 5.691989205 | -0.048254718 | -0.481079684 | 5.23964292  |
| ENSRGLG00000003124  | si:dkey-121b1.7                                                          | si:dkey-121b1.7<br>[Source:ZFIN;Acc:ZDB-Gene-090312-176]                                                   | 16.27244153 | 11.36663367  | 0.007508532  | 4.913786136 |
| ENSRGLG00000009676  | ppt1                                                                     | palmitoyl-protein thioesterase 7<br>[Source:NCBI;Gene:Acc:101168727]                                       | 3.848606893 | 0.142131495  | 0.180698876  | 3.88761006  |
| ENSRGLG00000007249  | slc7a7                                                                   | solute carrier family 7 member 7<br>[Source:NCBI;Gene:Acc:101169978]                                       | 4.821142219 | 0.662043947  | 1.32894702   | 5.489532178 |
| ENSRGLG00000003164  | -                                                                        | very long-chain acyl-CoA synthetase<br>[Source:NCBI;Gene:Acc:101155585]                                    | 3.871253351 | 1.429712351  | 0.882143658  | 3.324167721 |
| ENSRGLG000000018064 | ctgfa                                                                    | connective tissue growth factor A<br>[Source:ZFIN;Acc:ZDB-Gene-030131-102]                                 | 6.007414093 | 1.399951987  | -0.690786687 | 3.917160504 |
| ENSRGLG000000017075 | -                                                                        | guanylin<br>[Source:NCBI;Gene:Acc:101159096]                                                               | 6.55523005  | 0.649071976  | -2.158009152 | 3.748926911 |
| ENSRGLG000000017225 | -                                                                        | bifunctional protein GMIU<br>[Source:NCBI;Gene:Acc:101163376]                                              | 16.53737039 | 13.22988379  | 9.00915513   | 4.028869584 |
| ENSRGLG000000017848 | myl12.2                                                                  | myosin, light chain 12, genome duplicate 2<br>[Source:ZFIN;Acc:ZDB-Gene-030131-9028]                       | 3.014185625 | 1.238442833  | 1.969490518  | 3.745718212 |
| ENSRGLG000000010490 | usp54b                                                                   | ubiquitin specific peptidase 54b<br>[Source:ZFIN;Acc:ZDB-Gene-090828-3]                                    | 4.728614751 | 1.496850811  | 0.390115892  | 3.620711882 |
| ENSRGLG00000005664  | col11a1a                                                                 | collagen, type XI, alpha 1A<br>[Source:ZFIN;Acc:ZDB-Gene-070208-167]                                       | 4.036507447 | 0.31441222   | -0.598643252 | 3.133251685 |
| ENSRGLG00000003989  | ITGB8                                                                    | integrin subunit beta 8<br>[Source:HGNC;Symbol:ITGB8]                                                      | 6.45124683  | 1.991168809  | 0.163528815  | 4.62409138  |
| ENSRGLG000000015582 | mep1a.2                                                                  | meprin A, alpha (PABA peptide hydrolase), tandem duplicate 2<br>[Source:ZFIN;Acc:ZDB-Gene-041001-208]      | 4.677476231 | -0.839820227 | -1.642529913 | 3.875252596 |
| ENSRGLG00000001338  | nesp3                                                                    | nescient helix-loop-helix protein 3<br>[Source:ZFIN;Acc:ZDB-Gene-030131-9028]                              | 3.802545072 | 0.508045378  | 0.075667327  | 3.106551438 |
| ENSRGLG00000008806  | sk1                                                                      | salt-inducible kinase 1<br>[Source:ZFIN;Acc:ZDB-Gene-030131-9468]                                          | 6.841748531 | 1.139088931  | -1.24051349  | 4.458092054 |
| ENSRGLG00000000216  | rasd4                                                                    | GTP-binding protein Rhes<br>[Source:NCBI;Gene:Acc:101163276]                                               | 3.519557614 | -0.77258662  | 0.305874084  | 4.598501159 |
| ENSRGLG00000000414  | slc12a3                                                                  | solute carrier family 12 (sodium/chloride transporter), member 3<br>[Source:ZFIN;Acc:ZDB-Gene-030131-9505] | 6.23948583  | -0.93596482  | -3.83059484  | 3.345371567 |
| ENSRGLG000000017879 | scg5                                                                     | secretogranin V<br>[Source:ZFIN;Acc:ZDB-Gene-040426-1687]                                                  | 3.847117884 | 1.114942308  | 0.458624954  | 3.191286372 |
| ENSRGLG00000001877  | cgfr                                                                     | opioid growth factor receptor<br>[Source:ZFIN;Acc:ZDB-Gene-030131-377]                                     | 4.442631092 | 1.631898565  | 1.867428789  | 4.678842721 |
| ENSRGLG000000016907 | TTCC9C (1 of 4)                                                          | tetratricopeptide repeat domain 39C<br>[Source:HGNC;Symbol:TTCC9C]                                         | 4.392818829 | 1.931468271  | 0.647468027  | 3.106551438 |
| ENSRGLG000000011505 | CPLX2                                                                    | complexin 2<br>[Source:NCBI;Gene:Acc:101172505]                                                            | 16.85093715 | 11.81900949  | -0.571331659 | 4.461063619 |
| ENSRGLG000000013351 | angpt2b                                                                  | angiopoietin-like 2b<br>[Source:ZFIN;Acc:ZDB-Gene-050624-11]                                               | 4.962646462 | 0.961101538  | 0.613494873  | 4.615614747 |
| ENSRGLG000000018238 | -                                                                        | -                                                                                                          | 3.470870715 | -0.884296236 | -0.957179053 | 3.39847298  |
| ENSRGLG00000009846  | -                                                                        | -                                                                                                          | 6.135793781 | 2.86132568   | 0.95947051   | 4.10023718  |
| ENSRGLG00000003679  | -                                                                        | -                                                                                                          | 4.025913947 | 1.102163487  | 2.15611069   | 5.080245399 |
| ENSRGLG000000011982 | -                                                                        | F-box only protein 2<br>[Source:NCBI;Gene:Acc:101172071]                                                   | 4.914621663 | 2.048488017  | 0.775348514  | 3.64198786  |
| ENSRGLG00000007834  | gashb                                                                    | g-protein-coupled receptor class B group member 10<br>[Source:NCBI;Gene:Acc:101156637]                     | 4.814052954 | 1.899960264  | 0.386425851  | 3.305004417 |
| ENSRGLG00000002909  | prh2b                                                                    | granth-like transcription factor 2b<br>[Source:ZFIN;Acc:ZDB-Gene-060503-719]                               | 4.929950541 | 0.025025599  | -0.840976883 | 4.06434596  |
| ENSRGLG00000005954  | -                                                                        | cholesterolemia<br>[Source:NCBI;Gene:Acc:101165324]                                                        | 5.320813665 | -0.470598629 | 2.612252629  | 4.404146663 |
| ENSRGLG00000004344  | KIF5B (1 of 4)                                                           | kinesin family member 5B<br>[Source:NCBI;Gene:Acc:101179898]                                               | 3.216432176 | 0.560460594  | 0.866554787  | 3.522111539 |
| ENSRGLG00000008342  | cahz                                                                     | cardiac anhydrase<br>[Source:ZFIN;Acc:ZDB-Gene-980256-39]                                                  | 5.77667168  | 0.303701295  | 0.470334041  | 5.943789481 |
| ENSRGLG000000011483 | slc25a48                                                                 | solute carrier family 25, member 48<br>[Source:ZFIN;Acc:ZDB-Gene-040718-60]                                | 5.685994281 | -1.684674119 | -2.762477874 | 4.60867481  |
| ENSRGLG00000001467  | crabp1a                                                                  | cellular retinoic acid binding protein 1a<br>[Source:ZFIN;Acc:ZDB-Gene-020320-3]                           | 5.862821026 | 1.641403541  | 0.965956168  | 5.187857101 |
| ENSRGLG000000011217 | meftf                                                                    | mesencephalic fold-inducing factor<br>[Source:ZFIN;Acc:ZDB-Gene-050309-40]                                 | 6.693760305 | -1.47597292  | -0.793689737 | 4.076549946 |
| ENSRGLG000000015960 | vsn11a                                                                   | vesin-1-like protein 1<br>[Source:NCBI;Gene:Acc:101164199]                                                 | 3.256156419 | -1.814276657 | 0.748063848  | 5.81898533  |
| ENSRGLG000000013859 | -                                                                        | N-acyl phosphatidylethanolamine phospholipase D<br>[Source:NCBI;Gene:Acc:101162688]                        | 6.170540679 | 1.951848385  | 1.143880703  | 5.363064595 |
| ENSRGLG000000012988 | ppp6                                                                     | purine nucleoside phosphorylase 6<br>[Source:ZFIN;Acc:ZDB-Gene-040426-1800]                                | 5.893273942 | -2.23520329  | -3.118210652 | 5.011069251 |
| ENSRGLG000000011026 | COLEC12                                                                  | collectin subfamily member 12<br>[Source:HGNC;Symbol:COLEC12]                                              | 5.145254986 | 0.172775976  | -0.111073487 | 4.861891268 |
| ENSRGLG00000004134  | zpc-92275                                                                | zpc-92275<br>[Source:ZFIN;Acc:ZDB-Gene-040718-366]                                                         | 4.140913154 | -1.968802591 | 2.280719622  | 4.801918995 |
| ENSRGLG00000007662  | KIAA0895                                                                 | KIAA0895<br>[Source:HGNC;Symbol:KIAA0895]                                                                  | 5.102737269 | 2.436365107  | 2.423284934  | 5.10851871  |
| ENSRGLG00000004826  | mical2a                                                                  | microtubule-associated protein 2, LIM domain containing 2<br>[Source:ZFIN;Acc:ZDB-Gene-110110-21]          | 3.98539871  | 2.07058628   | 1.50498769   | 3.418722505 |
| ENSRGLG000000011107 | wnt7ba                                                                   | Wnt-7b<br>[Source:NCBI;Gene:Acc:101170723]                                                                 | 6.318805159 | 4.094127506  | 0.985885481  | 3.209510378 |
| ENSRGLG00000006247  | E1FA                                                                     | eukaryotic translation initiation factor 5A<br>[Source:HGNC;Symbol:EIF5A]                                  | 4.112358586 | 2.169620949  | 2.195184043  | 4.139589394 |
| ENSRGLG00000008709  | ctnb                                                                     | catenin<br>[Source:NCBI;Gene:Acc:101159012]                                                                | 5.018164794 | 1.912353254  | 0.828767953  | 3.933061071 |
| ENSRGLG000000015271 | -                                                                        | -                                                                                                          | 18.05564895 | 10.66970204  | -0.85112552  | 6.301238471 |
| ENSRGLG000000015666 | elmo2                                                                    | engulfment and cell motility 2<br>[Source:ZFIN;Acc:ZDB-Gene-140106-84]                                     | 3.77614046  | 2.29038491   | 2.746188118  | 4.23240196  |
| ENSRGLG000000007005 | -                                                                        | -                                                                                                          | 5.048994392 | 1.113066096  | -0.891400137 | 3.042011923 |
| ENSRGLG00000003091  | -                                                                        | -                                                                                                          | 4.321099323 | -0.636207489 | -0.772926052 | 4.184866612 |
| ENSRGLG00000006852  | zbtb22b                                                                  | zinc finger and BTB domain containing 22b<br>[Source:ZFIN;Acc:ZDB-Gene-010110-4]                           | 5.972249607 | 2.958873112  | 1.196705745  | 4.213707943 |
| ENSRGLG00000004220  | KCNJ15                                                                   | potassium voltage-gated channel subfamily J member 15<br>[Source:HGNC;Symbol:KCNJ15]                       | 5.878936368 | -2.586677298 | -3.24687767  | 5.22018351  |
| ENSRGLG00000006665  | fosb                                                                     | FBJ murine osteosarcoma viral oncogene homolog B<br>[Source:ZFIN;Acc:ZDB-Gene-041114-181]                  | 6.625596931 | 1.093952569  | -0.597685639 | 4.93442431  |
| ENSRGLG00000002758  | gpr371a                                                                  | G protein-coupled receptor 37, like 1a<br>[Source:ZFIN;Acc:ZDB-Gene-110411-20]                             | 3.924964414 | 0.8088825    | 0.3402056    | 3.420532991 |
| ENSRGLG00000004114  | rabgef1                                                                  | RAB guanine nucleotide exchange factor (GEF) 1<br>[Source:ZFIN;Acc:ZDB-Gene-040426-1486]                   | 3.574857207 | 0.772409632  | 0.806543935  | 3.686384676 |

|                     |         |                                                                                                               |   |   |   |              |              |              |              |
|---------------------|---------|---------------------------------------------------------------------------------------------------------------|---|---|---|--------------|--------------|--------------|--------------|
| ENSRGLG000000003695 | -       | uncharacterized LOC101159113<br>[Source:NCBI;Gene:Acc:101159113]                                              | - | - | - | -10.06357487 | -0.572513593 | -1.49375366  | -10.98433375 |
| ENSRGLG00000004579  | -       | -                                                                                                             | - | - | - | -8.736815446 | -0.440464914 | -1.783202038 | -10.0796781  |
| ENSRGLG000000010476 | -       | -                                                                                                             | - | - | - | -10.21731668 | -0.436620299 | -0.686660179 | -10.476811   |
| ENSRGLG000000003145 | ctss    | Oryzias latipes cathepsin S (ctss), mRNA<br>[Source:RefSeq;mRNA:NM_001104687]                                 | - | - | - | -10.01124136 | -0.384580303 | -1.127056126 | -10.75323324 |
| ENSRGLG000000012216 | -       | -                                                                                                             | - | - | - | -10.0139003  | -0.06958535  | -0.642727246 | -10.59025468 |
| ENSRGLG00000000429  | -       | -                                                                                                             | - | - | - | -9.742704272 | 2.264537711  | 2.739538125  | -9.271504184 |
| ENSRGLG00000000095  | -       | -                                                                                                             | - | - | - | -6.126715944 | 0.219692534  | -12.66892815 | -19.65550808 |
| ENSRGLG00000010694  | -       | -                                                                                                             | - | - | - | -5.784744004 | -0.108259803 | -2.108259803 | -4.776854152 |
| ENSRGLG000000012029 | -       | -                                                                                                             | - | - | - | -9.207263498 | -0.918827617 | 0.609178577  | -7.678727329 |
| ENSRGLG000000015622 | flvcr2a | feline leukemia virus subgroup C cellular receptor family, member 2a<br>[Source:ZFIN;Acc:ZDB-Gene-111020-141] | - | - | - | -8.205072842 | -0.127090009 | 0.915361434  | -7.162135828 |
| ENSRGLG00000004859  | mir411b | miR411b<br>[Source:ZFIN;Acc:ZDB-Gene-040310-3]                                                                | - | - | - | -5.757653948 | -1.323931214 | -1.921582948 | -6.354829094 |
| ENSRGLG000000017802 | -       | -                                                                                                             | - | - | - | -8.414775246 | 0.184762519  | -0.375611193 | -9.974659865 |
| ENSRGLG000000014180 | -       | -                                                                                                             | - | - | - | -4.526987904 | -0.58345807  | -0.458682439 | -4.401727126 |
| ENSRGLG000000017882 | -       | -                                                                                                             | - | - | - | -9.653975064 | -0.099059728 | -0.60770608  | -10.16150597 |
| ENSRGLG00000001728  | konk6   | potassium channel, subfamily K, member 6<br>[Source:ZFIN;Acc:ZDB-Gene-050309-213]                             | - | - | - | -3.901898763 | -0.306682945 | -1.641712441 | -4.725725354 |
| ENSRGLG00000002684  | -       | -                                                                                                             | - | - | - | -8.453807328 | -0.102997328 | -0.731862524 | -8.185213582 |
| ENSRGLG00000007062  | -       | -                                                                                                             | - | - | - | -5.339411722 | 0.743581053  | 1.543050508  | -4.539002253 |
| ENSRGLG000000016420 | elov1a  | elongation of very long chain fatty acids protein 1<br>[Source:NCBI;Gene:Acc:101157810]                       | - | - | - | -4.355785979 | 0.26621374   | -2.481065226 | -7.100988473 |
| ENSRGLG000000012387 | -       | -                                                                                                             | - | - | - | -10.6434551  | -0.999915029 | -0.724821022 | -10.3678486  |
| ENSRGLG00000002880  | -       | -                                                                                                             | - | - | - | -9.199172583 | -1.571454538 | -1.248463628 | -6.382612567 |
| ENSRGLG000000012018 | nanos3  | nanos homolog 3<br>[Source:ZFIN;Acc:ZDB-Gene-011221-1]                                                        | - | - | - | -3.1939068   | 0.019646676  | -1.432393084 | -4.645461266 |
| ENSRGLG000000014382 | cax1    | cation/H <sup>+</sup> exchanger protein 1<br>[Source:ZFIN;Acc:ZDB-Gene-030131-3044]                           | - | - | - | -6.498489327 | -0.341456723 | 1.245325449  | -4.911221976 |
| ENSRGLG00000002993  | -       | -                                                                                                             | - | - | - | -10.12675423 | -0.584628097 | -0.820115521 | -9.160175666 |
| ENSRGLG000000006896 | flp21a2 | cytochrome P450, family 21, subfamily A, polypeptide 2<br>[Source:ZFIN;Acc:ZDB-Gene-070103-6]                 | - | - | - | -5.405517682 | 0.86430965   | -11.66502921 | -17.93499217 |
| ENSRGLG00000000798  | -       | -                                                                                                             | - | - | - | -3.493345377 | -0.113107899 | -0.131067878 | -4.49618914  |
| ENSRGLG000000014808 | -       | -                                                                                                             | - | - | - | -10.16907382 | 0.426855006  | 1.848282239  | -8.74695138  |
| ENSRGLG000000006627 | -       | -                                                                                                             | - | - | - | -9.639479611 | -0.462996337 | 0.032977095  | -9.143021366 |
| ENSRGLG000000012954 | -       | -                                                                                                             | - | - | - | -4.954945783 | 0.138136996  | -0.568794065 | -6.869301914 |
| ENSRGLG000000012735 | -       | -                                                                                                             | - | - | - | -7.666933405 | 0.179240146  | 2.888889079  | -4.956800276 |
| ENSRGLG00000002928  | -       | -                                                                                                             | - | - | - | -10.53748333 | 0.007380336  | -0.927130336 | -11.4664834  |
| ENSRGLG000000013930 | furc9   | Oryzias latipes alpha3-fucosyltransferase-1e (furc9), mRNA<br>[Source:RefSeq;mRNA:NM_001163080]               | - | - | - | -4.14551312  | 0.107050091  | -0.132960951 | -5.380014271 |
| ENSRGLG000000012421 | carm3   | capring protein regulator and myosin 1 linker 3<br>[Source:ZFIN;Acc:ZDB-Gene-070912-183]                      | - | - | - | -4.698807581 | 0.072977982  | -1.440305491 | -6.208335315 |
| ENSRGLG000000005246 | -       | -                                                                                                             | - | - | - | -15.90495483 | 1.221159135  | -1.71        |              |

|  |                     |                |                                                                                                                                   |             |              |              |             |
|--|---------------------|----------------|-----------------------------------------------------------------------------------------------------------------------------------|-------------|--------------|--------------|-------------|
|  | ENSRORG0000014725   | -              | -                                                                                                                                 | 16.35809447 | 10.9445437   | 2.939740285  | 8.353765811 |
|  | ENSRORG00000005182  | -              | -                                                                                                                                 | 5.108081381 | 1.968698608  | -0.055116583 | 3.066541118 |
|  | ENSRORG00000006396  | -              | -                                                                                                                                 | 4.899620832 | -2.932573098 | -0.3100121   | 4.16266636  |
|  | ENSRORG00000017031  | hoxb13a        | homeobox B13a [Source:ZFInAcc.ZDB-GENE-050812-1]                                                                                  | 6.145051628 | -0.069145045 | -3.197172769 | 3.017508956 |
|  | ENSRORG00000002093  | -              | uncharacterized LOC101156589 [Source:NCBI gene:Acc101156589]                                                                      | 5.701632986 | 1.6455657    | -0.475120645 | 3.581431525 |
|  | ENSRORG00000001994  | -              | -                                                                                                                                 | 5.381263782 | 2.134789537  | 0.787215791  | 4.404173044 |
|  | ENSRORG000000013624 | -              | -                                                                                                                                 | 3.610882787 | 0.14856181   | 0.517486214  | 3.932920264 |
|  | ENSRORG00000007825  | dok6           | docking protein 6 [Source:ZFInAcc.ZDB-GENE-070410-50]                                                                             | 3.711027075 | -1.54028837  | 0.2782158    | 5.530017685 |
|  | ENSRORG00000007799  | st3gal7        | alpha-L-2,3-sialyltransferase ST3Gal V [Source:NCBI gene:Acc100048379]                                                            | 6.111822008 | 1.149900339  | -1.429856157 | 5.53254526  |
|  | ENSRORG000000015637 | bcan           | brevican [Source:ZFInAcc.ZDB-GENE-030131-6045]                                                                                    | 7.523252909 | 1.828851844  | 0.065057211  | 5.760216242 |
|  | ENSRORG00000006996  | hnf4g          | hepatocyte nuclear factor 4, gamma [Source:ZFInAcc.ZDB-GENE-060929-100]                                                           | 4.545062589 | -1.12973449  | -1.755285257 | 3.919986959 |
|  | ENSRORG00000004930  | MAL2           | mal, T cell differentiation protein 2 (gene/pseudogene) [Source:HGNC Symbol:HGNC:13634]                                           | 5.625256395 | 0.048516637  | -1.629732153 | 3.947492209 |
|  | ENSRORG000000015578 | ostp5          | oxysterol binding protein-like 5 [Source:ZFInAcc.ZDB-GENE-030131-5872]                                                            | 4.160125382 | 1.110324773  | 0.543766721  | 3.594052245 |
|  | ENSRORG00000006324  | -              | -                                                                                                                                 | 6.338283913 | -0.855607904 | -2.273185047 | 4.921192357 |
|  | ENSRORG000000015065 | EVPL (1 of mar | envoloplatin [Source:HGNC Symbol:HGNC:3503]                                                                                       | 4.062228207 | -1.157241399 | -2.088080786 | 3.131875577 |
|  | ENSRORG000000008534 | meis3          | myeloid ecotropic viral integration site 3 [Source:ZFInAcc.ZDB-GENE-010406-2]                                                     | 4.679158737 | 0.815296743  | -0.077086691 | 3.787269298 |
|  | ENSRORG000000011578 | -              | -                                                                                                                                 | 3.290712703 | 1.324080539  | 2.109178227  | 4.07629555  |
|  | ENSRORG000000003439 | -              | -                                                                                                                                 | 5.121077613 | -0.228624913 | -2.186516169 | 3.163288466 |
|  | ENSRORG00000007958  | dhh            | desert hedgehog [Source:ZFInAcc.ZDB-GENE-990714-5]                                                                                | 18.21155321 | 11.24588366  | -0.946570524 | 6.019682906 |
|  | ENSRORG000000006516 | -              | -                                                                                                                                 | 3.232847886 | 1.330863728  | 1.11993766   | 3.023262398 |
|  | ENSRORG00000008298  | coro1cb        | coronin-1C [Source:NCBI gene:Acc101166646]                                                                                        | 4.552440841 | 1.402394562  | 0.819698702  | 3.970221884 |
|  | ENSRORG000000004562 | hsl11b11a.l    | hydroxysteroid (11-beta) dehydrogenase 1-like A [Source:ZFInAcc.ZDB-GENE-040426-1002]                                             | 4.214008597 | -1.87031312  | 3.042885758  | 3.042885758 |
|  | ENSRORG00000001987  | -              | -                                                                                                                                 | 5.08290194  | 2.32538029   | 0.933405547  | 3.691413498 |
|  | ENSRORG000000006603 | ca15b          | carcinoembryonic antigen Xvb [Source:ZFInAcc.ZDB-GENE-040426-2222]                                                                | 4.766152526 | -0.89215619  | -1.617956646 | 4.040843179 |
|  | ENSRORG000000016465 | hxb2b          | HM homeobox 2b [Source:ZFInAcc.ZDB-GENE-051220-1]                                                                                 | 6.364049014 | 0.75644353   | -0.35564959  | 5.25457301  |
|  | ENSRORG000000012151 | pcyt2          | phosphate cytidyltransferase 2, ethanolamine [Source:ZFInAcc.ZDB-GENE-041010-132]                                                 | 5.58961542  | 1.783703817  | -0.7815844   | 3.025012145 |
|  | ENSRORG00000001929  | -              | -                                                                                                                                 | 5.328106264 | 1.555258221  | 1.208579102  | 4.981848441 |
|  | ENSRORG000000010105 | GPR21          | G protein-coupled receptor 21 [Source:HGNC Symbol:Acc:HGNC:4476]                                                                  | 5.183721482 | 2.312659048  | 0.866274423  | 3.778139304 |
|  | ENSRORG000000008150 | -              | -                                                                                                                                 | 3.987537209 | 1.338386104  | 0.978836111  | 3.628472271 |
|  | ENSRORG000000004057 | st6galnac6     | Oryza latipes ST6 N-acetylgalactosaminide alpha-2,6-sialyltransferase 6 (st6galnac6), mRNA. [Source:RefSeq mRNA:Acc:NM_001278558] | 3.896021644 | 1.014437702  | 0.586017066  | 3.468086045 |
|  | ENSRORG000000016044 | tal1           | T-cell acute lymphocytic leukemia 1 [Source:ZFInAcc.ZDB-GENE-980526-501]                                                          | 5.606613382 | -1.077560405 | -0.259302115 | 6.425347351 |
|  | ENSRORG000000021060 | -              | -                                                                                                                                 | 3.836309184 | 1.990316781  | 2.587410769  | 4.413771066 |
|  | ENSRORG000000006282 | retreg1        | reticulophagy regulator 1 [Source:ZFInAcc.ZDB-GENE-130221-1]                                                                      | 3.137156309 | 0.23572481   | 1.414067388  | 4.315981685 |
|  | ENSRORG000000014812 | -              | -                                                                                                                                 | 5.975345158 | 0.950219553  | -0.187759243 | 4.837851978 |
|  | ENSRORG000000005754 | dpep1          | dipeptidase 1 [Source:ZFInAcc.ZDB-GENE-061013-388]                                                                                | 6.278989883 | -2.246402827 | -4.637059933 | 3.888719046 |
|  | ENSRORG000000006833 | cerx5          | ceramide synthase 5 [Source:ZFInAcc.ZDB-GENE-030131-1740]                                                                         | 3.671108697 | 1.204421718  | 0.88263046   | 3.349801506 |
|  | ENSRORG000000010719 | esy2b          | extended synaptotagmin 2 [Source:NCBI gene:Acc10135352]                                                                           | 5.083511432 | 0.029813527  | 0.313528855  | 5.36771106  |
|  | ENSRORG000000006708 | ak1            | adenylyl kinase 1 [Source:NCBI gene:Acc101156342]                                                                                 | 5.010142874 | 2.579683995  | 2.96592799   | 3.99861621  |
|  | ENSRORG000000016368 | slc48a1b       | solute carrier family 48 (hematopoietic) member 1b [Source:ZFInAcc.ZDB-GENE-030131-8276]                                          | 16.98929504 | 13.72439341  | 1.411165141  | 4.656164901 |
|  | ENSRORG000000004116 | dk3b           | distal-less homeobox 3 [Source:NCBI gene:Acc101157491]                                                                            | 6.621003133 | 1.030665757  | -0.208604237 | 3.554780638 |
|  | ENSRORG000000005311 | lzc            | leucine zipper and CTNBP1 domain containing [Source:NCBI gene:Acc101174666]                                                       | 3.599555757 | 1.722576759  | 1.543568133  | 3.421031928 |
|  | ENSRORG000000010864 | gda            | guanine deaminase [Source:ZFInAcc.ZDB-GENE-09592-484]                                                                             | 4.159274197 | -0.575120679 | -1.455648115 | 3.279231296 |
|  | ENSRORG000000013613 | -              | -                                                                                                                                 | 5.055785522 | 0.185482213  | -0.351301874 | 4.519488639 |
|  | ENSRORG000000016129 | -              | -                                                                                                                                 | 4.291673582 | 1.529555275  | 1.567843897  | 4.33046007  |
|  | ENSRORG000000005008 | baip3          | BAI1-associated protein 3 [Source:ZFInAcc.ZDB-GENE-130530-863]                                                                    | 8.567626895 | 3.802542307  | 1.083296176  | 5.848848107 |
|  | ENSRORG000000016841 | slpr3a         | sclerosin-1, phosphate receptor 3a [Source:ZFInAcc.ZDB-GENE-050208-347]                                                           | 5.894660301 | 0.937251905  | 2.29956843   | 7.217455902 |
|  | ENSRORG000000000224 | -              | -                                                                                                                                 | 3.435806834 | -0.036184867 | 0.567212789  | 4.039698992 |
|  | ENSRORG000000006465 | -              | -                                                                                                                                 | 3.166278347 | 0.00686148   | 0.564207277  | 3.724108867 |
|  | ENSRORG000000011642 | -              | -                                                                                                                                 | 6.074389403 | 2.011957275  | -0.551243004 | 3.511676661 |
|  | ENSRORG000000012256 | -              | -                                                                                                                                 | 16.30804094 | 13.73126493  | 3.268222921  | 3.686222921 |
|  | ENSRORG000000013126 | -              | -                                                                                                                                 | 6.323118986 | 2.450820428  | -0.176028987 | 3.696745424 |
|  | ENSRORG000000009310 | rundc3b        | RUN domain containing 3b [Source:ZFInAcc.ZDB-GENE-041114-121]                                                                     | 3.571134153 | -0.255003663 | 0.250098678  | 3.834711097 |
|  | ENSRORG000000003438 | pp6r11b        | protein phosphatase 1 regulatory subunit 1B [Source:NCBI gene:Acc101189557]                                                       | 3.837517642 | 1.122826086  | 0.618911655  | 3.33048808  |
|  | ENSRORG000000003493 | SLC6A20        | solute carrier family 6 member 20 [Source:HGNC Symbol:Acc:HGNC:30927]                                                             | 5.723087309 | 0.334877103  | -1.425536612 | 3.965315962 |
|  | ENSRORG000000004982 | cd82b          | CD82 molecule B [Source:ZFInAcc.ZDB-GENE-030131-2857]                                                                             | 3.952132247 | 0.956793866  | 0.35662452   | 3.364647583 |
|  | ENSRORG000000007185 | sl-dkcyf.36r.3 | sl-dkcyf.36r.3 [Source:ZFInAcc.ZDB-GENE-131127-1]                                                                                 | 3.177445789 | 1.16383363   | 2.239634314  | 4.254791158 |
|  | ENSRORG000000011370 | lam10zbb       | family with sequence similarity 10Z, member B, b [Source:ZFInAcc.ZDB-GENE-041014-330]                                             | 4.885448606 | 1.413258711  | 1.211133012  | 4.684102059 |
|  | ENSRORG000000010630 | bcn2b          | beta-carotene 15, 15'-dioxygenase 2, like [Source:ZFInAcc.ZDB-GENE-010509-11]                                                     | 4.579320041 | -0.069475705 | 0.22969674   | 4.94618804  |
|  | ENSRORG000000010376 | tz45           | -                                                                                                                                 | 6.580986999 | -1.077740004 | -1.648832792 | 6.10337417  |
|  | ENSRORG000000006634 | cdn15a         | claudin-15 [Source:NCBI gene:Acc101168738]                                                                                        | 6.119043155 | -1.470014406 | -3.901173449 | 3.688367418 |
|  | ENSRORG000000003331 | ret4a1a        | reticulon 4 receptor-like 1a [Source:ZFInAcc.ZDB-GENE-091118-38]                                                                  | 5.545997489 | 2.173594081  | -0.164074003 | 3.20881472  |

|                       |                     |                     |                                                                                                                        |                                                       |   |   |               |              |              |               |
|-----------------------|---------------------|---------------------|------------------------------------------------------------------------------------------------------------------------|-------------------------------------------------------|---|---|---------------|--------------|--------------|---------------|
|                       | ENSRORG00000007533  | -                   | -                                                                                                                      | -                                                     | - | - | -9.594415625  | -1.413278467 | -1.225730645 | -9.40638314   |
|                       | ENSRORG000000006629 | -                   | -                                                                                                                      | -                                                     | - | - | -10.016505088 | -0.19795933  | 1.247835586  | -8.570370422  |
|                       | ENSRORG000000012399 | slc9a2              | solute carrier family 9, subfamily A (NHE3, cation proton antiporter 2), member 2 [Source:ZFInAcc.ZDB-GENE-070912-541] | -                                                     | - | - | -3.234932065  | -0.226686487 | -0.439460279 | -3.440738799  |
|                       | ENSRORG000000009853 | -                   | -                                                                                                                      | -                                                     | - | - | -10.24611422  | -0.627980141 | -0.125265011 | -9.492384078  |
|                       | ENSRORG000000008845 | -                   | -                                                                                                                      | -                                                     | - | - | -10.155245464 | -0.561134137 | -0.983681083 | -10.57730799  |
|                       | ENSRORG000000009497 | baip21b             | BAI1-associated protein 2-like 1b [Source:ZFInAcc.ZDB-GENE-050417-371]                                                 | -                                                     | - | - | -3.136133634  | -0.654428068 | -0.590290121 | -3.071429761  |
|                       | ENSRORG000000008843 | lpg                 | lipase G, endothelial type [Source:HGNC Symbol:Acc:HGNC:8623]                                                          | -                                                     | - | - | -6.126308361  | -0.792738871 | -1.553469423 | -3.779615238  |
|                       | ENSRORG000000000419 | -                   | Oryza latipes uncharacterized LOC10049343 (LOC10049343), mRNA. [Source:RefSeq mRNA:Acc:NM_0011045737]                  | -                                                     | - | - | -10.08587163  | -1.121728874 | -1.288004144 | -10.25166424  |
|                       | ENSRORG00000001680  | bin1b               | bridging integrator 1b [Source:ZFInAcc.ZDB-GENE-030426-1]                                                              | -                                                     | - | - | -5.265944644  | -0.734478777 | -0.738447147 | -5.271427119  |
|                       | ENSRORG000000013236 | GRMB (1             | glutamate metabotropic receptor 8 [Source:HGNC Symbol:Acc:HGNC:4600]                                                   | -                                                     | - | - | -4.708560902  | -1.534551736 | -1.163908114 | -4.337432331  |
|                       | ENSRORG000000012249 | sich211             | Oryza latipes ZPC domain containing protein 1 (LOC10049333), mRNA. [Source:RefSeq mRNA:Acc:NM_001104748]               | -                                                     | - | - | -10.09207054  | -0.17605094  | -0.366206796 | -10.28247029  |
|                       | ENSRORG000000011634 | -                   | -                                                                                                                      | -                                                     | - | - | -4.02870594   | -0.45106506  | -1.829984283 | -5.407148912  |
|                       | ENSRORG000000001875 | -                   | -                                                                                                                      | -                                                     | - | - | -20.43907475  | 0.606993296  | 0            | -21.04607459  |
|                       | ENSRORG000000017570 | vttn                | vertebrate development associated [Source:ZFInAcc.ZDB-GENE-060929-700]                                                 | -                                                     | - | - | -8.45545938   | -0.84221788  | -1.178131062 | -8.79087887   |
|                       | ENSRORG000000013331 | -                   | -                                                                                                                      | -                                                     | - | - | -3.553929881  | -1.175800287 | -1.263372235 | -3.639974722  |
|                       | ENSRORG000000007271 | -                   | uncharacterized LOC101161254 [Source:NCBI gene:Acc101161254]                                                           | -                                                     | - | - | -9.948759412  | -0.157140915 | -0.612290722 | -10.40347397  |
|                       | ENSRORG000000015701 | frt86               | fibrin(ogen) family member 86 [Source:ZFInAcc.ZDB-GENE-060929-108]                                                     | -                                                     | - | - | -8.19266813   | 1.586013847  | -1.831712809 | -12.611511197 |
|                       | ENSRORG000000010910 | -                   | -                                                                                                                      | -                                                     | - | - | -3.052882675  | -0.270863438 | -0.841770293 | -3.623254373  |
|                       | ENSRORG000000004414 | -                   | -                                                                                                                      | -                                                     | - | - | -9.43011935   | -0.08232142  | -0.78519281  | -10.13243358  |
|                       | ENSRORG000000017482 | -                   | -                                                                                                                      | -                                                     | - | - | -9.97538608   | -0.175497568 | -2.206552433 | -12.00595651  |
|                       | ENSRORG000000003742 | -                   | -                                                                                                                      | -                                                     | - | - | -4.589728119  | -0.00836525  | 0.566329393  | -4.023075392  |
|                       | ENSRORG000000014048 | phex                | phosphate regulating endopeptidase homolog, X-linked [Source:ZFInAcc.ZDB-GENE-030103-21]                               | -                                                     | - | - | -5.500050322  | -0.722688846 | -0.476888846 | -5.253765325  |
|                       | ENSRORG000000009603 | sl-dkcyf.7          | sl-dkcyf.7h12.2 [Source:ZFInAcc.ZDB-GENE-030131-7512]                                                                  | -                                                     | - | - | -4.125876463  | -0.628358823 | -0.538018296 | -4.035023795  |
|                       | ENSRORG000000013462 | -                   | -                                                                                                                      | -                                                     | - | - | -4.251077514  | 1.184218529  | 1.200472052  | -4.234392371  |
|                       | ENSRORG000000016320 | zpc-16301           | zpc-16301.4 [Source:ZFInAcc.ZDB-GENE-070424-100]                                                                       | -                                                     | - | - | -8.065784949  | 0.057760316  | 1.489465031  | -6.635386695  |
|                       | ENSRORG000000004262 | olp219-1            | oligomeric receptor family H, subfamily 129, member 1 [Source:NCBI gene:Acc107086-19]                                  | -                                                     | - | - | -4.989887841  | -0.252678288 | -1.201549177 | -3.53512535   |
|                       | ENSRORG000000014593 | anepcb              | alaninyl (membrane) aminopeptidase b [Source:ZFInAcc.ZDB-GENE-030131-1233]                                             | -                                                     | - | - | -5.132565337  | 1.314123057  | -0.185338791 | -6.631545875  |
| HmO VS WtO HmT VS WtT | 6                   | ENSRORG000000005260 | -                                                                                                                      | -                                                     | - | - | -0.400130202  | -3.585081279 | -6.676083042 | -3.490645407  |
|                       | ENSRORG000000014988 | abcc12              | ATP-binding cassette, sub-family C (CFTR/MRP), member 12 [Source:ZFInAcc.ZDB-GENE-050517-25]                           | -                                                     | - | - | 1.160933398   | -4.769157066 | -3.442396961 | 1.587897364   |
|                       | ENSRORG000000006472 | psk2                | proprionin convertase subtilisin/kexin type 2 [Source:NCBI gene:Acc10049241]                                           | -                                                     | - | - | 0.538362419   | -3.814218629 | -3.201209435 | 1.20717667    |
|                       | ENSRORG000000012518 | tdsl1               | thrombospondin 1 [Source:NCBI gene:Acc101171788]                                                                       | -                                                     | - | - | 7.806815748   | -4.875598867 | -8.800271975 | 5.882629206   |
|                       | ENSRORG000000011217 | metll1              | metalloproteinase 32f [Source:ZFInAcc.ZDB-GENE-050309-40]                                                              | -                                                     | - | - | 6.693780305   | -4.17597292  | -8.739369737 | 4.076545446   |
| HmT VS HmO HmT VS WtT | 22                  | ENSRORG000000007164 | cdn15a                                                                                                                 | actin, clone 302-like [Source:NCBI gene:Acc101156021] | - | - | -0.938893586  | -0.811237474 | -3.166726287 | -3.293897556  |
|                       | ENSRORG000000012552 | -                   | -                                                                                                                      | -                                                     | - | - | 3.867797168   | 3.030956052  | -4.227702634 | -3.390375485  |
|                       | ENSRORG000000003500 | frem1b              |                                                                                                                        |                                                       |   |   |               |              |              |               |

|  |                     |                |                                                                                                              |             |              |              |             |
|--|---------------------|----------------|--------------------------------------------------------------------------------------------------------------|-------------|--------------|--------------|-------------|
|  | ENSRORL00000001941  | si.ch211-133q  | keratin, type I cytoskeletal 18 [Source:NCBI gene:Acc:101169203]                                             | 5.083710674 | -0.820399393 | -2.117504157 | 3.787090871 |
|  | ENSRORL00000017347  | ctsbp          | cathespain 8b [Source:ZFIN;Acc.ZDB-GENE-070323-1]                                                            | 7.245990685 | -15.34165433 | -6.161384958 | 16.42676941 |
|  | ENSRORL00000014777  |                |                                                                                                              | 5.320272695 | 2.180165388  | 0.965025175  | 4.105626965 |
|  | ENSRORL00000008922  | tepa           | tesolatin a [Source:ZFIN;Acc.ZDB-GENE-040476-2832]                                                           | 5.418448613 | -0.937278821 | -1.869921104 | 4.142735291 |
|  | ENSRORL00000008371  | RAB3A (1 of m) | RAB3A member RAS oncogene family [Source:HGNC Symbol;Acc.HGNC:9777]                                          | 4.549163702 | 1.131589865  | 0.222379639  | 3.641857609 |
|  | ENSRORL00000005050  | evx1           | even-skipped homolog 1 [Source:NCBI gene:Acc:10189314]                                                       | 5.941006278 | 0.193742706  | -1.937810306 | 3.21615381  |
|  | ENSRORL00000014025  | rhr2           | thyrotropin releasing hormone receptor 2 [Source:ZFIN;Acc.ZDB-GENE-050419-193]                               | 16.49967603 | 11.48159764  | 0.304306433  | 5.322856333 |
|  | ENSRORL00000014934  | stbtp4         | synatan binding protein 4 [Source:ZFIN;Acc.ZDB-GENE-110420-5]                                                | 3.770016851 | -0.037746052 | 0.220375389  | 4.028625843 |
|  | ENSRORL00000010744  | S100P          | S100 calcium binding protein P [Source:HGNC Symbol;Acc.HGNC:10504]                                           | 6.059095975 | 1.913854099  | -0.712197339 | 3.433492794 |
|  | ENSRORL00000001347  | dhfr7c         | protein NATD1 [Source:NCBI gene:Acc:101165146]                                                               | 5.503397753 | 2.186628488  | 1.25806773   | 3.425222303 |
|  | ENSRORL00000015795  | sidkey-246g23  | sidkey-246g23 [Source:ZFIN;Acc.ZDB-GENE-050419-100]                                                          | 3.148539157 | 1.106303874  | 1.362375792  | 3.40507753  |
|  | ENSRORL00000004788  | oparg1a        | peroxisome proliferator-activated receptor gamma, coactivator 1 alpha [Source:ZFIN;Acc.ZDB-GENE-080505-1]    | 5.857486152 | -1.218823043 | -3.002275632 | 4.07451885  |
|  | ENSRORL00000001057  | ryr1b          | ryanodine receptor 1b (skeletal) [Source:ZFIN;Acc.ZDB-GENE-070705-417]                                       | 3.060628446 | 0.30381570   | 0.91184192   | 3.66914957  |
|  | ENSRORL00000005076  | asef           | RAS and EF-hand domain containing [Source:ZFIN;Acc.ZDB-GENE-081105-157]                                      | 3.657441249 | 1.495200476  | 1.872736182  | 4.035482392 |
|  | ENSRORL00000007222  | si.ch211-212k  | cyclin b1 interacting protein 1 [Source:HGNC Symbol;Acc.HGNC:19437]                                          | 4.563558184 | 0.794161052  | 1.24473675   | 5.014619251 |
|  | ENSRORL000000015157 | SLS (1 of m)   | oligomannanase [Source:HGNC Symbol;Acc.HGNC:43311]                                                           | 3.768283034 | 0.989037463  | 0.606452544  | 3.386182527 |
|  | ENSRORL00000002184  | inha           | inhibin, alpha [Source:ZFIN;Acc.ZDB-GENE-060503-554]                                                         | 18.66155356 | 12.94180325  | 0.466898003  | 6.187118658 |
|  | ENSRORL00000012622  | fatp6          | fatty acid binding protein 6, ileal (gastrotropin) [Source:ZFIN;Acc.ZDB-GENE-040625-491]                     | 3.293933031 | -1.620051972 | -1.438934161 | 3.475535673 |
|  | ENSRORL00000015770  | upc1           | beta-ubiquitin protease 1 [Source:NCBI gene:Acc:101160078]                                                   | 5.005558595 | 0.499344079  | -1.34876011  | 3.157932063 |
|  | ENSRORL00000015777  | spic           | Sp1-C transcription factor (Sp1-1/P1) 1 related [Source:ZFIN;Acc.ZDB-GENE-040912-47]                         | 5.353442983 | -0.96107441  | -0.923710956 | 5.391238906 |
|  | ENSRORL00000005876  | eps8b3         | EPS8-like 3b [Source:ZFIN;Acc.ZDB-GENE-040426-2]                                                             | 5.300359556 | -0.429308078 | -2.594746453 | 3.130489665 |
|  | ENSRORL00000006407  |                |                                                                                                              | 1.917404188 | 3.300353479  | 0.984953516  | 6.68912102  |
|  | ENSRORL00000010661  | si.ch73-206p6  | si.ch73-206p6 1 [Source:ZFIN;Acc.ZDB-GENE-030131-5048]                                                       | 3.614404009 | 1.138892235  | 2.091985434  | 4.567963006 |
|  | ENSRORL00000016173  | hes6           | Hes3 [Source:NCBI gene:Acc:10049437]                                                                         | 3.667584148 | -0.358403533 | 7.438772489  | 4.466272804 |
|  | ENSRORL00000002963  |                |                                                                                                              | 3.577444912 | 1.096328605  | 1.563346692  | 4.045480075 |
|  | ENSRORL00000005683  | hfnna          | lin 2b mutation factor 4 [Source:ZFIN;Acc.ZDB-GENE-111031-2]                                                 | 3.824214602 | -0.432223967 | -1.432223967 | 4.74700962  |
|  | ENSRORL00000016500  | cah            | phenylalanine hydroxylase [Source:ZFIN;Acc.ZDB-GENE-031006-2]                                                | 6.256677088 | 1.709037809  | 0.027773239  | 4.575896099 |
|  | ENSRORL00000006249  | PPM1L          | protein phosphatase, Mg <sup>2+</sup> /Mn <sup>2+</sup> dependent 1L [Source:HGNC Symbol;Acc.HGNC:18381]     | 4.912037744 | 2.224567003  | 1.910817068  | 4.589773978 |
|  | ENSRORL00000003585  | cdt3l1p1       | proximal tubules-expressed gene protein [Source:NCBI gene:Acc:101163403]                                     | 4.860851627 | -0.238904495 | -4.320956377 | 5.9256377   |
|  | ENSRORL00000017877  | agz2           | protein jagged 2 [Source:NCBI gene:Acc:101163046]                                                            | 6.000840028 | 2.030739392  | 0.873930319  | 3.146589802 |
|  | ENSRORL00000010913  |                |                                                                                                              | 3.669618127 | 0.089089998  | 1.228099012  | 4.809101955 |
|  | ENSRORL00000006000  | znf618         | zinc finger protein 618 [Source:ZFIN;Acc.ZDB-GENE-030131-2053]                                               | 3.813803498 | 0.824156975  | 3.40214131   | 3.303045614 |
|  | ENSRORL00000000769  |                |                                                                                                              | 3.630994008 | 0.509173762  | 0.188627239  | 3.310928605 |
|  | ENSRORL00000017589  | ostp6          | oysteroid binding protein-like 6 [Source:ZFIN;Acc.ZDB-GENE-070912-206]                                       | 3.922207679 | 1.251049006  | 0.492634666  | 3.164278612 |
|  | ENSRORL00000012951  | ptpdc1a        | protein tyrosine phosphatase domain containing 1a [Source:ZFIN;Acc.ZDB-GENE-070112-632]                      | 3.536629221 | 0.747058655  | 0.986177851  | 3.776238987 |
|  | ENSRORL00000004742  | aldob          | fructose-bisphosphate aldolase B [Source:NCBI gene:Acc:10049273]                                             | 5.79557142  | 0.814688112  | -1.830087514 | 3.151286366 |
|  | ENSRORL00000007130  | cyp11a2        | cytochrome P450, family 11, subfamily A, polypeptide 2 [Source:ZFIN;Acc.ZDB-GENE-130911-1]                   | 4.957579322 | 3.127808106  | 1.44421076   | 3.271676363 |
|  | ENSRORL0000001967   |                |                                                                                                              | 8.206844358 | 2.446241125  | -1.744828714 | 2.48625337  |
|  | ENSRORL00000013056  | papp2a         | pappalysin 2 [Source:ZFIN;Acc.ZDB-GENE-070912-525]                                                           | 6.038522294 | 2.676060258  | 1.358407003  | 4.721347502 |
|  | ENSRORL00000009092  | cdh11          | catenin (CDC2-related kinase)-like 1 [Source:ZFIN;Acc.ZDB-GENE-040808-34]                                    | 5.384012014 | 1.890678298  | 0.277815756  | 3.176134703 |
|  | ENSRORL00000016621  |                |                                                                                                              | 4.014070601 | -0.293139994 | 2.416782764  | 6.724489891 |
|  | ENSRORL00000005049  | rad            | Ras-related associated with diabetes [Source:ZFIN;Acc.ZDB-GENE-030131-5607]                                  | 4.047415884 | 0.09670509   | -0.809774426 | 3.141416695 |
|  | ENSRORL00000004882  | ftjpa          | recombination signal binding protein for immunoglobulin kappa J region a [Source:ZFIN;Acc.ZDB-GENE-031117-1] | 3.558026951 | 0.841710685  | 0.535034911  | 3.5183515   |
|  | ENSRORL00000009144  | msh5           | msh5 homolog 5 [Source:ZFIN;Acc.ZDB-GENE-131127-630]                                                         | 5.854546426 | 3.988885505  | 2.66980941   | 4.535522696 |
|  | ENSRORL00000014711  |                |                                                                                                              | 16.72684651 | 13.30642203  | 1.211488521  | 4.632380358 |
|  | ENSRORL00000004153  | DMRTA1         | DMRT like family A1 [Source:HGNC Symbol;Acc.HGNC:13878]                                                      | 4.83367102  | -0.034872655 | 0.530768072  | 5.39979695  |
|  | ENSRORL00000003999  | hxb8           | lim homeobox 8b [Source:ZFIN;Acc.ZDB-GENE-081105-1531]                                                       | 5.775389857 | 0.911265876  | -0.30180799  | 4.565252034 |
|  | ENSRORL00000018833  | hnmnpd         | heterogeneous nuclear ribonucleoprotein D [Source:ZFIN;Acc.ZDB-GENE-070424-97]                               | 3.1025592   | 0.973434447  | 1.55166695   | 3.681278801 |
|  | ENSRORL00000017606  |                |                                                                                                              | 3.694149602 | -0.705486172 | -0.852644712 | 3.547475724 |
|  | ENSRORL00000007030  | shfb1          | slingshot protein phosphatase 1b [Source:ZFIN;Acc.ZDB-GENE-030131-5909]                                      | 5.288496972 | 0.068318362  | -2.008512617 | 3.212144812 |
|  | ENSRORL00000009208  | gad1b          | glutamate decarboxylase 1 [Source:NCBI gene:Acc:101168897]                                                   | 4.76843066  | 0.874038004  | 0.874038004  | 3.76909111  |
|  | ENSRORL00000002960  | arf5c          | ADP-ribosylation factor-like 5C [Source:ZFIN;Acc.ZDB-GENE-040426-186]                                        | 4.922840009 | 0.981730718  | 1.257825186  | 5.19941949  |
|  | ENSRORL00000002960  | arf5c          | ADP-ribosylation factor-like 5C [Source:ZFIN;Acc.ZDB-GENE-040426-186]                                        | 4.420334066 | 2.574724366  | 1.79027596   | 3.636386446 |
|  | ENSRORL00000012296  | prp15b         | proline rich 15-like b [Source:ZFIN;Acc.ZDB-GENE-050417-201]                                                 | 3.568146582 | 0.617051437  | -0.030000969 | 3.31570373  |
|  | ENSRORL00000012972  | pkfb2a         | 6-phosphofructo-2-kinase/fructose-2,6-bisphosphatase 2a [Source:ZFIN;Acc.ZDB-GENE-040426-366]                | 3.805444613 | 1.233000116  | 1.360963815  | 3.937892501 |
|  | ENSRORL00000006042  | pygma          | glycogen phosphorylase, muscle form [Source:NCBI gene:Acc:101169133]                                         | 7.115227007 | 3.079098298  | -0.117102197 | 3.864893294 |
|  | ENSRORL00000000300  | si.ch211-239g  | ectopic viral integration site 5 [Source:HGNC Symbol;Acc.HGNC:30464]                                         | 3.659401963 | 1.274359137  | 2.621664704  | 5.007189931 |
|  | ENSRORL00000003016  |                |                                                                                                              | 7.367927126 | 3.798848539  | 0.107544714  | 3.67132432  |
|  | ENSRORL00000008889  | cdh17          | cadherin 17, U cadherin (liver-intestine) [Source:ZFIN;Acc.ZDB-GENE-030910-3]                                | 4.29726792  | -0.500214587 | -1.11286718  | 3.685099891 |
|  | ENSRORL00000016364  | CDKL5 (1 of m) | cyclin dependent kinase like 5 [Source:HGNC Symbol;Acc.HGNC:11411]                                           | 3.26207672  | -0.706800807 | 1.156148901  | 5.124678298 |
|  | ENSRORL00000014773  | si.ch211-225g  | si.ch211-225g 2 [Source:ZFIN;Acc.ZDB-GENE-091204-283]                                                        | 3.376575066 | 0.738690816  | 1.805299424  | 4.446487373 |
|  | ENSRORL0000000897   | nfa2a          | neurofibromin 2 (merin) [Source:ZFIN;Acc.ZDB-GENE-080722-7]                                                  | 3.706971513 | 1.392895145  | 1.499496044  | 3.814057232 |

|  |                    |            |                                                                                                     |   |              |              |              |              |
|--|--------------------|------------|-----------------------------------------------------------------------------------------------------|---|--------------|--------------|--------------|--------------|
|  | ENSRORL00000012498 | -          | uncharacterized LOC101156019 [Source:NCBI gene:Acc:101156019]                                       | - | -3.421001291 | 1.193838602  | 2.991919152  | -1.622435767 |
|  | ENSRORL00000016956 | dnajc17    | DnaJ heat shock protein family (Hsp40) member C17 [Source:NCBI gene:Acc:101171293]                  | - | -3.877991568 | -0.331539898 | 3.714203628  | 0.18826788   |
|  | ENSRORL00000007002 | -          |                                                                                                     | - | 17.53162735  | 1.9129487    | 18.51743305  | 0.935626688  |
|  | ENSRORL00000002314 | -          |                                                                                                     | - | -5.482419399 | 0.7792066    | 5.494053695  | -0.746611732 |
|  | ENSRORL00000005034 | palpnl1    | poly(A) binding protein, nuclear 1-like (cytoplasmic) [Source:ZFIN;Acc.ZDB-GENE-080709-5]           | - | -3.781245937 | -1.560367859 | 2.806636255  | 0.586300988  |
|  | ENSRORL00000007402 | sm6        | LSM6 homolog, U6 small nuclear RNA and mRNA degradation associated [Source:NCBI gene:Acc:101156271] | - | -5.440375745 | -0.669178675 | 4.255132761  | -0.515588247 |
|  | ENSRORL00000004861 | -          |                                                                                                     | - | -4.497950031 | -2.301790813 | -0.443368673 | -2.639043189 |
|  | ENSRORL00000009910 | cox7c      | Cytochrome c oxidase, subunit VIIc [Source:ZFIN;Acc.ZDB-GENE-030313-8062]                           | - | -3.088687754 | 1.678752451  | 5.344233678  | 0.579278972  |
|  | ENSRORL00000004629 | bxnd17     | thioredoxin domain containing 17 [Source:NCBI gene:Acc:101163188]                                   | - | -4.266105383 | 2.225371642  | 5.379858717  | -1.1113327   |
|  | ENSRORL00000006329 | -          |                                                                                                     | - | -5.07325438  | -0.106827668 | 4.283578745  | -0.679607708 |
|  | ENSRORL00000010961 | cdc16      | cell division cycle 16 homolog (5 cerevisiae) [Source:ZFIN;Acc.ZDB-GENE-051113-132]                 | - | -3.211639219 | -0.568607895 | 2.513705037  | -0.128795977 |
|  | ENSRORL00000007693 | -          |                                                                                                     | - | -3.03337667  | 0.246764117  | 2.867486157  | -0.412169229 |
|  | ENSRORL00000013983 | tmem18     | transmembrane protein 18 [Source:NCBI gene:Acc:101158989]                                           | - | -4.419316808 | 1.194346852  | 1.564487672  | -1.048667640 |
|  | ENSRORL00000002783 | polr2k     | RNA polymerase I subunit K [Source:NCBI gene:Acc:101167378]                                         | - | -6.641961003 | 1.93150664   | 6.088748836  | -0.48394168  |
|  | ENSRORL00000016404 | -          |                                                                                                     | - | -3.533667694 | 1.049863634  | 5.077458094  | 0.844410868  |
|  | ENSRORL00000007998 | ktl2       | KTL2 chromatin associated homolog [Source:ZFIN;Acc.ZDB-GENE-060825-174]                             | - | -4.674209497 | 1.132987499  | 4.571918983  | -1.230814909 |
|  | ENSRORL00000007176 | rad18      | RAD18 E3 ubiquitin protein ligase [Source:ZFIN;Acc.ZDB-GENE-040426-745]                             | - | -3.603209153 | -0.0947212   | 4.293021597  | 0.7850188    |
|  | ENSRORL00000007818 | tmem192    | transmembrane protein 192 [Source:ZFIN;Acc.ZDB-GENE-040426-2254]                                    | - | -3.541113791 | 0.428932258  | 3.307314489  | -0.662287493 |
|  | ENSRORL00000012689 | mtf3       | mitochondrial transcription termination factor 3 [Source:ZFIN;Acc.ZDB-GENE-040719-359]              | - | -3.799622876 | 1.168929142  | 3.999993225  | -0.9607345   |
|  | ENSRORL00000010947 | -          |                                                                                                     | - | -4.40797009  | -0.071653883 | 6.085178245  | 1.499929731  |
|  | ENSRORL00000017050 | srp14      | signal recognition particle 14 [Source:NCBI gene:Acc:101172543]                                     | - | -3.328029892 | 1.238000393  | 2.458586633  | -2.106958904 |
|  | ENSRORL00000006153 | si.ch211-1 | chromosome 9 C12orf65 homolog [Source:NCBI gene:Acc:101159678]                                      | - | -4.077542189 | 1.084750346  | 4.87480363   | -0.28706408  |
|  | ENSRORL00000011747 | -          |                                                                                                     | - | -5.43861882  | -0.432826354 | 5.085723641  | 0.038916889  |
|  | ENSRORL00000015759 | -          |                                                                                                     | - | -4.72947035  | 0.319353172  | 2.602944738  | 1.943424279  |
|  | ENSRORL00000008477 | -          |                                                                                                     | - | -3.336813929 | -1.30321577  | 0.034232711  | -1.998448489 |
|  | ENSRORL00000006566 | atp13a1    | ATPase 13A1 [Source:ZFIN;Acc.ZDB-GENE-040426-2804]                                                  | - | -3.48757757  | -1.13670     |              |              |

|                          |                     |               |                                                                                                                                              |              |              |              |              |
|--------------------------|---------------------|---------------|----------------------------------------------------------------------------------------------------------------------------------------------|--------------|--------------|--------------|--------------|
|                          | ENSRORG0000000062   | -             | -                                                                                                                                            | 3.487234353  | -0.446998253 | -0.639586149 | 3.296149535  |
|                          | ENSRORG0000003401   | zhha15        | basic helix-loop-helix family, member a15 [Source:ZFIN;Acc:ZDB-GENE-070803-3]                                                                | 5.164599861  | 0.851488496  | 0.243852547  | 4.557444215  |
|                          | ENSRORG0000001735   | LOX           | lysyl oxidase [Source:HGNC Symbol;Acc:HGNC:6664]                                                                                             | 7.894489265  | 3.038647677  | -1.052106688 | 3.804232929  |
|                          | ENSRORG00000009230  | apl3a3        | adaptor-related protein complex 1, sigma 3 subunit, a [Source:ZFIN;Acc:ZDB-GENE-050417-222]                                                  | 4.829129191  | -11.84670831 | -0.914053683 | 15.76594389  |
|                          | ENSRORG0000000389   | slca47        | serine rich repeat 4, coiled-coil domain containing cotransporter, member 7 [Source:ZFIN;Acc:ZDB-GENE-050417-222]                            | 8.14537328   | 0.521988302  | 0.862140799  | 4.154274036  |
|                          | ENSRORG00000009145  | ahcg2b        | ATP-binding cassette, sub-family G (WHITE), member 2b [Source:ZFIN;Acc:ZDB-GENE-050517-36]                                                   | 4.33908395   | -1.206829308 | -1.857534924 | 3.690667332  |
|                          | ENSRORG00000011364  | kctd12.1      | potassium channel tetramerization domain containing 12 [Source:NCBI gene;Acc:101161445]                                                      | 6.314832092  | 2.420725061  | 2.032067283  | 5.926651631  |
|                          | ENSRORG00000021618  | mbnl2         | keratin, type I cytoskeletal 13 [Source:NCBI gene;Acc:101159648]                                                                             | 4.72018178   | 0.099134457  | -1.312798635 | 3.66570001   |
|                          | ENSRORG00000021780  | ND6           | NAADH dehydrogenase subunit 6 [Source:NCBI gene;Acc:875426]                                                                                  | 4.058187911  | 0.252550894  | -0.709006903 | 3.097084894  |
|                          | ENSRORG00000005419  | mbnl2         | muscleblind-like splicing regulator 2 [Source:ZFIN;Acc:ZDB-GENE-030313-9582]                                                                 | 4.845858249  | 1.302772434  | 0.413792925  | 3.957362823  |
|                          | ENSRORG00000001544  | -             | -                                                                                                                                            | 4.262076501  | 1.148768118  | 0.573263411  | 3.687056346  |
|                          | ENSRORG00000010480  | syn11c1       | cytochrome P450, family 11, subfamily C, polypeptide 1 [Source:ZFIN;Acc:ZDB-GENE-070828-1]                                                   | 19.6281402   | 10.50162823  | -0.897688316 | 8.229315388  |
|                          | ENSRORG00000011966  | -             | -                                                                                                                                            | 15.73800805  | 11.97938958  | 0.221908813  | 3.980544227  |
|                          | ENSRORG00000001355  | -             | -                                                                                                                                            | 4.713809708  | 1.815474585  | 0.93332189   | 3.832151777  |
|                          | ENSRORG00000005667  | -             | -                                                                                                                                            | 5.455335951  | 2.542395447  | 0.835456998  | 3.748990301  |
|                          | ENSRORG000000014951 | -             | -                                                                                                                                            | 3.859894769  | 0.439661216  | 2.319510658  | 5.64028831   |
|                          | ENSRORG00000005623  | czd1.1        | CUB and zona pellucida-like domains 1, tandem duplicate 1 [Source:ZFIN;Acc:ZDB-GENE-131122-16]                                               | 4.097871618  | -13.2230018  | -1.631488534 | 15.68992046  |
|                          | ENSRORG00000001933  | tex11         | testis expressed 11 [Source:ZFIN;Acc:ZDB-GENE-140415-11]                                                                                     | 5.187895818  | 1.612997714  | 2.689077048  | 6.26444928   |
|                          | ENSRORG00000001276  | fox11         | Oryzae latipes forkhead box 11 [fox11] mRNA [Source:RefSeq mRNA;Acc:NM_00160461]                                                             | 16.5506222   | 11.65322576  | 2.075103676  | 6.972969259  |
|                          | ENSRORG00000007473  | slca2a1b      | solute carrier family 2 (facilitated glucose transporter), member 1b [Source:ZFIN;Acc:ZDB-GENE-090915-1]                                     | 4.699783725  | 1.011046403  | 0.011113444  | 3.520336524  |
|                          | ENSRORG00000002518  | ctf1          | cathenin 1 [Source:NCBI gene;Acc:101117189]                                                                                                  | 7.806815748  | -4.875599867 | -6.800213975 | 5.882629206  |
|                          | ENSRORG00000009509  | sema3e        | sema domain, immunoglobulin domain (Ig), short basic domain, secreted (semaphorin) 3E [Source:ZFIN;Acc:ZDB-GENE-030313-7864]                 | 5.835118334  | 2.613054531  | 0.669905018  | 3.892451114  |
|                          | ENSRORG000000015025 | -             | -                                                                                                                                            | 3.485634941  | -0.243537694 | -0.363523073 | 3.36594544   |
|                          | ENSRORG00000007539  | pad2 (1 of 2) | peptidyl arginine deiminase, type II [Source:ZFIN;Acc:ZDB-GENE-031116-67]                                                                    | 3.081228956  | -0.941421157 | -0.028534727 | 3.994597902  |
|                          | ENSRORG000000012126 | lhdc8a        | ketch domain containing 8A [Source:ZFIN;Acc:ZDB-GENE-120810-3]                                                                               | 5.292763849  | 1.812343408  | 0.67878948   | 4.158782756  |
|                          | ENSRORG000000010844 | lam83b        | family with sequence similarity 83, member B [Source:ZFIN;Acc:ZDB-GENE-041114-194]                                                           | 5.02723335   | -0.140783556 | -0.343590118 | 4.824911477  |
|                          | ENSRORG000000012534 | lmtosp2b      | leucostemone tissue ospn 2b [Source:ZFIN;Acc:ZDB-GENE-110411-43]                                                                             | 7.015859967  | 1.631236111  | -0.492289801 | 4.8492819163 |
|                          | ENSRORG00000003219  | -             | -                                                                                                                                            | 4.793938434  | 1.866869688  | 2.772614774  | 5.700174925  |
|                          | ENSRORG000000017688 | rop11         | low density lipoprotein receptor-related protein 11 [Source:ZFIN;Acc:ZDB-GENE-030313-7847]                                                   | 3.397187434  | 0.151349141  | 1.05546703   | 4.354870364  |
|                          | ENSRORG00000009344  | chyh          | phytanoyl-CoA 2-hydroxylase [Source:ZFIN;Acc:ZDB-GENE-050417-36]                                                                             | 4.654069585  | 1.199669879  | -0.211640732 | 3.24244013   |
|                          | ENSRORG00000003914  | skp2a         | SKP2, serine/threonine kinase 2 [Source:NCBI gene;Acc:101162289]                                                                             | 3.878808712  | -0.206395088 | -1.080887353 | 3.004802083  |
|                          | ENSRORG00000000494  | hmx2          | homeobox protein MSX-2 [Source:NCBI gene;Acc:10089217]                                                                                       | 6.404834445  | 1.598127372  | -1.697946293 | 3.109244883  |
|                          | ENSRORG000000050591 | dwdc1a        | DX domain containing 1a [Source:ZFIN;Acc:ZDB-GENE-070921-2]                                                                                  | 4.545628933  | 2.00085875   | 0.93255712   | 3.477813413  |
|                          | ENSRORG000000013216 | tnk2a         | tyrosine kinase, non-receptor, 2a [Source:ZFIN;Acc:ZDB-GENE-091118-85]                                                                       | 3.684709369  | 0.051452161  | 2.090104255  | 5.123846228  |
|                          | ENSRORG00000005853  | rhd8a         | retinol dehydrogenase 8 [Source:NCBI gene;Acc:101157056]                                                                                     | 5.366647554  | 0.073276841  | 5.726479309  | 3.18221728   |
|                          | ENSRORG000000014356 | si-ch211-1602 | E2F transcription factor 2 [Source:HGNC Symbol;Acc:HGNC:3114]                                                                                | 4.547606297  | 0.559448472  | 1.219550186  | 5.208187682  |
|                          | ENSRORG000000091928 | slca9a2       | solute carrier family 9, subfamily A (NHE3, cation proton antiporter 3), member 3, tandem duplicate 2 [Source:ZFIN;Acc:ZDB-GENE-070112-2112] | 4.934440409  | -1.259139378 | -2.99697533  | 3.197090733  |
|                          | ENSRORG00000006346  | ttf7          | tubulin tyrosine ligase-like family, member 7 [Source:ZFIN;Acc:ZDB-GENE-070112-2112]                                                         | 5.729193371  | 0.973814362  | 0.906623731  | 5.662490206  |
|                          | ENSRORG000000014098 | -             | -                                                                                                                                            | 3.559643463  | 1.500809604  | 1.756912751  | 3.818231728  |
|                          | ENSRORG00000007198  | kyd6          | FXYD domain-containing ion transport regulator 6 [Source:NCBI gene;Acc:101162228]                                                            | 5.290034332  | -0.41630157  | 1.727119756  | 4.43934054   |
|                          | ENSRORG000000017040 | cers6         | ceramide synthase 6 [Source:NCBI gene;Acc:101156449]                                                                                         | 4.385291128  | 1.780343995  | 1.74255883   | 7.48809807   |
|                          | ENSRORG00000007145  | sgl5          | SGS1 ubiquitin-like modifier [Source:ZFIN;Acc:ZDB-GENE-021211-1]                                                                             | 6.753144701  | 0.474437172  | -2.94344093  | 3.335751679  |
|                          | ENSRORG000000018061 | ankrd10b      | ankyrin repeat domain 10b [Source:ZFIN;Acc:ZDB-GENE-061013-49]                                                                               | 4.039189829  | 1.62161377   | 0.621137824  | 3.039198755  |
|                          | ENSRORG00000003469  | -             | -                                                                                                                                            | 5.44184044   | 1.488216969  | 0.116675105  | 4.070785927  |
|                          | ENSRORG00000004499  | rab38b        | ras-related protein Rab-38 [Source:NCBI gene;Acc:101171270]                                                                                  | 4.80494061   | 3.17703345   | 1.426739663  | 3.055132104  |
|                          | ENSRORG00000002198  | zhrl2         | coagulation factor 1 (thrombin) receptor-like 1, tandem duplicate 2 [Source:ZFIN;Acc:ZDB-GENE-070615-24]                                     | 3.689016458  | 1.030846237  | 1.044128614  | 3.699882141  |
| HMO VS WTI<br>Hm1 VS WTI | 51                  | entpd3        | ectonucleoside triphosphate diphosphohydrolase 3 [Source:ZFIN;Acc:ZDB-GENE-030313-6186]                                                      | -1.242679647 | 3.379546703  | 4.474189010  | -0.147553406 |
|                          | ENSRORG00000021631  | RF00088       | small nuclear RNA SNORD30 [Source:NCBI gene;Acc:111946357]                                                                                   | -13.07658181 | 3.877014117  | 16.73423106  | -0.21807556  |
|                          | ENSRORG00000003088  | -             | -                                                                                                                                            | -1.782346886 | 6.177407831  | 5.260231237  | -2.699035064 |
|                          | ENSRORG000000010931 | qsg13         | regulator of G-protein signaling 21 [Source:NCBI gene;Acc:101157397]                                                                         | -11.87924628 | 4.383144949  | 17.18154946  | -0.919649957 |
|                          | ENSRORG000000011894 | -             | -                                                                                                                                            | -16.02235719 | 3.206633531  | 16.28443772  | -2.94406294  |
|                          | ENSRORG00000000877  | -             | -                                                                                                                                            | 1.296137302  | 4.020825217  | 3.611503924  | 0.887300516  |
|                          | ENSRORG000000021349 | RF00581       | small nuclear SNORD12/SNORD106 [Source:NCBI gene;Acc:111946100]                                                                              | 0            | 15.85143234  | 15.68362107  | -0.167338814 |
|                          | ENSRORG00000006320  | CASP1         | caspace 1 [Source:HGNC Symbol;Acc:HGNC:1499]                                                                                                 | 2.462170178  | 3.063665442  | 3.509955637  | 2.908945171  |
|                          | ENSRORG000000011737 | -             | -                                                                                                                                            | 1.753433532  | 6.964474839  | 6.954008949  | 1.743537322  |
|                          | ENSRORG000000021768 | ATP8          | ATP synthase F0 subunit 8 [Source:NCBI gene;Acc:805430]                                                                                      | -1.052353917 | 4.643563323  | 4.49559189   | -1.19992065  |
|                          | ENSRORG000000017072 | -             | -                                                                                                                                            | -14.84577964 | 4.858686716  | 17.23187412  | -4.269824708 |
|                          | ENSRORG00000021713  | -             | -                                                                                                                                            | -0.977761891 | 3.104907123  | -0.90610143  | -0.101647504 |
|                          | ENSRORG000000014848 | codc59        | coiled-coil domain containing 59 [Source:NCBI gene;Acc:101167836]                                                                            | -16.54662863 | 3.555423959  | 16.59110578  | -3.51054622  |
|                          | ENSRORG000000074466 | lrc61         | leucine rich repeat containing 61 [Source:ZFIN;Acc:ZDB-GENE-060616-245]                                                                      | -16.39836761 | 3.743613292  | 17.84795623  | -2.293536023 |
|                          | ENSRORG000000013307 | -             | -                                                                                                                                            | -0.929430527 | 3.29038638   | 4.55024202   | 0.331369448  |
|                          | ENSRORG00000000892  | -             | -                                                                                                                                            | -2.958372497 | 3.898290217  | 5.930064369  | -0.926109597 |

|  |                     |           |                                                                                              |              |              |             |              |
|--|---------------------|-----------|----------------------------------------------------------------------------------------------|--------------|--------------|-------------|--------------|
|  | ENSRORG00000000351  | cop2b     | COP signalosome subunit 2 [Source:ZFIN;Acc:ZDB-GENE-040625-15]                               | -6.387802188 | 2.366900522  | 8.973516339 | 0.712996619  |
|  | ENSRORG00000005638  | ckc20     | Oryzae latipes cell division cycle 20 [cdc20], mRNA [Source:RefSeq mRNA;Acc:NM_0160429]      | -5.643613078 | 0.078390375  | 4.544630463 | -1.17689414  |
|  | ENSRORG00000016447  | ckc20     | Oryzae latipes cell division cycle 20 [cdc20], mRNA [Source:RefSeq mRNA;Acc:NM_0160429]      | -4.277219337 | -0.013546088 | 3.869433311 | -0.393754729 |
|  | ENSRORG00000017696  | -         | -                                                                                            | -4.172512056 | 0.135239884  | 4.598951358 | 0.343323747  |
|  | ENSRORG000000013659 | -         | -                                                                                            | -4.383684504 | 0.396696951  | 1.834092795 | -2.925838276 |
|  | ENSRORG000000014689 | -         | -                                                                                            | -3.194680959 | -0.354929344 | 1.499284168 | -1.339889998 |
|  | ENSRORG00000012401  | fetub     | fetuin, B-like [Source:NCBI gene;Acc:101158597]                                              | -5.190898953 | -2.715881636 | 0.588582228 | -1.886582079 |
|  | ENSRORG000000014395 | -         | -                                                                                            | -5.780202634 | 0.546199644  | 6.983986414 | 0.63997958   |
|  | ENSRORG000000013917 | top1i     | DNA topoisomerase 1 like [Source:ZFIN;Acc:ZDB-GENE-06016-217]                                | -3.110262018 | 0.63401922   | 3.004037755 | -0.740241172 |
|  | ENSRORG00000007720  | kyt1l     | kytoid-like tyrosyltransferase 1 [Source:ZFIN;Acc:ZDB-GENE-121054-2]                         | -3.122871263 | -0.60405491  | 2.852809832 | 0.33481724   |
|  | ENSRORG000000015890 | atp9v1e1  | V-type proton ATPase subunit E 1 [Source:NCBI gene;Acc:101155846]                            | -4.556435834 | -0.356399597 | 3.25634304  | -0.943208395 |
|  | ENSRORG000000012417 | -         | -                                                                                            | -4.02145638  | -0.327597726 | 1.733619621 | -1.959754515 |
|  | ENSRORG00000003595  | sidney-6l | polyamine-modulated factor 1 [Source:NCBI gene;Acc:101157951]                                | -3.369578671 | 1.655239818  | 6.67678546  | 1.65241719   |
|  | ENSRORG000000009466 | -         | -                                                                                            | -15.91312378 | 2.213178008  | 15.57018154 | -2.615629644 |
|  | ENSRORG000000009410 | rab5f     | RAB5 interacting factor [Source:ZFIN;Acc:ZDB-GENE-030313-5928]                               | -3.269578671 | 1.991118447  | 18.34438417 | -1.021667583 |
|  | ENSRORG00000006027  | myop3     | myosin binding protein C, cardiac [Source:ZFIN;Acc:ZDB-GENE-070112-2362]                     | -4.683171147 | -1.043484356 | 5.088716675 | -3.005404017 |
|  | ENSRORG00000009878  | mrps18a   | mitochondrial ribosomal protein S18A [Source:ZFIN;Acc:ZDB-GENE-041210-109]                   | -4.358165368 | 1.089967861  | 5.502386954 | 0.055620227  |
|  | ENSRORG00000000978  | -         | -                                                                                            | -3.336503804 | -0.117975964 | 2.840303074 | -0.377692381 |
|  | ENSRORG000000011157 | -         | -                                                                                            | -3.124218139 | -0.211939059 | 1.986371635 | -0.925062726 |
|  | ENSRORG000000017105 | -         | -                                                                                            | -3.87583639  | -0.629597257 | 6.104323867 | -2.202530587 |
|  | ENSRORG000000018095 | -         | -                                                                                            | -4.097715184 | -0.019964941 | 2.396134444 | -1.681141851 |
|  | ENSRORG000000017096 | -         | -                                                                                            | -3.078541521 | -0.979563387 | 1.650307317 | 4.051814746  |
|  | ENSRORG00000003023  | sich73-3b | sich73-3b on 15.2 [Source:ZFIN;Acc:ZDB-GENE-090313-16]                                       | -3.063329784 | -1.196334331 | 0.097637277 | -1.768872546 |
|  | ENSRORG00000013085  | dgrp6     | Drosophila syndrome critical region gene 6 [Source:ZFIN;Acc:ZDB-GENE-040912-125]             | -6.418017847 | 2.472887565  | 8.036283882 | -0.852234352 |
|  | ENSRORG000000005512 | -         | -                                                                                            | -15.66568789 | 0.486610083  | 16.98379591 | 0.831987963  |
|  | ENSRORG000000015913 | -         | -                                                                                            | -4.708495187 | 1.187219685  | 6.339671587 | 0.444498611  |
|  | ENSRORG000000006615 | cnob2     | cyclin B2 [Source:ZFIN;Acc:ZDB-GENE-030429-12]                                               | -5.151086309 | -0.158621867 | 3.192614207 | -1.7999611   |
|  | ENSRORG000000014480 | clnna4    | clnna4 [Source:ZFIN;Acc:ZDB-GENE-030313-4663]                                                | -3.379045445 | -0.045697234 | 0.586193967 | -2.33967992  |
|  | ENSRORG000000015140 | polr2k    | polymyrase (PAA) II (DNA directed) polypeptide G-like [Source:ZFIN;Acc:ZDB-GENE-030313-2898] | -4.165346944 | 1.526296446  | 6.770132937 | 1.078973943  |
|  | ENSRORG00000004968  | hprt1     | histone H4 lysine acetyltransferase 1 [Source:ZFIN;Acc:ZDB-GENE-030313-740]                  | -3.023176391 | 0.456785752  | 3.925628495 | 0.446151348  |
|  | ENSRORG000000013500 | mrp42     | mitochondrial ribosomal protein L42 [Source:ZFIN;Acc:ZDB-GENE-101014-1]                      | -7.249409004 | -0.728804617 | 5.830011071 | -0.689010055 |
|  | ENSRORG000000011310 | -         | -                                                                                            | -3.892837305 | -0.203881848 | 2.00314891  | -1.685321573 |
|  | ENSRORG00000005927  | gsm1      | glutathione S-transferase Mu 3 [Source:NCBI gene;Acc:101157367]                              | -3.196017851 | 2.406141104  | 4.088312071 | -1.513586077 |
|  | ENSRORG00000004408  | znhf2     | zinc finger, HMT-type containing 2 [Source:ZFIN;Acc:ZDB-GENE-061013-461]                     | -5.921687441 | 1.122853541  | 6.454435355 | -0.589618814 |
|  | ENSRORG000000010744 | zgc:10174 | zgc:10174 [Source:ZFIN;Acc:ZDB-GENE-050320-111]                                              | -3.323739008 | 0.662775507  | 5.518744464 | 1.532715012  |
|  | ENSRORG00000010809  | zgc:10101 | chromosome 9 Cborf55 homolog [Source:NCBI gene;Acc:101167131]                                | -6.045432122 | 2.1          |             |              |

|            |                |                                                                                                     |   |   |              |              |             |              |
|------------|----------------|-----------------------------------------------------------------------------------------------------|---|---|--------------|--------------|-------------|--------------|
|            |                | ENSRORG0000015481                                                                                   | - | - | -0.806342283 | 3.547071895  | 4.795629699 | 0.442699995  |
|            |                | ENSRORG0000021776                                                                                   | - | - | -2.154949255 | 4.260665844  | 6.619866314 | 0.204739397  |
|            |                | ENSRORG0000009095                                                                                   | - | - | -1.388232689 | 4.403817035  | 4.892224497 | -0.899340079 |
|            | caoylp7        | calyculin binding protein [Source:ZFIN;Acc:ZDB-GENE-040426-2579]                                    | - | - | -5.235665682 | 3.021109765  | 5.29597897  | -2.960312682 |
|            |                | ENSRORG00000030152                                                                                  | - | - | -12.21090569 | 3.611493887  | 17.13063417 | 1.308622375  |
|            |                | ENSRORG0000003994                                                                                   | - | - | 1.444821952  | 3.051881773  | 3.449923714 | 1.843348634  |
|            |                | ENSRORG00000015699                                                                                  | - | - | -1.061322839 | 4.188981955  | 3.07223312  | -2.177587006 |
|            |                | ENSRORG00000011148                                                                                  | - | - | 0.628339602  | 3.555682248  | 4.79200102  | 1.865144269  |
|            |                | ENSRORG00000009944                                                                                  | - | - | -0.606954623 | 4.026796607  | 5.359997393 | 0.726723387  |
|            |                | ENSRORG00000003863                                                                                  | - | - | -4.073374847 | 4.018943078  | 8.796888995 | 0.704067542  |
|            |                | ENSRORG00000021048                                                                                  | - | - | 0            | 18.12980169  | 15.913046   | -2.216283219 |
|            | GTF3C6         | general transcription factor IIC subunit 6 [Source:HGNC Symbol;Acc:HGNC:20872]                      | - | - | -14.67936134 | 4.152949785  | 17.82787303 | -1.003948122 |
|            |                | ENSRORG00000009313                                                                                  | - | - | 1.785479871  | 3.750792787  | 5.887853982 | 2.847186967  |
|            |                | ENSRORG00000003933                                                                                  | - | - | 1.204092243  | 3.373452314  | 3.788256862 | 1.619392108  |
|            | spc25          | potassium voltage-gated channel interacting protein 1 [Source:NCBI gene:Acc:101160987]              | - | - | -4.60626571  | 3.838688423  | 8.95398504  | 0.50893376   |
|            |                | ENSRORG0000006512                                                                                   | - | - | -3.089447523 | 3.581472081  | 6.94478606  | 0.274346095  |
|            |                | ENSRORG00000000001                                                                                  | - | - | -2.271823582 | 4.156445042  | 6.625664582 | 0.199622849  |
|            |                | ENSRORG00000009806                                                                                  | - | - | -13.36345957 | 4.31958364   | 16.72555132 | -0.957388017 |
|            |                | ENSRORG00000015296                                                                                  | - | - | 13.328212    | 15.72530261  | 4.486094824 | 2.094083823  |
|            |                | ENSRORG00000007415                                                                                  | - | - | 0.259829669  | 3.220825748  | 3.67333354  | 0.676821572  |
|            |                | ENSRORG00000002132                                                                                  | - | - | 1.521595074  | 3.865857132  | 3.245770728 | 0.901956562  |
|            | orf1a-uba      | major histocompatibility complex class I-related gene protein-like [Source:NCBI gene:Acc:101168971] | - | - | -1.564177067 | 3.21869698   | 6.392736988 | 1.610348441  |
|            | unm_hu7912     | un-named hu7912 [Source:ZFIN;Acc:ZDB-GENE-120727-20]                                                | - | - | -3.419694192 | 3.014230318  | 6.202387388 | -0.231051001 |
|            | cocd115        | coiled-coil domain containing 115 [Source:ZFIN;Acc:ZDB-GENE-050227-20]                              | - | - | 0.76202122   | 3.714469241  | 19.04628249 | -0.889717879 |
|            |                | ENSRORG00000001196                                                                                  | - | - | -0.874206887 | 5.386073913  | 4.547420882 | -0.706043151 |
|            | srn1           | sulfiredoxin 1 homolog (S. cerevisiae) [Source:NCBI gene:Acc:101194781]                             | - | - | -15.40635185 | 3.239792197  | 16.51479186 | -2.130862051 |
|            | RF00604        | small nucleolar RNA SNORD88 [Source:NCBI gene:Acc:119497489]                                        | - | - | -11.78991261 | 4.060214326  | 18.09306758 | 2.243429445  |
|            |                | ENSRORG00000000970                                                                                  | - | - | -0.734138443 | 4.141615702  | 5.487999347 | 0.61273753   |
|            |                | ENSRORG00000003349                                                                                  | - | - | 1.901034479  | 4.188958909  | 3.93597866  | 1.64853963   |
|            |                | ENSRORG00000008884                                                                                  | - | - | -4.432402165 | 5.468364311  | 8.544434311 | -1.355947069 |
|            |                | ENSRORG00000001626                                                                                  | - | - | 0.664873775  | 4.495232024  | 3.05430456  | -0.775568623 |
|            | orf1a-uaa      | major histocompatibility complex class I-related gene protein-like [Source:NCBI gene:Acc:101167181] | - | - | -1.918299205 | 3.269770386  | 7.019930831 | 2.232319062  |
|            |                | ENSRORG00000001171                                                                                  | - | - | 1.192752806  | 3.411875709  | 3.89765572  | 1.679018328  |
|            |                | ENSRORG00000006453                                                                                  | - | - | 0.028539518  | 4.174879476  | 4.109223382 | -0.036632148 |
|            | RF00211        | small nucleolar RNA SNORD35 [Source:NCBI gene:Acc:11947881]                                         | - | - | -11.31474184 | 4.630899991  | 16.10720911 | 1.026068986  |
| Hmt VS Hmo | 392            | ENSRORG000000012419                                                                                 | - | - | -0.512654554 | 1.747292241  | 6.18996395  | 3.910145991  |
| Hmt VS WTT |                | ENSRORG000000021702                                                                                 | - | - | 0.909046702  | 2.051825462  | 8.07917982  | 4.838242424  |
|            |                | ENSRORG000000015179                                                                                 | - | - | 4.22662672   | -0.04827848  | 7.93419557  | 12.20956663  |
|            |                | ENSRORG00000004816                                                                                  | - | - | 13.28079331  | 9.42729189   | 3.873241558 | 7.72679897   |
|            |                | ENSRORG000000009290                                                                                 | - | - | 2.07832775   | 1.422564727  | 3.972724945 | 4.628976954  |
|            |                | ENSRORG000000010366                                                                                 | - | - | 0.527604863  | 1.93054682   | 5.032492788 | 3.630033558  |
|            |                | ENSRORG00000004877                                                                                  | - | - | 3.628686887  | 2.752265144  | 3.378099766 | 4.254836618  |
|            |                | ENSRORG000000013010                                                                                 | - | - | 14.24920606  | 0            | 5.282249312 | 15.53194684  |
|            |                | ENSRORG000000011998                                                                                 | - | - | 0            | 13.4854545   | 17.5689976  | 0.084006253  |
|            | gap44          | glycerol-3-phosphate acyltransferase 4 [Source:ZFIN;Acc:ZDB-GENE-060421-5102]                       | - | - | 9.148146059  | 11.83590829  | 6.789182009 | 4.10182855   |
|            |                | ENSRORG000000013996                                                                                 | - | - | -0.557052574 | 2.436576954  | 7.01656692  | 0.023412354  |
|            |                | ENSRORG000000021715                                                                                 | - | - | 6.371728808  | 5.016762925  | 3.5679351   | 4.933768307  |
|            |                | ENSRORG000000018224                                                                                 | - | - | -11.57894343 | 0.709664706  | 17.08147137 | 1.573358874  |
|            |                | ENSRORG000000016495                                                                                 | - | - | 2.893506677  | -0.474237298 | 3.111021432 | 6.479324136  |
|            |                | ENSRORG000000060011                                                                                 | - | - | 12.32661206  | 12.58738374  | 5.177099051 | 4.916792792  |
|            |                | ENSRORG00000009619                                                                                  | - | - | 12.53699751  | 9.988485877  | 4.039518703 | 6.58849374   |
|            |                | ENSRORG000000018005                                                                                 | - | - | -10.8541256  | -10.85409918 | 17.22527296 | 17.22527296  |
|            |                | ENSRORG000000011276                                                                                 | - | - | 0.063635329  | 4.043127334  | 4.006090809 | 3.667083962  |
|            |                | ENSRORG000000021667                                                                                 | - | - | 2.772094905  | 1.904247876  | 3.584267326 | 4.451829641  |
|            |                | ENSRORG00000008793                                                                                  | - | - | 2.122780435  | -0.647742961 | 5.739143971 | 8.510149393  |
|            |                | ENSRORG00000002394                                                                                  | - | - | 3.710128764  | 1.145455472  | 4.12196445  | 6.687126581  |
|            |                | ENSRORG000000016632                                                                                 | - | - | 11.3011532   | 10.38786655  | 5.364104316 | 6.277496878  |
|            |                | ENSRORG00000004631                                                                                  | - | - | 2.433052175  | 2.667351958  | 3.67589635  | 3.656977244  |
|            |                | ENSRORG000000012774                                                                                 | - | - | 1.378601347  | -0.356267149 | 3.289776908 | 5.025130434  |
|            | 14-dayey-33m11 | collagen, type XIV, alpha 1a [Source:ZFIN;Acc:ZDB-GENE-030131-9889]                                 | - | - | 11.27495465  | 9.620568083  | 4.340158036 | 5.995017365  |
|            |                | ENSRORG000000021588                                                                                 | - | - | 14.50988627  | 12.03865497  | 3.368410222 | 18.288099596 |
|            |                | ENSRORG00000004573                                                                                  | - | - | 15.25729797  | 11.22037228  | 4.753488106 | 8.790851252  |
|            |                | ENSRORG00000007334                                                                                  | - | - | 17.9229871   | 0            | 6.012420354 | 17.8551777   |
|            |                | ENSRORG00000002968                                                                                  | - | - | 1.76971154   | -0.898868076 | 8.217195444 | 8.395130234  |
|            |                | ENSRORG000000013376                                                                                 | - | - | 5.065498319  | 2.163892019  | 5.04759665  | 8.607738106  |
|            |                | ENSRORG000000018218                                                                                 | - | - | 0            | 13.35918538  | 18.65819572 | 5.299482419  |

|  |         |                                                                                                  |   |   |              |              |              |              |
|--|---------|--------------------------------------------------------------------------------------------------|---|---|--------------|--------------|--------------|--------------|
|  |         | ENSRORG000000003440                                                                              | - | - | -            | -            | -            | -            |
|  | h3gat1a | beta-1,3-galactosyltransferase 1-like [Source:NCBI gene:Acc:101163306]                           | - | - | -4.047115466 | -            | -2.771233406 | -0.079456344 |
|  | smyd2a  | N1-lysine methyltransferase SMYD2-A [Source:NCBI gene:Acc:101159335]                             | - | - | -3.747684031 | -0.231733961 | -1.30130033  | -1.602471816 |
|  | erc1c1  | excision repair cross-complementation group 1 [Source:ZFIN;Acc:ZDB-GENE-040426-2886]             | - | - | -5.055928166 | 1.11616255   | 6.547252072  | 0.375636256  |
|  | kmt5ab  | lysine methyltransferase 5Ab [Source:ZFIN;Acc:ZDB-GENE-071004-17]                                | - | - | -3.56801145  | 1.184172592  | 3.783235261  | 0.968841712  |
|  | arf16   | ADP ribosylation factor like GTPase 16 [Source:NCBI gene:Acc:101166136]                          | - | - | -6.155613057 | 1.022119197  | 7.729515241  | 0.521193257  |
|  |         | ENSRORG00000000692                                                                               | - | - | -3.38313368  | -0.182368948 | 3.269592478  | 0.114500301  |
|  | tusc3   | tumor suppressor candidate 3 [Source:NCBI gene:Acc:101168184]                                    | - | - | -3.317643446 | 0.515056163  | 4.600234194  | 1.688017248  |
|  | nabp1a  | nucleic acid binding protein 1a [Source:ZFIN;Acc:ZDB-GENE-041212-71]                             | - | - | -3.025645669 | 0.282236033  | 1.882898568  | -1.424498239 |
|  | zhnf16  | zinc finger HT-type containing 6 [Source:ZFIN;Acc:ZDB-GENE-114011-39]                            | - | - | -3.756801151 | 1.276984166  | 4.481324871  | -0.551974872 |
|  |         | ENSRORG000000010767                                                                              | - | - | -4.31821137  | -0.067847448 | 3.625310876  | 0.624567401  |
|  | elf3b   | eukaryotic translation initiation factor 3 subunit B [Source:ZFIN;Acc:ZDB-GENE-040426-2900]      | - | - | -3.865652526 | 0.895456973  | 4.91915607   | 1.58441399   |
|  |         | ENSRORG00000006244                                                                               | - | - | -4.588420394 | -0.46817732  | 3.094869037  | -1.980280502 |
|  |         | ENSRORG00000005127                                                                               | - | - | -3.194443845 | -0.987319528 | 4.245453985  | 1.219413106  |
|  | ube2g1a | ubiquitin-conjugating enzyme E2G 1a (UBC7 homolog, yeast) [Source:ZFIN;Acc:ZDB-GENE-030131-6065] | - | - | -4.380632997 | 0.893341051  | 6.98719432   | 1.713705381  |
|  |         | ENSRORG00000009852                                                                               | - | - | -4.573438823 | -2.270533046 | -4.399745037 | -3.99745037  |
|  |         | ENSRORG00000005286                                                                               | - | - | -3.283506546 | 0.086447739  | 3.323038301  | -0.060281242 |
|  | pnsen   | presenilin enhancer, gamma-secretase subunit [Source:NCBI gene:Acc:101173167]                    | - | - | -8.341491795 | 0.920383839  | 8.666769667  | -0.950460969 |
|  |         | ENSRORG000000009347                                                                              | - | - | -3.781726874 | 0.769487901  | 5.414813787  | 0.883438583  |
|  | npm3    | nucleophosmin/nucleoplasmin 3 [Source:NCBI gene:Acc:101163269]                                   | - | - | -3.50973579  | 0.893547197  | 6.98443797   | -1.705324453 |
|  |         | ENSRORG00000006615                                                                               | - | - | -4.148130895 | 0.752669564  | 4.876582865  | -0.023732751 |
|  | aurka   | aurora kinase A [Source:ZFIN;Acc:ZDB-GENE-040801-181]                                            | - | - | -3.289304705 | -0.016887184 | 2.721855844  | -0.59076732  |
|  | tmem167 | transmembrane protein 167A [Source:ZFIN;Acc:ZDB-GENE-050302-29]                                  | - | - | -3.032399356 | 0.41382787   | 1.918067532  | -1.527674976 |
|  |         | ENSRORG00000008817                                                                               | - | - | -3.154102839 | 1.838482022  | 6.451401847  | 1.487302767  |
|  | nop2    | NOP2 nuclear protein homolog (yeast) [Source:ZFIN;Acc:ZDB-GENE-050309-7]                         | - | - | -3.721204647 | -0.740716147 | 2.43124241   | -0.548761208 |
|  | UBL5    | ubiquitin like 5 [Source:HGNC Symbol;Acc:HGNC:13736]                                             | - | - | -4.788578985 | 1.229220539  | 6.312674627  | 0.295362337  |
|  |         | ENSRORG00000008064                                                                               | - | - | -4.786585085 | 0.09291534   | 5.482441514  | 0.583423657  |
|  | ptgessb | prostaglandin E synthase 3b (cytosolic) [Source:ZFIN;Acc:ZDB-GENE-040625-144]                    | - | - | -3.071196665 | 1.112232069  | 6.233572455  | -2.05062897  |
|  | MME     | membrane metalloendopeptidase [Source:HGNC Symbol;Acc:HGNC:7154]                                 | - | - | -6.419057143 | -0.395196817 | 3.027981449  | -2.96593939  |
|  |         | ENSRORG00000003007                                                                               | - | - | -3.16648634  | -0.02803749  | 3.578408885  | 0.432328082  |
|  |         | ENSRORG00000002486                                                                               | - | - | -4.418013045 | 1.447528228  | 5.584076242  | -0.28035709  |
|  |         | ENSRORG00000009714                                                                               | - | - | -3.315470002 | -0.460393384 | 3.717788804  | 0.11682157   |
|  | tmem53  | transmembrane protein 53 [Source:ZFIN;Acc:ZDB-GENE-040718-384]                                   | - | - | -3.016931142 | -0.683793702 | -0.151927077 | -2.84580614  |
|  | mrps10  | mitochondrial ribosomal protein S10 [Source:ZFIN;Acc:ZDB-GENE-040914-39]                         | - | - | -3.887028886 | 0.730902918  | 5.01204185   | 0.394553458  |
|  | tmr2b   | tRNA methyltransferase 2 homolog B [Source:ZFIN;Acc:ZDB-GENE-050809-101]                         | - | - | -3.249697407 | -1.125525722 | 2.861635257  | 0.379747288  |
|  | copz1   | coatamer protein complex, subunit zeta 1 [Source:ZFIN;Acc:ZDB-GENE-000506-6]                     | - | - | -4.194849474 | 2.162972275  | 6.735595167  | 0.37821767   |
|  | pozf2   | POU class 6 homeobox 2 [Source:ZFIN;Acc:ZDB-GENE-091118-71]                                      | - | - | -3.09688021  | 1.012665979  | 8.09293738   | -2.401627912 |
|  | atn3    | atenin 3 [Source:ZFIN;Acc:ZDB-GENE-040426-883]                                                   | - | - | -16.82320635 | 1.371930638  | 17.58628286  | -0.9642783   |
|  |         | ENSRORG00000005233                                                                               | - | - | -3.273974386 | 0.188362397  | 1.060598852  | -2.401253114 |
|  |         | ENSRORG000000017861                                                                              | - | - | -3.463524741 | 0.458290401  | 2.261355559  | -1.659974534 |
|  | ftsj3   | FtsJ RNA methyltransferase homolog 3 [Source:NCBI gene:Acc:101158684]                            | - | - | -3.018091879 | -0.477951317 | 2.471790335  | -0.067865267 |
|  | ndufa3  | NADH dehydrogenase (ubiquinone) alpha subcomplex 3 [Source:ZFIN;Acc:ZDB-GENE-040801-18]          | - | - | -18.58421079 | 1.293797517  | 20.3074438   | 1.03274438   |
|  |         | ENSRORG00000005051                                                                               | - | - | -17.40994247 | -0.251423144 | 16.14373934  | -1.014289865 |
|  | dnlz    | DNL-type zinc finger [Source:ZFIN;Acc:ZDB-GENE-071012-5]                                         | - | - | -            |              |              |              |

|  |                    |               |                                                                                                         |              |              |             |             |
|--|--------------------|---------------|---------------------------------------------------------------------------------------------------------|--------------|--------------|-------------|-------------|
|  | ENSRLO00000017885  | HS3ST5        | heparan sulfate-glucosaminase 3-sulfotransferase 5<br>[Source:NCBI gene:Acc:101165781]                  | -0.205203017 | -0.970475533 | 3.205907855 | 3.971666102 |
|  | ENSRLO00000010320  | -             | -                                                                                                       | 0            | 0            | 18.09281071 | 18.0930748  |
|  | ENSRLO00000017411  | -             | -                                                                                                       | 2.596993132  | 0.289789538  | 6.06737962  | 8.374916419 |
|  | ENSRLO00000026364  | zpc-17z282    | zpc-17z282 [Source:ZFIN:Acc:ZDB-GENE-080219-38]                                                         | 2.331807233  | 4.474749647  | 3.272188523 | 3.272188523 |
|  | ENSRLO00000019377  | zpc-17z282    | zpc-17z282 [Source:ZFIN:Acc:ZDB-GENE-080219-38]                                                         | 2.304262434  | 3.078602231  | 5.85074882  | 5.85074882  |
|  | ENSRLO00000020942  | Rf00001       | 5S ribosomal RNA [Source:NCBI gene:Acc:111947244]                                                       | 14.42437102  | 12.08932799  | 3.060327799 | 5.396835921 |
|  | ENSRLO00000006868  | stk33         | serine/threonine kinase 33 [Source:ZFIN:Acc:ZDB-GENE-040724-242]                                        | 4.34787119   | 1.825773898  | 4.842255172 | 7.364835738 |
|  | ENSRLO00000008074  | -             | -                                                                                                       | -13.00279744 | 0.09876067   | 16.21216463 | 3.111091168 |
|  | ENSRLO00000016437  | ttc8          | tetratricopeptide repeat domain 8 [Source:NCBI gene:Acc:101163700]                                      | 1.061816025  | -0.065011099 | 4.673568735 | 5.800886945 |
|  | ENSRLO00000005686  | si:dkeyp-69c1 | uncharacterized LOC101171185 [Source:NCBI gene:Acc:101171185]                                           | -10.71192504 | 2.016112569  | 16.49709076 | 15.5125289  |
|  | ENSRLO00000010416  | -             | -                                                                                                       | -10.41914909 | 0.221178694  | 15.66894127 | 5.028693752 |
|  | ENSRLO00000003306  | -             | -                                                                                                       | 10.57088988  | 12.95452895  | 5.43252687  | 3.049361003 |
|  | ENSRLO00000002494  | ph1d3         | PH1 domain containing 3 [Source:ZFIN:Acc:ZDB-GENE-040722-21]                                            | 2.527502778  | 1.124819709  | 7.53921956  | 8.9423878   |
|  | ENSRLO00000009441  | cdc           | Oryzopsis latipes phosphatase (cdc) mRNA [Source:RefSeq mRNA:Acc:NM_001177855]                          | 11.18341208  | 11.23521247  | 5.048675104 | 4.997341347 |
|  | ENSRLO00000010614  | dnajb6b       | DnaJ (Hsp40) homolog, subfamily B, member 6b [Source:ZFIN:Acc:ZDB-GENE-040426-1122]                     | -0.977250891 | -0.330962859 | 3.958835443 | 3.314032361 |
|  | ENSRLO00000015607  | -             | -                                                                                                       | 1.332345169  | 1.379418227  | 3.619524561 | 3.573936349 |
|  | ENSRLO00000012879  | -             | -                                                                                                       | 1.605294752  | 0.392928622  | 3.602043695 | 4.18389494  |
|  | ENSRLO00000017596  | -             | -                                                                                                       | 0            | 8.931978467  | 17.61890337 | 8.685392091 |
|  | ENSRLO00000010747  | -             | -                                                                                                       | -9.031080857 | -0.369860348 | 18.99861101 | 10.29611483 |
|  | ENSRLO00000006156  | tht1b         | ferritin, heavy polypeptide 1b [Source:ZFIN:Acc:ZDB-GENE-040912-30]                                     | -0.997126765 | -0.535664091 | 3.850820567 | 3.98984278  |
|  | ENSRLO00000011321  | AKR1D1        | 3-oxo-5-beta-steroid 4-dehydrogenase [Source:NCBI gene:Acc:101107970]                                   | 3.348479508  | 0.3301133678 | 4.300110463 | 4.331346173 |
|  | ENSRLO00000017175  | cdc173        | coiled-coil domain containing 173 [Source:ZFIN:Acc:ZDB-GENE-0811104-457]                                | -1.085816545 | 0.315382597  | 8.484092298 | 7.083379121 |
|  | ENSRLO00000009146  | tescb         | tescalin b [Source:ZFIN:Acc:ZDB-GENE-040426-1903]                                                       | -0.061072886 | 4.05813458   | 9.15110751  | 9.03240548  |
|  | ENSRLO00000004550  | -             | -                                                                                                       | -13.55200259 | 1.98200398   | 19.60596858 | 4.072452513 |
|  | ENSRLO00000000175  | -             | -                                                                                                       | -            | -            | -           | -           |
|  | ENSRLO000000016751 | CCDC148       | coiled-coil domain containing 148 [Source:HGNC Symbol:Acc:HGNC:25191]                                   | 6.161049669  | 3.478708783  | 3.065705765 | 5.50839439  |
|  | ENSRLO00000010354  | amibp         | alpha-3-microglobulin/fetuin precursor [Source:ZFIN:Acc:ZDB-GENE-040426-1608]                           | -0.591126349 | -0.516264281 | 3.315803841 | 3.241427344 |
|  | ENSRLO00000018066  | gpr135        | G protein-coupled receptor 135 [Source:ZFIN:Acc:ZDB-GENE-080429-3]                                      | 2.048964676  | 0.412981713  | 4.925746366 | 6.562212587 |
|  | ENSRLO00000009821  | dnah12        | dyx1c1, axonemal, heavy chain 12 [Source:ZFIN:Acc:ZDB-GENE-090311-9]                                    | 3.572128796  | 3.421684194  | 6.456386173 | 6.275052524 |
|  | ENSRLO00000006276  | mapk10        | mitogen-activated protein kinase 10 [Source:ZFIN:Acc:ZDB-GENE-051120-117]                               | 1.967960372  | -11.11969336 | 3.06108348  | 16.14924182 |
|  | ENSRLO00000015987  | zmp00000010   | zmp0000001088 [Source:ZFIN:Acc:ZDB-GENE-140106-48]                                                      | 12.55072755  | 11.11557692  | 3.20442438  | 4.64004998  |
|  | ENSRLO00000011890  | si:dkey-84k17 | dyx1c1, axonemal light chain 1 [Source:HGNC Symbol:Acc:HGNC:23247]                                      | -13.03710763 | 2.405196377  | 2.207857167 | 4.836757343 |
|  | ENSRLO00000015927  | -             | -                                                                                                       | 0.785201418  | 0.731137788  | 3.892178929 | 3.371730979 |
|  | ENSRLO00000010740  | wtf60         | WD repeat domain 60 [Source:ZFIN:Acc:ZDB-GENE-140821-1]                                                 | -0.289575124 | 0.097298665  | 4.207971712 | 3.84158235  |
|  | ENSRLO00000007564  | arf5a         | activating transcription factor 5a [Source:ZFIN:Acc:ZDB-GENE-060526-205]                                | 14.48636242  | 12.76468502  | 3.818409233 | 5.540553603 |
|  | ENSRLO00000006573  | lrca6         | leucine rich repeat containing 6 [Source:ZFIN:Acc:ZDB-GENE-040927-2]                                    | -0.781051192 | -1.239409177 | 3.764444057 | 4.223292524 |
|  | ENSRLO00000010523  | ztc38         | zebrafish testis-expressed 38 [Source:ZFIN:Acc:ZDB-GENE-060312-39]                                      | -0.690764072 | 0.10570803   | 5.679307519 | 4.88332018  |
|  | ENSRLO00000012847  | phactr3       | phosphatase and actin regulator 3 [Source:ZFIN:Acc:ZDB-GENE-101230-3]                                   | -0.527139836 | -1.214144637 | 3.47794989  | 4.165439657 |
|  | ENSRLO00000005723  | ano3          | anion channel 3 [Source:ZFIN:Acc:ZDB-GENE-111031-3]                                                     | 12.93519084  | 9.334250935  | 3.211071499 | 8.612480329 |
|  | ENSRLO00000009611  | TEK1          | tekin 1 [Source:HGNC Symbol:Acc:HGNC:15534]                                                             | 3.664374238  | 1.178479027  | 6.47617255  | 8.962556042 |
|  | ENSRLO00000018866  | tmem67        | transmembrane protein 67 [Source:NCBI gene:Acc:101188892]                                               | 0.568471834  | -0.268252095 | 3.145351361 | 3.982532918 |
|  | ENSRLO00000008841  | IT22          | intraflagellar transport 22 [Source:HGNC Symbol:Acc:HGNC:21895]                                         | -1.719087004 | -0.702350972 | 4.78497387  | 3.768722877 |
|  | ENSRLO00000017728  | IFT22         | intraflagellar transport 22 [Source:HGNC Symbol:Acc:HGNC:21895]                                         | -0.738742007 | 0.990135073  | 4.809380336 | 3.080646357 |
|  | ENSRLO00000001813  | catp7b        | calcium binding protein 7b [Source:ZFIN:Acc:ZDB-GENE-060526-566]                                        | 0.049230482  | -0.364151994 | 5.87966012  | 6.293259842 |
|  | ENSRLO00000016001  | -             | -                                                                                                       | 0            | 12.50391019  | 16.31295597 | 3.809517569 |
|  | ENSRLO00000009209  | -             | -                                                                                                       | 1.330234374  | -0.218290368 | 3.336068541 | 4.885096067 |
|  | ENSRLO00000011498  | -             | -                                                                                                       | 2.173898018  | 2.275432463  | 4.880094518 | 4.779043935 |
|  | ENSRLO00000015513  | ARL2BP        | ADP ribosylation factor like GTPase 2 binding protein [Source:HGNC Symbol:Acc:HGNC:17146]               | -2.46199679  | 1.529757335  | 7.331563827 | 3.340294496 |
|  | ENSRLO00000009053  | dnajb13       | DnaJ (Hsp40) homolog, subfamily B, member 13 [Source:ZFIN:Acc:ZDB-GENE-040910-4]                        | 3.272603099  | -0.170593156 | 7.531778077 | 10.19545578 |
|  | ENSRLO00000011540  | -             | -                                                                                                       | -0.188581318 | -1.29297636  | 3.843049277 | 4.949928482 |
|  | ENSRLO00000011581  | dotk3         | doublecortin-like kinase 3 [Source:ZFIN:Acc:ZDB-GENE-081104-224]                                        | 5.097075431  | 2.930037889  | 4.158241839 | 6.328806074 |
|  | ENSRLO00000014287  | -             | -                                                                                                       | 11.28463905  | 12.58543909  | 9.399375009 | 8.099042577 |
|  | ENSRLO000000005425 | zlf131a       | zona pellucida-like domain containing 1a [Source:ZFIN:Acc:ZDB-GENE-110411-91]                           | 0            | 0            | 15.84372996 | 15.84422689 |
|  | ENSRLO00000011164  | catip         | catipogenesis associated TTC17 interacting protein [Source:ZFIN:Acc:ZDB-GENE-060929-1170]               | -1.184216919 | -0.780239882 | 6.283198251 | 6.260101324 |
|  | ENSRLO00000012825  | -             | -                                                                                                       | -2.615902268 | -0.879282988 | 7.086329628 | 3.571627075 |
|  | ENSRLO00000015767  | myhpc1        | myosin binding protein C, slow type [Source:ZFIN:Acc:ZDB-GENE-041114-196]                               | 2.683929776  | 1.490600429  | 3.964171028 | 5.157995541 |
|  | ENSRLO00000006960  | -             | -                                                                                                       | -15.10488888 | -1.520889567 | 19.51836042 | 5.934772018 |
|  | ENSRLO00000006843  | dnaaf3        | dyx1c1, axonemal, assembly factor 3 like [Source:ZFIN:Acc:ZDB-GENE-150903-1]                            | 2.854905107  | 0.776927426  | 5.67951415  | 7.75797041  |
|  | ENSRLO00000013148  | cfap45        | cilia and flagella associated protein 45 [Source:ZFIN:Acc:ZDB-GENE-070209-143]                          | 6.761735121  | 3.4197195    | 4.374056678 | 8.715666678 |
|  | ENSRLO00000013420  | ncs1a         | neuronal calcium sensor 1 [Source:NCBI gene:Acc:101160077]                                              | -0.511859436 | 0.248256482  | 4.778018725 | 4.018386235 |
|  | ENSRLO00000004477  | SLCO1C1       | solute carrier organic anion transporter family member 1C1 [Source:HGNC Symbol:Acc:HGNC:13819]          | -1.468433907 | -1.02066089  | 4.479611808 | 4.032322815 |
|  | ENSRLO00000015571  | -             | -                                                                                                       | 1.064816157  | -0.124818003 | -3.44144271 | 4.621563415 |
|  | ENSRLO00000012056  | cfap300       | cilia and flagella associated protein 300 [Source:ZFIN:Acc:ZDB-GENE-040724-203]                         | -0.867963602 | 0.228289221  | 6.724650547 | 5.628882267 |
|  | ENSRLO00000014775  | prfakab       | protein kinase, cAMP-dependent, gamma1c, alpha genome duplicate b [Source:ZFIN:Acc:ZDB-GENE-040801-208] | -0.544298953 | 0.977914233  | 4.966341409 | 3.444613186 |

|  |                    |         |                                                                                           |              |              |              |              |
|--|--------------------|---------|-------------------------------------------------------------------------------------------|--------------|--------------|--------------|--------------|
|  | ENSRLO00000009047  | -       | -                                                                                         | -            | -            | -            | -            |
|  | ENSRLO000000050528 | trappc2 | trafficking protein particle complex 2 like [Source:NCBI gene:Acc:10117414]               | -3.700568845 | -0.038535956 | 8.12628022   | 4.464732001  |
|  | ENSRLO00000014793  | -       | -                                                                                         | -3.930077748 | 2.182517268  | 7.670198176  | 1.484857481  |
|  | ENSRLO00000014295  | -       | -                                                                                         | 3.002115426  | 0.108692828  | 4.277583127  | 1.166262065  |
|  | ENSRLO00000008081  | -       | -                                                                                         | 3.34993044   | -0.8889308   | 4.41039849   | 1.95397429   |
|  | ENSRLO00000006166  | elc5    | elongator complex subunit 5 [Source:ZFIN:Acc:ZDB-GENE-061215-33]                          | -4.97180688  | 0.902705573  | 5.85074882   | 0.02178598   |
|  | ENSRLO00000003718  | tusc2a  | tumor suppressor 2, mitochondrial calcium regulator [Source:NCBI gene:Acc:101169352]      | -3.584942537 | -0.535509032 | 4.066739836  | 1.017791611  |
|  | ENSRLO00000008147  | cdc115  | coiled-coil domain containing 115 [Source:ZFIN:Acc:ZDB-GENE-050227-20]                    | -16.76202122 | 3.174469241  | 19.04628249  | -0.889717879 |
|  | ENSRLO00000015816  | -       | -                                                                                         | -3.30876681  | -0.018649357 | 4.548293538  | 2.58659751   |
|  | ENSRLO00000009179  | fuom    | fucoxanthin biosynthetic pathway protein 1 [Source:ZFIN:Acc:ZDB-GENE-04101170455]         | -16.57850375 | -0.607762923 | 17.91127869  | 1.941028022  |
|  | ENSRLO000000006166 | elc5    | elongator complex subunit 5 [Source:ZFIN:Acc:ZDB-GENE-061215-33]                          | -4.662021904 | 0.253598502  | 4.622404292  | -0.292731319 |
|  | ENSRLO00000017293  | mett1b  | methyltransferase like 8 [Source:ZFIN:Acc:ZDB-GENE-041114-16]                             | -16.26336421 | 2.295508185  | 17.051812457 | -1.50655703  |
|  | ENSRLO00000012568  | myk4b   | myosin light chain kinase family, member 4b [Source:ZFIN:Acc:ZDB-GENE-041001-128]         | -15.76912629 | -2.990799513 | 11.59350784  | -1.184239176 |
|  | ENSRLO00000003200  | atpaf2  | ATP synthase mitochondrial F1 complex assembly factor 2 [Source:NCBI gene:Acc:101173128]  | -3.059820767 | 0.461675223  | 3.69629266   | 1.175201680  |
|  | ENSRLO00000008912  | ap2s1   | ap2-related protein complex 2, sigma 1 subunit [Source:ZFIN:Acc:ZDB-GENE-040426-2174]     | -3.848475918 | 1.293852013  | -3.848475918 | 0.984017851  |
|  | ENSRLO00000011191  | hirp3   | HIRA interacting protein 3 [Source:ZFIN:Acc:ZDB-GENE-050131-5753]                         | -4.539177179 | 0.539036011  | 5.170444298  | 0.09271541   |
|  | ENSRLO00000015648  | arfgap1 | ADP-ribosylation factor GTPase activating protein 1 [Source:ZFIN:Acc:ZDB-GENE-041114-130] | -3.142152558 | 0.889863614  | 4.983862614  | 0.982317553  |
|  | ENSRLO00000013371  | mana    | mannanase, endo-alpha [Source:ZFIN:Acc:ZDB-GENE-040912-87]                                | -3.012392715 | -0.545907789 | 1.377663946  | -1.08833604  |
|  | ENSRLO00000003357  | -       | -                                                                                         | -3.921235809 | 0.9735476    | 3.96876611   | 0.92551395   |
|  | ENSRLO00000008281  | lyar    | lysine antibody reactive [Source:NCBI gene:Acc:101172807]                                 | -4.08789308  | 1.120770616  | 5.507279974  | 0.299110984  |
|  | ENSRLO00000013816  | dup12   | dual specificity phosphatase 12 [Source:NCBI gene:Acc:101155145]                          | -3.058199644 | -0.113822464 | -0.113822464 | -2.931403009 |
|  | ENSRLO00000015648  | arfgap1 | ADP-ribosylation factor GTPase activating protein 1 [Source:ZFIN:Acc:ZDB-GENE-041114-130] | -3.142152558 | 0.889863614  | 4.983862614  | 0.982317553  |
|  | ENSRLO00000013371  | mana    | mannanase, endo-alpha [Source:ZFIN:Acc:ZDB-GENE-040912-87]                                | -3.012392715 | -0.545907789 | 1.377663946  | -1.08833604  |
|  | ENSRLO00000003357  | -       | -                                                                                         | -3.921235809 | 0.9735476    | 3.96876611   | 0.92551395   |
|  | ENSRLO00000008281  | lyar    | lysine antibody reactive [Source:NCBI gene:Acc:101172807]                                 | -4.08789308  | 1.120770616  | 5.507279974  | 0.299110984  |
|  | ENSRLO00000013816  | dup12   | dual specificity phosphatase 12 [Source:NCBI gene:Acc:101155145]                          | -3.058199644 | -0.113822464 | -0.113822464 | -2.931403009 |
|  | ENSRLO00000015648  | arfgap1 | ADP-ribosylation factor GTPase activating protein 1 [Source:ZFIN:Acc:ZDB-GENE-041114-130] | -3.142152558 | 0.889863614  | 4.983862614  | 0.982317553  |
|  | ENSRLO00000013371  | mana    | mannanase, endo-alpha [Source:ZFIN:Acc:ZDB-GENE-                                          |              |              |              |              |

|  |  |                    |           |                                                                                                       |              |              |             |             |  |
|--|--|--------------------|-----------|-------------------------------------------------------------------------------------------------------|--------------|--------------|-------------|-------------|--|
|  |  | ENSORLG0000009503  | -         | -                                                                                                     | -2.237513787 | -0.896117581 | 4.830313442 | 3.489401996 |  |
|  |  | ENSORLG0000004150  | catp2a    | calcium-binding protein 2 [Source:NCBI gene:Acc:101165211]                                            | 10.56470207  | 12.40596844  | 6.141588188 | 4.300765075 |  |
|  |  | ENSORLG0000007169  | hexa5     | hexosaminidase A (alpha polypeptide) [Source:ZFIN:Acc:ZDB-GENE-059417-283]                            | -0.45167883  | 0.17304801   | 5.668742015 | 5.04413318  |  |
|  |  | ENSORLG0000000762  | ccdk6b5   | coiled-coil domain containing 65 [Source:ZFIN:Acc:ZDB-GENE-030616-358]                                | 1.914341502  | -0.67823262  | 3.97924405  | 6.570893155 |  |
|  |  | ENSORLG00000012644 | -         | -                                                                                                     | 4.361760153  | 5.531543014  | 4.631167949 | 3.461876094 |  |
|  |  | ENSORLG00000014813 | -         | -                                                                                                     | -1.489975464 | -0.098557235 | 5.361121493 | 3.970187928 |  |
|  |  | ENSORLG0000000675  | -         | -                                                                                                     | 1.810954032  | 2.178252108  | 5.413221575 | 5.048607253 |  |
|  |  | ENSORLG00000011965 | -         | -                                                                                                     | 0            | 11.03365013  | 16.77118122 | 5.73800224  |  |
|  |  | ENSORLG00000009682 | -         | -                                                                                                     | -0.388978366 | 0.133677221  | 3.589717221 | 3.067546464 |  |
|  |  | ENSORLG00000004848 | dazl      | deleted in azoospermia like [Source:NCBI gene:Acc:100049418]                                          | 0.923292128  | 0.824423145  | 4.432967912 | 4.532321532 |  |
|  |  | ENSORLG00000012338 | mcrp1     | MAPK regulated co-repressor interacting protein 1 [Source:NCBI gene:Acc:101162213]                    | -0.548902445 | 0.376796059  | 4.222683477 | 3.297469921 |  |
|  |  | ENSORLG00000011618 | katna1    | katanin p60 ATPase-containing subunit A-like 1 [Source:NCBI gene:Acc:101163120]                       | -0.696709505 | -0.493743665 | 3.567735527 | 3.365254701 |  |
|  |  | ENSORLG00000000163 | -         | -                                                                                                     | -1.699507572 | -0.193518052 | 4.812329654 | 3.30682597  |  |
|  |  | ENSORLG00000012598 | bxd1      | B9 domain containing 1 [Source:NCBI gene:Acc:101164080]                                               | -1.894169991 | -0.174113646 | 5.577536305 | 3.857964734 |  |
|  |  | ENSORLG00000009732 | -         | -                                                                                                     | -9.734591084 | -9.73457415  | 19.04065055 | 19.04114727 |  |
|  |  | ENSORLG00000007125 | armcd9    | armadillo repeat containing 9 [Source:ZFIN:Acc:ZDB-GENE-100922-67]                                    | 0.411124829  | 0.513900629  | 4.54656476  | 4.257256669 |  |
|  |  | ENSORLG00000002854 | rab30     | RAB30, member RAS oncogene family [Source:NCBI gene:Acc:101172181]                                    | 1.615922746  | 1.090564247  | 3.257573295 | 3.783416601 |  |
|  |  | ENSORLG00000003841 | catp2b    | calcium binding protein 2b [Source:ZFIN:Acc:ZDB-GENE-081028-55]                                       | 11.14984871  | 0            | 5.238864586 | 16.39920446 |  |
|  |  | ENSORLG00000017033 | stk39     | serine threonine kinase 39 [Source:ZFIN:Acc:ZDB-GENE-145108-194]                                      | 1.412066537  | 1.311906668  | 3.801295267 | 3.301885661 |  |
|  |  | ENSORLG00000013913 | -         | -                                                                                                     | 3.230835514  | 2.005233288  | 3.783414643 | 5.009480186 |  |
|  |  | ENSORLG00000003818 | nchp1     | nephrocytin 1 [Source:NCBI gene:Acc:101156350]                                                        | 0.569756463  | -0.073584333 | 4.251103397 | 4.894928863 |  |
|  |  | ENSORLG00000010878 | WDR63     | WD repeat domain 63 [Source:HGNC Symbol:Acc:HGNC:30711]                                               | 2.616089379  | 0.690664333  | 4.06758275  | 9.99493791  |  |
|  |  | ENSORLG00000003775 | ZMYND10   | zinc finger MYND-type containing 10 [Source:HGNC Symbol:Acc:HGNC:19412]                               | 13.43180706  | 11.88016128  | 7.889764012 | 11.48718274 |  |
|  |  | ENSORLG00000013908 | -         | -                                                                                                     | -1.023313518 | 1.277926787  | 3.763986893 | 3.509839244 |  |
|  |  | ENSORLG00000005063 | arf6      | ADP-ribosylation factor-like 6 [Source:ZFIN:Acc:ZDB-GENE-041219-2]                                    | -4.470493051 | 2.164608636  | 9.744506108 | 3.109893772 |  |
|  |  | ENSORLG00000014143 | -         | -                                                                                                     | -1.27216492  | -1.144138645 | 5.674279307 | 5.546737828 |  |
|  |  | ENSORLG00000013903 | cer54b    | ceramide synthase 2 [Source:NCBI gene:Acc:101155637]                                                  | 1.093618747  | 1.409941709  | 3.992596448 | 3.676758138 |  |
|  |  | ENSORLG00000007661 | ARF3      | ADP ribosylation factor 3 [Source:HGNC Symbol:Acc:HGNC:654]                                           | 1.570673618  | -1.01797512  | 3.660589555 | 6.249718022 |  |
|  |  | ENSORLG00000000671 | -         | -                                                                                                     | 2.469676431  | 0.821128809  | 3.296485532 | 4.945518033 |  |
|  |  | ENSORLG00000017151 | klh41a    | kelch like family member 41 [Source:NCBI gene:Acc:101157898]                                          | 10.16239133  | 10.31865578  | 6.547190506 | 6.3914001   |  |
|  |  | ENSORLG00000006974 | -         | -                                                                                                     | 0            | 12.72181139  | 16.79703759 | 4.078989447 |  |
|  |  | ENSORLG00000003967 | -         | -                                                                                                     | -0.329260874 | 0.399170834  | 4.236280974 | 3.314464230 |  |
|  |  | ENSORLG00000006769 | -         | -                                                                                                     | -12.64601468 | 0.68907767   | 16.3879417  | 3.236494548 |  |
|  |  | ENSORLG00000004806 | -         | -                                                                                                     | -11.26436457 | -0.062684497 | 19.8780021  | 1.65689024  |  |
|  |  | ENSORLG00000007387 | ppp1r2    | protein phosphatase 1 regulatory inhibitor subunit 2 [Source:NCBI gene:Acc:101161720]                 | 0.574339862  | 0.50433153   | 3.371660441 | 3.442170305 |  |
|  |  | ENSORLG00000006609 | lfnc2     | Fanconi anemia complementation group E [Source:ZFIN:Acc:ZDB-GENE-060510-5]                            | -1.74809811  | -0.481354011 | 4.470088331 | 3.203829213 |  |
|  |  | ENSORLG00000009216 | nmr2      | N-myristoyltransferase 2 [Source:ZFIN:Acc:ZDB-GENE-090131-717]                                        | -1.816396806 | 0.27095662   | 5.331704562 | 6.428482262 |  |
|  |  | ENSORLG00000010328 | -         | -                                                                                                     | 2.811055991  | 2.284339108  | 7.406893306 | 7.934198044 |  |
|  |  | ENSORLG00000007266 | zpc194655 | NEDD8 [Source:NCBI gene:Acc:101170466]                                                                | 1.68716378   | 2.667445419  | 7.827632897 | 6.847835693 |  |
|  |  | ENSORLG00000009723 | dlnc1     | deleted in lung and esophageal cancer 1 [Source:ZFIN:Acc:ZDB-GENE-091204-65]                          | 14.35695259  | 12.11745155  | 4.49115924  | 6.771125549 |  |
|  |  | ENSORLG00000011128 | irc5c1    | leucine rich repeat containing 51 [Source:ZFIN:Acc:ZDB-GENE-060929-962]                               | 13.81355275  | 0            | 7.551810817 | 21.36585537 |  |
|  |  | ENSORLG00000009314 | top1      | DNA topoisomerase 1 [Source:NCBI gene:Acc:101160729]                                                  | 3.102763391  | 2.524867319  | 6.50938669  | 7.087744575 |  |
|  |  | ENSORLG00000009892 | tmem1071  | transmembrane protein 107 [Source:NCBI gene:Acc:101155271]                                            | -2.991084262 | 1.74567843   | 7.942643658 | 3.206365021 |  |
|  |  | ENSORLG00000017790 | ak7a      | adenylyl kinase 7a [Source:ZFIN:Acc:ZDB-GENE-040724-122]                                              | 2.763568812  | 0.759043665  | 4.51800174  | 5.623090289 |  |
|  |  | ENSORLG00000005337 | -         | -                                                                                                     | 2.417138722  | 1.088722233  | 3.82627259  | 5.155174327 |  |
|  |  | ENSORLG00000011086 | KCNK12    | potassium two pore domain channel subfamily K member 12 [Source:HGNC Symbol:Acc:HGNC:6274]            | -1.712499315 | -2.261460253 | 6.501120572 | 7.050594086 |  |
|  |  | ENSORLG00000012423 | -         | -                                                                                                     | 0            | 11.61020359  | 16.39977225 | 5.479042236 |  |
|  |  | ENSORLG00000013316 | -         | -                                                                                                     | -1.27946918  | -0.17654186  | 4.232839531 | 3.130418417 |  |
|  |  | ENSORLG00000006779 | sar1ab    | GTP-binding protein SAR1b [Source:NCBI gene:Acc:101153189]                                            | -1.260656037 | 0.69974061   | 6.194770863 | 4.248555776 |  |
|  |  | ENSORLG00000015824 | lysdn1    | LysM domain containing 1 [Source:NCBI gene:Acc:101166660]                                             | 0.310761623  | 1.723806504  | 4.691803789 | 3.279243676 |  |
|  |  | ENSORLG00000013466 | armc2     | armadillo repeat containing 2 [Source:ZFIN:Acc:ZDB-GENE-041034-7]                                     | 2.461455537  | -0.9812637   | 3.365630266 | 6.800834239 |  |
|  |  | ENSORLG00000012227 | -         | -                                                                                                     | 1.92017077   | 1.951497764  | 3.299682369 | 3.268839673 |  |
|  |  | ENSORLG00000000536 | icn       | ictacalcin [Source:ZFIN:Acc:ZDB-GENE-030131-8599]                                                     | 11.14502779  | 0            | 5.685789564 | 16.83128782 |  |
|  |  | ENSORLG00000005272 | mdh1b     | malate dehydrogenase 1B, NAD (soluble) [Source:ZFIN:Acc:ZDB-GENE-060289-384]                          | 2.243278795  | -0.454848049 | 4.27077389  | 6.975689184 |  |
|  |  | ENSORLG00000006856 | -         | -                                                                                                     | 5.73335056   | 0.26156749   | 4.085456869 | 9.557573145 |  |
|  |  | ENSORLG00000015479 | -         | -                                                                                                     | 13.8497286   | 0            | 6.544231363 | 20.38446172 |  |
|  |  | ENSORLG00000007297 | ribc1     | RIB43A domain with coiled-coils 1 [Source:ZFIN:Acc:ZDB-GENE-081031-7]                                 | 2.433185719  | -2.788305343 | 7.114052513 | 12.33602859 |  |
|  |  | ENSORLG00000006069 | -         | -                                                                                                     | 0            | 0            | 16.92176459 | 16.92226139 |  |
|  |  | ENSORLG00000009547 | bdgat5    | UDP-Gal4betaGlcNAc beta 1,4-galactosyltransferase, polyphosphate 5 [Source:ZFIN:Acc:ZDB-GENE-06028-3] | 3.85071927   | 3.044516291  | 3.90430067  | 4.710984732 |  |
|  |  | ENSORLG00000004838 | serpin2b  | serpin family F member 2 [Source:NCBI gene:Acc:101163835]                                             | 9.343385613  | 11.07921142  | 7.890544452 | 6.155188869 |  |
|  |  | ENSORLG00000011219 | -         | -                                                                                                     | 0            | 14.01119667  | 17.63226626 | 3.62139302  |  |
|  |  | ENSORLG00000002800 | -         | -                                                                                                     | 0.934664883  | 1.042157701  | 3.87475312  | 3.767746689 |  |
|  |  | ENSORLG00000006175 | -         | -                                                                                                     | 3.793504201  | -1.045839376 | 4.33717081  | 9.176979548 |  |
|  |  | ENSORLG00000011790 | -         | -                                                                                                     | -2.109128397 | -0.316700055 | 4.95033992  | 3.158935167 |  |

|  |  |                     |           |                                                                                       |              |              |              |              |  |
|--|--|---------------------|-----------|---------------------------------------------------------------------------------------|--------------|--------------|--------------|--------------|--|
|  |  | ENSORLG00000014826  | rip7a     | ribosomal RNA processing 7 homolog A [Source:NCBI gene:Acc:101157059]                 | -3.358723426 | 0.106142328  | 2.755189941  | -0.70874083  |  |
|  |  | ENSORLG000000006704 | -         | -                                                                                     | -3.335175806 | 2.99473009   | 4.550834538  | -1.778870808 |  |
|  |  | ENSORLG000000004143 | -         | -                                                                                     | -5.238217287 | 0.776760753  | 6.995565745  | 0.981072186  |  |
|  |  | ENSORLG000000006336 | cdc4c3    | coiled-coil domain containing 43 [Source:ZFIN:Acc:ZDB-GENE-040426-1587]               | -3.278646622 | -0.626647757 | 1.665071407  | -0.986421767 |  |
|  |  | ENSORLG000000006336 | -         | -                                                                                     | -5.209909104 | -0.565959863 | 3.798238402  | -0.842526057 |  |
|  |  | ENSORLG00000015812  | sidkeyp-9 | sidkeyp-9h10.5 [Source:ZFIN:Acc:ZDB-GENE-070912-693]                                  | -3.585196244 | -0.412940113 | 2.58892711   | -0.582643991 |  |
|  |  | ENSORLG00000014594  | -         | -                                                                                     | 4.272738411  | 0.352838241  | 2.358303527  | 2.201717276  |  |
|  |  | ENSORLG00000014700  | -         | -                                                                                     | -5.116812119 | 0.197268692  | 4.072278253  | -1.841195861 |  |
|  |  | ENSORLG000000004354 | HAUS1     | HAUS augmin like complex subunit 1 [Source:NCBI gene:Acc:101168876]                   | -3.89919474  | 0.51270437   | 4.88430777   | 0.472835515  |  |
|  |  | ENSORLG00000009765  | bicip     | BRCA2 and CDKN1A interacting protein [Source:NCBI gene:Acc:101165343]                 | -3.026251666 | 0.334576723  | 4.414084963  | 1.017477797  |  |
|  |  | ENSORLG00000007932  | ron2      | reticulocalbin 2 [Source:ZFIN:Acc:ZDB-GENE-050706-62]                                 | -6.15271044  | 0.246844943  | 5.682592825  | -0.716487649 |  |
|  |  | ENSORLG00000003851  | -         | -                                                                                     | -5.02829826  | 0.753413936  | 5.495717446  | -0.285508589 |  |
|  |  | ENSORLG000000080205 | ctsp3c    | CTD small phosphatase-like protein 2-B [Source:NCBI gene:Acc:101165797]               | -3.582510925 | -0.14020689  | 2.472561707  | -0.96295276  |  |
|  |  | ENSORLG00000013879  | yeast4    | YEATS domain containing 4 [Source:NCBI gene:Acc:101163215]                            | -16.6923086  | -2.176416702 | 12.99614685  | -0.91266793  |  |
|  |  | ENSORLG00000006650  | sidkeyp-2 | sidkeyp-2B9.1 [Source:ZFIN:Acc:ZDB-GENE-091204-297]                                   | -16.9223086  | -2.176416702 | 12.99614685  | -0.91266793  |  |
|  |  | ENSORLG00000013969  | EFNA2     | ephrin A2 [Source:HGNC Symbol:Acc:HGNC:3222]                                          | -3.175884632 | -0.98733918  | -6.031221529 | -2.819161425 |  |
|  |  | ENSORLG00000009402  | poc5      | POCS centrorial protein homolog (Chlamydomonas) [Source:ZFIN:Acc:ZDB-GENE-060526-135] | -3.043193217 | -0.162596546 | 3.633841673  | 0.753729927  |  |
|  |  | ENSORLG00000015185  | tango2    | transport and org organization 2 homolog [Source:NCBI gene:Acc:101156177]             | -3.544662166 | 0.907276645  | 4.964543076  | 0.517999101  |  |
|  |  | ENSORLG00000005711  | tm14a     | thioredoxin like 4A [Source:NCBI gene:Acc:101166315]                                  | -3.646737609 | 1.450105559  | -2.250282823 | 4.139301865  |  |
|  |  | ENSORLG00000006817  | -         | -                                                                                     | -3.55929673  | -0.252082823 | 4.139301865  | 0.83540011   |  |
|  |  | ENSORLG00000007900  | eloch     | elafin C [Source:NCBI gene:Acc:101173584]                                             | -6.28546008  | 2.301282756  | 7.569492667  | 1.052007032  |  |
|  |  | ENSORLG00000009440  | pdpr1     | P53 and DNA-damage regulated 1 [Source:ZFIN:Acc:ZDB-GENE-050417-276]                  | -3.62293006  | 1.337712167  | 4.995851425  | 0.036313026  |  |
|  |  | ENSORLG00000008400  | -         | -                                                                                     | -4.149318517 | -0.102921217 | 4.493770213  | -2.763454323 |  |
|  |  | ENSORLG0000001312   | -         | -                                                                                     | -6.49200242  | -0.86470164  | -9.631249825 | 15.2918604   |  |
|  |  | ENSORLG00000009577  | cenpn     | centromere protein N [Source:ZFIN:Acc:ZDB-GENE-020616-408]                            | -3.9         |              |              |              |  |

|                     |               |                                                                                                                       |              |              |             |              |
|---------------------|---------------|-----------------------------------------------------------------------------------------------------------------------|--------------|--------------|-------------|--------------|
| ENSORLG00000017147  | bbs5          | Bardet-Biedl syndrome 5 [Source:NCBI gene:Acc:101157654]                                                              | -6.584296987 | 1.943650135  | 12.4488449  | 3.921387551  |
| ENSORLG00000016684  | vsk2          | visual system homeobox 2 [Source:HGNC Symbol:Acc:HGNC:1975]                                                           | -1.350236885 | -1.549134089 | 5.296147199 | 5.495529635  |
| ENSORLG00000009299  | zgc:66426     | zgc:66426 [Source:ZFIN:Acc.ZDB-GENE-04026-1639]                                                                       | 0            | 13.09382192  | 19.9220941  | 6.698959124  |
| ENSORLG00000016146  | msh4          | mus81 homolog 4 [Source:ZFIN:Acc.ZDB-GENE-131121-643]                                                                 | 0.561546634  | 0.386154798  | 3.772979679 | 3.955156258  |
| ENSORLG00000007425  | fl140         | intraflagellar transport 140 homolog (Chlamydomonas) [Source:ZFIN:Acc.ZDB-GENE-04074-165]                             | -0.020701906 | 0.170319542  | 4.27473931  | 4.00890274   |
| ENSORLG000000013017 | flr88         | intraflagellar transport 88 homolog [Source:ZFIN:Acc.ZDB-GENE-030131-574]                                             | 0.264741962  | 0.76815854   | 4.112688491 | 3.60975596   |
| ENSORLG00000011934  | ttc1          | T-complex-associated testis-expressed 1 [Source:ZFIN:Acc.ZDB-GENE-120406-12]                                          | 1.836517773  | 0.31377957   | 4.847309183 | 6.372533337  |
| ENSORLG00000014513  | prnca         | prerolnucleoprotein [Source:NCBI gene:Acc:101168692]                                                                  | 1.933114989  | 0.991706932  | 3.366922527 | 4.308817021  |
| ENSORLG00000011654  | -             | -                                                                                                                     | -1.127506228 | -0.872614008 | 4.005613495 | 3.751206275  |
| ENSORLG00000004712  | sept3         | septin 3 [Source:ZFIN:Acc.ZDB-GENE-050522-375]                                                                        | 0.671821856  | -0.625976668 | 3.58072954  | 4.879011714  |
| ENSORLG000000012762 | -             | -                                                                                                                     | 2.552524679  | 2.218508434  | 5.263588823 | -            |
| ENSORLG00000004076  | sl:skey-46a10 | sl:skey-46a10 3 [Source:ZFIN:Acc.ZDB-GENE-030131-4610]                                                                | -0.586800341 | 1.853609529  | 6.173960127 | 7.374035241  |
| ENSORLG00000006860  | -             | -                                                                                                                     | 0.560080971  | 0.304174053  | 4.134116774 | 4.390508264  |
| ENSORLG000000014072 | -             | -                                                                                                                     | 1.187944865  | -0.214097663 | 3.012579563 | 4.415105449  |
| ENSORLG000000012477 | lzf11         | leucine zipper transcription factor like 1 [Source:NCBI gene:Acc:101165106]                                           | 0.285854971  | 0.875507081  | 4.892896219 | 4.303728734  |
| ENSORLG000000018223 | -             | -                                                                                                                     | 0            | 11.29023777  | 16.87051868 | 5.585248821  |
| ENSORLG000000017529 | scn3b         | sodium voltage-gated channel beta subunit 3 [Source:NCBI gene:Acc:101164293]                                          | 14.38464482  | 12.8322769   | 3.410833669 | 4.9636672    |
| ENSORLG00000001335  | sl:skey-42p14 | sl:skey-42p14 3 [Source:ZFIN:Acc.ZDB-GENE-041111-131]                                                                 | -11.97260291 | -1.054072011 | 20.62035118 | 9.702305162  |
| ENSORLG000000016407 | -             | -                                                                                                                     | 1.315100963  | -0.681066158 | 3.747690613 | 5.7443427    |
| ENSORLG000000007726 | -             | -                                                                                                                     | -0.39757602  | -0.156802616 | 4.90071004  | -            |
| ENSORLG00000003033  | zgc:66427     | E3 ubiquitin-protein ligase znf1 [Source:NCBI gene:Acc:101166334]                                                     | -0.549315898 | -0.203496295 | 4.2526803   | 3.907345608  |
| ENSORLG000000017409 | caona1e       | calcium channel, voltage-dependent, R type, alpha 1E subunit B [Source:ZFIN:Acc.ZDB-GENE-070705-133]                  | 0.242144928  | 0.810635617  | 3.605541601 | 3.037535892  |
| ENSORLG00000004928  | CCDC112       | coiled-coil domain containing 112 [Source:HGNC Symbol:Acc:HGNC:28599]                                                 | -2.953296883 | -0.12808923  | 3.411010245 | -            |
| ENSORLG00000004608  | arm4          | armadillo motif containing 4 [Source:ZFIN:Acc.ZDB-GENE-100316-7]                                                      | -0.336768889 | -1.654084104 | 3.142695567 | 4.460495718  |
| ENSORLG00000007235  | -             | -                                                                                                                     | 13.5958535   | 0            | 4.630191908 | 18.17028916  |
| ENSORLG00000007132  | arh1          | aradine ubiquitin-conjugating enzyme E2 binding protein homolog 1 (Drosophila) [Source:ZFIN:Acc.ZDB-GENE-030131-5213] | 0.526245145  | 0.541486911  | 3.074501429 | 3.059744806  |
| ENSORLG000000021700 | -             | -                                                                                                                     | 1.100257769  | 0.241712931  | 4.286218975 | 5.157248397  |
| ENSORLG00000008365  | -             | -                                                                                                                     | -1.19534526  | -0.33804008  | 6.255172694 | 5.993526863  |
| ENSORLG00000005906  | tmem134       | transmembrane protein 134 [Source:NCBI gene:Acc:101169517]                                                            | -0.745971112 | 0.977371689  | 4.933616318 | 3.210758471  |
| ENSORLG000000021050 | RF0100        | -                                                                                                                     | 2.377666534  | 1.443142445  | 7.17630914  | 6.652699954  |
| ENSORLG000000010213 | -             | -                                                                                                                     | 3.940742887  | 0.615816902  | 3.800546173 | 7.125958452  |
| ENSORLG00000003508  | -             | -                                                                                                                     | 12.31317498  | 12.67468     | 4.339371768 | 3.978336566  |
| ENSORLG000000017615 | pth1ra        | parathyroid hormone 1 receptor A [Source:ZFIN:Acc.ZDB-GENE-991123-8]                                                  | 11.34712304  | 9.791423397  | 4.542381473 | 6.098539988  |
| ENSORLG00000004334  | clafp298      | clia and flagella associated protein 298 [Source:NCBI gene:Acc:101166294]                                             | -2.197476727 | -0.019007506 | 3.433175021 | -            |
| ENSORLG00000009201  | znf511        | zinc finger protein 511 [Source:NCBI gene:Acc:101171189]                                                              | -0.493164648 | -0.00163964  | 5.11357129  | 4.622531126  |
| ENSORLG00000007763  | mustn1b       | musculoskeletal, embryonic nuclear protein 1b [Source:ZFIN:Acc.ZDB-GENE-111129-2]                                     | 0            | 13.17945351  | 16.31027816 | 3.131296611  |
| ENSORLG000000021118 | -             | -                                                                                                                     | -0.156057164 | -0.441648789 | 4.5884388   | 4.729139915  |
| ENSORLG00000008399  | ppp142        | protein phosphatase 1, regulatory subunit 42 [Source:ZFIN:Acc.ZDB-GENE-040704-43]                                     | -1.055738143 | 1.887134009  | 7.333863104 | 4.391476422  |
| ENSORLG00000004669  | -             | -                                                                                                                     | 6.778002959  | -0.04827005  | 3.912229396 | 10.73899861  |
| ENSORLG00000006542  | btc           | betacellulin, epidermal growth factor family member [Source:ZFIN:Acc.ZDB-GENE-050311-1]                               | 14.80091355  | 12.29606444  | 3.93201227  | 6.437329577  |
| ENSORLG000000016469 | nmef8         | NME/NM23 family member 8 [Source:ZFIN:Acc.ZDB-GENE-070410-39]                                                         | 4.206635881  | 2.55733052   | 6.25053423  | 7.904482905  |
| ENSORLG00000009132  | -             | -                                                                                                                     | -0.698185271 | 0.38970061   | 6.071649961 | 4.984248816  |
| ENSORLG000000062403 | sic16a4       | solute carrier family 16, member 4 [Source:ZFIN:Acc.ZDB-GENE-070112-602]                                              | 3.670347415  | 0.785031551  | 3.689888009 | 6.5756672    |
| ENSORLG000000021749 | arfap3        | ADP-ribosylation factor GTPase activating protein 3 [Source:ZFIN:Acc.ZDB-GENE-04026-1]                                | 0.89616073   | 2.834667708  | 6.716326918 | 4.772760304  |
| ENSORLG00000005533  | qub           | IQ motif and ubiquitin domain containing [Source:ZFIN:Acc.ZDB-GENE-110421-1]                                          | -1.455884573 | 0.857970195  | 8.935074066 | 6.621704273  |
| ENSORLG000000015169 | tmem231       | transmembrane protein 231 [Source:NCBI gene:Acc:101188706]                                                            | -0.200312506 | -0.546220963 | 3.633830827 | 3.979778496  |
| ENSORLG000000014757 | gpn4b         | glutathione peroxidase 4b [Source:ZFIN:Acc.ZDB-GENE-030410-3]                                                         | 0.31019425   | 1.26993022   | 4.553030225 | 3.59806138   |
| ENSORLG00000015052  | hamp          | hepcidin [Source:NCBI gene:Acc:101157971]                                                                             | 2.570589016  | -0.700749257 | 3.12616376  | 6.404439343  |
| ENSORLG00000003910  | sl:skey-1832  | sl:skey-1832 10 [Source:ZFIN:Acc.ZDB-GENE-130530-729]                                                                 | -0.310273143 | 0.74636364   | 5.021196366 | 3.965047348  |
| ENSORLG00000012011  | -             | -                                                                                                                     | 1.770555238  | -11.02194465 | 9.152983248 | 21.945989474 |
| ENSORLG000000010952 | zgc:110197    | ADP-ribosylation factor like GTPase 3 [Source:NCBI gene:Acc:101172267]                                                | -0.404633673 | -0.388662933 | 3.790240074 | 3.774718193  |
| ENSORLG000000010819 | UBE2H (1 of m | ubiquitin-conjugating enzyme E2 H [Source:NCBI gene:Acc:101163973]                                                    | -0.382590972 | 0.003399523  | 3.55331404  | 3.167818308  |
| ENSORLG000000012324 | lamn92a1      | family with sequence similarity 92, member A1 [Source:ZFIN:Acc.ZDB-GENE-048091-123]                                   | 1.228697523  | 0.25415346   | 3.853306026 | 4.808389585  |
| ENSORLG00000003919  | -             | -                                                                                                                     | 0            | 9.620787992  | 15.85480022 | 6.234490692  |
| ENSORLG000000011047 | -             | -                                                                                                                     | 2.210268322  | 0.570144114  | 6.397671424 | 8.038280296  |
| ENSORLG00000006352  | catn2         | cattractin [Source:NCBI gene:Acc:101170769]                                                                           | 0.627285987  | 0.250027435  | 4.342204735 | 4.71997338   |
| ENSORLG00000000870  | -             | -                                                                                                                     | 7.82927881   | 3.94375882   | 3.921329883 | 7.206045265  |
| ENSORLG000000012054 | -             | -                                                                                                                     | 0.623154516  | 0.456609811  | 3.036915653 | 3.203945189  |
| ENSORLG000000011017 | efcab1        | E(1F)hand calcium binding domain 1 [Source:ZFIN:Acc.ZDB-GENE-040914-40]                                               | -2.881476786 | 2.064948774  | 10.61574663 | 5.668908849  |
| ENSORLG000000016634 | -             | -                                                                                                                     | -0.761206984 | 0.002012381  | 4.123773962 | 3.162925506  |

|                     |           |                                                                                                  |              |              |              |              |
|---------------------|-----------|--------------------------------------------------------------------------------------------------|--------------|--------------|--------------|--------------|
| ENSORLG00000000931  | ube2a     | ubiquitin conjugating enzyme E2 A [Source:NCBI gene:Acc:101158032]                               | -3.438124818 | 2.957552634  | 5.749674532  | -0.645517655 |
| ENSORLG00000003488  | -         | -                                                                                                | -            | -            | -            | -            |
| ENSORLG000000004681 | C18orf32  | cell death activator CIDE-A [Source:NCBI gene:Acc:101159391]                                     | -3.910928089 | -0.424786265 | 1.008821655  | -2.476905729 |
| ENSORLG00000000584  | glo4a     | chromosome 18 open reading frame 32 [Source:HGNC Symbol:Acc:HGNC:31639]                          | -6.070982275 | 2.019765498  | 8.906289512  | 0.116722805  |
| ENSORLG000000003701 | zgc:11418 | phospholipase domain containing 4 [Source:ZFIN:Acc.ZDB-GENE-040912-38]                           | -5.617867491 | 0.105636914  | -            | 0.932901114  |
| ENSORLG00000001785  | gsk2      | glycolytic non-specific dipeptidase [Source:NCBI gene:Acc:101170951]                             | -4.618399714 | -2.662539746 | 0.631461672  | -0.869405082 |
| ENSORLG00000009727  | -         | -                                                                                                | -            | -            | -            | -            |
| ENSORLG00000007765  | sat2b     | saturated acetyltransferase 2 [Source:NCBI gene:Acc:10174286]                                    | -3.772223707 | -0.452373088 | 1.25164161   | -2.06772409  |
| ENSORLG00000011383  | coa3a     | cytochrome C oxidase assembly factor 3a [Source:ZFIN:Acc.ZDB-GENE-060810-187]                    | -3.296000119 | -0.424552389 | 4.231018517  | 1.36005591   |
| ENSORLG000000007712 | gnt6tq    | N-acetylglucosaminyl-1-phosphate transferase, gamma subunit [Source:ZFIN:Acc.ZDB-GENE-040625-10] | -3.387111035 | 0.808952363  | 3.400520672  | -0.795057775 |
| ENSORLG000000015856 | llph      | LLP homolog, long-term synaptic facilitation factor [Source:NCBI gene:Acc:101155243]             | -7.845821223 | 1.943314541  | 8.0268977    | -1.761747927 |
| ENSORLG00000017208  | ssb       | Sjogren syndrome antigen B (autoantigen Ia) [Source:ZFIN:Acc.ZDB-GENE-030131-223]                | -6.921206465 | 0.374877684  | 6.991446606  | -0.304152446 |
| ENSORLG00000002158  | map2k5    | mitogen-activated protein kinase kinase 5 [Source:ZFIN:Acc.ZDB-GENE-030131-1517]                 | -5.254284304 | 0.67864917   | 5.641611282  | -0.290837535 |
| ENSORLG000000006235 | usp39     | ubiquitin specific peptidase 39 [Source:NCBI gene:Acc:101161161]                                 | -3.671367975 | 0.816420603  | 5.373646548  | 0.886243155  |
| ENSORLG00000006428  | -         | -                                                                                                | -            | -            | -            | -            |
| ENSORLG00000001829  | -         | -                                                                                                | -            | -            | -            | -            |
| ENSORLG000000010497 | lysm2d3   | lysoM, putative peptidoglycan-binding domain containing 3 [Source:ZFIN:Acc.ZDB-GENE-048265-88]   | -3.202274475 | 0.947206398  | 4.608335368  | 0.459343538  |
| ENSORLG00000001527  | zgc:16283 | zgc:16283 [Source:ZFIN:Acc.ZDB-GENE-070410-94]                                                   | -3.393178298 | -0.777565401 | 3.68877735   | 1.083649278  |
| ENSORLG00000003929  | HABP4     | Hyaluronan binding protein 4 [Source:HGNC Symbol:Acc:HGNC:7062]                                  | -3.380152139 | 0.818017177  | 3.787039986  | -0.414694359 |
| ENSORLG000000010466 | gabrb1b   | gamma-aminobutyric acid (GABA) B receptor, 1b [Source:ZFIN:Acc.ZDB-GENE-060503-5]                | -3.471214014 | -0.036576632 | 3.202079273  | -0.233073201 |
| ENSORLG00000009433  | rgrb      | RPE-retinal G protein-coupled receptor [Source:NCBI gene:Acc:101162976]                          | -4.424658843 | -2.781742158 | -0.466940671 | -2.193742031 |
| ENSORLG000000014721 | -         | -                                                                                                | -            | -            | -            | -            |
| ENSORLG000000013967 | -         | -                                                                                                | -            | -            | -            | -            |
| ENSORLG000000012944 | -         | -                                                                                                | -            | -            | -            | -            |
| ENSORLG000000021421 | RF0019    | U6atac minor spliceosomal RNA [Source:NCBI gene:Acc:11947495]                                    | -6.683410599 | 0.817586989  | 7.167127298  | 1.666614866  |
| ENSORLG00000004878  | ubif51    | ubiquitin family domain containing 1 [Source:NCBI gene:Acc:101171414]                            | -4.132480774 | 0.924475632  | 6.527780575  | 1.471308909  |
| ENSORLG000000014001 | chnp1r1   | CTD nuclear envelope phosphatase 1 regulatory subunit 1 [Source:NCBI gene:Acc:101165466]         | -4.147202646 | 1.843014307  | 5.824578665  | -0.165153228 |
| ENSORLG000000011006 | rbm48     | RNA binding motif protein 48 [Source:NCBI gene:Acc:101176099]                                    | -0.462007955 | -0.243920876 | 4.902492911  | 1.086629265  |
| ENSORLG000000004347 | tas1r2a   | Tas1ras taste receptor, type 1, member 2a (tas1r2a), mRNA [Source:RefSeq mRNA:Acc:NM_01104839]   | -3.813760597 | 1.408498676  | 5.434345672  | -0.125151537 |
| ENSORLG00000001898  | -         | -                                                                                                | -            | -            | -            | -            |
| ENSORLG00000002592  | -         | -                                                                                                | -            | -            | -            | -            |
| ENSORLG000000013767 | -         | -                                                                                                | -            | -            | -            | -            |
| ENSORLG00000002580  | sich211   | Sich211, putative uncharacterized protein DB, G0292636 [Source:NCBI gene:Acc:105355500]          | -4.027628075 | 1.029562983  | 5.686071339  | -1.599854045 |
| ENSORLG00000004675  | -         | -                                                                                                | -            | -            | -            | -            |
| ENSORLG000000014415 | -         | -                                                                                                | -            | -            | -            | -            |
| ENSORLG000000014415 | -         | -                                                                                                | -            | -            | -            | -            |
| ENSORLG000000069911 | sich211   | Sich211, putative uncharacterized protein DB, G0292636 [Source:NCBI gene:Acc:105355500]          | -4.161510721 | -0.618942451 | 1.983787381  | -1.558314405 |
| ENSORLG000000005485 | -         | -                                                                                                | -            | -            | -            | -            |
| ENSORLG000000004476 | gpc2      | glycophorin C [Source:ZFIN:Acc.ZDB-GENE-050302-311]                                              | -4.298586826 | 1.791634298  | 5.749462301  | -0.337539877 |
| ENSORLG00000009118  | dmr1      | DM1 dimethyladenosine transferase 1 homolog [Source:NCBI gene:Acc:101156415]                     | -5.33544721  | 1.242242793  | 6.715424805  | 0.138040661  |
| ENSORLG000000020076 | -         | -                                                                                                | -            | -            | -            | -            |
| ENSORLG000000001420 | -         | -                                                                                                | -            |              |              |              |

|  |                     |              |                                                                                                    |              |              |             |             |
|--|---------------------|--------------|----------------------------------------------------------------------------------------------------|--------------|--------------|-------------|-------------|
|  | ENSRGLG0000000159   | -            | -                                                                                                  | 0.310550588  | -0.932976655 | 4.459688489 | 5.703700584 |
|  | ENSRGLG0000000167   | -            | -                                                                                                  | 13.6810216   | 9.220329955  | 5.787329444 | 10.03556913 |
|  | ENSRGLG00000005603  | lam102ba     | protein FAM102B [Source:NCBI gene:Acc:101166419]                                                   | 2.036688775  | 0.669695922  | 3.55817554  | 4.903975821 |
|  | ENSRGLG00000002017  | -            | -                                                                                                  | 0.584723797  | 1.816721324  | 4.134274649 | 3.082762268 |
|  | ENSRGLG00000009943  | mon5         | MORN repeat containing 5 [Source:ZFIN:Acc:ZDB-GENE-050522-267]                                     | 0            | 0            | 18.94431738 | 18.94431738 |
|  | ENSRGLG00000004695  | -            | -                                                                                                  | 1.163779148  | 0.800414452  | 4.201015286 | 4.564664919 |
|  | OSCP1               | -            | -                                                                                                  | 0.94527191   | 0.093740282  | 4.592892992 | 3.5542755   |
|  | ENSRGLG00000000020  | -            | -                                                                                                  | -0.57465548  | 0.05245516   | 4.475676056 | 3.849502676 |
|  | ENSRGLG00000017939  | rsph3        | retinal-specific homeobox 3 [Source:ZFIN:Acc:ZDB-GENE-040724-173]                                  | 1.821241038  | 0.936297189  | 4.572945405 | 5.45640211  |
|  | ENSRGLG00000000857  | -            | -                                                                                                  | 0.806834729  | -2.811101654 | 9.248522133 | 12.86694307 |
|  | ENSRGLG00000007896  | zrom1b       | prominin 1 b [Source:ZFIN:Acc:ZDB-GENE-031003-1]                                                   | 0.378517559  | 0.450681635  | 3.53094735  | 3.459268516 |
|  | ENSRGLG00000017164  | -            | -                                                                                                  | 0.224064101  | 0.256765322  | 4.53659513  | 4.48478542  |
|  | ENSRGLG00000008553  | MNS1         | meiosis specific nuclear structural 1 [Source:HGNC Symbol:Acc:HGNC:29636]                          | -2.239907802 | -0.506634974 | 5.102818936 | 3.730208963 |
|  | ENSRGLG00000010716  | -            | -                                                                                                  | 0            | 0            | 11.99420845 | 16.63897201 |
|  | ENSRGLG00000015982  | -            | -                                                                                                  | 2.1104091    | -0.33969534  | 3.571723341 | 6.07976171  |
|  | ENSRGLG00000006443  | teob1        | -                                                                                                  | 1.793801899  | 0.88690511   | 3.84082492  | 4.748304444 |
|  | ENSRGLG00000001688  | teob1        | teobin beta [Source:ZFIN:Acc:ZDB-GENE-041212-16]                                                   | -1.233666339 | 0.854263778  | 5.395573141 | 3.508127803 |
|  | ENSRGLG00000020999  | RF00003      | U1 splicesome RNA [Source:NCBI gene:Acc:111948514]                                                 | 1.990528415  | 0.533096419  | 3.21957947  | 4.45528283  |
|  | ENSRGLG00000021355  | RF00012      | small nuclear RNA U2 [Source:NCBI gene:Acc:111946355]                                              | -12.65261197 | -0.121419746 | 17.01274702 | 4.689074477 |
|  | ENSRGLG00000007136  | zpc-172182   | zpc172182 [Source:ZFIN:Acc:ZDB-GENE-080204-56]                                                     | -9.529664802 | 3.64313555   | 19.10147557 | 5.929166677 |
|  | ENSRGLG00000000450  | -            | -                                                                                                  | 1.84075735   | -0.317073151 | 4.22366395  | 6.381981512 |
|  | ENSRGLG00000002160  | -            | -                                                                                                  | 2.568272861  | 2.613184171  | 4.483789019 | 4.439336116 |
|  | ENSRGLG00000009343  | drc3         | dymin regulatory complex subunit 3 [Source:ZFIN:Acc:ZDB-GENE-061103-349]                           | 0            | 11.22629778  | 17.9394744  | 6.71353562  |
|  | ENSRGLG00000003037  | sacs         | sacsin molecular chaperone [Source:NCBI gene:Acc:101168896]                                        | 0.786191277  | 3.324219386  | 6.032566443 | 3.495051123 |
|  | ENSRGLG000000009063 | trtp13       | thyroid hormone receptor interactor 13 [Source:ZFIN:Acc:ZDB-GENE-040216-1498]                      | 0.318856836  | 0.75642516   | 4.041475641 | 3.605174939 |
|  | ENSRGLG00000012827  | -            | -                                                                                                  | 1.210669368  | 0.891890323  | 3.048933746 | 3.368198014 |
|  | ENSRGLG00000007856  | -            | -                                                                                                  | 1.233239618  | 0.072014696  | 3.682082056 | 4.843791854 |
|  | ENSRGLG000000015988 | nek4         | NIMA-related kinase 4 [Source:ZFIN:Acc:ZDB-GENE-040426-1382]                                       | -0.975977483 | -0.681514919 | 4.026214458 | 3.758636968 |
|  | ENSRGLG00000021250  | -            | -                                                                                                  | -1.409295531 | 0.573777138  | 5.106348957 | 3.132133011 |
|  | ENSRGLG000000021612 | -            | -                                                                                                  | 2.451518607  | -0.048252502 | 3.447879318 | 5.94813574  |
|  | ENSRGLG00000003926  | -            | -                                                                                                  | 1.030672941  | -0.287152768 | 3.566036356 | 4.87439673  |
|  | ENSRGLG000000014620 | dna11        | dymin, axonemal, light intermediate chain 1 [Source:ZFIN:Acc:ZDB-GENE-080204-7]                    | -1.000940084 | 1.558267693  | 9.846190775 | 7.287461397 |
|  | ENSRGLG000000004754 | tmc6b        | transmembrane and coiled-coil domains 6 [Source:ZFIN:Acc:ZDB-GENE-070410-47]                       | -0.272946713 | 0.02296856   | 3.326318877 | 3.038909033 |
|  | ENSRGLG00000003871  | ccna1        | cyclin A1 [Source:ZFIN:Acc:ZDB-GENE-040311-2]                                                      | -0.487220831 | -0.742218655 | 5.529521526 | 5.58055905  |
|  | ENSRGLG000000004911 | ttf9         | tubulin tyrosinase ligase-like family, member 9 [Source:ZFIN:Acc:ZDB-GENE-030131-1582]             | -0.710696304 | 0.858921915  | 6.612904182 | 5.522770089 |
|  | ENSRGLG000000021030 | RF00004      | U2 splicesome RNA [Source:NCBI gene:Acc:111946355]                                                 | -0.987374748 | 0.513139111  | 7.595025338 | 6.095002041 |
|  | ENSRGLG000000001345 | -            | -                                                                                                  | 4.366192483  | 2.120276279  | 4.994262279 | 6.230721502 |
|  | ENSRGLG000000017096 | -            | -                                                                                                  | -3.078541521 | -0.97956387  | 6.150307317 | 4.051814748 |
|  | ENSRGLG00000009082  | utp2         | uncoupling protein 2 [Source:NCBI gene:Acc:101160821]                                              | 5.815893103  | -0.32550341  | 3.699897217 | 9.84158907  |
|  | ENSRGLG00000007822  | -            | -                                                                                                  | 11.32483872  | 12.7857573   | 5.524704315 | 4.064234248 |
|  | ENSRGLG000000015702 | -            | -                                                                                                  | 0.889404261  | 0.910846835  | 3.27979793  | 3.258940022 |
|  | ENSRGLG000000008483 | mon3         | MORN repeat containing 3 [Source:ZFIN:Acc:ZDB-GENE-050417-152]                                     | -0.81323479  | 0.465053944  | 7.226097333 | 5.948293596 |
|  | ENSRGLG00000001334  | -            | -                                                                                                  | 0.878810976  | 2.797289206  | 6.0204054   | 4.104110386 |
|  | ENSRGLG00000014836  | zfp16        | zfp16 [Source:ZFIN:Acc:ZDB-GENE-050522-70]                                                         | 0.223480641  | 1.149608261  | 7.031120016 | 6.105477111 |
|  | ENSRGLG000000016854 | kss1rb       | RGS1 receptor b [Source:ZFIN:Acc:ZDB-GENE-060526-54]                                               | 12.14012996  | 12.34226361  | 3.862205234 | 3.666040246 |
|  | ENSRGLG000000009684 | CUJAP1       | clutrin associated protein 1 [Source:HGNC Symbol:Acc:HGNC:19009]                                   | -1.694313096 | -0.37951079  | 5.74624704  | 4.460147765 |
|  | ENSRGLG00000005660  | -            | -                                                                                                  | 1.454204853  | 3.763060896  | 5.727454484 | 3.41907971  |
|  | ENSRGLG000000014489 | -            | -                                                                                                  | -1.041668875 | 0.453453646  | 4.815782337 | 3.321148826 |
|  | ENSRGLG000000011051 | mlcn         | sodium leak channel, non-selective [Source:ZFIN:Acc:ZDB-GENE-050410-12]                            | 2.173951653  | 2.004268632  | 3.042129171 | 3.21229826  |
|  | ENSRGLG000000017932 | -            | -                                                                                                  | -9.875810774 | 4.295465836  | 17.60951734 | 3.438728588 |
|  | ENSRGLG000000012981 | efhc1        | EF-hand domain (C-terminal) containing 1 [Source:ZFIN:Acc:ZDB-GENE-040426-1300]                    | 4.229684936  | 1.124045312  | 8.405610092 | 11.51157823 |
|  | ENSRGLG000000005654 | mf165a       | ring finger protein 165a [Source:ZFIN:Acc:ZDB-GENE-091118-64]                                      | 4.117751591  | 1.146614176  | 3.848408589 | 6.456230634 |
|  | ENSRGLG00000015555  | -            | -                                                                                                  | 0.072154876  | -0.42755535  | 3.457801588 | 3.597988827 |
|  | ENSRGLG000000000161 | -            | -                                                                                                  | -1.165065662 | 1.722804914  | 6.048068079 | 3.10686563  |
|  | ENSRGLG000000006061 | sidkey-14018 | sidkey-14018 2 [Source:ZFIN:Acc:ZDB-GENE-060503-145]                                               | -1.06340819  | 2.220457567  | 8.387651614 | 5.48280606  |
|  | ENSRGLG00000007690  | -            | -                                                                                                  | -1.169502716 | -0.216071301 | 5.138044098 | 4.185102418 |
|  | ENSRGLG000000050714 | slc2a5       | solute carrier family 2, facilitated glucose transporter member 5 [Source:NCBI gene:Acc:101154948] | 3.56852988   | -0.943998138 | 3.157638038 | 7.670655021 |
|  | ENSRGLG00000003981  | enrh3        | glutamate-rich 3 [Source:ZFIN:Acc:ZDB-GENE-070209-29]                                              | 1.69371755   | -2.2857895   | 3.645243413 | 7.62561268  |
|  | ENSRGLG000000010918 | ak7b         | selenate kinase 7b [Source:ZFIN:Acc:ZDB-GENE-050309-170]                                           | 3.685825925  | 0.492212194  | 3.643056036 | 6.837156587 |
|  | ENSRGLG000000011039 | FT122        | intraflagellar transport 122 [Source:HGNC Symbol:Acc:HGNC:13956]                                   | -0.156911048 | -0.229896664 | 4.077102436 | 4.150366182 |
|  | ENSRGLG00000006044  | synp2b       | synaptophysin-like 2b [Source:ZFIN:Acc:ZDB-GENE-050417-309]                                        | 0.760702566  | 1.781258257  | 4.70460318  | 3.68453787  |
|  | ENSRGLG00000011792  | daw1         | dymin assembly factor with WD repeat domains 1 [Source:ZFIN:Acc:ZDB-GENE-050419-255]               | 4.91849904   | -0.99663453  | 4.226286852 | 10.14189956 |
|  | ENSRGLG000000015815 | ttb1         | intraflagellar transport 81 [Source:NCBI gene:Acc:101160565]                                       | 0.810257298  | -0.158306322 | 3.288033453 | 4.257081954 |
|  | ENSRGLG00000005637  | -            | -                                                                                                  | 3.767234039  | 1.818275975  | 4.107994863 | 6.057432265 |
|  | ENSRGLG000000012755 | -            | -                                                                                                  | 10.2481885   | 0            | 6.18308345  | 16.56670874 |
|  | ENSRGLG00000002502  | slc11h1-220a | enkurin domain containing 1 [Source:HGNC Symbol:Acc:HGNC:29246]                                    | 1.37949899   | -1.71926599  | 4.564095918 | 7.114457567 |
|  | ENSRGLG00000003997  | nm1k         | NM1 serine/threonine protein kinase [Source:NCBI gene:Acc:101164566]                               | 1.278452273  | 1.196642742  | 3.08399321  | 3.16598959  |

|  |                      |          |                                                                                                          |              |              |              |              |
|--|----------------------|----------|----------------------------------------------------------------------------------------------------------|--------------|--------------|--------------|--------------|
|  | ENSRGLG00000016473   | ACYP1    | acetylcholinesterase 1 [Source:HGNC Symbol:Acc:HGNC:29075]                                               | -3.181482253 | 2.625466449  | 3.899697859  | -1.909485036 |
|  | ENSRGLG000000005814  | rap1ab   | RAP1A, member of RAS oncogene family b [Source:ZFIN:Acc:ZDB-GENE-040426-2798]                            | -3.031272539 | -0.347636391 | 2.053703067  | -0.629448093 |
|  | ENSRGLG00000002759   | ftxoa3   | F-box protein 43 [Source:ZFIN:Acc:ZDB-GENE-040426-1645]                                                  | -3.678916419 | -0.035300022 | 2.649023681  | 1.049611107  |
|  | ENSRGLG00000001338   | HIST2H3A | histone H3 [Source:NCBI gene:Acc:101166976]                                                              | -3.793674607 | -1.387692509 | 3.677943509  | 1.247484019  |
|  | ENSRGLG00000000923   | cyf5b    | cytochrome b5 [Source:NCBI gene:Acc:101155998]                                                           | -3.345407267 | 0.847491714  | 4.440744474  | 0.248303212  |
|  | ENSRGLG000000008191  | -        | -                                                                                                        | -3.154549667 | 0.239897819  | 2.412218788  | -0.861543984 |
|  | ENSRGLG00000000334   | usp16    | ubiquitin specific peptidase 16 [Source:ZFIN:Acc:ZDB-GENE-030311-4153]                                   | -4.856042031 | 0.040521248  | 3.503443103  | -1.392674796 |
|  | ENSRGLG000000000004  | -        | -                                                                                                        | -4.417916163 | 0.175736439  | 2.445834726  | -2.147329246 |
|  | ENSRGLG000000012430  | churc1   | churchill domain containing 1 [Source:NCBI gene:Acc:101169830]                                           | -6.583393728 | 1.254268271  | 8.448592411  | 0.613614241  |
|  | ENSRGLG0000000017809 | trapp2   | trafficking protein particle complex 2 [Source:NCBI gene:Acc:101168660]                                  | -4.8543573   | 2.895500076  | 7.335405651  | -0.418989004 |
|  | ENSRGLG00000007788   | -        | -                                                                                                        | -3.649263022 | 0.866434588  | 5.15518323   | 6.380616144  |
|  | ENSRGLG000000012083  | -        | -                                                                                                        | -15.99427034 | -2.264786982 | 11.8606199   | 2.088311167  |
|  | ENSRGLG000000014303  | -        | -                                                                                                        | -4.072724479 | -1.631343428 | -0.229083289 | -2.66938852  |
|  | ENSRGLG0000000008134 | -        | -                                                                                                        | -0.09602475  | -4.658950663 | 5.038062075  | 0.275641072  |
|  | ENSRGLG00000007964   | tsam3a   | tetraspanin-3 [Source:NCBI gene:Acc:101170088]                                                           | 0.090017859  | -4.494222295 | -2.35440775  | 1.432580758  |
|  | ENSRGLG000000009825  | -        | -                                                                                                        | -1.891497115 | -3.505958203 | -2.445496972 | 2.063144902  |
|  | ENSRGLG000000006632  | FAM189A  | family with sequence similarity 189 member A1 [Source:HGNC Symbol:Acc:HGNC:29075]                        | -2.835776305 | -16.04110127 | 0.032521316  | 13.23835547  |
|  | ENSRGLG000000011838  | slc2a3b  | solute carrier family 2 (facilitated glucose transporter), member 3b [Source:ZFIN:Acc:ZDB-GENE-121031-5] | -2.541991047 | -5.251484045 | 1.944097701  | 4.64507948   |
|  | ENSRGLG000000000717  | -        | -                                                                                                        | 0.39045508   | -4.181440695 | -0.78107236  | 3.791380171  |
|  | ENSRGLG000000011521  | -        | -                                                                                                        | 0.904684098  | -3.807140313 | 0.323294504  | 5.054361933  |
|  | ENSRGLG000000005501  | pgcb5    | pgcb5, RNA transposable element derived 5 [Source:ZFIN:Acc:ZDB-GENE-040724-229]                          | -0.40979497  | -3.621949237 | -3.621949237 | 2.791152923  |
|  | ENSRGLG00000000294   | acct7    | acyl-CoA thioesterase 7 [Source:ZFIN:Acc:ZDB-GENE-040912-42]                                             | -1.732594801 | -4.052708945 | -0.470202484 | 1.850286547  |
|  | ENSRGLG00000000558   | zmp000a  | -                                                                                                        | -2.267420263 | -3.067427995 | -0.285435209 | 5.015054934  |
|  | ENSRGLG000000013178  | -        | -                                                                                                        | 1.068931922  | -3.755262386 | -0.949452766 | 3.212025888  |
|  | ENSRGLG00000002388   | -        | -                                                                                                        | 0.965405977  | -4.69465389  | -0.873202562 | 4.787343689  |
|  | ENSRGLG000000004876  | nos1     | nitric oxide synthase domain containing 1 [Source:ZFIN:Acc:ZDB-GENE-061013-657]                          | -2.47047724  | -3.470149827 | -2.47047724  | 3.49250276   |
|  | ENSRGLG00000006655   | -        | -                                                                                                        | -2.518102759 | -16.6171021  | -1.585535651 | 17.51397427  |
|  | ENSRGLG000000001681  | psat1    | phosphoserine aminotransferase 1 [Source:ZFIN:Acc:ZDB-GENE-030131-5723]                                  | -0.42180302  | -4.77394986  | -1.297272038 |              |

|  |                     |                 |                                                                                                                                            |              |              |              |              |
|--|---------------------|-----------------|--------------------------------------------------------------------------------------------------------------------------------------------|--------------|--------------|--------------|--------------|
|  | ENSRGLG00000003807  | wap65-like      | Oryzias latipes warm-temperature-acclimation-related-65 kDa protein-like protein (wap65-like), mRNA [Source:RefSeq; mRNA Acc:NM_001104852] | -1.898528422 | -1.991386008 | 6.989099967  | 7.082441543  |
|  | ENSRGLG00000007781  | 43br91          | membrane-associated ring finger (CHC4) 1 [Source:ZFIN; Acc:ZDB-Gene-081112-1]                                                              | 0.829595654  | 0.750319243  | 3.066060424  | 3.145819053  |
|  | ENSRGLG00000002971  | -               | -                                                                                                                                          | 0.513226489  | 0.94926842   | 4.829559346  | 4.394005778  |
|  | ENSRGLG00000005868  | ano9a           | anocamnin 9a [Source:ZFIN; Acc:ZDB-Gene-071004-46]                                                                                         | 11.69874373  | 12.37676301  | 4.805098925  | 4.12754752   |
|  | ENSRGLG00000006992  | ttc21b          | tetratricopeptide repeat domain 21B [Source:ZFIN; Acc:ZDB-Gene-031010-34]                                                                  | -1.691201205 | -0.788444288 | 3.960611225  | 3.058339077  |
|  | ENSRGLG00000004329  | sic211-272n     | protein kinase cAMP-dependent type II regulatory subunit beta [Source:HGNC; Symbol:ACC:HGNC:83392]                                         | 3.430205847  | 2.319587192  | 3.002107207  | 3.11213516   |
|  | ENSRGLG00000002225  | mf212b          | sic211-10b2.1 [Source:ZFIN; Acc:ZDB-Gene-070913-9]                                                                                         | -3.55453559  | -0.614236519 | 6.736306663  | 3.827399557  |
|  | ENSRGLG00000004674  | dync2ii1        | dyenin, cytoplasmic 2, light intermediate chain 1 [Source:ZFIN; Acc:ZDB-Gene-040426-129]                                                   | -0.138596769 | -0.425663618 | 4.67037912   | 4.84457312   |
|  | ENSRGLG00000002440  | npy2i1          | neuropeptide Y receptor Y2, like [Source:ZFIN; Acc:ZDB-Gene-111115-4]                                                                      | 1.284922139  | 1.399631731  | 4.8424896    | 4.736280021  |
|  | ENSRGLG00000000792  | ten1            | TEN1 C57 complex subunit [Source:ZFIN; Acc:ZDB-Gene-030131-8755]                                                                           | 0.025953957  | 0.515874327  | 4.172529167  | 3.683093983  |
|  | ENSRGLG00000009047  | -               | -                                                                                                                                          | -3.700568845 | -0.03853596  | 8.12678022   | 4.464732001  |
|  | ENSRGLG00000009795  | -               | -                                                                                                                                          | 0            | 10.38730653  | 18.42067281  | 8.033785773  |
|  | ENSRGLG00000000448  | -               | -                                                                                                                                          | -0.176824293 | 0.953695665  | 4.33451951   | 3.594484323  |
|  | ENSRGLG000000021693 | -               | -                                                                                                                                          | 1.906640528  | 4.003648961  | 6.55793137   | 4.461407885  |
|  | ENSRGLG000000012963 | -               | -                                                                                                                                          | 2.250530739  | 1.841975347  | 6.36780006   | 4.016718558  |
|  | ENSRGLG000000010576 | cerkl           | ceramide kinase-like [Source:ZFIN; Acc:ZDB-Gene-070410-38]                                                                                 | -0.024988177 | -1.107430563 | 3.258207753  | 4.341139532  |
|  | ENSRGLG00000001896  | katnal2         | katanin p60 subunit A-like 2 [Source:ZFIN; Acc:ZDB-Gene-051113-156]                                                                        | -0.711129247 | 0.0639032    | 4.94803276   | 4.173489926  |
|  | ENSRGLG000000011467 | -               | -                                                                                                                                          | 0.999306812  | -0.438081634 | 4.44252685   | 5.880402296  |
|  | ENSRGLG000000013742 | efhc2           | EF-hand domain (C-terminal) containing 2 [Source:ZFIN; Acc:ZDB-Gene-031001-10]                                                             | 4.82949192   | 0.02025707   | 5.587154246  | 10.39147865  |
|  | ENSRGLG000000012783 | -               | -                                                                                                                                          | 1.407894227  | -1.464525781 | 3.895284964  | 6.768103005  |
|  | ENSRGLG000000012009 | -               | -                                                                                                                                          | -0.92266425  | 2.94634703   | 7.587482923  | 6.02738942   |
|  | ENSRGLG00000005615  | cock181         | coiled-coil domain containing 181 [Source:ZFIN; Acc:ZDB-Gene-060503-312]                                                                   | 2.618839687  | 1.22064028   | 3.865515167  | 5.264236964  |
|  | ENSRGLG000000012090 | -               | -                                                                                                                                          | 0            | 10.65611198  | 15.794607    | 9.53977875   |
|  | ENSRGLG000000016424 | fem167ab        | family with sequence similarity 167 member A [Source:NCBI; gene:Acc:101170398]                                                             | 0.112859029  | -0.712735828 | 3.103275523  | 3.951031735  |
|  | ENSRGLG00000006905  | form1           | formin 1 [Source:HGNC; Symbol:ACC:HGNC:3788]                                                                                               | 0.43927741   | 0.151323871  | 3.407935691  | 3.696374332  |
|  | ENSRGLG000000010421 | -               | -                                                                                                                                          | 0            | 11.75305793  | 16.41598433  | 4.66340222   |
|  | ENSRGLG000000009960 | -               | -                                                                                                                                          | 11.30538919  | 0            | 4.91560692   | 16.22148706  |
|  | ENSRGLG000000007306 | -               | -                                                                                                                                          | -1.334939991 | 0.894595164  | 6.21795665   | 3.98542319   |
|  | ENSRGLG00000006851  | ropr1l          | rhophilin associated tail protein 1-like [Source:ZFIN; Acc:ZDB-Gene-040724-235]                                                            | 4.065172602  | 1.785880802  | 4.777494308  | 5.07268149   |
|  | ENSRGLG00000005163  | lgl1b           | leucine-rich, glioma inactivated 1b [Source:ZFIN; Acc:ZDB-Gene-060217-1]                                                                   | 3.932469742  | 1.536715183  | 3.365360391  | 5.761605293  |
|  | ENSRGLG000000012850 | odf2            | outer dense fiber protein 2 [Source:NCBI; gene:Acc:101172288]                                                                              | 1.48835769   | -0.061003116 | 3.28983415   | 4.839679735  |
|  | ENSRGLG000000010401 | PCGF3           | polycomb group ring finger 3 [Source:NCBI; gene:Acc:101173293]                                                                             | 0.610225913  | 0.29974326   | 3.346539554  | 4.366395954  |
|  | ENSRGLG000000009021 | lrrc18a         | leucine rich repeat containing 18a [Source:ZFIN; Acc:ZDB-Gene-090313-323]                                                                  | 0            | 12.39123553  | 19.14544939  | 6.75468642   |
|  | ENSRGLG00000007321  | ELMOD2          | ELMO domain containing 2 [Source:HGNC; Symbol:ACC:HGNC:28111]                                                                              | 0.622985922  | 1.445724716  | 4.597894724  | 3.77601518   |
|  | ENSRGLG000000008354 | myzap           | myocardial zonula adherens protein [Source:ZFIN; Acc:ZDB-Gene-041111-91]                                                                   | -0.504952683 | -0.31460266  | 3.655709894  | 3.655709894  |
|  | ENSRGLG000000016142 | ankle1a         | ankyrin repeat and EF-hand domain containing 1a [Source:ZFIN; Acc:ZDB-Gene-041001-196]                                                     | 2.964870961  | 0.110836092  | 3.155961116  | 6.010481216  |
|  | ENSRGLG00000006026  | zfp110366       | zinc finger protein 110366 [Source:ZFIN; Acc:ZDB-Gene-050417-302]                                                                          | 0.789167075  | 1.832760627  | 4.53857215   | 3.495467217  |
|  | ENSRGLG00000001899  | coo40           | coiled-coil domain containing 40 [Source:ZFIN; Acc:ZDB-Gene-060503-723]                                                                    | -0.603262786 | -1.683994214 | 3.983397427  | 5.064613922  |
|  | ENSRGLG00000009699  | KIAA1549l       | KIAA1549 like [Source:HGNC; Symbol:ACC:HGNC:24838]                                                                                         | -0.164699857 | -0.86880876  | 3.79327998   | 4.515868251  |
|  | ENSRGLG000000017613 | -               | -                                                                                                                                          | 0            | 11.37427334  | 17.84422125  | 6.470422944  |
|  | ENSRGLG000000007096 | rfxank          | regulatory factor X-associated ankyrin-containing protein [Source:ZFIN; Acc:ZDB-Gene-050208-596]                                           | -0.019193591 | 0.080758376  | 3.108415572  | 3.008948223  |
|  | ENSRGLG000000010634 | -               | -                                                                                                                                          | 1.206772076  | -0.898087263 | 3.81727248   | 5.922616732  |
|  | ENSRGLG00000006572  | IFT43           | intraflagellar transport 43 [Source:HGNC; Symbol:ACC:HGNC:29669]                                                                           | -0.693143175 | 0.430829467  | 5.237221529  | 4.113733887  |
|  | ENSRGLG00000007358  | bnip1a          | BCL2 interacting protein 1a [Source:ZFIN; Acc:ZDB-Gene-081107-44]                                                                          | -3.201888369 | 1.615830913  | 7.83542029   | 3.018200484  |
|  | ENSRGLG000000006167 | -               | -                                                                                                                                          | 1.039938998  | 0.45209965   | 6.151972974  | 6.740309994  |
|  | ENSRGLG000000011661 | hfs2            | intraflagellar transport 52 [Source:NCBI; gene:Acc:101183244]                                                                              | 2.506574804  | 0.300283689  | 3.38788578   | 5.594661759  |
|  | ENSRGLG00000007095  | -               | -                                                                                                                                          | 2.251809441  | 0.011956582  | 4.391573297  | 5.901002299  |
|  | ENSRGLG00000005291  | nmf5            | NME/NUM2 family member 5 [Source:NCBI; gene:Acc:101162299]                                                                                 | -1.608791133 | 0.09667457   | 6.438607952  | 4.733644128  |
|  | ENSRGLG000000017228 | si.zfos-223e1.2 | si.zfos-223e1.2 [Source:ZFIN; Acc:ZDB-Gene-110411-269]                                                                                     | 1.069650024  | -0.101179444 | 6.321358948  | 7.492675211  |
|  | ENSRGLG000000010110 | -               | -                                                                                                                                          | 11.2942359   | 9.14418193   | 9.8473676308 | 9.8473676308 |
|  | ENSRGLG00000003197  | claf52          | clia and flagella associated protein 52 [Source:ZFIN; Acc:ZDB-Gene-050202-296]                                                             | 2.616698047  | 1.732002081  | 5.199965894  | 6.085147921  |
|  | ENSRGLG000000007010 | yfpn3           | YfpN-terminal domain containing 3 [Source:ZFIN; Acc:ZDB-Gene-050208-755]                                                                   | 13.64087417  | 13.1436128   | 3.746220417  | 4.243950103  |
|  | ENSRGLG000000006353 | fadk2 (l of ma  | fatty acid desaturase 2 [Source:NCBI; gene:Acc:101156321]                                                                                  | 11.98309949  | 0            | 5.483546137  | 17.4678452   |
|  | ENSRGLG000000010882 | -               | -                                                                                                                                          | 1.481133038  | 1.149487496  | 3.269073221  | 3.601203769  |
|  | ENSRGLG000000016096 | -               | -                                                                                                                                          | 0            | 15.77484457  | 15.77484427  | 15.77484427  |
|  | ENSRGLG000000014069 | serpincl1       | serpin family C member 1 [Source:NCBI; gene:Acc:101155275]                                                                                 | 0.979473954  | -0.68152649  | 5.990490876  | 7.651901859  |
|  | ENSRGLG00000005926  | wdr66           | WD repeat domain 66 [Source:ZFIN; Acc:ZDB-Gene-060526-328]                                                                                 | 2.28270465   | -0.890442992 | 8.23068402   | 11.40435047  |
|  | ENSRGLG000000021663 | -               | -                                                                                                                                          | 2.74579839   | 2.165744769  | 7.231574513  | 7.182108215  |
|  | ENSRGLG00000003102  | PK3R6           | phosphoinositide-3-kinase regulatory subunit 6 [Source:HGNC; Symbol:ACC:HGNC:27101]                                                        | -0.084632422 | -0.752659393 | 3.470701743  | 4.13912328   |
|  | ENSRGLG00000005126  | -               | -                                                                                                                                          | 3.95644531   | 1.165535719  | 4.366677445  | 7.150267422  |
|  | ENSRGLG000000011990 | -               | -                                                                                                                                          | 13.67309813  | 11.63218641  | 6.44017005   | 8.48151446   |

|  |                     |          |                                                                                                                 |             |              |              |              |
|--|---------------------|----------|-----------------------------------------------------------------------------------------------------------------|-------------|--------------|--------------|--------------|
|  | ENSRGLG00000002084  | prss35   | protease, serine, 35 [Source:ZFIN; Acc:ZDB-Gene-040704-55]                                                      | 4.465405264 | 0.59120549   | -3.250757889 | 0.623927177  |
|  | ENSRGLG000000013980 | gata-1   | Oryzias latipes hematopoietic transcription factor GATA-1 (gata-1), mRNA [Source:RefSeq; mRNA Acc:NM_001104862] | 6.60908277  | 1.302513202  | 4.30097474   | 1.006098862  |
|  | ENSRGLG000000016335 | gdkwr-19 | gdkwr-19-like-194e4.1 [Source:ZFIN; Acc:ZDB-Gene-100922-Gene-041010-121]                                        | 6.087917465 | -0.72014281  | -9.990531405 | 2.818212724  |
|  | ENSRGLG000000018482 | fh2b     | four and a half LIM domains 2b [Source:ZFIN; Acc:ZDB-Gene-041010-121]                                           | 4.040670879 | -0.689022887 | -3.951841921 | 0.778350052  |
|  | ENSRGLG000000016164 | -        | -                                                                                                               | 4.533368544 | -13.64884177 | -4.651719264 | 13.53100124  |
|  | ENSRGLG00000000936  | -        | -                                                                                                               | 4.89962032  | -2.99257098  | -3.13001121  | 4.16266366   |
|  | ENSRGLG000000017031 | hoxb13a  | homeobox B13a [Source:ZFIN; Acc:ZDB-Gene-050812-11]                                                             | 6.145051628 | -0.069145045 | -3.19712769  | 3.017508598  |
|  | ENSRGLG000000021111 | -        | -                                                                                                               | 4.103100836 | -11.72168499 | -3.21497014  | 12.61280631  |
|  | ENSRGLG00000002123  | boka     | BOCK, BCL2 family apoptosis regulator A [Source:ZFIN; Acc:ZDB-Gene-040801-131]                                  | 2.726668805 | -0.75725236  | -3.83064886  | 0.346142638  |
|  | ENSRGLG000000015646 | -        | -                                                                                                               | 4.51575064  | 0.956031094  | -3.058117047 | 4.92087143   |
|  | ENSRGLG000000014950 | ofmlb3   | olfactomedin-like 3b [Source:ZFIN; Acc:ZDB-Gene-050302-161]                                                     | 3.892381887 | 2.508148212  | -7.770044011 | 2.389305131  |
|  | ENSRGLG000000017149 | igfbp3   | insulin like growth factor binding protein 3 [Source:HGNC; Symbol:ACC:HGNC:5477]                                | 3.853169143 | 1.51851508   | -5.601418567 | 1.227709862  |
|  | ENSRGLG000000017127 | nfxa1    | NADPH oxidase activator 1 [Source:ZFIN; Acc:ZDB-Gene-050913-39]                                                 | 1.931882641 | 1.771033611  | -3.310705235 | -3.149373041 |
|  | ENSRGLG000000005424 | cdh16    | cadherin 16, KSP-cadherin [Source:ZFIN; Acc:ZDB-Gene-140106-140]                                                | 4.914190717 | 0.96389713   | -6.602845505 | 0.342432165  |
|  | ENSRGLG00000001358  | -        | -                                                                                                               | 5.005252235 | -2.632972238 | -6.283795586 | 1.350690311  |
|  | ENSRGLG000000012084 | ftv83    | fntRIM family, member 83 [Source:ZFIN; Acc:ZDB-Gene-031002-111]                                                 | 3.461453107 | -0.435713717 | -3.052628224 | 0.845022713  |
|  | ENSRGLG000000017214 | -        | -                                                                                                               | 6.441977174 | 1.869637057  | -3.139648676 | 1.433174934  |
|  | ENSRGLG000000012589 | foxc1    | Oryzias latipes forkhead box C1 (foxc1), mRNA [Source:NCBI; gene:Acc:101169451]                                 | 5.695111848 | -0.314818687 | -5.601418567 | 0.409896984  |
|  | ENSRGLG00000002297  | snoq1l   | snoRNA1 [Source:NCBI; gene:Acc:101170144]                                                                       | 17.41584374 | 3.414551359  | -3.738707010 | 6.484820197  |
|  | ENSRGLG00000000239  | slc43a2b | asciic like metallo-protease [Source:NCBI; gene:Acc:00049316]                                                   | 6.864075363 | 2.22759485   | -4.44278456  | -0.8076773   |
|  | ENSRGLG000000005019 | slc34a2b | large neutral amino acid transporter small subunit 4 [Source:NCBI; gene:Acc:101173728]                          | 5.444736743 | 1.324467199  | -3.324295467 | 0.796458917  |
|  | ENSRGLG00000001955  | -        | -                                                                                                               | 3.770305076 | 1.543532208  | -3.358383278 | 1.128398063  |
|  | ENSRGLG00000007217  | MEP1B    | meprin A subunit beta [Source:HGNC; Symbol:ACC:HGNC:7020]                                                       | 6.730845105 | -11.31815299 | -6.509303014 | 11.45647763  |
|  | ENSRGLG000000012539 | klf17    | Kruppel-like factor 17 [Source:ZFIN; Acc:ZDB-Gene-010129-1]                                                     | 5.744249129 | 0.135524002  | -3.207883092 | 2.401326885  |
|  | ENSRGLG000000002682 | slc12a1  | solute carrier family 12 (sodium/potassium/chloride transporter), member 1 [Source:ZFIN; Acc:ZDB-Gene-080130-3] | 4.923709544 | -7.438820311 | -4.426561328 | 7.936477616  |
|  | ENSRGLG000000010977 | ENPP7    | ectonucleotide pyrophosphatase/phosphodiesterase family member 7 [Source:NCBI; gene:Acc:101173468]              | 7.639288325 | -1.329668306 | -4.847301523 | 4.176136229  |
|  | ENSRGLG000000040055 | -        | -                                                                                                               | 5.920158156 | 1.429022124  | -3.953125206 | -0.015404297 |
|  | ENSRGLG000000003113 | lygi2    | lysozyme g-like 2 [Source:ZFIN; Acc:ZDB-Gene-090917-1161]                                                       | 5.685368891 | 1.487572301  | -3.276946994 | 0.921344511  |
|  | ENSRGLG00000010881  | acta1    | Oryzias latipes actin, alpha 1, skeletal muscle (acta1), mRNA [Source:RefSeq; mRNA Acc:NM_00104806]             | 5.927846049 | -0.472017525 | -6.68783216  | -0.28748387  |
|  | ENSRGLG000000014020 | -        | -                                                                                                               | 17.89539351 | 10.50765334  | -3.864985176 | 3.968719399  |
|  | ENSRGLG000000017407 | foxa2    | Oryzias latipes                                                                                                 |             |              |              |              |

|            |                    |                    |                                                                                                       |                                                                                    |              |              |              |             |
|------------|--------------------|--------------------|-------------------------------------------------------------------------------------------------------|------------------------------------------------------------------------------------|--------------|--------------|--------------|-------------|
|            | ENSRORG0000012626  | mapk15             | mitogen-activated protein kinase 15<br>[Source:ZFIN,Acc:ZDB-GENE-059522-307]                          | 3.343802499                                                                        | 0.200877663  | 4.894480177  | 8.027888269  |             |
|            | ENSRORG0000015805  | LRR3               | leucine rich repeat containing 9 [Source:HGNC Symbol,Acc:HGNC:19848]                                  | 11.5322098                                                                         | 10.75939722  | 5.155751759  | 5.929031261  |             |
|            | ENSRORG0000018250  | -                  | -                                                                                                     | 1.687997562                                                                        | -1.571293099 | 3.10707055   | 3.66684472   |             |
|            | ENSRORG0000005899  | -                  | -                                                                                                     | 12.51895799                                                                        | 0            | 4.651658694  | 17.17110847  |             |
|            | ENSRORG0000005465  | ndc80              | NDC80 kinetochore complex component<br>[Source:ZFIN,Acc:ZDB-GENE-030131-304]                          | -0.802445205                                                                       | 0.093836737  | 4.152380727  | 3.25683786   |             |
|            | ENSRORG0000009580  | nlgn3b             | Oryzias latipes neuroligin 3b (nlgn3b), mRNA<br>[Source:RefSeq mRNA,Acc:NM_001201508]                 | 5.118025165                                                                        | 2.058656353  | 4.102961064  | 7.162793563  |             |
|            | ENSRORG0000006898  | tmprss12           | transmembrane protease serine 11D [Source:NCBI gene,Acc:101163815]                                    | 3.342084193                                                                        | 2.19451699   | 5.187130254  | 6.335183366  |             |
|            | ENSRORG0000012659  | -                  | -                                                                                                     | 12.01659591                                                                        | 10.17525013  | 3.82948946   | 5.671302951  |             |
|            | ENSRORG0000001528  | lam161a            | family with sequence similarity 161, member A<br>[Source:ZFIN,Acc:ZDB-GENE-110310-11]                 | -0.186818947                                                                       | -3.216333365 | 4.544198515  | 7.574198429  |             |
|            | ENSRORG00000008394 | -                  | -                                                                                                     | 0.338970307                                                                        | -1.611834244 | 3.664349573  | 5.615639243  |             |
|            | ENSRORG00000014431 | -                  | -                                                                                                     | -11.7910005                                                                        | 2.320575781  | 18.05106234  | 3.939800033  |             |
|            | ENSRORG00000003798 | -                  | -                                                                                                     | -1.109135071                                                                       | 1.496233159  | 6.663310124  | 4.058427995  |             |
|            | ENSRORG00000003542 | -                  | -                                                                                                     | 5.092445731                                                                        | 2.17425737   | 4.519120656  | 7.437709003  |             |
|            | ENSRORG00000002844 | srckey_3016        | synovectomin [Source:NCBI gene,Acc:101165138]                                                         | 2.000775043                                                                        | 0.465279566  | 4.113886713  | 5.64866814   |             |
|            | ENSRORG00000012645 | -                  | -                                                                                                     | 14.48112143                                                                        | 0            | 3.60431571   | 13.08592890  |             |
|            | ENSRORG0000015836  | gabrb3             | gamma-aminobutyric acid (GABA) A receptor, beta 3<br>[Source:ZFIN,Acc:ZDB-GENE-101102-2]              | 0.199941292                                                                        | -0.814484341 | 5.526551132  | 5.641463725  |             |
|            | ENSRORG0000016648  | VASH1              | vasohistin 1 [Source:HGNC Symbol,Acc:HGNC:19964]                                                      | 2.752077936                                                                        | 0.478200109  | 3.577787208  | 5.854150839  |             |
|            | ENSRORG00000001515 | -                  | -                                                                                                     | 0                                                                                  | 11.2399663   | 16.69749758  | 5.457984163  |             |
|            | ENSRORG00000021025 | RF00004            | U2 spliceosomal RNA [Source:NCBI gene,Acc:111948330]                                                  | -0.997361427                                                                       | 0.503152328  | 7.337899258  | 5.837616151  |             |
|            | ENSRORG0000018074  | lamma              | lamin A propeptide inhibitory molecule a<br>[Source:ZFIN,Acc:ZDB-GENE-040718-333]                     | 0.079912872                                                                        | -0.238738185 | 3.857741273  | 4.176877041  |             |
|            | ENSRORG00000051579 | -                  | -                                                                                                     | -0.766313446                                                                       | 1.219485196  | 5.006840685  | 3.075323288  |             |
|            | ENSRORG00000010412 | -                  | -                                                                                                     | 0                                                                                  | 11.58795093  | 16.18172084  | 4.594243252  |             |
|            | ENSRORG0000011835  | C13orf42           | uncharacterized LOC105356783 [Source:NCBI gene,Acc:105356783]                                         | 12.2499845                                                                         | 0            | 4.902681295  | 17.15315655  |             |
|            | ENSRORG0000001237  | -                  | -                                                                                                     | 14.68263639                                                                        | 10.22633994  | 4.63383892   | 9.99603069   |             |
|            | ENSRORG0000021684  | -                  | -                                                                                                     | 1.30876893                                                                         | 2.322030769  | 5.58865641   | 4.575862758  |             |
|            | ENSRORG0000012964  | -                  | -                                                                                                     | 0.271589972                                                                        | -0.798228142 | 4.349849397  | 5.420250545  |             |
|            | ENSRORG0000011543  | spata17            | spermatogenesis associated 17 [Source:ZFIN,Acc:ZDB-GENE-11124-1]                                      | 0.137146346                                                                        | -13.336653   | 5.496524839  | 18.97803262  |             |
|            | ENSRORG0000021620  | -                  | -                                                                                                     | 1.882847172                                                                        | -0.202426483 | 3.147717265  | 5.23536166   |             |
|            | ENSRORG0000017759  | ghhra              | growth hormone releasing hormone receptor a<br>[Source:ZFIN,Acc:ZDB-GENE-050315-2]                    | 0.795021855                                                                        | -0.001457198 | 4.085005057  | 4.881868947  |             |
|            | ENSRORG00000004847 | adal               | adenosine deaminase-like [Source:ZFIN,Acc:ZDB-GENE-050913-145]                                        | -0.20921279                                                                        | 0.372659638  | 3.672996565  | 3.091609054  |             |
|            | ENSRORG00000000176 | -                  | -                                                                                                     | 1.390940685                                                                        | 0.518509421  | 6.044829284  | 6.917743394  |             |
|            | ENSRORG0000010304  | efcab7             | EF-hand calcium binding domain 7 [Source:NCBI gene,Acc:101154938]                                     | -0.084926385                                                                       | -0.08483363  | 7.35003478   | 3.75339635   |             |
|            | ENSRORG00000010901 | nicn1              | nicotinic [Source:NCBI gene,Acc:101161020]                                                            | 1.536772833                                                                        | -0.494034617 | 3.705100756  | 5.79339946   |             |
|            | ENSRORG0000005866  | uk4                | unc-51 like kinase 4 [Source:ZFIN,Acc:ZDB-GENE-100922-243]                                            | 13.18645475                                                                        | 10.92436716  | 5.831252611  | 8.093801079  |             |
|            | ENSRORG0000010104  | wdr54              | WD repeat domain 54 [Source:NCBI gene,Acc:101162217]                                                  | 1.545116508                                                                        | 0.201060986  | 4.325708887  | 5.67024884   |             |
|            | ENSRORG00000036005 | NT5C3B (1 of 5)    | 5-nucleotidase, cytosolic IIIb [Source:HGNC Symbol,Acc:HGNC:28300]                                    | -0.722723521                                                                       | -0.309244835 | 3.80627133   | 3.39277618   |             |
|            | ENSRORG00000070505 | pyt11ba            | phosphate cytidylyltransferase 1, choline, beta<br>[Source:NCBI gene,Acc:101166014]                   | 1.921598149                                                                        | -10.95880088 | 3.299611625  | 16.17972408  |             |
|            | ENSRORG0000008566  | TDX9               | transcript expressed 9 [Source:HGNC Symbol,Acc:HGNC:29585]                                            | 0.380564865                                                                        | -0.069127268 | 9.503300826  | 9.953482739  |             |
|            | ENSRORG0000006342  | -                  | -                                                                                                     | 2.251390936                                                                        | -0.430164844 | 3.934154685  | 6.616711086  |             |
|            | ENSRORG00000090925 | konip3b            | Kv channel interacting protein 3b, calseinin<br>[Source:ZFIN,Acc:ZDB-GENE-040426-1752]                | 0                                                                                  | 13.33483472  | 16.34771513  | 10.31352021  |             |
|            | ENSRORG0000010958  | -                  | -                                                                                                     | -12.35683708                                                                       | -0.733688969 | 15.90788008  | 4.284918043  |             |
|            | ENSRORG0000005158  | -                  | -                                                                                                     | 2.626685947                                                                        | 0.954122219  | 3.819075225  | 5.492123181  |             |
|            | ENSRORG0000010598  | -                  | -                                                                                                     | 15.2498949                                                                         | 12.15918703  | 3.64304516   | 6.734223201  |             |
|            | ENSRORG0000007694  | -                  | -                                                                                                     | 0                                                                                  | 11.54400328  | 15.62719301  | 4.083662322  |             |
| WTT vs WTD | 1945               | ENSRORG00000002393 | aplp2                                                                                                 | amyloid beta (A4) precursor-like protein 2<br>[Source:ZFIN,Acc:ZDB-GENE-061039-28] | 3.318780979  | 0.342371246  | -2.441628181 | 0.535268342 |
|            | ENSRORG0000012907  | dsr1               | discoidin domain receptor tyrosine kinase 1<br>[Source:ZFIN,Acc:ZDB-GENE-060323-2]                    | 4.52709617                                                                         | 2.282370136  | -0.436485258 | 1.808720174  |             |
|            | ENSRORG0000003427  | dyf1               | dyfelin, limb girdle muscular dystrophy 2B (autosomal recessive) [Source:ZFIN,Acc:ZDB-GENE-070501-1]  | 3.973765331                                                                        | 1.433126937  | 1.433126937  | 1.478001881  |             |
|            | ENSRORG0000010507  | myoz1b             | myozenin 1b [Source:ZFIN,Acc:ZDB-GENE-040718-146]                                                     | 6.054058378                                                                        | 0.956559368  | -1.174089301 | 3.923969921  |             |
|            | ENSRORG0000011813  | tc7f11             | Oryzias latipes transcription factor 7 like 1 (tc7f11), mRNA<br>[Source:RefSeq mRNA,Acc:NM_001252248] | 3.818289685                                                                        | 1.504308326  | -0.837752186 | 1.475154401  |             |
|            | ENSRORG0000002997  | fbpa1a (1 of 4)    | fructose-1,6-bisphosphatase 1 [Source:NCBI gene,Acc:101156992]                                        | 6.014616333                                                                        | 0.098184466  | -4.290681973 | 1.626233741  |             |
|            | ENSRORG0000015869  | -                  | -                                                                                                     | 3.741877638                                                                        | 0.704733061  | -2.206320929 | 0.831302929  |             |
|            | ENSRORG00000000338 | pcrbp              | prolactin receptor b [Source:ZFIN,Acc:ZDB-GENE-070705-155]                                            | 3.180821458                                                                        | 0.266799915  | -9.293807196 | 0.510930604  |             |
|            | ENSRORG0000006776  | srckey_243k1       | endonuclease domain-containing 1 protein<br>[Source:NCBI gene,Acc:101169485]                          | 5.76360777                                                                         | 0.108113808  | -5.146194058 | -0.009784825 |             |
|            | ENSRORG00000004097 | ROBO2              | roundabout guidance receptor 2 [Source:HGNC Symbol,Acc:HGNC:10250]                                    | 3.592276173                                                                        | 1.631865765  | -0.474008906 | 1.487068639  |             |
|            | ENSRORG0000017694  | map3k5             | mitogen-activated protein kinase kinase 5<br>[Source:ZFIN,Acc:ZDB-GENE-030827-3]                      | 3.180160968                                                                        | 0.318152516  | -2.44476452  | 0.41772881   |             |
|            | ENSRORG0000014328  | -                  | -                                                                                                     | 4.641407538                                                                        | 2.648002418  | -2.477954098 | -0.484064325 |             |
|            | ENSRORG0000013959  | -                  | -                                                                                                     | 7.003727024                                                                        | -3.958060431 | 2.298027252  | 0.095007252  |             |
|            | ENSRORG0000017374  | gata4              | GATA binding protein 4 [Source:ZFIN,Acc:ZDB-GENE-980526-476]                                          | 3.904115067                                                                        | 2.744287533  | -0.360730135 | 0.799581474  |             |
|            | ENSRORG00000021472 | RF00090            | small nuclear RNA SNORA74 [Source:NCBI gene,Acc:111948088]                                            | 3.996880456                                                                        | 0.772366631  | -1.2339749   | 1.99123855   |             |
|            | ENSRORG0000002321  | fd6b               | frizzled class receptor 6 [Source:ZFIN,Acc:ZDB-GENE-040426-1451]                                      | 3.172177999                                                                        | 1.170710854  | 0.12948439   | 1.550134848  |             |
|            | ENSRORG0000003028  | -                  | -                                                                                                     | 4.470196055                                                                        | 1.890296903  | -0.864309333 | 1.716074917  |             |
|            | ENSRORG00000004949 | thbs4b             | thrombospondin 4b [Source:ZFIN,Acc:ZDB-GENE-020708-4]                                                 | 4.547412772                                                                        | -0.654813907 | -3.710113861 | 1.492597664  |             |

|  |                    |                |                                                                                                        |             |              |              |              |
|--|--------------------|----------------|--------------------------------------------------------------------------------------------------------|-------------|--------------|--------------|--------------|
|  | ENSRORG00000002431 | -              | -                                                                                                      | -           | -            | -            | -            |
|  | ENSRORG0000017608  | cx32.3         | connexin 32.3 [Source:ZFIN,Acc:ZDB-GENE-030131-1337]                                                   | 7.237313134 | 2.814664365  | -3.026516259 | 1.386624743  |
|  | ENSRORG00000003862 | fn1b           | fibronectin 1b [Source:ZFIN,Acc:ZDB-GENE-030131-655]                                                   | 6.48928282  | 0.411086148  | -5.389384259 | 0.682297762  |
|  | ENSRORG00000000857 | airp71-68      | airp71-68n219 [Source:ZFIN,Acc:ZDB-GENE-081105-691]                                                    | 4.065328579 | 0.413072311  | -3.893585318 | 0.559213809  |
|  | ENSRORG00000002426 | zpc:1159z      | zpc:1159z [Source:ZFIN,Acc:ZDB-GENE-090220-231]                                                        | 4.100083285 | 0.286149234  | -8.834292336 | -0.555187973 |
|  | ENSRORG00000000501 | -              | -                                                                                                      | 7.708008501 | 2.389089241  | -6.959898966 | -2.739417255 |
|  | ENSRORG0000016428  | -              | -                                                                                                      | 5.903923266 | 0.508623717  | -6.08682356  | -0.610799074 |
|  | ENSRORG00000009643 | MAF            | MAF E2F transcription factor [Source:HGNC Symbol,Acc:HGNC:6776]                                        | 6.183049761 | 1.57612217   | -4.810948029 | -0.203536051 |
|  | ENSRORG00000007902 | hmc12a         | homeobox protein Hox-C12a [Source:NCBI gene,Acc:101173058]                                             | 5.840618686 | -0.473806594 | -3.313495165 | 3.001292745  |
|  | ENSRORG00000003247 | foxd1          | Oryzias latipes foxd1b box D1 (foxd1), mRNA<br>[Source:RefSeq mRNA,Acc:NM_001160452]                   | 3.866480597 | 0.075003798  | -4.468793712 | -0.676830569 |
|  | ENSRORG00000016373 | twist3         | twist3 [Source:ZFIN,Acc:ZDB-GENE-061013-388]                                                           | 5.648500059 | -2.4557753   | -4.61393852  | 3.490829865  |
|  | ENSRORG00000002015 | deop1          | deop1 [Source:ZFIN,Acc:ZDB-GENE-061013-388]                                                            | 6.278980683 | -2.246704827 | -6.07593953  | 3.888719046  |
|  | ENSRORG00000000213 | cldn1          | claudin 1 [Source:ZFIN,Acc:ZDB-GENE-010328-9]                                                          | 7.015869857 | 1.73556816   | -5.86301023  | -0.582199188 |
|  | ENSRORG00000002396 | FBLN1 (1 of 1) | fibulin 1 [Source:HGNC Symbol,Acc:HGNC:3600]                                                           | 3.973990209 | 0.532417758  | -4.006286771 | -0.564106897 |
|  | ENSRORG0000013582  | trvisn.2       | trvisn.2 [Source:NCBI gene,Acc:101161921]                                                              | 7.498538101 | 1.546689853  | -6.370625912 | -0.418501767 |
|  | ENSRORG0000016784  | RG36           | regulator of G protein signaling 6 [Source:HGNC Symbol,Acc:HGNC:19002]                                 | 2.234070787 | -0.636667212 | -3.78465236  | -0.913429239 |
|  | ENSRORG00000000487 | ep8f3a         | EP8f3a like 3a [Source:ZFIN,Acc:ZDB-GENE-091204-460]                                                   | 4.300571721 | -1.093588391 | -3.29049925  | 2.104145709  |
|  | ENSRORG00000000858 | pitx1          | paired-like homeobox domain 1 [Source:ZFIN,Acc:ZDB-GENE-060421-3623]                                   | 5.305718698 | 0.429706529  | -3.159373984 | 1.717124567  |
|  | ENSRORG00000002303 | -              | -                                                                                                      | 6.305718698 | 0.429706529  | -3.159373984 | 1.717124567  |
|  | ENSRORG0000017946  | apoda2         | apoda2 [Source:NCBI gene,Acc:101167573]                                                                | 16.6994368  | 10.96206886  | -3.872655377 | 1.98515079   |
|  | ENSRORG0000010290  | poicea         | procollagen C-endopeptidase enhancer a<br>[Source:ZFIN,Acc:ZDB-GENE-041014-370]                        | 8.428454749 | 3.278859     | -20.60613079 | -15.45624896 |
|  | ENSRORG0000011244  | ank1b          | ankyrin 1, erythrocytic b [Source:ZFIN,Acc:ZDB-GENE-091113-6]                                          | 6.404069371 | 1.623797028  | -4.148510213 | -1.167752824 |
|  | ENSRORG0000010562  | -              | -                                                                                                      | 5.531184224 | -7.573896238 | -8.015517382 | 4.000068833  |
|  | ENSRORG0000018030  | -              | -                                                                                                      | 3.984543836 | 0.323846136  | -3.839368617 | -0.177286724 |
|  | ENSRORG0000004987  | HMOX2 (1 of 1) | hemoxylin A2 [Source:HGNC Symbol,Acc:HGNC:5103]                                                        | 5.113148006 | 2.548746231  | -3.48671471  | -0.83052005  |
|  | ENSRORG0000001080  | kdh            | vanthine dehydrogenase [Source:ZFIN,Acc:ZDB-GENE-070719-9]                                             | 5.830762083 | 1.75015232   | -3.137763498 | 0.935321201  |
|  | ENSRORG0000014439  | CEL            | bile salt-activated lipase [Source:NCBI gene,Acc:101172470]                                            | 5.58024666  | -1.389756817 | -3.42916416  | 3.42916416   |
|  | ENSRORG00000015628 | -              | -                                                                                                      | 6.104418832 | 1.656494649  | -4.898853562 | -0.450985808 |
|  | ENSRORG00000003253 | patm           | glycine amidinotransferase (L-arginine glycine amidinotransferase) [Source:ZFIN,Acc:ZDB-GENE-021015-1] | 1.280211389 | -0.276017278 | -3.87609299  | -2.142300288 |
|  | ENSRORG0000001079  | -              | -                                                                                                      | 6.738761245 | 2.773884501  | -4.275487892 | -0.310386403 |
|  | ENSRORG0000001820  | rasf3          | RAS protein activator like 3 [Source:ZFIN,Acc:ZDB-GENE-101130-3]                                       | 7.01531894  | 2.36316857   | -3.115769893 | 1.536875628  |
|  | ENSRORG0000001400  | -              | -                                                                                                      | 4.206408    |              |              |              |

|                     |                  |                                                                                                                 |             |              |              |              |
|---------------------|------------------|-----------------------------------------------------------------------------------------------------------------|-------------|--------------|--------------|--------------|
| ENSRORL00000015095  | prpf39           | PRPF39 pre-mRNA processing factor 39 homolog (yeast) [Source:ZFIN,Acc:ZDB-GENE-030616-420]                      | 3.680010812 | 1.380407899  | -0.448131495 | 1.851956198  |
| ENSRORL00000017918  | ackr4a           | physical chemoattractant receptor 4a [Source:ZFIN,Acc:ZDB-GENE-073031-6]                                        | 3.406551601 | 2.250724654  | -1.387254212 | -0.230942429 |
| ENSRORL00000012666  | hpcal1           | hippocalin-like protein 1 [Source:NCBI gene,Acc:101117195]                                                      | 4.268542979 | 2.308399373  | 0.4734192    | 2.434048622  |
| ENSRORL00000013166  | fgl2a            | fibrinogen-like 2a [Source:ZFIN,Acc:ZDB-GENE-030131-9560]                                                       | 4.062427488 | 1.763563423  | -2.283990549 | 0.01535771   |
| ENSRORL00000003107  | foxo1            | Oryzias latipes forkhead box O1 (foxo1), mRNA [Source:RefSeq, mRNA,Acc:NM_01160464]                             | 3.084425391 | 0.309850632  | -0.292273372 | 0.682785875  |
| ENSRORL00000001436  | cdth10a          | protodherin 10a [Source:ZFIN,Acc:ZDB-GENE-020731-1]                                                             | 3.895698429 | 0.58829073   | -1.723411701 | 1.584143905  |
| ENSRORL00000007245  | mvx1             | murine retrovirus integration site 1 homolog [Source:ZFIN,Acc:ZDB-GENE-120221-4]                                | 3.400419307 | 1.169915452  | 0.446684778  | 2.677853388  |
| ENSRORL000000010593 | zan1             | zonadhesin, like [Source:ZFIN,Acc:ZDB-GENE-060131-2]                                                            | 5.732969331 | -1.58705448  | -4.623218465 | 2.69731147   |
| ENSRORL000000021760 | -                | -                                                                                                               | 4.334080371 | 1.057189155  | -0.953579993 | 2.323796203  |
| ENSRORL000000015797 | srgap2           | SLIT-ROBO Rho GTPase activating protein 2 [Source:ZFIN,Acc:ZDB-GENE-060915-9]                                   | 3.041644811 | 1.29789519   | -1.13073343  | 0.631161196  |
| ENSRORL000000016997 | ipl              | lipoprotein lipase [Source:ZFIN,Acc:ZDB-GENE-990415-138]                                                        | 3.205364917 | 0.732280669  | -1.142948885 | 1.330622172  |
| ENSRORL000000014825 | -                | -                                                                                                               | 6.108155378 | 2.433089903  | -0.702627192 | 2.915278786  |
| ENSRORL000000005129 | pftr2            | glutamine-fructose-6-phosphate transaminase 2 [Source:ZFIN,Acc:ZDB-GENE-071113-11]                              | 5.066022869 | -0.239634028 | -4.0819431   | 1.224237919  |
| ENSRORL00000008092  | znc175248        | zinc finger 175248 [Source:ZFIN,Acc:ZDB-GENE-080204-93]                                                         | 3.449742108 | -1.380591884 | -0.891175265 | 3.938642917  |
| ENSRORL00000001336  | -                | -                                                                                                               | 6.789547216 | 3.09174718   | -6.107651016 | -0.48611011  |
| ENSRORL000000015566 | -                | -                                                                                                               | 3.232061468 | 1.147132545  | -0.83845993  | 0.965740054  |
| ENSRORL000000016706 | lam120c          | family with sequence similarity 120C [Source:ZFIN,Acc:ZDB-GENE-080313-228]                                      | 3.478525903 | 0.68711009   | -1.531675403 | 1.026829024  |
| ENSRORL00000008293  | crsp1a           | cysteine and glycine-rich protein 1a [Source:ZFIN,Acc:ZDB-GENE-030909-4]                                        | 4.153165039 | 2.53471335   | 1.300076372  | 2.920255337  |
| ENSRORL000000012154 | rbm38            | RNA binding motif protein 38 [Source:ZFIN,Acc:ZDB-GENE-030131-5923]                                             | 4.061509811 | 1.80926718   | -3.788687811 | -1.535959873 |
| ENSRORL000000040786 | pdgfrb           | platelet-derived growth factor receptor, beta [Source:ZFIN,Acc:ZDB-GENE-030905-2]                               | 3.102661684 | 2.057953473  | -1.68237215  | -0.637043821 |
| ENSRORL00000003229  | prickle1a        | prickle homolog 1a [Source:ZFIN,Acc:ZDB-GENE-030724-5]                                                          | 3.631051088 | 2.016885028  | -0.899594656 | 0.715059907  |
| ENSRORL000000015184 | dusp5            | dual specificity phosphatase 5 [Source:ZFIN,Acc:ZDB-GENE-010625-1]                                              | 5.425136084 | 2.049056472  | -1.21237937  | 2.164187027  |
| ENSRORL000000004772 | gna14            | guanine nucleotide-binding protein subunit alpha-11 [Source:NCBI gene,Acc:101168134]                            | 3.050439658 | 1.011527068  | 0.362541801  | 2.401939253  |
| ENSRORL00000004564  | hnf1ba           | HNF1B homeobox B [Source:ZFIN,Acc:ZDB-GENE-020104-1]                                                            | 6.613013984 | 0.352690718  | -3.852870183 | 2.407935855  |
| ENSRORL000000012339 | lam84b           | family with sequence similarity 84, member B [Source:ZFIN,Acc:ZDB-GENE-080929-119]                              | 3.48898438  | 0.786395413  | -1.107404085 | 1.596880372  |
| ENSRORL000000011475 | sc29a3           | transcription, member 3 [Source:ZFIN,Acc:ZDB-GENE-081107-46]                                                    | 3.412717657 | 0.69080187   | -0.122735475 | 0.599666545  |
| ENSRORL000000017465 | cx3c.4           | connexin 35.4 [Source:ZFIN,Acc:ZDB-GENE-050417-107]                                                             | 5.172718361 | 0.310958033  | -0.294058033 | 2.768188321  |
| ENSRORL000000016323 | -                | -                                                                                                               | 5.8848829   | 1.602977613  | -2.481501706 | 1.800681392  |
| ENSRORL00000004817  | PTPFR            | protein tyrosine phosphatase, receptor type 5 [Source:HGNC Symbol,Acc:HGNC:3661]                                | 3.733122641 | 0.204169294  | -0.855172811 | 0.673728259  |
| ENSRORL00000009594  | ovalb1 (1 of 2)  | ovalbumin 1 [Source:ZFIN,Acc:ZDB-GENE-040625-57]                                                                | 6.567006946 | 1.641268733  | -4.447429873 | 0.478793284  |
| ENSRORL00000000949  | TMEM100          | transmembrane protein 100 [Source:NCBI gene,Acc:101174190]                                                      | 4.759468997 | 0.622772153  | -3.014621936 | 1.122651934  |
| ENSRORL000000008991 | EPHA4            | EPH receptor A4 [Source:HGNC Symbol,Acc:HGNC:3388]                                                              | 3.909653984 | 1.854799294  | -1.172746344 | 3.320894062  |
| ENSRORL000000016108 | tuba8f3          | tubulin alpha-1A chain-like [Source:NCBI gene,Acc:101168346]                                                    | 3.234411958 | 2.333917959  | 0.347629593  | 1.24860952   |
| ENSRORL00000001797  | tnrc2            | tropomyosin C, skeletal muscle [Source:ZFIN,Acc:ZDB-GENE-101171829]                                             | 4.066024637 | -0.153793838 | -3.965722921 | 0.254802825  |
| ENSRORL00000003311  | -                | -                                                                                                               | 4.311529836 | -0.166456988 | -1.907560434 | 2.570905434  |
| ENSRORL000000014507 | wrl13ba          | Wntless family member 13Ba [Source:ZFIN,Acc:ZDB-GENE-070521-1]                                                  | 4.340947751 | 1.903995295  | -0.644082141 | 1.79335438   |
| ENSRORL000000008367 | prom2            | prominin 2 [Source:ZFIN,Acc:ZDB-GENE-080723-16]                                                                 | 3.509035725 | 2.650896475  | -0.477796385 | -            |
| ENSRORL00000004396  | hsp1             | HMG-box transcription factor 1 [Source:ZFIN,Acc:ZDB-GENE-050522-414]                                            | 4.000994126 | 1.804249184  | 0.13842785   | 2.335657431  |
| ENSRORL000000012739 | dec1a            | Oryzias latipes DLH1 protein DEC1a (dec1a), mRNA [Source:RefSeq, mRNA,Acc:NM_001104731]                         | 3.070121004 | 1.25596741   | -1.66507323  | 0.149560953  |
| ENSRORL00000007659  | bat1c1a          | BAH domain and coiled-coil containing 1a [Source:ZFIN,Acc:ZDB-GENE-170301-1]                                    | 3.69989242  | 2.148832769  | -0.614437372 | 0.936304162  |
| ENSRORL000000015690 | -                | -                                                                                                               | 6.87448947  | 2.146669847  | -1.466602877 | 3.199574123  |
| ENSRORL00000002751  | -                | -                                                                                                               | 4.466840812 | 1.514237337  | -3.656678047 | -0.703588856 |
| ENSRORL000000006744 | -                | -                                                                                                               | 4.642196353 | 1.968179414  | -0.2731957   | 2.401310599  |
| ENSRORL000000011773 | NTF5C3B (1 of 5) | 5'-nucleotidase, cytosolic 11B [Source:HGNC Symbol,Acc:HGNC:28300]                                              | 4.545861772 | 2.062058679  | 0.397641193  | 2.881931887  |
| ENSRORL000000011260 | -                | -                                                                                                               | 16.52339365 | 12.01494453  | -4.65379242  | -0.149023062 |
| ENSRORL000000012204 | infrs1a          | tumor necrosis factor receptor superfamily, member 1a [Source:ZFIN,Acc:ZDB-GENE-040626-292]                     | 4.171160794 | 2.739640142  | 0.749237242  | 2.14932378   |
| ENSRORL00000003459  | saem1b           | SAC1 like phosphatidylinositol phosphatase b [Source:ZFIN,Acc:ZDB-GENE-070112-547]                              | 3.290494605 | 1.577483136  | -0.771023999 | 0.942472634  |
| ENSRORL000000009143 | SPOCK2           | SPARC (osteonectin), ovine and kazal like domains proteoglycan 2 [Source:HGNC Symbol,Acc:HGNC:13564]            | 4.886831932 | 0.681794482  | -3.289488626 | 0.916032911  |
| ENSRORL000000015101 | slc13a3          | solute carrier family 13 member 3 [Source:NCBI gene,Acc:101123224]                                              | 5.454241255 | -2.10344218  | -3.120776117 | 4.437278924  |
| ENSRORL000000017938 | apocd1           | apolipoprotein D [Source:NCBI gene,Acc:101167075]                                                               | 5.082405188 | 2.03372608   | -4.616334186 | -1.567529338 |
| ENSRORL000000013603 | tryp             | Oryzias latipes trypsinogen (tryp), mRNA [Source:RefSeq, mRNA,Acc:NM_001104900]                                 | 6.722881284 | 1.892860411  | -6.321638049 | -0.591130368 |
| ENSRORL000000013980 | gata-1           | Oryzias latipes hematopoietic transcription factor GATA-1 (gata-1), mRNA [Source:RefSeq, mRNA,Acc:NM_001104889] | 6.608098277 | 1.30251302   | -4.30097476  | 1.006098682  |
| ENSRORL000000004873 | rasa3            | RAS GTP protein activator 3 [Source:ZFIN,Acc:ZDB-GENE-090313-21]                                                | 3.761048586 | 1.61087599   | -1.048830156 | 1.101826997  |
| ENSRORL000000009847 | smnl1            | smoothened, like [Source:ZFIN,Acc:ZDB-GENE-040212-11]                                                           | 3.188577859 | 2.424526653  | -3.174968847 | -0.610433112 |
| ENSRORL00000002057  | neul1            | neuropilin-1 [Source:ZFIN,Acc:ZDB-GENE-080503-859]                                                              | 3.385000873 | 0.263535423  | -2.58205002  | 0.565749848  |
| ENSRORL000000080406 | efn2             | endothelin 2 [Source:ZFIN,Acc:ZDB-GENE-060503-774]                                                              | 3.690352906 | 2.384006495  | -1.312852917 | -0.062021174 |
| ENSRORL000000007442 | hgd              | homogentate 1,2-dioxygenase [Source:NCBI gene,Acc:101170627]                                                    | 4.048000948 | 0.350752572  | -1.239344313 | 2.458389868  |
| ENSRORL000000016335 | slc14ey-194e6    | slc14ey-194e6.1 [Source:ZFIN,Acc:ZDB-GENE-100922-43]                                                            | 6.08794765  | -0.72014281  | -3.990351405 | 2.818251224  |
| ENSRORL000000011153 | -                | -                                                                                                               | 3.804554596 | 2.00354915   | 1.051118716  | 2.85269374   |
| ENSRORL000000008813 | wnt5a            | wntless-type MMTV integration site family, member 5a [Source:ZFIN,Acc:ZDB-GENE-060329-3]                        | 4.427720753 | 1.084308089  | -1.84720138  | 1.496896355  |
| ENSRORL000000011430 | ptpb1b           | poly(pyrimidine tract binding protein) 1 [Source:NCBI gene,Acc:101165926]                                       | 3.270733471 | 0.678377983  | 0.114302256  | 2.707142679  |

|                     |                 |                                                                                                                  |             |              |              |              |
|---------------------|-----------------|------------------------------------------------------------------------------------------------------------------|-------------|--------------|--------------|--------------|
| ENSRORL00000017041  | HOBX5 (1)       | homeobox B5 [Source:HGNC Symbol,Acc:HGNC:5116]                                                                   | 5.17301842  | 1.58571786   | -4.85580005  | -1.268072783 |
| ENSRORL00000017492  | sp9             | Sp9 transcription factor [Source:NCBI gene,Acc:101162490]                                                        | 5.492717144 | -0.137475663 | -3.0489747   | 2.581702422  |
| ENSRORL00000004788  | ppargc1a        | peroxisome proliferator-activated receptor gamma, coactivator 1 alpha [Source:ZFIN,Acc:ZDB-GENE-080505-1]        | 5.857486152 | -1.218823043 | -3.002275632 | 4.07451885   |
| ENSRORL00000017013  | col1            | collagen type I alpha 1 [Source:NCBI gene,Acc:101144368]                                                         | 5.191811628 | 2.204410913  | -3.977964556 | -0.950079044 |
| ENSRORL000000004326 | tryp1a          | trypsin-related protein 1a [Source:ZFIN,Acc:ZDB-GENE-070718-21]                                                  | 4.948163131 | 0.360301499  | -3.143251459 | 1.445049707  |
| ENSRORL000000005033 | slc34a1a        | solute carrier family 34 (type II sodium/phosphate cotransporter), member 1a [Source:ZFIN,Acc:ZDB-GENE-101006-3] | 6.094690897 | 0.354673694  | -6.932382838 | -1.192757079 |
| ENSRORL000000005297 | pcp1            | Oryzias latipes hemoglobin embryonic unit alpha-like (LOC101155300), mRNA [Source:RefSeq, mRNA,Acc:NM_001278898] | 8.600170769 | 2.956423589  | -3.487102863 | 2.170266804  |
| ENSRORL000000015202 | adams1s         | ADAM metalloproteinase with thrombospondin type 1 motif, 15b [Source:ZFIN,Acc:ZDB-GENE-070814-5]                 | 4.657183288 | 1.342555331  | -3.805973502 | -0.480890161 |
| ENSRORL000000001340 | -               | -                                                                                                                | 4.858232369 | 1.681708476  | -4.778063521 | -1.600963203 |
| ENSRORL000000004586 | ela2i           | chymotrypsin-like elastase family member 2A [Source:NCBI gene,Acc:101188781]                                     | 7.410065549 | 2.399678539  | -5.846825611 | -0.835953071 |
| ENSRORL00000017048  | homb3a          | hombrox B3a [Source:ZFIN,Acc:ZDB-GENE-990415-104]                                                                | 6.115488673 | 0.753845706  | -4.432852147 | 1.923252633  |
| ENSRORL000000005190 | scrlb1          | gelatin [Source:NCBI gene,Acc:101159773]                                                                         | 5.432171473 | 0.918626042  | -3.289359335 | 1.22467665   |
| ENSRORL00000000240  | -               | -                                                                                                                | 7.184859465 | -11.77195159 | -5.398568721 | 13.56145025  |
| ENSRORL00000000217  | -               | -                                                                                                                | 6.611908676 | -0.163535351 | -5.543566187 | 3.276310705  |
| ENSRORL0000001138   | -               | -                                                                                                                | 5.064801545 | -0.675740074 | -0.82865273  | -            |
| ENSRORL00000004222  | fat3            | foliastatin-like 3 (secreted glycoprotein) [Source:ZFIN,Acc:ZDB-GENE-050913-111]                                 | 3.544933568 | -0.597288362 | -4.403607591 | 0.260090531  |
| ENSRORL000000004990 | adams1          | ADAM metalloproteinase with thrombospondin type 1 motif, 1 [Source:ZFIN,Acc:ZDB-GENE-070814-1]                   | 3.587769774 | 1.5020392    | -3.501730711 | -1.244784781 |
| ENSRORL000000013041 | -               | -                                                                                                                | 5.572424885 | 3.03447117   | -4.93587584  | -2.397436318 |
| ENSRORL000000002764 | slc14eyp-8ff7.4 | slc14eyp-8ff7.4 [Source:ZFIN,Acc:ZDB-GENE-091204-252]                                                            | 5.382815724 | -0.354390362 | -3.29617531  | 2.44151572   |
| ENSRORL000000010322 | cpb1            | carboxypeptidase B1 [Source:NCBI gene,Acc:101169819]                                                             | 7.051475306 | 0.985571272  | -6.777844683 | -0.711455828 |
| ENSRORL00000007955  | hoxc4           | Oryzias latipes homeobox C4 (hoxc4), mRNA [Source:RefSeq, mRNA,Acc:NM_001104878]                                 | 3.469530974 | 0.69280756   | -0.623429459 | 0.247144143  |
| ENSRORL00000013386  | tmed6           | transmembrane G24 trafficking protein 6 [Source:ZFIN,Acc:ZDB-GENE-131211-192]                                    | 6.210161904 | 3.275843885  | -3.409458423 | -0.473655099 |
| ENSRORL000000002030 | gb              | Oryzias latipes hemoglobin beta-1-like (gb), mRNA [Source:RefSeq, mRNA,Acc:NM_001278824]                         | 6.325032807 | 0.111864033  | -3.950626181 | 2.263027464  |
| ENSRORL00000007672  | -               | -                                                                                                                | 5.652550364 | 1.1307624    | -3.84447124  | 0.677801249  |
| ENSRORL000000010663 | ela3i           | chymotrypsin-like elastase family member 2A [Source:NCBI gene,Acc:101165737]                                     | 10.01339013 | 3.57369657   | -17.5845459  | -11.14479206 |
| ENSRORL000000012158 | rab25a          | RAB25, member Ras oncogene family member 2A [Source:ZFIN,Acc:ZDB-GENE-041212-69]                                 | 5.827123876 | -0.257157534 | -3.240282519 | 2.944482738  |
| ENSRORL00000007893  | -               | -                                                                                                                | 7.288083566 | -11.10417938 | -4.517937813 | 13.83083009  |
| ENSRORL00000005173  | casz1           | castor zinc finger 1 [Source:ZFIN,Acc:ZDB-GENE-061031-108]                                                       | 2.492966077 | -0.497476895 | -3.034956522 | -0.044028601 |
| ENSRORL000000015899 | -               | -                                                                                                                | 4.021738524 | -2.534824635 | -4.075888238 | 2.481161094  |
| ENSRORL00000007133  | -               | -                                                                                                                | 3.471395602 | -13.15945603 | -3.25709673  |              |

|                     |                |                                                                                                  |             |              |              |              |
|---------------------|----------------|--------------------------------------------------------------------------------------------------|-------------|--------------|--------------|--------------|
| ENSRGLG0000012482   | hit2b          | four and a half LIM domains 2b [Source:ZFIN;Acc:ZDB-GENE-041010-121]                             | 4.040670879 | -0.689022887 | -3.951841921 | 0.778335052  |
| ENSRGLG0000015280   | ZC3H12D        | zinc finger CCHC-type containing 12D [Source:HGNC Symbol;Acc:HGNC:21175]                         | 4.520462764 | 1.323955134  | -2.234744924 | 0.962247948  |
| ENSRGLG0000017965   | dapk3          | death associated protein kinase 3 [Source:NCBI gene;Acc:101188492]                               | 3.067270324 | 2.114616104  | 1.612597984  | 2.565737302  |
| ENSRGLG0000007807   | rims2b         | RNA binding motif, single stranded interacting protein 2b [Source:ZFIN;Acc:ZDB-GENE-040803-511]  | 3.245844635 | 2.616493411  | -0.102917847 | -0.383061652 |
| ENSRGLG0000003778   | malb           | myelin and lymphocyte protein-like [Source:NCBI gene;Acc:101155876]                              | 3.444916317 | 0.314675256  | -0.253526558 | 2.877199395  |
| ENSRGLG0000000818   | fat1a          | FAT atypical cadherin 1a [Source:ZFIN;Acc:ZDB-GENE-050425-1]                                     | 3.028095048 | 0.917585545  | -1.605760033 | 1.505234235  |
| ENSRGLG0000003230   | -              | corticotropin-releasing factor-binding protein [Source:NCBI gene;Acc:101156980]                  | 4.103100836 | -11.72416849 | -3.214970114 | 12.61289631  |
| ENSRGLG0000013393   | -              | -                                                                                                | 3.278520064 | -1.114789866 | -2.450979318 | -0.288764633 |
| ENSRGLG0000006697   | map3k10        | mitogen-activated protein kinase kinase 10 [Source:ZFIN;Acc:ZDB-GENE-050419-112]                 | 4.989611411 | 0.778796774  | -1.772456752 | 2.438838829  |
| ENSRGLG0000007888   | tdp5a          | P53, Rb1, GGF and p49 domain containing 5a [Source:ZFIN;Acc:ZDB-GENE-090429-3]                   | 4.982918789 | 2.401042188  | -0.011140641 | 2.571220544  |
| ENSRGLG00000008627  | copcd2         | pouey domain containing 2 [Source:NCBI gene;Acc:101170131]                                       | 3.926474855 | -2.04467981  | -1.119759843 | 0.762520529  |
| ENSRGLG0000013644   | -              | -                                                                                                | 4.651016141 | 0.082959982  | -8.830075408 | 0.738468066  |
| ENSRGLG00000005923  | prf1a          | proctin receptor a [Source:ZFIN;Acc:ZDB-GENE-080103-2]                                           | 4.397184781 | 0.458533916  | -1.268379254 | 2.67075623   |
| ENSRGLG0000006052   | DOK7           | docking protein 7 [Source:HGNC Symbol;Acc:HGNC:26594]                                            | 3.711645127 | 1.36660147   | -0.87660594  | 1.466877845  |
| ENSRGLG00000007210  | tmprss13a      | transmembrane serine protease 13a [Source:ZFIN;Acc:ZDB-GENE-090309-3]                            | 4.388386449 | 0.342651045  | -0.306672727 | 2.63195244   |
| ENSRGLG00000001727  | noxa1          | NADPH oxidase activator 1 [Source:ZFIN;Acc:ZDB-GENE-050913-28]                                   | 4.914190217 | 0.969398713  | -3.602845505 | 0.342432195  |
| ENSRGLG00000017167  | tmem200a       | transmembrane protein 200A [Source:ZFIN;Acc:ZDB-GENE-040724-81]                                  | 3.276279029 | 1.944003602  | -1.940297919 | -0.6081862   |
| ENSRGLG00000008314  | -              | -                                                                                                | 6.225227007 | 2.472159241  | -1.560358249 | 2.193194063  |
| ENSRGLG00000015775  | adora2aa       | adenosine A2a receptor a [Source:ZFIN;Acc:ZDB-GENE-080723-28]                                    | 5.759024461 | 2.581598369  | -1.740793057 | 1.437126706  |
| ENSRGLG00000009455  | lam20ca        | family with sequence similarity 20, member Ca [Source:ZFIN;Acc:ZDB-GENE-130529-759]              | 3.174251416 | 0.759921342  | -0.107369257 | 1.34112851   |
| ENSRGLG00000006001  | ad3b3          | adducin 3 (gamma) b [Source:ZFIN;Acc:ZDB-GENE-080718-6]                                          | 3.897416475 | 2.661571946  | -0.029920171 | 1.206409203  |
| ENSRGLG0000001062   | mctp1b         | multiple C2 domains, transmembrane 1b [Source:ZFIN;Acc:ZDB-GENE-090313-382]                      | 4.304010036 | 3.343102685  | -0.867541213 | 1.00385211   |
| ENSRGLG00000003626  | ofmln1b        | olfactomedin 1b [Source:NCBI gene;Acc:101160252]                                                 | 3.940923833 | 1.436640576  | -1.221378909 | 0.28398997   |
| ENSRGLG0000005995   | sulf1a6        | sulfotransferase family 1A member 4 [Source:NCBI gene;Acc:100125513]                             | 3.459076404 | 1.623905277  | -2.168009801 | -0.332353833 |
| ENSRGLG0000016110   | -              | -                                                                                                | 6.156951286 | 3.063470661  | -2.538390303 | 0.557126082  |
| ENSRGLG00000014658  | col5a2a        | collagen, type V, alpha 2a [Source:ZFIN;Acc:ZDB-GENE-030616-13]                                  | 4.1099722   | 1.538913392  | -2.960706024 | -0.389062483 |
| ENSRGLG000000010340 | si.ch211-285f1 | si.ch211-285f1.1 [Source:ZFIN;Acc:ZDB-GENE-090607-77]                                            | 3.102813598 | 0.877112586  | -1.22545544  | 1.000670521  |
| ENSRGLG000000012270 | tmc8           | transmembrane channel-like 8 [Source:ZFIN;Acc:ZDB-GENE-080114-2]                                 | 4.15009734  | 1.833795088  | -2.225118562 | 0.091669303  |
| ENSRGLG0000005095   | stgs1 (1 of m) | prostaglandin-endoperoxide synthase 1 [Source:ZFIN;Acc:ZDB-GENE-020530-1]                        | 3.874894712 | 2.107335716  | -1.957549931 | -0.189516498 |
| ENSRGLG00000016556  | epor           | erythropoietin receptor [Source:NCBI gene;Acc:101163579]                                         | 4.945361004 | 0.459058895  | -2.37281736  | -0.11406902  |
| ENSRGLG00000002378  | gata5          | GATA binding protein 5 [Source:ZFIN;Acc:ZDB-GENE-980526-340]                                     | 3.891284209 | 2.133357094  | -0.712327363 | 1.048095217  |
| ENSRGLG0000011358   | -              | -                                                                                                | 3.461453107 | -0.435713177 | -3.052629824 | 0.804502713  |
| ENSRGLG0000007935   | hox2b          | Oryxias latipes homeobox Cb (hox2b), mRNA [Source:RefSeq mRNA;Acc:NM_0163250]                    | 3.457910947 | 1.089644107  | -1.746035828 | 0.622896052  |
| ENSRGLG00000006224  | tgmb5l         | transglutaminase 5, like [Source:ZFIN;Acc:ZDB-GENE-110411-176]                                   | 3.557556321 | -0.095230723 | -1.699915602 | 1.9533914    |
| ENSRGLG0000013083   | -              | -                                                                                                | 6.719332656 | 1.724741547  | -1.425415613 | 2.565890129  |
| ENSRGLG0000012566   | dsela          | dermatan sulfate epimerase like a [Source:ZFIN;Acc:ZDB-GENE-030131-7517]                         | 4.222584146 | 2.547209171  | -1.706681231 | -0.030821364 |
| ENSRGLG00000010158  | DACT1          | dishevelled binding antagonist of beta catenin 1 [Source:HGNC Symbol;Acc:HGNC:17748]             | 3.586898885 | 1.423745336  | -0.618326959 | 1.545310803  |
| ENSRGLG00000011821  | -              | -                                                                                                | 3.088962739 | 0.11844079   | -0.992623897 | 1.97838397   |
| ENSRGLG0000016887   | vegfab         | vascular endothelial growth factor Ab [Source:ZFIN;Acc:ZDB-GENE-030131-4605]                     | 3.937319236 | 3.225007841  | 1.795461192  | 2.463599988  |
| ENSRGLG00000012084  | trf83          | Int1RIM family, member 83 [Source:ZFIN;Acc:ZDB-GENE-031002-111]                                  | 6.441977174 | 1.869637057  | -3.139648676 | 1.433174934  |
| ENSRGLG00000017214  | -              | interferon alpha-inducible protein 27-like protein 2 [Source:NCBI gene;Acc:101155558]            | 5.695111848 | -0.314818867 | -5.601418588 | 0.408996984  |
| ENSRGLG0000011345   | kirrel1a       | kirie like rephrin family adhesion molecule 1a [Source:ZFIN;Acc:ZDB-GENE-040426-2128]            | 3.349997608 | 0.989800543  | -1.465473546 | 0.89520855   |
| ENSRGLG00000005021  | -              | -                                                                                                | 4.161529169 | 1.634953584  | 0.192738733  | 2.719798590  |
| ENSRGLG000001937    | cyp11c2        | cytochrome P450, family 1, subfamily C, polypeptide 2 [Source:ZFIN;Acc:ZDB-GENE-050705-1]        | 3.364389098 | 2.243578864  | -1.442523864 | -0.321228292 |
| ENSRGLG00000010043  | -              | -                                                                                                | 3.189333566 | 2.116567544  | 0.660588265  | 1.733838973  |
| ENSRGLG00000007120  | -              | -                                                                                                | 4.359733866 | 2.399379677  | 0.629562662  | 2.234748602  |
| ENSRGLG00000012589  | foxc1          | Oryxias latipes forkhead box C1 (foxc1), mRNA [Source:RefSeq mRNA;Acc:NM_01160451]               | 17.41564374 | 12.50029168  | -3.019052491 | 1.89676639   |
| ENSRGLG00000013232  | -              | -                                                                                                | 3.108653669 | 0.768629856  | -1.265808944 | 1.074699448  |
| ENSRGLG000000000000 | doc9b          | dedicator of cytokinesis 9b [Source:ZFIN;Acc:ZDB-GENE-090916-2]                                  | 3.114297783 | 0.829632501  | -0.723287444 | 1.561862355  |
| ENSRGLG00000012302  | scrib          | scribble planar cell polarity protein [Source:ZFIN;Acc:ZDB-GENE-030616-572]                      | 3.174071444 | 1.005525543  | -0.872261345 | 1.296769427  |
| ENSRGLG00000011752  | -              | -                                                                                                | 4.115908297 | 2.586607373  | -1.656640037 | -0.12631978  |
| ENSRGLG00000015664  | rga5           | integrin, alpha 5 (fibronectin receptor, alpha polypeptide) [Source:ZFIN;Acc:ZDB-GENE-031116-52] | 4.422230213 | 1.813017357  | -1.059746508 | 1.549951741  |
| ENSRGLG00000001444  | ttc7a          | tetratricopeptide repeat domain 7A [Source:ZFIN;Acc:ZDB-GENE-010319-27]                          | 6.258332859 | 2.326592802  | -1.330723205 | 2.601497991  |
| ENSRGLG00000003462  | -              | -                                                                                                | 16.4908443  | 12.04407645  | -2.970725243 | 1.476510956  |
| ENSRGLG00000001955  | -              | -                                                                                                | 3.770305076 | 1.543352308  | -3.355832378 | -1.128398063 |
| ENSRGLG00000002772  | cdc42ep1a      | CDC42 effector protein (Rho GTPase binding) 1a [Source:ZFIN;Acc:ZDB-GENE-121128-3]               | 3.374649178 | 1.140165167  | -0.613882184 | 1.161896541  |
| ENSRGLG00000017217  | MEP1B          | mesprin A subunit beta [Source:HGNC Symbol;Acc:HGNC:7020]                                        | 6.730845105 | -11.31815299 | -6.593030314 | 11.45647763  |
| ENSRGLG00000012539  | hrl1           | Kruppel-like factor 17 [Source:ZFIN;Acc:ZDB-GENE-010129-11]                                      | 5.744249129 | 0.135524002  | -3.207883082 | 2.401326985  |
| ENSRGLG00000015821  | -              | -                                                                                                | 3.7037371   | -1.190263554 | -0.75469573  |              |
| ENSRGLG00000016642  | lam84a         | family with sequence similarity 84 member A [Source:NCBI gene;Acc:101174970]                     | 5.641135781 | 2.499514647  | -0.74099073  | 2.401116634  |

|                     |            |                                                                                                    |             |              |              |              |             |             |              |
|---------------------|------------|----------------------------------------------------------------------------------------------------|-------------|--------------|--------------|--------------|-------------|-------------|--------------|
| ENSRGLG000000006029 | ndc83      | N-deacetylase/N-sulfotransferase (heparan glucosaminyl) 3 [Source:ZFIN;Acc:ZDB-GENE-090312-189]    |             |              |              | 3.65271495   | 0.913276734 | -4.35435922 | -0.695514752 |
| ENSRGLG00000009533  | igmn       | immunoglobulin M [Source:NCBI gene;Acc:101163371]                                                  | 4.701500574 | 0.253352104  | -4.767591578 | -0.31895838  |             |             |              |
| ENSRGLG00000009933  | arg2       | arginase 2 [Source:ZFIN;Acc:ZDB-GENE-090131-1334]                                                  | 4.781815136 | 0.546970263  | -3.743513486 | 0.4917389302 |             |             |              |
| ENSRGLG00000000967  | -          | -                                                                                                  | 7.644735293 | 2.694762566  | -5.356201522 | -0.405743881 |             |             |              |
| ENSRGLG00000013810  | -          | -                                                                                                  | 6.697046068 | 1.897526888  | -5.178992585 | -0.375845401 |             |             |              |
| ENSRGLG00000005600  | -          | -                                                                                                  | 15.68064055 | 0.0          | -15.80063533 |              |             |             |              |
| ENSRGLG00000004007  | glax2      | 5-aminolevulinic synthase, erythroid-specific, mitochondrial [Source:NCBI gene;Acc:100049501]      | 6.29557672  | 0.671191826  | -4.352806609 | 1.272064175  |             |             |              |
| ENSRGLG00000007077  | -          | -                                                                                                  | 5.853184413 | 1.002907168  | -3.048617038 | 1.804734783  |             |             |              |
| ENSRGLG00000006078  | trmt3a     | tropinon T, fast skeletal muscle isoforms [Source:NCBI gene;Acc:101157127]                         | 6.587476683 | 1.499037608  | -6.11879836  | -1.0298783   |             |             |              |
| ENSRGLG00000013930  | malfb      | orthogone homolog Bb [Source:ZFIN;Acc:ZDB-GENE-01065-4]                                            | 4.685064799 | 1.832261703  | -3.009594729 | -0.156306813 |             |             |              |
| ENSRGLG00000010760  | -          | -                                                                                                  | 5.49645753  | -1.057892327 | -3.857719551 | 2.697048771  |             |             |              |
| ENSRGLG00000011630  | -          | gclI death-inducing p53-target protein 1 homolog [Source:NCBI gene;Acc:101169836]                  | 7.595785497 | 3.261600213  | -4.032128454 | 3.02528288   |             |             |              |
| ENSRGLG00000015985  | -          | -                                                                                                  | 6.302628336 | 0.004749658  | -3.478952543 | 2.819411164  |             |             |              |
| ENSRGLG00000006594  | mmp25b     | matrix metalloproteinase 25b [Source:ZFIN;Acc:ZDB-GENE-100308-4]                                   | 5.605909098 | 2.94362532   | -3.061523891 | -0.386665612 |             |             |              |
| ENSRGLG00000016348  | -          | -                                                                                                  | 4.272149821 | -0.032756486 | -24.58458661 | 0.095454648  |             |             |              |
| ENSRGLG00000010229  | konj13     | potassium inwardly-rectifying channel, subfamily 1, member 13 [Source:ZFIN;Acc:ZDB-GENE-070124-11] | 4.987826839 | 2.153151861  | -4.132808782 | -1.297648452 |             |             |              |
| ENSRGLG0000001254   | -          | -                                                                                                  | 1.548564131 | -0.328293    | -3.879836083 | 2.001957895  |             |             |              |
| ENSRGLG00000009896  | hoxc13a    | homeobox C13 [Source:NCBI gene;Acc:101172814]                                                      | 4.959653286 | -1.051186244 | -4.418370027 | 2.592947329  |             |             |              |
| ENSRGLG00000006812  | -          | -                                                                                                  | 2.811714711 | 2.61497375   | -15.68852161 | -15.49179208 |             |             |              |
| ENSRGLG00000012266  | pl81       | elastin-1 [Source:NCBI gene;Acc:101168586]                                                         | 4.707770283 | 0.194524432  | -3.452981566 | 1.060768847  |             |             |              |
| ENSRGLG00000006922  | -          | -                                                                                                  | 7.184633081 | 1.456907167  | -4.997437283 | 1.007766874  |             |             |              |
| ENSRGLG00000010552  | sicker-4g  | -                                                                                                  | 5.872529451 | 1.721471199  | -3.528729587 | 0.622811846  |             |             |              |
| ENSRGLG00000000692  | rho        | ras homolog family member H [Source:ZFIN;Acc:ZDB-GENE-060228-7]                                    | 16.26812344 | 13.18025262  | -3.024804484 | 0.063534741  |             |             |              |
| ENSRGLG00000009587  | pvalb1 (1) | parvalbumin beta [Source:NCBI gene;Acc:105353532]                                                  | 5.928888408 | -0.56628185  | -7.240173716 | -0.746517906 |             |             |              |
| ENSRGLG0000013851   | konj16     | potassium inwardly-rectifying channel, subfamily 1, member 16 [Source:ZFIN;Acc:ZDB-GENE-130603-81] | 5.980046509 | -11.66614854 | -7.003876201 | 10.64283683  |             |             |              |
| ENSRGLG00000012348  | ogal       | O-GlcNAcase like [Source:ZFIN;Acc:ZDB-GENE-110914-153]                                             | 3.278464098 | -1.099027411 | -3.455158196 | 0.922961818  |             |             |              |
| ENSRGLG00000015198  | -          | -                                                                                                  | 2.923409173 | -12.82938588 | -6.616321963 | 12.13889501  |             |             |              |
| ENSRGLG00000011298  | rab25b     | RAB25, member RAS oncogene family [Source:NCBI gene;Acc:101121278]                                 | 4.468364823 | 1.164819041  | -3.2570795   | 0.046951516  |             |             |              |
| ENSRGLG00000012439  | col9b      | chondromedin (C-C motif) receptor 9b [Source:ZFIN;Acc:ZDB-GENE-070301-3]                           | 4.971399848 | -0.121162999 | -3.16903905  | 1.924029293  |             |             |              |
| ENSRGLG00000015459  | -          | -                                                                                                  | 5.785536014 | 1.22045387   | -3.050392135 | 1.515205243  |             |             |              |
| ENSRGLG00000009593  | vill       | villin-like [Source:ZFIN;Acc:ZDB-GENE-081222-11]                                                   | 5.437087028 | -0.637315021 | -3.217177521 | 2.857713792  |             |             |              |
| ENSRGLG00000014843  | cs         | complement C8 [Source:NCBI gene;Acc:101156293]                                                     | 5.784657513 | 0.88151458   | -4.717254525 | 3.02125527   |             |             |              |
| ENSRGLG0000012551   | -          | -                                                                                                  | 5.462520903 | 0.822024862  | -4.610292482 | 0.48975388   |             |             |              |
| ENSRGLG0000016840   | shdb       | Src homology 2 domain containing transforming protein D, N [Source:ZFIN;Acc:ZDB-GENE-090131-6059]  | 3.507133889 | 0.483387053  | -3.209671168 | -0.18441982  |             |             |              |
| ENSRGLG00000013436  | col10a1a   | collagen, type X, alpha 1a [Source:ZFIN;Acc:ZDB-GENE-030131-8873]                                  | 8.251319674 | 3.937806087  | -3.523429373 | 0.790570277  |             |             |              |
| ENSRGLG0000014421   | cyp1a      | Oryxias latipes cytochrome P450 1A (cyp1a), mRNA [Source:RefSeq mRNA;Acc:NM_0105087]               | 3.839113566 | 1.633852643  | -4.616752643 | -2.41100987  |             |             |              |
| ENSRGLG0000005986   | -          | -                                                                                                  | 4.309168752 | -2.277067932 | -4.40746576  | 2.179260585  |             |             |              |
| ENSRGLG0000013898   | SLC6A18    | solute carrier family 6 member 18 [Source:HGNC Symbol;Acc:HGNC:26441]                              | 4.637186667 | -1.029780999 | -3.203851772 | 2.463599988  |             |             |              |
| ENSRGLG0000001423   | foxo3      | forkhead box A3 [Source:ZFIN;Acc:ZDB-GENE-980526-423]                                              | 6.403827935 | 0.270875174  | -3.244336603 | 2.889100965  |             |             |              |
| ENSRGLG00000000591  | TNNI2 (1)  | tropinin I2, fast skeletal type [Source:HGNC Symbol;Acc:HGNC:11946]                                | 4.129144418 | -1.817249628 | -5.770261882 | 0.176617996  |             |             |              |
| ENSRGLG00000013976  | -          | -                                                                                                  | 9.366266781 | 2.78172817   | -4.317149118 | 2.2678       |             |             |              |

|                      |            |                                                                                                                                    |              |              |              |              |
|----------------------|------------|------------------------------------------------------------------------------------------------------------------------------------|--------------|--------------|--------------|--------------|
| ENSORLG0000004055    | -          | -                                                                                                                                  | 5.350158156  | 1.429022214  | -3.953125206 | -0.031504297 |
| ENSORLG0000001329    | -          | -                                                                                                                                  | 5.779963401  | 0.766907223  | -1.451477261 | 3.562062621  |
| ENSORLG00000006354   | gdact.3    | gamma-glutamylamine cyclotransferase, tandem duplicate 3 [Source:ZFIN;Acc.ZDB-GENE-07024-28]                                       | 3.604489302  | 0.887490644  | -1.00972097  | 1.707762959  |
| ENSORLG00000011757   | pdact1     | phosphotyrosine interaction domain containing 1 [Source:ZFIN;Acc.ZDB-GENE-050320-72]                                               | 4.180328707  | 2.614278167  | -0.73109802  | 0.835437606  |
| ENSORLG00000004895   | hic1       | hypermethylated in cancer 1 [Source:ZFIN;Acc.ZDB-GENE-040713-7]                                                                    | 4.741297515  | 2.907140123  | -2.173408291 | -0.338765767 |
| ENSORLG00000011311   | tblc1d4    | TBC1 domain family, member 4 [Source:ZFIN;Acc.ZDB-GENE-030313-9881]                                                                | 3.105703903  | 0.375095999  | -1.492734903 | 1.238357772  |
| ENSORLG00000000313   | lyg2       | lysyzyme g-like 2 [Source:ZFIN;Acc.ZDB-GENE-090917-2]                                                                              | 5.685368891  | 1.487572301  | -3.276936994 | 0.921344511  |
| ENSORLG00000018096   | TWIST2     | twist family BHLH transcription factor 2 [Source:HGNC;Symbol:AC:HGN20670]                                                          | 15.762701521 | 10.35208758  | -1.455523256 | 3.953570942  |
| ENSORLG00000000284   | cdkn1a     | cyclin-dependent kinase inhibitor 1A [Source:ZFIN;Acc.ZDB-GENE-070705-7]                                                           | 5.227381405  | 3.108232557  | -0.754840374 | 1.364703844  |
| ENSORLG00000000766   | -          | -                                                                                                                                  | 4.75727743   | 0.474807678  | -1.532013667 | 2.750940244  |
| ENSORLG00000007590   | ablim3     | actin binding LIM protein family member 3 [Source:NCBI;Gene:Acc:101163501]                                                         | 4.230484184  | 2.434513239  | -0.446114891 | 1.350341683  |
| ENSORLG000000003978  | -          | -                                                                                                                                  | 7.503131872  | 2.312603074  | -2.063745843 | 3.12726757   |
| ENSORLG00000010657   | itga4      | integrin alpha 4 [Source:ZFIN;Acc.ZDB-GENE-110411-108]                                                                             | 4.352232263  | 2.549889993  | -0.103445409 | 1.699384458  |
| ENSORLG00000002702   | MLL7       | MLL7, PHD finger containing [Source:HGNC;Symbol:AC:HGN21962]                                                                       | 4.737098759  | 2.265162846  | -1.39494871  | 1.13292543   |
| ENSORLG00000007298   | MED13L     | mediator complex subunit 13 like [Source:HGNC;Symbol:AC:HGN22962]                                                                  | 4.139505453  | 2.679371442  | -0.890273025 | 0.570344163  |
| ENSORLG00000008655   | -          | -                                                                                                                                  | 6.408040617  | 0.107438137  | -2.136945497 | 4.254138552  |
| ENSORLG00000012052   | dusp10     | dual specificity phosphatase 10 [Source:NCBI;Gene:Acc:101157461]                                                                   | 4.574307111  | -0.093404811 | -2.269417947 | 2.395778153  |
| ENSORLG00000018040   | zfye1      | zinc finger, FYVE domain containing 1 [Source:ZFIN;Acc.ZDB-GENE-131205-11]                                                         | 3.097006405  | 0.319031757  | -1.502860749 | 1.275598050  |
| ENSORLG00000014020   | -          | -                                                                                                                                  | 17.89539351  | 10.05765354  | -3.894655718 | 3.968719399  |
| ENSORLG00000015720   | zgc:77158  | solute carrier family 45 member 3 [Source:NCBI;Gene:Acc:101158020]                                                                 | 3.051235891  | 1.52042647   | -0.405072949 | 1.18220617   |
| ENSORLG00000003284   | mrc2       | mannose receptor, C type 2 [Source:ZFIN;Acc.ZDB-GENE-090915-31]                                                                    | 4.464168338  | 1.696473609  | -1.778477316 | 0.987702796  |
| ENSORLG000000015457  | amot2a     | angiominotin-like 2 [Source:NCBI;Gene:Acc:101161303]                                                                               | 3.640737722  | 1.750838431  | -1.190847689 | 0.10306864   |
| ENSORLG00000013899   | nkd1       | naked outside homolog 1 (Drosophila) [Source:ZFIN;Acc.ZDB-GENE-061108-3]                                                           | 4.466597977  | 2.327577117  | -0.782596453 | 1.356908355  |
| ENSORLG00000002521   | treh       | trehalase (brush-border membrane glycoprotein) [Source:ZFIN;Acc.ZDB-GENE-070912-34]                                                | 5.817790829  | -0.278056841 | -3.328409124 | 2.767940047  |
| ENSORLG000000005426  | -          | -                                                                                                                                  | 5.177969434  | 2.651738019  | -0.302146453 | 2.224569589  |
| ENSORLG00000010182   | mgst3a     | microsomal glutathione S-transferase 3 [Source:NCBI;Gene:Acc:101173739]                                                            | 3.528937529  | 0.54666173   | -1.813279778 | 1.614907075  |
| ENSORLG00000016196   | rgl2       | ral guanine nucleotide dissociation stimulator-like 2 [Source:ZFIN;Acc.ZDB-GENE-010313-11]                                         | 4.740882991  | 1.169571299  | -2.315995011 | 1.255801173  |
| ENSORLG000000003345  | palld      | paladin, cytoskeletal associated protein [Source:ZFIN;Acc.ZDB-GENE-041014-252]                                                     | 3.170825942  | 1.387923528  | -1.854360395 | -0.070793066 |
| ENSORLG000000007531  | -          | -                                                                                                                                  | 4.460977255  | 2.989400836  | -0.60919428  | 0.82826662   |
| ENSORLG00000006858   | wsc2l2     | WSC domain containing 2 [Source:NCBI;Gene:Acc:101154729]                                                                           | 4.812573275  | 3.100158566  | 0.665668975  | 2.378567539  |
| ENSORLG00000002386   | hfp2a      | LHFPL tetraspan subfamily member 2 [Source:NCBI;Gene:Acc:101175331]                                                                | 5.007506323  | 0.811724136  | -2.745869992 | 1.45039635   |
| ENSORLG000000101237  | olq6c      | Oryzias latipes membrane quanyilin cyclase (olq6), mRNA [Source:RefSeq; mRNA:Acc:NM_001105098]                                     | 5.201526252  | -0.061060329 | -3.062308942 | 2.200709879  |
| ENSORLG00000016366   | atger1b    | prostaglandin E receptor 1b (subtype EP1) [Source:ZFIN;Acc.ZDB-GENE-100922-278]                                                    | 5.305527367  | 2.982718868  | -1.172612331 | 1.150679578  |
| ENSORLG00000010292   | ednr       | Oryzias latipes endothelin receptor (ednr), mRNA [Source:RefSeq; mRNA:Acc:NM_001104944]                                            | 3.589089737  | 2.305690704  | -2.12977851  | -0.899003096 |
| ENSORLG000000005147  | pdha1b     | prolyl 4-hydroxylase, alpha polypeptide 1b [Source:ZFIN;Acc.ZDB-GENE-030313-4089]                                                  | 3.08494512   | 1.718995493  | -1.01199675  | 1.245516462  |
| ENSORLG0000001065    | -          | -                                                                                                                                  | 18.37684625  | 0            | -3.104679259 | 1.732265748  |
| ENSORLG00000010473   | serpin1    | serpin peptidase inhibitor, clade E (nexin), plasminogen activator inhibitor type 1, member 1 [Source:ZFIN;Acc.ZDB-GENE-070912-60] | 5.137394453  | 1.058556847  | -3.442300203 | 0.637023042  |
| ENSORLG00000012347   | gsna       | galactin a [Source:ZFIN;Acc.ZDB-GENE-030131-9653]                                                                                  | 5.678829151  | 1.582324287  | -2.625587729 | 1.471402075  |
| ENSORLG000000007828  | slpaa      | plasmalemma vesicle associated protein a [Source:ZFIN;Acc.ZDB-GENE-070912-432]                                                     | 4.839380401  | 0.77239819   | -2.298946251 | 1.768526123  |
| ENSORLG00000003335   | -          | -                                                                                                                                  | 5.441172113  | 3.12490293   | -2.471782767 | -0.155041106 |
| ENSORLG00000012922   | znp3a3     | patatin-like phospholipase domain containing 3 [Source:ZFIN;Acc.ZDB-GENE-040718-27]                                                | 3.972029247  | 0.870727382  | -1.571956368 | 1.530189951  |
| ENSORLG000000007531  | -          | -                                                                                                                                  | 3.20871299   | 2.277090599  | 0.540690656  | 1.478189575  |
| ENSORLG000000004491  | lrm11a     | formin-like 1a [Source:ZFIN;Acc.ZDB-GENE-120215-83]                                                                                | 4.314908271  | 3.347707238  | -0.486541531 | 0.4811435    |
| ENSORLG00000011631   | fox2       | forkhead box J2 [Source:ZFIN;Acc.ZDB-GENE-100922-240]                                                                              | 5.348232584  | 2.23647502   | -1.519694421 | 1.595242394  |
| ENSORLG00000016558   | cdap2      | CTD (carboxy-terminal domain, RNA polymerase II, polypeptide A) small phosphatase 2 [Source:ZFIN;Acc.ZDB-GENE-030131-184]          | 3.742699975  | 1.580812455  | -0.934269977 | 1.228099406  |
| ENSORLG000000029710a | znf710a    | zinc finger protein 710a [Source:ZFIN;Acc.ZDB-GENE-030131-5559]                                                                    | 3.415161177  | 2.231820341  | -1.13092022  | 1.005092122  |
| ENSORLG00000010300   | ztry2.1    | trypanin receptor PZ72, tandem duplicate 1 [Source:ZFIN;Acc.ZDB-GENE-980526-196]                                                   | 7.409780652  | 1.393489669  | -2.497097208 | 3.519670965  |
| ENSORLG00000004345   | ctch1      | catched 1 [Source:ZFIN;Acc.ZDB-GENE-980526-196]                                                                                    | 3.933040399  | 0.64029977   | -1.971753314 | 1.320842973  |
| ENSORLG0000001406    | nox1       | NADPH oxidase 1 [Source:NCBI;Gene:Acc:101164470]                                                                                   | 3.112440782  | -0.498468638 | -2.262183364 | 1.34921193   |
| ENSORLG00000011229   | -          | -                                                                                                                                  | 4.917018912  | 1.533206006  | -0.61224257  | 2.72055106   |
| ENSORLG00000012104   | spn3       | serine palmitoyltransferase, long chain base subunit 3 [Source:ZFIN;Acc.ZDB-GENE-041210-281]                                       | 5.834337152  | 0.897778887  | -2.1187432   | 2.818300532  |
| ENSORLG00000005691   | zgc:110239 | zgc:110239 [Source:ZFIN;Acc.ZDB-GENE-050417-107]                                                                                   | 4.541495711  | 0.799616903  | -2.40239985  | 1.339223831  |
| ENSORLG00000017277   | prng2      | proline rich G1a (G-carboxy glutamic acid) 2 [Source:ZFIN;Acc.ZDB-GENE-130625-11]                                                  | 4.762755279  | 0.993178675  | -3.313308647 | 0.456795239  |
| ENSORLG00000012137   | -          | -                                                                                                                                  | 3.062818544  | 2.518478128  | 0.797199049  | 1.342025712  |
| ENSORLG00000018358   | -          | -                                                                                                                                  | 4.420920927  | 1.0010576    | -1.567491403 | 1.852029426  |
| ENSORLG00000016759   | -          | -                                                                                                                                  | 5.593502544  | 0.967504878  | -1.934753511 | 2.691728937  |
| ENSORLG00000010228   | slmapb     | sarcolemma associated protein b [Source:ZFIN;Acc.ZDB-GENE-040426-809]                                                              | 5.537730826  | 2.549148464  | -0.425682325 | 2.563385569  |
| ENSORLG00000015782   | nep1a.1    | neprin A, alpha (PABA, peptide hydrolase), tandem duplicate 1 [Source:ZFIN;Acc.ZDB-GENE-041001-209]                                | 4.378564929  | -5.053593186 | -5.733110727 | 3.699521199  |
| ENSORLG00000002046   | coro1a     | coronin, actin binding protein, 1A [Source:ZFIN;Acc.ZDB-GENE-030131-9512]                                                          | 5.037735711  | 2.33044145   | -2.748681375 | -0.040902138 |

|                     |           |                                                                                                                                           |             |              |              |              |
|---------------------|-----------|-------------------------------------------------------------------------------------------------------------------------------------------|-------------|--------------|--------------|--------------|
| ENSORLG00000013801  | gprc5c    | G protein-coupled receptor, class C, group 5, member C [Source:ZFIN;Acc.ZDB-GENE-070928-27]                                               | 6.303697649 | 0.280613501  | -3.513205747 | 2.510363198  |
| ENSORLG000000008674 | cltgn9    | Clf and TNF related 9 [Source:ZFIN;Acc.ZDB-GENE-080303-331]                                                                               | 17.05716297 | 0            | -17.05715778 | 0            |
| ENSORLG00000015708  | sidcyp1   | complement C1q-like protein 4 [Source:NCBI;Gene:Acc:101168564]                                                                            | 5.73357242  | 2.523182233  | -3.942719463 | -0.731301938 |
| ENSORLG000000008010 | -         | -                                                                                                                                         | 17.3258941  | 10.40590729  | -5.582361985 | 1.338006005  |
| ENSORLG00000010231  | GOS2      | G0/G1 switch 2 [Source:NCBI;Gene:Acc:10156885]                                                                                            | 5.46324254  | -0.523011866 | -0.50165341  | 0.480508373  |
| ENSORLG00000009993  | slc15a2   | solute carrier family 15 (oligopeptide transporter), member 2 [Source:ZFIN;Acc.ZDB-GENE-030131-5866]                                      | 5.057322225 | 1.274697482  | -3.374659158 | 0.408450788  |
| ENSORLG0000001819   | erq2      | Oryzias latipes estrogen-related receptor gamma type 2 (erq2), mRNA [Source:RefSeq; mRNA:Acc:NM_001163092]                                | 4.21523115  | 0.83549377   | -3.447870318 | -0.067613644 |
| ENSORLG00000007994  | sox8a     | SRF (sex determining region Y) box 8a [Source:ZFIN;Acc.ZDB-GENE-130530-719]                                                               | 2.68151378  | 0.466831406  | -3.126767415 | -0.911600131 |
| ENSORLG00000012050  | slc1a1    | solute carrier family 1 (neuronal/spinal high affinity glutamate transporter, system Xag), member 1 [Source:ZFIN;Acc.ZDB-GENE-040719-414] | 5.12811671  | 0.521278599  | -3.155361974 | 1.451959586  |
| ENSORLG00000004253  | pdgfrf    | platelet derived growth factor receptor like [Source:NCBI;Gene:Acc:101185739]                                                             | 5.579981562 | -1.295697799 | -5.173881386 | 1.702292391  |
| ENSORLG00000009061  | batf      | basic leucine zipper ATF-like transcription factor [Source:NCBI;Gene:Acc:101186039]                                                       | 6.84693847  | 1.022954149  | -6.840481449 | -0.015961426 |
| ENSORLG00000017187  | myt3      | myosin light polypeptide 3, skeletal muscle [Source:ZFIN;Acc.ZDB-GENE-000322-6]                                                           | 4.771746489 | -12.47918691 | -6.769103159 | 11.48232395  |
| ENSORLG00000010189  | pdgfrf    | platelet derived growth factor receptor like [Source:NCBI;Gene:Acc:101185739]                                                             | 5.402070738 | -1.397813519 | -5.84119985  | 1.052216245  |
| ENSORLG00000004731  | zgc:13646 | zgc:13646 [Source:ZFIN;Acc.ZDB-GENE-060519-7]                                                                                             | 15.69803495 | 9.946892855  | -3.581066636 | 2.322739529  |
| ENSORLG00000000391  | zgc:13646 | zgc:13646 [Source:ZFIN;Acc.ZDB-GENE-060519-7]                                                                                             | 7.267869241 | 1.455802041  | -7.070466177 | -0.889039864 |
| ENSORLG00000010223  | crit1b    | carboxyl terminal palmitoyltransferase 1B (muscle) [Source:ZFIN;Acc.ZDB-GENE-041010-9]                                                    | 8.124898429 | 3.439354748  | -6.962367758 | 0.862367438  |
| ENSORLG0000001706   | uncl      | uncharacterized LOC101180024 [Source:NCBI;Gene:Acc:101160024]                                                                             | 16.1307637  | 9.747504889  | -16.14307117 | -9.747521673 |
| ENSORLG00000008238  | gamt      | guanidinoacetate N-methyltransferase [Source:NCBI;Gene:Acc:101166291]                                                                     | 5.694387284 | 0.990345661  | -6.374361432 | 1.030116517  |
| ENSORLG00000000349  | sich211   | uncharacterized LOC101172412 [Source:NCBI;Gene:Acc:101172412]                                                                             | 5.300496198 | 0.401587774  | -3.411665332 | -1.482738568 |
| ENSORLG00000004101  | chp2      | calponin-like EF-hand protein 2 [Source:ZFIN;Acc.ZDB-GENE-030131-5810]                                                                    | 6.657802245 | 2.015251393  | -3.619032968 | 1.0240107    |
| ENSORLG00000016167  | ihh       | Indian hedgehog [Source:HGNC;Symbol:AC:HGN5956]                                                                                           | 5.250547025 | -0.180140722 | -3.038674222 | 2.392495264  |
| ENSORLG00000011273  | col1a1b   | collagen, type I, alpha 1b [Source:ZFIN;Acc.ZDB-GENE-030131-4450]                                                                         | 5.261473093 | 2.067714767  | -4.035056545 | -0.840822291 |
| ENSORLG00000015981  | myl1      | myosin light chain 1, skeletal muscle isoform [Source:NCBI;Gene:Acc:101167500]                                                            | 3.741705665 | 0.234801104  | -6.041508633 | -2.5412596   |
| ENSORLG00000017246  | -         | -                                                                                                                                         | 7.60558836  | 1.79098806   | -6.529461132 | -0.174386675 |
| ENSORLG000000006421 | -         | -                                                                                                                                         | 5.038384624 | -0.674263864 | -4.580303358 | 1.13283015   |
| ENSORLG00000018031  | cd25a     | C-C motif chemokine 20 [Source:NCBI;Gene:Acc:101171121]                                                                                   | 6.133091934 | 0.121887856  | -3.097421201 | 2.914384299  |
| ENSORLG00000000412  | slc12a3   | solute carrier family 12 (sodium/chloride transporter), member 3 [Source:ZFIN;Acc.ZDB-GENE-030131-3506]                                   | 6.23948583  | -0.935868282 | -3.830559444 | 3.345371567  |
| ENSORLG00000009017  | -         | -                                                                                                                                         | 6.23948583  | 0.552418671  | -6.764078255 | 0.477889539  |
| ENSORLG000000002943 | dkn11b    | dkn11b [Source:ZFIN;Acc.ZDB-GENE-010328-13]                                                                                               | 18.28213443 | 0            | -4.557981041 | 13.72464404  |
| ENSORLG000000003829 | ptger4b   | prostaglandin E receptor 4 (subtype EP4) [Source:ZFIN;Acc.ZDB-GENE-060531-102]                                                            | 4.96939269  | 0.902533355  | -3.449656394 | 0.618273899  |
| ENSORLG00000012333  | tnb1      | tribbles homolog 1 [Source:NCBI;Gene:Acc:101160746]                                                                                       | 5.102628851 | 0.469903093  | -4.134893101 | 0.498314222  |
| ENSORLG00000000428  | slc5a2    | solute carrier family 5 (sodium/glucose cotransporter), member 2 [Source:ZFIN;Acc.ZDB-GENE-040426-2498]                                   | 6.037200971 | 1.129266941  | -4.383930455 | 0.52448558   |
| ENSORLG00000016178  | kcnq1     | potassium voltage-gated channel, subfamily G, member 1 [Source:ZFIN;Acc.ZDB-GENE-080200-5]                                                | 1.027269997 | -4.881392599 | -3.270174554 | 2.14572477   |
| ENSORLG00000016820  | -         | -                                                                                                                                         | 2.929521182 | -0.130242035 | -4.485256689 | -1.425009028 |
| ENSORLG00000017122  | gata3     | GATA binding protein 3 [Source:ZFIN;Acc.ZDB-GENE-992415-82]                                                                               | 16.6088462  | 10.56750932  | -3.292620433 | 2.749179261  |
| ENSORLG000000008649 | gpr11b    | gamma-glutamyltransferase 1b [Source:ZFIN;Acc.ZDB-GENE-1114048-13]                                                                        | 4.810897244 | -0.23193759  | -3.171008543 | 1.872312403  |
| ENSORLG00000000597  | anact2b   | anoctamin-2 [Source:NCBI;Gene:Acc:101154790]                                                                                              | 4.234109248 | -3.042080343 | -3.56581957  | 3.710855364  |
| ENSORLG00000014806  | tbx4      | T-box 4 [Source:NCBI;Gene:Acc:101172998]                                                                                                  | 5.365889369 | 2.97205193   | -3.781231068 | -1.388056393 |
| ENSORLG000000005938 | atp2a1    | sericolipin/endoplasmic reticulum calcium ATPase 1 [Source:NCBI;Gene:Acc:101173864]                                                       | 4.092276847 | -0.200671653 | -3.007952521 | 1.285472427  |
| ENSORLG000000005340 | ddc       | Oryzias latipes dopa decarboxylase (ddc), mRNA [Source:RefSeq; mRNA:Acc:NM_001160445]                                                     | 6.334076992 | 0.94601909   | -5.398979999 | -0.01042     |

|                     |                |                                                                                                                     |             |              |              |              |
|---------------------|----------------|---------------------------------------------------------------------------------------------------------------------|-------------|--------------|--------------|--------------|
| ENSRORG0000010564   | konk1b         | potassium two pore domain channel subfamily K member 1 [Source:NCBI gene:Acc:101174617]                             | 3.252575954 | 1.264631842  | 0.457973013  | 2.446401962  |
| ENSRORG0000003458   | ctnna1         | catenin (armadillo-associated) protein, alpha-like 1 [Source:ZFIN:Acc:ZDB-GENE-060503-507]                          | 3.102024917 | 0.645381562  | -0.153389284 | 2.303758738  |
| ENSRORG00000010246  | -              | -                                                                                                                   | 6.004844592 | 2.129377185  | -2.092467929 | 1.783483155  |
| ENSRORG0000000664   | cygb           | Oryza latipes cytoglobin (cygb), mRNA, [Source:RefSeq mRNA:NM_001104768]                                            | 5.959828209 | -10.1738775  | -2.617397257 | 13.46181322  |
| ENSRORG0000007599   | ann            | annexin associated transmembrane protein [Source:ZFIN:Acc:ZDB-GENE-060810-59]                                       | 5.942882885 | -3.140838589 | -4.331436923 | 4.75276749   |
| ENSRORG00000015266  | scla0a1        | solute carrier family 40 (iron-regulated transporter), member 1 [Source:ZFIN:Acc:ZDB-GENE-000511-8]                 | 5.295296406 | 1.059196737  | -2.25956433  | 1.930306069  |
| ENSRORG00000009221  | lhd1           | fumarylacetoacetate hydrolase domain containing 1 [Source:ZFIN:Acc:ZDB-GENE-050522-448]                             | 5.090854458 | 1.447967801  | -1.491694575 | 2.151677533  |
| ENSRORG0000007652   | tab21l         | tab-21 like 2 [Source:NCBI gene:Acc:101157187]                                                                      | 4.863033781 | 1.035286115  | -0.33988776  | 0.788340558  |
| ENSRORG0000000532   | TOR4A          | tor1a family 4 member A [Source:NCBI gene:Acc:101162538]                                                            | 2.990820516 | 5.2825134    | -2.908545453 | 2.34631814   |
| ENSRORG0000001029   | aspp4          | RAS guanine nucleotide exchange factor 4 [Source:ZFIN:Acc:ZDB-GENE-050419-110]                                      | 4.37816566  | 1.870986261  | -2.998472084 | -0.49807992  |
| ENSRORG0000006729   | emid1          | EM domain containing 1 [Source:ZFIN:Acc:ZDB-GENE-070705-40]                                                         | 3.083796942 | 2.838163064  | -1.354994066 | -1.108876175 |
| ENSRORG000000013443 | esr            | V-set immunoregulatory receptor [Source:ZFIN:Acc:ZDB-GENE-060929-716]                                               | 5.042224097 | 1.965590368  | -2.629755256 | 0.984373286  |
| ENSRORG00000005046  | -              | -                                                                                                                   | 4.148608653 | 0.913370647  | -1.999083615 | 1.236639223  |
| ENSRORG00000017885  | abca2          | ATP-binding cassette, sub-family A (ABC1), member 2 [Source:ZFIN:Acc:ZDB-GENE-050517-1]                             | 3.779694842 | -0.334201796 | -2.097529521 | 2.016851796  |
| ENSRORG00000007790  | -              | -                                                                                                                   | 16.9042197  | 14.93648982  | -2.941736899 | -0.327533594 |
| ENSRORG00000001563  | HLH1 (1 of m   | four and a half LIM domains 1 [Source:NCBI gene:Acc:101165918]                                                      | 4.571021166 | 2.058802372  | -2.833572879 | -0.920869111 |
| ENSRORG00000016902  | hfn1           | interferon induced with helicase C domain 1 [Source:ZFIN:Acc:ZDB-GENE-081104-438]                                   | 3.631466354 | 1.732742797  | 0.0861595    | 1.985368969  |
| ENSRORG00000013626  | kydyb          | kydyb domain containing 1 [Source:NCBI gene:Acc:101175588]                                                          | 5.517467317 | 0.066018334  | -2.542871114 | 2.906063539  |
| ENSRORG00000003917  | RBM51 (1 of m  | RNA binding motif single stranded interacting protein 1 [Source:ZFIN:Acc:ZDB-GENE-050801-997]                       | 4.814326863 | 2.283518575  | -0.390738259 | 2.140566666  |
| ENSRORG000000013111 | srpx2          | srpx repeat containing protein, X-linked 2 [Source:ZFIN:Acc:ZDB-GENE-110411-231]                                    | 3.798080294 | 0.907436966  | -1.528398778 | 1.345454437  |
| ENSRORG00000013938  | -              | -                                                                                                                   | 4.168524728 | 1.777864624  | -0.406049997 | 1.985058888  |
| ENSRORG00000012006  | net1           | neuroepithelial cell transforming 1 [Source:NCBI gene:Acc:101160272]                                                | 3.685911158 | 1.544993564  | -2.559790217 | -0.418387706 |
| ENSRORG00000013121  | prickle1b      | prickle homolog 1b [Source:ZFIN:Acc:ZDB-GENE-030131-2152]                                                           | 4.824762731 | 1.174709967  | -2.05817136  | 1.592367338  |
| ENSRORG00000011824  | nrb1           | nuclear receptor subfamily 0, group B, member 1 [Source:ZFIN:Acc:ZDB-GENE-030130-1]                                 | 4.044356262 | 2.457617299  | -1.266818036 | 0.320450976  |
| ENSRORG000000044411 | -              | -                                                                                                                   | 4.876351275 | 2.333034618  | -2.270723706 | 0.273077872  |
| ENSRORG00000013342  | slcf           | APBB1 complementation factor [Source:NCBI gene:Acc:101160767]                                                       | 5.366261401 | 0.572521922  | -3.963122472 | -0.380026551 |
| ENSRORG00000017583  | ppp1r13ba      | protein phosphatase 1, regulatory subunit 13ba [Source:ZFIN:Acc:ZDB-GENE-030131-8805]                               | 4.225738705 | 2.727493769  | 0.506215716  | 2.004945058  |
| ENSRORG0000000976   | terf           | transcription factor 7 [Source:ZFIN:Acc:ZDB-GENE-050222-4]                                                          | 4.593719289 | 2.135310968  | -2.105272224 | 0.353622596  |
| ENSRORG00000012651  | zswim5         | zinc finger, SWIM-type containing 5 [Source:ZFIN:Acc:ZDB-GENE-030129-30]                                            | 3.239793095 | 0.492506288  | -0.813915928 | 1.932856539  |
| ENSRORG00000005736  | myl9b          | myosin regulatory light chain 2, skeletal muscle isoform [Source:NCBI gene:Acc:101169321]                           | 5.696343789 | -0.182732175 | -5.255276121 | 0.62482156   |
| ENSRORG00000004921  | oprm1          | opioid receptor, mu 1 [Source:ZFIN:Acc:ZDB-GENE-010125-1]                                                           | 3.749919071 | -0.438533783 | -1.188460735 | 2.350494293  |
| ENSRORG00000014569  | -              | -                                                                                                                   | 3.311531227 | 0.275787934  | -0.936982817 | 2.099245064  |
| ENSRORG00000004815  | slc7a1         | solute carrier family 7 (cationic amino acid transporter + y system), member 1 [Source:ZFIN:Acc:ZDB-GENE-091116-69] | 4.981112098 | 2.043811719  | -1.82377518  | 1.144064662  |
| ENSRORG00000016675  | -              | -                                                                                                                   | 4.672870466 | 1.666101597  | -1.662596889 | 1.344749273  |
| ENSRORG00000016854  | -              | -                                                                                                                   | 4.007184909 | 1.64521913   | -0.538296282 | 1.824154328  |
| ENSRORG00000004549  | her9           | heparin sulfate proteoglycan 9 [Source:ZFIN:Acc:ZDB-GENE-011213-1]                                                  | 4.075295454 | 1.492989543  | -0.810864664 | 1.771926462  |
| ENSRORG000000101513 | marcks1b       | MARCKS-related protein [Source:NCBI gene:Acc:101173561]                                                             | 4.195399588 | 0.829567015  | -0.573315629 | 2.79299154   |
| ENSRORG00000009081  | -              | -                                                                                                                   | 3.908868258 | 1.91751119   | 0.34791413   | 2.339757145  |
| ENSRORG00000005815  | -              | -                                                                                                                   | 4.868633826 | 1.21912523   | -1.25230047  | 1.629389816  |
| ENSRORG00000016201  | phf1           | PHF finger protein 1 [Source:ZFIN:Acc:ZDB-GENE-100922-277]                                                          | 3.890541296 | 1.736839067  | -2.571388507 | -0.417181047 |
| ENSRORG00000005074  | kyru           | kyruinase [Source:NCBI gene:Acc:101174251]                                                                          | 5.813915551 | 1.315302082  | -1.765212139 | 2.7338855    |
| ENSRORG00000017608  | cx32.3         | connexin 32.3 [Source:ZFIN:Acc:ZDB-GENE-030131-1337]                                                                | 6.489282862 | 0.41086148   | -5.396394259 | 0.682297762  |
| ENSRORG00000004533  | zswim1 (1 of m | zinc finger, SWIM-type containing 6 [Source:ZFIN:Acc:ZDB-GENE-060602-4]                                             | 3.46644065  | 0.445914824  | -2.077914228 | 0.943096351  |
| ENSRORG00000013020  | ifnlr19        | tumor necrosis factor receptor superfamily, member 19 [Source:ZFIN:Acc:ZDB-GENE-030131-8760]                        | 3.8349011   | 2.51917911   | -1.090654605 | 0.225553521  |
| ENSRORG00000002232  | -              | -                                                                                                                   | 3.69240064  | 0.990862429  | -0.418089402 | 2.28417263   |
| ENSRORG00000010410  | cyth4          | cytohesin 4 [Source:ZFIN:Acc:ZDB-GENE-090624-6]                                                                     | 5.814098672 | 2.699163343  | -2.316988552 | 0.798428992  |
| ENSRORG00000008567  | srnp1-68n21    | srp1-68n21.9 [Source:ZFIN:Acc:ZDB-GENE-081105-100]                                                                  | 4.100083285 | 0.821463204  | -3.834292336 | -0.555187973 |
| ENSRORG00000012168  | ubal2          | UBA-like domain containing 2 [Source:ZFIN:Acc:ZDB-GENE-050522-185]                                                  | 4.304917621 | 1.476814004  | -0.960189184 | 1.866398909  |
| ENSRORG00000015493  | znf536         | zinc finger protein 536 [Source:ZFIN:Acc:ZDB-GENE-030616-624]                                                       | 3.028483692 | 0.686172236  | -0.679302156 | 1.663949413  |
| ENSRORG00000021247  | -              | -                                                                                                                   | 4.931220323 | 1.815779285  | -1.418041503 | 1.6978877    |
| ENSRORG00000009356  | myo7b          | myosin VIIb [Source:ZFIN:Acc:ZDB-GENE-121022-3]                                                                     | 3.687788829 | -0.077412624 | -1.7724837   | 1.993242311  |
| ENSRORG00000004341  | evl1c          | evl-1 homolog C (C. elegans) [Source:ZFIN:Acc:ZDB-GENE-091204-329]                                                  | 4.218762912 | 1.63210631   | -1.398598178 | 1.188348896  |
| ENSRORG00000013685  | -              | -                                                                                                                   | 3.638362649 | 0.947506836  | -0.82147956  | 1.86960931   |
| ENSRORG00000006724  | apcd1l         | adenomatous polyposis coli down-regulated 1-like [Source:ZFIN:Acc:ZDB-GENE-121022-3]                                | 7.243768143 | 0.951727312  | -1.941151608 | 4.351353483  |
| ENSRORG00000013459  | cxcr3.2        | chemokine (C-X-C motif) receptor 3, tandem duplicate 2 [Source:ZFIN:Acc:ZDB-GENE-041114-186]                        | 3.876178433 | 2.428704388  | -1.24994637  | 1.193965457  |
| ENSRORG00000005745  | PFKP (1 of m   | phosphofructokinase, platelet [Source:HGNC Symbol:Acc:HGNC:8878]                                                    | 5.144323205 | 1.028178527  | -2.27601857  | 1.840537928  |
| ENSRORG00000009643  | MAF            | MAP t2p transcription factor [Source:HGNC Symbol:Acc:HGNC:6776]                                                     | 5.840618696 | -0.473680954 | -3.313485165 | 3.001299745  |
| ENSRORG00000016831  | -              | -                                                                                                                   | 4.706726364 | 2.037130875  | -2.46679578  | 2.396979578  |
| ENSRORG00000002244  | shd2b          | EH domain containing 2 [Source:NCBI gene:Acc:101167588]                                                             | 4.16102109  | 2.12139155   | -2.405960399 | -0.365793779 |
| ENSRORG00000004795  | tzd8a          | frizzled class receptor 8a [Source:ZFIN:Acc:ZDB-GENE-000328-3]                                                      | 4.731696484 | 1.328273772  | -1.328772895 | 2.076134939  |
| ENSRORG00000014087  | zbtb37         | zinc finger and BTB domain containing 37 [Source:ZFIN:Acc:ZDB-GENE-050208-621]                                      | 4.829854387 | 1.13477679   | -1.315347332 | 2.380215432  |

|                    |           |                                                                                                                                           |              |              |              |              |
|--------------------|-----------|-------------------------------------------------------------------------------------------------------------------------------------------|--------------|--------------|--------------|--------------|
| ENSRORG00000000981 | slc22a7a  | solute carrier family 22 (organic anion transporter), member 7a [Source:ZFIN:Acc:ZDB-GENE-050506-52]                                      | 3.616947677  | 0.151243441  | -4.156598965 | -0.690413352 |
| ENSRORG00000014926 | plekhf1   | pleckstrin homology domain containing family F (with FYVE domain) member 1 [Source:ZFIN:Acc:ZDB-GENE-040426-1289]                         | 16.10239753  | 0            | -3.045397446 | 13.05749258  |
| ENSRORG00000006629 | bmp6      | bone morphogenetic protein 6 [Source:ZFIN:Acc:ZDB-GENE-050506-42]                                                                         | 6.149787938  | 1.140250119  | -3.104292977 | 1.90737287   |
| ENSRORG00000002168 | myl9fa    | myosin light chain, phosphorylatable, fast skeletal muscle 9a [Source:ZFIN:Acc:ZDB-GENE-940712-19]                                        | 6.300930238  | -0.52295267  | -10.94037035 | -4.116600216 |
| ENSRORG00000006554 | akab4     | AK1 homolog 4b [Source:ZFIN:Acc:ZDB-GENE-050208-140]                                                                                      | 15.70846224  | 12.17542792  | -4.387320218 | -0.858317851 |
| ENSRORG00000014546 | tfpia     | tissue factor pathway inhibitor A [Source:ZFIN:Acc:ZDB-GENE-030711-1]                                                                     | 5.160657701  | -0.189255232 | -3.008429651 | 2.340988587  |
| ENSRORG00000018163 | -         | -                                                                                                                                         | 5.038318823  | 0.806782899  | -15.97261637 | -1.174109194 |
| ENSRORG00000006079 | slc22a6l  | solute carrier family 22 member 6 [Source:NCBI gene:Acc:101168641]                                                                        | 6.877724768  | -0.701197334 | -5.630916679 | 1.948492908  |
| ENSRORG00000012350 | -         | -                                                                                                                                         | 4.6895972    | 0.4668972    | -0.189137305 | 3.15673938   |
| ENSRORG00000002933 | sich211-1 | sich211-25503 [Source:ZFIN:Acc:ZDB-GENE-141216-1131]                                                                                      | 6.381571423  | 2.774737609  | -4.235439447 | -1.663181921 |
| ENSRORG00000010086 | CLDN5     | claudin-5 [Source:NCBI gene:Acc:101166566]                                                                                                | 4.4651649    | 1.965256725  | -3.089062028 | -0.587669066 |
| ENSRORG00000009315 | col4a6    | collagen, type IV, alpha 6 [Source:ZFIN:Acc:ZDB-GENE-101001-2]                                                                            | 0.287251703  | 2.191368405  | -2.625788756 | -4.529420723 |
| ENSRORG00000014283 | -         | -                                                                                                                                         | 2.500479142  | 0.4668972    | -0.189137305 | 3.15673938   |
| ENSRORG00000009459 | sema3d    | sema domain, immunoglobulin domain (ig), short basic domain, secreted, (semaphorin) 3d [Source:ZFIN:Acc:ZDB-GENE-090715-2]                | -1.705663303 | 0.468769045  | -1.58922051  | -3.763367767 |
| ENSRORG00000012208 | mfsd4a    | major facilitator superfamily domain-containing protein 4A, like [Source:NCBI gene:Acc:101174826]                                         | -1.47350193  | -0.530983762 | -0.272458156 | -3.014491464 |
| ENSRORG00000002157 | RF0294    | small nuclear RNA SNOVD7.4 [Source:NCBI gene:Acc:113947419]                                                                               | -12.63301337 | 5.431997698  | -12.37369458 | -4.736829599 |
| ENSRORG00000015517 | -         | -                                                                                                                                         | -14.26488971 | 1.614771911  | 12.87616007  | -3.00301121  |
| ENSRORG00000017752 | slc25a25a | calcium-binding mitochondrial carrier protein ScaMC-2.4 [Source:NCBI gene:Acc:101160000]                                                  | -2.143288951 | -0.380346537 | -1.833033465 | -3.955406766 |
| ENSRORG00000002282 | ace       | angiotensin I converting enzyme (peptidyl-dipeptidase) 1 [Source:ZFIN:Acc:ZDB-GENE-030131-1826]                                           | -0.821939033 | 0.259856795  | -2.944695454 | -4.020603242 |
| ENSRORG00000019179 | paics     | phosphoribosylaminimidazole carboxylase, phosphoribosylaminimidazole succinocarboxamide synthetase [Source:ZFIN:Acc:ZDB-GENE-030131-9762] | -2.642751191 | -0.684852986 | -1.304936821 | -3.262300003 |
| ENSRORG00000007315 | -         | -                                                                                                                                         | -14.6541645  | 2.750223692  | -11.4743954  | -5.926507183 |
| ENSRORG00000011017 | -         | -                                                                                                                                         | -0.53120756  | 0.096363668  | -2.619488091 | -3.246530473 |
| ENSRORG00000012224 | gapdh     | glyceraldehyde-3-phosphate dehydrogenase [Source:NCBI gene:Acc:101172760]                                                                 | -0.915818234 | -0.610358232 | -2.768722023 | -3.073697303 |
| ENSRORG00000016951 | sh2d5     | SH2 domain containing 5 [Source:ZFIN:Acc:ZDB-GENE-060227-47]                                                                              | -2.005739197 | -0.247469437 | -1.74245824  | -3.500243016 |
| ENSRORG00000013213 | efcc1     | EF-hand and coiled-coil domain containing 1 [Source:ZFIN:Acc:ZDB-GENE-120813-3]                                                           | -2.563005554 | -0.333781493 | -1.497638367 | -3.726374517 |
| ENSRORG00000009443 | slc8a3    | solute carrier family 8 (sodium/calcium exchanger), member 3 [Source:ZFIN:Acc:ZDB-GENE-050810-1]                                          | -2.614373338 | -0.837757038 | -0.637757038 | -3.061437661 |
| ENSRORG00000004531 | wnr9b     | wingless-type MMTV integration site family, member 9b [Source:ZFIN:Acc:ZDB-GENE-080201-1]                                                 | 0.300509479  | 1.7883369    | -2.652759339 | -4.131601408 |
| ENSRORG00000013890 | -         | -                                                                                                                                         | -1.790823247 | 0.774826386  | -1.266024522 | -3.831046611 |
| ENSRORG00000002976 | -         | -                                                                                                                                         | -2.994945471 | -0.235752452 | -2.642911549 | -1.041642283 |
| ENSRORG00000014730 | nrl3-5    | nuclear factor, interleukin 3 regulated, member 5 [Source:ZFIN:Acc:ZDB-GENE-030131-7677]                                                  | -1.628282033 | -0.533268887 | -2.552972575 | -3.647501203 |
| ENSRORG00000012629 | -         | -                                                                                                                                         | -2.124446527 | -0.093257197 | -1.105107467 | -3.135811899 |
| ENSRORG00000009963 | -         | -                                                                                                                                         | 14.66765     |              |              |              |

|  |                    |                 |                                                                                                                               |             |              |              |              |
|--|--------------------|-----------------|-------------------------------------------------------------------------------------------------------------------------------|-------------|--------------|--------------|--------------|
|  | ENSRORG0000015441  | mss1b           | metastasis suppressor 1-like b [Source:ZFIN;Acc:ZDB-Gene-140718-4]                                                            | 3.031704816 | 1.487904905  | -2.543302119 | -0.999017259 |
|  | ENSRORG0000010488  | BCL11B (1 of 1) | B cell CLL/lymphoma 11B [Source:HGNC Symbol;Acc:HGNC:13222]                                                                   | 6.094672608 | 0.664132067  | -2.755211745 | 2.6786102    |
|  | ENSRORG0000011078  | naalad2         | N-acetylated alpha-linked acidic dipeptidase 2 [Source:ZFIN;Acc:ZDB-Gene-040426-1023]                                         | 4.030057483 | 1.940197537  | -2.128536655 | -0.038912743 |
|  | ENSRORG0000002625  | -               | -                                                                                                                             | 3.016001927 | 0.791652803  | 0.818919633  | 2.4029086    |
|  | ENSRORG0000012948  | -               | -                                                                                                                             | 4.14874275  | 0.478840031  | -2.305334339 | 1.417050266  |
|  | ENSRORG0000004734  | strom3b         | stromatin (PFB7)-like 3b [Source:ZFIN;Acc:ZDB-Gene-050417-366]                                                                | 5.521542886 | 1.268833773  | -2.394240111 | 1.858937399  |
|  | ENSRORG0000003814  | -               | -                                                                                                                             | 3.548627883 | 1.240637421  | -1.920674721 | 1.033102862  |
|  | ENSRORG0000010220  | -               | -                                                                                                                             | 4.633686281 | 1.191332234  | -2.379670786 | 0.872688864  |
|  | ENSRORG0000000347  | trim45          | tripartite motif containing 45 [Source:ZFIN;Acc:ZDB-Gene-070912-389]                                                          | 5.079790228 | 3.276077436  | -0.627188992 | 1.177006368  |
|  | ENSRORG0000001786  | tbl1a           | Tab, reelin signal transducer homolog 1a (Drosophila) [Source:ZFIN;Acc:ZDB-Gene-060528-1]                                     | 5.070726778 | 0.583373984  | -2.656842818 | 1.83099483   |
|  | ENSRORG0000000184  | card14          | cardiac recruitment domain family member 14 [Source:ZFIN;Acc:ZDB-Gene-093010-1]                                               | 4.603639811 | 0.183570595  | -0.776476261 | 1.809037392  |
|  | ENSRORG00000008876 | TBL1XR1         | transducin beta like 1-linked receptor 1 [Source:HGNC Symbol;Acc:HGNC:29529]                                                  | 4.135552968 | 1.470526007  | -0.04434987  | 2.621165218  |
|  | ENSRORG00000006149 | col17a1b        | collagen, type XVII, alpha 1b [Source:ZFIN;Acc:ZDB-Gene-030331-7145]                                                          | 5.575936264 | 1.99105009   | -2.457254999 | 1.310117162  |
|  | ENSRORG00000003036 | -               | -                                                                                                                             | 4.658791329 | 2.756002024  | -1.498147202 | 0.475126895  |
|  | ENSRORG0000000808  | ptprc           | protein tyrosine phosphatase, receptor type, C [Source:ZFIN;Acc:ZDB-Gene-092008-585]                                          | 3.686021237 | 2.822204123  | -1.362594811 | 0.041706781  |
|  | ENSRORG00000008434 | lgr6            | Oryzias latipes leucine rich repeat containing G protein-coupled receptor 6 (lgr6), mRNA [Source:RefSeq mRNA;Acc:NC_01728833] | 6.111868967 | 2.22104577   | -1.958461978 | 1.932856697  |
|  | ENSRORG00000006341 | SLOC24          | solute carrier family 2 member 4 [Source:NCBI gene;Acc:101158976]                                                             | 4.433611094 | 0.297475001  | -1.346718441 | 2.789903369  |
|  | ENSRORG0000017044  | ccc1            | endothelin converting enzyme 1 [Source:ZFIN;Acc:ZDB-Gene-091110-100]                                                          | 4.12692442  | 1.621562649  | -1.212024025 | 1.293822431  |
|  | ENSRORG0000016137  | ctcd2           | catched 2 [Source:ZFIN;Acc:ZDB-Gene-98026-44]                                                                                 | 4.884868797 | 0.684381466  | -1.699611643 | 2.501358558  |
|  | ENSRORG0000016787  | PKP4            | plakophilin 4 [Source:HGNC Symbol;Acc:HGNC:3026]                                                                              | 3.590405457 | 0.997017148  | -1.653805486 | 0.945335176  |
|  | ENSRORG0000003985  | ITNAS           | ichthadin AS [Source:HGNC Symbol;Acc:HGNC:3025]                                                                               | 3.162562821 | 0.32696987   | -1.429158895 | 1.129232932  |
|  | ENSRORG0000014093  | si.ch211-79k3   | uncharacterized LOC101164588 [Source:NCBI gene;Acc:101164588]                                                                 | 4.757354692 | 1.16701144   | -2.327189016 | 1.263953197  |
|  | ENSRORG0000013815  | -               | -                                                                                                                             | 5.007627033 | 0.971977601  | -1.790550578 | 2.241078552  |
|  | ENSRORG00000003722 | PRSS23          | serine protease 23 [Source:HGNC Symbol;Acc:HGNC:14370]                                                                        | 3.041818839 | 2.175194161  | -0.44345203  | 0.4454203    |
|  | ENSRORG00000003079 | KHLH4           | ketch like family member 4 [Source:HGNC Symbol;Acc:HGNC:6355]                                                                 | 3.43278748  | 2.339907165  | -0.733951071 | 0.359413372  |
|  | ENSRORG00000007168 | si.ch73-17b13   | si.ch73-17b13.3 [Source:ZFIN;Acc:ZDB-Gene-081104-245]                                                                         | 3.296533361 | 1.743791383  | -1.252971173 | 3.002552441  |
|  | ENSRORG0000016519  | RAB19           | RAB19, member RAS oncogene family [Source:HGNC Symbol;Acc:HGNC:19982]                                                         | 3.751453696 | 0.422415539  | -1.27087919  | 2.102435744  |
|  | ENSRORG0000016970  | zgc:158343      | uncharacterized LOC105354811 [Source:NCBI gene;Acc:105354811]                                                                 | 4.63091467  | 1.759953906  | -1.584425504 | 1.28701987   |
|  | ENSRORG0000015008  | -               | -                                                                                                                             | 6.444445343 | 2.675049297  | -0.837676304 | 2.93211497   |
|  | ENSRORG00000000858 | pitx1           | paired-like homeodomain 1 [Source:ZFIN;Acc:ZDB-Gene-060421-3623]                                                              | 5.305718698 | 0.429706529  | -3.159373984 | 1.717124567  |
|  | ENSRORG0000011289  | tm4sf4          | transmembrane 4, six family member 4 [Source:NCBI gene;Acc:101159982]                                                         | 17.1579969  | 13.6031023   | -0.596894437 | 2.958466613  |
|  | ENSRORG00000002533 | ngfra           | nerve growth factor receptor A (NGFR superfamily, member 16) [Source:ZFIN;Acc:ZDB-Gene-050928-1]                              | 5.307748978 | -0.313696715 | -2.113268579 | 3.508662022  |
|  | ENSRORG0000004373  | -               | -                                                                                                                             | 3.100897275 | 0.318814313  | -2.465332704 | 0.317204881  |
|  | ENSRORG00000008714 | erap2           | endoplasmic reticulum aminopeptidase 2 [Source:ZFIN;Acc:ZDB-Gene-080402-6]                                                    | 3.210156026 | 2.517209811  | -0.67530033  | 1.515102829  |
|  | ENSRORG0000017946  | apoc2 (1 of 1)  | apolipoprotein D-like [Source:NCBI gene;Acc:101159982]                                                                        | 8.428454748 | 3.278859     | -20.60613079 | -15.45634896 |
|  | ENSRORG00000002855 | rida            | reactive intermediate mine deaminase A homolog [Source:HGNC Symbol;Acc:HGNC:18997]                                            | 3.388517179 | 0.95433887   | -1.010749264 | 1.423913794  |
|  | ENSRORG00000007353 | h3s3t3b1a       | heparan sulfate (glucosamine) 3-O-sulfotransferase 3b1a [Source:ZFIN;Acc:ZDB-Gene-070202-4]                                   | 3.180130515 | 1.776281828  | -0.034825223 | 2.70105381   |
|  | ENSRORG00000005181 | zgc:101540      | uncharacterized LOC101540 [Source:NCBI gene;Acc:1011540]                                                                      | 4.929063266 | 2.498087044  | -0.605114455 | 0.768980986  |
|  | ENSRORG0000014049  | shc42e1         | short chain dehydrogenase/reductase family 42E, member 1 [Source:ZFIN;Acc:ZDB-Gene-051120-63]                                 | 3.24884381  | 0.976280857  | -1.63411425  | 1.62463688   |
|  | ENSRORG0000015156  | gabrapl2        | GABA(A) receptor-associated protein like 2 [Source:ZFIN;Acc:ZDB-Gene-040718-336]                                              | 3.096386023 | 0.971960912  | -0.019652391 | 2.105257878  |
|  | ENSRORG0000012468  | cygb1           | Oryzias latipes cytoglobin-1 (cygb1), mRNA [Source:RefSeq mRNA;Acc:NC_0104767]                                                | 3.757157462 | 1.574271953  | -2.598266401 | -0.414899543 |
|  | ENSRORG00000005881 | cyry1           | purinergic receptor P2Y1 [Source:NCBI gene;Acc:10117350]                                                                      | 4.140046394 | 2.400651003  | -0.50926431  | 1.230612376  |
|  | ENSRORG0000018030  | -               | -                                                                                                                             | 5.113148006 | 2.457468231  | -3.4867147   | -0.830552005 |
|  | ENSRORG00000008378 | -               | -                                                                                                                             | 4.50192984  | 1.290916288  | -0.101789957 | 2.19360154   |
|  | ENSRORG00000004987 | HOXA2 (1 of 2)  | homeobox A2 [Source:HGNC Symbol;Acc:HGNC:5103]                                                                                | 5.830782083 | 1.75615232   | -3.137763496 | 0.937352101  |
|  | ENSRORG0000015772  | chma2           | cholinergic A2 [Source:ZFIN;Acc:ZDB-Gene-093311-6]                                                                            | 4.292787728 | 1.051325342  | -1.68941931  | 1.572417173  |
|  | ENSRORG00000007960 | sow9            | Oryzias latipes SRY-box 9 (sow9), mRNA [Source:RefSeq mRNA;Acc:NC_01105086]                                                   | 5.005430592 | 1.40092784   | -0.903933364 | 2.70105381   |
|  | ENSRORG0000014397  | dec1b           | Oryzias latipes DLH1 protein DCL1b (dec1b), mRNA [Source:RefSeq mRNA;Acc:NC_0104732]                                          | 3.124964192 | 0.734544869  | -1.28474171  | 1.106156698  |
|  | ENSRORG0000011226  | TTBK2           | tau tubulin kinase 2 [Source:HGNC Symbol;Acc:HGNC:19141]                                                                      | 16.37637861 | 14.09223932  | 0.698251537  | 2.982858561  |
|  | ENSRORG00000005247 | nmt1b           | N-myristoyltransferase 1b [Source:ZFIN;Acc:ZDB-Gene-061122-201]                                                               | 4.260409971 | -0.122546815 | -2.270166604 | 2.113351896  |
|  | ENSRORG00000006656 | ngnt1           | nestrobinectin [Source:ZFIN;Acc:ZDB-Gene-090312-2001]                                                                         | 3.365264536 | 1.448374797  | -2.259011306 | -0.34169717  |
|  | ENSRORG0000015412  | -               | -                                                                                                                             | 3.254979494 | -0.075189972 | -2.065088859 | 1.26556594   |
|  | ENSRORG0000011411  | slc26a1         | solute carrier family 26 (anion exchanger), member 1 [Source:ZFIN;Acc:ZDB-Gene-070112-2182]                                   | 4.682089436 | 0.7656165    | -2.561882716 | 1.076591561  |
|  | ENSRORG00000007737 | -               | -                                                                                                                             | 3.12079547  | 0.596150677  | -1.502306663 | 1.022823122  |
|  | ENSRORG0000000895  | -               | -                                                                                                                             | 16.0118399  | 13.68818529  | -1.795017504 | 0.519061986  |
|  | ENSRORG0000001079  | -               | -                                                                                                                             | 7.015331894 | 2.36316857   | -3.115768993 | 1.536875628  |
|  | ENSRORG00000001520 | erbb3a          | erb-B2 receptor tyrosine kinase 3a [Source:ZFIN;Acc:ZDB-Gene-030916-3]                                                        | 5.203631574 | -0.760314367 | -2.097944667 | 3.866481324  |
|  | ENSRORG00000003060 | -               | -                                                                                                                             | 3.880971088 | 3.331284728  | 0.542051489  | 1.02222929   |
|  | ENSRORG00000101400 | dkk1a           | Dickkopf-related protein 1 [Source:NCBI gene;Acc:101172518]                                                                   | 18.77613667 | 12.92917332  | -8.054981061 | -2.207551292 |
|  | ENSRORG00000006345 | dkk1a           | Dickkopf-related protein 1 [Source:NCBI gene;Acc:101172518]                                                                   | 5.61781803  | 2.416988049  | -1.222940415 | 1.978378321  |
|  | ENSRORG00000002352 | si.ch1073-27b9  | ninurin 1 [Source:HGNC Symbol;Acc:HGNC:7824]                                                                                  | 5.052299924 | 2.229800006  | -2.229800006 | 0.697017078  |
|  | ENSRORG0000011579  | slc2a2          | solute carrier family 2 (facilitated glucose transporter), member 2 [Source:ZFIN;Acc:ZDB-Gene-030131-1213]                    | 6.215573509 | -9.965510147 | -16.18109304 | 0            |
|  | ENSRORG0000016244  | paqr6           | progestin and androgen receptor family member VI [Source:ZFIN;Acc:ZDB-Gene-090714-1]                                          | 3.690187879 | 0.70946628   | -0.769741331 | 2.211456149  |
|  | ENSRORG0000015348  | tsf3mp1         | tumor protein p53 inducible nuclear protein 1 [Source:ZFIN;Acc:ZDB-Gene-031018-3]                                             | 3.188448583 | 0.619156072  | -1.304679924 | 1.265097264  |

|  |                    |          |                                                                                |   |   |              |             |
|--|--------------------|----------|--------------------------------------------------------------------------------|---|---|--------------|-------------|
|  | ENSRORG00000006121 | HIP1R    | huntingtin interacting protein 1 related [Source:HGNC Symbol;Acc:HGNC:18415]   | - | - | -2.735311028 | 0.343604286 |
|  | ENSRORG00000006179 | -        | -                                                                              | - | - | -13.7246897  | 2.064738777 |
|  | ENSRORG00000004896 | trim36   | tripartite motif containing 36 [Source:ZFIN;Acc:ZDB-Gene-040426-208]           | - | - | -2.535936276 | 0.064969197 |
|  | ENSRORG00000013281 | frscl1   | Fibronectin type III domain containing 1 [Source:ZFIN;Acc:ZDB-Gene-041210-332] | - | - | -2.646306918 | 1.156933068 |
|  | ENSRORG00000003884 | sparrn   | sparrn A [Source:ZFIN;Acc:ZDB-Gene-080204-37]                                  | - | - | -2.808609497 | 0.139436253 |
|  | ENSRORG0000001421  | had17b12 |                                                                                |   |   |              |             |

|  |                      |                      |                                                                                                                |             |              |              |              |
|--|----------------------|----------------------|----------------------------------------------------------------------------------------------------------------|-------------|--------------|--------------|--------------|
|  | ENSORLG0000006570    | znf503               | zinc finger protein 503 [Source:NCBI gene:Acc:101174213]                                                       | 5.87054366  | 1.786424017  | -2.55587031  | 1.528735162  |
|  | ENSORLG0000000212    | -                    | scdram/cosasum transporting ATPase subunit alpha-1 [Source:NCBI gene:Acc:100049455]                            | 5.249745539 | -0.008755089 | -3.097511346 | 2.161494126  |
|  | ENSORLG00000003108   | paplnb               | papilin b, proteoglycan-like sulfated glycoprotein [Source:ZFIN:Gene:ZDB-GENE-030131-6023]                     | 16.52344237 | 12.52889115  | -6.265991041 | -2.631569238 |
|  | ENSORLG00000006392   | -                    | -                                                                                                              | 4.832596557 | 1.051136717  | -2.634716364 | 1.147167457  |
|  | ENSORLG00000001661   | -                    | -                                                                                                              | 4.886551903 | 0.454371224  | -1.882984151 | 2.549701016  |
|  | ENSORLG00000003715   | fbx14b               | F-box and leucine-rich repeat protein 14b [Source:ZFIN:Acc:ZDB-GENE-030131-3556]                               | 3.226175201 | 1.419173621  | 0.102454989  | 1.911941311  |
|  | ENSORLG000000001758  | s1rkey-11c3          | uncharacterized LOC101167627 [Source:NCBI gene:Acc:101167627]                                                  | 16.75467602 | 11.36132923  | -3.371944118 | 2.021872009  |
|  | ENSORLG000000017962  | pdtk1                | PDZ domain containing 1 [Source:NCBI gene:Acc:101175521]                                                       | 5.985818843 | -1.014378455 | -4.385094926 | 2.615569595  |
|  | ENSORLG00000002989   | scg3                 | secretogranin III [Source:ZFIN:Acc:ZDB-GENE-040426-1725]                                                       | 3.329015947 | 0.385760769  | -1.080782604 | 1.862958329  |
|  | ENSORLG000000008481  | prsf60.2             | serine protease 60.2 [Source:ZFIN:Acc:ZDB-GENE-050201-109]                                                     | 4.10017553  | 0.827649303  | -2.386022175 | 0.90494373   |
|  | ENSORLG000000011193  | fbn7                 | fibulin 7 [Source:ZFIN:Acc:ZDB-GENE-170130-2]                                                                  | 4.684619064 | 0.00618396   | -1.681557079 | 2.997360838  |
|  | ENSORLG000000016858  | htbs3a               | thrombospondin 3a [Source:ZFIN:Acc:ZDB-GENE-020708-3]                                                          | 3.543559857 | 2.430618496  | -1.173346305 | -0.059919766 |
|  | ENSORLG00000007129   | swap70a              | switching 3 cell complex subunit SWAP70a [Source:ZFIN:Acc:ZDB-GENE-040426-1182]                                | 4.009748177 | 2.097141343  | -2.74690044  | -0.833808948 |
|  | ENSORLG00000007363   | mfl9b                | ring finger protein 19b [Source:ZFIN:Acc:ZDB-GENE-060503-291]                                                  | 3.220240165 | 1.560262518  | -1.256409973 | 0.404052383  |
|  | ENSORLG000000004996  | sov11a               | SRY (sex determining region Y)-box 11a [Source:ZFIN:Acc:ZDB-GENE-980526-396]                                   | 4.267046076 | 1.090761714  | -0.743943925 | 2.42819192   |
|  | ENSORLG000000003132  | -                    | -                                                                                                              | 3.524435701 | 1.648302843  | -1.375448285 | 0.501117137  |
|  | ENSORLG000000014858  | oxmb                 | oxalitin b [Source:ZFIN:Acc:ZDB-GENE-130630-697]                                                               | 3.871963499 | 1.737979551  | -0.122245409 | 2.012406433  |
|  | ENSORLG000000015876  | flrt2                | fibronectin leucine rich transmembrane protein 2 [Source:ZFIN:Acc:ZDB-GENE-070705-267]                         | 3.988444232 | 1.880903172  | -0.809493698 | 1.298531268  |
|  | ENSORLG000000016561  | lert4                | keratin 4 [Source:ZFIN:Acc:ZDB-GENE-000607-83]                                                                 | 5.35402952  | 0.3174975    | -2.456126917 | 2.580899722  |
|  | ENSORLG000000017856  | myom1a               | myomesin 1a (katerin) [Source:ZFIN:Acc:ZDB-GENE-030131-2856]                                                   | 3.859318196 | 1.354485253  | -0.421154336 | 2.084161267  |
|  | ENSORLG00000002528   | alh3a2b              | aldehyde dehydrogenase 3 family member A2b [Source:ZFIN:Acc:ZDB-GENE-040912-103]                               | 4.914338459 | 1.26383919   | -1.309857702 | 2.341131881  |
|  | ENSORLG000000016046  | cock3b               | coiled-coil domain-containing protein 3 [Source:NCBI gene:Acc:101181051]                                       | 4.079724625 | 1.063263111  | -2.241251    | 0.775690031  |
|  | ENSORLG000000002699  | kirrel1b             | kirie like nephrin family adhesion molecule 1b [Source:ZFIN:Acc:ZDB-GENE-070912-173]                           | 5.9340132   | 3.262722839  | -2.274356495 | 0.397419003  |
|  | ENSORLG000000015665  | tp63                 | tumor protein p63 [Source:ZFIN:Acc:ZDB-GENE-030913-1]                                                          | 5.57250455  | 0.46419127   | -3.092094245 | 2.001507685  |
|  | ENSORLG000000015772  | agp12                | aquaporin 12 [Source:ZFIN:Acc:ZDB-GENE-040718-310]                                                             | 3.733128124 | 1.46806992   | -2.707782521 | -0.44223912  |
|  | ENSORLG000000005381  | lrp2b                | low-density lipoprotein receptor-related protein 2 [Source:NCBI gene:Acc:101185597]                            | 4.934046992 | -0.382869831 | -2.981586165 | 2.338815437  |
|  | ENSORLG0000000013828 | s1rkey-25d11-25d11.7 | s1rkey-25d11.7 [Source:ZFIN:Acc:ZDB-GENE-141216-296]                                                           | 4.300760675 | 0.571681339  | -0.945786139 | 2.78780579   |
|  | ENSORLG000000012779  | -                    | -                                                                                                              | 4.232118935 | 2.00989005   | -1.311339111 | 0.92027568   |
|  | ENSORLG000000013986  | ajapb                | ajapolipoprotein Eb [Source:NCBI gene:Acc:101161673]                                                           | 4.783773504 | 2.106277451  | -1.42262949  | 1.253351915  |
|  | ENSORLG000000016619  | my9a                 | myosin light chain 9a, regulatory [Source:ZFIN:Acc:ZDB-GENE-041010-130]                                        | 3.548947692 | 1.54621195   | -0.579041653 | 1.424175084  |
|  | ENSORLG000000003615  | s1rkey-85k7.10       | s1rkey-85k7.10 [Source:ZFIN:Acc:ZDB-GENE-160728-49]                                                            | 15.87965312 | 12.80059054  | -4.244882210 | -1.165354689 |
|  | ENSORLG000000012464  | tgml1                | transglutaminase 1 like 1 [Source:ZFIN:Acc:ZDB-GENE-060503-139]                                                | 3.567064122 | 2.230971263  | -1.78622701  | -0.455944114 |
|  | ENSORLG000000008514  | cd8a                 | uncharacterized LOC100125537 [Source:NCBI gene:Acc:100125537]                                                  | 17.03037024 | 12.08947696  | -2.275388342 | 2.665973237  |
|  | ENSORLG000000003278  | -                    | LHP1, tetraspan subfamily member 2 protein [Source:NCBI gene:Acc:101158202]                                    | 5.45569985  | 2.207231923  | -0.323498957 | 2.925373317  |
|  | ENSORLG000000017422  | shank3b              | SH3 and multiple ankyrin repeat domains 3b [Source:ZFIN:Acc:ZDB-GENE-041010-74]                                | 4.186868643 | 2.08834724   | -0.120868672 | 1.085709994  |
|  | ENSORLG000000013864  | cytda                | CYTD (yne D) deubiquitinase [Source:NCBI gene:Acc:101156964]                                                   | 6.77182471  | 0.953688042  | -2.935350582 | 2.824911832  |
|  | ENSORLG000000017998  | mtbp (1 of ma)       | muscle-specific beta 1 integrin binding protein [Source:ZFIN:Acc:ZDB-GENE-030404-1]                            | 5.661279958 | 0.059613436  | -4.441423283 | 1.16071917   |
|  | ENSORLG000000008542  | -                    | -                                                                                                              | 4.059147682 | 2.170272775  | -0.469974542 | 1.419446558  |
|  | ENSORLG000000013491  | smo2                 | SPARC related modular calcium binding 2 [Source:ZFIN:Acc:ZDB-GENE-021031-5]                                    | 4.329192162 | 1.232262448  | -3.040211091 | 0.057199811  |
|  | ENSORLG000000016141  | -                    | uncharacterized LOC101171775 [Source:NCBI gene:Acc:101171775]                                                  | 5.551453163 | 0.3136944    | -2.500347349 | 2.737896572  |
|  | ENSORLG000000004545  | PLEKH45              | pleckstrin homology domain containing A5 [Source:HGNC Symbol:Acc:HGNC:30036]                                   | 3.737729797 | 1.217776506  | -0.909520933 | 1.610916684  |
|  | ENSORLG000000005422  | pik3cd               | phosphatidylinositol-4,5-bisphosphate 3-kinase, catalytic subunit delta [Source:ZFIN:Acc:ZDB-GENE-040426-1128] | 3.516970528 | 2.311197861  | -0.959902049 | 0.246354188  |
|  | ENSORLG000000007824  | notum1a              | notum, palmitoleyl-protein carboxylesterase a [Source:ZFIN:Acc:ZDB-GENE-120807-2]                              | 5.617322588 | 3.250924589  | -0.235742017 | 2.131143981  |
|  | ENSORLG000000010967  | hand2                | heart and neural crest derivatives expressed 2 [Source:ZFIN:Acc:ZDB-GENE-000511-1]                             | 16.62005053 | 12.47212979  | -1.735048934 | 2.413338151  |
|  | ENSORLG000000010305  | lystr1               | lysine 3-hydroxy-3-methylglutaryl-CoA reductase [Source:HGNC Symbol:Acc:HGNC:5006]                             | 3.741861125 | -0.546116317 | -3.842709239 | 0.445751715  |
|  | ENSORLG000000017313  | HWGR (1 of m)        | cysteinyl histidine receptor 1 [Source:ZFIN:Acc:ZDB-GENE-050522-250]                                           | 3.478191599 | 0.491379216  | -1.82875541  | 1.158541807  |
|  | ENSORLG000000009916  | leap2                | liver-expressed antimicrobial peptide 2 [Source:ZFIN:Acc:ZDB-GENE-081022-131]                                  | 5.939739739 | 1.273353382  | -5.806520648 | -1.139648934 |
|  | ENSORLG000000015700  | CAMSPA2 (1 of c)     | calmodulin regulated spectrin associated protein family member 2 [Source:HGNC Symbol:Acc:HGNC:29188]           | 3.905727571 | 2.451571624  | -0.971605886 | 0.483034375  |
|  | ENSORLG000000013508  | ETS1                 | ETS proto-oncogene 1, transcription factor [Source:HGNC Symbol:Acc:HGNC:5498]                                  | 3.744772844 | 1.731078457  | -1.110110599 | 0.890968933  |
|  | ENSORLG000000009885  | she                  | Src homology 2 domain containing E [Source:ZFIN:Acc:ZDB-GENE-090915-6]                                         | 4.452180129 | 1.880246834  | -0.738544226 | 1.83387733   |
|  | ENSORLG000000014923  | -                    | -                                                                                                              | 3.486734623 | 1.443230624  | 0.003956362  | 2.047944631  |
|  | ENSORLG000000002085  | cdkn1db              | cyclin dependent kinase inhibitor 1C [Source:NCBI gene:Acc:101173627]                                          | 5.544733363 | 1.814162592  | -1.818631996 | 1.912423973  |
|  | ENSORLG000000001428  | trmem35              | transmembrane protein 35A [Source:NCBI gene:Acc:101185318]                                                     | 4.411773879 | 3.180310939  | 1.350868509  | 2.582815819  |
|  | ENSORLG000000000058  | -                    | -                                                                                                              | 5.128349326 | 1.855400034  | -2.216465498 | 1.05698076   |
|  | ENSORLG000000006005  | -                    | -                                                                                                              | 4.091124102 | 2.588799698  | -1.638670512 | -0.13860677  |
|  | ENSORLG000000003591  | col5a1               | procollagen, type V, alpha 1 [Source:ZFIN:Acc:ZDB-GENE-041105-6]                                               | 4.51664439  | 1.922910016  | -3.17008089  | -0.575861785 |
|  | ENSORLG000000011024  | endouc               | poly(U)-specific endoribonuclease-C [Source:NCBI gene:Acc:101164801]                                           | 3.965746172 | 1.8601716    | -1.803901088 | 0.302152307  |
|  | ENSORLG000000013159  | otoc                 | otocystin [Source:ZFIN:Acc:ZDB-GENE-120601-1]                                                                  | 4.311805563 | -2.218182408 | -2.399431419 | 4.221038544  |
|  | ENSORLG000000003453  | inka1b               | family with sequence similarity 212, member Ab [Source:ZFIN:Acc:ZDB-GENE-030131-5538]                          | 3.922400857 | 0.352327789  | -1.197218108 | 2.373344885  |
|  | ENSORLG000000013484  | sesn1                | sesn1 [Source:ZFIN:Acc:ZDB-GENE-040718-408]                                                                    | 4.07986668  | 1.321891568  | -2.743702987 | 0.005878995  |
|  | ENSORLG00000001438   | zpc-101640           | zpc-101640 [Source:ZFIN:Acc:ZDB-GENE-041114-158]                                                               | 3.370897679 | 2.007421373  | -0.202679376 | 1.161281898  |
|  | ENSORLG000000006161  | s1rkey-153b          | s1rkey-153b23.3 [Source:ZFIN:Acc:ZDB-GENE-141216-408]                                                          | 3.380713063 | 0.89523185   | -1.083256185 | 1.412706648  |
|  | ENSORLG000000000288  | SUSD2                | sushi domain containing 2 [Source:HGNC Symbol:Acc:HGNC:30667]                                                  | 3.132409212 | -0.286723955 | -2.935615846 | 0.48400277   |
|  | ENSORLG000000010756  | cyr61                | cysteine rich angiogenic inducer 61 [Source:NCBI gene:Acc:101157527]                                           | 4.42775443  | 2.262191598  | -1.395616115 | 0.770431353  |
|  | ENSORLG000000005034  | -                    | -                                                                                                              | 4.665391044 | -0.004595584 | -2.440088986 | 2.230387653  |
|  | ENSORLG000000010786  | -                    | -                                                                                                              | 4.63115784  | 1.607496873  | -0.153612915 | 2.870531598  |

|  |                     |         |                                                                                                |              |              |              |              |
|--|---------------------|---------|------------------------------------------------------------------------------------------------|--------------|--------------|--------------|--------------|
|  | ENSORLG00000017389  | atpr    | protein tyrosine phosphatase, receptor type, r [Source:ZFIN:Acc:ZDB-GENE-101029-2]             | -1.935547812 | 0.359776844  | -0.899138881 | -3.193878315 |
|  | ENSORLG000000004187 | -       | -                                                                                              | 2.364372005  | 6.710977083  | -8.446034603 | -9.192147038 |
|  | ENSORLG000000010652 | pkir    | pyruvate kinase LR [Source:ZFIN:Acc:ZDB-GENE-010907-1]                                         | -2.256001185 | -0.890872401 | -2.93779855  | 4.302522443  |
|  | ENSORLG000000005715 | olfrp6  | extracellular calcium-sensing receptor-like [Source:NCBI gene:Acc:101174763]                   | -10.72021005 | 5.261451258  | 0            | 15.981666828 |
|  | ENSORLG00000007527  | h2afk   | histone H2AFK [Source:NCBI gene:Acc:101160298]                                                 | -2.692616242 | 0.128056926  | -0.427688648 | -3.24781375  |
|  | ENSORLG000000004161 | -       | cytochrome C-binding protein CCO10 homolog, mitochondrial [Source:NCBI gene:Acc:101164311]     | 2.927120005  | 5.038389836  | -1.584207666 | -3.680218489 |
|  | ENSORLG000000002339 | slc1a8a | solute carrier family 1 (glutamate transporter), member 8a [Source:ZFIN:Acc:ZDB-GENE-101111-8] | -4.311127212 | 1.232718956  | -10.90918806 | -16.45304909 |
|  | ENSORLG000000018254 | myo1b   | myosin IIb [Source:ZFIN:Acc:ZDB-GENE-030131-695]                                               | -2.524037155 | -0.430114981 | -2.553562568 | -4.646999808 |
|  | ENSORLG000000015035 | atp8b1  | ATPase phospholipid transporting 8b1 [Source:ZFIN:Acc:ZDB-GENE-091116-14]                      | -1.281819134 | 0.612042139  | -1.535126945 | -3.428503271 |
|  | ENSORLG000000011040 | -       | -                                                                                              | -13.8786583  | 4.523870262  | 15.25486454  | -3.156340989 |
|  | ENSORLG000000004834 | -       | -                                                                                              | -1.713264261 | 0.173699249  | -1.27464589  | -3.161124705 |
|  | ENSORLG000000017339 | -       | -                                                                                              | -0.948739858 | 0.130384993  | -2.598959583 | -3.677599408 |
|  | ENSORLG000000003946 | -       | -                                                                                              | -2.950348008 | 0.785451297  | 0.652119356  | -3.08319489  |
|  | ENSORLG000000013914 | TRIM16L | tripartite motif containing 16 like [Source:HGNC Symbol:Acc:HGNC:32870]                        | -2.115146643 | -0.570719382 | -2.277917144 | -3.821859566 |

|                     |                |                                                                                                                  |             |              |               |              |
|---------------------|----------------|------------------------------------------------------------------------------------------------------------------|-------------|--------------|---------------|--------------|
| ENSRLOG0000009694   | plcd1a         | 1-phosphatidylinositol 4,5-bisphosphate phosphohydrolase delta-1 [Source:NCBI gene:Acc:101187907]                | 3.43916398  | 1.009265052  | -0.576947422  | 1.853436852  |
| ENSRLOG0000001361   | aff4           | AF4/FMR2 family, member 4 [Source:ZFIN:Acc:ZDB-GENE-100910-5]                                                    | 3.304670106 | 0.358121226  | -1.535455502  | 1.411578151  |
| ENSRLOG0000007407   | -              | -                                                                                                                | 4.759943724 | 0.786314635  | -3.059712434  | 0.914402192  |
| ENSRLOG00000007839  | 113a1b         | coagulation factor XIII, A1 polypeptide b [Source:ZFIN:Acc:ZDB-GENE-030131-9634]                                 | 3.267768531 | 2.436857568  | -1.181395231  | -0.349999308 |
| ENSRLOG00000006917  | si.ch211-191d  | si.ch211-191d15.2 [Source:ZFIN:Acc:ZDB-GENE-040724-119]                                                          | 3.193524014 | 1.610834611  | -1.066659863  | 0.516514916  |
| ENSRLOG00000013034  | mycn           | MYCN proto-oncogene, bHLH transcription factor [Source:ZFIN:Acc:ZDB-GENE-020711-11]                              | 4.447896487 | 1.868890185  | -1.761672787  | 0.817618907  |
| ENSRLOG0000004534   | da2            | chymotrypsin-like elastase family member 2A [Source:NCBI gene:Acc:101168538]                                     | 7.624791755 | 1.916194931  | -6.019553209  | -0.31047131  |
| ENSRLOG0000001261   | sash3          | SAM and SH3 domain containing 3 [Source:ZFIN:Acc:ZDB-GENE-120411-11]                                             | 4.114263436 | 2.244308615  | -1.629684362  | 0.2407555    |
| ENSRLOG0000001384   | si.ch73-28112  | si.ch73-28112.4 [Source:ZFIN:Acc:ZDB-GENE-130530-882]                                                            | 3.087120788 | 1.354043236  | 0.689733395   | 2.423299598  |
| ENSRLOG00000008732  | nr4a3          | nuclear receptor subfamily 4 group A member 3 [Source:NCBI gene:Acc:101167731]                                   | 6.33471603  | 2.207613759  | -2.078178718  | 2.049413047  |
| ENSRLOG00000017648  | dhmt3aa        | DNA (cytosine-5-)-methyltransferase 3 alpha a [Source:ZFIN:Acc:ZDB-GENE-050314-5]                                | 4.664060599 | 1.468538813  | -1.884960654  | 1.311046307  |
| ENSRLOG00000011636  | -              | -                                                                                                                | 3.092706294 | 0.53777853   | -1.59392937   | 0.96148888   |
| ENSRLOG00000017492  | sp9            | Sp9 transcription factor [Source:NCBI gene:Acc:101162490]                                                        | 5.492717214 | -0.137475663 | -3.0498747    | 2.581702422  |
| ENSRLOG0000001322   | -              | -                                                                                                                | 4.578042768 | 1.445718514  | -0.7249729304 | 2.88308728   |
| ENSRLOG00000014341  | -              | -                                                                                                                | 4.292731708 | 1.793373361  | -1.467397973  | 1.032446064  |
| ENSRLOG00000002677  | rac3b          | Rac family small GTPase 3b [Source:ZFIN:Acc:ZDB-GENE-080270-21]                                                  | 3.13520356  | 2.191301121  | -1.750543217  | -0.806155051 |
| ENSRLOG00000015125  | -              | -                                                                                                                | 5.608513124 | 0.638457698  | -2.548949424  | 2.463915666  |
| ENSRLOG00000007584  | -              | -                                                                                                                | 3.862724723 | 1.013253856  | -2.522434378  | 0.327530773  |
| ENSRLOG00000005033  | slc34a1a       | solute carrier family 34 (type II sodium/phosphate cotransporter), member 1A [Source:ZFIN:Acc:ZDB-GENE-101006-3] | 6.094690897 | 0.354679694  | -6.933252838  | -1.192757079 |
| ENSRLOG00000011559  | pcdh1b         | protocadherin 1b [Source:ZFIN:Acc:ZDB-GENE-091015-2]                                                             | 4.947034522 | 1.858827086  | -0.998663291  | 2.091829778  |
| ENSRLOG00000009705  | -              | -                                                                                                                | 3.100681921 | 1.543365936  | -1.98176534   | -0.380376369 |
| ENSRLOG00000017543  | -              | -                                                                                                                | 6.032096323 | 3.726543399  | -0.418071292  | 1.887308262  |
| ENSRLOG0000001340   | -              | -                                                                                                                | 4.893233361 | 1.891708476  | -4.770835321  | -1.630635331 |
| ENSRLOG00000004586  | ela2l          | chymotrypsin-like elastase family member 2A [Source:NCBI gene:Acc:101168781]                                     | 7.410065549 | 2.399678539  | -5.846825611  | -0.83595371  |
| ENSRLOG00000007107  | chd3           | chromatin domain helicase DNA binding protein 3 [Source:ZFIN:Acc:ZDB-GENE-121031-4]                              | 4.911365796 | 1.786376887  | -0.916319706  | 2.209155984  |
| ENSRLOG00000016940  | ihf5           | inter-alpha-trypsin inhibitor heavy chain family, member 5 [Source:ZFIN:Acc:ZDB-GENE-041213-193]                 | 3.116657252 | 2.559702795  | -2.00915073   | -1.451736721 |
| ENSRLOG00000001392  | ker8           | keratin, type II cytoskeletal 8 [Source:NCBI gene:Acc:101168366]                                                 | 3.939186801 | 1.344866294  | -1.560414072  | 1.034391424  |
| ENSRLOG00000017048  | hoxb3a         | homeobox B3a [Source:ZFIN:Acc:ZDB-GENE-990415-104]                                                               | 6.115466673 | 0.753846706  | -3.438852147  | 1.923252633  |
| ENSRLOG00000002980  | gmt            | phosphoethanolamine methyltransferase [Source:ZFIN:Acc:ZDB-GENE-060929-740]                                      | 5.357600252 | 0.855899793  | -2.503543326  | 1.99640198   |
| ENSRLOG00000000636  | notch1b        | notch 1b [Source:ZFIN:Acc:ZDB-GENE-990415-183]                                                                   | 4.086384164 | 1.052638663  | -0.53959988   | 2.394378474  |
| ENSRLOG00000005670  | tubb1          | tubulin, beta 1 class VI [Source:ZFIN:Acc:ZDB-GENE-110408-5]                                                     | 18.60065849 | 0            | -1.472452009  | 15.1289801   |
| ENSRLOG00000009959  | -              | -                                                                                                                | 3.725757427 | 2.873040663  | 0.084744482   | 0.887449178  |
| ENSRLOG00000000240  | -              | -                                                                                                                | 7.184858465 | -11.77195159 | -5.398888721  | 13.56145025  |
| ENSRLOG00000000217  | -              | -                                                                                                                | 6.611909876 | -0.163353531 | -3.549366187  | 3.226381005  |
| ENSRLOG00000009888  | hapln1a        | hyaluronan and proteoglycan link protein 1a [Source:ZFIN:Acc:ZDB-GENE-050302-175]                                | 3.830939162 | 2.037300297  | -0.637299902  | 1.156824069  |
| ENSRLOG00000000321  | lgr11b         | fibroblast growth factor receptor 1b [Source:ZFIN:Acc:ZDB-GENE-060510-14]                                        | 3.784000326 | 1.173848403  | -1.777117377  | 0.293519203  |
| ENSRLOG00000017377  | fox3           | forkhead box O3 [Source:NCBI gene:Acc:100301615]                                                                 | 5.41838635  | 2.4532552    | -1.437535303  | 1.521537326  |
| ENSRLOG00000004154  | notch2         | notch 2 [Source:ZFIN:Acc:ZDB-GENE-000279-4]                                                                      | 3.032382767 | 0.903883841  | -1.070743496  | 1.060250335  |
| ENSRLOG00000012685  | si.dkey-19218  | si.dkey-19218.9 [Source:ZFIN:Acc:ZDB-GENE-120709-25]                                                             | 4.010891604 | 2.045130566  | -0.809740086  | 1.156506178  |
| ENSRLOG00000016594  | TSPAN9         | terraspanin-9 [Source:NCBI gene:Acc:101168895]                                                                   | 3.58667391  | 1.784053068  | -0.982078216  | 0.841027350  |
| ENSRLOG00000013238  | -              | -                                                                                                                | 5.152248264 | 0.948893451  | -2.272837219  | 1.931037061  |
| ENSRLOG00000014641  | RELN           | reelin [Source:NCBI gene:Acc:100049232]                                                                          | 4.38866463  | 2.5364791    | -1.133414024  | 0.69938353   |
| ENSRLOG00000008292  | pnp5a          | purine nucleoside phosphorylase 5a [Source:ZFIN:Acc:ZDB-GENE-040476-2553]                                        | 4.895100153 | 1.938674351  | -2.230945724  | 0.725965396  |
| ENSRLOG00000017242  | -              | -                                                                                                                | 18.03861404 | 11.27488188  | -2.12931888   | 6.691768219  |
| ENSRLOG00000003389  | itgb3a         | integrin beta 3a [Source:ZFIN:Acc:ZDB-GENE-071207-1]                                                             | 4.418097853 | 0.748466748  | -2.155256556  | 1.545593076  |
| ENSRLOG000000015138 | lrrc32         | leucine rich repeat containing 32 [Source:ZFIN:Acc:ZDB-GENE-090630-11]                                           | 3.270039768 | 1.094496372  | -1.15092006   | 1.02510844   |
| ENSRLOG00000012662  | ker94          | keratin, type I cytoskeletal 13 [Source:NCBI gene:Acc:101160141]                                                 | 4.384269735 | 1.474124632  | -2.698989209  | 0.211640987  |
| ENSRLOG00000005486  | lbox           | tobdy sox homolog (Drosophila) [Source:ZFIN:Acc:ZDB-GENE-091014-306]                                             | 4.093161234 | 1.398210198  | 0.078224887   | 2.773669373  |
| ENSRLOG000000015641 | dfc6c          | differentially expressed in FDCP 6c homolog [Source:ZFIN:Acc:ZDB-GENE-060503-87]                                 | 4.91413801  | 0.795638273  | -1.435035376  | 2.689351072  |
| ENSRLOG00000004222  | fstl3          | follicularin-like 3 (secreted glycoprotein) [Source:ZFIN:Acc:ZDB-GENE-050913-111]                                | 3.544933558 | -0.597288362 | -4.403607057  | -0.260900531 |
| ENSRLOG00000003013  | lpar6a         | lysophosphatidic acid receptor 6a [Source:ZFIN:Acc:ZDB-GENE-061013-343]                                          | 4.325091195 | 2.093900011  | -1.561613022  | 0.670063323  |
| ENSRLOG00000003048  | mala           | myelin and lymphocyte protein [Source:NCBI gene:Acc:101170152]                                                   | 17.55624199 | 12.91785874  | -2.782158993  | 1.856691515  |
| ENSRLOG00000007410  | -              | -                                                                                                                | 5.705179669 | 1.90953445   | -2.27852644   | 1.517605129  |
| ENSRLOG00000004980  | adams1         | ADAM metalloproteinase with thrombospondin type 1 motif 1 [Source:ZFIN:Acc:ZDB-GENE-070814-1]                    | 4.712591344 | 1.523823493  | -2.12084447   | 1.068044496  |
| ENSRLOG00000014372  | cdk42ep1b      | CDK42 effector protein (Rho GTPase binding) 1b [Source:ZFIN:Acc:ZDB-GENE-120215-219]                             | 3.294153131 | 1.231307093  | -0.991239828  | 1.072090404  |
| ENSRLOG00000015357  | smug1          | single-strand-selective monofunctional uracil-DNA glycosylase 1 [Source:ZFIN:Acc:ZDB-GENE-030131-9473]           | 3.473553394 | 1.39096626   | -1.62761347   | 0.455460101  |
| ENSRLOG00000010032  | cpb1           | carboxypeptidase B1 [Source:NCBI gene:Acc:101169819]                                                             | 7.051475306 | 0.995571272  | -6.77844683   | -0.711455828 |
| ENSRLOG00000006540  | si.ch211-16312 | si.ch211-16312.8 [Source:ZFIN:Acc:ZDB-GENE-041008-93]                                                            | 6.999924577 | 3.996310291  | -0.533663353  | 3.070418329  |
| ENSRLOG00000005820  | -              | -                                                                                                                | 3.695861017 | 2.035138074  | -1.105215126  | 0.555988588  |
| ENSRLOG00000001650  | cytb           | cytochrome b-245, beta polypeptide (chronic granulomatous disease) [Source:ZFIN:Acc:ZDB-GENE-040426-1380]        | 5.425295653 | 2.704668975  | -2.87613327   | -0.155023479 |
| ENSRLOG000000015444 | tpka           | inositol-trisphosphate 3-kinase A [Source:ZFIN:Acc:ZDB-GENE-030616-116]                                          | 5.322046843 | 1.174141102  | -2.341278298  | 1.80711249   |
| ENSRLOG000000013386 | tm6d6          | transmembrane 624 trafficking protein 6 [Source:ZFIN:Acc:ZDB-GENE-131121-182]                                    | 6.210161904 | 3.275843885  | -3.408458423  | -0.473655099 |
| ENSRLOG00000016361  | -              | -                                                                                                                | 4.345203184 | 1.221825402  | -1.262134096  | 1.861728761  |
| ENSRLOG00000008679  | H3hc           | histone H3.3 [Source:NCBI gene:Acc:101163693]                                                                    | 3.42071398  | 1.192791403  | -0.38166411   | 1.852100775  |
| ENSRLOG00000002782  | TCG (1 of mar) | ubiquitin [Source:HGN:Symbol:Acc:HGN:4191]                                                                       | 4.981694855 | 0.175942172  | -2.425039203  | -2.3569981   |
| ENSRLOG00000000958  | -              | -                                                                                                                | 5.238256377 | 2.560401769  | -2.822605885  | -0.144268806 |
| ENSRLOG00000011131  | pnip2b         | peripherin myelin protein 22 [Source:NCBI gene:Acc:101160768]                                                    | 4.261914037 | 1.856317485  | -0.675601869  | 1.730479303  |
| ENSRLOG00000006611  | NACC2          | NACC family member 2 [Source:HGN:Symbol:Acc:HGN:23846]                                                           | 5.894161038 | 1.049393503  | -2.707159758  | 2.138092476  |

|  |                     |                |                                                                                                            |             |              |              |              |
|--|---------------------|----------------|------------------------------------------------------------------------------------------------------------|-------------|--------------|--------------|--------------|
|  | ENSORLG00000010663  | ela3l          | chymotrypsin-like elastase family member 2A<br>[Source:NCBI gene:Acc:101165737]                            | 10.01339013 | 3.57369657   | -17.58454599 | -11.14479206 |
|  | ENSORLG00000009239  | acsbq2         | acyl-CoA synthetase butyryl-CoA family member 2<br>[Source:ZFIN,Acc:ZDB-GENE-030131-7099]                  | 3.026229322 | 1.229299857  | -0.863812008 | 0.93360245   |
|  | ENSORLG00000001258  | rab25a         | RAB25, member RAS oncogene family a<br>[Source:ZFIN,Acc:ZDB-GENE-042127-69]                                | 5.827123876 | -0.257157534 | -3.140282519 | 2.944483738  |
|  | ENSORLG000000018034 | col4a2         | collagen, type IV, alpha 2 [Source:ZFIN,Acc:ZDB-GENE-070725-3]                                             | 4.209608519 | 1.619743844  | -0.966533113 | 1.623816686  |
|  | ENSORLG00000001038  |                |                                                                                                            | 3.062431047 | 1.69548537   | -1.611306087 | -0.243020617 |
|  | ENSORLG00000007725  | Ihm3           | inomin-like 3 [Source:ZFIN,Acc:ZDB-GENE-030131-1]                                                          | 4.252969742 | 1.932164095  | -0.118605957 | 2.206885048  |
|  | ENSORLG000000017893 | -              | -                                                                                                          | 7.298083566 | -11.10417938 | -4.57183783  | 13.83083009  |
|  | ENSORLG000000015894 |                |                                                                                                            | 3.064911319 | 1.958136991  | 0.712148069  | 1.81940121   |
|  | ENSORLG000000011125 | lapk3a         | LAP kinase 3a [Source:ZFIN,Acc:ZDB-GENE-100921-50]                                                         | 2.929665571 | 0.15671113   | -7.544407298 | 0.559110984  |
|  | ENSORLG000000010212 | -              | -                                                                                                          | 3.423672473 | 2.305031117  | 0.377526525  | 1.496653501  |
|  | ENSORLG000000009360 | cyba           | cytochrome b-245 light chain [Source:NCBI gene:Acc:895541]                                                 | 3.712391787 | 1.564219844  | -0.84677776  | 1.301878831  |
|  | ENSORLG000000021753 | ND1            | NAADH dehydrogenase subunit 1 [Source:NCBI gene:Acc:895541]                                                | 3.178893512 | 1.026975445  | -0.098104602 | 2.054298447  |
|  | ENSORLG000000007292 | metr1a         | metrionin like, glial cell differentiation regulator<br>[Source:NCBI gene:Acc:101166875]                   | 3.468941135 | 0.642814205  | -0.303745223 | 2.522866786  |
|  | ENSORLG000000004130 | mb             | myoD protein [Source:NCBI gene:Acc:101156224]                                                              | 8.98274534  | -0.631610862 | -7.664404818 | 1.950439931  |
|  | ENSORLG000000006083 | -              | -                                                                                                          | 4.849126811 | -0.138200024 | -2.955103388 | 2.054115289  |
|  | ENSORLG000000013153 | apodb (1 of m) | apolipoprotein Db [Source:ZFIN,Acc:ZDB-GENE-051023-8]                                                      | 7.236043034 | 3.012957613  | -2.626019964 | 1.597550856  |
|  | ENSORLG000000013965 | ret            | ret proto-oncogene receptor tyrosine kinase<br>[Source:ZFIN,Acc:ZDB-GENE-980526-307]                       | 3.410363581 | -0.681607479 | -2.745414936 | 1.347041391  |
|  | ENSORLG000000017142 | itkb           | inositol-trisphosphate 3-kinase B [Source:ZFIN,Acc:ZDB-GENE-041014-166]                                    | 3.212740056 | 2.108308784  | 0.291038256  | 1.399594604  |
|  | ENSORLG000000016711 | meox2a         | mesenchyme homeobox 2a [Source:ZFIN,Acc:ZDB-GENE-090613-1]                                                 | 15.80618936 | 13.24318737  | -2.356127575 | 0.207340063  |
|  | ENSORLG000000017937 | -              | -                                                                                                          | 3.006467722 | 0.533796077  | -2.962077734 | -0.488861316 |
|  | ENSORLG000000004460 | pk4            | pyruvate dehydrogenase kinase, isozyme 4<br>[Source:ZFIN,Acc:ZDB-GENE-060503-754]                          | 4.137719682 | 1.844763143  | -0.866304662 | 1.427137717  |
|  | ENSORLG000000001463 | eml2           | echinoderm microtubule associated protein like 2<br>[Source:ZFIN,Acc:ZDB-GENE-050706-71]                   | 3.97892688  | 0.634635337  | -2.391824877 | 0.952951593  |
|  | ENSORLG000000012199 | MAPKAPK3       | mitogen-activated protein kinase-activated protein kinase 3 [Source:HGNC Symbol,Acc:HGNC:6888]             | 3.069596776 | 1.950563439  | 0.143375725  | 1.262894016  |
|  | ENSORLG000000002020 | -              | -                                                                                                          | 4.500474772 | 1.708415937  | -3.394808139 | -0.602264303 |
|  | ENSORLG000000015001 | pmela          | premelanosome protein a [Source:ZFIN,Acc:ZDB-GENE-030131-9818]                                             | 4.71066297  | 0.60465386   | -2.29884088  | 1.807653254  |
|  | ENSORLG000000004713 | iftfp5a        | insulin-like growth factor binding protein 5a<br>[Source:ZFIN,Acc:ZDB-GENE-070520-8]                       | 6.118255007 | 0.921415979  | -3.864508332 | 1.332816241  |
|  | ENSORLG000000000449 | ckma           | creatine kinase M-type [Source:NCBI gene:Acc:101166239]                                                    | 6.666240738 | -1.038330727 | -7.53135972  | 0.173694098  |
|  | ENSORLG000000016062 | plcx1          | phosphatidylinositol-specific phospholipase C, X domain containing 1 [Source:ZFIN,Acc:ZDB-GENE-131127-240] | 3.697896011 | 1.967257757  | -0.968311256 | 0.762752071  |
|  | ENSORLG000000002435 | SPRED2         | sprouty related EVH1 domain containing 2<br>[Source:HGNC Symbol,Acc:HGNC:17722]                            | 4.667712073 | 1.911597178  | -1.448947998 | 1.307651594  |
|  | ENSORLG000000010872 | -              | -                                                                                                          | 3.324968508 | 2.184657427  | 1.58813085   | 2.708925166  |
|  | ENSORLG000000009429 | nr2f2          | nuclear receptor subfamily 2, group F, member 2<br>[Source:ZFIN,Acc:ZDB-GENE-990415-257]                   | 3.298882184 | 1.809396953  | -1.619177644 | -0.129207309 |
|  | ENSORLG000000007187 | si.ch1073-184  | si.ch1073-184c2.1 [Source:ZFIN,Acc:ZDB-GENE-081104-74]                                                     | 9.337707948 | 4.431398478  | -3.998096596 | 0.908680733  |
|  | ENSORLG000000009131 | SLC16A7        | solute carrier family 16 member 7 [Source:HGNC Symbol,Acc:HGNC:10928]                                      | 4.047961769 | 1.234519571  | -1.196004731 | 1.617928881  |
|  | ENSORLG000000000490 | -              | -                                                                                                          | 3.589514847 | 1.105290182  | -0.236587787 | 2.248121765  |
|  | ENSORLG000000001085 | -              | -                                                                                                          | 4.656869767 | 2.598020711  | -1.100758072 | 1.059121581  |
|  | ENSORLG000000001383 | -              | -                                                                                                          | 3.014039953 | 2.84710195   | -4.055948587 | -3.888526012 |
|  | ENSORLG000000008455 | cdt3fab        | platelet derived growth factor subunit A [Source:NCBI gene:Acc:101158282]                                  | 5.046079451 | 2.294904722  | -2.06560317  | 0.686055999  |
|  | ENSORLG000000020952 | RFO0001        | ES ribosome RNA [Source:NCBI gene:Acc:111949014]                                                           | 7.368534603 | 4.775574153  | 0.292040973  | 2.883492478  |
|  | ENSORLG000000015472 | -              | -                                                                                                          | 4.709484438 | 3.42942191   | -0.97866333  | 0.301878702  |
|  | ENSORLG000000006152 | rg1            | immunoresponsive gene 1, like [Source:ZFIN,Acc:ZDB-GENE-081103-301]                                        | 5.237260978 | 0.950342776  | -6.440269667 | -0.356624318 |
|  | ENSORLG000000014801 | znf292a        | zinc finger protein 292a [Source:ZFIN,Acc:ZDB-GENE-071004-18]                                              | 3.209196447 | 1.94985018   | 1.295136343  | 2.554967379  |
|  | ENSORLG000000006559 | dup1           | dual specificity phosphatase 1 [Source:ZFIN,Acc:ZDB-GENE-040426-2018]                                      | 3.946381482 | 0.935582038  | -1.225257187 | 1.786027344  |
|  | ENSORLG000000015372 | -              | -                                                                                                          | 3.689909153 | 2.631943932  | -1.292208077 | -0.233754635 |
|  | ENSORLG000000017760 | dct            | dicoumarol tautomerase [Source:ZFIN,Acc:ZDB-GENE-000508-1]                                                 | 3.954361226 | 0.634771596  | -0.873530442 | 2.446543272  |
|  | ENSORLG00000002614  | FBN1           | fibrillin 1 [Source:HGNC Symbol,Acc:HGNC:3603]                                                             | 3.408420467 | 1.662185511  | -1.783292254 | -0.036572096 |
|  | ENSORLG000000017906 | -              | -                                                                                                          | 3.07690093  | 1.695241981  | -1.125796445 | 0.256347414  |
|  | ENSORLG000000009085 | ap1nb          | apelin receptor b [Source:ZFIN,Acc:ZDB-GENE-050913-90]                                                     | 4.377136024 | 2.079199646  | -1.451286428 | 0.847135277  |
|  | ENSORLG000000010894 | -              | -                                                                                                          | 16.00793283 | 12.5268828   | -0.53418178  | 2.348522477  |
|  | ENSORLG000000016106 | -              | -                                                                                                          | 7.057921336 | 5.430707975  | -1.13840188  | 0.487161015  |
|  | ENSORLG000000010823 | ctse           | catherin C [Source:ZFIN,Acc:ZDB-GENE-030619-9]                                                             | 3.910709261 | 0.886791441  | -2.157002103 | 0.867400646  |
|  | ENSORLG000000011195 | zgc:165502     | I2UMO1 receptor, JUNO [Source:HGNC Symbol,Acc:HGNC:20265]                                                  | 5.910715022 | 1.019588224  | -3.699679354 | 1.191932257  |
|  | ENSORLG000000007224 | -              | -                                                                                                          | 4.867813875 | 1.495021844  | -1.085582982 | 2.287693818  |
|  | ENSORLG000000005228 | -              | -                                                                                                          | 3.581834027 | 1.728116608  | -1.049773203 | 0.80442899   |
|  | ENSORLG000000007884 | -              | -                                                                                                          | 3.910982511 | -0.461658556 | -3.08657412  | 1.3118658    |
|  | ENSORLG000000009507 | -              | -                                                                                                          | 4.314043266 | 1.472829113  | -0.64599494  | 2.195702421  |
|  | ENSORLG000000006848 | ptgir          | prostaglandin I2 receptor [Source:ZFIN,Acc:ZDB-GENE-120511-1]                                              | 4.261597001 | 1.417528693  | -2.161846682 | 0.682705658  |
|  | ENSORLG000000016791 | bcl2b          | BCL2, apoptosis regulator b [Source:ZFIN,Acc:ZDB-GENE-110411-185]                                          | 4.535877934 | 1.77606758   | -1.362304578 | 1.397991993  |
|  | ENSORLG000000003383 | chdh           | choline dehydrogenase [Source:ZFIN,Acc:ZDB-GENE-110211-1]                                                  | 3.813556783 | 2.081358022  | 0.233954952  | 1.966638735  |
|  | ENSORLG000000021622 | RFO0405        | small nucleolar RNA SNORA44 [Source:NCBI gene:Acc:111948272]                                               | 4.163079204 | 2.305803319  | 0.485033777  | 2.342794384  |
|  | ENSORLG000000002726 | shna1b         | shna like 1 [Source:NCBI gene:Acc:101156648]                                                               | 4.738888812 | 1.499528647  | -1.542201411 | 1.698621713  |
|  | ENSORLG000000004915 | TNFRSF11B      | TNF receptor superfamily member 11b [Source:HGNC Symbol,Acc:HGNC:11909]                                    | 6.690315894 | 3.879078844  | -0.915020949 | 1.896712906  |
|  | ENSORLG000000010754 | si.ch73-174b1  | si.ch73-174b16.4 [Source:ZFIN,Acc:ZDB-GENE-160728-69]                                                      | 3.343574526 | 1.103084913  | -0.335286593 | 1.905688338  |
|  | ENSORLG000000005509 | ngfrb          | nerve growth factor receptor b [Source:ZFIN,Acc:ZDB-GENE-070806-2]                                         | 3.21935972  | 0.08383287   | -1.52549551  | 1.610638407  |
|  | ENSORLG000000007478 | mnmat2         | nicotinamide nucleotide adenyltransferase 2<br>[Source:NCBI gene:Acc:101156529]                            | 16.18988574 | 13.00350913  | -0.554440136 | 2.632405182  |
|  | ENSORLG000000007556 | her6           | hevy-related 6 [Source:ZFIN,Acc:ZDB-GENE-980526-144]                                                       | 3.494350718 | 1.599639782  | -0.469914775 | 1.425280972  |
|  | ENSORLG000000002112 | srna23         | serine protease 23 [Source:ZFIN,Acc:ZDB-GENE-030131-9149]                                                  | 4.268868495 | 2.474990232  | -1.340061236 | 0.454302093  |
|  | ENSORLG000000015886 | 307            | dermatocanin [Source:NCBI gene:Acc:101166619]                                                              | 4.645439353 | 1.920194515  | -3.178050512 | -0.492876996 |
|  | ENSORLG000000016705 | ACVR1C         | activin A receptor type 1C [Source:HGNC Symbol,Acc:HGNC:18123]                                             | 5.401154318 | -2.167387159 | -1.363755552 | 6.205249355  |
|  | ENSORLG000000009387 | plaua          | plasminogen activator, urokinase type<br>[Source:ZFIN,Acc:ZDB-GENE-030313-278]                             | 4.510260041 | 3.291322605  | -0.709910272 | 0.509881706  |
|  | ENSORLG000000010627 | -              | -                                                                                                          | 4.944068258 | 1.866728957  | -1.787143962 | 1.290678001  |
|  | ENSORLG000000013293 | -              | -                                                                                                          | 6.693410426 | 1.6279778    | -0.789988887 | 1.26692847   |
|  | ENSORLG000000004482 | map3k8         | mitogen-activated protein kinase kinase 8<br>[Source:ZFIN,Acc:ZDB-GENE-100316-8]                           | 3.208463209 | -0.037921467 | -1.308119165 | 1.938750638  |
|  | ENSORLG000000000616 | -              | -                                                                                                          | 5.878437766 | 0.38142029   | -3.19015672  | 2.308486278  |

|                     |                |                                                                                                                             |             |              |              |               |
|---------------------|----------------|-----------------------------------------------------------------------------------------------------------------------------|-------------|--------------|--------------|---------------|
| ENSORLG00000009873  | sdkey-26133    | carbohydrate sulfotransferase 12 [Source:NCBI gene:Acc:101166690]                                                           | 3.733738843 | 2.496481419  | -0.437435208 | 0.798307842   |
| ENSORLG00000002620  | ast16          | ankyrin repeat and SOCS box containing 16 [Source:ZFIN:Acc:ZDB-GENE-031031-3]                                               | 3.335149755 | -0.138675325 | -1.088338363 | 2.385970923   |
| ENSORLG00000003028  | -              | -                                                                                                                           | 4.634832873 | 1.187250656  | -2.700016204 | 0.748048918   |
| ENSORLG000000012170 | MAFG (1 of m   | transcription factor MAFG [Source:NCBI gene:Acc:101156633]                                                                  | 16.97535596 | 11.61654425  | -2.444044293 | 2.915235775   |
| ENSORLG000000012100 | itr82          | Int1RIM family, member 82 [Source:ZFIN:Acc:ZDB-GENE-030219-207]                                                             | 3.957705437 | 2.315919416  | -1.68574084  | -0.043470021  |
| ENSORLG000000012708 | lyn            | LYN proto-oncogene, Src family tyrosine kinase [Source:ZFIN:Acc:ZDB-GENE-040912-7]                                          | 4.381223008 | 1.513035605  | -2.354131077 | 0.514539864   |
| ENSORLG000000009318 | -              | -                                                                                                                           | 5.842224073 | 2.172296555  | -1.17958588  | 2.383853447   |
| ENSORLG000000011180 | apc1a          | apiclinic 1a [Source:ZFIN:Acc:ZDB-GENE-051120-147]                                                                          | 4.370002951 | 0.805963536  | -0.861518679 | 2.69004904    |
| ENSORLG000000012055 | hkl1           | H2D-like homeo box 1 (Drosophila) [Source:ZFIN:Acc:ZDB-GENE-030131-5304]                                                    | 4.078315828 | 1.618061769  | -2.182976085 | 0.2776247     |
| ENSORLG00000002904  | ctdnh1 (1 of m | ctdnh1 [Source:ZFIN:Acc:ZDB-GENE-010328-8]                                                                                  | 4.578075101 | -2.311795793 | -4.495786547 | 2.396618749   |
| ENSORLG000000007239 | -              | -                                                                                                                           | 4.854353503 | 1.080830391  | -1.498396706 | 2.275610749   |
| ENSORLG000000003645 | ahhd14b        | ahhydrolase domain containing 14B [Source:ZFIN:Acc:ZDB-GENE-040426-1343]                                                    | 4.293386312 | 0.756309106  | -1.685885805 | 1.851675986   |
| ENSORLG000000015171 | slcl6a10       | solute carrier family 2 (anion/cation exchanger), member 10 [Source:ZFIN:Acc:ZDB-GENE-040426-1524]                          | 4.410040589 | 0.577596738  | -2.30603787  | 1.52689066    |
| ENSORLG000000002007 | efemp2a        | EGF containing fibulin extracellular matrix protein 2a [Source:ZFIN:Acc:ZDB-GENE-041212-3]                                  | 4.296368417 | 2.295350141  | -2.347666362 | -0.346184101  |
| ENSORLG000000012725 | ldr2           | immunoglobulin-like domain containing receptor 2 [Source:ZFIN:Acc:ZDB-GENE-050708-83]                                       | 3.664745061 | 1.761519044  | 0.317957343  | 2.22166855    |
| ENSORLG000000013339 | xyfl1          | xylofuranase 1 [Source:ZFIN:Acc:ZDB-GENE-1111017-2]                                                                         | 4.324952079 | 0.331796636  | -1.343057883 | 2.650623596   |
| ENSORLG000000015871 | hds1           | hematopoietic cell-specific Lyn substrate 1 [Source:ZFIN:Acc:ZDB-GENE-030131-7191]                                          | 3.510863834 | 2.021478622  | 0.573325124  | 2.06319446    |
| ENSORLG000000016085 | hpk2           | homeodomain interacting protein kinase 2 [Source:ZFIN:Acc:ZDB-GENE-031125-4]                                                | 3.163213322 | 0.949790948  | -3.110075558 | -0.896169037  |
| ENSORLG000000017511 | NT5E (1 of m   | 5'-nucleotidase ecto [Source:HGNC Symbol/Acc:HGNC:8021]                                                                     | 4.674935025 | 2.977083451  | -0.873655179 | 0.82497241    |
| ENSORLG000000009712 | slc5a1         | solute carrier family 5 (sodium/glucose cotransporter), member 1 [Source:ZFIN:Acc:ZDB-GENE-040426-1524]                     | 4.583050974 | 0.727344382  | -3.273244705 | 0.582946995   |
| ENSORLG000000002126 | avpr1ab        | arginine vasopressin receptor 1A [Source:ZFIN:Acc:ZDB-GENE-041210-105]                                                      | 3.46931979  | 2.022523152  | 0.005908503  | 1.45318977    |
| ENSORLG000000012908 | -              | -                                                                                                                           | 3.590215623 | 0.859306665  | -0.879756595 | 1.85167594    |
| ENSORLG000000002823 | sema6dl        | sema domain, transmembrane domain (TM), and cytoplasmic domain, (semaphorin) 6D, like [Source:ZFIN:Acc:ZDB-GENE-050417-171] | 5.96179762  | 3.322936141  | -0.393006076 | 2.246344034   |
| ENSORLG000000007290 | -              | -                                                                                                                           | 5.22090146  | 2.127262349  | -1.365261975 | 1.730050848   |
| ENSORLG000000004201 | -              | -                                                                                                                           | 3.32797672  | 1.571421417  | -0.258601925 | 1.498439236   |
| ENSORLG000000006036 | rbck1          | RanBP type and C3H1-type zinc finger containing 1 [Source:ZFIN:Acc:ZDB-GENE-040704-3]                                       | 4.197146584 | 0.34072109   | -1.89450836  | 1.962401815   |
| ENSORLG000000015390 | dgkaa          | diacylglycerol kinase, alpha [Source:ZFIN:Acc:ZDB-GENE-060516-305]                                                          | 3.461069611 | 0.933222519  | -0.210760979 | 2.317570499   |
| ENSORLG00000002237  | slc17a5        | solute carrier family 17 (acidic sugar transporter), member 5 [Source:ZFIN:Acc:ZDB-GENE-060929-1158]                        | 3.479668883 | -0.10217234  | -1.94867904  | 1.633646834   |
| ENSORLG000000011584 | -              | -                                                                                                                           | 2.005031314 | 2.216285641  | -2.501198277 | -0.7119687377 |
| ENSORLG000000016851 | -              | -                                                                                                                           | 5.852979446 | 1.322502909  | -2.47118626  | 2.060794161   |
| ENSORLG000000021761 | -              | -                                                                                                                           | 4.195025131 | 0.923515803  | -1.039518184 | 2.232476138   |
| ENSORLG000000006029 | ndst3          | N-deacetylase/N-sulfotransferase (heparan glucosaminyl) 3 [Source:ZFIN:Acc:ZDB-GENE-090312-199]                             | 3.65271495  | 0.913276734  | -3.435435922 | -0.695514752  |
| ENSORLG000000015572 | gpr17          | G protein-coupled receptor 17 [Source:ZFIN:Acc:ZDB-GENE-100922-133]                                                         | 16.59203782 | 0            | -2.272401505 | 14.32012783   |
| ENSORLG000000014029 | -              | -                                                                                                                           | 4.321548507 | 2.317590869  | -2.812124073 | -0.807681339  |
| ENSORLG000000005970 | -              | -                                                                                                                           | 5.319592106 | 1.746020315  | -2.828558977 | 0.718610041   |
| ENSORLG000000008925 | -              | -                                                                                                                           | 4.334251228 | 1.792683591  | 0.061187124  | 2.62342037    |
| ENSORLG000000010727 | thbs2a         | thrombospondin 2a [Source:ZFIN:Acc:ZDB-GENE-020708-2]                                                                       | 3.767736679 | 1.635743874  | -0.684761584 | 1.447715851   |
| ENSORLG000000010452 | -              | -                                                                                                                           | 3.992530292 | 0.556669714  | -1.132678727 | 2.30367771    |
| ENSORLG000000017073 | csf44          | C-C motif chemokine 17 [Source:NCBI gene:Acc:101161792]                                                                     | 4.138063686 | 1.813780212  | -2.335508455 | -0.010740179  |
| ENSORLG000000013510 | mamdc2b        | MAM domain containing 2b [Source:ZFIN:Acc:ZDB-GENE-091117-16]                                                               | 3.166265468 | 0.749188828  | -1.70223465  | 0.697337949   |
| ENSORLG000000004967 | heph1b         | hephaestin-like 1b [Source:ZFIN:Acc:ZDB-GENE-091204-388]                                                                    | 4.673776792 | 2.460052588  | -1.114144796 | 1.10063997    |
| ENSORLG000000002567 | id4            | DNA-binding protein inhibitor ID-4 [Source:NCBI gene:Acc:101162314]                                                         | 5.83376248  | 0.63356815   | -2.901870394 | 2.299020297   |
| ENSORLG000000014514 | esr1           | estrogen receptor 1 [Source:ZFIN:Acc:ZDB-GENE-020806-5]                                                                     | 4.652918792 | 2.641021093  | -1.223747966 | 0.788634749   |
| ENSORLG000000006967 | -              | -                                                                                                                           | 7.644735293 | 2.694762566  | -5.358201522 | -0.405743891  |
| ENSORLG000000016741 | msx1a          | neuronal vesicle trafficking associated 1 [Source:NCBI gene:Acc:101168617]                                                  | 3.489663825 | 0.013582346  | -0.973689611 | 2.502876168   |
| ENSORLG000000015380 | -              | -                                                                                                                           | 6.69709068  | 1.897526888  | -5.155899255 | -0.375845401  |
| ENSORLG000000015799 | -              | -                                                                                                                           | 3.558886062 | 1.15798625   | -0.962057979 | 1.433282553   |
| ENSORLG000000003410 | zpc-91968      | melanoregulin [Source:NCBI gene:Acc:101159745]                                                                              | 5.222695671 | 0.872814244  | -1.452051048 | 2.898317798   |
| ENSORLG000000007003 | pkc2           | polycystic kidney disease 2 [Source:ZFIN:Acc:ZDB-GENE-040827-4]                                                             | 3.250241013 | 1.664765625  | 0.240824503  | 1.82678476    |
| ENSORLG000000013610 | -              | -                                                                                                                           | 15.68064055 | 0            | -15.68063533 | 0             |
| ENSORLG000000009458 | pk3cg          | phosphatidylinositol-4,5-bisphosphate 3-kinase, catalytic subunit gamma [Source:ZFIN:Acc:ZDB-GENE-040426-2532]              | 3.582887285 | 1.804942619  | -0.601072163 | 1.177356868   |
| ENSORLG000000000187 | ocad2          | OCA domain containing 2 [Source:NCBI gene:Acc:101175427]                                                                    | 16.01092666 | 12.33060041  | -0.91287095  | 2.767955512   |
| ENSORLG000000000802 | enpp2          | ectonucleotide pyrophosphatase/phosphodiesterase 2 [Source:ZFIN:Acc:ZDB-GENE-040426-1156]                                   | 4.765256771 | 2.88439528   | -2.260004061 | -0.378651988  |
| ENSORLG000000011266 | stard10        | STAR-related lipid transfer (STAR) domain containing 10 [Source:ZFIN:Acc:ZDB-GENE-040426-1797]                              | 4.051138477 | 2.281159588  | -0.672095029 | 1.098368467   |
| ENSORLG000000015653 | slc21l1-210b   | slc21l1-210b2 3 [Source:ZFIN:Acc:ZDB-GENE-131122-13]                                                                        | 3.418519965 | 1.669339712  | 0.048265307  | 1.797927538   |
| ENSORLG000000012089 | gsmr1          | peptidase domain containing associated with muscle regeneration 1 [Source:ZFIN:Acc:ZDB-GENE-100422-12]                      | 3.492300294 | 2.326462147  | 1.446848529  | 2.613171486   |
| ENSORLG000000014312 | serpin1b       | serpin family H member 1 [Source:NCBI gene:Acc:100529194]                                                                   | 4.060017288 | 2.164640836  | -1.121091808 | 0.774769604   |
| ENSORLG000000013930 | mafbb          | v-maf avian musculoaponeurotic fibrosarcoma oncogene homolog Bb [Source:ZFIN:Acc:ZDB-GENE-010605-4]                         | 4.685064799 | 1.832261703  | -3.009594729 | -0.156308813  |
| ENSORLG000000006650 | capn12         | cataalin 12 [Source:ZFIN:Acc:ZDB-GENE-050419-245]                                                                           | 4.238135563 | -2.860135415 | -2.0894864   | 5.068628732   |
| ENSORLG000000018002 | -              | -                                                                                                                           | 3.884881172 | 1.8714938    | -0.571168856 | 1.442503435   |
| ENSORLG000000011630 | -              | -                                                                                                                           | 7.595785497 | 3.261600213  | -4.032128454 | 0.302538288   |
| ENSORLG000000011416 | -              | -                                                                                                                           | 3.580596175 | 1.13543843   | -0.612054714 | 1.833587518   |
| ENSORLG000000010547 | prf5a          | proline rich 5a (renal) [Source:ZFIN:Acc:ZDB-GENE-130530-791]                                                               | 3.453216671 | 1.305657222  | -1.398798006 | 0.749254205   |
| ENSORLG000000015985 | -              | -                                                                                                                           | 6.302628336 | 0.004749658  | -3.478952543 | 2.819411164   |
| ENSORLG000000012688 | star           | matrix metalloproteinase, astacin regulatory protein (star), mRNA [Source:RefSeq]                                           | 3.65111295  | 1.74442958   | 1.02571961   | 2.932877806   |
| ENSORLG000000013340 | -              | -                                                                                                                           | 15.94710519 | 14.37756709  | -1.571919999 | -0.181914105  |
| ENSORLG000000006594 | mmp25b         | matrix metalloproteinase 25b [Source:ZFIN:Acc:ZDB-GENE-100308-4]                                                            | 5.605990908 | 2.94362532   | -3.061523891 | -0.398665812  |
| ENSORLG000000004996 | hoxa4a         | homeobox protein Hox-A3a [Source:NCBI gene:Acc:100301584]                                                                   | 6.232963216 | 2.113529381  | -2.657587375 | 1.462331794   |
| ENSORLG000000017889 | -              | -                                                                                                                           | 3.634420072 | 0.732681778  | -2.322961604 | 0.579261286   |



|                     |                   |                                                                                                                             |             |              |              |              |
|---------------------|-------------------|-----------------------------------------------------------------------------------------------------------------------------|-------------|--------------|--------------|--------------|
| ENSORL0000000586    | -                 | -                                                                                                                           | 4.309168752 | -2.277067932 | -4.40746576  | 2.179260585  |
| ENSORL000000016155  | adam28            | ADAM metalloproteinase domain 28 [Source:ZFIN;Acc:ZDB-GENE-060929-532]                                                      | 4.326649357 | 0.412013754  | -1.904752343 | 2.010369402  |
| ENSORL00000002089   | cow6a2            | cytochrome c oxidase subunit Via polypeptide 2 [Source:ZFIN;Acc:ZDB-GENE-040912-129]                                        | 6.909030232 | 1.335213996  | -2.938474973 | 2.63582624   |
| ENSORL000000013898  | SLC6A18           | solute carrier family 6 member 18 [Source:HGNC Symbol;Acc:HGNC:26441]                                                       | 4.637168667 | -1.029798099 | -3.203851772 | 2.463599986  |
| ENSORL00000001423   | foxa3             | forkhead box A3 [Source:ZFIN;Acc:ZDB-GENE-980526-423]                                                                       | 6.403827935 | 0.270875174  | -3.244336603 | 2.889100965  |
| ENSORL000000005991  | TNNI2 (1 of m     | troponin 12, fast skeletal type [Source:HGNC Symbol;Acc:HGNC:11946]                                                         | 4.129144418 | -1.817249628 | -5.77026182  | 0.176617996  |
| ENSORL00000004530   | ezr66             | ezrin domain-4 [Source:NCBI gene;Acc:101174176]                                                                             | 3.751365226 | 0.382081953  | -1.662058964 | 1.707708347  |
| ENSORL000000016196  | zfp174917         | zfp174917 [Source:ZFIN;Acc:ZDB-GENE-070929-421]                                                                             | 4.017435291 | 0.985142062  | -1.951425707 | 1.080752979  |
| ENSORL00000004948   | -                 | -                                                                                                                           | 4.87513674  | 1.775597372  | -0.805088959 | 2.29494741   |
| ENSORL000000010789  | RAB38 (1 of m     | RAB38, member RAS oncogene family [Source:HGNC Symbol;Acc:HGNC:93776]                                                       | 4.002897588 | 2.395538936  | -0.194372886 | 1.41347076   |
| ENSORL000000004510  | -                 | -                                                                                                                           | 4.399618036 | 2.294034776  | -2.838591641 | -0.732523417 |
| ENSORL000000009691  | -                 | -                                                                                                                           | 3.906404772 | 1.841301891  | 0.876321123  | 2.941910226  |
| ENSORL000000016702  | -                 | -                                                                                                                           | 3.821687481 | 2.113904882  | -1.4911449   | 0.217423638  |
| ENSORL000000015308  | dcn               | decorin [Source:ZFIN;Acc:ZDB-GENE-010102-1]                                                                                 | 3.485832723 | 2.154722688  | -2.218205918 | -0.886610732 |
| ENSORL000000012111  | ipar1             | lysophosphatidic acid receptor 1 [Source:ZFIN;Acc:ZDB-GENE-030616-499]                                                      | 3.889302836 | 3.062559088  | 0.621639482  | 1.448867965  |
| ENSORL000000009682  | -                 | -                                                                                                                           | 3.73069374  | 0.337465335  | -2.315918817 | 1.077715001  |
| ENSORL0000000014763 | fam234b           | family with sequence similarity 234, member B [Source:ZFIN;Acc:ZDB-GENE-030131-2308]                                        | 3.057536058 | -0.42584915  | -1.604128503 | 1.879741185  |
| ENSORL000000002921  | nuak1b            | NUAK family, SHP1-like kinases, 1b [Source:ZFIN;Acc:ZDB-GENE-131120-18]                                                     | 3.652289862 | 1.953206087  | -1.600884323 | 0.09968414   |
| ENSORL000000005029  | -                 | -                                                                                                                           | 3.45092005  | -0.255570422 | -3.600648605 | 0.106327249  |
| ENSORL000000008729  | cavin2a           | caveolin associated protein 2a [Source:ZFIN;Acc:ZDB-GENE-090313-215]                                                        | 4.560456192 | 1.466932817  | -1.812231445 | 1.281776691  |
| ENSORL000000010906  | p2ry6             | P2Y receptor family member 8 [Source:ZFIN;Acc:ZDB-GENE-070912-447]                                                          | 3.113647166 | 2.739715324  | -0.87893418  | -0.504517897 |
| ENSORL000000008593  | -                 | -                                                                                                                           | 5.442428514 | 2.578081239  | -0.072324824 | 2.792506618  |
| ENSORL000000005037  | hoxa11a           | homeobox A11a [Source:ZFIN;Acc:ZDB-GENE-000823-8]                                                                           | 4.286082436 | 0.565869286  | -2.014815335 | 1.705883945  |
| ENSORL000000013091  | hhk               | ketohexokinase [Source:ZFIN;Acc:ZDB-GENE-040718-381]                                                                        | 3.938689122 | 0.790841176  | -2.176357017 | 0.971976036  |
| ENSORL000000014348  | cavin1b           | caveolin associated protein 1b [Source:ZFIN;Acc:ZDB-GENE-030131-3509]                                                       | 3.807123514 | 2.301332484  | -2.061674781 | -0.55539886  |
| ENSORL000000006233  | si.ch211-5941     | -                                                                                                                           | 4.137092181 | 1.309548884  | -1.087909628 | 1.740072595  |
| ENSORL000000011214  | -                 | -                                                                                                                           | 5.319771716 | 1.096037176  | -2.743801958 | 1.480417643  |
| ENSORL000000001073  | crocc2            | ciliary rootlet coiled-coil, rootletin family member 2 [Source:ZFIN;Acc:ZDB-GENE-131121-625]                                | 4.268812318 | 2.079376421  | -0.409913497 | 1.780006586  |
| ENSORL000000004725  | cep170aa          | centrosomal protein 170Aa [Source:ZFIN;Acc:ZDB-GENE-090312-109]                                                             | 4.332121715 | 1.961293035  | 0.042636389  | 2.413955175  |
| ENSORL000000013417  | barx2             | BARX homeobox 2 [Source:NCBI gene;Acc:101170038]                                                                            | 4.197363354 | 0.209473582  | -2.874967339 | 1.113407152  |
| ENSORL000000012953  | hey1              | hes-related family D/HLH transcription factor with YRPW motif 1 [Source:ZFIN;Acc:ZDB-GENE-000607-70]                        | 3.674829417 | 0.899755352  | -1.459956348 | 1.315602918  |
| ENSORL000000003950  | acs2l             | acyl-Coenzyme A synthetase, cytosolic [Source:NCBI gene;Acc:101172107]                                                      | 4.354873312 | 2.179497385  | -1.749239792 | 0.4266223    |
| ENSORL0000000004942 | lhx1              | ligand of numb-protein X 1 [Source:ZFIN;Acc:ZDB-GENE-030131-3439]                                                           | 4.722549965 | 1.539012818  | -2.709756929 | 0.474266182  |
| ENSORL000000018012  | esr2b             | estrogen receptor 2b [Source:ZFIN;Acc:ZDB-GENE-030116-1]                                                                    | 4.098141509 | 1.040629626  | -1.580189243 | 1.477807952  |
| ENSORL000000002405  | dmgdh             | dimethylglycine dehydrogenase [Source:ZFIN;Acc:ZDB-GENE-080227-8]                                                           | 5.881233165 | 1.630571592  | -2.289529025 | 1.961617417  |
| ENSORL000000015247  | cdk19             | cyclin-dependent kinase 19 [Source:ZFIN;Acc:ZDB-GENE-040724-19]                                                             | 3.233721331 | 1.397791558  | -0.00284796  | 1.828130688  |
| ENSORL000000006617  | si.ch211-1139c    | si.ch211-1139c                                                                                                              | 5.136177903 | 0.633249591  | -0.861719003 | 3.641691165  |
| ENSORL000000002925  | -                 | -                                                                                                                           | 4.826570728 | 2.878996167  | -0.763700710 | 1.221455889  |
| ENSORL000000010397  | -                 | -                                                                                                                           | 3.841148664 | 1.958010183  | -2.051122284 | 2.198200113  |
| ENSORL000000015009  | eeef2b            | eukaryotic translation elongation factor 2 [Source:NCBI gene;Acc:101162480]                                                 | 4.492864998 | 1.625884119  | -0.725144813 | 1.242322136  |
| ENSORL000000017943  | folistatin like 1 | folistatin like 1 [Source:NCBI gene;Acc:101174309]                                                                          | 3.715301335 | 2.652884379  | -1.475159707 | -0.412257829 |
| ENSORL000000006861  | BLNK              | B cell linker [Source:HGNC Symbol;Acc:HGNC:14711]                                                                           | 4.600491027 | 2.736465198  | -1.699338585 | 0.165091605  |
| ENSORL000000004528  | -                 | -                                                                                                                           | 3.603842823 | 2.142328336  | -0.439067559 | 1.02940308   |
| ENSORL000000016565  | qrfb3             | transforming growth factor, beta 3 [Source:ZFIN;Acc:ZDB-GENE-030723-4]                                                      | 4.094384778 | 1.668106848  | -1.030927407 | 1.3958355    |
| ENSORL000000007122  | CNTNAP2           | contactin associated protein like 2 [Source:HGNC Symbol;Acc:HGNC:13830]                                                     | 3.25041849  | -14.21672616 | -4.015360896 | 13.45228629  |
| ENSORL000000009579  | -                 | -                                                                                                                           | 3.996897485 | 1.539754827  | -0.68664605  | 1.771581188  |
| ENSORL0000000003181 | noxo1b            | NADPH oxidase organizer 1b [Source:ZFIN;Acc:ZDB-GENE-101203-1]                                                              | 3.824105494 | -0.20909344  | -2.32366483  | 1.709818077  |
| ENSORL0000000015062 | -                 | -                                                                                                                           | 3.363912845 | 2.230002853  | -1.255957751 | -0.121562808 |
| ENSORL0000000005251 | grem2a            | gremlin 2, DAN family BMP antagonist a [Source:ZFIN;Acc:ZDB-GENE-131127-498]                                                | 4.41417143  | -1.305756364 | -0.374899691 | 5.346925191  |
| ENSORL000000006031  | gna3              | guanine nucleotide binding protein (G protein), alpha inhibiting activity polypeptide 3 [Source:ZFIN;Acc:ZDB-GENE-070713-6] | 6.286126642 | 4.75032571   | 0.78405466   | 2.320794484  |
| ENSORL000000002212  | -                 | -                                                                                                                           | 4.158062896 | 0.473876365  | -1.540947071 | 2.144773818  |
| ENSORL000000014037  | si.ch73-334d1     | si.ch73-334d1 [Source:ZFIN;Acc:ZDB-GENE-091118-35]                                                                          | 5.349465216 | 2.551166449  | -2.908106305 | -0.109322375 |
| ENSORL000000012678  | GPR137B (1 of     | G protein-coupled receptor 137B [Source:HGNC Symbol;Acc:HGNC:11862]                                                         | 3.666496197 | 1.385183589  | -2.254392742 | 0.027405024  |
| ENSORL000000010799  | -                 | -                                                                                                                           | 3.151397055 | 0.11578039   | -0.100152239 | 2.93951601   |
| ENSORL000000015549  | bin2a             | bridging integrator 2a [Source:ZFIN;Acc:ZDB-GENE-041114-126]                                                                | 5.461214458 | 1.105150771  | -1.83971307  | 2.51677873   |
| ENSORL0000000101131 | ifitb             | interferon regulatory factor 1 [Source:NCBI gene;Acc:101163420]                                                             | 4.282340898 | 1.920439338  | -0.607485749 | 1.754900642  |
| ENSORL0000000010505 | ms2a              | mesin 2a [Source:ZFIN;Acc:ZDB-GENE-090312-163]                                                                              | 4.037578248 | 1.982364128  | -2.128712488 | 0.527000533  |
| ENSORL0000000010591 | ckmb              | creatine kinase M-type [Source:NCBI gene;Acc:101163677]                                                                     | 6.371220288 | 0.425411097  | -0.656421662 | -0.110129021 |
| ENSORL000000012193  | h2p21             | H. h2p21 [Source:ZFIN;Acc:ZDB-GENE-080104-3]                                                                                | 5.458998187 | 2.156818738  | -2.472581878 | 0.830138169  |
| ENSORL000000010150  | galactn3          | galactin-5 [Source:NCBI gene;Acc:101159056]                                                                                 | 5.20745305  | 1.278895204  | -1.396315212 | 2.53277681   |
| ENSORL000000015554  | si.ch73-194h1     | si.ch73-194h1 [Source:ZFIN;Acc:ZDB-GENE-100921-21]                                                                          | 4.482579946 | -0.70249007  | -2.726760978 | 2.458752238  |
| ENSORL000000017515  | run3              | run1-related transcription factor 3 [Source:ZFIN;Acc:ZDB-GENE-000605-2]                                                     | 5.618973655 | 1.525673375  | -3.35534071  | 0.738443549  |
| ENSORL000000003147  | -                 | -                                                                                                                           | 3.559512614 | 0.541956992  | -0.077095519 | 2.940844593  |
| ENSORL000000014612  | hst11b            | extended synaptotagmin-like protein 1b [Source:ZFIN;Acc:ZDB-GENE-040724-209]                                                | 3.912731528 | 1.894463529  | 0.456184915  | 2.474938166  |
| ENSORL000000002994  | mc2r              | melanin 2 [Source:ZFIN;Acc:ZDB-GENE-090220-1]                                                                               | 4.509248402 | 1.22432178   | -0.503557608 | 2.781851683  |
| ENSORL000000013440  | prnc1b            | paired related homeobox 1 [Source:NCBI gene;Acc:101166213]                                                                  | 4.504800212 | -0.5522155   | -2.751966377 | 2.305344644  |
| ENSORL000000013521  | -                 | -                                                                                                                           | 5.243751593 | 1.573653914  | -0.911488581 | 2.75087098   |
| ENSORL000000013408  | psme2             | proteasome activator subunit 2 [Source:NCBI gene;Acc:101173098]                                                             | 3.197932359 | 0.955875352  | -0.201855335 | 2.040686529  |
| ENSORL000000010892  | lsta              | folistatin a [Source:ZFIN;Acc:ZDB-GENE-990714-11]                                                                           | 4.934460661 | 2.076347304  | -1.860083159 | 0.998516506  |
| ENSORL000000007450  | arx               | Cy28c brainless aristaless related homeobox (arx), mRNA [Source:RefSeq; mRNA;Acc:NM_001122913]                              | 3.134725199 | 1.993420166  | -1.916728399 | -0.77498186  |
| ENSORL000000013739  | -                 | -                                                                                                                           | 3.256801155 | 0.238627563  | -2.221222574 | 0.797536156  |
| ENSORL000000013822  | si.ch211-225h     | si.ch211-225h [Source:ZFIN;Acc:ZDB-GENE-030131-1981]                                                                        | 3.258319154 | 1.684133074  | 0.02018535   | 1.594836222  |
| ENSORL000000004146  | -                 | -                                                                                                                           | 6.011650957 | -0.451538831 | -5.697302602 | 0.766372093  |

|                    |                 |                                                                                                              |             |              |              |              |
|--------------------|-----------------|--------------------------------------------------------------------------------------------------------------|-------------|--------------|--------------|--------------|
| ENSORLG0000000257  | slc4a1a         | solute carrier family 4 (anion exchanger), member 1a (Diego blood group) [Source:ZFIN;Acc:ZDB-GENE-010525-1] | 5.024556219 | -1.610585595 | -4.617222042 | 2.018405838  |
| ENSORLG00000013949 | PTPNC1          | phosphatidylinositol transfer protein cytoplasmic 1 [Source:HGNC Symbol;Acc:HGNC:21045]                      | 5.173751762 | 2.790767172  | -1.21001089  | 1.173457086  |
| ENSORLG00000008095 | aps8b1b         | aps8b1b [Source:ZFIN;Acc:ZDB-GENE-050506-143]                                                                | 3.358438302 | -1.111292019 | -1.870767043 | 2.58744543   |
| ENSORLG00000003115 | phospho1a       | phosphatase, orphan 1 [Source:ZFIN;Acc:ZDB-GENE-040801-198]                                                  | 6.953604677 | 2.685135902  | -5.001234682 | -0.732281836 |
| ENSORLG00000011891 | -               | -                                                                                                            | 3.140516747 | 1.404616474  | -0.406651728 | 1.495739688  |
| ENSORLG00000000252 | -               | -                                                                                                            | 5.247543991 | 1.645855151  | -2.27302165  | 3.74871654   |
| ENSORLG00000004040 | -               | -                                                                                                            | 4.245777377 | -0.82116448  | -4.599658687 | 0.467767901  |
| ENSORLG00000002977 | mk2a            | MK2/myocardin-like 2a [Source:ZFIN;Acc:ZDB-GENE-135331-36]                                                   | 3.421997524 | 0.579613337  | -1.365118753 | 1.477750475  |
| ENSORLG00000000531 | sl00a10b        | protein sl00a10 [Source:NCBI gene;Acc:101155699]                                                             | 5.901841074 | 1.73534751   | -2.525914254 | 1.641064156  |
| ENSORLG00000010277 | crabp2a         | cellular retinoic acid binding protein 2, a [Source:ZFIN;Acc:ZDB-GENE-030320-4]                              | 3.295020498 | 2.053887887  | -1.317520881 | -0.075903096 |
| ENSORLG00000012969 | nt5c2b          | 5'-nucleotidase, cytosolic 1b [Source:ZFIN;Acc:ZDB-GENE-061013-522]                                          | 4.477122359 | 1.499895086  | -0.857568079 | 2.120144098  |
| ENSORLG00000017666 | ara2            | aromatase [Source:ZFIN;Acc:ZDB-GENE-141216-238]                                                              | 5.583421324 | 1.431049874  | -3.97470688  | 0.188148878  |
| ENSORLG00000013861 | snai1a          | snail family zinc finger 1a [Source:ZFIN;Acc:ZDB-GENE-990415-255]                                            | 5.193969887 | 3.040282133  | -2.467530986 | -0.31335818  |
| ENSORLG00000013801 | gprc5c          | G protein-coupled receptor, class C, group 5, member C [Source:ZFIN;Acc:ZDB-GENE-070929-27]                  | 6.303697649 | 0.280613501  | -3.513205747 | 2.510361839  |
| ENSORLG00000008111 | slc46a1         | solute carrier family 46 member 1 [Source:NCBI gene;Acc:101170694]                                           | 4.501814614 | -0.176228759 | -0.807631685 | 3.870896797  |
| ENSORLG00000011179 | zch6            | zinc finger CCH-type containing 6 [Source:ZFIN;Acc:ZDB-GENE-120727-18]                                       | 3.436620712 | 1.039356745  | -0.147336639 | 2.250411654  |
| ENSORLG00000014679 | myct1a          | myc target 1a [Source:ZFIN;Acc:ZDB-GENE-041001-]                                                             | 3.22242056  | 0.83731284   | -1.09661841  | 1.2886887177 |
| ENSORLG00000008674 | clornf9         | Cl3 and TNF-related 9 [Source:ZFIN;Acc:ZDB-GENE-080303-33]                                                   | 1.705716297 | -            | -17.05715778 | 0            |
| ENSORLG00000015708 | slc10e2         | complement C1q-like protein 4 [Source:NCBI gene;Acc:101185854]                                               | 5.73357242  | 2.523182233  | -3.942179483 | -0.731301938 |
| ENSORLG00000002966 | f8              | coagulation factor VIII, procoagulant component [Source:ZFIN;Acc:ZDB-GENE-090629-2]                          | 3.594806492 | 1.554058612  | -0.004908389 | 2.036233909  |
| ENSORLG00000010362 | nrarpa          | NOTCH regulated ankyrin repeat protein [Source:NCBI gene;Acc:11344263]                                       | 3.301281354 | 1.188567687  | -0.571766914 | 1.541411094  |
| ENSORLG00000008010 | -               | -                                                                                                            | 17.3258941  | 10.40590729  | -5.582361985 | 1.33806095   |
| ENSORLG00000003765 | rorca           | RAR-related orphan receptor C a [Source:ZFIN;Acc:ZDB-GENE-990415-250]                                        | 4.192207555 | 0.844314263  | -2.152810866 | 1.195565299  |
| ENSORLG00000012328 | slc10e2         | slc10e2-4e7.3 [Source:ZFIN;Acc:ZDB-GENE-070912-542]                                                          | 4.062640886 | 1.387250951  | -0.271651355 | 2.404223674  |
| ENSORLG00000010231 | G0S2            | G0S2 switch 2 [Source:NCBI gene;Acc:101156888]                                                               | 5.463242254 | -0.523011966 | -5.501655431 | 0.485083973  |
| ENSORLG00000009983 | slc15a2         | solute carrier family 15 (oligosaccharide transporter), member 2 [Source:ZFIN;Acc:ZDB-GENE-030131-5866]      | 5.057322225 | 1.274697482  | -3.374659158 | 0.408450788  |
| ENSORLG00000008502 | RARB            | retinoic acid receptor beta [Source:HGNC Symbol;Acc:HGNC:5865]                                               | 4.939312346 | 3.000879595  | -2.866926637 | -0.929688593 |
| ENSORLG00000017312 | coll12a1a       | collagen, type XII, alpha 1a [Source:ZFIN;Acc:ZDB-GENE-090728-1]                                             | 3.071353457 | 1.98188703   | -2.997626513 | -1.907675031 |
| ENSORLG00000012894 | apbb3           | amyloid beta (A4) precursor protein-binding, family B, member 3 [Source:ZFIN;Acc:ZDB-GENE-140106-53]         | 3.256804997 | 1.675017188  | -1.08050548  | 0.501727283  |
| ENSORLG00000007430 | tmem204         | transmembrane protein 204 [Source:NCBI gene;Acc:101162065]                                                   | 4.426007512 | 1.854343096  | -2.39647291  | 0.175676264  |
| ENSORLG00000017556 | zfp113337       | zfp113337 [Source:ZFIN;Acc:ZDB-GENE-050306-20]                                                               | 7.502366103 | 3.750551067  | -2.104094545 | 1.748219999  |
| ENSORLG00000017667 | gata6           | GATA binding protein 6 [Source:NCBI gene;Acc:101159296]                                                      | 3.572710785 | 1.793673515  | -0.950929286 | 0.82852911   |
| ENSORLG00000015230 | slc10e2         | slc10e2-159a18.1 [Source:ZFIN;Acc:ZDB-GENE-041210-204]                                                       | 5.922953339 | 2.014676145  | -0.248656867 | 3.660104587  |
| ENSORLG00000000689 | HKI (1 of many) | hexokinase 1 [Source:NCBI gene;Acc:101157031]                                                                | 3.82173896  | 2.45849502   | -1.143788272 | 0.222581829  |
| ENSORLG00000011031 | -               | -                                                                                                            | 5.297885953 | 2.21792509   | -2.370514258 | 1.288935671  |
| ENSORLG00000009269 | abcd4           | ATP-binding cassette, sub-family B (MDR/TAP), member 4 [Source:ZFIN;Acc:ZDB-GENE-080204-50]                  | 3.681476511 | -0.884908069 | -2.913708245 | 1.652333857  |
| ENSORLG00000009051 | oxcl12a         | oligosaccharide core 1-derived factor 1 [Source:ZFIN;Acc:ZDB-GENE-030318-]                                   | 4.416944113 | 1.957916649  | -2.95954791  | -0.500035509 |
| ENSORLG00000010189 | cdgflr1         | platelet derived growth factor receptor like [Source:NCBI gene;Acc:101165739]                                | 5.579981562 | -1.295697799 | -5.173881386 | 1.70229317   |
| ENSORLG00000003554 | hntp1b          | hormon binding protein 1b [Source:ZFIN;Acc:ZDB-GENE-091117-61]                                               | 3.382267829 | 1.442548161  | 0.659065786  | 2.599270279  |
| ENSORLG00000004253 | -               | -                                                                                                            | 6.846993847 | 1.022954516  | -5.84048149  | -0.015961426 |
| ENSORLG00000017187 | -               | -                                                                                                            | 4.771748489 | -12.47916891 | -5.769103159 | 11.48232395  |
| ENSORLG00000010042 | agtr1b          | angiotensin II receptor, type 1b [Source:ZFIN;Acc:ZDB-GENE-110411-117]                                       | 3.756930834 | 0.816916552  | -1.334835165 | 1.605666065  |
| ENSORLG00000000773 | slc10e2         | slc10e2-23414.3 [Source:ZFIN;Acc:ZDB-GENE-131121-422]                                                        | 16.68214544 | 13.58744235  | -0.179295701 | 2.915874164  |
| ENSORLG00000016860 | slc10e2         | slc10e2-251b [Source:NCBI gene;Acc:101161898]                                                                | 4.435400224 | 1.8054466    | -2.685170002 | -0.054731382 |
| ENSORLG00000000660 | brsk2b          | BR serine/threonine kinase 2b [Source:ZFIN;Acc:ZDB-GENE-100422-3]                                            | 4.990533541 | 1.046711888  | -1.392731658 | 2.551576918  |
| ENSORLG00000006436 | -               | -                                                                                                            | 3.188918896 | 0.762301594  | -2.801719719 | -0.394618029 |
| ENSORLG00000007024 | -               | -                                                                                                            | 3.827123773 | 0.572426506  | -1.3724814   | 1.885698848  |
| ENSORLG00000011866 | cerk            | ceramide kinase [Source:ZFIN;Acc:ZDB-GENE-041210-210]                                                        | 4.805589893 | 1.53438212   | -0.464387364 | 2.807305373  |
| ENSORLG00000001411 | -               | -                                                                                                            | 3.075692745 | -0.467022515 | -2.176488644 | 1.416731224  |
| ENSORLG00000010169 | runx2b          | runx-related transcription factor 2b [Source:ZFIN;Acc:ZDB-GENE-040629-4]                                     | 6.088456442 | 2.263313281  | -1.558298862 | 2.267337601  |
| ENSORLG00000016832 | -               | -                                                                                                            | 4.681775423 | 2.455211748  | 0.235868253  | 2.462916678  |
| ENSORLG00000004731 | -               | -                                                                                                            | 15.89803495 | 9.994692855  | -5.581066636 | 3.22739529   |
| ENSORLG00000000391 | zfp138461       | zfp138461 [Source:NCBI gene;Acc:101161898]                                                                   | 7.267886421 | 1.455982041  | -6.70146617  | -0.888038864 |
| ENSORLG00000004610 | zfp330a         | cyclic AMP-responsive element-binding protein 3-like protein 3-A [Source:NCBI gene;Acc:101171479]            | 5.499380209 | 1.824464451  | -1.479175471 | 2.196228957  |
| ENSORLG00000011102 | -               | -                                                                                                            | 4.848298521 | 2.100451193  | -0.991884744 | 1.754447055  |
| ENSORLG00000006725 | -               | -                                                                                                            | 3.224772899 | 0.173797967  | -2.626302063 | 0.425157228  |
| ENSORLG00000016341 | -               | -                                                                                                            | 3.034207641 | 0.337703999  | -0.704757396 | 1.992235962  |
| ENSORLG00000006891 | -               | -                                                                                                            | 3.984935857 | 0.844703585  | -1.55484795  | 1.55484795   |
| ENSORLG00000005362 | -               | -                                                                                                            | 3.95269544  | 2.775203198  | -0.358067317 | 0.827484433  |
| ENSORLG00000004515 | -               | -                                                                                                            | 4.831097364 | 1.425215112  | -0.476203093 | 2.830146081  |
| ENSORLG00000012369 | -               | -                                                                                                            | 3.835289694 | 2.242823701  | -1.273388951 | 0.373889551  |
| ENSORLG00000009734 | plek2           | plekstrin 2 [Source:ZFIN;Acc:ZDB-GENE-080219-2]                                                              | 5.475782685 | 1.61351398   | -2.150718099 | 1.712031276  |
| ENSORLG00000006646 | psmt8a          | proteasome subunit beta 8a [Source:ZFIN;Acc:ZDB-GENE-990415-140]                                             | 5.275748857 | 2.01778881   | -1.469128831 | 1.789316341  |
| ENSORLG00000000918 | efl1            | E74-like E12 transcription factor 1 [Source:ZFIN;Acc:ZDB-GENE-980526-335]                                    | 3.762036728 | 0.588745586  | -2.935620538 | 0.238156135  |
| ENSORLG00000005755 | rspo3           | Oryzias latipes R-scordin 3 (rspo3), mRNA [Source:RefSeq mRNA;Acc:NM_00129248]                               | 5.94472652  | 0.765571189  | -2.686708295 | 2.492390307  |
| ENSORLG00000016855 | SKI             | SKI proto-oncogene [Source:HGNC Symbol;Acc:HGNC:10896]                                                       | 4.741702179 | 1.761105162  | -2.605393482 | 0.375687946  |
| ENSORLG00000006683 | gpm1b           | G protein signaling modulator 1b [Source:ZFIN;Acc:ZDB-GENE-1110203-5]                                        | 3.343503217 | 1.524679768  | 0.846919044  | 2.66622704   |
| ENSORLG00000011745 | rfl0            | interferon regulatory factor 10 [Source:ZFIN;Acc:ZDB-GENE-040426-2084]                                       | 4.79451194  | 1.696512976  | -1.545584877 | 1.552898416  |
| ENSORLG00000002861 | -               | -                                                                                                            | 4.593195724 | 0.948319352  | -4.543617479 | -0.899256571 |
| ENSORLG00000000238 | -               | -                                                                                                            | 5.079468459 | 0.158824428  | -2.703811055 | 2.217318856  |
| ENSORLG00000012812 | -               | -                                                                                                            | 3.267478224 | 2.020316272  | -0.226395234 | 1.02125155   |
| ENSORLG00000009338 | slc2h211-161h   | uncharacterized LOC101165601 [Source:NCBI gene;Acc:101165601]                                                | 4.579047917 | 1.200274393  | -0.465883123 | 2.913427116  |
| ENSORLG00000000349 | slc2h211-762h   | uncharacterized LOC101172412 [Source:NCBI gene;Acc:101172412]                                                | 5.300496198 | 0.401587774  | -3.416653362 | 1.482738568  |

|                      |                  |                                                                                                                |             |              |              |              |
|----------------------|------------------|----------------------------------------------------------------------------------------------------------------|-------------|--------------|--------------|--------------|
| ENSORLG00000005490   | KLF5             | Kruppel like factor 5 [Source:HGNC Symbol;Acc:HGNC:6349]                                                       | 4.739686663 | 0.97211995   | -2.22486963  | 1.543194199  |
| ENSORLG00000008664   | ZNF503 (1 of 2)  | zinc finger protein 503 [Source:NCBI gene;Acc:101155151]                                                       | 4.391903561 | 1.271804088  | -2.528719757 | 0.591863384  |
| ENSORLG00000007251   | twtst1           | Oryzias latipes twist family bHLH transcription factor 1 (twist1, mRNA, [Source:RefSeq mRNA;Acc:NM_001104707]) | 5.349524748 | 0.37404307   | -2.672716532 | 2.303250607  |
| ENSORLG000000015327  | pip5k1ca         | phosphatidylinositol-4-phosphate 5-kinase, type 1 gamma 4 [Source:ZFIN;Acc:ZDB-GENE-050208-388]                | 4.617531578 | 2.356365741  | 0.447068071  | 2.708717143  |
| ENSORLG000000011369  | sparc            | secreted protein acidic and cysteine rich [Source:NCBI gene;Acc:100049536]                                     | 4.578540522 | 2.659840421  | -0.827896143 | 1.09129898   |
| ENSORLG000000017784  | placr1           | PI-ACB, like 1 [Source:ZFIN;Acc:ZDB-GENE-091204-165]                                                           | 3.064207778 | -0.542527987 | -1.177751907 | 1.828014201  |
| ENSORLG00000001590   | placr1           | PI-ACB, like 1 [Source:ZFIN;Acc:ZDB-GENE-091204-165]                                                           | 5.244071442 | 0.65499618   | -2.083193107 | 2.526403074  |
| ENSORLG00000001285   | uroc1            | urocanate hydratase 1 [Source:NCBI gene;Acc:101174658]                                                         | 7.582490988 | 3.186387252  | -1.614484687 | 2.782124701  |
| ENSORLG000000011278  | -                | -                                                                                                              | 3.514323938 | 1.260681224  | 0.472744218  | 2.728870975  |
| ENSORLG000000017340  | sidkey-121j17    | sidkey-121j17.5 [Source:ZFIN;Acc:ZDB-GENE-030131-4745]                                                         | 3.254402234 | -0.366908066 | -1.008932919 | 2.612861276  |
| ENSORLG000000013335  | RF9              | interferon regulatory factor 9 [Source:HGNC Symbol;Acc:HGNC:61311]                                             | 4.062769782 | 1.163002195  | -1.669244948 | 1.231007208  |
| ENSORLG00000001780   | sox2             | SOX3 protein [Source:NCBI gene;Acc:1000493268]                                                                 | 5.234865826 | 0.754818193  | -1.787379463 | 2.693189614  |
| ENSORLG000000005823  | -                | complement factor properdin [Source:NCBI gene;Acc:101154973]                                                   | 3.565965848 | 2.310200627  | -2.521177729 | -1.264927499 |
| ENSORLG000000010261  | -                | -                                                                                                              | 3.906016995 | 2.447579044  | -0.092731977 | 1.366191783  |
| ENSORLG000000017415  | matk             | megakaryocyte-associated tyrosine kinase [Source:ZFIN;Acc:ZDB-GENE-070705-183]                                 | 3.632150066 | 1.24723067   | -1.769519762 | 0.615898974  |
| ENSORLG000000009298  | elk3 (1 of many) | ELK3, ETS-domain protein [Source:ZFIN;Acc:ZDB-GENE-030716-2]                                                   | 5.193897557 | 1.226375057  | -1.997980925 | 1.970024763  |
| ENSORLG000000007167  | brd2             | bromodomain-related gene family, member 2 [Source:ZFIN;Acc:ZDB-GENE-060825-228]                                | 3.775009111 | -2.486128329 | -1.444659725 | 4.816959833  |
| ENSORLG000000002183  | mbnl3            | muscleblind-like splicing regulator 3 [Source:ZFIN;Acc:ZDB-GENE-081002-3]                                      | 4.321189872 | 1.178186321  | -0.219588168 | 2.923950296  |
| ENSORLG000000000410  | shp2             | calcium- and phosphoinositide 3-kinase-dependent protein 2 [Source:ZFIN;Acc:ZDB-GENE-030131-5810]              | 6.657802245 | 2.015251353  | -3.619323988 | 1.03401007   |
| ENSORLG000000016232  | -                | -                                                                                                              | 18.59602758 | 13.59643787  | -1.186133429 | 1.787723788  |
| ENSORLG000000002876  | -                | claudin 5 [Source:NCBI gene;Acc:101173553]                                                                     | 4.72163541  | 1.842338364  | -3.355748833 | 2.07032411   |
| ENSORLG000000002819  | -                | -                                                                                                              | 4.041288356 | -0.129182608 | -2.410665004 | 1.760392624  |
| ENSORLG000000012806  | orb-62m          | b2 microglobulin [Source:NCBI gene;Acc:100049185]                                                              | 5.728197733 | 1.740978843  | -2.121743518 | 1.86659394   |
| ENSORLG000000002927  | -                | -                                                                                                              | 3.92725318  | -0.9344375   | -1.95019819  | 3.76349012   |
| ENSORLG000000006556  | korc1            | vitamin K epoxide reductase complex, subunit 1 [Source:ZFIN;Acc:ZDB-GENE-030131-2886]                          | 3.014390309 | 1.295903831  | -0.068941897 | 1.650029462  |
| ENSORLG000000014973  | htra1b           | HtrA serine peptidase 1 [Source:NCBI gene;Acc:101160199]                                                       | 3.046161904 | -0.318602883 | -2.188626527 | 1.176623381  |
| ENSORLG000000009151  | -                | -                                                                                                              | 3.403306831 | 0.452807012  | -0.655442315 | 2.295542588  |
| ENSORLG000000018161  | qor132b          | G protein-coupled receptor 132b [Source:ZFIN;Acc:ZDB-GENE-040724-83]                                           | 3.86122824  | -1.574739083 | -1.081115696 | 3.880229519  |
| ENSORLG000000014919  | -                | -                                                                                                              | 4.277547335 | 3.613655117  | -0.52120362  | 0.143170419  |
| ENSORLG000000011273  | col1a1b          | collagen, type I, alpha 1b [Source:ZFIN;Acc:ZDB-GENE-030131-4400]                                              | 5.261473093 | 2.067714767  | -4.033065645 | -0.840822291 |
| ENSORLG000000015981  | myf1             | myosin light chain 1, skeletal muscle isoform [Source:NCBI gene;Acc:101167500]                                 | 3.741705665 | 0.234810104  | -0.641508833 | -2.53412596  |
| ENSORLG000000012809  | -                | -                                                                                                              | 3.004525253 | 2.27151341   | -0.634767113 | 0.148771966  |
| ENSORLG000000012247  | -                | -                                                                                                              | 3.897895921 | 1.294431062  | -1.297318769 | 1.306584607  |
| ENSORLG000000004735  | lmo2             | LIM domain only 2 (rhombotin-like 1) [Source:ZFIN;Acc:ZDB-GENE-980526-419]                                     | 6.360719907 | 1.6588261    | -2.611094617 | 2.09128562   |
| ENSORLG000000005705  | -                | -                                                                                                              | 4.036248302 | 1.850103807  | -1.907489422 | 0.279139881  |
| ENSORLG0000000021759 | -                | -                                                                                                              | 4.511827187 | 1.170090733  | -1.119041108 | 2.223179001  |
| ENSORLG000000018031  | cci25a           | C-C motif chemokine 20 [Source:NCBI gene;Acc:101171112]                                                        | 6.133030914 | 0.121987856  | -3.097421901 | 2.914384299  |
| ENSORLG000000012671  | -                | -                                                                                                              | 4.333612814 | 2.933506588  | -2.091568536 | -0.690977701 |
| ENSORLG000000017352  | qsox1            | quiescent Q6 sulfhydryl oxidase 1 [Source:ZFIN;Acc:ZDB-GENE-030131-7018]                                       | 16.14661044 | 14.21062341  | -3.261693401 | -0.425239222 |
| ENSORLG000000016549  | mob3c            | MOB kinase activator 3C [Source:ZFIN;Acc:ZDB-GENE-040704-32]                                                   | 3.895399488 | 3.055027698  | 0.61370594   | 1.454561428  |
| ENSORLG000000005216  | scad8            | scp1-CoA dehydrogenase family member 8 [Source:NCBI gene;Acc:101188062]                                        | 3.81868258  | 1.17720354   | -0.721058737 | 1.920905778  |
| ENSORLG000000009017  | -                | beta-crystallin B3-like [Source:NCBI gene;Acc:10111323]                                                        | 6.794531982 | 0.552418671  | -5.764708255 | 0.47789539   |
| ENSORLG000000004090  | cdk6             | cyclin dependent kinase 6 [Source:NCBI gene;Acc:101168879]                                                     | 4.298889946 | 1.814508873  | -0.765262986 | 1.719701891  |
| ENSORLG000000010944  | ctnnd1           | catenin (cadherin-associated protein), delta 1 [Source:ZFIN;Acc:ZDB-GENE-110208-9]                             | 4.771913785 | 0.406361697  | -1.64118629  | 2.724850316  |
| ENSORLG000000013127  | meis2a           | Meis homeobox 2 [Source:NCBI gene;Acc:101174873]                                                               | 5.164361882 | 1.783370116  | -2.416098628 | 0.96539669   |
| ENSORLG000000015959  | -                | -                                                                                                              | 6.149707589 | 3.394693681  | -1.227411649 | 1.528086890  |
| ENSORLG000000014886  | rorcb            | RAR-related orphan receptor c b [Source:ZFIN;Acc:ZDB-GENE-040724-215]                                          | 4.637352788 | 1.983920376  | -1.751351346 | 0.90256572   |
| ENSORLG000000004418  | ppp1r9a          | protein phosphatase 1, regulatory subunit 9A [Source:ZFIN;Acc:ZDB-GENE-060503-860]                             | 5.276035028 | 2.328787263  | -0.226885996 | 0.920848235  |
| ENSORLG000000003750  | arag             | arylsulfatase G [Source:ZFIN;Acc:ZDB-GENE-060503-154]                                                          | 4.960256697 | 2.956954072  | 0.067968117  | 2.071752221  |
| ENSORLG000000017047  | PLD4             | phospholipase D family member 4 [Source:HGNC Symbol;Acc:HGNC:23782]                                            | 4.776842794 | 2.698788288  | -0.925247093 | 1.152392515  |
| ENSORLG000000003559  | slc43a1a         | transporter, member 1a [Source:ZFIN;Acc:ZDB-GENE-040724-215]                                                   | 5.891831357 | 1.80827994   | -1.174980713 | 2.909126813  |
| ENSORLG000000016195  | zfp395b          | zinc finger protein 395b [Source:ZFIN;Acc:ZDB-GENE-041001-193]                                                 | 4.055800027 | 1.987441598  | 0.24254988   | 2.311393955  |
| ENSORLG000000003794  | -                | -                                                                                                              | 5.179715207 | 2.303655528  | -0.9229684   | 1.953577947  |
| ENSORLG000000003975  | kbtbp10a         | KF506 binding protein 10a [Source:ZFIN;Acc:ZDB-GENE-100821-75]                                                 | 3.601697969 | 1.713736805  | 0.671598918  | 2.560045202  |
| ENSORLG000000013155  | trif1            | trifles homolog 1 [Source:NCBI gene;Acc:101160746]                                                             | 3.127169475 | 1.240760688  | -2.947121403 | -1.260277629 |
| ENSORLG000000012333  | amot             | angiostatin [Source:ZFIN;Acc:ZDB-GENE-030131-7487]                                                             | 5.102658631 | 0.48881083   | -4.134853101 | 0.448314722  |
| ENSORLG000000005412  | amot             | angiostatin [Source:ZFIN;Acc:ZDB-GENE-030131-7487]                                                             | 4.943021988 | 2.208813139  | -0.607425109 | 2.127268794  |
| ENSORLG000000003973  | kaznb            | kazrin, nephlakin interacting protein b [Source:ZFIN;Acc:ZDB-GENE-030215-31]                                   | 4.774961392 | 1.574948892  | -1.374959228 | 1.825496866  |
| ENSORLG000000008798  | KCNMA1 (1 of 2)  | potassium calcium-activated channel subfamily M alpha 1 [Source:HGNC Symbol;Acc:HGNC:6284]                     | 3.078494984 | 0.510292922  | -1.362591304 | 1.206088842  |
| ENSORLG000000003021  | st8a6            | Oryzias latipes alpha-2,8-sialyltransferase ST8sial VI (st8a6), mRNA, [Source:RefSeq mRNA;Acc:NM_001104905]    | 3.854618967 | 1.8324377    | -1.057446194 | 0.965220237  |
| ENSORLG000000001705  | rtpm             | protein tyrosine phosphatase, receptor type, Nb [Source:ZFIN;Acc:ZDB-GENE-110505-1]                            | 3.183164287 | 0.65660123   | -1.481567798 | 1.046020918  |
| ENSORLG000000016254  | lin7a            | lin-7 homolog A (C. elegans) [Source:ZFIN;Acc:ZDB-GENE-040426-1665]                                            | 3.57378169  | 2.735620097  | -0.099026474 | 0.739619917  |
| ENSORLG000000016820  | -                | uncharacterized LOC101162953 [Source:NCBI gene;Acc:101162953]                                                  | 16.6088462  | 10.56750932  | -3.292620433 | 2.749179261  |
| ENSORLG000000017122  | gata3            | GATA binding protein 3 [Source:ZFIN;Acc:ZDB-GENE-990415-82]                                                    | 4.810897244 | -0.23193759  | -3.171008543 | 1.872312403  |
| ENSORLG000000007186  | bapry            | B-box and SPRY domain containing [Source:ZFIN;Acc:ZDB-GENE-060526-219]                                         | 5.651789462 | 2.109395835  | -2.340262891 | 1.202615416  |
| ENSORLG000000012289  | rsp2             | cysteine and glycine-rich protein 2 [Source:NCBI gene;Acc:10117174]                                            | 5.154242963 | 1.562123761  | -0.634922369 | 2.957881211  |
| ENSORLG000000001162  | -                | -                                                                                                              | 4.089000667 | 2.449974196  | -0.668595988 | 0.979199597  |
| ENSORLG000000006090  | qpl1b            | Spi-1 proto-oncogene b [Source:ZFIN;Acc:ZDB-GENE-980526-164]                                                   | 3.81823343  | 2.74539385   | -1.786545624 | -0.692776488 |
| ENSORLG000000014806  | tbx4             | T-box 4 [Source:NCBI gene;Acc:10117998]                                                                        | 4.092276847 | -0.200671653 | -3.00795521  | 1.285478727  |
| ENSORLG000000014364  | tgaab6           | integrin, alpha 6b [Source:ZFIN;Acc:ZDB-GENE-050320-9]                                                         | 3.724483837 | 1.997393703  | 0.366525393  | 2.094100826  |

|                     |                    |                                                                                                                                                             |              |              |              |              |
|---------------------|--------------------|-------------------------------------------------------------------------------------------------------------------------------------------------------------|--------------|--------------|--------------|--------------|
| ENSORLG0000004392   | sgpe               | sarcoglycan, epsilon [Source:ZFIN;Acc:ZDB-GENE-030724.1]                                                                                                    | 4.036959787  | 1.621053728  | 0.414094462  | 2.830485839  |
| ENSORLG0000005938   | stp2a1             | sarcoplasmic/endoplasmic reticulum calcium ATPase 1 [Source:NCBI;gene:Acc:101171864]                                                                        | 6.334076992  | 0.946001909  | -5.39897999  | -0.010424465 |
| ENSORLG0000004782   | prune2             | prune Homolog 2 (Drosophila) [Source:ZFIN;Acc:ZDB-GENE-050309-222]                                                                                          | 4.843749314  | -0.357482227 | -2.080546291 | 3.121172307  |
| ENSORLG0000009882   | -                  | -                                                                                                                                                           | 3.900904808  | -0.926651306 | -0.865505296 | 3.962533941  |
| ENSORLG00000013049  | -                  | -                                                                                                                                                           | 3.952308967  | 1.613426645  | -0.004562148 | 2.334805161  |
| ENSORLG0000004588   | sl:dkey-28n18      | sortilin domain 4 [Source:NCBI;gene:Acc:101168453]                                                                                                          | 3.326286513  | 0.66128161   | 0.127170882  | 2.790662534  |
| ENSORLG0000003323   | hepb               | heparanase B (beta polyoptictide) [Source:ZFIN;Acc:ZDB-GENE-030131-2333]                                                                                    | 3.102809433  | 0.342108176  | -2.249213333 | 0.511972886  |
| ENSORLG00000013892  | ankrd13b           | ankyrin repeat domain 13B [Source:ZFIN;Acc:ZDB-GENE-050913-151]                                                                                             | 5.085955187  | 0.879568415  | -1.218136556 | 2.988644864  |
| ENSORLG00000002735  | ahbg2a             | ATP-binding cassette, sub-family G (WHITE), member 2a [Source:ZFIN;Acc:ZDB-GENE-050517-35]                                                                  | 4.371119333  | 0.258495174  | -2.271084943 | 1.842024295  |
| ENSORLG00000000021  | -                  | -                                                                                                                                                           | 3.268035518  | 1.44254963   | 0.408649457  | 2.230620738  |
| ENSORLG00000007327  | galnt18b           | polypeptide N-acetylglucosaminyltransferase 18 [Source:NCBI;gene:Acc:101158340]                                                                             | 4.026517422  | 2.565917989  | -0.152517582 | 1.308566054  |
| ENSORLG00000010857  | ddr2b              | discoidin domain receptor tyrosine kinase 2b [Source:ZFIN;Acc:ZDB-GENE-060503-361]                                                                          | 4.491963934  | 2.277485872  | 0.297544225  | 2.51251003   |
| ENSORLG00000012927  | -                  | -                                                                                                                                                           | 3.38045259   | 0.534166688  | -1.264938467 | 1.581831287  |
| ENSORLG00000012710  | -                  | -                                                                                                                                                           | 4.394858138  | 0.735636703  | -1.867550082 | 1.790598879  |
| ENSORLG00000006370  | tead3b             | TEA domain family member 3 b [Source:ZFIN;Acc:ZDB-GENE-080103-3]                                                                                            | 3.065954236  | 1.294854425  | 0.712136004  | 2.483720417  |
| ENSORLG00000017995  | lox5b              | lysyl oxidase-like 5b [Source:ZFIN;Acc:ZDB-GENE-070818-3]                                                                                                   | 6.553391427  | 0.749386998  | -1.231638797 | 4.572859393  |
| ENSORLG00000011645  | mid1ip1a           | MID1 interacting protein 1a [Source:ZFIN;Acc:ZDB-GENE-990415-81]                                                                                            | 3.786683829  | 0.049036758  | -1.739111963 | 1.999200033  |
| ENSORLG00000012805  | pck1               | phosphoenolpyruvate carboxylase 1 (soluble) [Source:ZFIN;Acc:ZDB-GENE-030909-11]                                                                            | 6.753236345  | 0.122523888  | -5.559201607 | 1.071995765  |
| ENSORLG00000009349  | mrx1 (1 of m)      | myeloperoxidase specific peroxidase [Source:ZFIN;Acc:ZDB-GENE-030131-3460]                                                                                  | 4.512336412  | 1.331772347  | -3.186009127 | -0.004959971 |
| ENSORLG00000012238  | kat2b              | Klvs10 acetyltransferase 2B [Source:ZFIN;Acc:ZDB-GENE-060503-207]                                                                                           | 3.81760459   | 2.17754179   | 0.068151907  | 1.708701109  |
| ENSORLG000000009715 | slc3a2a            | solute carrier family 3 (anion exchanger system 1 transporter), member 2a [Source:ZFIN;Acc:ZDB-GENE-sl:ch211-18h17.2 [Source:ZFIN;Acc:ZDB-GENE-030131-5404] | 4.166239629  | 1.995254582  | -0.363502204 | 1.80796772   |
| ENSORLG00000004406  | sl:ch211-18h17     | -                                                                                                                                                           | 3.37380799   | 0.345311706  | -2.475087659 | 0.553893421  |
| ENSORLG00000011021  | SLC49A3            | solute carrier family 49 member 3 [Source:NCBI;gene:Acc:101171677]                                                                                          | 5.108174942  | 1.685635017  | -1.10908317  | 2.313941721  |
| ENSORLG000000101737 | ENSORLG00000006980 | notch3 [Source:ZFIN;Acc:ZDB-GENE-000329-5]                                                                                                                  | 5.759183719  | 3.05848572   | -3.384142906 | -0.689357787 |
| ENSORLG00000006659  | bcl6b              | B-cell CLL/lymphoma 6, member B [Source:ZFIN;Acc:ZDB-GENE-120907-11]                                                                                        | 4.035487747  | 2.074238897  | -1.434739788 | 0.498004001  |
| ENSORLG00000000459  | nccrp1             | non-specific cytotoxic cell receptor protein 1 homolog (zebrafish) [Source:NCBI;gene:Acc:101166487]                                                         | 3.82390573   | 1.450987244  | -1.891319991 | 0.482082921  |
| ENSORLG00000006006  | -                  | -                                                                                                                                                           | 4.107951541  | -1.931448474 | -3.114625966 | 2.925261863  |
| ENSORLG00000005142  | -                  | -                                                                                                                                                           | 5.1661575    | 3.667238441  | -1.78544579  | -0.286035567 |
| ENSORLG00000016636  | igfbp6b            | insulin-like growth factor-binding protein 5 [Source:NCBI;gene:Acc:101169782]                                                                               | 3.143474343  | 0.744389205  | -1.065242471 | 1.314327728  |
| ENSORLG00000006827  | zgc:194312         | zgc:194312 [Source:ZFIN;Acc:ZDB-GENE-081022-102]                                                                                                            | 4.316242827  | 1.579994012  | -3.48028262  | -0.743550147 |
| ENSORLG00000011742  | rasp1              | Ras interacting protein 1 [Source:ZFIN;Acc:ZDB-GENE-120403-3]                                                                                               | 3.815985015  | 2.981649441  | 0.3154835    | 1.150305523  |
| ENSORLG00000009915  | -                  | -                                                                                                                                                           | 5.458908775  | 1.008173109  | -1.62878722  | 2.822433374  |
| ENSORLG00000014723  | ppdpfa             | pancreatic progenitor cell differentiation and proliferation factor a [Source:ZFIN;Acc:ZDB-GENE-030219-204]                                                 | 6.120828034  | 1.833159834  | -4.406748347 | -0.11895948  |
| ENSORLG00000013711  | RX5                | retinoids homeobox 5 [Source:HGN;Symbol;Acc:HGN:14351]                                                                                                      | 3.017234182  | 2.32440747   | -1.759076061 | -1.065764858 |
| ENSORLG00000006415  | -                  | -                                                                                                                                                           | 18.628660427 | 10.96657755  | -4.684206265 | 7.966638817  |
| ENSORLG00000013711  | -                  | -                                                                                                                                                           | 3.407733828  | 1.357465311  | -0.363916139 | 1.686821366  |
| ENSORLG00000010410  | sh3bgr1            | SH3 domain binding glutamate-rich protein like [Source:ZFIN;Acc:ZDB-GENE-040426-1376]                                                                       | 3.13928051   | 2.314524306  | 0.588396355  | 1.413637628  |
| ENSORLG00000005102  | col2a1a            | Oryzias latipes collagen type II A (col2a1a), mRNA [Source:RefSeq; mRNA; Acc:NM_0248659]                                                                    | 3.178352637  | 2.231170855  | -3.23921704  | -1.381555762 |
| ENSORLG00000009155  | sl:dkey-266m15     | sl:dkey-266m15.5 [Source:ZFIN;Acc:ZDB-GENE-070705-442]                                                                                                      | 4.146502684  | 2.207156711  | -0.331572193 | 1.608258495  |
| ENSORLG00000009052  | ripk3              | receptor-interacting serine-threonine kinase 3 [Source:ZFIN;Acc:ZDB-GENE-071115-4]                                                                          | 5.195706184  | 1.715183967  | -3.500117032 | -0.019110216 |
| ENSORLG00000004432  | PPARG              | peroxisome proliferator activated receptor gamma [Source:HGN;Symbol;Acc:HGN:5238]                                                                           | 4.377478104  | 1.686469184  | -1.683674834 | 1.087819972  |
| ENSORLG00000006954  | trm35-12           | tripeptide motif containing 35-12 [Source:ZFIN;Acc:ZDB-GENE-110920-4]                                                                                       | 6.368519484  | 1.189692574  | -2.984778883 | 2.194535073  |
| ENSORLG00000000981  | slc22a7a           | solute carrier family 22 (organic anion transporter), member 7a [Source:ZFIN;Acc:ZDB-GENE-050506-52]                                                        | 3.616947677  | 0.151243441  | -4.156598965 | -0.690413352 |
| ENSORLG00000003177  | vnt1               | vesicle amine transport 1 [Source:ZFIN;Acc:ZDB-GENE-030616-178]                                                                                             | 4.207450298  | 2.178399427  | -1.19647198  | 0.833118728  |
| ENSORLG00000007485  | znf385a            | zinc finger protein 385A [Source:ZFIN;Acc:ZDB-GENE-090313-255]                                                                                              | 4.486110103  | 1.23448233   | -2.946083137 | 0.306032128  |
| ENSORLG00000006265  | selnmom            | selenoprotein M [Source:ZFIN;Acc:ZDB-GENE-030410-04026-1289]                                                                                                | 4.334653627  | 2.693365285  | -0.152541332 | 1.489231663  |
| ENSORLG00000007736  | pata2a             | GATA-binding factor 2 [Source:NCBI;gene:Acc:101161391]                                                                                                      | 4.710775921  | 0.861396687  | -2.627352534 | 1.22251261   |
| ENSORLG00000014926  | plekhf1            | pleckstrin homology domain containing, family F (with FYVE domain) member 1 [Source:ZFIN;Acc:ZDB-GENE-040408-1289]                                          | 16.10239753  | 0            | -3.045397446 | 13.05749258  |
| ENSORLG00000016885  | GNA11 (1 of m)     | guanine nucleotide-binding protein G(i) subunit alpha [Source:NCBI;gene:Acc:101158934]                                                                      | 3.156453728  | 0.596253215  | -0.83451817  | 1.726167661  |
| ENSORLG00000016641  | casin1             | CASK interacting protein 1 [Source:ZFIN;Acc:ZDB-GENE-071115-3]                                                                                              | 3.696403479  | 1.506267648  | -1.458419389 | 0.730201266  |
| ENSORLG00000006169  | sl:ch211-153b      | sl:ch211-153b23.4 [Source:ZFIN;Acc:ZDB-GENE-030131-7329]                                                                                                    | 3.981379635  | 1.425254123  | -1.525668883 | 0.391083191  |
| ENSORLG00000017370  | -                  | uncharacterized LOC101161631 [Source:NCBI;gene:Acc:101161631]                                                                                               | 5.363740047  | 1.65756761   | -2.792250522 | 0.914408854  |
| ENSORLG00000004290  | MPDZ (1 of m)      | multiple PDZ domain crumbs cell polarity complex component [Source:HGN;Symbol;Acc:HGN:7208]                                                                 | 4.587703993  | 2.391187616  | -0.407685149 | 1.789314738  |
| ENSORLG00000002168  | mylpfa             | myosin light chain, phosphorylatable, fast skeletal muscle a [Source:ZFIN;Acc:ZDB-GENE-990712-15]                                                           | 6.300930238  | 5.02295267   | -10.94037035 | -4.116002128 |
| ENSORLG00000010342  | kif7b              | Kinesin-like factor 7b [Source:ZFIN;Acc:ZDB-GENE-041014-171]                                                                                                | 5.099076035  | 2.578572216  | -0.755830626 | 1.76515472   |
| ENSORLG00000003178  | -                  | -                                                                                                                                                           | 3.606030998  | -0.891619404 | -0.927915421 | 3.570222206  |
| ENSORLG00000014456  | tpia               | tissue factor pathway inhibitor a [Source:ZFIN;Acc:ZDB-GENE-030711-1]                                                                                       | 5.160657701  | -0.188255232 | -3.008429651 | 2.340968587  |
| ENSORLG00000016429  | -                  | -                                                                                                                                                           | 3.619600831  | 2.538080949  | -1.029859796 | 0.052145036  |
| ENSORLG00000007868  | qucy2d             | guanylate cyclase 2D, retinal [Source:ZFIN;Acc:ZDB-GENE-011128-9]                                                                                           | 3.947644366  | 2.332752961  | -0.430962203 | 1.184413695  |
| ENSORLG00000007680  | cmbl               | carboxymethylglutaminylase homolog [Source:NCBI;gene:Acc:101171616]                                                                                         | 3.141900812  | 0.971343241  | 0.021738422  | 2.192780725  |
| ENSORLG00000016402  | vdr                | Oryzias latipes vitamin D (1,25-dihydroxyvitamin D3) receptor (vdr), mRNA [Source:RefSeq; mRNA; Acc:NM_001128517]                                           | 3.120066476  | 0.060388589  | -1.29317278  | 1.766899706  |
| ENSORLG00000010166  | slc7a2             | solute carrier family 7 member 2 [Source:NCBI;gene:Acc:101165487]                                                                                           | 5.322947473  | 0.095393686  | -2.873804805 | 2.354234972  |
| ENSORLG00000012540  | pxdc1b             | PX domain containing 1 [Source:NCBI;gene:Acc:101165607]                                                                                                     | 4.640245155  | 2.995636034  | -0.267584211 | 1.377509199  |
| ENSORLG00000006079  | slc22w6i           | solute carrier family 22 member 6 [Source:NCBI;gene:Acc:101168641]                                                                                          | 6.877724768  | -0.701791334 | -5.630916679 | 1.948492906  |
| ENSORLG00000013845  | -                  | -                                                                                                                                                           | 5.860735513  | 2.044014911  | -2.064315831 | 1.75288776   |

|                    |               |                                                                                                                        |              |              |              |              |
|--------------------|---------------|------------------------------------------------------------------------------------------------------------------------|--------------|--------------|--------------|--------------|
| ENSRGLG00000009418 | ve1a          | vinculin a [Source:ZFIN;Acc:ZDB-GENE-050506-61]                                                                        | 4.856194896  | 2.654586431  | -1.149654988 | 1.052437035  |
| ENSRGLG00000011362 | dusp4         | dual specificity phosphatase 4 [Source:ZFIN;Acc:ZDB-GENE-040476-109]                                                   | 5.272344634  | -0.059173465 | -1.577894216 | 3.754106664  |
| ENSRGLG00000016315 | nr2f5         | nuclear receptor subfamily 2 group F member 5 [Source:NCBI;gene:Acc:101174296]                                         | 4.418504357  | 0.602789032  | -2.717595999 | 1.098605478  |
| ENSRGLG00000016896 | -             | -                                                                                                                      | 4.388824271  | 0.931550277  | -2.467625415 | 0.98897678   |
| ENSRGLG00000016570 | -             | -                                                                                                                      | 3.26783029   | 2.280739373  | -1.191027273 | -0.213451583 |
| ENSRGLG00000012490 | glf3          | GLI family zinc finger 3 [Source:ZFIN;Acc:ZDB-GENE-041111-162]                                                         | 4.511450875  | 1.682114558  | -0.971706591 | 1.858113598  |
| ENSRGLG00000004902 | -             | -                                                                                                                      | 6.314043665  | 3.070614536  | -2.798891948 | 0.44507679   |
| ENSRGLG00000007318 | nmp14a        | matrix metalloproteinase 14a (membrane-inserted) [Source:ZFIN;Acc:ZDB-GENE-030901-11]                                  | 3.261566337  | 2.314552132  | -1.185899533 | -0.23831175  |
| ENSRGLG00000012076 | KCNK3         | potassium two pore domain channel subfamily K member 3 [Source:NCBI;gene:Acc:101167669]                                | 5.617303062  | 2.804072831  | -1.558195966 | 1.255512778  |
| ENSRGLG00000010866 | CLDN5         | claudin 5 [Source:NCBI;gene:Acc:101166566]                                                                             | 4.4651649    | 1.968625675  | -3.088620208 | -0.587680666 |
| ENSRGLG00000003465 | cyp26b1       | Cyp26a1 cytochrome P450, family 26, subfamily B, polypeptide 1 (cyp26b1), mRNA [Source:RefSeq;transcript:NM_001278821] | 4.954290288  | 1.531337986  | -1.127641186 | 2.295793481  |
| ENSRGLG00000001617 | -             | -                                                                                                                      | 5.580751487  | 1.489303931  | -2.488241899 | 2.6238904    |
| ENSRGLG00000015028 | -             | -                                                                                                                      | 3.993017488  | -1.301421808 | -3.37067352  | 1.924251241  |
| ENSRGLG00000007393 | zgc134058     | zgc134058 [Source:ZFIN;Acc:ZDB-GENE-060929-48]                                                                         | 3.870483404  | 0.501753601  | -0.536259683 | 2.832955529  |
| ENSRGLG00000012858 | MAT1A         | methionine adenosyltransferase 1A [Source:HGNC;Symbol:Acc:HGNC:5903]                                                   | 3.441744233  | 2.025368366  | -1.23465156  | 0.182209686  |
| ENSRGLG00000016620 | slc1key-235d1 | slc1key-235d1 [Source:ZFIN;Acc:ZDB-GENE-041014-243]                                                                    | 4.379577653  | 0.740924505  | -2.115018194 | 1.524119329  |
| ENSRGLG00000016941 | THRA          | thyroid hormone receptor alpha [Source:HGNC;Symbol:Acc:HGNC:11796]                                                     | 3.248332195  | 1.010604936  | -1.670886502 | 0.567325114  |
| ENSRGLG00000013461 | mitfb         | microphthalmia-associated transcription factor [Source:NCBI;gene:Acc:101165733]                                        | 5.739051788  | 3.466595123  | -0.530365837 | 1.722568438  |
| ENSRGLG00000010611 | nr4f4         | neuropilin cytosolic factor 4 [Source:NCBI;gene:Acc:101171890]                                                         | 3.463469431  | 1.893068708  | -0.094477729 | 1.486407299  |
| ENSRGLG00000019015 | KLF2          | Kruppel-like factor 2 [Source:NCBI;gene:Acc:101170127]                                                                 | 5.528020697  | 1.430574357  | -2.428329949 | 1.638601151  |
| ENSRGLG00000001321 | araq1b        | endoplasmic reticulum aminopeptidase 1b [Source:ZFIN;Acc:ZDB-GENE-040476-934]                                          | 3.566013605  | 1.079108934  | -2.063488049 | 0.417901473  |
| ENSRGLG00000013048 | pyylt1b       | glycoside xylosyltransferase 1b [Source:ZFIN;Acc:ZDB-GENE-041210-118]                                                  | 3.11212787   | 1.420426148  | 1.297766847  | 2.989952883  |
| ENSRGLG00000003707 | dnab2ipb      | DAB2 interacting protein b [Source:ZFIN;Acc:ZDB-GENE-030131-2449]                                                      | 3.681391685  | 0.871295611  | -1.168659399 | 1.641928002  |
| ENSRGLG00000017983 | cd4           | complement factor D (cd4psn) [Source:ZFIN;Acc:ZDB-GENE-050522-411]                                                     | 3.932967185  | 2.76540052   | -0.996865341 | 0.171185989  |
| ENSRGLG00000005107 | zinc1a        | JAZF zinc finger 1a [Source:ZFIN;Acc:ZDB-GENE-060503-482]                                                              | 3.768955583  | 1.624577736  | -0.224585534 | 1.920277082  |
| ENSRGLG00000005025 | -             | -                                                                                                                      | 5.814213854  | 1.398025946  | -4.235434948 | 0.181238343  |
| ENSRGLG00000012601 | -             | isocitrate dehydrogenase [NADP] mitochondrial [Source:NCBI;gene:Acc:101166744]                                         | 4.289331491  | 0.91196107   | -6.658617134 | 2.727038722  |
| ENSRGLG00000013422 | ARG1          | arginase 1 [Source:HGNC;Symbol:Acc:HGNC:663]                                                                           | 8.210352669  | 0.923858986  | -6.579751446 | 0.838700314  |
| ENSRGLG00000016029 | tsparn9a      | tetraspanin 9a [Source:ZFIN;Acc:ZDB-GENE-060503-632]                                                                   | 3.970943297  | 1.822170711  | -1.836585203 | 0.31267338   |
| ENSRGLG00000000655 | ampd1         | adenosine monophosphate deaminase 1 [Source:NCBI;gene:Acc:101172409]                                                   | 5.667454605  | 0.046863398  | -3.071647635 | 2.549435594  |
| ENSRGLG00000004319 | col1a2        | collagen, type I, alpha 2 [Source:ZFIN;Acc:ZDB-GENE-030131-8415]                                                       | 5.148886364  | 2.037238394  | -4.017331727 | -0.905216882 |
| ENSRGLG00000004132 | plg2r1        | phospholipase A2 receptor 1 [Source:ZFIN;Acc:ZDB-GENE-120223-11]                                                       | 3.075461269  | 1.743981577  | -0.518836998 | 0.813128284  |
| ENSRGLG00000000951 | col21a1       | collagen, type XXI, alpha 1 [Source:ZFIN;Acc:ZDB-GENE-110607-31]                                                       | 5.877649695  | 3.368092607  | 0.013232301  | 2.52327806   |
| ENSRGLG00000015339 | gp44a         | glutathione peroxidase 4a [Source:ZFIN;Acc:ZDB-GENE-030410-21]                                                         | 3.106227288  | 1.196045241  | -0.23746637  | 1.673200645  |
| ENSRGLG00000016690 | wrgb          | retinoid X receptor, gamma b [Source:ZFIN;Acc:ZDB-GENE-040718-34]                                                      | 3.83834821   | 0.972336315  | -2.798817682 | 0.069678877  |
| ENSRGLG00000015684 | prdm1a        | PR domain containing 1a, with ZNF domain [Source:ZFIN;Acc:ZDB-GENE-030131-2193]                                        | 3.76493368   | -0.049078314 | -1.092579974 | 2.721917019  |
| ENSRGLG00000010969 | PLXND1        | olefin D1 [Source:HGNC;Symbol:Acc:HGNC:91071]                                                                          | 3.451999632  | 1.387330413  | -2.24719921  | -0.18204547  |
| ENSRGLG00000016181 | pel12         | E3 ubiquitin-protein ligase pelino homolog 2 [Source:NCBI;gene:Acc:101166500]                                          | 4.10784576   | 1.705388149  | -0.877556893 | 1.525385664  |
| ENSRGLG00000004818 | -             | -                                                                                                                      | 4.247045207  | 1.240045588  | -1.589643095 | 1.417480609  |
| ENSRGLG00000000014 | -             | -                                                                                                                      | 3.742265713  | 0.884645425  | -0.854781467 | 2.00323273   |
| ENSRGLG00000002990 | zgc163057     | hemoglobin subunit alpha-D [Source:NCBI;gene:Acc:101170468]                                                            | 18.445898992 | 12.25114803  | -3.275040664 | 2.92017791   |
| ENSRGLG00000016560 | ica1          | islet cell autoantigen 1 [Source:ZFIN;Acc:ZDB-GENE-040718-490]                                                         | 3.987056699  | 1.155519986  | -0.789014927 | 2.042992223  |
| ENSRGLG00000006475 | slc19a1       | solute carrier family 19 (folate transporter), member 1 [Source:ZFIN;Acc:ZDB-GENE-110401-11]                           | 3.480984347  | 0.922701173  | -1.175111887 | 1.383655018  |
| ENSRGLG00000007274 | -             | -                                                                                                                      | 3.96304837   | 1.636393361  | -0.210351303 | 2.096786845  |
| ENSRGLG00000015717 | zgc113307     | zgc113307 [Source:ZFIN;Acc:ZDB-GENE-050522-29]                                                                         | 5.078785355  | -1.361031898 | -2.283410093 | 4.194864941  |
| ENSRGLG00000012375 | -             | -                                                                                                                      | 3.867531739  | 1.196350619  | -0.137420038 | 2.534247085  |
| ENSRGLG00000012424 | wt1           | Wilms' tumor suppressor 1 [Source:NCBI;gene:Acc:100893288]                                                             | 3.388604054  | 2.008942609  | -0.813554472 | 0.566591999  |
| ENSRGLG00000015724 | flt0          | interleukin 10 [Source:ZFIN;Acc:ZDB-GENE-051111-11]                                                                    | 15.6646931   | 11.68304285  | -0.101784198 | 3.8803312    |
| ENSRGLG00000016391 | zgc153031     | zgc153031 [Source:ZFIN;Acc:ZDB-GENE-060929-1190]                                                                       | 3.296239654  | 0.427956603  | -1.784271805 | 1.084546277  |
| ENSRGLG00000000670 | unc5a         | unc-5 netrin receptor A [Source:ZFIN;Acc:ZDB-GENE-080219-19]                                                           | 4.284611919  | -0.580364298 | -0.815450508 | 4.050013504  |
| ENSRGLG00000013713 | kfl1          | Kruppel-like factor 1 (erythroid) [Source:ZFIN;Acc:ZDB-GENE-880526-55]                                                 | 15.97609441  | 8.822092774  | -0.568698177 | 2.097565516  |
| ENSRGLG00000014351 | cpk3b         | complement 3 [Source:NCBI;gene:Acc:101167694]                                                                          | 15.8784912   | 13.75439483  | -15.67844389 | -13.75441884 |
| ENSRGLG00000009716 | TC2N          | tandem C2 domains, nuclear [Source:HGNC;Symbol:Acc:HGNC:19859]                                                         | 5.13877268   | 0.947970851  | -2.293887921 | 1.897399642  |
| ENSRGLG00000006633 | tfap2a        | transcription factor AP-2 alpha [Source:ZFIN;Acc:ZDB-GENE-011212-6]                                                    | 4.706341633  | -0.946754881 | -2.598634506 | 3.054945509  |
| ENSRGLG00000012066 | srx13         | SRY (sex determining region Y)-box 13 [Source:ZFIN;Acc:ZDB-GENE-100519-11]                                             | 5.00707375   | 1.076975166  | -1.366176606 | 2.564411145  |
| ENSRGLG00000003886 | ldlrb         | low density lipoprotein receptor b [Source:ZFIN;Acc:ZDB-GENE-040476-1254]                                              | 5.853679414  | 2.102363212  | -1.199253951 | 2.552547415  |
| ENSRGLG00000008387 | tcf7l2        | transcription factor 7 like 2 [Source:ZFIN;Acc:ZDB-GENE-991110-8]                                                      | 3.081011909  | 0.886394894  | -0.191387575 | 2.003714341  |
| ENSRGLG00000010082 | arhgef40      | Rho guanine nucleotide exchange factor (GEF) 40 [Source:ZFIN;Acc:ZDB-GENE-110623-2]                                    | 3.259827005  | 1.464423913  | -1.459680523 | 0.33627078   |
| ENSRGLG00000002376 | -             | -                                                                                                                      | 3.167323109  | -12.69091028 | -3.024501964 | 12.83424388  |
| ENSRGLG00000015484 | -             | -                                                                                                                      | 6.595660236  | -9.696045993 | -2.314960802 | 13.97725488  |
| ENSRGLG00000017571 | cx29.6.11.01  | connexin 29.6 [Source:ZFIN;Acc:ZDB-GENE-040406-4]                                                                      | 18.41867988  | 12.10753644  | -2.025248871 | 2.291342852  |
| ENSRGLG00000004651 | icbr          | integrin beta 6 [Source:ZFIN;Acc:ZDB-GENE-100812-2]                                                                    | 4.2111761    | 1.817096389  | -1.13535953  | 1.21779595   |
| ENSRGLG00000002527 | nectin1b      | nectin cell adhesion molecule 1b [Source:ZFIN;Acc:ZDB-GENE-080224-2]                                                   | 5.519172402  | 2.114556188  | -1.169266719 | 2.25833162   |
| ENSRGLG00000004864 | kcm6al        | kyne (G)-specific demethylase 6A, like [Source:ZFIN;Acc:ZDB-GENE-070112-2002]                                          | 4.604260181  | 1.687897852  | -0.69576419  | 2.221082636  |
| ENSRGLG00000006558 | fam78ab       | family with sequence similarity 78, member AB [Source:ZFIN;Acc:ZDB-GENE-080220-25]                                     | 4.626430079  | 1.490814975  | -2.924508328 | 0.21159784   |
| ENSRGLG00000006158 | tfap2c        | transcription factor AP-2 gamma (activating enhancer binding protein 2 gamma) [Source:ZFIN;Acc:ZDB-GENE-041212-61]     | 3.405373925  | -0.011718694 | -1.453782196 | 1.963797504  |
| ENSRGLG00000016159 | tcma          | transcriptional and immune response regulator a [Source:ZFIN;Acc:ZDB-GENE-050320-36]                                   | 6.122102923  | 2.206140499  | -1.927976785 | 1.988470295  |
| ENSRGLG00000008678 | rgmb          | repulsive guidance molecule BMP co-receptor b [Source:ZFIN;Acc:ZDB-GENE-040527-2]                                      | 3.182512935  | 1.209097304  | 0.327888065  | 3.001768356  |
| ENSRGLG00000002157 | RFO0190       | small nucleolar RNA SNORA16B/SNORA16A family [Source:NCBI;gene:Acc:111948266]                                          | 3.972871705  | 3.131112837  | 0.862285692  | 1.704532694  |

|  |                     |              |                                                                                                                       |             |              |              |              |
|--|---------------------|--------------|-----------------------------------------------------------------------------------------------------------------------|-------------|--------------|--------------|--------------|
|  | ENSRORG0000015018   | adgre5b.3    | adhesion G protein-coupled receptor E5b, duplicate 3 [Source:ZFIN;Acc:ZDB-GENE-121214-275]                            | 4.570639617 | 0.799120706  | -2.749473618 | 1.022529762  |
|  | ENSRORG0000004433   | asza         | SK homeobox 2 [Source:NCBI;gene:Acc:101161260]                                                                        | 4.065318586 | -1.203215336 | -2.787770357 | 2.471249641  |
|  | ENSRORG0000001848   | -            | four and a half LIM domains protein 2-like [Source:NCBI;gene:Acc:10174895]                                            | 15.85340191 | 12.40712168  | -2.766180945 | 6.680567516  |
|  | ENSRORG0000012122   | -            | -                                                                                                                     | 3.357537102 | -0.478355217 | -0.935667507 | 2.900709846  |
|  | ENSRORG00000011935  | bcar3        | BCAR3, NSP family adaptor protein [Source:ZFIN;Acc:ZDB-GENE-080513_4]                                                 | 4.143683494 | 1.721264951  | -0.982757821 | 1.440146191  |
|  | ENSRORG00000016242  | HMBXK1       | homeobox containing 1 [Source:HGNC;Symbol:Acc:HGNC:26137]                                                             | 3.066091825 | 0.667940129  | -0.928263083 | 1.470373754  |
|  | ENSRORG00000015287  | adgrg1       | adhesion G protein-coupled receptor G1 [Source:ZFIN;Acc:ZDB-GENE-030131_3671]                                         | 5.048999299 | 1.06277812   | -1.827196465 | 2.159509694  |
|  | ENSRORG0000004204   | tzd2         | frizzled class receptor 2 [Source:ZFIN;Acc:ZDB-GENE-990415_224]                                                       | 5.408865541 | 2.718099423  | -0.292247185 | 2.399058819  |
|  | ENSRORG0000002956   | infap8i3     | tumor necrosis factor, alpha-induced protein 8-like 3 [Source:ZFIN;Acc:ZDB-GENE-040426_1313]                          | 4.493730894 | 1.416954037  | -2.085632159 | 0.991629899  |
|  | ENSRORG00000011143  | ktga9        | integrin, alpha 9 [Source:ZFIN;Acc:ZDB-GENE-040426_1129]                                                              | 4.281112267 | 2.902353009  | -1.335108111 | 0.044135609  |
|  | ENSRORG00000022020  | preli1b      | PREL1 domain-containing protein 1, mitochondrial-like [Source:NCBI;gene:Acc:101156360]                                | 3.890521639 | 1.528684716  | -0.828193734 | 1.534128321  |
|  | ENSRORG00000011552  | lts2b        | leucine zipper tumor suppressor 2 [Source:NCBI;gene:Acc:101164513]                                                    | 4.472687799 | 1.36197157   | -0.249524185 | 2.861678904  |
|  | ENSRORG00000016356  | -            | -                                                                                                                     | 7.588055086 | 0.264367883  | -7.023211339 | 0.280960771  |
|  | ENSRORG00000009243  | tlr38.39     | tlr38.39 [Source:ZFIN;Acc:ZDB-GENE-030131_8104]                                                                       | 4.238588807 | -0.257050745 | -1.25098852  | 3.243080796  |
|  | ENSRORG00000005778  | zbtb7c       | zinc finger and BTB domain containing 7C [Source:ZFIN;Acc:ZDB-GENE-130530_373]                                        | 4.298348966 | 1.446748849  | -0.611562127 | 2.240523383  |
|  | ENSRORG00000006274  | pnpla2       | patatin-like phospholipase domain containing 2 [Source:ZFIN;Acc:ZDB-GENE-120913_3]                                    | 3.606293633 | 0.859378643  | -1.090399126 | 1.657010996  |
|  | ENSRORG00000002955  | -            | uncharacterized LOC101172678 [Source:NCBI;gene:Acc:101172678]                                                         | 3.472982734 | 0.966232638  | -0.384797337 | 2.122437681  |
|  | ENSRORG00000010404  | atg4c        | autophagy related 4C, cysteine peptidase [Source:NCBI;gene:Acc:101155417]                                             | 3.234874247 | 0.669478805  | 0.387344162  | 2.953224513  |
|  | ENSRORG00000001005  | -            | -                                                                                                                     | 3.294831692 | 1.261812126  | -2.202008109 | -0.168503741 |
|  | ENSRORG00000000624  | zqc153704    | licocalcin [Source:NCBI;gene:Acc:101165663]                                                                           | 3.371410898 | 0.488338044  | -0.270827356 | 2.612739487  |
|  | ENSRORG00000005847  | rtnm47       | RNA binding motif protein 47 [Source:ZFIN;Acc:ZDB-GENE-030131_3812]                                                   | 5.837069111 | 1.445745871  | -1.423529452 | 2.968278731  |
|  | ENSRORG00000006206  | eyn2         | EYA transcriptional coactivator and phosphatase 2 [Source:ZFIN;Acc:ZDB-GENE-040912_24]                                | 4.442405682 | 2.36254681   | -0.339293324 | 1.741047867  |
|  | ENSRORG00000016574  | -            | -                                                                                                                     | 3.740478248 | 1.421682563  | -0.606707672 | 1.713203957  |
|  | ENSRORG00000001787  | slc35f2      | info solute carrier family 35, member F2, like [Source:ZFIN;Acc:ZDB-GENE-130530-1004]                                 | 5.14431688  | -1.075365115 | -2.481232205 | 3.738932372  |
|  | ENSRORG00000015827  | wfdc1        | WAP four-disulfide core domain 1 [Source:ZFIN;Acc:ZDB-GENE-070112_352]                                                | 6.282732906 | 4.077999011  | -2.567740186 | -0.362518982 |
|  | ENSRORG00000002466  | slc2h11-85n1 | slc2h11-85n1b.4 [Source:ZFIN;Acc:ZDB-GENE-030131_7043]                                                                | 3.404794691 | 1.721884631  | -1.056391101 | 0.627003184  |
|  | ENSRORG00000009652  | tufta1a      | tuftelin 1a [Source:ZFIN;Acc:ZDB-GENE-061103-184]                                                                     | 3.370216807 | 0.620263207  | -1.49844757  | 2.551990814  |
|  | ENSRORG00000008660  | lrrc3b       | leucine rich repeat containing 3B [Source:NCBI;gene:Acc:101157953]                                                    | 3.047968067 | 0.97762434   | 0.376933039  | 2.447762012  |
|  | ENSRORG00000003816  | csf8         | cytokine inducible SH2-containing protein [Source:ZFIN;Acc:ZDB-GENE-050907_1]                                         | 3.263763348 | 0.191898822  | -2.188085497 | 0.884263869  |
|  | ENSRORG00000017279  | -            | -                                                                                                                     | 5.83269811  | -10.04328708 | -0.529418565 | 15.34707181  |
|  | ENSRORG00000017646  | adh5         | Oryza latipes alcohol dehydrogenase 5 (class III), ch polypeptide (adh5), mRNA [Source:RefSeq; mRNA:Acc:NM_001104796] | 7.012723622 | 2.119697285  | -4.166887337 | 0.726624268  |
|  | ENSRORG00000006884  | rhoub        | rho-related GTP-binding protein RhoU [Source:NCBI;gene:Acc:101159601]                                                 | 5.976790726 | 1.440514612  | -1.77015053  | 2.766610691  |
|  | ENSRORG00000005978  | spock3       | proteoglycan 3 [Source:ZFIN;Acc:ZDB-GENE-090311-]                                                                     | 4.595221344 | 2.155562858  | -2.006035503 | 0.434110177  |
|  | ENSRORG00000002084  | prs35        | protease, serine, 35 [Source:ZFIN;Acc:ZDB-GENE-040704-55]                                                             | 4.465405264 | 0.59120549   | -3.250757889 | 0.623921717  |
|  | ENSRORG00000008248  | coro7        | mitochondrial import inner membrane translocase subunit TIM16 [Source:NCBI;gene:Acc:101155031]                        | 3.216452622 | 0.670427544  | -1.481333522 | 1.065176596  |
|  | ENSRORG00000011390  | gpr18        | G protein-coupled receptor 18 [Source:ZFIN;Acc:ZDB-GENE-070912_159]                                                   | 4.705411228 | 2.722221131  | -2.486450819 | -0.502775332 |
|  | ENSRORG00000004145  | poth1g30     | protocadherin 1, gamma 30 [Source:ZFIN;Acc:ZDB-GENE-050609_23]                                                        | 3.479618934 | 1.353401468  | -1.449514527 | 0.677188864  |
|  | ENSRORG00000003502  | slc3ky-165a2 | slc3ky-165a2.9 [Source:ZFIN;Acc:ZDB-GENE-141209-11]                                                                   | 5.982143895 | 3.212580671  | -2.103688878 | 0.66638919   |
|  | ENSRORG00000008568  | akr1a1a      | alcohol dehydrogenase [NAD(+)] A-like [Source:NCBI;gene:Acc:101175168]                                                | 6.117376906 | 0.701703716  | -0.860778803 | 4.555373535  |
|  | ENSRORG00000005567  | ZNF462       | zinc finger protein 462 [Source:HGNC;Symbol:Acc:HGNC:21894]                                                           | 3.28689027  | 1.04510333   | -0.684060665 | 1.558211041  |
|  | ENSRORG00000014548  | -            | -                                                                                                                     | 18.34696044 | 14.50454517  | -2.779925889 | 1.062958861  |
|  | ENSRORG00000006847  | apd1b        | glycerol-3-phosphate dehydrogenase 1b [Source:ZFIN;Acc:ZDB-GENE-030131_3986]                                          | 3.820345298 | 2.759847547  | -0.071383961 | 0.989597567  |
|  | ENSRORG00000003046  | hbae5        | hemoglobin, alpha embryonic 5 [Source:ZFIN;Acc:ZDB-GENE-101028-1]                                                     | 5.703787996 | 1.022274623  | -2.733292129 | 1.949606008  |
|  | ENSRORG00000012307  | zland5a      | zinc finger AN1-type containing 5 [Source:NCBI;gene:Acc:101155116]                                                    | 3.412835782 | 1.056990304  | -0.251858479 | 2.104503201  |
|  | ENSRORG00000016164  | -            | -                                                                                                                     | 4.533368544 | -13.64884177 | -4.651719264 | 13.53100124  |
|  | ENSRORG00000006356  | snix         | spermine oxidase [Source:NCBI;gene:Acc:101164210]                                                                     | 4.20135887  | 2.085021747  | -1.05336636  | 1.1121165    |
|  | ENSRORG00000005264  | -            | -                                                                                                                     | 3.792461234 | 0.753901509  | -2.143678477 | 0.89538296   |
|  | ENSRORG00000010039  | ndrg2        | protein NDRC2 [Source:NCBI;gene:Acc:101163361]                                                                        | 4.992673846 | 2.923724478  | -2.457129313 | -0.387895137 |
|  | ENSRORG00000002123  | boka         | BOK, BCL2 family apoptosis regulator 4 [Source:ZFIN;Acc:ZDB-GENE-040801_131]                                          | 4.51575064  | 0.966031094  | -0.058117047 | 0.492087143  |
|  | ENSRORG00000016510  | zfyve9b      | zinc finger, FYVE domain containing 9b [Source:ZFIN;Acc:ZDB-GENE-110825_21]                                           | 5.009054544 | 2.781797475  | -0.423987415 | 1.80375256   |
|  | ENSRORG00000014497  | -            | -                                                                                                                     | 3.784598818 | 1.58473428   | 0.05063552   | 2.240413658  |
|  | ENSRORG00000010566  | -            | -                                                                                                                     | 3.892361867 | 2.509148212  | -3.773004011 | -2.389305131 |
|  | ENSRORG00000015418  | mmp15        | Oryza latipes matrix metalloproteinase 15 (mmp15), mRNA [Source:RefSeq; mRNA:Acc:NM_001104883]                        | 4.523460121 | 2.442627569  | -1.675474797 | 0.405570183  |
|  | ENSRORG00000017446  | catpd        | CCAAT enhancer binding protein delta [Source:ZFIN;Acc:ZDB-GENE-020111_4]                                              | 4.553648809 | 0.661757535  | -2.914357292 | 0.978018894  |
|  | ENSRORG00000005072  | rbp4         | retinol binding protein 4 [Source:NCBI;gene:Acc:101157673]                                                            | 5.653984309 | 1.496048246  | -2.183993131 | 1.974427969  |
|  | ENSRORG00000008004  | zpc-101810   | actin-related protein 2-B [Source:NCBI;gene:Acc:101157161]                                                            | 3.4933553   | 1.681319717  | -1.448959149 | 0.363561857  |
|  | ENSRORG00000014950  | olmi3c       | olfactomedin-like 3b [Source:ZFIN;Acc:ZDB-GENE-050302-161]                                                            | 3.853169143 | 1.51851508   | -3.557849562 | -1.222709862 |
|  | ENSRORG00000013833  | -            | -                                                                                                                     | 3.709954915 | 0.862532907  | -1.41125754  | 1.436648895  |
|  | ENSRORG00000005750  | slit2        | slit homolog 2 (Drosophila) [Source:ZFIN;Acc:ZDB-GENE-010306-3]                                                       | 4.917354046 | 1.442575656  | -1.11358702  | 2.36167729   |
|  | ENSRORG00000005424  | cdh16        | cadherin 16, KSP-cadherin [Source:ZFIN;Acc:ZDB-GENE-140106-140]                                                       | 5.005252235 | -2.633212238 | -6.287975586 | 1.350960913  |
|  | ENSRORG00000010812  | efz2k        | eukaryotic elongation factor 2 kinase [Source:ZFIN;Acc:ZDB-GENE-020916-2]                                             | 3.385041159 | 1.362499616  | -0.825391603 | 1.197634894  |
|  | ENSRORG00000011780  | -            | -                                                                                                                     | 4.12895798  | 7.06459236   | -0.18351093  | 1.873491408  |
|  | ENSRORG00000013379  | -            | -                                                                                                                     | 5.151740708 | 2.228572022  | -0.898368401 | 2.025286999  |
|  | ENSRORG00000003869  | lam20a       | family with sequence similarity 20, member A [Source:ZFIN;Acc:ZDB-GENE-081022-117]                                    | 4.164265609 | 0.142912802  | -2.51575689  | 1.506080958  |
|  | ENSRORG00000005345  | slc16a9a     | solute carrier family 16, member 9a [Source:ZFIN;Acc:ZDB-GENE-040426-1364]                                            | 5.356138886 | 3.62127558   | -0.547144453 | 1.188201683  |
|  | ENSRORG00000002812  | tmem98       | transmembrane protein 98 [Source:NCBI;gene:Acc:101155691]                                                             | 3.68782273  | 1.428063506  | -2.531421028 | -0.271176881 |
|  | ENSRORG000000017603 | dec11a       | C-type lectin domain containing 11A [Source:ZFIN;Acc:ZDB-GENE-130530-861]                                             | 3.234191687 | 2.058036603  | -0.114414093 | 1.06249894   |

|  |  |                     |                |                                                                                                                 |             |              |               |              |
|--|--|---------------------|----------------|-----------------------------------------------------------------------------------------------------------------|-------------|--------------|---------------|--------------|
|  |  | ENSORLG00000015630  | -              | uncharacterized LOC101155763 [Source:NCBI gene:Acc:101155763]                                                   | 6.103342151 | 3.328185039  | -1.459025504  | 1.316617416  |
|  |  | ENSORLG00000005336  | SYTL2          | synaptotagmin like 2 [Source:HGNC Symbol:Acc:HGNC:15585]                                                        | 4.122355271 | 0.362325521  | -0.212770739  | 3.547747006  |
|  |  | ENSORLG00000006286  | -              | tyrosinase like [Source:NCBI gene:Acc:101170788]                                                                | 5.07824888  | 2.878486929  | -2.313186111  | -0.119393954 |
|  |  | ENSORLG00000006968  | -              | -                                                                                                               | 3.413853961 | 2.17884091   | -1.417016913  | -0.238850071 |
|  |  | ENSORLG00000009075  | -              | C-X-C motif chemokine 2 [Source:NCBI gene:Acc:101168980]                                                        | 5.067820213 | 1.987717512  | -1.574152345  | 1.506435013  |
|  |  | ENSORLG00000011996  | ehf            | ehf homologous factor [Source:ZFIN:Acc:ZDB-GENE-065312-7]                                                       | 4.922940654 | 0.813599519  | -1.506997488  | 2.602824394  |
|  |  | ENSORLG00000017741  | -              | -                                                                                                               | 3.168947553 | 1.004336971  | -0.480901884  | 1.684194062  |
|  |  | ENSORLG00000001741  | hh1b           | four and a half LIM domains 1b [Source:ZFIN:Acc:ZDB-GENE-031219-11]                                             | 3.198891418 | 1.31948378   | -1.268971582  | 0.610921476  |
|  |  | ENSORLG00000000072  | KIAA0895L      | KIAA0895 like [Source:HGNC Symbol:Acc:HGNC:34408]                                                               | 5.101218578 | 2.908184056  | 0.493276772   | 2.686794532  |
|  |  | ENSORLG00000000874  | p1vapb         | plasmalemma vesicle associated protein b [Source:ZFIN:Acc:ZDB-GENE-060816-96]                                   | 3.612772923 | 1.966822954  | -1.529648545  | 0.116787228  |
|  |  | ENSORLG00000005925  | MBNL1          | muscblind like splicing regulator 1 [Source:NCBI gene:Acc:101171850]                                            | 3.732031226 | 1.77005301   | -1.770151745  | 0.192357887  |
|  |  | ENSORLG00000004498  | PDE3A          | phosphodiesterase 3A [Source:HGNC Symbol:Acc:HGNC:8778]                                                         | 6.582701993 | 3.392181412  | -1.029461189  | 2.161527474  |
|  |  | ENSORLG00000006250  | lctd12b        | potassium channel tetramerisation domain containing 12b [Source:ZFIN:Acc:ZDB-GENE-050417-104]                   | 4.574919553 | 2.6526869    | -1.74689006   | 0.1780178    |
|  |  | ENSORLG00000001457  | -              | -                                                                                                               | 3.117539044 | -1.382710683 | -2.830037494  | 1.67069559   |
|  |  | ENSORLG00000011071  | uk1b           | unc-51 like autophagy activating kinase 1 [Source:ZFIN:Acc:ZDB-GENE-071203-2]                                   | 3.142591519 | 0.66745485   | -0.10453751   | 2.371083549  |
|  |  | ENSORLG00000000472  | s100s          | S100 calcium binding protein 5 [Source:ZFIN:Acc:ZDB-GENE-040922-31]                                             | 4.532172644 | 0.716893675  | -0.924036776  | 2.891172363  |
|  |  | ENSORLG00000006618  | abcb3          | Oryzias latipes antigen peptide transporter 2-like (atcb3), mRNA [Source:RefSeq mRNA:Acc:NM_001278887]          | 4.774648547 | 1.828663771  | -1.037213822  | 1.909254883  |
|  |  | ENSORLG000000013025 | fox1           | hyal oxidase-like 1 [Source:ZFIN:Acc:ZDB-GENE-06503-488]                                                        | 3.23195212  | 1.702848123  | -0.392293851  | 1.137295502  |
|  |  | ENSORLG000000016785 | pycard         | PYD and CARD domain containing [Source:ZFIN:Acc:ZDB-GENE-000511-21]                                             | 5.299448737 | 2.529309591  | -1.32763054   | 1.442994019  |
|  |  | ENSORLG000000010588 | mag1a          | membrane associated guanylate kinase, WW and PDZ domain containing 1a [Source:ZFIN:Acc:ZDB-GENE-081105-13]      | 3.039529279 | 0.794379501  | -0.314098391  | 1.93153702   |
|  |  | ENSORLG000000003995 | ppp1r14aa      | protein phosphatase 1, regulatory (inhibitor) subunit 14aa [Source:ZFIN:Acc:ZDB-GENE-050417-413]                | 5.769744357 | 2.692745404  | -2.173335423  | 0.904147531  |
|  |  | ENSORLG000000002029 | -              | astacin like metallo-protease [Source:NCBI gene:Acc:100049316]                                                  | 6.864075363 | 2.227959485  | -5.44428493   | -0.80766773  |
|  |  | ENSORLG000000002887 | snob1 (1 of m  | snob1 [Source:NCBI gene:Acc:101170044]                                                                          | 7.645589221 | 3.414551359  | -3.738703701  | 0.494820197  |
|  |  | ENSORLG000000018251 | -              | -                                                                                                               | 4.297020241 | 0.390654053  | -2.25715822   | 1.64992516   |
|  |  | ENSORLG000000005019 | slc43a2b       | large neutral amino acids transporter small subunit 4 [Source:NCBI gene:Acc:101131293]                          | 5.444736743 | 1.324467199  | -3.324295467  | 0.796458917  |
|  |  | ENSORLG000000012366 | stom           | stromatin [Source:ZFIN:Acc:ZDB-GENE-980526-486]                                                                 | 4.13784441  | 2.174322048  | -0.359870854  | 1.604136218  |
|  |  | ENSORLG000000004500 | cpm5           | phosphoglucosyltransferase 5 [Source:ZFIN:Acc:ZDB-GENE-06503-838]                                               | 4.533151848 | 1.873184961  | -1.512590158  | 1.147862059  |
|  |  | ENSORLG000000002882 | slc12a1        | solute carrier family 12 (sodium/potassium/chloride transporter), member 1 [Source:ZFIN:Acc:ZDB-GENE-080130-31] | 4.923709544 | -7.438820311 | -4.428561328  | 7.936477616  |
|  |  | ENSORLG000000009017 | ENPP7          | ectonucleotide pyrophosphatase/phosphodiesterase family member 7 [Source:NCBI gene:Acc:101173488]               | 7.693288325 | -1.329668306 | -4.847301523  | 4.176136128  |
|  |  | ENSORLG000000016750 | slch73-21k16.5 | slch73-21k16.5 [Source:ZFIN:Acc:ZDB-GENE-030131-8374]                                                           | 3.511907667 | 0.920894901  | 0.066446466   | 2.653767984  |
|  |  | ENSORLG000000001847 | coro2ba        | coronin 2B [Source:NCBI gene:Acc:101167857]                                                                     | 3.824748954 | 2.544391415  | 0.771307489   | 2.052147926  |
|  |  | ENSORLG000000008993 | qtz2bb         | protein tyrosine kinase 2 beta, b [Source:ZFIN:Acc:ZDB-GENE-020607-1]                                           | 5.181390032 | 1.603885143  | -1.932938078  | 1.645051834  |
|  |  | ENSORLG000000001768 | -              | -                                                                                                               | 6.630526034 | 1.734563153  | -1.641200434  | 3.25231724   |
|  |  | ENSORLG000000002336 | tgfb2l         | transforming growth factor, beta 2, like [Source:ZFIN:Acc:ZDB-GENE-130425-2]                                    | 6.607878217 | 3.027119631  | -1.371435505  | 2.209813454  |
|  |  | ENSORLG000000013450 | foxo3          | Oryzias latipes forkhead box O3 (foxo3), mRNA [Source:RefSeq mRNA:Acc:NM_001160465]                             | 3.878185765 | 1.719345552  | -1.963988721  | 0.195356635  |
|  |  | ENSORLG000000008849 | waf3b          | WAF protein family, member 3b [Source:ZFIN:Acc:ZDB-GENE-070132-1512]                                            | 3.706424284 | 1.825344558  | 0.379745071   | 2.261310274  |
|  |  | ENSORLG000000006686 | cyp24a1        | cytochrome P450, family 24, subfamily A, polypeptide 1 [Source:ZFIN:Acc:ZDB-GENE-060825-1]                      | 3.358308331 | 1.401657138  | -2.116289762  | -0.159151466 |
|  |  | ENSORLG00000007988  | cpe            | carboxypeptidase E [Source:ZFIN:Acc:ZDB-GENE-090313-68]                                                         | 4.844299229 | 1.623737065  | -2.289751318  | 0.931294348  |
|  |  | ENSORLG00000000881  | acta1          | Oryzias latipes actin, alpha 1, skeletal muscle (acta1), mRNA [Source:RefSeq mRNA:Acc:NM_001104806]             | 5.927846049 | -0.472017521 | -6.687832166  | -0.287483837 |
|  |  | ENSORLG000000014469 | -              | -                                                                                                               | 4.053764278 | 1.863311968  | -0.238038448  | 1.95289908   |
|  |  | ENSORLG000000005839 | hspla12b       | heat shock protein 12B [Source:ZFIN:Acc:ZDB-GENE-070226-1]                                                      | 3.420061084 | 1.868953732  | -0.2403735348 | -0.492143102 |
|  |  | ENSORLG00000000783  | col27a1b       | collagen type XXVII, alpha 1b [Source:ZFIN:Acc:ZDB-GENE-100119-2]                                               | 3.529389171 | 1.285407052  | -1.390000986  | 0.854464895  |
|  |  | ENSORLG000000016380 | hnf4a          | hepatocyte nuclear factor 4, alpha [Source:ZFIN:Acc:ZDB-GENE-030131-1077]                                       | 4.12508924  | -1.072393248 | -2.538709615  | 2.659256834  |
|  |  | ENSORLG000000001940 | kidr           | kinase insert domain receptor like [Source:ZFIN:Acc:ZDB-GENE-000705-1]                                          | 5.212538862 | 2.659379731  | -2.51404854   | 0.039597895  |
|  |  | ENSORLG00000017125  | dega           | desmoplakin [Source:NCBI gene:Acc:101185763]                                                                    | 3.011343555 | 1.784934991  | -0.272695687  | 1.004198188  |
|  |  | ENSORLG000000009758 | tnem173        | transmembrane protein 173 [Source:ZFIN:Acc:ZDB-GENE-120921-1]                                                   | 3.083920659 | 1.072227199  | -2.420324146  | -0.408145039 |
|  |  | ENSORLG000000008504 | infst103       | tumor necrosis factor (ligand) superfamily, member 10 like 3 [Source:ZFIN:Acc:ZDB-GENE-070908-1]                | 4.327372937 | 1.287629612  | -0.162202039  | 2.878025745  |
|  |  | ENSORLG000000017407 | foxa2          | Oryzias latipes Me-HNF3b protein (foxa2), mRNA [Source:RefSeq mRNA:Acc:NM_001104692]                            | 6.581337347 | 0.555006044  | -3.467906299  | 2.559006202  |
|  |  | ENSORLG00000005897  | dkc1b          | docking protein 1b [Source:ZFIN:Acc:ZDB-GENE-040426-20631]                                                      | 4.545913678 | 1.732577218  | -1.229216131  | 1.593606764  |
|  |  | ENSORLG000000014515 | -              | dimethylamine monoxygenase [N-oxide-forming] 5 [Source:NCBI gene:Acc:101173293]                                 | 4.093732431 | 1.503559666  | -0.932807675  | 1.657849914  |
|  |  | ENSORLG000000008870 | anka11         | annexin mx4 [Source:NCBI gene:Acc:100049456]                                                                    | 4.229902906 | 1.825711191  | -0.610568155  | 1.794108604  |
|  |  | ENSORLG000000013881 | foxl1          | forkhead box L1 [Source:ZFIN:Acc:ZDB-GENE-040426-1181]                                                          | 6.247669972 | 0.438893388  | -3.352793304  | 2.456471901  |
|  |  | ENSORLG000000003956 | smad9          | SMAD family member 9 [Source:ZFIN:Acc:ZDB-GENE-031014-11]                                                       | 3.073149788 | 0.267152494  | -1.008451423  | 1.798030386  |
|  |  | ENSORLG00000017858  | -              | -                                                                                                               | 3.286767688 | 0.167592592  | -2.667097986  | 0.452652207  |
|  |  | ENSORLG000000003538 | -              | -                                                                                                               | 4.541647291 | 1.608993023  | -3.526953999  | -0.359759999 |
|  |  | ENSORLG000000010269 | tnem88a        | transmembrane protein 88 [Source:NCBI gene:Acc:101159459]                                                       | 4.709375791 | 1.996282353  | -2.371180608  | 0.342397901  |
|  |  | ENSORLG000000004966 | ADAMTS5        | ADAM metalloproteinase with thrombospondin type 1 motif 5 [Source:HGNC Symbol:Acc:HGNC:2211]                    | 3.099857369 | 2.341918916  | -2.048055951  | -1.289633266 |
|  |  | ENSORLG000000005788 | VAV3           | vav guanine nucleotide exchange factor 3 [Source:HGNC Symbol:Acc:HGNC:12659]                                    | 4.110978885 | 0.572665321  | -0.692669023  | 2.846131286  |
|  |  | ENSORLG000000013277 | tgfr2          | fibroblast growth factor receptor 2 [Source:ZFIN:Acc:ZDB-GENE-030323-1]                                         | 3.746678564 | 1.660036435  | -2.0960608    | -0.0089338   |
|  |  | ENSORLG000000003949 | skb            | v-src avian sarcoma viral oncogene homolog b [Source:ZFIN:Acc:ZDB-GENE-090715-10]                               | 4.053875151 | 1.140676757  | -1.997598383  | 0.916174417  |
|  |  | ENSORLG000000015508 | HAND1          | heart and neural crest derivatives expressed 1 [Source:HGNC Symbol:Acc:HGNC:4807]                               | 7.582275021 | 1.707664977  | -4.165770149  | 1.709320815  |
|  |  | ENSORLG000000009785 | srivkey-15102  | -                                                                                                               | 3.844381544 | 1.791787227  | -0.547774311  | 1.505304981  |
|  |  | ENSORLG000000016245 | -              | -                                                                                                               | 4.61852206  | 2.371342159  | -0.523444845  | 1.7242035    |
|  |  | ENSORLG000000016848 | -              | -                                                                                                               | 4.851985565 | 0.279102756  | -3.309179482  | 1.264188403  |
|  |  | ENSORLG000000010315 | tpar4          | tyrosylphosphatidic acid receptor 4 [Source:ZFIN:Acc:ZDB-GENE-120201-1]                                         | 3.130622088 | 1.452022582  | -1.747312841  | -0.068229606 |
|  |  | ENSORLG000000017235 | slch211-234h.7 | slch211-234h.7 [Source:ZFIN:Acc:ZDB-GENE-061009-16]                                                             | 3.586371054 | -1.341567501 | -1.273555287  | 0.364870223  |

|                     |                |                                                                                                   |             |              |              |              |
|---------------------|----------------|---------------------------------------------------------------------------------------------------|-------------|--------------|--------------|--------------|
| ENSRLOG00000017851  | gpr143         | G protein-coupled receptor 143 [Source:ZFIN,Acc:ZDB-GENE-040426-1476]                             | 3.873329835 | 0.591496324  | -0.956412626 | 2.325905734  |
| ENSRLOG00000017849  | ASB9           | ankyrin repeat and SOCS box containing 9 [Source:HGNC Symbol,Acc:HGNC:17184]                      | 17.05404081 | 11.21400334  | -3.461396282 | 2.379109007  |
| ENSRLOG00000004591  | ndrip2         | Nesf4 family interacting protein 2 [Source:ZFIN,Acc:ZDB-GENE-040426-2662]                         | 4.103084166 | 1.151113393  | -0.239565621 | 2.712901346  |
| ENSRLOG00000006983  | hbeqf8         | heparin-binding EGF-like growth factor A [Source:ZFIN,Acc:ZDB-GENE-080204-119]                    | 3.129560208 | 2.134782058  | 0.467854337  | 1.463063085  |
| ENSRLOG00000013840  | si.ch211-1a19  | consulin [Source:NCBI gene,Acc:101170010]                                                         | 5.07601771  | 2.83845805   | -0.644483354 | 1.543678754  |
| ENSRLOG00000010146  | edtic1         | evxinon-1c [Source:NCBI gene,Acc:101189374]                                                       | 4.025150541 | 1.80380992   | -0.9450123   | 1.274793374  |
| ENSRLOG00000008809  | anxa4          | Oryzias latipes annexin A4 (anxa4), mRNA [Source:RefSeq mRNA,Acc:NM_00104824]                     | 4.175848293 | 1.373928923  | -0.229704098 | 2.572700166  |
| ENSRLOG00000016533  | -              | -                                                                                                 | 6.228068823 | 3.766637171  | -2.896911422 | -0.436993573 |
| ENSRLOG00000006703  | irf3           | interferon regulatory factor 3 [Source:ZFIN,Acc:ZDB-GENE-071120-7]                                | 4.862285038 | 1.761318364  | -1.192592774 | 1.908860348  |
| ENSRLOG00000013754  | -              | -                                                                                                 | 15.68443168 | 12.88815342  | -2.1767173   | 0.620027831  |
| ENSRLOG00000013171  | LPIN2 (1 of 2) | lipin 2 [Source:HGNC Symbol,Acc:HGNC:14450]                                                       | 4.809176033 | 1.74046019   | -1.874749715 | 1.230307262  |
| ENSRLOG00000015032  | cebpb          | CCAAT/enhancer-binding protein beta [Source:NCBI gene,Acc:101135601]                              | 5.232046071 | 1.018395264  | -3.380420204 | 0.833705597  |
| ENSRLOG00000013738  | -              | -                                                                                                 | 6.337899116 | 3.470281704  | -2.283467392 | 0.584630172  |
| ENSRLOG00000014408  | cpz            | carboxypeptidase Z [Source:ZFIN,Acc:ZDB-GENE-090313-267]                                          | 4.476673972 | 1.115059134  | -2.09531591  | 1.266727993  |
| ENSRLOG00000005983  | si.ch73-1609   | si.ch73-1609.1 [Source:ZFIN,Acc:ZDB-GENE-141212-254]                                              | 5.10918839  | 2.66778111   | -1.902447004 | 0.539441634  |
| ENSRLOG00000006489  | zbtb32         | zinc finger and BTB domain containing 32 [Source:ZFIN,Acc:ZDB-GENE-131121-166]                    | 4.388899191 | 2.079185954  | -1.859866046 | 0.447336328  |
| ENSRLOG00000010176  | ap3a3          | aquaporin-3 [Source:NCBI gene,Acc:101163089]                                                      | 4.258821838 | 2.02369902   | -1.461336299 | 0.771270648  |
| ENSRLOG00000017404  | -              | -                                                                                                 | 5.15902212  | 0.915845692  | -2.113267408 | 2.130294176  |
| ENSRLOG00000000128  | SLC5A9         | solute carrier family 5 member 9 [Source:HGNC Symbol,Acc:HGNC:22146]                              | 4.854237171 | 0.276457814  | -3.112823935 | 1.465432229  |
| ENSRLOG00000010062  | mef2zb         | myocyte enhancer factor 2cb [Source:ZFIN,Acc:ZDB-GENE-040903-7]                                   | 3.768594967 | 2.161966814  | -0.264395254 | 1.342718517  |
| ENSRLOG00000008926  | antir1b        | anthrax toxin receptor 1b [Source:ZFIN,Acc:ZDB-GENE-091204-21]                                    | 3.425506804 | 0.26934078   | -4.037231018 | -0.98058035  |
| ENSRLOG00000013146  | lrrc17         | leucine rich repeat containing 17 [Source:ZFIN,Acc:ZDB-GENE-030131-9774]                          | 3.935430661 | 1.65953643   | -0.454197267 | 1.822180985  |
| ENSRLOG000000050210 | gb             | hemoglobin embryonic subunit alpha-like [Source:NCBI gene,Acc:101174505]                          | 6.637479633 | 0.700020365  | -3.522065273 | 2.415938999  |
| ENSRLOG00000016206  | mra6b          | matrix-remodeling associated 5b [Source:ZFIN,Acc:ZDB-GENE-081104-119]                             | 3.754660707 | 0.812539722  | -0.98117395  | 1.960883026  |
| ENSRLOG00000006889  | nfn5           | netrin 5 [Source:ZFIN,Acc:ZDB-GENE-130530-533]                                                    | 4.05516983  | -0.782957633 | -3.509598346 | 1.332027688  |
| ENSRLOG00000000965  | cpz2           | carboxypeptidase Z2 [Source:NCBI gene,Acc:101193188]                                              | 4.94326798  | 1.701167593  | -4.121173004 | -0.978794311 |
| ENSRLOG00000004769  | perp           | PERP, TP53 apoptosis effector [Source:NCBI gene,Acc:101162224]                                    | 4.256952546 | 1.374318729  | -1.129372356 | 1.753746472  |
| ENSRLOG00000009068  | arpc1b         | actin related protein 2/3 complex, subunit 1b [Source:ZFIN,Acc:ZDB-GENE-030131-7414]              | 4.943312734 | 2.733611327  | -1.65167949  | 0.558506886  |
| ENSRLOG00000010461  | hfc            | transcription factor EC [Source:NCBI gene,Acc:101167503]                                          | 3.266460849 | 0.509702697  | -2.703389938 | 0.053874593  |
| ENSRLOG00000017386  | -              | -                                                                                                 | 3.927372832 | 0.396452968  | -2.448333799 | 1.083070772  |
| ENSRLOG00000006298  | mat2ab         | methionine adenosyltransferase II, alpha b [Source:ZFIN,Acc:ZDB-GENE-050327-61]                   | 3.020622658 | 1.878268271  | 0.351648963  | 1.494488169  |
| ENSRLOG00000011256  | ca4a           | carbonic anhydrase IV a [Source:ZFIN,Acc:ZDB-GENE-080204-85]                                      | 6.967139652 | 1.014603219  | -6.493204638 | -0.540129242 |
| ENSRLOG00000011492  | ca8            | carbonic dehydratase 8 [Source:ZFIN,Acc:ZDB-GENE-001030-3]                                        | 3.672979382 | 1.294498719  | -1.102568038 | 1.276444708  |
| ENSRLOG00000010725  | slpr5a         | slingshotase-1 phosphatase 5a [Source:ZFIN,Acc:ZDB-GENE-041114-188]                               | 6.988393071 | 1.031327335  | -3.449379079 | 2.211298868  |
| ENSRLOG00000015375  | slpr5a         | slingshotase-1 phosphatase 5a [Source:ZFIN,Acc:ZDB-GENE-041114-188]                               | 3.124550957 | 2.088216831  | -1.466307149 | -0.429538295 |
| ENSRLOG00000010118  | -              | -                                                                                                 | 3.997589044 | 1.955803261  | -1.988841938 | 0.065648214  |
| ENSRLOG00000008319  | aldh1a2        | aldehyde dehydrogenase 1 family, member A2 [Source:ZFIN,Acc:ZDB-GENE-011010-3]                    | 5.067048294 | 2.01630605   | -1.562017530 | 1.489154634  |
| ENSRLOG00000006756  | tmem56a        | transmembrane protein 56a [Source:ZFIN,Acc:ZDB-GENE-094012-1]                                     | 4.504708678 | 1.163583809  | -1.430847066 | 1.910762416  |
| ENSRLOG00000012284  | fhag           | Rh associated glycoprotein [Source:ZFIN,Acc:ZDB-GENE-030131-8229]                                 | 5.622492143 | -0.270062113 | -3.930590172 | 1.962448586  |
| ENSRLOG00000006989  | CCAR           | cholesterol kinase A receptor [Source:HGNC Symbol,Acc:HGNC:1570]                                  | 7.262951458 | 2.796792571  | -2.614253649 | 1.852396796  |
| ENSRLOG00000018138  | tmem206        | transmembrane protein 206 [Source:NCBI gene,Acc:101157902]                                        | 4.006231721 | 1.832545402  | -0.524796094 | 1.649375554  |
| ENSRLOG00000010199  | -              | -                                                                                                 | 3.603453364 | 1.841464189  | -0.28008167  | 1.734465973  |
| ENSRLOG00000014802  | si.dkey-183n2  | si.dkey-183n2.15 [Source:ZFIN,Acc:ZDB-GENE-041001-160]                                            | 6.337020533 | 1.046020807  | -2.69261359  | 2.5988701    |
| ENSRLOG00000014201  | samen1a        | SAM domain, SH3 domain and nuclear localisation signals 1a [Source:ZFIN,Acc:ZDB-GENE-030131-8639] | 4.981287462 | 1.984012529  | -2.232470147 | 0.765289984  |
| ENSRLOG00000016804  | tenp           | tenn binding protein [Source:NCBI gene,Acc:101157902]                                             | 3.823663271 | 0.394748929  | -1.714273381 | 1.715618367  |
| ENSRLOG00000000311  | -              | -                                                                                                 | 5.915229207 | 2.419171428  | -1.25899917  | 2.224748246  |
| ENSRLOG00000002008  | sgoa1          | suppressor of glucose, autophagy associated 1 [Source:ZFIN,Acc:ZDB-GENE-090313-188]               | 3.680745216 | 0.180792558  | -1.502734166 | 1.99770281   |
| ENSRLOG00000013782  | frzb           | frazzled related protein [Source:ZFIN,Acc:ZDB-GENE-990715-11]                                     | 3.066600418 | 2.331430377  | -1.177273237 | -0.441618255 |
| ENSRLOG00000004031  | MYOF           | myofibrin [Source:HGNC Symbol,Acc:HGNC:3656]                                                      | 3.715608193 | 1.524094934  | -1.282370038 | 0.909628076  |
| ENSRLOG00000008512  | hao2           | hydroxyacid oxidase 2 (long chain) [Source:ZFIN,Acc:ZDB-GENE-040426-1239]                         | 7.288125433 | 1.336203432  | -2.982338804 | 2.970085771  |
| ENSRLOG00000010350  | ker5           | intermediate filament protein QN3 [Source:NCBI gene,Acc:101167707]                                | 5.052849942 | 0.055527141  | -2.567325756 | 2.43048181   |
| ENSRLOG00000015958  | mhm1           | muscleblind-like splicing regulator 1 [Source:ZFIN,Acc:ZDB-GENE-060929-704]                       | 3.896112438 | 1.443381687  | -1.722568228 | 0.732647339  |
| ENSRLOG00000014634  | et8aa1         | 5T8 alpha-N-acetyl-neuraminidase alpha-2B-sialyltransferase 1 [Source:ZFIN,Acc:ZDB-GENE-051005-1] | 3.252700713 | 1.552043154  | -1.221824493 | 0.479319562  |
| ENSRLOG00000016551  | zpc158846      | zpc158846 [Source:ZFIN,Acc:ZDB-GENE-070209-50]                                                    | 4.459724259 | -0.364777084 | -2.587248984 | 2.237738169  |
| ENSRLOG00000017369  | -              | -                                                                                                 | 4.527617215 | 2.38894653   | 0.5647763    | 2.198686957  |
| ENSRLOG00000017036  | -              | -                                                                                                 | 7.13747335  | 0.346745587  | -5.547586123 | 1.243628743  |
| ENSRLOG00000016665  | ofml2ba        | olfactomedin like 2Ba [Source:ZFIN,Acc:ZDB-GENE-041014-329]                                       | 5.660088781 | 1.238954915  | -1.642153884 | 2.779469091  |
| ENSRLOG00000003275  | -              | -                                                                                                 | 3.520694774 | 0.505426434  | -0.09198988  | 2.923762257  |
| ENSRLOG00000015087  | si.dkey-109a1  | si.dkey-109a1 [LOC101172797] [Source:NCBI gene,Acc:101172797]                                     | 3.515183331 | 0.6892272    | -1.491658411 | 1.334782475  |
| ENSRLOG00000013086  | scube3         | signal peptide, CUB domain, EGF-like 3 [Source:ZFIN,Acc:ZDB-GENE-060717-1]                        | 3.590501376 | 1.428395941  | -2.231078523 | -0.066488077 |
| ENSRLOG00000006317  | -              | -                                                                                                 | 6.420429115 | 3.11018277   | -0.616331361 | 2.694022527  |
| ENSRLOG000000002372 | si.ch211-93g2  | putative methyltransferase DDB_G0268948 [Source:NCBI gene,Acc:101159172]                          | 4.654053188 | -0.057097945 | -4.011667085 | 0.694968369  |
| ENSRLOG00000000985  | slco2a1        | solute carrier organic anion transporter family, member 2A1 [Source:ZFIN,Acc:ZDB-GENE-060606-3]   | 3.869148834 | 1.739782387  | -3.042213249 | -0.912359547 |
| ENSRLOG00000002431  | -              | -                                                                                                 | 7.237331334 | 2.814664365  | -3.036516299 | 1.386632423  |
| ENSRLOG00000012361  | ALPK1          | alpha kinase 1 [Source:HGNC Symbol,Acc:HGNC:20917]                                                | 4.308323865 | 1.613819637  | -1.419315444 | 1.271614448  |
| ENSRLOG00000008976  | esrp1          | epithelial splicing regulatory protein 1 [Source:ZFIN,Acc:ZDB-GENE-070112-1732]                   | 3.388034523 | -0.025852932 | -1.428944762 | 1.985428414  |
| ENSRLOG000000003862 | fn1b           | fibrinectin 1b [Source:ZFIN,Acc:ZDB-GENE-030131-6543]                                             | 4.865386579 | 0.413072311  | -3.893585518 | 0.559213809  |
| ENSRLOG00000005829  | col5a3a        | collagen, type V, alpha 3a [Source:ZFIN,Acc:ZDB-GENE-030131-968]                                  | 4.735875385 | 2.316642635  | -0.853533886 | 1.566180547  |
| ENSRLOG00000012093  | lcl1           | four pointed box 1 [Source:NCBI gene,Acc:101170899]                                               | 3.071348576 | 1.435994891  | -0.835822212 | 0.800016621  |
| ENSRLOG00000006439  | mx4            | MAX dimerization protein 4 [Source:ZFIN,Acc:ZDB-GENE-050208-44]                                   | 5.061537794 | 2.261716314  | -0.389394067 | 2.410911379  |

|                     |                 |                                                                                                                                    |             |              |              |              |
|---------------------|-----------------|------------------------------------------------------------------------------------------------------------------------------------|-------------|--------------|--------------|--------------|
| ENSORLG00000014162  | wwa11           | von Willebrand factor A domain containing 11 [Source:ZFIN;Acc:ZDB-GENE-141211-58]                                                  | 3.91860014  | -0.28269577  | -1.994112198 | 2.207658221  |
| ENSORLG00000006426  | zpcr171592      | zpcr171592 [Source:ZFIN;Acc:ZDB-GENE-080220-23]                                                                                    | 7.708085021 | 2.388088241  | -8.059898966 | -2.739412255 |
| ENSORLG00000017121  | dhv3b           | dehydrogenase/reductase 3 [Source:NCBI;Gene:Acc:101159580]                                                                         | 3.619859359 | 2.21909411   | -1.946774347 | -0.545439796 |
| ENSORLG00000016942  | qchfr           | GTP cyclohydrolase 1 feedback regulator [Source:ZFIN;Acc:ZDB-GENE-040426-1731]                                                     | 5.03882981  | 2.912160681  | -1.545191041 | 0.581956738  |
| ENSORLG00000008012  | zgc:101583      | magnesium transporter NIPAZ [Source:NCBI;Gene:Acc:101155561]                                                                       | 3.313070875 | 2.070672086  | 0.909596384  | 2.152479609  |
| ENSORLG00000010100  | baq2            | BCL2 associated athanogene 2 [Source:NCBI;Gene:Acc:101155139]                                                                      | 4.024853672 | 2.681279587  | 0.349353808  | 1.693412962  |
| ENSORLG00000005621  | -               | DEF6, guanine nucleotide exchange factor [Source:NCBI;Gene:Acc:101162599]                                                          | 4.667573791 | 1.815645853  | -0.280007646 | 2.572405174  |
| ENSORLG00000006652  | def6a           | Ras association (RalGDS/AF-6) domain family member 2a [Source:ZFIN;Acc:ZDB-GENE-040912-124]                                        | 3.592670766 | 2.281792606  | 0.360248311  | 1.671611874  |
| ENSORLG00000002844  | rasf2a          | -                                                                                                                                  | 4.490494489 | 1.990262742  | -0.189423475 | 2.311292906  |
| ENSORLG00000002501  | -               | -                                                                                                                                  | 5.903923266 | 0.508623717  | -6.068582356 | -0.610799074 |
| ENSORLG00000016428  | -               | bile salt -activated lipase-like [Source:NCBI;Gene:Acc:101174676]                                                                  | 6.183049761 | 1.57612217   | -4.810948029 | -0.203536051 |
| ENSORLG00000006281  | ack2            | phosphoenolpyruvate carboxykinase 2, mitochondrial [Source:NCBI;Gene:Acc:101158145]                                                | 3.265679773 | 0.092162479  | -2.768800011 | 0.405202106  |
| ENSORLG00000007902  | hoac12a         | homeobox protein Hox-C12a [Source:NCBI;Gene:Acc:101170268]                                                                         | 3.866480597 | 0.075003798  | -4.468793712 | -0.676830569 |
| ENSORLG00000007495  | ERMP1           | endoplasmic reticulum metalloproteinase 1 [Source:HGNC;Symbol:HGNC:23703]                                                          | 4.096468942 | 1.517729029  | -1.406617832 | 1.172606345  |
| ENSORLG00000004256  | emp1            | epithelial membrane protein 1 [Source:ZFIN;Acc:ZDB-GENE-070822-2]                                                                  | 3.549150919 | 2.020821594  | -0.941595418 | 0.587218887  |
| ENSORLG00000016624  | -               | -                                                                                                                                  | 5.549173265 | 3.095530288  | -1.875605084 | 0.578552027  |
| ENSORLG00000003247  | foxd1           | Oryzias latipes forkhead box D1 (foxd1), mRNA [Source:RefSeq; mRNA:Acc:NM_001160452]                                               | 15.69788521 | 10.28146644  | -5.462715463 | -0.045834351 |
| ENSORLG00000004356  | si:ch211-276f1  | glucose-fructose oxidoreductase domain-containing protein 1 [Source:NCBI;Gene:Acc:101174141]                                       | 4.107160357 | 1.606588688  | -0.966569281 | 1.534217622  |
| ENSORLG00000017006  | -               | -                                                                                                                                  | 5.348600883 | 2.417790088  | -2.548601988 | 0.382893589  |
| ENSORLG00000016373  | twist3          | Oryzias latipes twist-related protein 2-like (LOC101185973), mRNA [Source:RefSeq; mRNA:Acc:NM_001390012]                           | 5.648500059 | -2.4557753   | -4.61393852  | 3.490829865  |
| ENSORLG00000011921  | -               | -                                                                                                                                  | 3.719669037 | 1.766696827  | -0.365568847 | 1.587888363  |
| ENSORLG00000010556  | ctnn2           | catenin 2 [Source:ZFIN;Acc:ZDB-GENE-390630-121]                                                                                    | 5.645665104 | 1.807491533  | -0.9293337   | 3.109303498  |
| ENSORLG00000016995  | -               | -                                                                                                                                  | 3.915101951 | 1.19599539   | -0.415917519 | 2.405911726  |
| ENSORLG00000001490  | spny4           | sprouty homolog 4 (Drosophila) [Source:ZFIN;Acc:ZDB-GENE-010603-2]                                                                 | 7.520409181 | 4.487721519  | -1.204327249 | 1.828850574  |
| ENSORLG00000016581  | esrb            | estrogen-related receptor beta [Source:ZFIN;Acc:ZDB-GENE-040616-2]                                                                 | 17.11569639 | 10.55897549  | -2.477456588 | 4.87973655   |
| ENSORLG00000014146  | ENTPD2          | ectonucleoside triphosphate diphosphohydrolase 2 [Source:HGNC;Symbol:HGNC:3364]                                                    | 4.345379155 | 1.132135707  | -0.343418987 | 2.870310874  |
| ENSORLG00000015532  | pkdccb          | protein kinase domain containing, cytoplasmic b [Source:ZFIN;Acc:ZDB-GENE-130530-599]                                              | 3.799533712 | 1.841383388  | -2.412930836 | -0.454295585 |
| ENSORLG00000016908  | GREM1 (1 of 2)  | gremlin 1, DAN family BMP antagonist [Source:HGNC;Symbol:HGNC:2001]                                                                | 4.058075985 | 2.026219677  | -2.767304688 | -0.734963767 |
| ENSORLG00000016585  | -               | -                                                                                                                                  | 3.548072816 | 1.923896017  | -0.537880601 | 1.086780957  |
| ENSORLG00000001278  | plekha7a        | pleckstrin homology domain containing, family A member 7a [Source:ZFIN;Acc:ZDB-GENE-050419-75]                                     | 3.806614855 | 1.177390926  | -1.198779787 | 1.430929891  |
| ENSORLG00000013479  | lrm94tb         | FERM domain containing 4B [Source:ZFIN;Acc:ZDB-GENE-100921-74]                                                                     | 3.226525646 | 0.737933796  | -1.499470634 | 0.989660529  |
| ENSORLG00000020213  | cdm             | claudin 1 [Source:ZFIN;Acc:ZDB-GENE-010328-9]                                                                                      | 7.015868657 | 1.73555818   | -5.86301023  | -0.587199188 |
| ENSORLG00000020296  | FBIN1 (1 of 2)  | fibulin 1 [Source:HGNC;Symbol:HGNC:3600]                                                                                           | 3.97399029  | 0.532417758  | -4.06236771  | -0.564310697 |
| ENSORLG00000004781  | tns1b           | tensin 1b [Source:ZFIN;Acc:ZDB-GENE-030131-6933]                                                                                   | 4.121745436 | 1.1711767432 | -1.25068842  | 1.169974935  |
| ENSORLG00000011664  | mfp5            | myofibrillar-associated protein 2 [Source:NCBI;Gene:Acc:101167732]                                                                 | 3.656705943 | 2.841362638  | -1.397249606 | -0.581376241 |
| ENSORLG00000002810  | -               | -                                                                                                                                  | 5.355331967 | 0.58335906   | -0.665490873 | 4.106966986  |
| ENSORLG00000016589  | laah            | fatty acid amide hydrolase [Source:ZFIN;Acc:ZDB-GENE-070919-3]                                                                     | 4.458460765 | 0.106321514  | -2.822313567 | 1.530310612  |
| ENSORLG00000001873  | TENT5A          | terminal nucleotidyltransferase 5A [Source:NCBI;Gene:Acc:101158475]                                                                | 5.106858282 | 1.593478514  | -1.096527315 | 2.417338948  |
| ENSORLG000000018182 | -               | -                                                                                                                                  | 4.315257347 | 1.342308514  | -1.267759633 | 1.705675075  |
| ENSORLG000000013889 | -               | -                                                                                                                                  | 3.537527611 | 2.122246621  | -0.995291761 | 0.420474323  |
| ENSORLG000000013582 | -               | -                                                                                                                                  | 7.49858101  | 1.546688853  | -6.370825912 | -0.418501767 |
| ENSORLG000000011150 | bbox1           | butyrobetaine (gamma)-2-oxoglutarate dioxygenase (gamma-butyrobetaine hydroxylase) 1 [Source:ZFIN;Acc:ZDB-GENE-050417-218]         | 3.95894118  | 0.473794345  | -2.133534362 | 1.352097243  |
| ENSORLG00000006259  | mmp1a           | multiple inactivator-polyphosphate phosphatase 1a [Source:ZFIN;Acc:ZDB-GENE-060929-1184]                                           | 4.601551324 | 0.036756316  | -2.800747317 | 1.764532928  |
| ENSORLG00000009808  | -               | -                                                                                                                                  | 3.146576836 | 1.589148917  | 0.021613047  | 1.579546545  |
| ENSORLG000000012182 | slc9a3r1b       | solute carrier family 9, subfamily A (NHE3, cation proton antiporter 3), member 3 regulator 1b [Source:ZFIN;Acc:ZDB-GENE-170530-6] | 4.95095284  | 1.828955966  | -1.884271731 | 1.237851401  |
| ENSORLG00000000487  | rs8b3a          | RPS8-like 3a [Source:ZFIN;Acc:ZDB-GENE-091204-460]                                                                                 | 4.30057218  | -1.093588391 | -3.29049925  | 2.104145208  |
| ENSORLG00000011646  | RASA2           | RAS p21 protein activator 2 [Source:HGNC;Symbol:HGNC:8872]                                                                         | 3.957335298 | 1.945109624  | 0.44797963   | 2.460688201  |
| ENSORLG000000013413 | pip5k1ba        | phosphatidylinositol-4-phosphate 5-kinase, type 1, beta 1 [Source:ZFIN;Acc:ZDB-GENE-041010-81]                                     | 3.56756648  | 0.965348733  | -2.055052622 | 0.547649761  |
| ENSORLG000000016352 | si:dkcy-256h2   | si:dkcy-256h2.1 [Source:ZFIN;Acc:ZDB-GENE-030131-8466]                                                                             | 3.720947538 | 1.270973574  | -0.385250218 | 2.06520835   |
| ENSORLG000000010191 | nr2f1a          | nuclear receptor subfamily 2, group F, member 1a [Source:ZFIN;Acc:ZDB-GENE-380526-115]                                             | 3.127875621 | 2.437544602  | -1.69353355  | -1.002717956 |
| ENSORLG00000002303  | -               | -                                                                                                                                  | 16.6994368  | 10.96260686  | -3.872653777 | 1.86515079   |
| ENSORLG000000008785 | -               | -                                                                                                                                  | 5.033893979 | 3.494041892  | -0.464489286 | 1075849704   |
| ENSORLG000000010290 | cpolce          | procollagen C-endopeptidase enhancer A [Source:ZFIN;Acc:ZDB-GENE-041014-370]                                                       | 4.604069371 | 1.623797028  | -4.148510213 | -1.167752824 |
| ENSORLG00000004584  | -               | -                                                                                                                                  | 15.9482835  | 10.85596635  | -0.532296748 | 4.567033612  |
| ENSORLG000000013935 | -               | -                                                                                                                                  | 4.126359829 | 1.750004317  | -1.105729649 | 1.271110006  |
| ENSORLG00000000944  | mf2             | ring finger protein, transmembrane 2 [Source:NCBI;Gene:Acc:101163823]                                                              | 3.790827296 | 1.226771136  | -0.415882515 | 2.148659736  |
| ENSORLG000000018185 | lox3b           | lysoyl oxidase-like 3b [Source:ZFIN;Acc:ZDB-GENE-030131-8240]                                                                      | 4.169735585 | 1.293556838  | -1.407128082 | 1.469536156  |
| ENSORLG00000011244  | ank1b           | ankyrin 1, erythrocytic b [Source:ZFIN;Acc:ZDB-GENE-091113-6]                                                                      | 5.531184224 | -7.573896238 | -9.015517352 | 4.090068833  |
| ENSORLG00000004681  | ARHGAP6         | Rho GTPase activating protein 6 [Source:HGNC;Symbol:HGNC:876]                                                                      | 4.209268382 | 1.785237908  | -2.417337473 | 0.007177996  |
| ENSORLG000000010798 | -               | -                                                                                                                                  | 4.79617438  | -0.796882442 | -2.817601456 | 2.77993275   |
| ENSORLG000000010562 | -               | -                                                                                                                                  | 3.984543836 | 0.323846136  | -3.833988617 | -0.172786624 |
| ENSORLG000000014343 | d3              | inhibitor of DNA binding 3, HLH protein [Source:NCBI;Gene:Acc:101164112]                                                           | 3.976392992 | 2.26382511   | -2.65968391  | -0.946630981 |
| ENSORLG000000009810 | efna1b (1 of 2) | efnalin A1 [Source:NCBI;Gene:Acc:101169993]                                                                                        | 5.033159163 | 1.281535299  | -1.467096682 | 2.285012117  |
| ENSORLG000000007386 | mat1a           | S-adenosylmethionine synthase [Source:NCBI;Gene:Acc:101160342]                                                                     | 4.670252527 | 0.710464837  | -2.816481352 | 1.143794536  |
| ENSORLG000000013755 | ctfb            | core-binding factor, beta subunit [Source:ZFIN;Acc:ZDB-GENE-360526-440]                                                            | 5.042678982 | 2.688174065  | -1.888334753 | 0.466655685  |
| ENSORLG000000003871 | -               | -                                                                                                                                  | 3.258842431 | 2.202145892  | 0.168576713  | 1.225758305  |
| ENSORLG00000002101  | AFAP11 (1 of 2) | actin filament associated protein 1 like 1 [Source:HGNC;Symbol:HGNC:2674]                                                          | 3.693083617 | 2.637037366  | 1.301984095  | 2.358514691  |
| ENSORLG000000005650 | ca6             | carbonic anhydrase VI [Source:ZFIN;Acc:ZDB-GENE-030131-7091]                                                                       | 4.570691179 | 1.130642056  | -2.814951003 | 0.625582384  |
| ENSORLG000000007828 | si:ch211-137f2  | si:ch211-137f2.10 [Source:ZFIN;Acc:ZDB-GENE-060526-34]                                                                             | 4.881587993 | 2.105409658  | -0.973278691 | 1.803384571  |

|                     |                 |                                                                                                                      |              |              |              |              |
|---------------------|-----------------|----------------------------------------------------------------------------------------------------------------------|--------------|--------------|--------------|--------------|
| ENSORLG00000017598  | pkra            | protein kinase, interferon-inducible double stranded RNA dependent activator [Source:ZFIN;Acc:ZDB-GENE-050309-206]   | 6.21392501   | 3.96875078   | -1.179326341 | 1.06633531   |
| ENSORLG00000017476  | l1pr4           | sphingosine-1-phosphate receptor 4 [Source:ZFIN;Acc:ZDB-GENE-050506-8]                                               | 16.44791233  | 11.98262287  | -2.829714404 | 1.636041645  |
| ENSORLG00000017066  | slpl            | alkaline phosphatase, liver/kidney [Source:ZFIN;Acc:ZDB-GENE-040420-1]                                               | 4.213965882  | 1.999016507  | -0.682677222 | 1.532757013  |
| ENSORLG00000015714  | tagln           | transgelin [Source:NCBI;gene:Acc:101169057]                                                                          | 4.196157138  | 2.974096245  | -1.02940372  | 0.195142175  |
| ENSORLG00000008671  | st3gal5         | ST3 beta-galactoside alpha 2-3-sialyltransferase 5 [Source:ZFIN;Acc:ZDB-GENE-060322-1]                               | 3.120264914  | 1.460635413  | -0.561239442 | 1.098875167  |
| ENSORLG00000016685  | -               | -                                                                                                                    | 3.915094536  | 2.000296282  | -1.268851106 | 0.646432938  |
| ENSORLG00000007837  | nr1d4a          | nuclear receptor subfamily 1, group D, member 4a [Source:ZFIN;Acc:ZDB-GENE-080403-3]                                 | 3.805115883  | 1.370501622  | -0.289966942 | 2.145133267  |
| ENSORLG00000000416  | -               | -                                                                                                                    | 3.334449927  | 1.194794254  | 0.198780018  | 2.113688569  |
| ENSORLG00000001080  | xch             | xanthine dehydrogenase [Source:ZFIN;Acc:ZDB-GENE-070719-9]                                                           | 5.58024666   | -1.387756817 | -3.53933416  | 3.429154948  |
| ENSORLG00000006880  | ctprh           | protein tyrosine phosphatase, receptor type, h [Source:ZFIN;Acc:ZDB-GENE-091118-90]                                  | 4.09391453   | 0.186736046  | -1.919522591 | 1.988140508  |
| ENSORLG00000014439  | CEL             | bile salt-activated lipase [Source:NCBI;gene:Acc:101172670]                                                          | 6.104418832  | 1.656949649  | -4.898853562 | -0.450899506 |
| ENSORLG00000007800  | -               | -                                                                                                                    | 4.004159582  | 1.03992458   | -0.994478011 | 1.970293493  |
| ENSORLG00000003253  | gstm            | glutathione S-transferase (L-arginine:glycine amidinotransferase) [Source:ZFIN;Acc:ZDB-GENE-021015-1]                | 6.738761245  | 2.773884501  | -4.275748792 | -0.310386403 |
| ENSORLG00000002221  | -               | -                                                                                                                    | 4.40685237   | 0.497223245  | -1.149088289 | 2.761025819  |
| ENSORLG00000003797  | MPP1E1          | metallophosphoesterase 1 [Source:HGNC;Symbol:Acc:HGNC:15988]                                                         | 5.007638366  | -11.39973721 | -1.798549488 | 14.60933344  |
| ENSORLG00000016604  | si:dkey-30e9.7  | si:dkey-30e9.7 [Source:ZFIN;Acc:ZDB-GENE-131121-540]                                                                 | 3.517326638  | 1.295490351  | 0.304638663  | 2.526961252  |
| ENSORLG00000011353  | snrb            | spectrin, beta, erythrocytic [Source:ZFIN;Acc:ZDB-GENE-000906-1]                                                     | 6.115783608  | 2.384753811  | -1.413347836 | 2.318170103  |
| ENSORLG00000001820  | rsal3           | RAS protein activator like 3 [Source:ZFIN;Acc:ZDB-GENE-101130-3]                                                     | 4.286408649  | 0.665601314  | -3.150682249 | 0.470609666  |
| ENSORLG00000011535  | pcdh12          | protocadherin 12 [Source:ZFIN;Acc:ZDB-GENE-140106-128]                                                               | 4.248327786  | 2.191884264  | -1.208072835 | 0.848855477  |
| ENSORLG00000012606  | tap2t           | transporter associated with antigen processing, subunit type 1, telost specific [Source:ZFIN;Acc:ZDB-GENE-130531-48] | 3.728650359  | 1.986119911  | 0.120334803  | 1.863350309  |
| ENSORLG00000007617  | -               | -                                                                                                                    | 6.241978563  | 3.585374976  | -2.665440719 | -0.008368212 |
| ENSORLG00000015802  | tmoxd4          | tropomodulin 4 [Source:NCBI;gene:Acc:101166163]                                                                      | 3.722794587  | 0.51787778   | -3.104010978 | 0.101389848  |
| ENSORLG00000013113  | si:dkey-65d13.3 | si:dkey-65d13.3 [Source:ZFIN;Acc:ZDB-GENE-141216-308]                                                                | 5.607517829  | 2.187721585  | -2.388429035 | 1.031855245  |
| ENSORLG00000009479  | mafba           | v-maf avian musculoaponeurotic fibrosarcoma oncogene homolog Ba [Source:ZFIN;Acc:ZDB-GENE-980576-516]                | 3.703272786  | 1.164656603  | -2.42044637  | 0.118654617  |
| ENSORLG00000016537  | aldh8a1         | aldehyde dehydrogenase 8 family member A1 [Source:NCBI;gene:Acc:101173520]                                           | 5.9530506    | -0.181846478 | -3.721487203 | 2.413894887  |
| ENSORLG00000003322  | -               | -                                                                                                                    | 3.694290736  | 0.149933356  | -2.364183949 | 1.180658157  |
| ENSORLG00000014464  | -               | bile salt-activated lipase [Source:NCBI;gene:Acc:101172916]                                                          | 5.837388568  | -0.3290286   | -4.574438022 | 1.592463914  |
| ENSORLG00000000881  | -               | -                                                                                                                    | 3.516698006  | 1.335723556  | -0.771980407 | 1.409479348  |
| ENSORLG00000016793  | rgs19           | regulator of G-protein signaling 17 [Source:NCBI;gene:Acc:1011588610]                                                | 4.097104621  | 0.67683292   | -1.576647795 | 1.844108789  |
| ENSORLG00000003825  | dhx58           | DXH-box helicase 58 [Source:NCBI;gene:Acc:101162460]                                                                 | 4.379407761  | 0.939479999  | -1.915182082 | 1.525230606  |
| ENSORLG00000015920  | -               | -                                                                                                                    | 4.0527815    | 1.856724688  | -0.632521849 | 1.564207078  |
| ENSORLG0000002044   | hxf5            | HLH homeobox 5 [Source:NCBI;gene:Acc:101166400]                                                                      | 4.775563745  | 1.944058583  | -0.205297114 | 2.62669319   |
| ENSORLG00000005151  | ZBTB5           | zinc finger and BTB domain containing 5 [Source:HGNC;Symbol:Acc:HGNC:23836]                                          | 3.227560267  | 1.340122848  | -0.181665492 | 1.706256625  |
| ENSORLG00000004953  | plekha1a        | pleckstrin homology domain-containing family A member 1 [Source:NCBI;gene:Acc:101161669]                             | 3.353556362  | 1.59970243   | 0.58040543   | 2.33474464   |
| ENSORLG00000000242  | -               | -                                                                                                                    | 5.039724605  | 1.032190982  | -1.53373686  | 2.474244452  |
| ENSORLG000000003915 | ptges           | prostaglandin G synthase [Source:NCBI;gene:Acc:101162789]                                                            | 4.356265281  | 2.194472253  | -0.098832491 | 2.06345429   |
| ENSORLG00000016646  | lyco1a          | LYC and coiled-coil domain containing 1a [Source:ZFIN;Acc:ZDB-GENE-110411-276]                                       | 3.24654922   | -0.505999764 | -1.861117183 | 1.891916711  |
| ENSORLG00000001380  | sh3bp4          | SH3 domain binding protein 4 [Source:NCBI;gene:Acc:101160807]                                                        | 3.268414831  | 2.005243947  | 0.840623319  | 2.104279157  |
| ENSORLG00000012877  | alc25a25b       | calcium-binding mitochondrial carrier protein SCAMC-2-B [Source:NCBI;gene:Acc:101157381]                             | 3.640235028  | 1.470778348  | 0.060109757  | 2.230052571  |
| ENSORLG00000000098  | zbtb2b          | zinc finger E-box binding homeobox 2 [Source:NCBI;gene:Acc:101172786]                                                | 3.475486882  | 1.656039045  | -2.248507293 | -0.42857485  |
| ENSORLG000000001317 | isowahaa        | isowahawa ankyrin repeat domain family member Aa [Source:ZFIN;Acc:ZDB-GENE-100910-3]                                 | 3.748982655  | -0.198219178 | -1.633719519 | 2.319961619  |
| ENSORLG00000012493  | gls2a           | glutaminase 2a (liver, mitochondrial) [Source:ZFIN;Acc:ZDB-GENE-081105-57]                                           | 5.026634129  | 0.057244988  | -15.69319916 | -10.72382304 |
| ENSORLG00000004520  | hsd11b11a.1     | hydroxysteroid 11-beta dehydrogenase 1 like [Source:NCBI;gene:Acc:10049405]                                          | 3.782407527  | -0.773629506 | -2.267139243 | 2.289381352  |
| ENSORLG00000012382  | adcy6a          | adenylylate cyclase 6a [Source:ZFIN;Acc:ZDB-GENE-060221-1]                                                           | 4.122411512  | 1.211290302  | -1.380753651 | 1.530852951  |
| ENSORLG00000017725  | bd10            | B cell CLL/lymphoma 10 [Source:ZFIN;Acc:ZDB-GENE-100219-2]                                                           | 4.386626053  | 0.881144534  | -2.417649513 | 1.088317512  |
| ENSORLG00000005044  | amh             | anti-Müllerian hormone [Source:ZFIN;Acc:ZDB-GENE-050706-192]                                                         | 4.805806138  | 2.351218842  | -1.066811671 | 1.388226507  |
| ENSORLG00000010779  | ghdc2           | ghen domain containing 2 [Source:ZFIN;Acc:ZDB-GENE-140106-69]                                                        | 4.27400437   | 2.016096952  | -2.072621149 | 0.185807882  |
| ENSORLG00000017717  | gdn10b          | gdnalin 10 [Source:NCBI;gene:Acc:101166512]                                                                          | 17.2190864   | 0            | -17.2190862  | 0            |
| ENSORLG00000013173  | alc20a1a        | solute carrier family 20, member 1a [Source:ZFIN;Acc:ZDB-GENE-040426-2217]                                           | 5.7038202654 | 0.796387606  | -5.203026254 | -0.295109752 |
| ENSORLG00000013546  | dhx7cb          | dehydrogenase/reductase (SDR family) member 7Cb [Source:ZFIN;Acc:ZDB-GENE-050522-278]                                | 15.71664694  | 11.19295236  | -1.071570585 | 3.452590803  |
| ENSORLG00000016148  | parp12a         | poly (ADP-ribose) polymerase family, member 12a [Source:ZFIN;Acc:ZDB-GENE-050419-6]                                  | 3.007652115  | -0.080319163 | -1.758684271 | 1.329771926  |
| ENSORLG00000016875  | naga            | N-acetylgalactosaminidase, alpha [Source:ZFIN;Acc:ZDB-GENE-051113-256]                                               | 3.451162327  | 0.25635924   | -2.684800079 | 0.510487918  |
| ENSORLG00000017488  | roc2            | amine oxidase, copper containing 2 [Source:ZFIN;Acc:ZDB-GENE-050320-133]                                             | 3.485099568  | 2.102991969  | -2.611237768 | -1.228645173 |
| ENSORLG00000005491  | -               | -                                                                                                                    | 4.825183491  | 2.758348813  | 0.211252667  | 2.278572539  |
| ENSORLG00000002242  | cypl7a2         | Cyp17a2-like steroid 17-alpha-hydroxylase/17,20 lyase-like (cyp17a2) mRNA [Source:RefSeq; mRNA:Acc:NM_00278876]      | 5.352420955  | 2.062826538  | -0.673941641 | 2.616137713  |
| ENSORLG00000005620  | KLF6            | Kruppel like factor 6 [Source:HGNC;Symbol:Acc:HGNC:2233]                                                             | 3.752229229  | 1.091604502  | -1.81773266  | 0.843336535  |
| ENSORLG00000003404  | cavatb4         | carvalbumin beta [Source:NCBI;gene:Acc:101173896]                                                                    | 5.278239454  | -1.666534679 | -8.22676398  | -1.281004433 |
| ENSORLG00000015238  | -               | -                                                                                                                    | 3.57030767   | 1.569292988  | 0.18115419   | 2.182653658  |
| ENSORLG00000003520  | rem2b           | Fnrl1 related extracellular matrix protein 2b [Source:ZFIN;Acc:ZDB-GENE-081119-4]                                    | 4.063763967  | 2.407296854  | -0.508450745 | 1.148497995  |
| ENSORLG00000012314  | rd1a            | rho-related GTP-binding protein Rho6 [Source:NCBI;gene:Acc:101157215]                                                | 3.678537651  | 0.878630013  | -0.117521654 | 2.682871569  |
| ENSORLG00000006338  | -               | -                                                                                                                    | 3.584410586  | 2.301298351  | 0.327168241  | 1.610765887  |
| ENSORLG00000006095  | nr2a            | neuronalin 2a [Source:ZFIN;Acc:ZDB-GENE-070615-10]                                                                   | 3.262995363  | 0.101194232  | -2.014186609 | 1.148166458  |
| ENSORLG00000015818  | -               | -                                                                                                                    | 3.494518831  | -0.447260617 | -2.128953474 | 1.813310859  |
| ENSORLG00000012173  | pk2a            | pyruvate dehydrogenase kinase, isozyme 2a [Source:ZFIN;Acc:ZDB-GENE-120910-1]                                        | 3.261192995  | 1.090575905  | -0.965517164 | 1.205585321  |
| ENSORLG00000016446  | -               | -                                                                                                                    | 4.216130222  | 2.374397472  | -2.701410946 | -0.859192138 |

|  |                    |                |                                                                                                                        |             |              |              |              |
|--|--------------------|----------------|------------------------------------------------------------------------------------------------------------------------|-------------|--------------|--------------|--------------|
|  | ENSORLG00000011270 | nr1h4          | nuclear receptor subfamily 1 group H member 4<br>[Source:NCBI geneAcc:101166124]                                       | 3.95304312  | -0.989108477 | -1.958875822 | 2.983721912  |
|  | ENSORLG00000015784 | canrk2n1a      | calcium/calmodulin dependent protein kinase II inhibitor 2 [Source:NCBI geneAcc:101167903]                             | 4.134709315 | 0.856523722  | -1.060573349 | 2.218098001  |
|  | ENSORLG00000009970 | CCDC177        | coiled-coil domain containing 177 [Source:HGNC Symbol:Acc:HGNC:23243]                                                  | 3.013512082 | 0.428332107  | -1.385513438 | 1.200160961  |
|  | ENSORLG00000014976 | -              | -                                                                                                                      | 5.043437161 | 0.762955855  | -2.843280729 | 1.437686225  |
|  | ENSORLG00000005451 | egr1           | early growth response 1 [Source:ZFIN:Acc.ZDB-GENE-98526-320]                                                           | 5.305593447 | 1.43579804   | -1.429394737 | 2.440895565  |
|  | ENSORLG00000002566 | dic13a2        | solute carrier family 13 (sodium-dependent dicarboxylate transporter), member 2 [Source:ZFIN:Acc.ZDB-GENE-040426-2389] | 5.210747859 | -0.283065823 | -3.686251691 | 1.8004497    |
|  | ENSORLG00000016602 | -              | -                                                                                                                      | 3.599861454 | 0.915157508  | -2.600887915 | 0.084119462  |
|  | ENSORLG00000009627 | ntf5c20l       | 5'-nucleotidase, cytosolic II, like 1 [Source:ZFIN:Acc.ZDB-GENE-031006-8]                                              | 7.145605655 | 1.993365001  | -0.831042188 | 4.321690125  |
|  | ENSORLG00000015940 | h1b            | H1-1 proto-oncogene, ETS transcription factor b [Source:ZFIN:Acc.ZDB-GENE-031114-3]                                    | 5.049464749 | 1.999796795  | -2.633591939 | 0.416561568  |
|  | ENSORLG00000013704 | ncoa3          | nuclear receptor coactivator 3 [Source:ZFIN:Acc.ZDB-GENE-051107-8]                                                     | 3.493188434 | 1.47526823   | -0.13557476  | 1.882830321  |
|  | ENSORLG00000017833 | -              | -                                                                                                                      | 5.958987794 | 1.558075464  | -1.487328745 | 2.914069501  |
|  | ENSORLG00000001145 | slc22a4        | solute carrier family 22 (organic cation/zwitterion transporter), member 4 [Source:ZFIN:Acc.ZDB-GENE-040426-1517]      | 5.358340598 | 1.188736562  | -1.021130971 | 3.14895192   |
|  | ENSORLG00000004552 | -              | -                                                                                                                      | 15.7122367  | 13.18227795  | -1.75634884  | 0.813064246  |
|  | ENSORLG00000008610 | arhgef3l       | Rho guanine nucleotide exchange factor (GEF) 3, like [Source:ZFIN:Acc.ZDB-GENE-050922-85]                              | 4.136291689 | 1.537635572  | -1.670318245 | 0.928821876  |
|  | ENSORLG00000016399 | agtb           | serine - pyruvate aminotransferase [Source:NCBI geneAcc:101151325]                                                     | 7.05397491  | 1.175830319  | -2.890616151 | 2.998027957  |
|  | ENSORLG00000017115 | -              | -                                                                                                                      | 6.48025518  | -11.17997749 | -3.788529226 | 13.94271391  |
|  | ENSORLG00000016336 | -              | -                                                                                                                      | 8.248683112 | -7.50619986  | -7.125387775 | -1.384239575 |
|  | ENSORLG00000000398 | agrp           | agouti related neuropeptide [Source:ZFIN:Acc.ZDB-GENE-040817-1]                                                        | 7.69779008  | 2.252281674  | -6.353136771 | 0.092776239  |
|  | ENSORLG00000001030 | MID1IP1        | MID1 interacting protein 1 [Source:HGNC Symbol:Acc:HGNC:20715]                                                         | 3.686464607 | 1.196786972  | -0.667007392 | 1.823155128  |
|  | ENSORLG00000014533 | lunba          | transcription factor jun-B [Source:NCBI geneAcc:101169770]                                                             | 4.822666742 | 0.832788609  | -1.702848443 | 2.287514948  |
|  | ENSORLG00000009125 | slc5a11        | solute carrier family 5 (sodium/inositol cotransporter), member 11 [Source:ZFIN:Acc.ZDB-GENE-041114-9]                 | 7.19197539  | -8.620952902 | -2.977673091 | 12.83578397  |
|  | ENSORLG00000008562 | kcm2nb         | lysine O <sup>6</sup> -specific demethylase 2b [Source:ZFIN:Acc.ZDB-GENE-080225-13]                                    | 3.528782477 | 0.936165675  | 0.228996619  | 2.820097431  |
|  | ENSORLG00000017239 | ubt3           | ubiquitin protein ligase E3 component n-recogin 3 [Source:ZFIN:Acc.ZDB-GENE-030131-1473]                               | 3.732036611 | 1.86844782   | 0.672144738  | 2.536218959  |
|  | ENSORLG00000016099 | ptrn           | cleistothochin [Source:NCBI geneAcc:101158248]                                                                         | 3.139945877 | 2.55338896   | 1.719064016  | 2.306105941  |
|  | ENSORLG00000007121 | prkd2          | protein kinase D2 [Source:ZFIN:Acc.ZDB-GENE-131120-142]                                                                | 3.279544789 | 1.659266855  | -0.980083878 | 6.640678874  |
|  | ENSORLG00000017041 | HoxB5 (1 of n) | homeobox B5 [Source:HGNC Symbol:Acc:HGNC:5116]                                                                         | 5.17301842  | 1.58571786   | -4.855850005 | -1.268072793 |
|  | ENSORLG00000014078 | kctd7          | potassium channel tetramerization domain containing 7 [Source:ZFIN:Acc.ZDB-GENE-060804-2]                              | 3.057735538 | 1.440134855  | 0.391143955  | 2.009228669  |
|  | ENSORLG00000003372 | -              | -                                                                                                                      | 4.788395627 | -0.028970113 | -2.310594526 | 2.506946027  |
|  | ENSORLG00000000364 | -              | -                                                                                                                      | 4.616264883 | 2.19427659   | -0.02371913  | 2.409553671  |
|  | ENSORLG00000000913 | si:ch73-63a15  | si:ch73-63a15.2 [Source:ZFIN:Acc.ZDB-GENE-091204-463]                                                                  | 3.707686556 | 1.005922387  | -1.329098501 | 1.373150624  |
|  | ENSORLG00000014142 | wasa           | Wiskott-Aldrich syndrome (eczema-thrombocytopenia) a [Source:ZFIN:Acc.ZDB-GENE-081104-419]                             | 4.377873956 | 1.630186374  | -2.798114571 | -0.049949869 |
|  | ENSORLG00000021762 | -              | -                                                                                                                      | 4.092921617 | 0.635831338  | -1.270433385 | 2.187154814  |
|  | ENSORLG00000016555 | rat3db         | RAB3D, member RAS oncogene family, b [Source:ZFIN:Acc.ZDB-GENE-040718-428]                                             | 3.022517784 | -0.534852847 | -2.255807428 | 1.302049211  |
|  | ENSORLG00000018183 | cox4i2         | cytochrome c oxidase subunit 1 isoform 2, mitochondrial [Source:NCBI geneAcc:101172078]                                | 4.460236894 | 1.507034993  | -2.576218063 | 0.374688842  |
|  | ENSORLG00000005530 | -              | -                                                                                                                      | 3.26512627  | 0.954750335  | -1.868650565 | 0.432209866  |
|  | ENSORLG00000017013 | col1           | collagen type I alpha 1 [Source:NCBI geneAcc:10044988]                                                                 | 5.191811628 | 2.204410913  | -3.937964556 | -0.950079044 |
|  | ENSORLG00000010286 | -              | -                                                                                                                      | 4.380129006 | 3.9140523    | 0.051841684  | 0.518400077  |
|  | ENSORLG00000004326 | tyrp1a         | tyrosinase-related protein 1a [Source:ZFIN:Acc.ZDB-GENE-070718-2]                                                      | 4.948163131 | 0.360301499  | -3.143251459 | 1.445094707  |
|  | ENSORLG00000001055 | grg2           | grass carp reovirus (GCRV)-induced gene 2 [Source:ZFIN:Acc.ZDB-GENE-081022-181]                                        | 5.576571063 | 2.902727706  | -0.990174048 | 1.684154521  |
|  | ENSORLG00000011450 | -              | -                                                                                                                      | 7.070895678 | 3.650848005  | -2.199359763 | 1.211171881  |
|  | ENSORLG00000004035 | -              | -                                                                                                                      | 4.851315873 | 0.963981358  | -2.648315414 | 1.239505013  |
|  | ENSORLG00000005297 | ab             | Oryzias latipes hemoglobin embryonic subunit alpha-like (LOC101155030), mRNA. [Source:RefSeq mRNA:Acc:NM_00178988]     | 8.60010769  | 2.966423589  | -3.487102863 | 2.147066804  |
|  | ENSORLG00000015202 | adams15b       | ADAM metalloproteinase with thrombospondin type 1 motif, 15b [Source:ZFIN:Acc.ZDB-GENE-070814-5]                       | 4.657183268 | 1.342556331  | -3.805973502 | -0.490860161 |
|  | ENSORLG0000002623  | CCR7           | C-C motif chemokine receptor 7 [Source:HGNC Symbol:Acc:HGNC:1608]                                                      | 4.103422309 | 1.458820735  | -0.767671224 | 1.877415591  |
|  | ENSORLG00000015068 | slc52a3        | solute carrier family 52 (riboflavin transporter), member 3 [Source:ZFIN:Acc.ZDB-GENE-060421-4460]                     | 5.22591262  | 2.689781551  | -2.84576532  | -0.309154134 |
|  | ENSORLG00000019005 | tyr            | tyrosinase [Source:ZFIN:Acc.ZDB-GENE-991026-3]                                                                         | 4.78214752  | 0.927038729  | -2.208530005 | 1.647064508  |
|  | ENSORLG00000009484 | ofm2b          | noclin 2 [Source:NCBI geneAcc:101169664]                                                                               | 4.347741606 | 1.880430012  | -2.915804169 | -0.448006488 |
|  | ENSORLG00000008349 | slc6a7         | solute carrier family 6 member 7 [Source:ZFIN:Acc.ZDB-GENE-070112-1492]                                                | 3.727141759 | 0.496699539  | -1.192932711 | 2.03799539   |
|  | ENSORLG00000003034 | BMP2           | bone morphogenetic protein receptor type 2 [Source:HGNC Symbol:Acc:HGNC:1078]                                          | 3.329018574 | 0.893255809  | -0.800542163 | 1.635705657  |
|  | ENSORLG00000003985 | brt3           | E3 ubiquitin protein ligase TRIM39 [Source:NCBI geneAcc:101163112]                                                     | 6.433318264 | 2.533719823  | -1.511368683 | 2.288716562  |
|  | ENSORLG00000003855 | ASB13 (1 of n) | ankyrin repeat and SOCS box containing 13 [Source:HGNC Symbol:Acc:HGNC:19765]                                          | 3.905238695 | 1.430539025  | -0.263152293 | 2.212032535  |
|  | ENSORLG00000016739 | zgc-64051      | leukocyte surface antigen CD53 [Source:NCBI geneAcc:101168124]                                                         | 4.014937892 | 2.508325589  | -1.801226039 | -0.294128954 |
|  | ENSORLG00000005254 | -              | -                                                                                                                      | 5.863525904 | 2.91547584   | -2.912596119 | 0.03939381   |
|  | ENSORLG00000016347 | nhsa           | Nance-Horan syndrome (congenital cataracts and dental anomalies) [Source:ZFIN:Acc.ZDB-GENE-090617-1]                   | 4.34742005  | 1.221393366  | -1.67948644  | 1.446847418  |
|  | ENSORLG00000011783 | chp12          | chondroitin polymerizing factor 2 [Source:ZFIN:Acc.ZDB-GENE-030031-7797]                                               | 4.159312355 | 2.5957542    | 0.682931765  | 2.246974311  |
|  | ENSORLG00000002211 | -              | -                                                                                                                      | 3.367163586 | 2.504417565  | 0.396820308  | 1.260050567  |
|  | ENSORLG00000015110 | -              | -                                                                                                                      | 5.219107312 | 0.319377072  | -1.964929496 | 2.932851617  |
|  | ENSORLG00000008574 | irf2           | interferon regulatory factor 2 [Source:ZFIN:Acc.ZDB-GENE-041212-38]                                                    | 5.953391844 | 3.299101386  | -1.523169346 | 1.131606059  |
|  | ENSORLG00000005190 | scamb1         | gabrain [Source:NCBI geneAcc:101159773]                                                                                | 5.432171473 | 0.918620432  | -3.289359335 | 1.22467665   |
|  | ENSORLG00000013182 | inpc1          | inpc1 [Source:ZFIN:Acc.ZDB-GENE-080819-1]                                                                              | 4.946686924 | 1.830741335  | 0.539472456  | 2.774836314  |
|  | ENSORLG00000012288 | MGMAM          | maltese-glycosylase [Source:HGNC Symbol:Acc:HGNC:7043]                                                                 | 4.356416544 | -1.117973417 | -2.746413393 | 2.27687405   |
|  | ENSORLG00000010524 | ana            | anilin a [Source:ZFIN:Acc.ZDB-GENE-030131-8434]                                                                        | 5.058158927 | 2.359258298  | -2.188123436 | 0.501280133  |
|  | ENSORLG00000005329 | kanh2          | KN motif and ankyrin repeat domains 2 [Source:ZFIN:Acc.ZDB-GENE-040724-121]                                            | 4.380230575 | 2.14474586   | -0.84503517  | 1.390933978  |
|  | ENSORLG00000001960 | si:ch211-51c1  | si:ch211-51c1.1 [Source:ZFIN:Acc.ZDB-GENE-120215-48]                                                                   | 4.101973881 | 1.686728385  | -2.051109696 | 0.364620317  |
|  | ENSORLG00000006726 | zgc-114045     | zgc-114045 [Source:ZFIN:Acc.ZDB-GENE-050913-119]                                                                       | 3.387640539 | 0.353390116  | -0.704456852 | 2.33027795   |
|  | ENSORLG00000017188 | -              | -                                                                                                                      | 5.064891545 | 0.675734074  | -5.218295324 | -0.829652375 |
|  | ENSORLG00000010348 | P2RY6          | pyrimidinergic receptor P2Y6 [Source:HGNC Symbol:Acc:HGNC:8543]                                                        | 5.226990277 | 2.234967447  | -0.912907462 | 2.079600014  |
|  | ENSORLG00000014390 | qf1b           | growth factor independent 1B transcription repressor [Source:ZFIN:Acc.ZDB-GENE-091118-129]                             | 5.65303964  | 1.929512023  | -1.683578663 | 2.040395422  |

|                     |                |                                                                                                                |             |              |              |              |
|---------------------|----------------|----------------------------------------------------------------------------------------------------------------|-------------|--------------|--------------|--------------|
| ENSRLOG00000017569  | marks1a        | MARCKS-like 1a [Source:ZFIN,Acc:ZDB-GENE-040426-2146]                                                          | 5.221144992 | 1.743626837  | -2.548259095 | 0.92974414   |
| ENSRLOG00000013837  | -              | -                                                                                                              | 3.32570674  | 1.438577067  | -1.341085603 | 0.546528872  |
| ENSRLOG00000003773  | mrx2b          | motor neuron and pancreas homeobox 2b [Source:ZFIN,Acc:ZDB-GENE-040415-2]                                      | 4.127347964 | 2.476336394  | -2.564782051 | -0.913285013 |
| ENSRLOG00000002067  | SRF1 (1 of m   | serum response factor 1 [Source:HGNC,Symbol,Acc:HGNC:3360]                                                     | 4.545110061 | 1.690516895  | -2.798738233 | -0.015353547 |
| ENSRLOG00000010690  | krf9           | Kruppel-like factor 9 [Source:ZFIN,Acc:ZDB-GENE-060526-244]                                                    | 3.44769538  | 0.787927844  | -1.096888719 | 1.563363999  |
| ENSRLOG00000013637  | lcat2          | lysophosphatidylcholine acyltransferase 2 [Source:ZFIN,Acc:ZDB-GENE-050522-229]                                | 3.663439941 | 2.1368755    | -1.113144035 | 0.413904987  |
| ENSRLOG00000004609  | ltga1          | integrin, alpha 1 [Source:ZFIN,Acc:ZDB-GENE-091118-115]                                                        | 3.068865276 | 2.85201875   | -0.06874989  | 0.148580122  |
| ENSRLOG00000006420  | capng          | capping actin protein, gelsolin like [Source:NCBI gene,Acc:101163360]                                          | 4.53735545  | 1.581819061  | -1.951244586 | 1.004776783  |
| ENSRLOG00000002764  | si:dkeyp-8617  | si:dkeyp-8617 4 [Source:ZFIN,Acc:ZDB-GENE-091204-252]                                                          | 5.382815724 | -0.354390362 | -3.26175131  | 2.441515172  |
| ENSRLOG00000005169  | arhgap32a      | Rho GTPase activating protein 32a [Source:ZFIN,Acc:ZDB-GENE-060503-918]                                        | 5.276669901 | 1.557640371  | -0.983512583 | 2.736004714  |
| ENSRLOG00000003776  | -              | -                                                                                                              | 3.507523778 | 1.78337273   | -2.424259845 | 0.69945473   |
| ENSRLOG00000004197  | ly75           | lymphocyte antigen 75 [Source:ZFIN,Acc:ZDB-GENE-050309-166]                                                    | 4.227797598 | 1.088639554  | -1.156137305 | 1.983505578  |
| ENSRLOG00000007909  | hoxc11a        | homeobox C11a [Source:ZFIN,Acc:ZDB-GENE-990415-111]                                                            | 4.175626452 | -0.533812071 | -2.337976697 | 2.371946131  |
| ENSRLOG00000007955  | hoxf4          | Oryzias latipes homeobox C4 (hoxc4), mRNA [Source:RefSeq, mRNA,Acc:NM_001104878]                               | 3.489530974 | 0.692830756  | -3.024329459 | -0.247144143 |
| ENSRLOG00000000800  | nav2a          | neuron navigator 2b [Source:ZFIN,Acc:ZDB-GENE-120502-31]                                                       | 3.712179714 | 2.176228935  | -1.196557903 | 0.339877093  |
| ENSRLOG00000001756  | NPTX1          | neuronal pentraxin 1 [Source:HGNC Symbol,Acc:HGNC:7852]                                                        | 4.059650955 | 0.767919371  | -2.218599152 | 1.07361644   |
| ENSRLOG00000010018  | rc3h2          | ring finger and CCH-type domains 2 [Source:ZFIN,Acc:ZDB-GENE-060503-694]                                       | 4.983926581 | 2.574780844  | -0.158925371 | 2.250705316  |
| ENSRLOG00000002535  | rtc36          | tetratricopeptide repeat domain 36 [Source:NCBI gene,Acc:101170288]                                            | 5.872261003 | 1.549397876  | -2.510972542 | 1.812375226  |
| ENSRLOG000000016818 | RBMS1 (1 of m  | RNA binding motif single stranded interacting protein 1 [Source:HGNC Symbol,Acc:HGNC:9907]                     | 3.473553069 | 1.285082856  | -0.434618048 | 1.754337775  |
| ENSRLOG00000002901  | -              | -                                                                                                              | 3.851166948 | 1.891135822  | -1.208175021 | 0.752339977  |
| ENSRLOG00000009620  | fscn1b         | fascin actin-bundling protein 1b [Source:ZFIN,Acc:ZDB-GENE-120507-1]                                           | 3.608753994 | 0.671569769  | -0.857435615 | 2.080234567  |
| ENSRLOG00000012415  | -              | -                                                                                                              | 3.918028874 | 1.918205282  | 0.348538802  | 2.348846535  |
| ENSRLOG00000003020  | gb             | Oryzias latipes hemoglobin subunit beta-1-like (gb), mRNA [Source:RefSeq, mRNA,Acc:NM_001278824]               | 6.325032807 | 0.111864033  | -3.950626181 | 2.263027464  |
| ENSRLOG000000010775 | tzd4           | triazolide class receptor 4 [Source:ZFIN,Acc:ZDB-GENE-990415-217]                                              | 4.503750283 | 1.735400971  | -0.392031769 | 2.376802288  |
| ENSRLOG00000007672  | -              | -                                                                                                              | 5.652550364 | 1.13076724   | -3.844471724 | 0.677801249  |
| ENSRLOG00000000406  | -              | -                                                                                                              | 4.897475662 | 0.95757658   | -1.830037982 | 2.110786573  |
| ENSRLOG00000001370  | -              | -                                                                                                              | 4.730807191 | 2.805463476  | 2.234236064  | 2.1609046    |
| ENSRLOG000000011418 | rtcd5          | rtl-dependent gene 5 [Source:ZFIN,Acc:ZDB-GENE-031030-7]                                                       | 4.866703477 | 2.644188915  | -1.572937441 | 0.65006267   |
| ENSRLOG00000017257  | -              | -                                                                                                              | 3.526729007 | 1.261425401  | -2.50321202  | -0.237423434 |
| ENSRLOG000000010567 | si:dkey-51483  | si:dkey-51483 3 [Source:ZFIN,Acc:ZDB-GENE-081103-8]                                                            | 4.711009094 | 3.172951799  | -1.27862408  | 0.261921744  |
| ENSRLOG00000007061  | -              | -                                                                                                              | 3.747574187 | 2.420332893  | -0.503899979 | 0.823861222  |
| ENSRLOG000000003007 | rlp19 (1 of m  | 60S ribosomal protein L19 [Source:NCBI gene,Acc:101374455]                                                     | 3.538074785 | 0.84055303   | -1.560776783 | 1.137229914  |
| ENSRLOG000000017926 | bach2b         | BTB and CNC homology 1, basic leucine zipper transcription factor 2b [Source:ZFIN,Acc:ZDB-GENE-041001-139]     | 3.414447005 | 1.711111105  | -2.409319453 | -0.705498657 |
| ENSRLOG00000007937  | PHLPP2         | PH domain and leucine rich repeat protein phosphatase 2 [Source:HGNC Symbol,Acc:HGNC:29149]                    | 3.266513279 | 1.519615991  | -1.076818546 | 0.670563157  |
| ENSRLOG000000018111 | TMEM67A        | transmembrane protein 67A [Source:HGNC Symbol,Acc:HGNC:24529]                                                  | 3.48284629  | 1.190127567  | -0.224082736 | 2.069119674  |
| ENSRLOG00000009268  | srfs5a         | serine and arginine rich splicing factor 5 [Source:NCBI gene,Acc:101161448]                                    | 3.111426532 | 1.06852828   | 0.02670949   | 2.070091525  |
| ENSRLOG000000015567 | pou6f1         | POU class 6 homeobox 1 [Source:ZFIN,Acc:ZDB-GENE-980526-530]                                                   | 3.65218243  | 1.084466566  | -0.331288817 | 2.236912968  |
| ENSRLOG000000004402 | tp73           | tumor protein p73 [Source:ZFIN,Acc:ZDB-GENE-030814-21]                                                         | 5.989561703 | 1.264491093  | -0.836063068 | 3.889489754  |
| ENSRLOG000000015899 | -              | -                                                                                                              | 4.021738524 | -2.534924635 | -4.075985738 | 2.481161094  |
| ENSRLOG00000007133  | -              | -                                                                                                              | 3.473505407 | -13.15645603 | -3.75708673  | 13.37338313  |
| ENSRLOG000000015651 | csmp2          | cysteine-serine-rich nuclear protein 2 [Source:ZFIN,Acc:ZDB-GENE-080312-137]                                   | 4.988530669 | 1.915446036  | -1.280503476 | 1.788519955  |
| ENSRLOG00000009359  | -              | -                                                                                                              | 5.452802157 | 1.835285893  | -2.925818897 | 0.692186157  |
| ENSRLOG000000013268 | tnfrsf10       | TNF superfamily member 10 [Source:ZFIN,Acc:ZDB-GENE-040718-335]                                                | 3.653705256 | 1.966816015  | -1.727609138 | -0.040234882 |
| ENSRLOG000000013104 | -              | -                                                                                                              | 3.466392934 | 2.053811646  | -0.420269185 | 0.992791778  |
| ENSRLOG000000004325 | -              | -                                                                                                              | 6.514295037 | -9.677807716 | -1.477093276 | 14.71551859  |
| ENSRLOG000000003505 | -              | -                                                                                                              | 3.466292486 | 0.047981914  | -0.577486723 | 2.841310102  |
| ENSRLOG000000017886 | collec12       | collectin sub-family member 12 [Source:ZFIN,Acc:ZDB-GENE-030131-9807]                                          | 3.37724709  | 2.641289566  | -2.22362672  | -1.487184235 |
| ENSRLOG000000010321 | p2ry10         | P2Y receptor family member 10 [Source:ZFIN,Acc:ZDB-GENE-070410-105]                                            | 5.578096721 | 2.16178254   | -2.282049896 | 1.134746081  |
| ENSRLOG000000000559 | TNNI2 (1 of m  | tropomyosin I2, fast skeletal type [Source:HGNC Symbol,Acc:HGNC:11946]                                         | 4.747495654 | 0.447224035  | -5.661149924 | -1.360393999 |
| ENSRLOG000000007523 | c2cd2l         | c2cd2-like [Source:ZFIN,Acc:ZDB-GENE-041019-1]                                                                 | 3.565882031 | 0.658033076  | -1.421756135 | 1.486576816  |
| ENSRLOG000000013130 | apodb (1 of m  | apolipoprotein Db [Source:ZFIN,Acc:ZDB-GENE-051023-8]                                                          | 5.894784224 | 1.186424068  | -2.930150917 | 1.778693986  |
| ENSRLOG000000015267 | btg1           | BTG anti-proliferation factor 1 [Source:NCBI gene,Acc:101168651]                                               | 4.238858086 | 1.17318338   | -2.845879887 | 0.220279555  |
| ENSRLOG000000015915 | si:dkey-21a6.5 | si:dkey-21a6.5 [Source:ZFIN,Acc:ZDB-GENE-131121-257]                                                           | 5.569968154 | 2.898939015  | -0.095752158 | 2.575759446  |
| ENSRLOG000000008560 | pdia2          | protein disulfide isomerase family A, member 2 [Source:ZFIN,Acc:ZDB-GENE-040426-705]                           | 4.118794783 | 1.09445304   | -2.944983826 | 0.07942925   |
| ENSRLOG00000007509  | arab5b         | CAMP response element binding protein 5b [Source:ZFIN,Acc:ZDB-GENE-091020-6]                                   | 4.012277468 | 1.644515306  | -1.72688827  | 0.642160029  |
| ENSRLOG000000006785 | dk2            | dkk2ip1 WNT signaling pathway inhibitor 2 [Source:ZFIN,Acc:ZDB-GENE-080204-14]                                 | 3.538619311 | 1.377242526  | 0.169635744  | 2.331496707  |
| ENSRLOG000000016748 | lamb1b         | laminin subunit beta-1 [Source:NCBI gene,Acc:101165882]                                                        | 3.251010421 | 2.244165231  | -1.755276151 | -0.747946053 |
| ENSRLOG000000012030 | styk1b         | serine/threonine-tyrosine kinase 1b [Source:ZFIN,Acc:ZDB-GENE-030131-3435]                                     | 6.928265438 | 1.950736745  | -4.948255882 | 0.029742548  |
| ENSRLOG000000002526 | fermt3b        | fermitin family member 3b [Source:ZFIN,Acc:ZDB-GENE-040426-1366]                                               | 3.42187949  | 1.498378337  | -1.714488688 | 0.209497437  |
| ENSRLOG000000000435 | -              | -                                                                                                              | 16.73441485 | 0            | -3.965904847 | 12.76900099  |
| ENSRLOG000000003968 | sp4            | Sp4 transcription factor [Source:HGNC Symbol,Acc:HGNC:11209]                                                   | 3.776018071 | 1.10309995   | -0.159823817 | 2.513578384  |
| ENSRLOG000000012155 | rxra           | retinoid X receptor, alpha 1 [Source:ZFIN,Acc:ZDB-GENE-070314-2]                                               | 4.116069249 | 1.647112352  | -1.336782722 | 1.132658279  |
| ENSRLOG000000002465 | kkkb           | inhibitor of kappa light polypeptide gene enhancer in B-cells, kinase beta [Source:ZFIN,Acc:ZDB-GENE-071115-2] | 3.593572904 | 1.480995407  | -1.089626304 | 1.023436162  |
| ENSRLOG000000002049 | si:dkeyp-8748  | si:dkeyp-8748 8 [Source:ZFIN,Acc:ZDB-GENE-041111-161]                                                          | 4.404974517 | 0.726107579  | -0.9222901   | 2.75706936   |
| ENSRLOG000000017372 | dk2a           | distal-less homeobox 2a [Source:ZFIN,Acc:ZDB-GENE-980526-212]                                                  | 3.72459942  | -1.063110168 | -2.781439645 | 2.006613802  |

|                     |                  |                                                                                                                   |             |              |              |              |
|---------------------|------------------|-------------------------------------------------------------------------------------------------------------------|-------------|--------------|--------------|--------------|
| ENSRGLG00000016573  | myb              | Oryzias latipes MYB proto-oncogene, transcription factor (myb), mRNA [Source:RefSeq; mRNAAccession:001104689]     | 3.016783936 | 0.417091136  | -0.554459637 | 2.045717732  |
| ENSRGLG00000018188  | -                | -                                                                                                                 | 5.532851228 | 0.746231352  | -2.799147881 | 1.987956944  |
| ENSRGLG00000001272  | tgfbl1a          | transforming growth factor, beta 1a [Source:ZFIN;Acc:ZDB-GENE-030618_1]                                           | 4.401201635 | 2.155845366  | 0.044052438  | 2.289894035  |
| ENSRGLG00000002467  | daps             | dihydropyrimidinase [Source:ZFIN;Acc:ZDB-GENE-070508_1]                                                           | 4.252299661 | -0.339048899 | -4.110797463 | 0.481037663  |
| ENSRGLG00000000328  | stc1l            | stromal cell 1, like [Source:ZFIN;Acc:ZDB-GENE-040426_1821]                                                       | 10.30396611 | -1.794215768 | -8.304149548 | 3.794538042  |
| ENSRGLG00000013632  | -                | -                                                                                                                 | 4.910154168 | 0.161680274  | -3.356083328 | 1.392878477  |
| ENSRGLG00000016898  | slip             | selectin P [Source:ZFIN;Acc:ZDB-GENE-110107_21]                                                                   | 4.559320754 | 2.962195084  | -2.642273754 | 1.04466368   |
| ENSRGLG00000007200  | pev5fb           | peroxisomal biogenesis factor 5-like B1 [Source:ZFIN;Acc:ZDB-GENE-111221_1]                                       | 3.554321301 | 0.852933964  | -0.560358848 | 2.141510947  |
| ENSRGLG00000000070  | large2           | LARGE xylosyl- and glucuronyltransferase 2 [Source:ZFIN;Acc:ZDB-GENE-050419_253]                                  | 4.11068377  | 1.507085735  | -0.296074346 | 0.50739418   |
| ENSRGLG00000008277  | ptfla            | pancreas associated transcription factor 1a [Source:NCBI gene;Acc:101160350]                                      | 16.71999249 | 9.594380594  | -4.93275808  | 2.193323771  |
| ENSRGLG00000013548  | Flu1             | Flu-1 proto-oncogene, ETS transcription factor [Source:HGNC Symbol;Acc:HGNC:3749]                                 | 4.437979421 | 2.140620312  | -1.940293546 | 0.357549324  |
| ENSRGLG00000004854  | -                | -                                                                                                                 | 3.912413923 | 0.752867684  | -1.434307819 | 1.726724354  |
| ENSRGLG00000007299  | -                | -                                                                                                                 | 3.027864871 | -0.136526954 | -2.853492881 | 0.281384372  |
| ENSRGLG00000001724  | EXT1 (1 of many) | extosian glycosyltransferase 1 [Source:HGNC Symbol;Acc:HGNC:3512]                                                 | 3.238404085 | 0.48185021   | -2.314352531 | 0.442806452  |
| ENSRGLG00000017303  | zpc15405b        | zpc15405b [Source:ZFIN;Acc:ZDB-GENE-06029-612]                                                                    | 5.750758892 | 1.71371053   | -1.488430787 | 1.549029961  |
| ENSRGLG00000009476  | foxp1            | forkhead box P1 [Source:NCBI gene;Acc:1011711663]                                                                 | 3.613535146 | 1.570819133  | -3.848970464 | 0.159089553  |
| ENSRGLG00000005775  | TGFB11           | transforming growth factor beta 1 induced transcript 1 [Source:HGNC Symbol;Acc:HGNC:11767]                        | 4.057482752 | 1.931854571  | -1.73843932  | 0.387679137  |
| ENSRGLG00000017030  | -                | -                                                                                                                 | 3.869692323 | 2.258468547  | 0.230844625  | 1.842553337  |
| ENSRGLG00000001186  | hspb8            | heat shock protein family B (small) member 8 [Source:NCBI gene;Acc:101166228]                                     | 3.222328152 | 1.143760314  | -1.759854177 | 0.320152365  |
| ENSRGLG00000011146  | h3s3b1b          | hesian sulfate (glucosamine) 3-O-sulfotransferase 3B1b [Source:ZFIN;Acc:ZDB-GENE-070202_5]                        | 4.066432141 | 2.503169873  | -0.909051725 | 0.654696241  |
| ENSRGLG00000008984  | -                | -                                                                                                                 | 4.742367274 | 0.877383688  | -2.289940348 | 1.575529426  |
| ENSRGLG00000012559  | prapa            | GRB2 related adaptor protein A [Source:ZFIN;Acc:ZDB-GENE-050522_347]                                              | 6.154149779 | 3.831144315  | -1.348175466 | 0.97307715   |
| ENSRGLG00000008497  | -                | -                                                                                                                 | 4.25354386  | 1.027875549  | -2.860263784 | 0.365899406  |
| ENSRGLG00000004233  | Tgf18a           | fibroblast growth factor 18a [Source:ZFIN;Acc:ZDB-GENE-030714_1]                                                  | 3.926417052 | 1.578885999  | -0.653001103 | 1.695013218  |
| ENSRGLG00000005185  | -                | -                                                                                                                 | 4.673662063 | 2.041068939  | 0.125776174  | 2.758853423  |
| ENSRGLG00000015849  | foxp4            | forkhead box P4 [Source:ZFIN;Acc:ZDB-GENE-101207_1]                                                               | 4.71015307  | 1.508413099  | -2.979687834 | 0.222535827  |
| ENSRGLG00000017116  | foxb             | Fox b [Source:NCBI gene;Acc:100048473]                                                                            | 4.192051131 | -0.107611738 | -1.839111734 | 1.639111734  |
| ENSRGLG00000014598  | -                | -                                                                                                                 | 3.120109614 | 2.477046724  | 0.116102977  | 0.759658854  |
| ENSRGLG00000001976  | FLIP1L           | flavin A interacting protein 1 like [Source:HGNC Symbol;Acc:HGNC:24589]                                           | 3.279896615 | 0.923541818  | -1.7964714   | 0.56042179   |
| ENSRGLG00000015696  | atp1b1a          | sodium/potassium-transporting ATPase subunit beta-233 [Source:NCBI gene;Acc:101164836]                            | 3.399369992 | 2.054933594  | 1.151030607  | 2.49594913   |
| ENSRGLG00000018010  | col4a1           | collagen, type IV, alpha 1 [Source:ZFIN;Acc:ZDB-GENE-081105_114]                                                  | 4.73090968  | 2.538103336  | -0.191907418 | 1.174213179  |
| ENSRGLG000000016936 | dusp3b           | dual specificity phosphatase 3b [Source:ZFIN;Acc:ZDB-GENE-030616_38]                                              | 4.167039994 | 1.884761264  | -1.822685345 | 0.460076337  |
| ENSRGLG00000017550  | zfp9b            | zinc finger, NFX1-type containing 1 [Source:ZFIN;Acc:ZDB-GENE-091111_3]                                           | 3.065257824 | 0.854134422  | 0.168110734  | 2.379718411  |
| ENSRGLG00000006096  | znfx1            | zinc finger, NFX1-type containing 1 [Source:ZFIN;Acc:ZDB-GENE-110804_2]                                           | 3.574738602 | 1.320504306  | -0.50857348  | 1.746145848  |
| ENSRGLG00000013955  | mra9b            | matrix-remodelling associated 9b [Source:ZFIN;Acc:ZDB-GENE-061013_368]                                            | 3.098212545 | 1.760771921  | -0.563581025 | 0.77434358   |
| ENSRGLG00000017624  | sqp1a.1          | squapin 1 (Cotton blood group) [Source:NCBI gene;Acc:101155722]                                                   | 5.594957124 | 0.857275919  | -4.957453698 | -0.219287624 |
| ENSRGLG00000005043  | hoxa13a          | homeobox protein Hox-A13a [Source:NCBI gene;Acc:101162380]                                                        | 5.320202892 | -0.041157662 | -2.702622702 | 2.659223152  |
| ENSRGLG00000016599  | agap2            | ARFAP with G1-Pase domain, ankyrin repeat and PH domain 2 [Source:ZFIN;Acc:ZDB-GENE-061103_343]                   | 5.382384574 | 2.320438994  | -2.11250124  | 0.950326166  |
| ENSRGLG00000016757  | lxn              | leucamin [Source:ZFIN;Acc:ZDB-GENE-081105_159]                                                                    | 4.551561274 | 1.78758922   | -2.05082846  | 0.713648092  |
| ENSRGLG00000009099  | zap70            | zeta chain of T cell receptor associated protein kinase 70 [Source:ZFIN;Acc:ZDB-GENE-050522_257]                  | 4.510614142 | 1.660394266  | -1.314531672 | 1.53617357   |
| ENSRGLG00000014709  | megf10           | multiple EF-like domains 10 [Source:ZFIN;Acc:ZDB-GENE-080506_1]                                                   | 4.577992248 | 2.043382963  | -1.719311885 | 0.815786415  |
| ENSRGLG00000003233  | hsd11b2          | hydroxysteroid (11-beta) dehydrogenase 2 [Source:ZFIN;Acc:ZDB-GENE-030131_6030]                                   | 3.628092728 | 2.239966358  | -2.841183106 | 1.452572035  |
| ENSRGLG00000004247  | flnca            | flamin C [Source:NCBI gene;Acc:101165476]                                                                         | 4.603988898 | 1.818308339  | -2.633275739 | 1.514891543  |
| ENSRGLG00000002516  | -                | -                                                                                                                 | 4.612424605 | 1.57614038   | -1.573001476 | 1.463767778  |
| ENSRGLG00000002650  | -                | -                                                                                                                 | 3.147689025 | 1.969546094  | 0.416603816  | 1.592318003  |
| ENSRGLG00000012975  | -                | -                                                                                                                 | 3.815397463 | 2.229650386  | -0.63590108  | 0.951140252  |
| ENSRGLG00000000480  | STK32C           | serine/threonine kinase 32C [Source:HGNC Symbol;Acc:HGNC:21332]                                                   | 3.679081199 | 1.114716732  | -2.981076138 | -0.416224751 |
| ENSRGLG00000009545  | mena             | mosasin A [Source:ZFIN;Acc:ZDB-GENE-071211_2]                                                                     | 3.203843184 | 1.252107546  | 0.05289288   | 2.007509921  |
| ENSRGLG00000013669  | zbtb8b           | zinc finger and BTB domain containing 8b [Source:ZFIN;Acc:ZDB-GENE-050417_42]                                     | 3.754973348 | 1.635034449  | -0.543626558 | 1.576797015  |
| ENSRGLG00000008590  | hsd3b1           | hydroxy-delta-5-steroid dehydrogenase, 3 beta- and steroid delta-isomerase 1 [Source:ZFIN;Acc:ZDB-GENE-081105_30] | 5.516117956 | 2.677749991  | -0.946999041 | 1.89185381   |
| ENSRGLG00000012886  | -                | -                                                                                                                 | 16.73753084 | 14.12732858  | -0.371711448 | 2.238958348  |
| ENSRGLG00000004672  | thsd1            | thrombospondin, type 1, domain containing 1 [Source:ZFIN;Acc:ZDB-GENE-100105_3]                                   | 4.330343253 | 2.015521765  | -0.259781132 | 2.055525618  |
| ENSRGLG00000008388  | agtr2            | angiotensin II receptor, type 2 [Source:ZFIN;Acc:ZDB-GENE-030306_36]                                              | 3.598308297 | 1.736192643  | -2.216066775 | -0.353466237 |
| ENSRGLG00000016394  | -                | -                                                                                                                 | 3.471120966 | 1.388750677  | -2.420811878 | -0.337956058 |
| ENSRGLG00000019378  | -                | -                                                                                                                 | 3.426024202 | 2.262081295  | -1.822588647 | -0.658138531 |
| ENSRGLG00000010706  | desmb            | desmin b [Source:ZFIN;Acc:ZDB-GENE-061027_102]                                                                    | 4.774261151 | -0.326171438 | -5.438742669 | -0.353461059 |
| ENSRGLG00000003261  | lam20b           | family with sequence similarity 20, member Cb [Source:ZFIN;Acc:ZDB-GENE-050301_4]                                 | 3.890983663 | 2.310470967  | -0.694529302 | 0.876467408  |
| ENSRGLG00000010908  | timp2a           | TIMP metalloproteinase inhibitor 2a [Source:ZFIN;Acc:ZDB-GENE-030612_1]                                           | 4.32677345  | 2.310039707  | -0.900331571 | 1.116886993  |
| ENSRGLG00000006160  | -                | -                                                                                                                 | 6.92092173  | 3.209602086  | -2.629224745 | 1.08260784   |
| ENSRGLG00000017372  | -                | -                                                                                                                 | 4.530208193 | -0.74743906  | -3.086038634 | 2.23304164   |
| ENSRGLG00000007399  | dapk2b           | death-associated protein kinase 2b [Source:ZFIN;Acc:ZDB-GENE-060810_178]                                          | 3.129862537 | 1.180639588  | 0.162017421  | 2.131782254  |
| ENSRGLG00000017758  | odc1             | ornithine decarboxylase 1 [Source:ZFIN;Acc:ZDB-GENE-010816_1]                                                     | 3.753984305 | 1.783351625  | -0.514750792 | 1.456367035  |
| ENSRGLG00000004727  | gnomb            | glycoprotein (transmembrane) nmb [Source:ZFIN;Acc:ZDB-GENE-060503_106]                                            | 5.631878893 | 2.323452267  | -3.396583125 | -0.087671422 |
| ENSRGLG00000012269  | -                | -                                                                                                                 | 5.162463141 | 1.125813891  | -1.62334685  | 2.413786283  |
| ENSRGLG00000009499  | ngfa             | nerve growth factor (beta polypeptide) [Source:ZFIN;Acc:ZDB-GENE-990415_176]                                      | 3.649486901 | 2.025131314  | 1.161737843  | 2.786577234  |
| ENSRGLG00000000027  | -                | -                                                                                                                 | 3.715128452 | 0.917084209  | -1.208568193 | 1.589980572  |
| ENSRGLG00000009533  | ltnm             | leucamin [Source:NCBI gene;Acc:101163371]                                                                         | 4.701500574 | 0.253352104  | -4.767591789 | -0.31895838  |
| ENSRGLG00000017972  | -                | -                                                                                                                 | 5.546695694 | 2.640471351  | -1.422733095 | 1.483916024  |
| ENSRGLG00000001041  | mf141            | ring finger protein 141 [Source:NCBI gene;Acc:101159666]                                                          | 4.032127728 | 1.079010437  | -1.026428818 | 1.92717304   |
| ENSRGLG00000005588  | tmem47           | transmembrane protein 47 [Source:NCBI gene;Acc:101155915]                                                         | 15.98861533 | 12.6445706   | -1.105694677 | 2.248817078  |
| ENSRGLG00000013710  | hpr2             | natriuretic peptide receptor 2 [Source:ZFIN;Acc:ZDB-GENE-141030_2]                                                | 3.855096816 | 0.964374158  | -1.662540483 | 1.228668204  |
| ENSRGLG00000001264  | slc4a2b          | solute carrier family 4 (anion exchanger), member 2b [Source:ZFIN;Acc:ZDB-GENE-030429_14]                         | 3.13295304  | -0.407657213 | -2.048820652 | 1.49227444   |

|                     |                  |                                                                                                                                                       |             |              |               |              |
|---------------------|------------------|-------------------------------------------------------------------------------------------------------------------------------------------------------|-------------|--------------|---------------|--------------|
| ENSORLG0000001909   | irtv4            | ets variant 4 [Source:ZFIN;Acc:ZDB-GENE-990415-71]                                                                                                    | 4.53679238  | 1.990208458  | -1.277834432  | 1.269232633  |
| ENSORLG0000002530   | -                | -                                                                                                                                                     | 7.282110288 | 4.802364434  | -0.648039335  | 1.832187942  |
| ENSORLG0000002030   | cthrca1a         | collagen triple helix repeat containing 1 [Source:NCBI gene:Acc:101160936]                                                                            | 5.183044226 | 2.767602375  | -0.570097989  | 2.986024622  |
| ENSORLG00000006049  | sh3px2ab         | SH3 and PX domains 2Ab [Source:ZFIN;Acc:ZDB-GENE-101220-1]                                                                                            | 3.63993184  | 1.328598568  | -0.879280468  | 1.432544978  |
| ENSORLG00000006696  | plekha7b         | pleckstrin homology domain containing, family A member 7b [Source:ZFIN;Acc:ZDB-GENE-091014-2]                                                         | 3.655723349 | 2.125395017  | -0.587386249  | 2.118209904  |
| ENSORLG00000009933  | anp2             | agnasec 2 [Source:ZFIN;Acc:ZDB-GENE-030131-1334]                                                                                                      | 4.781815136 | 0.5468970263 | -3.745531486  | 0.491798302  |
| ENSORLG0000002236   | lec3b3b          | C-type lectin domain family 3 member B [Source:NCBI gene:Acc:101160080]                                                                               | 17.84364869 | 13.44385655  | -2.835738516  | 1.564522066  |
| ENSORLG00000004311  | ERP27            | endoplasmic reticulum protein 27 [Source:NCBI gene:Acc:101158668]                                                                                     | 3.904700268 | 2.611559877  | -1.604139093  | -0.310513498 |
| ENSORLG00000009207  | -                | -                                                                                                                                                     | 5.65946832  | -10.0266341  | -2.864081023  | 12.8200054   |
| ENSORLG00000015142  | -                | -                                                                                                                                                     | 4.4647668   | 1.50949223   | -1.299820413  | 1.664488616  |
| ENSORLG00000005072  | -                | -                                                                                                                                                     | 3.41980736  | -1.757807169 | -1.057984738  | 4.111117445  |
| ENSORLG00000010885  | tmipa            | thioredoxin interacting protein [Source:NCBI gene:Acc:101174114]                                                                                      | 4.330049872 | 1.480784111  | -1.863976055  | 0.985774618  |
| ENSORLG00000015176  | ctsk             | cathepsin K [Source:NCBI gene:Acc:101164923]                                                                                                          | 5.598085148 | 2.738493818  | -1.977327273  | 0.874909844  |
| ENSORLG00000010119  | -                | -                                                                                                                                                     | 4.395846905 | 2.901688642  | -1.851951899  | -0.357308331 |
| ENSORLG00000006177  | slc21l1-153b     | ES1 protein homolog, mitochondrial-like [Source:NCBI gene:Acc:101169045]                                                                              | 4.855059844 | 1.665542018  | -0.2031683201 | 1.158319457  |
| ENSORLG00000000346  | -                | -                                                                                                                                                     | 3.336029156 | 0.736029496  | -1.635828723  | 0.964658877  |
| ENSORLG00000008930  | ctnbp2nb         | CTNBP2 N-terminal like 1 [Source:ZFIN;Acc:ZDB-GENE-040724-65]                                                                                         | 4.099328101 | 0.35086238   | -1.394874224  | 2.354077339  |
| ENSORLG00000004307  | -                | -                                                                                                                                                     | 5.853194415 | 1.002907168  | -3.048037039  | 1.804734758  |
| ENSORLG00000004707  | alas2            | 5-aminolevulinic synthase, erythroid-specific, mitochondrial [Source:NCBI gene:Acc:100049501]                                                         | 6.295577672 | 0.671191826  | -4.352806609  | 1.272064175  |
| ENSORLG00000004279  | rtfox2           | RNA binding fox-1 homolog 2 [Source:ZFIN;Acc:ZDB-GENE-040276-2464]                                                                                    | 5.536580002 | 2.506821541  | -0.238100326  | 2.791969882  |
| ENSORLG00000015302  | sema4c           | sema domain, immunoglobulin domain (Ig), transmembrane domain (TM) and short cytoplasmic domain, (semaphorin) 4C [Source:ZFIN;Acc:ZDB-GENE-080303-16] | 3.324405844 | 1.392599383  | -2.208055317  | -0.275763628 |
| ENSORLG00000004188  | lacc1            | laccase (multicopper oxidoreductase) domain containing 1 [Source:ZFIN;Acc:ZDB-GENE-081104-155]                                                        | 4.629728977 | 1.640426123  | -2.077525266  | 0.912034969  |
| ENSORLG00000001598  | -                | -                                                                                                                                                     | 3.788391009 | 0.789733778  | -1.972060422  | 1.027091513  |
| ENSORLG00000015518  | zgc:162297       | uncharacterized protein F13E9.13, mitochondrial [Source:NCBI gene:Acc:101155838]                                                                      | 3.277528461 | 1.937208857  | -0.516770564  | 0.824033868  |
| ENSORLG00000000678  | tnnt3a           | troponin T, fast skeletal muscle isoforms [Source:NCBI gene:Acc:101151727]                                                                            | 6.587475683 | 1.499037608  | -6.11879836   | -1.0298783   |
| ENSORLG00000017721  | esr2             | estrogen receptor beta [Source:NCBI gene:Acc:100049289]                                                                                               | 3.249629361 | 0.887182671  | -1.958069907  | 0.404865755  |
| ENSORLG00000010760  | -                | -                                                                                                                                                     | 5.49645753  | -1.057892327 | -3.857791551  | 2.697048771  |
| ENSORLG00000017403  | PRKD3            | protein kinase D3 [Source:HGNC Symbol;Acc:HGNC:24164]                                                                                                 | 3.019424483 | 1.736352051  | 1.10445451    | 2.388016114  |
| ENSORLG00000016487  | nrf3-6           | nuclear factor, interleukin 3 regulated, member 6 [Source:ZFIN;Acc:ZDB-GENE-040704-63]                                                                | 4.270910029 | 0.955487261  | -2.063766704  | 1.252140796  |
| ENSORLG00000004570  | cldn1            | claudin-7 [Source:NCBI gene:Acc:101156528]                                                                                                            | 4.549519858 | -11.08616277 | -1.663940765  | 13.97225287  |
| ENSORLG00000000963  | -                | -                                                                                                                                                     | 3.106316305 | -0.379670561 | -1.672933038  | 1.813648611  |
| ENSORLG00000014038  | rap1gap2a        | RAP1 GTPase activating protein 2a [Source:ZFIN;Acc:ZDB-GENE-061013-179]                                                                               | 5.690471399 | 1.383167209  | -1.71945209   | 2.58944848   |
| ENSORLG00000015570  | plcg2            | phospholipase C, gamma 2 [Source:ZFIN;Acc:ZDB-GENE-030131-9832]                                                                                       | 5.046474411 | 1.845473657  | -2.037113667  | 1.164373075  |
| ENSORLG00000008093  | TIPP             | tubulin polymerization promoting protein [Source:HGNC Symbol;Acc:HGNC:24164]                                                                          | 5.183621658 | 2.003949204  | -0.924110241  | 2.256046111  |
| ENSORLG00000010460  | dna2             | DNA replication helicase/nuclease 2 [Source:ZFIN;Acc:ZDB-GENE-090313-71]                                                                              | 4.376331791 | 0.05102483   | -1.828518395  | 2.497273555  |
| ENSORLG00000000444  | -                | -                                                                                                                                                     | 4.339281164 | 0.763721084  | -1.003634409  | 2.572410957  |
| ENSORLG00000016612  | per2             | period circadian clock 2 [Source:ZFIN;Acc:ZDB-GENE-011220-2]                                                                                          | 5.313854703 | 2.487195932  | -1.761191093  | 1.065950775  |
| ENSORLG00000017252  | sg5a             | Sp5 transcription factor a [Source:ZFIN;Acc:ZDB-GENE-030430-2]                                                                                        | 3.854622414 | 1.223630565  | -0.623726426  | 2.007751114  |
| ENSORLG00000018128  | acsm4            | aminocarbonylmucronate semialdehyde decarboxylase [Source:NCBI gene:Acc:101167833]                                                                    | 3.483897382 | -0.175893088 | -2.521470127  | 1.138807562  |
| ENSORLG00000005328  | -                | -                                                                                                                                                     | 4.076466801 | 1.451352472  | -0.92088892   | 1.704710328  |
| ENSORLG00000017498  | fam167b          | family with sequence similarity 167, member B [Source:ZFIN;Acc:ZDB-GENE-131121-390]                                                                   | 5.98629336  | 0.48115029   | -1.94544969   | 3.560177816  |
| ENSORLG00000003039  | lgalsla          | lectin, galactoside-binding-like a [Source:ZFIN;Acc:ZDB-GENE-060616-24]                                                                               | 3.265092155 | 2.108715631  | 1.172851719   | 2.329715141  |
| ENSORLG00000012839  | -                | -                                                                                                                                                     | 3.843282112 | 1.399190329  | -0.929638802  | 1.51493975   |
| ENSORLG00000004738  | -                | -                                                                                                                                                     | 6.929178457 | 4.027633263  | -1.782529296  | 1.119484043  |
| ENSORLG00000014423  | MAP3K20 (1 of 2) | mitogen-activated protein kinase kinase kinase 20 [Source:HGNC Symbol;Acc:HGNC:17397]                                                                 | 3.141210197 | 2.131800343  | -1.637192755  | -0.627297961 |
| ENSORLG00000016496  | ralgapan1        | ral guanine nucleotide dissociation stimulator like 1 [Source:NCBI gene:Acc:101173538]                                                                | 3.894534186 | 2.324720839  | -1.765266455  | -0.204968328 |
| ENSORLG00000007896  | hoxc13a          | homeobox C13 [Source:NCBI gene:Acc:101172814]                                                                                                         | 4.959853286 | -1.051186244 | -3.418377007  | 2.592947329  |
| ENSORLG00000015850  | RAP2B (1 of 2)   | ras-related protein Rap-2b [Source:NCBI gene:Acc:101168899]                                                                                           | 4.489416932 | 1.837983755  | 0.324805266   | 2.972731155  |
| ENSORLG00000014616  | -                | -                                                                                                                                                     | 4.360138781 | 1.2159544    | -1.873284501  | 1.27142199   |
| ENSORLG00000012266  | p51              | elastin-1 [Source:NCBI gene:Acc:101168586]                                                                                                            | 4.707790283 | 0.194624432  | -3.452881586  | 1.050769847  |
| ENSORLG00000015080  | adcy9            | adenylate cyclase 9 [Source:ZFIN;Acc:ZDB-GENE-050208-456]                                                                                             | 4.310015684 | 1.738868634  | -2.013310152  | 0.558321218  |
| ENSORLG00000010424  | ADAMTSL4         | ADAMTSL4 [Source:HGNC Symbol;Acc:HGNC:19706]                                                                                                          | 4.009854285 | 2.28284395   | -2.632537275  | -0.895241821 |
| ENSORLG00000015547  | slc21l1-210c     | uncharacterized LOC101156655 [Source:NCBI gene:Acc:101156655]                                                                                         | 3.454784658 | 0.333035528  | -1.505278853  | 1.616955445  |
| ENSORLG00000011420  | flrt2a           | retelin 2a [Source:ZFIN;Acc:ZDB-GENE-020430-3]                                                                                                        | 4.018369917 | 1.627225072  | 0.473618607   | 2.865248538  |
| ENSORLG00000002662  | klf1             | ALX homeobox 1 [Source:ZFIN;Acc:ZDB-GENE-050419-191]                                                                                                  | 6.668032981 | 1.482827642  | -1.191548238  | 3.994147461  |
| ENSORLG00000010152  | slc1key-40a16    | -                                                                                                                                                     | 5.872529451 | 1.721472199  | -3.528729587  | 0.622811846  |
| ENSORLG00000007513  | pad2 (1 of 2)    | peptidyl arginine deiminase, type II [Source:ZFIN;Acc:ZDB-GENE-031116-67]                                                                             | 3.600621378 | 1.082378069  | -0.087558438  | 2.431169965  |
| ENSORLG00000006820  | tapbp2           | TAP binding protein (tapasin), tandem duplicate 2 [Source:ZFIN;Acc:ZDB-GENE-060503-136]                                                               | 3.614620974 | 0.501784518  | -1.09467227   | 2.018649344  |
| ENSORLG00000016491  | tcf21            | transcription factor 21 [Source:NCBI gene:Acc:101172550]                                                                                              | 4.862042343 | 2.267957811  | -2.504920216  | 0.089649352  |
| ENSORLG00000017816  | adam23a          | ADAM metalloproteinase domain 23a [Source:ZFIN;Acc:ZDB-GENE-070810-2]                                                                                 | 5.360861445 | 4.166487422  | 1.114544917   | 2.309408574  |
| ENSORLG00000017867  | klh16            | kelch-like family member 6 [Source:ZFIN;Acc:ZDB-GENE-030616-325]                                                                                      | 3.555255357 | 1.332428982  | -1.15329744   | 1.070013114  |
| ENSORLG000000005892 | rtho             | ras homolog family member H [Source:ZFIN;Acc:ZDB-GENE-080228-7]                                                                                       | 16.28812344 | 13.18025262  | -3.024804484  | 0.063534741  |
| ENSORLG00000004009  | ra               | coagulation factor IIIa [Source:ZFIN;Acc:ZDB-GENE-071119-51]                                                                                          | 5.737660864 | 3.257996155  | 0.225247945   | 2.705396291  |
| ENSORLG000000009587 | ovalb1 (1 of 2)  | ovalbumin beta [Source:NCBI gene:Acc:105353532]                                                                                                       | 5.928888408 | -0.566281851 | -7.240173716  | -0.746517906 |
| ENSORLG000000003117 | slc25a15a        | solute carrier family 25 (mitochondrial carrier, carnitine transporter) member 15a [Source:ZFIN;Acc:ZDB-GENE-070112-1072]                             | 4.15862002  | 0.232465212  | -0.999709698  | 2.936928998  |
| ENSORLG00000014284  | slc21l1-125m     | slc21l1-125m10.6 [Source:ZFIN;Acc:ZDB-GENE-120708-92]                                                                                                 | 4.111954558 | 1.965499092  | 0.587386643   | 2.734328839  |
| ENSORLG00000015530  | -                | -                                                                                                                                                     | 3.284623089 | 0.274466721  | -0.692731993  | 2.317909192  |
| ENSORLG00000011401  | bhhhe41          | Oryzias latipes basic helix-loop-helix family member e41 (bhhhe41), mRNA [Source:RefSeq mRNA;Acc:NM_001104733]                                        | 3.073472956 | 1.141864928  | -1.936357817  | -0.004264842 |
| ENSORLG00000012348  | ogal             | O-GlcNAcase like [Source:ZFIN;Acc:ZDB-GENE-110914-153]                                                                                                | 3.278644908 | -1.099024771 | -3.455158196  | 0.922996118  |

|                     |                 |                                                                                                   |             |              |              |              |
|---------------------|-----------------|---------------------------------------------------------------------------------------------------|-------------|--------------|--------------|--------------|
| ENSORLG00000015048  | C2orf88         | chromosome 2 open reading frame 88 [Source:HGNC Symbol;Acc:HGNC:28191]                            | 3.535135819 | 0.854405847  | -0.482384765 | 2.198830061  |
| ENSORLG00000011088  | cpwm1b          | carboxypeptidase Y (M14 family), member 1b [Source:ZFIN;Acc:ZDB-GENE-141212-305]                  | 4.271181926 | 2.202590541  | -1.771672451 | 0.297403404  |
| ENSORLG00000010688  | rhoa            | ras homolog family member U [Source:NCBI gene;Acc:101157689]                                      | 3.939584267 | 1.202396241  | -0.256605178 | 2.481067755  |
| ENSORLG00000003905  | vip             | vasoactive intestinal peptide [Source:ZFIN;Acc:ZDB-GENE-080204-3]                                 | 16.35431947 | 13.33629176  | -1.99874761  | 1.019747849  |
| ENSORLG000000011149 | pgam2           | phosphoglycerate mutase 2 [Source:NCBI gene;Acc:101164987]                                        | 4.032974678 | -1.063991598 | -2.644438271 | 2.453014628  |
| ENSORLG00000012439  | cor9b           | chemokine (C-C motif) receptor 9b [Source:ZFIN;Acc:ZDB-GENE-070301-3]                             | 4.971399848 | -0.121162998 | -3.169039519 | 1.924009239  |
| ENSORLG00000011223  | -               | -                                                                                                 | 3.989955976 | 1.218777397  | 0.184919786  | 2.936583245  |
| ENSORLG00000005875  | rap2b           | RAP2B, member of RAS oncogene family [Source:NCBI gene;Acc:101171097]                             | 3.145284078 | 0.398047487  | -1.209149764 | 1.539571505  |
| ENSORLG00000017559  | -               | -                                                                                                 | 4.182752238 | 1.812160501  | -1.588771116 | 0.962308035  |
| ENSORLG00000022372  | rbp5            | retinol-binding protein 1 [Source:NCBI gene;Acc:101173969]                                        | 4.043980608 | 2.725087297  | -0.135419113 | 1.183959131  |
| ENSORLG000000011403 | si.ch211-283g   | si.ch211-283g.1 [Source:ZFIN;Acc:ZDB-GENE-060531-57]                                              | 4.724113005 | 0.106155063  | -1.888402664 | 2.73004286   |
| ENSORLG00000016003  | trmc2b          | transmembrane and tetrapeptide repeat containing 2b [Source:ZFIN;Acc:ZDB-GENE-081031-100]         | 4.366698524 | 2.133443846  | -1.311828083 | 0.921911304  |
| ENSORLG00000007701  | lam43a          | family with sequence similarity 43, member A [Source:ZFIN;Acc:ZDB-GENE-030131-6098]               | 5.223660451 | 2.585321436  | -0.973994235 | 1.664831089  |
| ENSORLG000000013410 | ca8             | carbonic anhydrase VIII [Source:ZFIN;Acc:ZDB-GENE-050417-28]                                      | 4.219175593 | 2.805951068  | 0.5873468    | 2.00105587   |
| ENSORLG000000011140 | lhbfb           | lin bud initiation factor b [Source:ZFIN;Acc:ZDB-GENE-050417-423]                                 | 4.279080934 | 1.586945899  | -2.399753636 | 0.292865488  |
| ENSORLG00000014549  | -               | -                                                                                                 | 5.785538014 | 1.72045307   | -3.050232135 | 1.515281424  |
| ENSORLG000000014947 | proxa1          | prospero homeobox 1a [Source:ZFIN;Acc:ZDB-GENE-980526-397]                                        | 4.718422639 | -0.182825307 | -2.77442591  | 2.14288880   |
| ENSORLG00000004632  | smad5           | smad family member 5 [Source:ZFIN;Acc:ZDB-GENE-031202-1]                                          | 3.438425812 | 0.049220448  | -1.261002095 | 2.128689292  |
| ENSORLG00000002207  | SMAD3 (1 of 3)  | SMAD family member 3 [Source:HGNC Symbol;Acc:HGNC:6769]                                           | 5.026545179 | 1.660669315  | -0.455299120 | 2.911011173  |
| ENSORLG000000016766 | foxd2           | Oryzias latipes forkhead box D1 (LOC100302451), mRNA [Source:RefSeq mRNA;Acc:NM_001163182]        | 6.479888816 | 1.162143847  | -2.687519556 | 2.630710901  |
| ENSORLG00000013204  | sypl1           | synaptophysin-like 1 [Source:ZFIN;Acc:ZDB-GENE-110420-2]                                          | 4.162301837 | 1.828402605  | -0.60616575  | 1.72821796   |
| ENSORLG00000009593  | stll            | stll-like [Source:ZFIN;Acc:ZDB-GENE-081222-1]                                                     | 5.437087028 | -0.63719021  | -3.21717571  | 2.857713792  |
| ENSORLG00000021288  | RF00016         | small nucleolar RNA SNORD14 [Source:NCBI gene;Acc:11946368]                                       | 4.228693812 | 2.903699853  | 0.139203192  | 1.464681741  |
| ENSORLG000000016840 | shb             | Src homology 2 domain containing transforming protein D, h [Source:ZFIN;Acc:ZDB-GENE-030131-6059] | 3.507153889 | 0.483387053  | -3.208671168 | -0.18441982  |
| ENSORLG00000006251  | papsa2a         | 3-phosphoadenosine 5-phosphosulfate synthase 2a [Source:ZFIN;Acc:ZDB-GENE-061110-85]              | 5.140574592 | 0.84977357   | -2.011986519 | 2.279300165  |
| ENSORLG00000013436  | col10a1a        | collagen, type X, alpha 1a [Source:ZFIN;Acc:ZDB-GENE-030131-8373]                                 | 8.251319674 | 3.937806087  | -5.523429373 | 0.790570277  |
| ENSORLG00000009008  | srpx            | sushi-repeat containing protein, X-linked [Source:ZFIN;Acc:ZDB-GENE-050327-43]                    | 4.505766182 | 1.889307079  | -2.189430471 | 0.42751395   |
| ENSORLG00000015829  | tnfrsf82b       | tumor necrosis factor, alpha-induced protein 8-like 2b [Source:ZFIN;Acc:ZDB-GENE-040476-1359]     | 3.917098428 | 1.333753311  | -2.011383465 | 0.572446434  |
| ENSORLG00000014002  | fam129ba        | family with sequence similarity 129, member 8a [Source:ZFIN;Acc:ZDB-GENE-070112-1222]             | 3.435131797 | 1.145744326  | -1.144526162 | 1.145346714  |
| ENSORLG00000006948  | -               | -                                                                                                 | 5.38091732  | 1.721918328  | -1.475902086 | 2.235802318  |
| ENSORLG000000016809 | lox2a           | lyal oxidase-like 2a [Source:ZFIN;Acc:ZDB-GENE-070818-1]                                          | 4.374687433 | 2.516249822  | -2.094504952 | -0.23582413  |
| ENSORLG000000001417 | -               | uncharacterized LOC101173999 [Source:NCBI gene;Acc:101173999]                                     | 6.406828857 | 1.541152052  | -2.694076791 | 2.172084239  |
| ENSORLG00000008863  | GN2             | G protein subunit gamma 2 [Source:NCBI gene;Acc:101157742]                                        | 4.310334323 | 2.232946204  | -1.758883426 | 0.318989638  |
| ENSORLG00000001089  | inka1a          | family with sequence similarity 212, member Aa [Source:ZFIN;Acc:ZDB-GENE-060312-186]              | 3.979052322 | 0.165002892  | -1.621506596 | 2.19302767   |
| ENSORLG00000007071  | coro2a          | coronin, actin binding protein, 2A [Source:ZFIN;Acc:ZDB-GENE-030131-2258]                         | 3.741887206 | 1.788436049  | -1.236629473 | 0.717306671  |
| ENSORLG00000018019  | tpm4b           | tropomyosin alpha-4 chain [Source:NCBI gene;Acc:101167740]                                        | 4.672978049 | 2.42033338   | -0.852006957 | 1.40112244   |
| ENSORLG00000011062  | gabrr2a         | gamma-aminobutyric acid receptor subunit rho-2-like [Source:NCBI gene;Acc:101164606]              | 5.342871269 | 1.426624949  | -0.465080365 | 3.165164983  |
| ENSORLG00000001319  | -               | -                                                                                                 | 9.366266781 | 2.781728177  | -4.317149118 | 2.26787163   |
| ENSORLG00000017356  | zgc:86896       | zgc:86896 [Source:ZFIN;Acc:ZDB-GENE-040625-80]                                                    | 4.484280539 | -0.56356529  | -3.11468693  | 1.934263781  |
| ENSORLG00000012039  | si.ch211-286b   | si.ch211-286b.5 [Source:ZFIN;Acc:ZDB-GENE-121214-209]                                             | 3.443724586 | 0.819401159  | -1.774669046 | 0.850139571  |
| ENSORLG00000005073  | -               | -                                                                                                 | 4.164943795 | 2.725591839  | -1.379538577 | 0.110298231  |
| ENSORLG00000008122  | trfb            | thyroid hormone receptor beta [Source:NCBI gene;Acc:10089254]                                     | 3.527145056 | 1.330954616  | -0.64338016  | 1.553295272  |
| ENSORLG00000002243  | IGFBP5 (1 of 3) | insulin like growth factor binding protein 5 [Source:HGNC Symbol;Acc:HGNC:5474]                   | 5.912456109 | 2.468647129  | -2.776980605 | 0.667318076  |
| ENSORLG00000013995  | zfpm1           | zinc finger protein, FOS family member 1 [Source:ZFIN;Acc:ZDB-GENE-050419-238]                    | 3.143551064 | 1.707995114  | -1.107952965 | 0.328087904  |
| ENSORLG00000017329  | -               | -                                                                                                 | 4.417170161 | 0.566194302  | -2.495190757 | 1.356811846  |
| ENSORLG00000009717  | NKAIN4          | sodium/potassium transporting ATPase interacting 4 [Source:HGNC Symbol;Acc:HGNC:16191]            | 3.628193229 | 1.97925106   | 0.281795513  | 1.931247793  |
| ENSORLG00000002553  | -               | -                                                                                                 | 4.168717423 | 1.834878032  | -0.296969366 | 2.037629947  |
| ENSORLG000000003035 | slit3           | slit homolog 3 (Drosophila) [Source:ZFIN;Acc:ZDB-GENE-010306-4]                                   | 3.605266511 | 1.652977809  | -2.26889169  | -0.315919149 |
| ENSORLG00000007905  | gnb2            | guanine nucleotide-binding protein G(I)/G(S)/G(T) subunit beta-2 [Source:NCBI gene;Acc:101175500] | 4.187512919 | 2.402464853  | -0.860634249 | 0.924899131  |
| ENSORLG00000010699  | he1             | -                                                                                                 | 4.1732171   | 1.933171702  | -1.192148201 | 1.048431343  |
| ENSORLG00000011513  | -               | -                                                                                                 | 3.909355271 | 1.46306674   | -1.140936075 | 1.297418727  |
| ENSORLG00000006388  | -               | -                                                                                                 | 3.829737987 | 1.447841988  | -1.445533815 | 2.178618384  |
| ENSORLG00000006937  | HGNL2           | fidestatin like 2 [Source:HGNC Symbol;Acc:HGNC:13287]                                             | 4.671267761 | 1.529833181  | -1.29581885  | 1.846102314  |
| ENSORLG00000011259  | -               | -                                                                                                 | 4.683073054 | 0.025954734  | -1.701243916 | 2.956362011  |
| ENSORLG000000008827 | opn3            | Oryzias latipes opsin 3 (opn3), mRNA [Source:RefSeq mRNA;Acc:NM_001305403]                        | 4.764979146 | 1.495383346  | -0.866651001 | 2.403727511  |
| ENSORLG000000017126 | lrp2a           | LDL receptor related protein 2 [Source:NCBI gene;Acc:101157655]                                   | 3.600712741 | 2.341408303  | -1.05083372  | 0.208955384  |
| ENSORLG00000003467  | -               | -                                                                                                 | 3.9304468   | 0.28570895   | -1.893010445 | 1.746120042  |
| ENSORLG00000007942  | how5a           | homeobox protein How-C5a [Source:NCBI gene;Acc:101174425]                                         | 4.654316632 | 1.085206844  | -2.982853166 | 0.586740533  |
| ENSORLG00000001921  | -               | -                                                                                                 | 16.35706176 | 13.53107924  | -3.783104659 | -0.936664704 |
| ENSORLG00000005114  | -               | upstream transcription factor 2, c-fos interacting [Source:NCBI gene;Acc:101157563]               | 3.498964743 | 1.56918218   | 0.055786507  | 1.985917974  |
| ENSORLG00000016601  | NFIX (1 of 3)   | nuclear factor X [Source:HGNC Symbol;Acc:HGNC:29841]                                              | 3.034110215 | 0.77163588   | -2.957987819 | 0.68502602   |
| ENSORLG00000008780  | -               | -                                                                                                 | 3.00287353  | 0.423926224  | 0.281361013  | 2.860756728  |
| ENSORLG00000000589  | sb.zf81         | sb.zf81 [Source:ZFIN;Acc:ZDB-GENE-030131-9939]                                                    | 6.468245008 | 2.633858247  | -2.93702322  | 0.897849593  |
| ENSORLG000000010849 | SyDE2           | synapse defective rho G1 Fse homolog 2 [Source:HGNC Symbol;Acc:HGNC:29841]                        | 3.100736339 | 1.851022251  | -0.269715465 | 0.980483386  |
| ENSORLG000000014820 | trmc2a          | transmembrane and tetrapeptide repeat containing 2a [Source:ZFIN;Acc:ZDB-GENE-041210-299]         | 4.653672733 | 1.715463311  | -1.018768292 | 1.919928414  |
| ENSORLG00000010504  | grb5            | G protein-coupled receptor 85 [Source:ZFIN;Acc:ZDB-GENE-000710-2]                                 | 3.286033763 | 1.069980928  | -0.556372434 | 1.642166779  |
| ENSORLG00000004209  | lrga3b          | integrin, alpha 3b [Source:ZFIN;Acc:ZDB-GENE-050411-55]                                           | 3.07246717  | 0.30235454   | -1.61174513  | 1.15885274   |
| ENSORLG00000009759  | -               | -                                                                                                 | 5.191602238 | 3.239079201  | -0.511990815 | 1.441016931  |
| ENSORLG000000050110 | si.ch211-248a   | si.ch211-248a1.4.8 [Source:ZFIN;Acc:ZDB-GENE-131126-33]                                           | 6.505734281 | -1.139569607 | -5.229975916 | 2.415822395  |

|                     |                  |                                                                                                                                               |             |              |              |              |
|---------------------|------------------|-----------------------------------------------------------------------------------------------------------------------------------------------|-------------|--------------|--------------|--------------|
| ENSRGLG0000017782   | lmp3             | bone morphogenetic protein 3 [Source:ZFIN;Acc:ZDB-GENE-030131-7192]                                                                           | 3.089580896 | 1.884533243  | -2.270578687 | -1.065045061 |
| ENSRGLG0000017737   | lpc-113531       | lpc-113531 [Source:ZFIN;Acc:ZDB-GENE-050320-52]                                                                                               | 3.825489067 | 2.067083597  | -1.803375347 | -0.04448507  |
| ENSRGLG0000016128   | lptma            | protein tyrosine phosphatase, receptor type, Na [Source:ZFIN;Acc:ZDB-GENE-030131-3511]                                                        | 3.897617267 | 0.859071386  | -1.99054886  | 1.048481498  |
| ENSRGLG0000015091   | lpto2b           | neopilin (NRP) and telodilin (TL1)-like 2b [Source:ZFIN;Acc:ZDB-GENE-060503-638]                                                              | 3.525863123 | -1.178433242 | -1.311631979 | 3.393144814  |
| ENSRGLG0000008253   | -                | integral membrane protein 2B [Source:NCBI;Gene:Acc:101159208]                                                                                 | 4.34866932  | 0.945932365  | -0.43139416  | 2.972824325  |
| ENSRGLG0000013506   | lrm35-28         | tripeptide motif containing 35-28 [Source:ZFIN;Acc:ZDB-GENE-071004-19]                                                                        | 3.215178403 | 0.803973507  | -1.164629304 | 1.24706043   |
| ENSRGLG0000007274   | -                | -                                                                                                                                             | 3.448862706 | 1.460899714  | 1.052045521  | 2.084028842  |
| ENSRGLG0000013893   | -                | -                                                                                                                                             | 3.23742671  | 1.011584831  | -3.10898421  | -0.892925604 |
| ENSRGLG0000000859   | gla              | galactosidase, alpha [Source:ZFIN;Acc:ZDB-GENE-041010-207]                                                                                    | 6.184978566 | 2.537292726  | -1.889050289 | 1.760120613  |
| ENSRGLG0000010035   | lor1             | sortilin-related receptor, (LDLR class) A repeats containing [Source:ZFIN;Acc:ZDB-GENE-050208-22]                                             | 3.850349011 | 0.474372133  | -0.829668858 | 2.54679217   |
| ENSRGLG0000000044   | lcor             | ligand dependent nuclear receptor corepressor [Source:ZFIN;Acc:ZDB-GENE-061201-6]                                                             | 4.706256972 | 1.634427619  | -3.062813612 | 0.009500982  |
| ENSRGLG0000010563   | neurod1          | neuronal differentiation 1 [Source:ZFIN;Acc:ZDB-GENE-990415-172]                                                                              | 4.846487888 | -0.982146533 | -1.454662597 | 4.37444934   |
| ENSRGLG0000015279   | nr4a1            | nuclear receptor subfamily 4 group A member 1 [Source:NCBI;Gene:Acc:101175402]                                                                | 16.50913014 | 10.81534326  | -1.063812998 | 4.630441331  |
| ENSRGLG00000100164  | MMP23B           | matrix metalloproteinase 23B [Source:HGNC;Symbol:Acc:HGNC:71711]                                                                              | 4.07650745  | 1.929700436  | -2.21680184  | -0.06969012  |
| ENSRGLG0000009016   | WDFY4            | WDFY family member 4 [Source:HGNC;Symbol:Acc:HGNC:29323]                                                                                      | 3.370878576 | 2.449874331  | 0.618288523  | 1.539777324  |
| ENSRGLG0000000386   | wdr45            | WD repeat domain 45 [Source:NCBI;Gene:Acc:101160923]                                                                                          | 3.186911631 | 0.326805366  | -1.197467961 | 1.663123304  |
| ENSRGLG0000004106   | wlx4b            | homeobox protein Dlx4b [Source:NCBI;Gene:Acc:101157253]                                                                                       | 6.56101539  | 0.487802331  | -1.867183556 | 4.206513686  |
| ENSRGLG0000011451   | aspdh            | aspartate dehydrogenase domain containing [Source:NCBI;Gene:Acc:101155692]                                                                    | 6.147647262 | -10.78902821 | -2.810723704 | 14.12646814  |
| ENSRGLG0000007831   | -                | -                                                                                                                                             | 4.363906154 | 2.370345568  | -0.784264579 | 1.199781531  |
| ENSRGLG00000002929  | -                | -                                                                                                                                             | 5.074466803 | 3.098064128  | -2.877011586 | -0.900126193 |
| ENSRGLG0000009332   | cdk17            | cyclin-dependent kinase 17 [Source:ZFIN;Acc:ZDB-GENE-041210-15]                                                                               | 3.790375387 | 1.477358535  | -0.10291719  | 2.305212097  |
| ENSRGLG0000016577   | tspan35          | tetraspanin-1 [Source:NCBI;Gene:Acc:101164063]                                                                                                | 16.51301477 | 14.68168973  | -1.689923465 | 0.141868806  |
| ENSRGLG0000018018   | lymb             | lysine-protein kinase fyn [Source:NCBI;Gene:Acc:101167011]                                                                                    | 3.886988119 | 1.173821342  | -1.420880593 | 1.292770749  |
| ENSRGLG0000004239   | erfl1a           | ERBB receptor feedback inhibitor 1a [Source:ZFIN;Acc:ZDB-GENE-030131-6256]                                                                    | 4.539676449 | 1.049441294  | -1.150362447 | 2.34058213   |
| ENSRGLG0000006924   | lrf1             | lymphoid enhancer binding factor 1 [Source:NCBI;Gene:Acc:101167344]                                                                           | 3.368269797 | 2.73401013   | -1.62069018  | -0.825336594 |
| ENSRGLG00000004417  | -                | -                                                                                                                                             | 4.115372164 | 1.980415595  | 0.711979957  | 2.847421041  |
| ENSRGLG0000001328   | GLI2             | GLI family zinc finger 2 [Source:HGNC;Symbol:Acc:HGNC:4318]                                                                                   | 3.885008927 | 1.307922896  | -1.761083034 | 0.816484796  |
| ENSRGLG0000011013   | cdkn1d           | cyclin-dependent kinase inhibitor 1D [Source:ZFIN;Acc:ZDB-GENE-110215-1]                                                                      | 4.454353512 | 1.438416957  | -2.40097007  | 0.615484487  |
| ENSRGLG0000014059   | slc1key-11018    | slc1key-11018.5 [Source:ZFIN;Acc:ZDB-GENE-091204-110]                                                                                         | 3.142778906 | 0.095800588  | -2.904322396 | 0.15314154   |
| ENSRGLG0000016724   | CYT11            | cytochrome like 1 [Source:HGNC;Symbol:Acc:HGNC:24433]                                                                                         | 4.494853114 | 2.736907537  | -2.315784192 | -0.557353708 |
| ENSRGLG0000006116   | -                | -                                                                                                                                             | 3.203471015 | 0.239563177  | -1.997201917 | 0.967190569  |
| ENSRGLG0000010381   | arid3a           | arrestin domain containing 3a [Source:ZFIN;Acc:ZDB-GENE-030131-2913]                                                                          | 3.031404481 | 0.667870604  | -1.053765497 | 1.310253436  |
| ENSRGLG00000005170  | adamts16         | ADAM metalloproteinase with thrombospondin type 1 motif 16 [Source:ZFIN;Acc:ZDB-GENE-130530-760]                                              | 4.093660174 | 0.771665235  | -0.73518961  | 2.587291597  |
| ENSRGLG0000016607   | gpr182           | G protein-coupled receptor 182 [Source:ZFIN;Acc:ZDB-GENE-030131-2381]                                                                         | 4.001093415 | 0.582986678  | -4.129129214 | -0.710539184 |
| ENSRGLG0000011437   | paln1b           | paralemnin 1b [Source:ZFIN;Acc:ZDB-GENE-040426-1147]                                                                                          | 3.692382653 | 1.539104898  | -0.689029382 | 1.464732834  |
| ENSRGLG0000003577   | -                | -                                                                                                                                             | 3.518497147 | 2.627812059  | -3.221567067 | -2.332396092 |
| ENSRGLG0000007597   | hoxa13b          | homeobox protein Hox-A13b [Source:NCBI;Gene:Acc:101158301]                                                                                    | 3.248963728 | -0.009230817 | -3.419839615 | -0.163195958 |
| ENSRGLG00000008830  | prodhb           | proline dehydrogenase (oxidase) 1b [Source:ZFIN;Acc:ZDB-GENE-101116-1]                                                                        | 5.986990298 | 1.873682933  | -2.434917568 | 1.678867828  |
| ENSRGLG0000007524   | sh3c2            | SH3 domain and tetratricopeptide repeats 2 [Source:ZFIN;Acc:ZDB-GENE-081104-347]                                                              | 3.554517673 | 1.973960176  | -0.461557863 | 1.119485803  |
| ENSRGLG00000005052  | angpt7           | angiotensin-like 7 [Source:ZFIN;Acc:ZDB-GENE-041010-175]                                                                                      | 3.864282154 | 0.006547595  | -1.255722833 | 2.602475363  |
| ENSRGLG0000005884   | -                | -                                                                                                                                             | 4.880611915 | 2.412227635  | -2.334355062 | 0.134514187  |
| ENSRGLG0000013932   | slc6a4a          | solute carrier family 6 (neurotransmitter transporter), member 4a [Source:ZFIN;Acc:ZDB-GENE-060314-1]                                         | 6.26110213  | 2.667396477  | -1.54419831  | 2.049990592  |
| ENSRGLG0000016819   | errg2            | Oryzias latipes estrogen-related receptor gamma type 2 (errg2), mRNA [Source:RefSeq; mRNA:Acc:NM_001630921]                                   | 4.21523115  | 0.835459377  | -3.447870319 | -0.067613644 |
| ENSRGLG0000014173   | sema3ga          | sema domain, immunoglobulin domain (Ig), short basic domain, secreted (semaphorin) 3ga [Source:ZFIN;Acc:ZDB-GENE-050513-3]                    | 7.422530852 | 4.317806364  | -1.265918506 | 1.839272953  |
| ENSRGLG0000012878   | igfbp1a          | insulin-like growth factor binding protein 1a [Source:ZFIN;Acc:ZDB-GENE-021231-11]                                                            | 3.577059663 | 1.379049464  | -2.760675216 | -0.562379602 |
| ENSRGLG0000004717   | nrx1a            | neuroligin 1a [Source:ZFIN;Acc:ZDB-GENE-030519-2]                                                                                             | 3.788519723 | 1.814491539  | -2.237968506 | -0.26345434  |
| ENSRGLG0000009648   | PLCB4            | phospholipase C beta 4 [Source:HGNC;Symbol:Acc:HGNC:9059]                                                                                     | 3.713236316 | 0.912255556  | -1.249854282 | 1.551612307  |
| ENSRGLG00000099550  | usp12b           | ubiquitin specific peptidase 12b [Source:ZFIN;Acc:ZDB-GENE-100209-4]                                                                          | 3.69089955  | 2.19118712   | -0.737916604 | 0.762281359  |
| ENSRGLG0000011632   | map4k2           | mitogen-activated protein kinase kinase kinase 2 [Source:ZFIN;Acc:ZDB-GENE-030816-163]                                                        | 3.193496145 | 1.191884091  | 0.851394383  | 2.853491219  |
| ENSRGLG0000012050   | slc1a1           | solute carrier family 1 (neuronal/epithelial high affinity glutamate transporter, system Xag), member 1 [Source:ZFIN;Acc:ZDB-GENE-040718-414] | 5.12811671  | 0.521278599  | -3.155361974 | 1.451959586  |
| ENSRGLG0000018045   | sggp1            | sphingosine-1-phosphate phosphatase 1 [Source:NCBI;Gene:Acc:101173595]                                                                        | 3.922684421 | 1.309350175  | -1.404895338 | 1.208923488  |
| ENSRGLG0000014982   | itih6l           | itih6-like 1 [Source:ZFIN;Acc:ZDB-GENE-070705-]                                                                                               | 4.727392383 | 1.627298919  | -2.07362982  | 1.026950861  |
| ENSRGLG000001001403 | aeap1            | AE binding protein 1 [Source:ZFIN;Acc:ZDB-GENE-030131-2390]                                                                                   | 3.274901691 | 2.221856237  | -1.683842674 | -0.630312434 |
| ENSRGLG00000009111  | TGFbeta3 (1 of m | transforming growth factor beta 3 [Source:HGNC;Symbol:Acc:HGNC:11768]                                                                         | 7.842295889 | 2.147548821  | -2.44967092  | 3.245570971  |
| ENSRGLG00000027078  | yap1             | Yes-associated protein 1 [Source:ZFIN;Acc:ZDB-GENE-030131-9710]                                                                               | 4.545378891 | 1.42683095   | -1.173891885 | 1.945141138  |
| ENSRGLG0000006715   | scap1            | ARCAP with coiled-coil, ankyrin repeat and PH domains 1 [Source:ZFIN;Acc:ZDB-GENE-070112-1242]                                                | 4.227540843 | 1.809140017  | -1.580127477 | 0.838758771  |
| ENSRGLG0000011984   | trmem267         | transmembrane protein 267 [Source:NCBI;Gene:Acc:101188970]                                                                                    | 3.066815753 | 0.907364269  | 0.100334172  | 2.260270923  |
| ENSRGLG00000005747  | pa2a             | growth arrest-specific 2a [Source:ZFIN;Acc:ZDB-GENE-091011-3]                                                                                 | 3.019984021 | 1.202236153  | -1.277705476 | 0.540526896  |
| ENSRGLG0000013803   | -                | -                                                                                                                                             | 3.37170180  | 0.682861557  | -0.289920289 | 2.845525232  |
| ENSRGLG0000012936   | STMN2            | stathmin 2 [Source:NCBI;Gene:Acc:101167833]                                                                                                   | 3.681053466 | -1.745241123 | -1.458607769 | 3.97417162   |
| ENSRGLG0000011963   | -                | -                                                                                                                                             | 3.950703277 | 1.032068973  | -0.749918063 | 2.169201221  |
| ENSRGLG0000013231   | pa345ba          | growth arrest and DNA damage inducible beta [Source:NCBI;Gene:Acc:101165223]                                                                  | 6.290887289 | 2.254651089  | -1.922800702 | 2.1192147    |
| ENSRGLG0000009061   | batf             | basic leucine zipper ATF-like transcription factor [Source:NCBI;Gene:Acc:101168259]                                                           | 4.098489244 | -0.299593968 | -4.899677028 | -0.501107495 |
| ENSRGLG00000005084  | nk42b            | NK42 myocardin-like 2b [Source:ZFIN;Acc:ZDB-GENE-030619-16]                                                                                   | 5.337820122 | 2.598360799  | -1.478266431 | 1.261677367  |
| ENSRGLG0000014427   | -                | -                                                                                                                                             | 6.008456555 | 3.16957661   | -1.490405921 | 1.34895362   |
| ENSRGLG0000013732   | -                | -                                                                                                                                             | 4.688784687 | 1.203737583  | -2.581421729 | 0.904109866  |

|                     |                 |                                                                                                                                                                 |             |              |              |              |
|---------------------|-----------------|-----------------------------------------------------------------------------------------------------------------------------------------------------------------|-------------|--------------|--------------|--------------|
| ENSORLG00000017443  | pyva            | peptide YY [Source:ZFIN;Acc:ZDB-GENE-980526-71]                                                                                                                 | 16.45547444 | 12.62655777  | -1.356472102 | 2.472911241  |
| ENSORLG00000012150  | si.ch211-9419   | mvoan ID [Source:HGNC;Symbol:Acc:HGNC:7598]                                                                                                                     | 3.028992925 | 0.606936041  | -1.114492392 | 1.308015024  |
| ENSORLG00000004181  | ker18           | keratin, type I cytoskeletal 18 [Source:NCBI;gene:Acc:101168952]                                                                                                | 4.850501755 | 2.510799378  | -0.2163917   | 2.123795665  |
| ENSORLG00000004100  | -               | -                                                                                                                                                               | 4.267511435 | 3.133652771  | -0.940321954 | 0.194020073  |
| ENSORLG00000006846  | si.dkey-33c9.6  | si.dkey-33c9.6 [Source:ZFIN;Acc:ZDB-GENE-130530-592]                                                                                                            | 5.507517836 | 2.869592796  | -2.782979603 | -0.144571185 |
| ENSORLG00000002432  | myl23           | myosin, light polypeptide 3, skeletal muscle [Source:ZFIN;Acc:ZDB-GENE-003072-6]                                                                                | 5.402077038 | -1.397813519 | -5.748199985 | 1.052216425  |
| ENSORLG00000006389  | mvo10           | mvoan X [Source:ZFIN;Acc:ZDB-GENE-070912-277]                                                                                                                   | 3.342240994 | 0.236802091  | -1.789325323 | 1.316597834  |
| ENSORLG00000003417  | -               | -                                                                                                                                                               | 4.136938909 | 2.20093607   | -1.237152514 | 0.699334968  |
| ENSORLG000000015524 | arhgap25        | Rho GTPase activating protein 25 [Source:ZFIN;Acc:ZDB-GENE-080526-210]                                                                                          | 4.429672168 | 1.684297379  | -2.776718286 | -0.030857105 |
| ENSORLG00000006372  | -               | -                                                                                                                                                               | 4.084726365 | 0.550045476  | -1.76836013  | 1.768805524  |
| ENSORLG00000004723  | tyrp1b          | 5,6-dihydroxyindole-2-carboxylic acid oxidase-like [Source:NCBI;gene:Acc:101161262]                                                                             | 5.682312292 | 1.124736006  | -2.771299632 | 1.786761218  |
| ENSORLG000000015054 | slc7a10a        | solute carrier family 7 (neutral amino acid transporter light chain, asc system), member 10a [Source:ZFIN;Acc:ZDB-GENE-080116-11]                               | 3.930482435 | 0.665494019  | -2.117011291 | 1.148462     |
| ENSORLG000000012362 | -               | -                                                                                                                                                               | 5.942252525 | 0.550525372  | -2.953010565 | 2.439147578  |
| ENSORLG00000007559  | -               | -                                                                                                                                                               | 4.195968684 | 1.443437716  | -0.97667789  | 1.776338213  |
| ENSORLG000000010896 | caonb2a         | calcium channel, voltage-dependent, beta 2a [Source:ZFIN;Acc:ZDB-GENE-080808-7]                                                                                 | 3.614404716 | 1.662282348  | -0.247394    | 1.705213725  |
| ENSORLG000000010223 | cpt1b           | carotid palmitoyltransferase 1B (muscle) [Source:ZFIN;Acc:ZDB-GENE-041010-8]                                                                                    | 8.134984929 | 3.439354748  | -3.733687758 | 0.962367438  |
| ENSORLG00000017706  | -               | -                                                                                                                                                               | 16.19307637 | 9.747504889  | -16.19307117 | -9.747521673 |
| ENSORLG000000014672 | srbf2           | steroid regulatory element binding transcription factor 2 [Source:ZFIN;Acc:ZDB-GENE-070410-8]                                                                   | 3.508790389 | 0.550616747  | -1.574471197 | 1.384187606  |
| ENSORLG000000006825 | smad6b          | SMAD family member 6b [Source:ZFIN;Acc:ZDB-GENE-050419-196]                                                                                                     | 4.582125765 | 0.932913066  | -1.443453948 | 2.206243705  |
| ENSORLG000000008238 | gamt            | guanineacetate N-methyltransferase [Source:NCBI;gene:Acc:101166292]                                                                                             | 5.694387284 | 0.990345661  | -3.674361432 | 1.030165187  |
| ENSORLG000000016055 | ADORA1          | adenosine A1 receptor [Source:HGNC;Symbol:Acc:HGNC:287]                                                                                                         | 4.526309257 | 1.971708423  | -1.32940924  | 1.225680185  |
| ENSORLG000000011360 | lmo7a           | LIM domain 7a [Source:ZFIN;Acc:ZDB-GENE-030219-solute carrier family 29 (equilibrative nucleoside transporter), member 1a [Source:ZFIN;Acc:ZDB-GENE-050913-138] | 4.508328551 | -0.152425367 | -1.757553705 | 2.901885122  |
| ENSORLG00000004888  | slc29a1a        | solute carrier family 29 (equilibrative nucleoside transporter), member 1a [Source:ZFIN;Acc:ZDB-GENE-050913-138]                                                | 3.851521645 | 1.148285172  | -0.80667459  | 1.897046842  |
| ENSORLG000000013509 | -               | -                                                                                                                                                               | 3.613571996 | 0.813002705  | -0.355706688 | 2.445347781  |
| ENSORLG000000013721 | mao             | monoamine oxidase [Source:ZFIN;Acc:ZDB-GENE-040328-3]                                                                                                           | 3.523591949 | 2.312388013  | -2.325250064 | -1.113561146 |
| ENSORLG00000006273  | inpp5f5b        | inositol polyphosphate-5-phosphatase 5b [Source:ZFIN;Acc:ZDB-GENE-081104-46]                                                                                    | 3.906322843 | 1.706251757  | -0.576903727 | 1.623651739  |
| ENSORLG000000003376 | znc110333       | Zinc finger protein 110333 [Source:ZFIN;Acc:ZDB-GENE-050417-331]                                                                                                | 17.20671029 | 11.27188317  | -2.74501251  | 3.18079393   |
| ENSORLG000000012903 | znc110332       | zinc finger protein 110332 [Source:ZFIN;Acc:ZDB-GENE-081031-95]                                                                                                 | 3.152661302 | 1.442479875  | -1.02113898  | 0.689527697  |
| ENSORLG000000017224 | sg12l1          | Oryzias latipes interferon alpha-inducible protein 27, mitochondrial-like (sg12l1), mRNA [Source:RefSeq; mRNA:Acc:NM_001278818]                                 | 3.181570772 | 2.041828131  | 0.681981242  | 1.822208441  |
| ENSORLG000000016264 | slc34a2b        | sodium-dependent phosphate transport protein 2B [Source:NCBI;gene:Acc:10117337]                                                                                 | 5.602935247 | 0.719351834  | -2.602973957 | 2.281095277  |
| ENSORLG000000007059 | dnc2            | D-amino-acid oxidase, tandem duplicate 2 [Source:ZFIN;Acc:ZDB-GENE-040476-2634]                                                                                 | 5.497121089 | 0.916152201  | -1.589242416 | 2.99221147   |
| ENSORLG000000017976 | se              | serpin family B member 1 [Source:NCBI;gene:Acc:101165527]                                                                                                       | 3.313086715 | 1.512812813  | -1.22753483  | 0.573223673  |
| ENSORLG00000002603  | ker222          | keratin 222 [Source:ZFIN;Acc:ZDB-GENE-070912-343]                                                                                                               | 15.81300458 | 12.45453578  | -2.205634672 | 1.153320138  |
| ENSORLG00000005407  | klf3            | Kruppel like factor 3 [Source:HGNC;Symbol:Acc:HGNC:16516]                                                                                                       | 3.052009181 | 0.142563229  | -1.822400555 | 1.087530273  |
| ENSORLG00000005296  | angptl4         | angiopoietin-like 4 [Source:ZFIN;Acc:ZDB-GENE-041111-222]                                                                                                       | 5.003270394 | 2.275079891  | -1.449896036 | 1.278780226  |
| ENSORLG000000016187 | HHI             | human histone H4 [Source:HGNC;Symbol:Acc:HGNC:1141]                                                                                                             | 5.250547025 | -0.180140799 | -3.038677422 | 2.392495264  |
| ENSORLG00000004013  | twsg1a          | twisted gastrulation BMP signaling modulator 1 [Source:NCBI;gene:Acc:101172607]                                                                                 | 3.881589304 | 2.165381876  | -1.097988229 | 0.618704117  |
| ENSORLG000000013847 | knq2a           | inward rectifier potassium channel 2 [Source:NCBI;gene:Acc:101173391]                                                                                           | 3.621356149 | 1.558335581  | -1.609555495 | 0.453948066  |
| ENSORLG000000018140 | nenf            | neurexin neurotrophic factor [Source:NCBI;gene:Acc:101158154]                                                                                                   | 4.774939673 | 2.686210852  | 0.23904024   | 2.328253414  |
| ENSORLG00000001088  | h2ahy2          | H2A histone family, member Y2 [Source:ZFIN;Acc:ZDB-GENE-050913-114]                                                                                             | 3.701083622 | 0.56816011   | -0.361204323 | 2.772203964  |
| ENSORLG000000008263 | antir1          | smoothelin B [Source:ZFIN;Acc:ZDB-GENE-070912-2]                                                                                                                | 3.084533589 | 1.203052041  | -2.746388999 | -0.38433077  |
| ENSORLG00000006421  | -               | -                                                                                                                                                               | 5.038384624 | -0.674263864 | -4.580333358 | 1.13283015   |
| ENSORLG000000017246 | -               | -                                                                                                                                                               | 7.605588836 | 1.790998806  | -6.529461192 | -0.714386673 |
| ENSORLG000000004646 | rimk1a          | ribosomal modification protein rimk-like family member A [Source:ZFIN;Acc:ZDB-GENE-040912-29]                                                                   | 4.283700816 | 1.790173797  | -0.603951318 | 1.890060848  |
| ENSORLG000000013012 | phf2            | PHD finger protein 2 [Source:ZFIN;Acc:ZDB-GENE-050302-10]                                                                                                       | 3.628216111 | 0.887086623  | -0.662611808 | 2.079048215  |
| ENSORLG000000010337 | skv1b1          | alko-keto reductase family 1, member B1 (aldose reductase) [Source:ZFIN;Acc:ZDB-GENE-040625-7]                                                                  | 5.114969334 | 0.167743529  | -2.37907411  | 2.568636412  |
| ENSORLG000000010577 | spag9a          | sperm associated antigen 9a [Source:ZFIN;Acc:ZDB-GENE-070820-7]                                                                                                 | 4.908692437 | 2.155229412  | -0.72962196  | 2.024322173  |
| ENSORLG000000017480 | -               | -                                                                                                                                                               | 6.054135127 | 4.322833359  | -2.493885633 | -0.762098982 |
| ENSORLG000000005833 | -               | -                                                                                                                                                               | 4.24956813  | 2.457526183  | -0.248871351 | 1.543654733  |
| ENSORLG000000002068 | -               | -                                                                                                                                                               | 3.627490471 | 1.034728241  | 0.288222354  | 2.881469456  |
| ENSORLG000000014809 | -               | -                                                                                                                                                               | 3.885279994 | 0.32942374   | -1.129650404 | 2.426641294  |
| ENSORLG000000005880 | wnt2ba          | wingless-type MMTV integration site family, member 2Ba [Source:ZFIN;Acc:ZDB-GENE-030717-2]                                                                      | 6.623956743 | 2.65449191   | -2.023238707 | 1.946709897  |
| ENSORLG00000006089  | -               | -                                                                                                                                                               | 5.2361888   | 2.141735029  | -1.51071275  | 1.563867427  |
| ENSORLG000000012231 | -               | -                                                                                                                                                               | 3.543541877 | 1.16374021   | -0.587333184 | 1.799524460  |
| ENSORLG00000004915  | cfd4a           | C/EBP4 molecule [Source:NCBI;gene:Acc:101158776]                                                                                                                | 5.231951564 | 2.57876626   | -2.533786462 | 0.098846661  |
| ENSORLG000000014109 | abca1a          | ATP-binding cassette, sub-family A (ABC1), member 1A [Source:ZFIN;Acc:ZDB-GENE-031006-12]                                                                       | 3.415317728 | 1.454090485  | -0.421204107 | 1.540517628  |
| ENSORLG000000002227 | smad6a          | SMAD family member 6a [Source:ZFIN;Acc:ZDB-GENE-011015-1]                                                                                                       | 4.699180449 | 0.765481779  | -1.619605712 | 2.314578273  |
| ENSORLG000000005581 | -               | -                                                                                                                                                               | 5.641137516 | 1.270842636  | -1.812115136 | 2.556664833  |
| ENSORLG000000007617 | hwa10b          | homeobox protein Hox-A11b [Source:NCBI;gene:Acc:101158794]                                                                                                      | 3.744986933 | 0.735500592  | -2.27324389  | 0.736726449  |
| ENSORLG000000002005 | NRP1 (I of III) | neuropilin 1 [Source:HGNC;Symbol:Acc:HGNC:8004]                                                                                                                 | 3.89614831  | 1.544897309  | -1.994615897 | -0.149413864 |
| ENSORLG000000008341 | cdc4b           | phosphodiesterase 4C, cAMP-specific b [Source:ZFIN;Acc:ZDB-GENE-030131-4075]                                                                                    | 3.394468826 | 0.843943396  | -1.066175095 | 1.484833009  |
| ENSORLG000000017462 | zak             | sterile alpha motif and leucine zipper containing kinase AZK [Source:ZFIN;Acc:ZDB-GENE-070912-386]                                                              | 4.922693995 | 2.218853031  | -0.575081004 | 2.129246057  |
| ENSORLG000000010047 | -               | -                                                                                                                                                               | 4.55216777  | 2.595311892  | -1.339690788 | 0.620432877  |
| ENSORLG000000002943 | cldn11b         | claudin 11b [Source:ZFIN;Acc:ZDB-GENE-010328-13]                                                                                                                | 18.28213443 | 0            | -4.557981041 | 13.72464494  |
| ENSORLG000000003829 | ptger4b         | prostaglandin E receptor 4 (subtype EP4) b [Source:ZFIN;Acc:ZDB-GENE-060531-102]                                                                                | 4.96939269  | 0.902533535  | -3.449056394 | 0.618287389  |
| ENSORLG000000010012 | PRDX6           | peroxiredoxin 6 [Source:HGNC;Symbol:Acc:HGNC:11041]                                                                                                             | 4.577111041 | 0.347253733  | -2.45972322  | 1.77061878   |
| ENSORLG000000008569 | proxa           | protein X, vitamin K-dependent plasma glycoprotein a [Source:ZFIN;Acc:ZDB-GENE-061013-403]                                                                      | 3.873659007 | 1.707225881  | 0.199696889  | 2.366612413  |
| ENSORLG000000017475 | snai2           | snail family transcriptional repressor 2 [Source:NCBI;gene:Acc:101173267]                                                                                       | 3.783857967 | 1.442333815  | -1.648379507 | 0.693628938  |
| ENSORLG000000016383 | -               | -                                                                                                                                                               | 5.585278806 | 3.424164647  | -1.481773971 | 0.680108518  |
| ENSORLG000000016417 | -               | -                                                                                                                                                               | 3.907748821 | 2.541156127  | -0.346849452 | 1.6073883123 |
| ENSORLG000000006367 | aldoa           | fructose-bisphosphate aldolase A [Source:NCBI;gene:Acc:10049249]                                                                                                | 3.92921249  | 1.121857103  | -0.722496085 | 2.08534436   |

|                    |               |                                                                                                                                          |             |              |              |              |
|--------------------|---------------|------------------------------------------------------------------------------------------------------------------------------------------|-------------|--------------|--------------|--------------|
| ENSORLG00000014384 | iqsec2b       | IQ motif and Sec7 domain 2b [Source:ZFINAcc:ZDB-GENE-081105-73]                                                                          | 4.799091026 | 2.170266976  | -0.544278399 | 2.085030313  |
| ENSORLG00000016536 | -             | -                                                                                                                                        | 5.328912183 | 2.682623419  | -2.668914864 | -0.024140956 |
| ENSORLG00000006759 | -             | -                                                                                                                                        | 5.178147663 | 2.472157643  | -1.53473967  | 1.171699781  |
| ENSORLG00000008769 | sic5a2        | solute carrier family 5 (sodium/glucose cotransporter), member 2 [Source:ZFINAcc:ZDB-GENE-040426-2498]                                   | 6.037200971 | 1.129266941  | -4.383904055 | 0.52448558   |
| ENSORLG00000008332 | frp2          | secreted frizzled-related protein 2 [Source:ZFINAcc:ZDB-GENE-061013-293]                                                                 | 5.316925473 | 0.867469437  | -1.567923456 | 2.882027203  |
| ENSORLG00000012630 | -             | -                                                                                                                                        | 3.700961246 | 0.822585797  | -1.613069054 | 1.265726346  |
| ENSORLG00000011596 | si.ch211-15b1 | si.ch211-15b10.6 [Source:ZFINAcc:ZDB-GENE-160728-113]                                                                                    | 4.397113825 | 2.507416281  | -0.665860106 | 1.224322578  |
| ENSORLG00000012064 | adm2a         | adrenomedullin 2a [Source:ZFINAcc:ZDB-GENE-041210-100]                                                                                   | 4.787241713 | 0.478456522  | -2.392009142 | 1.917261005  |
| ENSORLG00000012990 | lam98b        | family with sequence similarity 98, member B [Source:ZFINAcc:ZDB-GENE-061201-63]                                                         | 3.186615274 | 0.489956112  | -1.032007342 | 1.6651373    |
| ENSORLG00000005003 | -             | -                                                                                                                                        | 4.576795554 | 1.123360333  | -1.674677277 | 1.779248659  |
| ENSORLG00000013198 | -             | -                                                                                                                                        | 3.482207158 | 1.917921352  | -0.152563659 | 1.717350077  |
| ENSORLG00000017322 | trmem30aa     | transmembrane protein 30Aa [Source:ZFINAcc:ZDB-GENE-040704-26]                                                                           | 3.425052407 | 1.410658572  | -0.402376474 | 1.612502329  |
| ENSORLG00000016859 | thbs1         | Oryzias latipes thrombospondin 1 (thbs1), mRNA [Source:RefSeq mRNA,Acc:NM_001163128]                                                     | 3.817910056 | 1.830718937  | -2.128031333 | -0.140354723 |
| ENSORLG00000016427 | ph2           | punctophilin 2 [Source:ZFINAcc:ZDB-GENE-030131-9848]                                                                                     | 7.687678169 | 2.611984413  | -2.669024331 | 2.406838314  |
| ENSORLG00000007377 | smad1         | SMAD family member 1 [Source:ZFINAcc:ZDB-GENE-991119-8]                                                                                  | 3.45163959  | 1.657903894  | 0.367910473  | 2.162130653  |
| ENSORLG00000008649 | ggt1b         | gamma-glutamyltransferase 1b [Source:ZFINAcc:ZDB-GENE-110408-13]                                                                         | 4.234109248 | -3.042080343 | -3.56581957  | 3.710855364  |
| ENSORLG00000003556 | c3h4          | profh 3-hydroxylase family member 4 (non-enzymatic) [Source:ZFINAcc:ZDB-GENE-030131-1599]                                                | 3.297250063 | 2.018019712  | 0.72060133   | 2.00031647   |
| ENSORLG00000000788 | HPGD          | 15-hydroxyprostaglandin dehydrogenase (NAD+)                                                                                             | 4.896197432 | 1.473062255  | -1.603152264 | 1.823467592  |
| ENSORLG00000005397 | anapc2b       | anapc2b [Source:NCBI gene,Acc:101154790]                                                                                                 | 5.365893889 | 2.973205133  | -2.871211048 | 1.389063393  |
| ENSORLG00000008911 | -             | -                                                                                                                                        | 6.719603869 | 2.872463394  | -2.811461392 | 1.065472028  |
| ENSORLG00000003354 | NRCAM (1 of   | neuronal cell adhesion molecule [Source:HGNC Symbol,Acc:HGNC:7944]                                                                       | 3.986307765 | 2.245339717  | 0.523379442  | 2.264832766  |
| ENSORLG00000013880 | alka2a        | ALK and LTK ligand 2a [Source:ZFINAcc:ZDB-GENE-100922-116]                                                                               | 15.6354608  | 12.83678612  | -0.807980003 | 1.991162527  |
| ENSORLG00000014792 | fbx2          | F-box 2 [Source:HGNC Symbol,Acc:HGNC:11871]                                                                                              | 4.784190135 | 1.508059893  | -2.229912985 | 1.062785125  |
| ENSORLG00000018533 | scs2          | schistosin [Source:ZFINAcc:ZDB-GENE-110411-139]                                                                                          | 4.819715961 | 2.907182015  | -1.665897656 | 0.247133556  |
| ENSORLG00000008715 | sox1b         | suppressor of cytokine signaling 1 [Source:NCBI gene,Acc:101165453]                                                                      | 4.462041274 | 1.119814454  | -2.264672762 | 1.078039073  |
| ENSORLG00000010712 | DDA1          | dimethylarginine dimethylaminohydrolase 1 [Source:NCBI gene,Acc:101157285]                                                               | 4.624960097 | 1.79702084   | -0.961539839 | 1.866885738  |
| ENSORLG00000015318 | lum           | lumican [Source:ZFINAcc:ZDB-GENE-141625-24]                                                                                              | 6.278180077 | 2.831896433  | -2.104388678 | 1.292376888  |
| ENSORLG00000016925 | PKFB2         | 6-phosphofructo-2-kinase/fructose-2,6-bisphosphatase 2 [Source:HGNC Symbol,Acc:HGNC:8873]                                                | 3.656596777 | 0.671474566  | -0.724049525 | 2.26298948   |
| ENSORLG00000016484 | tyr4          | EYA transcriptional coactivator and phosphatase 4 [Source:ZFINAcc:ZDB-GENE-050327-83]                                                    | 4.291274365 | 0.940991111  | -1.621888609 | 0.731880166  |
| ENSORLG00000011281 | fat2          | FAT atypical cadherin 2 [Source:ZFINAcc:ZDB-GENE-111031-11]                                                                              | 4.299062629 | 0.968102046  | -1.304509748 | 2.026937386  |
| ENSORLG00000007877 | snx10c        | sorting nexin 10 [Source:NCBI gene,Acc:101158699]                                                                                        | 4.700509215 | 2.023085117  | -1.835471086 | 0.842435258  |
| ENSORLG00000010570 | si.ch73-62121 | si.ch73-62121.1 [Source:ZFINAcc:ZDB-GENE-120215-179]                                                                                     | 4.00024254  | 2.037758056  | 0.891220494  | 2.854189622  |
| ENSORLG00000005340 | ddc           | Oryzias latipes dopa decarboxylase (ddc), mRNA [Source:RefSeq mRNA,Acc:NM_001160445]                                                     | 5.779664513 | -0.15490273  | -4.23066359  | 1.696986321  |
| ENSORLG00000001827 | ocs49         | protoporphyrin oxidase subunit 49 [Source:ZFINAcc:ZDB-GENE-060927-11]                                                                    | 4.627432368 | 0.418120989  | -2.344653303 | 1.86514347   |
| ENSORLG00000011507 | inpp5f        | inositol polyphosphatase-5-phosphatase 1 [Source:ZFINAcc:ZDB-GENE-051127-29]                                                             | 3.145767404 | 1.226596     | 0.964381234  | 2.884037391  |
| ENSORLG00000015075 | -             | -                                                                                                                                        | 5.378476441 | 1.742411169  | -0.786253828 | 2.80846662   |
| ENSORLG00000010457 | lmo1a         | homeobox protein 1 [Source:NCBI gene,Acc:101161630]                                                                                      | 4.527131232 | 1.775085488  | -2.86140302  | -0.108873007 |
| ENSORLG00000012924 | sh3dgr        | SH3 domain-binding glutamic acid-rich-like protein [Source:NCBI gene,Acc:101175670]                                                      | 3.240630776 | 2.079633371  | -0.208382201 | 0.953101383  |
| ENSORLG00000005230 | gb            | Hemoglobin subunit beta [Source:NCBI gene,Acc:101158593]                                                                                 | 9.901583752 | 0.038179361  | -23.29657044 | -13.43317725 |
| ENSORLG00000006046 | HGFAC         | HGF activator [Source:HGNC Symbol,Acc:HGNC:4894]                                                                                         | 5.029161546 | 1.754829518  | -1.13369071  | 2.141124381  |
| ENSORLG00000002540 | toil          | toil-like receptor 7 [Source:NCBI gene,Acc:101162959]                                                                                    | 3.296446396 | 1.429185735  | -0.507423574 | 1.360320956  |
| ENSORLG00000007219 | EPH3B         | EPH receptor B3 [Source:HGNC Symbol,Acc:HGNC:3394]                                                                                       | 4.226826807 | 2.860424153  | -1.39418376  | 1.89418376   |
| ENSORLG0000001090  | wab70b        | switching B cell complex subunit SWAP70B [Source:ZFINAcc:ZDB-GENE-030131-3987]                                                           | 4.341836844 | 1.940980432  | -1.102328416 | 1.299012312  |
| ENSORLG00000015535 | -             | ILM and secreted cell antigen-like-containing domain protein 1 [Source:NCBI gene,Acc:101164852]                                          | 4.191133451 | 2.264158691  | -0.54465782  | 1.381993757  |
| ENSORLG00000012219 | -             | -                                                                                                                                        | 3.967193749 | 1.721353777  | -0.938976888 | 1.309348683  |
| ENSORLG00000017799 | -             | actn, alpha cardiac [Source:NCBI gene,Acc:101161456]                                                                                     | 4.226826807 | 2.860424153  | -1.139418376 | 1.89418376   |
| ENSORLG00000013941 | -             | -                                                                                                                                        | 3.071791759 | 1.60290228   | -1.38989743  | 0.079413123  |
| ENSORLG00000011743 | em3           | echinoderm microtubule associated protein like 3 [Source:ZFINAcc:ZDB-GENE-110304-3]                                                      | 3.141636564 | 1.105611721  | -2.116289706 | -0.07971943  |
| ENSORLG00000013964 | -             | -                                                                                                                                        | 4.742152368 | 1.553118502  | -2.251962618 | 0.937555878  |
| ENSORLG00000002584 | unm_sar80b    | un-named sar80b [Source:ZFINAcc:ZDB-GENE-120727-211]                                                                                     | 3.430973437 | 1.468511922  | -0.375420629 | 1.587525372  |
| ENSORLG00000008800 | chrna2b       | cholinergic receptor, nicotinic, alpha 2b (neuronal) [Source:ZFINAcc:ZDB-GENE-041001-99]                                                 | 3.077194133 | -0.038635355 | -3.404194272 | -0.287879804 |
| ENSORLG00000012186 | -             | uncharacterized LOC101163284 [Source:NCBI gene,Acc:101163284]                                                                            | 3.375786221 | 2.791922346  | -0.878067074 | -0.293718205 |
| ENSORLG00000014541 | KUN           | transcription factor AP-1 [Source:NCBI gene,Acc:101174822]                                                                               | 3.238377869 | 0.598304101  | -0.881194401 | 1.759364176  |
| ENSORLG00000014027 | pcd1          | pterin-4 alpha-carbinolamine dehydratase/dimenzation cofactor of hepatocyte nuclear factor 1 alpha [Source:ZFINAcc:ZDB-GENE-040426-1787] | 3.002144795 | 0.646526889  | -1.306057039 | 1.05001014   |
| ENSORLG00000015413 | pcf1b         | POF1B, actin binding protein [Source:ZFINAcc:ZDB-GENE-030131-4287]                                                                       | 3.276899153 | 0.027277187  | -2.220848439 | 1.02925823   |
| ENSORLG00000000363 | gpr171        | G protein-coupled receptor 171 [Source:ZFINAcc:ZDB-GENE-131121-339]                                                                      | 3.708529093 | 0.419028771  | -4.295796666 | -1.005812615 |
| ENSORLG00000018199 | ahr1b (1 of m | aryl hydrocarbon receptor 1b [Source:ZFINAcc:ZDB-GENE-050922-1]                                                                          | 4.967843459 | 4.543750077  | -0.800578027 | -0.376001689 |
| ENSORLG00000016107 | -             | -                                                                                                                                        | 6.457113982 | 3.427458818  | -3.023328756 | 0.006813743  |
| ENSORLG00000000900 | camk2b2       | calcium/calmodulin-dependent protein kinase (CaM kinase) II beta 2 [Source:ZFINAcc:ZDB-GENE-080312-34]                                   | 3.80777858  | 0.79833557   | -1.102412794 | 1.907537763  |
| ENSORLG00000005279 | trio6         | rho guanine nucleotide exchange factor b [Source:ZFINAcc:ZDB-GENE-030616-399]                                                            | 3.514273017 | 0.874661189  | -1.307741085 | 1.332356343  |
| ENSORLG00000003210 | -             | -                                                                                                                                        | 4.245782118 | 1.1529443    | -2.609514742 | 0.483808378  |
| ENSORLG00000006783 | psmb8a (1 of  | proteasome subunit beta 8A [Source:ZFINAcc:ZDB-GENE-990415-141]                                                                          | 5.630527576 | 1.44415249   | -1.608549485 | 2.578310647  |

|             |                    |                    |                                                                                                          |               |              |              |               |
|-------------|--------------------|--------------------|----------------------------------------------------------------------------------------------------------|---------------|--------------|--------------|---------------|
|             | ENSORLG0000004124  | APCDD1             | APC down-regulated 1 [Source:HGNC Symbol;Acc:HGNC:15718]                                                 | 3.003406766   | 1.916647796  | -2.606888656 | -1.519644704  |
|             | ENSORLG0000004814  | si:dkay-110c1      | si:dkay-110c1.10 [Source:ZFIN;Acc:ZDB-GENE-050208-429]                                                   | 7.093589594   | 3.187876542  | -3.65207662  | 0.254115179   |
|             | ENSORLG00000015972 | ephb1              | EPH receptor B1 [Source:ZFIN;Acc:ZDB-GENE-070912-219]                                                    | 4.688014566   | 3.107297587  | 0.959761416  | 2.540964297   |
|             | ENSORLG0000002885  | -                  | -                                                                                                        | 4.469037189   | 1.139342219  | -1.613538516 | 1.716640609   |
|             | ENSORLG0000001785  | P2RY4              | pyrimidinergic receptor P2Y4 [Source:HGNC Symbol;Acc:HGNC:8844]                                          | 5.258742324   | 2.15444879   | -1.815143859 | 1.289438264   |
|             | ENSORLG0000001284  | si:ch211-214f      | si:ch211-214f.1 [Source:ZFIN;Acc:ZDB-GENE-060526-100]                                                    | 3.536112616   | -0.895213993 | -1.796534482 | 2.63727781    |
|             | ENSORLG00000006529 | bnip6              | bone morphogenetic protein 6 [Source:ZFIN;Acc:ZDB-GENE-050306-49]                                        | 6.14979308    | 1.140250119  | -3.104242977 | 1.905732287   |
|             | ENSORLG00000017009 | hnt5ab             | family with sequence similarity 46, member Ab [Source:ZFIN;Acc:ZDB-GENE-071004-35]                       | 4.108515787   | 1.021768365  | -1.535802833 | 1.551428999   |
|             | ENSORLG00000009755 | -                  | -                                                                                                        | 4.896148744   | 2.514680108  | -0.962076776 | 1.419976055   |
|             | ENSORLG00000004036 | -                  | -                                                                                                        | 3.064767536   | 0.89790624   | -0.90386505  | 1.269280157   |
|             | ENSORLG00000000775 | -                  | myosin 11 [Source:NCBI;gene:Acc:101172658]                                                               | 5.258731679   | 1.276434448  | -2.633395087 | 1.349387605   |
|             | ENSORLG00000012106 | slc41a1            | solute carrier family 41 (magnesium transporter), member 1 [Source:ZFIN;Acc:ZDB-GENE-030131-4700]        | 4.294608153   | 0.610657378  | -1.187953699 | 2.496480657   |
|             | ENSORLG00000016850 | PRKCZ              | protein kinase C zeta [Source:HGNC Symbol;Acc:HGNC:9412]                                                 | 3.498225783   | 0.20032312   | -0.391938866 | 2.906453294   |
|             | ENSORLG00000008220 | ar-alpha           | Oxyrias latipes androgen receptor beta (ar-alpha) mRNA [Source:RefSeq mRNA;Acc:NM_001122911]             | 4.318650365   | 2.703748553  | -0.688855146 | 0.926531492   |
|             | ENSORLG00000016176 | -                  | -                                                                                                        | 4.638053581   | 1.545054985  | -1.821287324 | 1.272196297   |
|             | ENSORLG00000007487 | aatka              | apoptosis-associated tyrosine kinase 4 [Source:ZFIN;Acc:ZDB-GENE-100812-4]                               | 3.983576429   | 1.74639728   | -1.20899183  | 1.02875579    |
|             | ENSORLG00000006554 | alx4b              | ALX homeobox 4b [Source:ZFIN;Acc:ZDB-GENE-050208-140]                                                    | 15.7084424    | 12.17542792  | -4.387320218 | -0.853817851  |
|             | ENSORLG00000011441 | dock11             | dedicator of cytokinesis 11 [Source:ZFIN;Acc:ZDB-GENE-060503-196]                                        | 4.505987704   | 1.818028773  | -2.261772057 | 0.426671347   |
|             | ENSORLG00000015292 | pip4k2cb           | phosphatidylinositol 5-phosphate 4-kinase type-2 gamma [Source:NCBI;gene:Acc:101137218]                  | 4.052509911   | 0.546010901  | -0.967203085 | 2.53977904    |
|             | ENSORLG00000021309 | RF0045             | small nucleolar RNA SNORA73 family [Source:NCBI;gene:Acc:111947131]                                      | 4.466729743   | 2.260750366  | 0.790703772  | 2.997168413   |
|             | ENSORLG00000004371 | dic5a              | chloride intracellular channel 5a [Source:ZFIN;Acc:ZDB-GENE-041114-84]                                   | 5.76785201    | 1.565337096  | -2.269611922 | 1.933388177   |
|             | ENSORLG00000018204 | fos2               | fos-like antigen 2 [Source:ZFIN;Acc:ZDB-GENE-070209-164]                                                 | 5.375191582   | 1.33330999   | -1.978306692 | 2.064038315   |
|             | ENSORLG00000018163 | -                  | -                                                                                                        | 5.038138823   | 0.806782899  | -15.97261637 | -11.74109194  |
|             | ENSORLG00000015172 | mx1                | max interactor 1, dimerization protein [Source:ZFIN;Acc:ZDB-GENE-090415-151]                             | 3.791509547   | 1.400431251  | -0.80145146  | 1.590111678   |
|             | ENSORLG00000003939 | agp10b             | agapinon 10b [Source:ZFIN;Acc:ZDB-GENE-060503-57]                                                        | 4.018528542   | -0.342818939 | -1.53383841  | 2.877992819   |
|             | ENSORLG00000018046 | -                  | -                                                                                                        | 4.824365597   | 1.75987691   | -2.539567922 | 0.525405786   |
|             | ENSORLG00000009010 | ephb3a             | eph receptor B3a [Source:ZFIN;Acc:ZDB-GENE-990415-60]                                                    | 4.194918755   | 1.896223847  | -1.395513327 | 0.901666039   |
|             | ENSORLG00000015556 | znf703             | zinc finger protein 703 [Source:ZFIN;Acc:ZDB-GENE-010717-11]                                             | 3.360244029   | 0.969240801  | -2.253604334 | 0.137883412   |
|             | ENSORLG00000017460 | cers1              | ceramide synthase 1 [Source:ZFIN;Acc:ZDB-GENE-050208-406]                                                | 5.759735596   | 2.440545148  | -2.809978756 | 0.509702164   |
|             | ENSORLG00000015711 | bvm                | basic, immunoglobulin-like variable motif containing [Source:ZFIN;Acc:ZDB-GENE-010822-3]                 | 3.056878136   | 0.16746299   | -0.346138399 | 2.543762011   |
|             | ENSORLG00000012425 | ptpn6              | protein tyrosine phosphatase, non-receptor type 6 [Source:ZFIN;Acc:ZDB-GENE-030131-7513]                 | 3.669098807   | 2.019274319  | -1.700242317 | -0.049933062  |
|             | ENSORLG00000014511 | si:dkay-23920      | si:dkay-23920.4 [Source:ZFIN;Acc:ZDB-GENE-030131-2644]                                                   | 3.198959033   | 1.093711792  | -0.891360787 | 1.214370321   |
|             | ENSORLG00000008635 | abcd2              | ATP-binding cassette, sub-family D (ALD), member 2 [Source:ZFIN;Acc:ZDB-GENE-050517-28]                  | 3.252532775   | 1.955746036  | -0.209986831 | 1.087285217   |
|             | ENSORLG00000013019 | spred1             | sprouty-related, EPH1 domain containing 1 [Source:ZFIN;Acc:ZDB-GENE-040426-2338]                         | 6.767333485   | 4.023415674  | -1.099995616 | 1.64441146    |
|             | ENSORLG00000003734 | NFX (1 of many)    | nuclear factor X [Source:HGNC Symbol;Acc:HGNC:9412]                                                      | 3.254288249   | 1.119051718  | -2.172890014 | -0.037808167  |
|             | ENSORLG00000002797 | csf2               | csf1 skipped related transcription factor 2 [Source:NCBI;gene:Acc:101184502]                             | 3.139956572   | 2.33445238   | -1.511782768 | -0.704787735  |
|             | ENSORLG00000012350 | -                  | ermansyn-2 like [Source:NCBI;gene:Acc:101174464]                                                         | 4.401082028   | 1.857398939  | -4.207352604 | -1.663813792  |
|             | ENSORLG00000000293 | si:ch211-255f      | si:ch211-255f.3 [Source:ZFIN;Acc:ZDB-GENE-141216-113]                                                    | 6.381571423   | 2.774737609  | -4.235499447 | -0.628119891  |
| HmtO VS WTO | 88                 | ENSORLG00000006423 | -                                                                                                        | 2.339253791   | 3.364477799  | 1.084686444  | 0.059957774   |
|             | ENSORLG00000006578 | slak               | slakeletin [Source:ZFIN;Acc:ZDB-GENE-040426-1506]                                                        | 2.807782923   | 4.21202847   | 0.919718811  | 0.42434592    |
|             | ENSORLG00000003484 | slal1              | Src-like-adapter 1 [Source:ZFIN;Acc:ZDB-GENE-050904-3]                                                   | 1.151479854   | 3.165758316  | 1.910981484  | -0.102812619  |
|             | ENSORLG00000012567 | RF00284            | small nucleolar RNA SNORD74 [Source:NCBI;gene:Acc:111947413]                                             | -12.63301337  | 5.431997698  | 13.32769438  | -4.736825993  |
|             | ENSORLG00000006720 | si:ch211-241f      | si:ch211-241f.3 [Source:ZFIN;Acc:ZDB-GENE-131127-562]                                                    | 1.600537159   | 4.200580927  | 2.285074952  | -0.0314481725 |
|             | ENSORLG00000005961 | -                  | -                                                                                                        | 0.882912403   | 4.839535112  | 1.619307058  | -2.336830765  |
|             | ENSORLG00000003632 | -                  | -                                                                                                        | 1.134556428   | 3.530942334  | 1.32367267   | -1.072228339  |
|             | ENSORLG00000005824 | gnrh3              | Oxyrias latipes prepro-gonadotropin-releasing hormone (gnrh3) mRNA [Source:RefSeq mRNA;Acc:NM_001104672] | -16.426586696 | 3.298120449  | 10.25296104  | -9.471256466  |
|             | ENSORLG00000016162 | -                  | -                                                                                                        | 1.982437411   | 8.524040977  | 1.006611077  | -5.534510758  |
|             | ENSORLG00000017610 | cx34.5             | connexin 34.5 [Source:RefSeq mRNA;Acc:NM_001104810]                                                      | 1.823973426   | 3.942022338  | -5.896033504 | -0.015410833  |
|             | ENSORLG00000028284 | -                  | -                                                                                                        | 0             | 16.18785857  | 12.81087653  | -2.556708491  |
|             | ENSORLG00000021420 | RF00612            | small nucleolar RNA SNORD75 [Source:NCBI;gene:Acc:111947416]                                             | -11.31474194  | 5.013521263  | 14.93990417  | -1.388669234  |
|             | ENSORLG00000004107 | -                  | -                                                                                                        | 14.80376887   | 16.29475678  | 0.566388486  | -0.924138127  |
|             | ENSORLG00000017093 | zpc153157          | zpc153157 [Source:ZFIN;Acc:ZDB-GENE-060825-224]                                                          | 2.276547709   | 3.497540254  | -0.831083638 | -2.051597365  |
|             | ENSORLG00000018146 | -                  | -                                                                                                        | 4.267791873   | 4.532198469  | 1.428614169  | 1.164730348   |
|             | ENSORLG00000013850 | -                  | -                                                                                                        | 16.5731675    | 10.2018165   | -6.572503805 | -0.72531816   |
|             | ENSORLG00000002134 | -                  | -                                                                                                        | 4.156195454   | 6.69899843   | -0.080642314 | -1.623964693  |
|             | ENSORLG00000007211 | adma               | adrenomedullin [Source:NCBI;gene:Acc:100125438]                                                          | 2.917671499   | 3.067030431  | -0.214278438 | -0.363159267  |
|             | ENSORLG00000011567 | -                  | -                                                                                                        | -13.88430321  | 3.237271738  | 14.30097484  | -2.810138374  |
|             | ENSORLG00000000513 | -                  | -                                                                                                        | -10.71312012  | 5.476364924  | 11.6290287   | -4.559967072  |
|             | ENSORLG00000007814 | -                  | -                                                                                                        | -5.209746021  | 3.915249162  | 0.726676626  | -8.389694446  |
|             | ENSORLG00000017009 | anxa2a             | annexin A2, A [Source:NCBI;gene:Acc:101167451]                                                           | 1.515497881   | 3.850292739  | 1.72972288   | 1.025458522   |
|             | ENSORLG00000015290 | -                  | -                                                                                                        | 0.605421938   | 4.027117928  | 1.942702356  | -1.478570975  |
|             | ENSORLG00000012826 | -                  | -                                                                                                        | 1.668064006   | 4.611643119  | 2.756689853  | -0.187407611  |
|             | ENSORLG00000018221 | -                  | -                                                                                                        | -0.046313926  | 3.547689863  | 3.014698204  | -0.369901886  |
|             | ENSORLG00000008441 | -                  | -                                                                                                        | 1.752782161   | 3.615325987  | 0.440701479  | -1.455940564  |
|             | ENSORLG00000015010 | slc27a1b           | solute carrier family 27 (fatty acid transporter), member 1b [Source:ZFIN;Acc:ZDB-GENE-061013-872]       | 3.527512955   | 8.817929831  | -1.392314959 | -6.682241896  |
|             | ENSORLG00000006890 | AIF1               | apoptosis-inducing factor 1 [Source:NCBI;gene:Acc:101175592]                                             | -13.56561502  | 3.878838639  | 14.89041582  | -2.553547477  |
|             | ENSORLG00000005918 | -                  | -                                                                                                        | -4.792054685  | 3.827115133  | 0.00076633   | -8.614513691  |
|             | ENSORLG00000018328 | -                  | -                                                                                                        | 1.781770034   | 3.850292739  | 1.17292947   | -0.896893171  |
|             | ENSORLG00000026888 | -                  | -                                                                                                        | -8.881788959  | 7.296217008  | 14.20519913  | -1.912302004  |
|             | ENSORLG00000009126 | erb2               | Oxyrias latipes estrogen-related receptor beta type 2 (erb2) mRNA [Source:RefSeq mRNA;Acc:NM_001163091]  | 1.50209701    | 8.208995727  | 3.369412677  | -3.336999572  |
|             | ENSORLG00000000257 | -                  | -                                                                                                        | 8.817143358   | 15.99839042  | 4.614602785  | -2.566194242  |
|             | ENSORLG00000001199 | -                  | -                                                                                                        | 8.490048599   | 15.69327704  | 5.666318942  | -1.536436843  |
|             | ENSORLG00000004277 | hsd17b3            | hydroxysteroid (17-beta) dehydrogenase 3 [Source:ZFIN;Acc:ZDB-GENE-040426-1339]                          | -2.760197371  | 3.189194363  | 4.638943094  | -1.319505334  |
|             | ENSORLG00000000836 | -                  | -                                                                                                        | 0             | 17.9957079   | 8.776357079  | -8.776357079  |
|             | ENSORLG00000013321 | -                  | -                                                                                                        | -0.596171251  | 0            | 3.285681104  | -4.403333511  |
|             | ENSORLG00000017090 | -                  | -                                                                                                        | 10.06323355   | 20.01925029  | 1.857104209  | -8.108456862  |

|            |                    |                   |                                                                                                     |               |              |              |              |
|------------|--------------------|-------------------|-----------------------------------------------------------------------------------------------------|---------------|--------------|--------------|--------------|
|            | ENSRORG0000011883  | ephb6             | eph receptor B6 [Source:ZFIN;Acc:ZDB-GENE-100922-51]                                                | 0.734474051   | 7.447299403  | 2.427313851  | -4.285022511 |
|            | ENSRIG00000004187  | -                 | -                                                                                                   | 2.364372005   | 6.710977083  | -4.846034603 | -9.192147038 |
|            | ENSRIG00000007108  | -                 | -                                                                                                   | -12.83807329  | 3.901003792  | 15.45518368  | -1.283402172 |
|            | ENSRIG00000007005  | -                 | -                                                                                                   | 3.390768654   | 4.548142006  | 2.039939115  | 0.883051472  |
|            | ENSRIG00000005715  | olfg6             | extracellular calcium-sensing receptor-like [Source:NCBI gene:Acc:101174763]                        | -10.72021005  | 5.261451258  | 0            | -15.98166828 |
|            | ENSRIG00000004611  | -                 | -                                                                                                   | 2.927132005   | 5.033639836  | -1.584207646 | -3.690231849 |
|            | ENSRIG00000021868  | RF00271           | coenzyme Q-binding protein COQ10 homolog, mitochondrial [Source:NCBI gene:Acc:101164311]            | -10.16093027  | 5.500183451  | 15.5619472   | -0.098031067 |
|            | ENSRIG00000011040  | -                 | -                                                                                                   | 13.7865853    | 4.528957062  | 13.2458484   | -2.136494868 |
|            | ENSRIG00000011199  | -                 | -                                                                                                   | 2.484489351   | 3.455177903  | 0.098410547  | -0.070233698 |
|            | ENSRIG00000006007  | sou5              | heme-binding protein sou5 [Source:ZFIN;Acc:ZDB-GENE-110718-2]                                       | -4.101978636  | 3.324966349  | 2.293820203  | -5.187078109 |
|            | ENSRIG00000016133  | -                 | -                                                                                                   | 5.17964243    | 8.784710849  | 1.377335417  | -2.27273393  |
|            | ENSRIG00000009963  | -                 | -                                                                                                   | -14.66705331  | 3.204260399  | 0            | -17.87132015 |
|            | ENSRIG000000021451 | RF00070           | small nucleolar RNA SNORD29 [Source:NCBI gene:Acc:111946360]                                        | -12.31474184  | 3.305502715  | 15.29735838  | -0.322396762 |
|            | ENSRIG00000001178  | -                 | -                                                                                                   | 1.327483849   | 6.326796471  | 2.621065209  | -2.377758503 |
|            | ENSRIG00000001825  | -                 | -                                                                                                   | -11.05257484  | 5.404364915  | 10.65068379  | -5.805766305 |
|            | ENSRIG00000009255  | crot              | carbamate O-acetyltransferase [Source:NCBI gene:Acc:101171357]                                      | 0.658501109   | 3.808104507  | 0.807021458  | -2.342097223 |
|            | ENSRIG00000006058  | C3orf80           | chromosome 3 open reading frame 80 [Source:HGNC Symbol;Acc:HGNC:40048]                              | -1.310427329  | 3.159226141  | 0.736602615  | -1.111170761 |
|            | ENSRIG00000015788  | -                 | -                                                                                                   | -11.69532835  | 5.590123959  | 14.26333743  | -3.021625097 |
|            | ENSRIG00000000057  | -                 | -                                                                                                   | 0             | 15.92564229  | 10.42658878  | -5.49894774  |
|            | ENSRIG00000009496  | -                 | -                                                                                                   | 0.505785748   | 3.502402876  | -0.318088707 | -3.314230875 |
|            | ENSRIG00000021468  | RF00069           | small nucleolar RNA SNORD24 [Source:NCBI gene:Acc:111947418]                                        | 1.497411064   | 7.287775155  | 3.10551255   | -2.884370103 |
|            | ENSRIG00000011788  | -                 | -                                                                                                   | -12.88998421  | 3.088356655  | 13.03343677  | -2.944238677 |
|            | ENSRIG00000016089  | -                 | -                                                                                                   | -1.401980383  | 4.95310516   | 2.318807778  | -4.018807186 |
|            | ENSRIG00000021554  | RF00099           | small nucleolar RNA SNORD22 [Source:NCBI gene:Acc:111946360]                                        | -14.19580257  | 15.6773535   | 2.20078903   | 0.719705048  |
|            | ENSRIG00000009899  | -                 | -                                                                                                   | 18.21778804   | 6.333207458  | 10.13615805  | -12.41243438 |
|            | ENSRIG00000017016  | -                 | -                                                                                                   | -0.085892819  | 5.844205651  | 4.899790141  | -0.619820043 |
|            | ENSRIG00000021285  | RF00591           | small nucleolar RNA snR60/Z15Z30/Z193/17 [Source:NCBI gene:Acc:111947414]                           | 0.724028756   | 3.334028655  | 2.556705289  | -0.052810403 |
|            | ENSRIG00000017074  | -                 | -                                                                                                   | 0             | 16.88620778  | 12.25450606  | -4.431230125 |
|            | ENSRIG00000008540  | -                 | -                                                                                                   | -13.09797943  | 3.454230434  | 0            | -16.55221593 |
|            | ENSRIG00000000253  | -                 | -                                                                                                   | -8.66895877   | 7.049034663  | 13.86279328  | -1.854889197 |
|            | ENSRIG00000003997  | -                 | -                                                                                                   | -12.4455736   | 3.420248027  | 14.0549513   | -3.910786004 |
|            | ENSRIG00000006867  | si ch211-240n     | chemokine-like receptor 1 [Source:ZFIN;Acc:ZDB-GENE-060526-126]                                     | 1.287442533   | 3.672975688  | 2.075919146  | -0.309129433 |
|            | ENSRIG00000014327  | -                 | -                                                                                                   | -1.48865657   | 3.6442344    | 1.656622447  | -3.475792401 |
|            | ENSRIG00000005912  | cd81b             | CD81 molecule b [Source:ZFIN;Acc:ZDB-GENE-040808-52]                                                | 2.847521327   | 3.911543291  | 1.617465387  | 0.653927148  |
|            | ENSRIG00000012376  | ptpip1b           | proline-senase-threonine phosphatase interacting protein 1b [Source:ZFIN;Acc:ZDB-GENE-051127-25]    | 1.960917848   | 3.306661368  | -0.137307322 | -1.476564358 |
|            | ENSRIG00000005986  | -                 | -                                                                                                   | 2.029198587   | 3.012972582  | 0.778548167  | -0.204740139 |
|            | ENSRIG00000013883  | -                 | -                                                                                                   | 3.397486184   | 4.51667148   | 3.218804895  | -0.06465404  |
|            | ENSRIG00000011796  | -                 | -                                                                                                   | 3.88483922    | 3.91890428   | 2.678974832  | 1.068854115  |
|            | ENSRIG00000007086  | myofl             | myofelin like [Source:ZFIN;Acc:ZDB-GENE-111116-2]                                                   | 0.842748128   | 3.420538474  | 2.178652336  | -0.650854041 |
|            | ENSRIG00000021274  | RF00281           | small nucleolar RNA SNORD47 [Source:NCBI gene:Acc:111947412]                                        | 1.757039582   | 3.026189407  | 2.035193712  | 0.766527722  |
|            | ENSRIG00000012514  | -                 | -                                                                                                   | -0.003592862  | 5.713062113  | 2.086110182  | -6.30062035  |
|            | ENSRIG00000000473  | -                 | -                                                                                                   | 2.208203976   | 3.306163836  | -0.836257819 | -1.933732668 |
|            | ENSRIG00000017085  | -                 | -                                                                                                   | 0             | 17.5205118   | 13.67108214  | -3.848957462 |
|            | ENSRIG00000011753  | abi3tpa           | ABI family, member 3 (NESH) binding protein a [Source:ZFIN;Acc:ZDB-GENE-070912-325]                 | -0.478522541  | 3.30292313   | 0.0628805    | -3.718076732 |
|            | ENSRIG00000001170  | -                 | -                                                                                                   | -9.947373942  | 5.693097453  | 13.33602251  | -2.30396196  |
|            | ENSRIG00000002029  | -                 | -                                                                                                   | -3.383335714  | 7.556877654  | 6.96585559   | -3.973893933 |
|            | ENSRIG00000006289  | -                 | -                                                                                                   | -11.01472351  | 4.792702363  | 15.18189415  | -0.684538278 |
|            | ENSRIG00000007250  | -                 | -                                                                                                   | -11.55487659  | 4.290705652  | 0            | -15.8455832  |
|            | ENSRIG00000011776  | -                 | -                                                                                                   | 2.371720089   | 3.273248337  | 2.49623806   | 1.595196422  |
|            | ENSRIG00000011891  | qhvl.4            | immunoglobulin heavy variable 1-4 [Source:ZFIN;Acc:ZDB-GENE-040514-1]                               | 2.703955716   | 4.820706558  | 2.158363525  | 0.042097762  |
| Hmt VS WTT | 718                | ENSRIG00000008213 | -                                                                                                   | -2.252000578  | 0.065087827  | 3.186931598  | 0.880328174  |
|            | ENSRIG00000010936  | -                 | -                                                                                                   | -1.844315882  | 0.339103369  | 3.564994518  | 1.30260104   |
|            | ENSRIG00000016363  | isca              | iron-sulfur cluster assembly 2 [Source:ZFIN;Acc:ZDB-GENE-131121-486]                                | -2.178971946  | 0.455792664  | 3.616825719  | 0.982546081  |
|            | ENSRIG00000005255  | -                 | -                                                                                                   | -1.65188544   | 2.058613313  | 5.968977357  | 2.257962112  |
|            | ENSRIG00000003255  | YAF2 (1 of many)  | YY1 associated factor 2 [Source:HGNC Symbol;Acc:HGNC:17363]                                         | -2.059009946  | 0.589514105  | 3.644945087  | 0.996095988  |
|            | ENSRIG00000017153  | -                 | -                                                                                                   | -11.435039927 | 3.540012039  | 17.28616339  | 2.311605328  |
|            | ENSRIG00000011235  | nchp2             | nuclear cap binding protein subunit 2 [Source:ZFIN;Acc:ZDB-GENE-020419-31]                          | -1.244361204  | 1.367364509  | 3.792686964  | 1.181446269  |
|            | ENSRIG000000009861 | se26a             | seizure related 6 homolog a [Source:ZFIN;Acc:ZDB-GENE-030131-8208]                                  | -5.11596497   | -0.765236823 | 4.934839922  | 0.584966153  |
|            | ENSRIG00000016956  | dnajc17           | DnaJ heat shock protein family (Hsp40) member C17 [Source:NCBI gene:Acc:101171293]                  | -3.877991568  | -0.331539898 | 3.714203628  | 0.168238788  |
|            | ENSRIG00000016990  | psma8             | proteasome subunit alpha 8 [Source:ZFIN;Acc:ZDB-GENE-040426-2194]                                   | -2.114369214  | 1.495189529  | 4.363165164  | 0.754091155  |
|            | ENSRIG00000003731  | PRELID3B          | PREL domain containing protein 3B [Source:NCBI gene:Acc:101164398]                                  | -0.542028695  | 0.223444128  | 3.157409992  | 2.392422125  |
|            | ENSRIG00000009647  | ef1ad             | eukaryotic translation initiation factor 1A domain containing [Source:NCBI gene:Acc:101161651]      | -1.941506539  | -0.140545213 | 3.541356124  | 1.740879704  |
|            | ENSRIG00000007002  | -                 | -                                                                                                   | -17.53162735  | 1.9219937    | 18.51743395  | -0.935698988 |
|            | ENSRIG00000008052  | nx2               | nuclear transport factor 2-like export factor 2 [Source:ZFIN;Acc:ZDB-GENE-050521-1]                 | -1.34393565   | 0.820084946  | 4.213913931  | 2.05037829   |
|            | ENSRIG00000008081  | -                 | -                                                                                                   | -11.01472351  | 4.792702363  | 15.18189415  | -0.684538278 |
|            | ENSRIG00000005534  | cabpnp1           | histone H2A-like [Source:NCBI gene:Acc:101161532]                                                   | -5.440375745  | -0.669169785 | 4.255132051  | -0.515588247 |
|            | ENSRIG00000016378  | -                 | -                                                                                                   | 2.57342498    | -0.922419121 | 3.81459064   | 2.164076886  |
|            | ENSRIG0000001781   | pdn5              | prelidin 5 [Source:ZFIN;Acc:ZDB-GENE-030131-8858]                                                   | -2.715752878  | 0.533672047  | 3.715577754  | 0.466837748  |
|            | ENSRIG00000004537  | snm15             | small integral membrane protein 15 [Source:NCBI gene:Acc:101165811]                                 | -1.671259115  | 0.912621825  | 4.77280319   | 2.189284369  |
|            | ENSRIG00000007945  | uba3              | ubiquitin-like modifier activating enzyme 3 [Source:ZFIN;Acc:ZDB-GENE-040426-2825]                  | -2.344837277  | 0.238734151  | 4.226612838  | 1.643526285  |
|            | ENSRIG00000015891  | -                 | -                                                                                                   | -2.498273992  | -0.230746187 | 3.202751559  | 0.935754589  |
|            | ENSRIG00000007042  | sm6               | LSM6 homolog, U6 small nuclear RNA and mRNA degradation associated [Source:NCBI gene:Acc:101156227] | -20.62584674  | 2.613784967  | 22.32961011  | -0.909531468 |
|            | ENSRIG00000001720  | cln6a             | CLN6, transmembrane ER protein [Source:NCBI gene:Acc:101166858]                                     | -2.152068997  | -0.624439874 | 3.981697455  | 2.454551927  |
|            | ENSRIG00000018097  | -                 | -                                                                                                   | -2.620454341  | 0.367721153  | 5.732362009  | 2.744671555  |
|            | ENSRIG00000013883  | tmem18            | transmembrane protein 18 [Source:NCBI gene:Acc:101158989]                                           | -4.419316808  | 1.194346852  | 4.564497672  | -1.048680746 |
|            | ENSRIG00000009116  | naa50             | (Naa)N-acetyltransferase 50, NADc catalytic subunit [Source:NCBI gene:Acc:101162486]                | -2.749120441  | 1.413171693  | 4.797831522  | 0.636024338  |
|            | ENSRIG00000002783  | polr2k            | RNA polymerase II subunit K [Source:NCBI gene:Acc:101167378]                                        | -4.641690103  | 1.931506944  | 6.088748836  | -0.483964168 |
|            | ENSRIG00000021758  | -                 | -                                                                                                   | -13.30972502  | 2.034765866  | 16.30311503  | 0.959115159  |
|            | ENSRIG00000007998  | kti12             | KTI12 chromatin associated homolog [Source:ZFIN;Acc:ZDB-GENE-060825-174]                            | -4.674204947  | 1.132987684  | 4.575901883  | -1.230810949 |
|            | ENSRIG00000008782  | nek7              | NIMA-related kinase 7 [Source:ZFIN;Acc:ZDB-GENE-040801-136]                                         | -1.034549042  | 1.401464425  | 4.336787016  | 1.901258167  |

|                     |                |                                                                                                      |              |              |             |              |
|---------------------|----------------|------------------------------------------------------------------------------------------------------|--------------|--------------|-------------|--------------|
| ENSRORG00000021777  | -              | -                                                                                                    | 0.455192128  | 2.48858009   | 3.144325218 | 1.111420733  |
| ENSRORG00000016615  | snrpf          | small nuclear ribonucleoprotein polypeptide F [Source:NCBI gene:Acc:101170198]                       | -0.913066531 | 0.409756075  | 3.01701101  | 1.69467333   |
| ENSRORG0000007610   | -              | -                                                                                                    | 2.600787674  | 4.932793455  | 3.640198149 | 1.308669937  |
| ENSRORG0000007818   | tmem192        | transmembrane protein 192 [Source:ZFIN;Acc:ZDB-GENE-040276-2254]                                     | -3.541113791 | 0.428973258  | 3.307314489 | -0.66227493  |
| ENSRORG00000015872  | kif15          | kinesin family member 15 [Source:ZFIN;Acc:ZDB-GENE-050622-16]                                        | -0.764495819 | 0.742129926  | 3.566417038 | 2.060276345  |
| ENSRORG00000003763  | stk16          | serine/threonine kinase 16 [Source:ZFIN;Acc:ZDB-GENE-050417-102]                                     | 0.042364464  | 0.899134842  | 3.007566687 | 2.151281157  |
| ENSRORG00000015935  | chmp3          | charged multivesicular body protein 3 [Source:NCBI gene:Acc:101158859]                               | -2.223464991 | 1.917266231  | 6.475500359 | 2.335253638  |
| ENSRORG00000006153  | si:ch211-2759  | chromosome 9 C12orf85 homolog [Source:NCBI gene:Acc:101162596]                                       | -4.077542189 | 1.084750346  | 4.874800637 | -0.287006496 |
| ENSRORG00000011747  | -              | -                                                                                                    | -5.439597852 | -0.432828254 | 5.045273641 | 0.038979889  |
| ENSRORG00000007033  | surf2          | surfactant 2 [Source:NCBI gene:Acc:101158543]                                                        | -4.198013135 | 1.611241348  | 3.671160386 | -2.135617958 |
| ENSRORG00000008016  | -              | -                                                                                                    | -2.592166815 | 0.728319887  | 3.290437057 | -0.029564502 |
| ENSRORG00000001314  | si:dkey-106g2  | UPF076 protein C1494.01-like [Source:NCBI gene:Acc:101162596]                                        | 0.421119165  | 1.260597935  | 3.613172042 | 2.77417788   |
| ENSRORG00000011049  | mbd4           | methyl-CpG binding domain protein 4 [Source:ZFIN;Acc:ZDB-GENE-040213-1]                              | -2.734184684 | -0.124463248 | 4.256667246 | 1.647430973  |
| ENSRORG00000002611  | ufd1l          | non-homologous recombination associated degradation 1 [Source:ZFIN;Acc:ZDB-GENE-040718-1]            | -0.837039825 | 0.155201687  | 3.143550555 | 2.151794062  |
| ENSRORG00000003175  | -              | -                                                                                                    | -4.546421489 | -0.034774562 | 5.529297055 | 1.012764984  |
| ENSRORG00000005316  | si:dkey-4p15.3 | si:dkey-4p15.3 [Source:ZFIN;Acc:ZDB-GENE-121214-31]                                                  | -2.260651338 | -0.350378737 | 3.168272391 | 1.25849471   |
| ENSRORG00000006754  | aaqab          | alpha and gamma adaptin binding protein [Source:ZFIN;Acc:ZDB-GENE-040718-120]                        | -4.056901559 | 1.273254331  | 4.377892201 | -0.951778396 |
| ENSRORG00000002911  | si:dkey-341l5  | si:dkey-341l5 [Source:ZFIN;Acc:ZDB-GENE-081107-1]                                                    | -3.508768807 | 1.967824435  | 3.983271423 | -1.492837875 |
| ENSRORG00000007053  | -              | -                                                                                                    | -3.301150251 | 0.729291674  | 3.962107332 | 0.41318023   |
| ENSRORG00000002028  | yk16           | YK16 v-SNARE homolog [Source:NCBI gene:Acc:101168625]                                                | -4.275343071 | 0.51356955   | 4.418663916 | -0.369763926 |
| ENSRORG00000012942  | -              | -                                                                                                    | -2.78710082  | 0.496232125  | 5.597403078 | 2.314558664  |
| ENSRORG00000006574  | anc5           | structural maintenance of chromosomes 5 [Source:ZFIN;Acc:ZDB-GENE-061013-288]                        | -0.918930611 | 0.537083646  | 3.113655526 | 1.658126198  |
| ENSRORG00000005874  | rad1           | RAD1 checkpoint DNA exonuclease [Source:NCBI gene:Acc:101166067]                                     | -2.923164378 | 0.844830487  | 4.903596903 | 1.136089972  |
| ENSRORG00000007081  | tpk1           | thiamin pyrophosphokinase 1 [Source:ZFIN;Acc:ZDB-GENE-041010-176]                                    | -14.94724334 | 1.280232963  | 17.3140268  | 1.087040299  |
| ENSRORG00000003864  | wdr82          | WD repeat domain R2 [Source:NCBI gene:Acc:10015105]                                                  | -2.376261616 | 1.195587215  | 4.724555065 | 1.153191104  |
| ENSRORG00000009100  | -              | -                                                                                                    | -8.239827409 | 0.996109957  | 4.458462335 | -4.76988707  |
| ENSRORG00000005376  | nl24-d1        | ribosomal L24 domain containing 1 [Source:NCBI gene:Acc:101172974]                                   | -3.70786104  | 2.628931867  | 4.594763513 | -1.764469511 |
| ENSRORG00000006479  | OTCR           | oligodactylin [Source:HGNC Symbol;Acc:HGNC:2517]                                                     | -1.770199943 | 1.293479563  | 4.489034508 | 1.408384511  |
| ENSRORG00000005712  | sgo3a          | SGO3A family member 3a [Source:ZFIN;Acc:ZDB-GENE-100921-84]                                          | -0.591135174 | 0.812340904  | 3.083337605 | 1.680266505  |
| ENSRORG00000010454  | -              | -                                                                                                    | -4.655840338 | 0.564529382  | 6.727178833 | -            |
| ENSRORG00000016451  | -              | -                                                                                                    | -19.35762823 | 1.07547097   | 17.86979788 | -3.16205109  |
| ENSRORG00000010815  | zfand1         | zinc finger, AN1-type domain 1 [Source:ZFIN;Acc:ZDB-GENE-040801-269]                                 | -5.678513428 | 2.324904367  | 7.595257663 | -0.407676654 |
| ENSRORG00000005109  | polr3k         | RNA polymerase II subunit K [Source:NCBI gene:Acc:101173392]                                         | -3.119768142 | 2.326714045  | 5.14648485  | -0.299512273 |
| ENSRORG00000012724  | CHRAC1         | chromatin accessibility complex 1 [Source:NCBI gene:Acc:101155927]                                   | -1.540915779 | 1.266786085  | 3.204347194 | 0.397130256  |
| ENSRORG00000009594  | snmcd1         | survival motor neuron domain containing 1 [Source:NCBI gene:Acc:101170118]                           | -6.666612002 | 0.70951344   | 7.678046521 | 0.300567106  |
| ENSRORG00000002198  | Rf00067        | small nuclear RNA SNORD15 [Source:NCBI gene:Acc:111848411]                                           | 1.278711878  | 1.913779475  | 3.252028181 | 2.61745029   |
| ENSRORG00000006956  | argag          | poly (ADP-ribose) glycohydrolase A [Source:ZFIN;Acc:ZDB-GENE-070117-757]                             | -2.428826896 | 0.654951749  | 3.213408938 | 0.130115237  |
| ENSRORG00000012336  | rgs16          | regulator of G protein signaling 16 [Source:ZFIN;Acc:ZDB-GENE-050417-393]                            | 0.062488866  | 2.924848907  | 3.091157899 | 0.229281922  |
| ENSRORG00000004999  | snr46          | thioredoxin like 48 [Source:NCBI gene:Acc:101174817]                                                 | -5.784815146 | 2.764014895  | 8.929590927 | 0.381245145  |
| ENSRORG00000009657  | hpp            | phosphotyrosine phosphatase inorganic pyrophosphate phosphatase [Source:ZFIN;Acc:ZDB-GENE-070615-43] | -4.239218449 | 0.11887831   | 3.374529355 | -0.983082248 |
| ENSRORG00000009629  | -              | -                                                                                                    | -3.671123267 | -0.056797435 | 5.679539585 | 2.05569888   |
| ENSRORG00000017704  | fam177a1       | family with sequence similarity 177 member A1 [Source:NCBI gene:Acc:101168907]                       | -3.11777036  | 0.296850814  | 4.184149461 | 0.770013023  |
| ENSRORG00000003373  | -              | -                                                                                                    | -1.504369118 | 0.409851735  | 3.464706402 | 1.550970284  |
| ENSRORG00000006257  | lamtor5        | late endosomal/lysosomal adaptor, MAPK and MTOR activator 5 [Source:NCBI gene:Acc:101160088]         | -1.954793529 | 0.492114356  | 3.149987611 | 0.703564643  |
| ENSRORG00000003951  | hngb1b         | high mobility group box 1B [Source:ZFIN;Acc:ZDB-GENE-030131-9480]                                    | -2.771156419 | 0.572369896  | 3.915647716 | 0.572606112  |
| ENSRORG00000007322  | mmp52          | mitochondrial ribosomal protein L52 [Source:ZFIN;Acc:ZDB-GENE-110325-11]                             | -2.772087033 | 0.552113869  | 5.111133334 | 1.787417294  |
| ENSRORG00000005385  | cmc1           | C-X9-C motif containing 1 [Source:ZFIN;Acc:ZDB-GENE-040426-2626]                                     | -1.752418674 | 0.94972843   | 4.281219373 | 1.579557227  |
| ENSRORG00000015875  | -              | -                                                                                                    | -2.749507932 | 0.013783466  | 3.06697004  | 0.304130822  |
| ENSRORG00000016447  | cdc20          | Cytoskeleton cell division cycle 20 (cdc20), mRNA [Source:RefSeq mRNA;Acc:NM_0160432]                | -4.277219337 | -0.013546088 | 3.869433311 | -0.393754729 |
| ENSRORG00000010766  | -              | -                                                                                                    | -0.693772552 | 1.814875697  | 5.259245036 | 2.751481549  |
| ENSRORG00000002136  | -              | -                                                                                                    | -5.81004101  | 2.71992741   | 5.414888219 | -3.104868588 |
| ENSRORG00000009192  | zdog1          | zdog1 [Source:ZFIN;Acc:ZDB-GENE-040625-142]                                                          | -1.573829867 | 0.444528673  | 3.544591274 | 1.531017827  |
| ENSRORG00000006201  | -              | -                                                                                                    | -0.765147215 | 1.245809615  | 3.38764457  | 1.377172836  |
| ENSRORG00000004752  | rip29          | glutathione S-transferase omega-1 [Source:NCBI gene:Acc:101171354]                                   | -2.04392455  | 1.613762564  | 4.619586224 | 0.962715936  |
| ENSRORG00000003832  | -              | -                                                                                                    | -2.969675389 | 0.750158197  | 4.962572869 | 1.243223546  |
| ENSRORG00000005153  | fra10ac1       | FRA10A associated CGG repeat 1 [Source:ZFIN;Acc:ZDB-GENE-041010-95]                                  | 0.036506388  | 0.227155492  | 3.032655436 | 2.842491447  |
| ENSRORG000000013917 | top1l          | DNA topoisomerase I, like [Source:ZFIN;Acc:ZDB-GENE-060618-217]                                      | -3.110262018 | 0.634501922  | 3.004037755 | -0.740241172 |
| ENSRORG000000015890 | atp6v1e1a      | V-type proton ATPase subunit E 1 [Source:NCBI gene:Acc:101155846]                                    | -4.556435834 | -0.356395957 | 3.25634304  | -0.943208395 |
| ENSRORG00000003995  | si:dkey-6i22.5 | polyamine-modulated factor 1 [Source:NCBI gene:Acc:101157851]                                        | -3.369578671 | 1.655239918  | 6.67676546  | 1.652431719  |
| ENSRORG000000005282 | -              | -                                                                                                    | -1.790173311 | 2.048388149  | 6.349738229 | 2.511679862  |
| ENSRORG00000014432  | mks1           | Mckel syndrome type 1 [Source:ZFIN;Acc:ZDB-GENE-030131-3813]                                         | -2.886371794 | 0.014985336  | 4.754596743 | 1.853724458  |
| ENSRORG000000090410 | rab5f          | RAB5 interacting factor [Source:ZFIN;Acc:ZDB-GENE-030131-5989]                                       | -17.37542351 | 1.991118447  | 18.34438417 | -0.021667583 |
| ENSRORG000000016892 | mrx18a         | mitochondrial ribosomal protein S18A [Source:ZFIN;Acc:ZDB-GENE-041210-109]                           | -4.358165368 | 1.089086761  | 5.50236954  | 0.055602237  |
| ENSRORG00000005646  | -              | -                                                                                                    | -13.23668693 | 1.843188662  | 16.85903703 | 1.77861999   |
| ENSRORG00000011142  | tfp1           | TCF3 fusion partner [Source:NCBI gene:Acc:101162156]                                                 | -2.635911653 | 0.948472119  | 3.65717434  | 0.073418507  |
| ENSRORG00000009352  | -              | -                                                                                                    | -1.195606836 | 0.557670154  | 3.921048516 | 2.168257227  |
| ENSRORG000000012178 | tmem230b       | transmembrane protein 230b [Source:ZFIN;Acc:ZDB-GENE-070820-4]                                       | -1.945410403 | 0.753449046  | 4.006670142 | 1.30829575   |
| ENSRORG000000013523 | sumo3a         | small ubiquitin-like modifier 3a [Source:ZFIN;Acc:ZDB-GENE-040426-2133]                              | -0.99716695  | 0.791162829  | 3.557173752 | 1.769292816  |
| ENSRORG000000013425 | lsm5           | LSM5 homolog. US small nuclear RNA and mRNA degradation associated [Source:NCBI gene:Acc:101173442]  | -2.005232425 | 1.275243356  | 3.399287007 | 0.119296162  |
| ENSRORG00000000512  | -              | -                                                                                                    | -15.66568789 | 0.486610083  | 16.98379591 | 0.831987963  |



|                     |                |                                                                                                             |              |              |              |              |
|---------------------|----------------|-------------------------------------------------------------------------------------------------------------|--------------|--------------|--------------|--------------|
| ENSRORG0000009553   | atmin          | ATM interactor [Source:ZFIN;Acc:ZDB-GENE-030616-220]                                                        | -1.637395916 | 0.592359065  | 3.090709904  | 0.861439714  |
| ENSRORG0000008024   | copz1          | coatomer protein complex subunit zeta 1 [Source:ZFIN;Acc:ZDB-GENE-000406-6]                                 | -4.194884974 | 2.162972222  | 6.735585167  | 0.37821267   |
| ENSRORG0000006027   | atn3           | atn3 [Source:ZFIN;Acc:ZDB-GENE-040426-983]                                                                  | -16.62320635 | 1.371993808  | 17.98628256  | -0.3964763   |
| ENSRORG0000009542   | -              | -                                                                                                           | -1.09278451  | 1.07160537   | 3.64858653   | 1.53610974   |
| ENSRORG0000021764   | -              | -                                                                                                           | -1.116218989 | 15.30901549  | 4.86547478   | 0.719115491  |
| ENSRORG0000003861   | -              | -                                                                                                           | -12.78500283 | 2.697675914  | 17.01578744  | 1.535959476  |
| ENSRORG0000001137   | ndufa3         | NADH dehydrogenase (ubiquinone) 1 alpha subcomplex, 3 [Source:ZFIN;Acc:ZDB-GENE-040801-18]                  | -18.58421079 | 1.293797517  | 20.03074438  | 0.153226097  |
| ENSRORG0000001139   | fam173a        | family with sequence similarity 173, member A [Source:ZFIN;Acc:ZDB-GENE-040625-59]                          | -0.903653746 | 1.654365302  | 4.540498074  | 1.982963949  |
| ENSRORG00000015618  | -              | -                                                                                                           | 0.208380344  | 1.257750397  | 4.019201463  | 2.971316187  |
| ENSRORG0000009636   | tbn28          | RNA binding motif protein 28 [Source:ZFIN;Acc:ZDB-GENE-040426-960]                                          | -2.021120916 | 1.130649083  | 3.746754757  | 0.595469489  |
| ENSRORG0000004227   | dniz           | DNA-type zinc finger [Source:ZFIN;Acc:ZDB-GENE-070112-1482]                                                 | -4.025072773 | 0.733075024  | 3.777664193  | -0.979998241 |
| ENSRORG00000002261  | ubtq1          | ubiquitin like domain containing CTD phosphatase 1 [Source:NCBI;gene:Acc:101175164]                         | -3.33570191  | 0.823237189  | 4.139425893  | -0.019028211 |
| ENSRORG00000018601  | atg12          | ATG12 autophagy related 12 homolog (S. cerevisiae) [Source:ZFIN;Acc:ZDB-GENE-071205-7]                      | -2.316283464 | 0.613692502  | 3.033277019  | 0.103806014  |
| ENSRORG00000014805  | -              | -                                                                                                           | -9.444173414 | 1.713166299  | 5.132185505  | -6.024668691 |
| ENSRORG00000012945  | wrb            | tryptophan rich basic protein [Source:ZFIN;Acc:ZDB-GENE-030131-7686]                                        | -3.64713528  | 0.071694332  | 3.558022029  | -0.160322856 |
| ENSRORG00000007904  | ube2w          | ubiquitin-conjugating enzyme E2W (putative) [Source:ZFIN;Acc:ZDB-GENE-050506-34]                            | -3.110764005 | 2.33725761   | 5.490834318  | 0.043000197  |
| ENSRORG00000007811  | -              | -                                                                                                           | -2.605169    | 0.631083992  | 4.718385248  | 1.48261719   |
| ENSRORG00000007140  | polr2h         | RNA polymerase II subunit H [Source:NCBI;gene:Acc:101189428]                                                | -7.433728165 | 1.731301036  | 9.208984497  | 0.044441709  |
| ENSRORG00000003083  | -              | -                                                                                                           | 1.617318673  | 4.94268656   | 5.156208344  | 1.83132231   |
| ENSRORG00000017109  | -              | -                                                                                                           | -1.015537125 | 0.427311333  | 3.247694891  | 1.805331193  |
| ENSRORG00000005528  | trappc2l       | trafficking protein particle complex 2 like [Source:NCBI;gene:Acc:101171474]                                | -3.930307748 | 2.182517268  | 7.607198176  | 1.494857481  |
| ENSRORG00000011425  | chmp5b         | charged multivesicular body protein 5 [Source:NCBI;gene:Acc:101159542]                                      | -1.235983567 | 1.135504544  | 3.202362546  | 0.831359291  |
| ENSRORG00000003041  | -              | -                                                                                                           | -1.43105244  | 2.20819178   | 5.5064923    | 1.86772952   |
| ENSRORG00000009874  | rab2           | RAB, member of RAS oncogene family-like 2 [Source:ZFIN;Acc:ZDB-GENE-060503-464]                             | -0.204497353 | 1.980985106  | 4.546582346  | 2.361584558  |
| ENSRORG00000004700  | vps36          | vesicular protein sorting 36 homolog [Source:NCBI;gene:Acc:101172754]                                       | -2.752840087 | 0.236514493  | 4.683277645  | 1.694407821  |
| ENSRORG00000008901  | -              | -                                                                                                           | -3.345991044 | -0.888993805 | 4.410209649  | 1.953697429  |
| ENSRORG00000016868  | -              | -                                                                                                           | -4.97168988  | 0.90278537   | 6.892705513  | 0.02172658   |
| ENSRORG00000009747  | uroc           | uroporphyrinogen III synthase [Source:NCBI;gene:Acc:101165599]                                              | -1.205796483 | 0.906890507  | 3.82089333   | 1.708593065  |
| ENSRORG00000014484  | -              | -                                                                                                           | -0.42547732  | 2.106337454  | 5.371410265  | 2.790380337  |
| ENSRORG00000015816  | -              | -                                                                                                           | -3.3087681   | -0.018649357 | 4.548293538  | 1.258659751  |
| ENSRORG00000010498  | fam135a        | family with sequence similarity 135, member A [Source:ZFIN;Acc:ZDB-GENE-080130-1]                           | -0.835250087 | 0.892371768  | 3.100312914  | 1.373175962  |
| ENSRORG00000017293  | mett8          | methyltransferase like 8 [Source:ZFIN;Acc:ZDB-GENE-041114-19]                                               | -16.26336421 | 2.295508185  | 17.05182442  | -1.50655793  |
| ENSRORG00000004602  | elov17a        | ELCVL fatty acid elongase 7a [Source:ZFIN;Acc:ZDB-GENE-030131-6149]                                         | -1.837031926 | 1.033577705  | 3.647015714  | 0.776891084  |
| ENSRORG00000007971  | ctb5           | chromobox homolog 5 (HP1 alpha homolog, Drosophila) [Source:ZFIN;Acc:ZDB-GENE-030131-5553]                  | -1.793178257 | 1.18664817   | 4.0283985    | 1.049052223  |
| ENSRORG00000000519  | -              | -                                                                                                           | -1.777635799 | 0.416288111  | 3.89602457   | 1.502584112  |
| ENSRORG00000001649  | -              | -                                                                                                           | -1.861059623 | 0.411261932  | 3.794647212  | 1.522810603  |
| ENSRORG00000008281  | lyar           | Lyl antibody reactive [Source:NCBI;gene:Acc:101158787]                                                      | -4.08788306  | 1.120770616  | 5.507279974  | 0.299110924  |
| ENSRORG00000013308  | polr2i         | RNA polymerase II subunit I [Source:NCBI;gene:Acc:101158787]                                                | -1.116439992 | 1.163228454  | 3.67471747   | 1.395533782  |
| ENSRORG00000006284  | BLOC1S1        | biogenesis of lysosomal organelles complex 1 subunit 1 [Source:HGN;Symbol:Acc:HGN-4200]                     | -1.517914712 | 0.830670387  | 3.214443244  | 0.866343078  |
| ENSRORG000000017183 | -              | -                                                                                                           | -7.931697774 | -0.980725117 | 4.459810299  | -2.490677886 |
| ENSRORG00000017910  | morc3a         | MORC family CW-type zinc finger 3a [Source:ZFIN;Acc:ZDB-GENE-030131-1502]                                   | -2.936462092 | -0.222576703 | 4.14261893   | 1.42921837   |
| ENSRORG00000010208  | vps26a         | VPS26, retromer complex component A [Source:ZFIN;Acc:ZDB-GENE-040426-1108]                                  | -5.100755065 | 0.765753898  | 6.109381597  | 0.243357319  |
| ENSRORG00000008283  | srrd           | SRR1 domain containing [Source:ZFIN;Acc:ZDB-GENE-060825-269]                                                | -3.852781052 | 0.361036437  | 3.557772135  | -0.655560767 |
| ENSRORG00000007375  | -              | -                                                                                                           | -1.321070975 | 1.706210574  | 5.466661793  | 2.438685082  |
| ENSRORG00000010845  | -              | -                                                                                                           | -3.054610541 | -0.772913836 | 5.181913869  | 2.906696965  |
| ENSRORG00000002369  | bnip1b         | vesicle transport protein SEC20 [Source:NCBI;gene:Acc:101155624]                                            | -1.378914    | -0.145380097 | 3.838232258  | 2.605182947  |
| ENSRORG00000010559  | lts1           | leucine zipper, putative tumor suppressor 1 [Source:ZFIN;Acc:ZDB-GENE-081104-431]                           | 0.990878684  | 3.252971439  | 3.509368597  | 1.247761425  |
| ENSRORG00000003347  | -              | -                                                                                                           | -2.993711048 | 0.496493082  | 5.042084698  | 1.550365779  |
| ENSRORG00000017929  | -              | -                                                                                                           | -1.305747675 | 2.594350523  | 6.8149764    | 2.913411687  |
| ENSRORG00000007453  | DNAJA4         | DnaJ heat shock protein family (Hsp40) member A4 [Source:HGN;Symbol:Acc:HGN-14885]                          | -5.057866323 | -0.037633316 | 5.367514677  | 0.002770002  |
| ENSRORG00000017604  | -              | -                                                                                                           | -1.819253532 | -0.615910445 | 3.48935419   | 2.286497586  |
| ENSRORG00000010746  | -              | -                                                                                                           | -0.441291664 | 1.002679313  | 3.265145844  | 1.821659964  |
| ENSRORG00000011232  | hfdz1          | SFT2 domain containing 1 [Source:ZFIN;Acc:ZDB-GENE-040426-1350]                                             | -2.59326092  | 1.153159776  | 4.827233234  | 1.081031924  |
| ENSRORG00000020256  | dun1jds        | DCN1 like protein 5 [Source:NCBI;gene:Acc:101185657]                                                        | -3.12173969  | 0.318423524  | 4.676158823  | 1.2264778    |
| ENSRORG00000005104  | anrp25         | small nuclear ribonucleoprotein 25 [Source:ZFIN;Acc:ZDB-GENE-050417-179]                                    | -4.518718717 | 1.065034663  | 5.519304671  | -0.06396216  |
| ENSRORG00000011823  | -              | -                                                                                                           | -8.239279046 | 0.761335175  | 5.355117936  | -3.64501184  |
| ENSRORG00000016960  | mpf54          | mitochondrial ribosomal protein L54 [Source:NCBI;gene:Acc:101160060]                                        | -2.223990137 | 1.214131228  | 3.168005622  | -0.26959964  |
| ENSRORG00000017216  | -              | -                                                                                                           | -4.615830937 | 1.585326886  | 5.404938937  | -0.795435395 |
| ENSRORG00000012015  | si-ch211-11k13 | si-ch211-11k13.4 [Source:ZFIN;Acc:ZDB-GENE-070912-22]                                                       | -5.276535043 | -0.195648531 | 3.572871011  | -1.507530685 |
| ENSRORG00000006478  | -              | -                                                                                                           | -1.456091785 | 0.686641125  | 3.106898491  | 0.964650703  |
| ENSRORG00000013541  | -              | -                                                                                                           | -0.291833172 | 0.907769707  | 3.135271088  | 1.938656253  |
| ENSRORG00000009378  | snx24          | sorting nexin 24 [Source:NCBI;gene:Acc:101172180]                                                           | -2.468847738 | 1.273783471  | 4.289391688  | 0.542924507  |
| ENSRORG000000015748 | cnqa3a         | cyclic nucleotide gated channel alpha 3a [Source:ZFIN;Acc:ZDB-GENE-090611-21]                               | -5.46290788  | -0.031827161 | 6.94205468   | 1.503401139  |
| ENSRORG00000021281  | RF00026        | U6 small nuclear RNA [Source:NCBI]                                                                          | -0.580612668 | 1.83104772   | 5.130889704  | 2.739718251  |
| ENSRORG00000007443  | exoc2          | exosome component 2 [Source:NCBI;gene:Acc:101162770]                                                        | -3.171039957 | 0.380144539  | 3.835414818  | 0.284714977  |
| ENSRORG00000003368  | RPA1 (1 of ma  | replication protein A1 [Source:HGN;Symbol:Acc:HGN-10289]                                                    | -0.647491774 | 0.284506605  | 3.582500953  | 2.650987236  |
| ENSRORG00000004450  | wrap73         | WD repeat containing, antisense to TP73 [Source:NCBI;gene:Acc:101188286]                                    | -0.609298861 | -0.023277768 | 3.302816773  | 2.717280572  |
| ENSRORG00000012043  | taf1a          | TATA box binding protein (TBP)-associated factor, RNA polymerase I, A [Source:ZFIN;Acc:ZDB-GENE-041014-272] | -4.447460052 | 1.206136551  | 4.689143178  | -0.963968812 |
| ENSRORG00000012750  | setb           | protein SET [Source:NCBI;gene:Acc:101171505]                                                                | -2.433797037 | 0.436545408  | 3.079695689  | 0.209838127  |
| ENSRORG00000017693  | -              | -                                                                                                           | -4.571258789 | 0.483022881  | 4.32881891   | -0.72497398  |
| ENSRORG00000017740  | -              | -                                                                                                           | -3.94859382  | 0.133919648  | 5.371705035  | 1.388917894  |
| ENSRORG00000013412  | dnosp2         | dnocytosinase 2 [Source:ZFIN;Acc:ZDB-GENE-120419-2]                                                         | -2.290389056 | -0.35650366  | 3.828902033  | 0.985499675  |
| ENSRORG00000001212  | -              | -                                                                                                           | -15.62879808 | 1.701940505  | 16.54778347  | -0.782965126 |
| ENSRORG00000014226  | med18          | mediator complex subunit 18 [Source:NCBI;gene:Acc:101165587]                                                | -2.418133571 | -0.013556545 | 3.362461844  | 0.958369484  |
| ENSRORG00000005117  | exoc10         | exosome component 10 [Source:NCBI;gene:Acc:101172813]                                                       | -2.539383228 | -0.283568584 | 3.728927427  | 1.47359765   |
| ENSRORG00000013980  | -              | -                                                                                                           | -10.13224266 | 4.863986355  | 15.953222276 | 0.957478594  |
| ENSRORG00000005597  | -              | -                                                                                                           | -4.338308864 | 0.381591162  | 3.848042059  | -0.871373315 |

|                     |               |                                                                                            |              |              |             |              |
|---------------------|---------------|--------------------------------------------------------------------------------------------|--------------|--------------|-------------|--------------|
| ENSORLG0000001815   | -             | -                                                                                          | -6.218742728 | 1.175775811  | 3.907499466 | -3.486534750 |
| ENSORLG0000000232   | mphosph6      | M-phase phosphoprotein 6 [Source:NCBI gene:Acc10117370]                                    | -1.710122057 | -0.212511877 | 3.065131723 | 1.568006482  |
| ENSORLG00000015955  | sp3b6         | splicing factor 3b subunit 6 [Source:NCBI gene:Acc101163944]                               | -4.797507178 | 0.779991299  | 7.066889818 | 1.489875074  |
| ENSORLG00000012697  | uqcrb         | cytochrome b-c1 complex subunit 7 [Source:NCBI gene:Acc101165157]                          | -4.552364701 | 2.412165623  | 6.768652971 | -0.195392633 |
| ENSORLG00000009342  | PDCD5         | programmed cell death 5 [Source:NCBI gene:Acc101170335]                                    | -1.28044675  | 1.228169022  | 3.507452461 | 0.999321442  |
| ENSORLG00000011018  | -             | -                                                                                          | -3.218315288 | 1.770815344  | 5.036416331 | 0.04771359   |
| ENSORLG00000006532  | -             | -                                                                                          | -2.714843648 | 0.309282502  | 4.360981025 | 1.337339795  |
| ENSORLG00000008131  | map3k19       | mitogen-activated protein kinase kinase kinase 19 [Source:ZFIN:Acc-ZDB-GENE-081104-149]    | 1.201866652  | 2.622266253  | 3.512549761 | 2.092635039  |
| ENSORLG00000001966  | chc1c1        | cysteine-rich hydrophobic domain 1 [Source:ZFIN:Acc-ZDB-GENE-030131-7763]                  | -0.949920067 | 0.179136338  | 3.448562476 | 2.319990912  |
| ENSORLG00000006704  | -             | -                                                                                          | -3.335176896 | 2.99473009   | 4.550834538 | -1.778870888 |
| ENSORLG00000003143  | -             | -                                                                                          | -5.238217287 | 0.776760753  | 6.995565745 | 0.981072186  |
| ENSORLG000000015969 | si.ch211-225b | si.ch211-225b10.3 [Source:ZFIN:Acc-ZDB-GENE-130531-53]                                     | -1.31798629  | -0.814746533 | 3.130702531 | 2.627947778  |
| ENSORLG00000006336  | -             | -                                                                                          | -5.209909194 | -0.565959863 | 3.798238402 | -0.845226057 |
| ENSORLG00000002362  | bod1          | biorientation of chromosomes in cell division 1 [Source:ZFIN:Acc-ZDB-GENE-060810-163]      | -2.947933059 | -0.152766698 | 4.565005901 | 1.77032503   |
| ENSORLG00000003485  | ap1s2         | adaptor-related protein complex 1, sigma 2 subunit [Source:ZFIN:Acc-ZDB-GENE-030131-5448]  | 0.251848934  | 1.162740075  | 3.310820069 | 2.40041383   |
| ENSORLG000000015691 | ER3P1         | immediate early response 3-interacting protein 1 [Source:NCBI gene:Acc101155933]           | -2.081471837 | 0.839199914  | 3.501867559 | 0.581680615  |
| ENSORLG000000014700 | -             | -                                                                                          | -5.176812119 | 0.197269692  | 4.072278253 | -1.841318581 |
| ENSORLG000000014954 | sem4de        | semaphorin 4e [Source:ZFIN:Acc-ZDB-GENE-990715-7]                                          | -0.310894745 | 0.714022271  | 3.038422008 | 2.014820035  |
| ENSORLG000000016530 | -             | -                                                                                          | 17.57273085  | 15.35163127  | 4.37550582  | 1.551334838  |
| ENSORLG00000008811  | kjun1d1       | DNK1-like protein 1 [Source:NCBI gene:Acc101167649]                                        | -2.854352473 | 2.658692218  | 5.741500398 | 0.228940375  |
| ENSORLG000000012852 | zgc:111986    | chromosome 11 C6orf62 homolog [Source:NCBI gene:Acc101167123]                              | 0.356598952  | 1.794238576  | 4.025341432 | 2.588184651  |
| ENSORLG000000017518 | chm1          | chiasm1 [Source:ZFIN:Acc-ZDB-GENE-040426-193d]                                             | 0.488724994  | 2.874070277  | 4.439849934 | 2.034988834  |
| ENSORLG000000014060 | fbx1          | rna-box 1 [Source:NCBI gene:Acc101170590]                                                  | -2.417006307 | 0.787964822  | 4.194706813 | 0.990220736  |
| ENSORLG000000014153 | -             | -                                                                                          | -0.407530021 | 1.11434332   | 4.435318916 | 2.974239961  |
| ENSORLG00000005011  | -             | -                                                                                          | -15.40402623 | 1.001076845  | 18.08953977 | 1.68527682   |
| ENSORLG000000005979 | saal1         | serum amyloid A-like 1 [Source:ZFIN:Acc-ZDB-GENE-040426-72s]                               | -2.930909188 | -0.391781029 | 4.681009866 | 2.142366902  |
| ENSORLG000000012528 | -             | -                                                                                          | -0.550199452 | 1.214251615  | 3.036836887 | 1.272870884  |
| ENSORLG000000069817 | -             | -                                                                                          | -2.552929673 | -0.252082823 | 4.13801895  | 0.836440111  |
| ENSORLG00000005711  | tm4a          | thioredoxin like 4A [Source:NCBI gene:Acc101166315]                                        | -3.645797629 | 1.450195559  | 5.523393952 | 0.428947775  |
| ENSORLG00000007900  | atocb         | atocan C [Source:NCBI gene:Acc101173584]                                                   | -6.285496008 | 2.301282256  | 7.560492667 | -1.028800732 |
| ENSORLG000000010415 | dhps          | deoxyhypusine synthase [Source:NCBI gene:Acc101170086]                                     | -0.780682412 | 0.709920319  | 3.087423899 | 1.597315078  |
| ENSORLG000000011717 | ube2d4        | ubiquitin-conjugating enzyme E2 D4 [Source:NCBI gene:Acc101172587]                         | -8.126296093 | 1.785496675  | 10.50009179 | 0.588789056  |
| ENSORLG00000006138  | glod5         | glyoxalase domain containing 5 [Source:NCBI gene:Acc101168784]                             | -2.235972122 | 0.414378465  | 3.311243411 | 0.661377582  |
| ENSORLG000000016132 | -             | -                                                                                          | -3.953722807 | -0.228806115 | 3.493768534 | -0.230674722 |
| ENSORLG000000020469 | bloc16        | biogenesis of lysosomal organelles complex 1 subunit 6 [Source:NCBI gene:Acc101172565]     | -2.233801152 | 0.252711894  | 3.383876374 | 0.897848537  |
| ENSORLG000000016957 | lms32a        | family with sequence similarity 32 member A [Source:NCBI gene:Acc101159813]                | -1.512077092 | 0.547512417  | 5.00650013  | 2.947395437  |
| ENSORLG00000003070  | cnps          | centromere protein 3 [Source:NCBI gene:Acc101169348]                                       | -1.268453167 | 0.418549021  | 3.303677423 | 1.6181160231 |
| ENSORLG000000021348 | rfl0309       | small nucleolar RNA snR60/Z15/Z30/Z193/17 [Source:NCBI gene:Acc111947415]                  | -3.035678495 | 2.791306435  | 6.289618997 | 0.463122092  |
| ENSORLG000000015281 | asdurf        | asparagine synthetase domain containing 1 [Source:NCBI gene:Acc111946260]                  | -2.139004391 | 0.846828407  | 3.139863007 | 0.154514934  |
| ENSORLG00000006055  | ngn           | neugrin, neurite outgrowth associated [Source:NCBI gene:Acc101159100]                      | -2.960001426 | -0.184916011 | 3.131620781 | 0.357020315  |
| ENSORLG00000006670  | nuc2a         | nucleolin 2a [Source:ZFIN:Acc-ZDB-GENE-030826-14]                                          | 0.274414246  | 2.014081351  | 3.554687477 | 1.81550523   |
| ENSORLG00000002350  | trmt12        | RNA methyltransferase subunit 11-2 [Source:NCBI gene:Acc101155291]                         | -3.514505213 | 0.563871183  | 4.217483251 | 0.139591653  |
| ENSORLG000000015322 | -             | -                                                                                          | -2.792808069 | -0.291335566 | 3.644892092 | 1.14390523   |
| ENSORLG000000012129 | bnp3a         | BCL2 interacting protein 3 like a [Source:ZFIN:Acc-ZDB-GENE-030131-228f]                   | -1.608105996 | 1.297903877  | 3.683684803 | 0.778159858  |
| ENSORLG000000010326 | -             | -                                                                                          | -3.855240855 | 0.058483573  | 6.14846535  | 2.505224169  |
| ENSORLG000000015994 | spcs1         | signal peptidase complex subunit 1 [Source:NCBI gene:Acc101160314]                         | -2.237033199 | 1.518120435  | 3.510077138 | -0.244591598 |
| ENSORLG000000013809 | bud31         | BUD31 homolog [Source:NCBI gene:Acc101174835]                                              | -3.172086108 | 1.901884346  | 5.01978522  | -0.053700292 |
| ENSORLG000000012977 | -             | -                                                                                          | -1.04528621  | 1.580045053  | 4.190945049 | 1.566098706  |
| ENSORLG000000017157 | zbtb8os       | zinc finger and BTB domain containing 8 opposite strand [Source:NCBI gene:Acc101154822]    | -1.724370183 | 2.089982931  | 4.041873243 | 0.228005059  |
| ENSORLG000000014275 | yju2          | YJU2 splicing factor homolog [Source:ZFIN:Acc-ZDB-GENE-040426-84f]                         | -4.236341554 | -0.207559588 | 3.876489309 | -0.151807947 |
| ENSORLG000000017897 | pp2r3c        | protein phosphatase 2 regulatory subunit B, gamma [Source:ZFIN:Acc-ZDB-GENE-040426-71s]    | -3.467519098 | 1.083938132  | 5.541415672 | 0.990443073  |
| ENSORLG00000001671  | -             | -                                                                                          | -0.459516024 | 0.253563735  | 3.7462799   | 2.562033147  |
| ENSORLG000000004653 | psmh3         | proteasome (prosome, macropain) assembly chaperone 3 [Source:ZFIN:Acc-ZDB-GENE-040718-282] | -1.925350354 | 1.508106777  | 4.136207047 | 0.703235887  |
| ENSORLG000000016959 | -             | -                                                                                          | -3.492960278 | 1.782183369  | 7.549723177 | 2.274529036  |
| ENSORLG000000010194 | -             | -                                                                                          | -0.283693544 | 0.872493006  | 3.027138774 | 1.861764472  |
| ENSORLG00000006361  | fen1          | flap structure-specific endonuclease 1 [Source:NCBI gene:Acc101158562]                     | -1.307069428 | 0.245137358  | 3.227722202 | 1.676000179  |
| ENSORLG000000016318 | gstz1         | glutathione S-transferase zeta 1 [Source:NCBI gene:Acc101162471]                           | -4.853594658 | 1.113728839  | 5.151882633 | -0.814895722 |
| ENSORLG000000002795 | mrrp37        | mitochondrial ribosomal protein S17 [Source:NCBI gene:Acc101159284]                        | -4.847055561 | 1.50218494   | 6.607078594 | 0.25832056   |
| ENSORLG000000004007 | -             | -                                                                                          | 11.77026745  | 13.87572389  | 3.924250737 | 1.819213674  |
| ENSORLG000000009091 | ube2a         | ubiquitin-conjugating enzyme E2 A [Source:NCBI gene:Acc101158022]                          | -3.438124818 | 2.97552634   | 5.749674532 | -0.645517655 |
| ENSORLG000000010757 | -             | -                                                                                          | -0.551698662 | 1.782070096  | 5.185643986 | 2.862368451  |
| ENSORLG000000016425 | cow6b2        | cytochrome c oxidase subunit VIb polypeptide 2 [Source:ZFIN:Acc-ZDB-GENE-040426-1566]      | 0.853045833  | 1.202931958  | 3.100161655 | 2.749760545  |
| ENSORLG000000005635 | eeflakmt2     | EEFLA lysine methyltransferase 2 [Source:NCBI gene:Acc101168144]                           | -2.476001436 | 2.91850206   | 4.82439427  | -0.569624386 |
| ENSORLG000000010369 | vasna         | vasonin a [Source:ZFIN:Acc-ZDB-GENE-050622-43]                                             | 0.015335050  | 2.872715397  | 3.172788268 | 0.316393076  |
| ENSORLG000000004486 | -             | -                                                                                          | 10.25542992  | 14.39966378  | 5.501806416 | 1.35804543   |
| ENSORLG000000012749 | PSMG4         | proteasome assembly chaperone 4 [Source:NCBI gene:Acc101161967]                            | -1.470861855 | 0.538801309  | 3.207057046 | 1.197878761  |
| ENSORLG000000005841 | C18orf32      | chromosome 18 open reading frame 32 [Source:HGNC Symbol:Acc-HGNC:31690]                    | -6.070982275 | 2.019765498  | 8.206985912 | 0.116722805  |
| ENSORLG000000012281 | prn1          | DNA primase subunit 1 [Source:ZFIN:Acc-ZDB-GENE-990603-6]                                  | -0.999085144 | 0.632183941  | 3.033628565 | 1.402844379  |
| ENSORLG000000004680 | glod4         | glyoxalase domain containing 4 [Source:ZFIN:Acc-ZDB-GENE-040912-38]                        | -5.617667491 | 0.105636974  | 4.78991174  | -0.932908114 |
| ENSORLG000000010302 | lmbd1         | LMBR1 domain containing 1 [Source:ZFIN:Acc-ZDB-GENE-041212-38]                             | -2.773771403 | 0.706724449  | 3.980636093 | 0.500625224  |
| ENSORLG000000015136 | RANBP1        | RAN binding protein 1 [Source:NCBI gene:Acc101155441]                                      | -2.934933334 | 0.926723088  | 3.644381316 | -0.216790234 |
| ENSORLG00000000243  | -             | -                                                                                          | -2.364381492 | 1.747701056  | 5.044689853 | 0.933092964  |
| ENSORLG000000011383 | coa3a         | cytochrome C oxidase assembly factor 3a [Source:ZFIN:Acc-ZDB-GENE-060810-187]              | -3.387111035 | 0.808952363  | 3.400520672 | -0.795057775 |
| ENSORLG000000021634 | rfl01299      | small nucleolar RNA SNORD2 [Source:NCBI gene:Acc111949143]                                 | 5.718635616  | 13.9284351   | 10.92935521 | 2.72002741   |

|                     |               |                                                                                                                                                         |              |              |             |              |
|---------------------|---------------|---------------------------------------------------------------------------------------------------------------------------------------------------------|--------------|--------------|-------------|--------------|
| ENSORLG0000010447   | zfp3b         | cugbp. Elav-like family member 3b [Source:ZFIN;Acc:ZDB-GENE-110408-50]                                                                                  | -0.70655885  | 1.24441808   | 3.505144069 | 1.554651894  |
| ENSORLG0000007712   | znftq         | N-acetylglucosamine-1-phosphatase transferase gamma subunit [Source:ZFIN;Acc:ZDB-GENE-040625-18]                                                        | -7.845821223 | 1.943314541  | 8.0268977   | -1.761747927 |
| ENSORLG0000001586   | lph           | LLP homolog, long-term synaptic facilitation factor [Source:NCBI;gene:Acc:101155243]                                                                    | -6.921206465 | 0.374877684  | 6.991446606 | -0.304152446 |
| ENSORLG00000017208  | sst           | Sjogren syndrome antigen B (autoantigen La) [Source:ZFIN;Acc:ZDB-GENE-030131-223]                                                                       | -5.254284324 | 0.67864917   | 5.641611282 | -0.290837535 |
| ENSORLG00000006325  | usp39         | ubiquitin specific peptidase 39 [Source:NCBI;gene:Acc:101161161]                                                                                        | -3.323488914 | 0.400787331  | 3.508618651 | -0.215174444 |
| ENSORLG00000006428  | -             | -                                                                                                                                                       | -3.202274475 | 0.947206398  | 4.608339365 | 0.45934538   |
| ENSORLG00000016887  | -             | -                                                                                                                                                       | 12.61455572  | 14.31970561  | 3.15055519  | 1.448698724  |
| ENSORLG00000011829  | -             | -                                                                                                                                                       | -3.393179296 | -0.77265401  | 3.68817745  | 1.08364728   |
| ENSORLG00000010497  | lysd3         | Ly5M, putative peptidoglycan-binding domain containing 3 [Source:ZFIN;Acc:ZDB-GENE-040625-88]                                                           | -3.380152139 | 0.818107177  | 3.783079966 | -0.414694359 |
| ENSORLG00000012275  | MRPL51        | mitochondrial ribosomal protein L51 [Source:NCBI;gene:Acc:101173004]                                                                                    | -2.837711389 | 0.75953212   | 3.737041027 | 0.140282574  |
| ENSORLG00000012228  | bxndc9        | thioredoxin domain containing 9 [Source:NCBI;gene:Acc:101166757]                                                                                        | -2.034960074 | 1.07118929   | 4.788336104 | 1.682671498  |
| ENSORLG00000021421  | rf00619       | UGatac minor spliceosomal RNA [Source:NCBI;gene:Acc:111947485]                                                                                          | -4.683410599 | 0.817586989  | 7.167127298 | 1.666614866  |
| ENSORLG00000004878  | ubfd1         | ubiquitin family domain containing 1 [Source:NCBI;gene:Acc:101171414]                                                                                   | -4.132480774 | 0.924475632  | 6.527780575 | 1.471308909  |
| ENSORLG00000014031  | czep1r1       | CTD nuclear envelope phosphatase 1 regulatory subunit 1 [Source:NCBI;gene:Acc:101165466]                                                                | -4.147202646 | 1.843014307  | 5.824578965 | -0.165153228 |
| ENSORLG00000012821  | ctm5          | dynactin subunit 5 [Source:NCBI;gene:Acc:101164808]                                                                                                     | -2.290208754 | 0.815749193  | 4.419255551 | 1.313962028  |
| ENSORLG00000004347  | tas1r2a       | Oryzias latipes taste receptor, type 1, member 2a (tas1r2a), mRNA [Source:RefSeq; mRNA:Acc:NM_001104958]                                                | -3.813760597 | 1.408489676  | 5.434345672 | 0.212581537  |
| ENSORLG00000003149  | -             | -                                                                                                                                                       | -2.346426362 | -0.257561666 | 4.263739586 | 2.173596992  |
| ENSORLG000000013767 | -             | putative uncharacterized protein DDB_G0292636 [Source:NCBI;gene:Acc:105355509]                                                                          | -6.256978795 | 1.029562983  | 5.686071339 | -1.599985495 |
| ENSORLG00000011556  | -             | -                                                                                                                                                       | -3.526109848 | 0.373396666  | 4.988453117 | 1.089431407  |
| ENSORLG00000006323  | prkacha       | protein kinase cAMP-activated catalytic subunit beta [Source:NCBI;gene:Acc:101180309]                                                                   | -0.007179718 | 1.66285217   | 3.896308376 | 2.226761122  |
| ENSORLG00000006663  | -             | uncharacterized LOC101162837 [Source:NCBI;gene:Acc:101162837]                                                                                           | -2.956618666 | 0.158161087  | 3.811310471 | 0.697015552  |
| ENSORLG000000013934 | psmd12        | proteasome 26S subunit, non-ATPase 12 [Source:ZFIN;Acc:ZDB-GENE-030131-617]                                                                             | -1.663488784 | 0.076491133  | 3.167183256 | 1.427688422  |
| ENSORLG00000005485  | -             | -                                                                                                                                                       | -5.33544721  | 1.242242793  | 6.715244825 | 0.138040661  |
| ENSORLG00000004120  | -             | -                                                                                                                                                       | -4.124542024 | -0.624726061 | 4.375946662 | 0.838263328  |
| ENSORLG00000000696  | -             | -                                                                                                                                                       | 0.90189598   | 2.24889487   | 3.378952414 | 1.352413526  |
| ENSORLG00000003545  | -             | cytochrome c oxidase protein 20 homolog [Source:NCBI;gene:Acc:101155137]                                                                                | -3.230814802 | 0.894212865  | 3.79504815  | -0.329494272 |
| ENSORLG00000010609  | -             | -                                                                                                                                                       | -5.10257063  | 0.339314298  | 4.97941878  | 0.130331893  |
| ENSORLG000000014870 | cep57l1       | centrosomal protein 57, like 1 [Source:ZFIN;Acc:ZDB-GENE-040808-27]                                                                                     | -4.108410223 | -0.147147099 | 4.304281727 | 0.342503319  |
| ENSORLG000000003279 | -             | -                                                                                                                                                       | -0.684935822 | 1.832777739  | 4.251670433 | 1.734442036  |
| ENSORLG00000012635  | si.ch211-39k3 | si.ch211-39k3.2 [Source:ZFIN;Acc:ZDB-GENE-070705-180]                                                                                                   | -3.444104673 | 0.128475506  | 4.641199611 | 1.069104352  |
| ENSORLG000000013102 | erh           | enhancer of rudimentary homolog (Drosophila) [Source:ZFIN;Acc:ZDB-GENE-090415-571]                                                                      | -2.547739894 | 1.878895863  | 5.140217435 | 0.714067314  |
| ENSORLG00000003980  | surf6         | surfact 6 [Source:ZFIN;Acc:ZDB-GENE-040426-1333]                                                                                                        | -2.633101159 | -0.04068463  | 3.62517466  | 1.03262477   |
| ENSORLG00000010552  | smn1          | survival of motor neuron 1, telomeric [Source:ZFIN;Acc:ZDB-GENE-090715-16]                                                                              | -3.28232611  | -0.04491632  | 3.377671887 | 0.140737098  |
| ENSORLG00000002509  | polb          | DNA polymerase beta [Source:NCBI;gene:Acc:101171171]                                                                                                    | -2.46063483  | 2.350328424  | 5.05945036  | 0.248973153  |
| ENSORLG000000018035 | rhov          | ras homolog family member V [Source:NCBI;gene:Acc:101188050]                                                                                            | -2.005001399 | -0.070410398 | 3.769885602 | 1.835779596  |
| ENSORLG00000017561  | hnmpa3        | heterogeneous nuclear ribonucleoprotein A3 [Source:ZFIN;Acc:ZDB-GENE-060224-11]                                                                         | -1.594490632 | 0.936303136  | 3.396084308 | 1.40575285   |
| ENSORLG00000009041  | -             | -                                                                                                                                                       | -5.194516478 | 1.645761961  | 5.253091615 | -1.588701238 |
| ENSORLG00000009352  | mindy3        | MINDY lysine 48 deubiquitinase 3 [Source:ZFIN;Acc:ZDB-GENE-061110-13]                                                                                   | -3.045780381 | 0.084161764  | 4.971539351 | 1.842082327  |
| ENSORLG00000006237  | apix          | actinin [Source:NCBI;gene:Acc:101162025]                                                                                                                | -1.437064338 | 0.996756047  | 4.214064252 | 1.790728908  |
| ENSORLG00000005866  | gaf2h3        | general transcription factor IIF, polypeptide 3 [Source:ZFIN;Acc:ZDB-GENE-040718-302]                                                                   | -2.826044069 | 0.608932037  | 3.254289203 | -0.280202252 |
| ENSORLG00000006774  | tbcb          | tubulin folding cofactor B [Source:ZFIN;Acc:ZDB-GENE-030131-9296]                                                                                       | -5.462229941 | 1.04610739   | 7.206284373 | 0.698362499  |
| ENSORLG000000004869 | snarca1a      | SWI/SNF-related, matrix-associated actin-dependent regulator of chromatin, subfamily a, containing DEAD/H box 1 a [Source:ZFIN;Acc:ZDB-GENE-050622-489] | -0.7626727   | 0.440127971  | 3.019005708 | 1.816690021  |
| ENSORLG000000061676 | rtf2          | replication termination factor 2 [Source:ZFIN;Acc:ZDB-GENE-030131-4825]                                                                                 | -2.731512875 | 1.029738572  | 5.560500007 | 1.799733577  |
| ENSORLG00000001308  | NDCCB2        | nucleobindin 2 [Source:HGNC;Symbol:Acc:HGNC:80048]                                                                                                      | -2.158565476 | -0.699224113 | 3.480239945 | 2.0233835    |
| ENSORLG00000006425  | -             | -                                                                                                                                                       | -2.315275164 | 1.99789082   | 6.780195537 | 2.477548561  |
| ENSORLG00000014924  | h3gal1a       | enhophilin A2 [Source:NCBI;gene:Acc:101161753]                                                                                                          | -1.267467968 | 0.364298105  | 3.271910563 | 1.640429335  |
| ENSORLG00000007823  | cyf5b         | cytochrome b5 [Source:NCBI;gene:Acc:101155998]                                                                                                          | -3.345407267 | 0.84491714   | 4.440764497 | 0.248505312  |
| ENSORLG00000016806  | -             | -                                                                                                                                                       | 0.16093937   | 0.77073644   | 3.064363154 | 2.455050614  |
| ENSORLG00000001887  | rs5b          | regulator of G protein signaling 5b [Source:ZFIN;Acc:ZDB-GENE-050417-359]                                                                               | -0.012540795 | 2.095430581  | 3.689395169 | 1.581910077  |
| ENSORLG00000007776  | stmate        | STM activating enhance [Source:ZFIN;Acc:ZDB-GENE-040426-1198]                                                                                           | -1.134640748 | 1.021065356  | 3.676224095 | 1.521003009  |
| ENSORLG000000004566 | -             | OTU deubiquitinase, ubiquitin aldehyde binding 2 [Source:NCBI;gene:Acc:101170908]                                                                       | -0.758144412 | 2.079226645  | 4.209143567 | 1.372257068  |
| ENSORLG000000012430 | churc1        | churchill domain containing 1 [Source:NCBI;gene:Acc:101169830]                                                                                          | -6.583393728 | 1.254262871  | 8.448534211 | 0.611361421  |
| ENSORLG00000011198  | casp8         | Oryzias latipes caspase-8 (casp8), mRNA [Source:RefSeq; mRNA:Acc:NM_001104788]                                                                          | -1.23796628  | 0.939311691  | 3.743752903 | 1.566960101  |
| ENSORLG000000007788 | -             | mediator complex subunit 26 [Source:NCBI;gene:Acc:101169339]                                                                                            | -3.649263023 | 0.868435855  | 5.155182303 | 0.63806144   |
| ENSORLG000000006871 | cuwdc2        | CUE domain containing 2 [Source:ZFIN;Acc:ZDB-GENE-030131-6283]                                                                                          | -0.102394548 | 1.339356252  | 3.592121709 | 2.150855516  |
| ENSORLG000000010951 | trove2        | TROVE domain family, member 2 [Source:ZFIN;Acc:ZDB-GENE-051113-300]                                                                                     | -2.083753402 | 0.250956014  | 3.169667458 | 0.835434002  |
| ENSORLG00000003065  | -             | -                                                                                                                                                       | -5.353101309 | 0.666844911  | 4.499040077 | -1.520376526 |
| ENSORLG000000008669 | s3gal3        | ST3 beta-galactosidase alpha 2-3-sialyltransferase 3 [Source:NCBI;gene:Acc:100048271]                                                                   | -0.41277524  | 1.210846924  | 3.35729075  | 1.734153717  |
| ENSORLG000000010589 | ccs84         | coiled-coil domain containing 84 [Source:ZFIN;Acc:ZDB-GENE-080529-1174]                                                                                 | -1.216561229 | 2.354555709  | 4.888977603 | 1.318345584  |
| ENSORLG000000014684 | noi12         | nucleolar protein 12 [Source:ZFIN;Acc:ZDB-GENE-040426-1035]                                                                                             | -5.603503032 | 2.384954716  | 4.305279512 | -3.682691849 |
| ENSORLG000000001012 | ptg1          | pituitary tumor-transforming 1 [Source:NCBI;gene:Acc:101159111]                                                                                         | -8.926557574 | 0.267358835  | 8.082143087 | -1.111288266 |
| ENSORLG000000012991 | lam8a1a       | family with sequence similarity 8, member A1a [Source:ZFIN;Acc:ZDB-GENE-141216-66]                                                                      | -0.702164749 | 1.019125515  | 3.573749642 | 1.852944349  |
| ENSORLG000000014184 | atps1b        | ATP synthase 1 [Source:NCBI;gene:Acc:101165095]                                                                                                         | -2.551898782 | -0.881298097 | 3.057938433 | 0.887827538  |
| ENSORLG000000003623 | birc5a        | baculoviral IAP repeat-containing protein 5.2 [Source:NCBI;gene:Acc:101155061]                                                                          | -1.53243842  | 0.561356794  | 3.78497231  | 1.691620277  |
| ENSORLG000000014347 | mecc          | mitochondrial trans-2-enoyl-CoA reductase [Source:ZFIN;Acc:ZDB-GENE-050417-389]                                                                         | -2.865148907 | -0.103434854 | 3.406675133 | 0.64544623   |
| ENSORLG000000003830 | -             | gap junction beta-6 protein-like [Source:NCBI;gene:Acc:101165708]                                                                                       | -2.041798556 | 0.006844919  | 3.204842709 | 1.15668357   |
| ENSORLG00000001189  | -             | -                                                                                                                                                       | -0.780873015 | 1.439462132  | 4.076938587 | 1.857088927  |
| ENSORLG000000013826 | -             | -                                                                                                                                                       | -5.462413399 | 0.779206169  | 5.494535695 | -0.746611732 |
| ENSORLG000000008977 | kbp4          | FK506 binding protein 4 [Source:ZFIN;Acc:ZDB-GENE-030131-514]                                                                                           | -2.705385271 | 0.718664536  | 5.9310236   | 2.50745887   |

|                      |                 |                                                                                                                                                     |              |              |             |              |
|----------------------|-----------------|-----------------------------------------------------------------------------------------------------------------------------------------------------|--------------|--------------|-------------|--------------|
| ENSRGLG00000008266   | zpc162879       | zpc162879 [Source:ZFIN;Acc:ZDB-GENE-070424-92]                                                                                                      | -2.286620065 | -0.197762284 | 4.961503193 | 2.873130319  |
| ENSRGLG00000017612   | higd1a          | HIG1 hypoxia inducible domain family member 1A [Source:ZFIN;Acc:ZDB-GENE-030826-15]                                                                 | -2.047173215 | 1.878897945  | 3.246050936 | -0.67953501  |
| ENSRGLG00000001806   | -               | -                                                                                                                                                   | -2.854559101 | 0.714607847  | 4.405180056 | 0.836497759  |
| ENSRGLG00000002086   | -               | -                                                                                                                                                   | -2.754272533 | 0.756628619  | 3.624688105 | 0.113102036  |
| ENSRGLG00000003241   | -               | -                                                                                                                                                   | 0.030382911  | 0.815811154  | 3.185019177 | 2.572269331  |
| ENSRGLG00000004706   | bndc17          | thioredoxin domain containing 17 [Source:NCBI gene:Acc:101163188]                                                                                   | -4.266105383 | 2.225371642  | 5.379858717 | -1.11113327  |
| ENSRGLG00000000910   | cox7c           | cytochrome c oxidase, subunit VIIc [Source:ZFIN;Acc:ZDB-GENE-030131-8062]                                                                           | -3.088687254 | 1.676525451  | 5.34423678  | 0.579278972  |
| ENSRGLG00000006329   | -               | -                                                                                                                                                   | -5.07335438  | -0.109682769 | 5.28357845  | -0.679607708 |
| ENSRGLG000000017679  | BRMS1L (1 of 4) | breast cancer metastasis-suppressor 1 like [Source:HGNC;Symbol:Acc:HGNC:20512]                                                                      | -2.405887235 | 0.238428258  | 3.476980416 | 0.833149874  |
| ENSRGLG000000011487  | efsa2 (1 of 4)  | eukaryotic translation initiation factor 5A-1 [Source:NCBI gene:Acc:101166426]                                                                      | -1.240496163 | 0.464616099  | 3.215539965 | 1.510912713  |
| ENSRGLG000000016404  | -               | -                                                                                                                                                   | -3.533667894 | 1.049863835  | 5.077480894 | 0.494418888  |
| ENSRGLG000000007116  | rad18           | RAD18 E3 ubiquitin protein ligase [Source:ZFIN;Acc:ZDB-GENE-040426-745]                                                                             | -3.603209153 | -0.0947212   | 4.293021597 | 0.7850188    |
| ENSRGLG000000012615  | yps28           | YPS28, ESCRT 1 subunit [Source:NCBI gene:Acc:101164188]                                                                                             | -2.360391284 | 2.213912004  | 6.240864168 | 1.667045473  |
| ENSRGLG000000016773  | -               | -                                                                                                                                                   | -2.565152027 | 0.106981741  | 3.87030049  | 1.198651748  |
| ENSRGLG000000005437  | bora            | bora, aurora kinase A activator [Source:ZFIN;Acc:ZDB-GENE-041114-165]                                                                               | -2.625219392 | -0.243877485 | 3.399382552 | 1.018255558  |
| ENSRGLG000000012689  | mtorf3          | mitochondrial transcription termination factor 3 [Source:ZFIN;Acc:ZDB-GENE-040718-359]                                                              | -3.799622676 | 1.168929142  | 3.999932225 | -0.96807345  |
| ENSRGLG000000010947  | -               | -                                                                                                                                                   | -4.407977009 | -0.071653983 | 6.085718245 | 1.749929731  |
| ENSRGLG000000090308  | zpc158254       | zpc158254 [Source:ZFIN;Acc:ZDB-GENE-070112-2222]                                                                                                    | 0.540257133  | 0.613761799  | 3.004853544 | 2.93163583   |
| ENSRGLG000000004479  | mbx             | MLX, MAX dimerization protein [Source:ZFIN;Acc:ZDB-GENE-050222-316]                                                                                 | 0.914118217  | 1.991097299  | 3.701945213 | 2.625451011  |
| ENSRGLG00000007217   | In3krp          | inositol kinase-3 kinase [Source:NCBI gene:Acc:101163919]                                                                                           | -2.992084704 | 0.177037245  | 4.049163852 | 0.886527149  |
| ENSRGLG00000004759   | -               | -                                                                                                                                                   | -4.650239842 | 2.735452147  | 5.833187575 | -1.552021315 |
| ENSRGLG000000015819  | scnm1           | sodium channel modifier 1 [Source:ZFIN;Acc:ZDB-GENE-030131-415]                                                                                     | -4.351193756 | 0.199759794  | 4.567919389 | 0.01745041   |
| ENSRGLG000000015951  | -               | -                                                                                                                                                   | 0.10190785   | 0.623194701  | 3.089854455 | 2.569052397  |
| ENSRGLG000000006889  | piap            | phosphatidylinositol glycan anchor biosynthesis class P [Source:NCBI gene:Acc:101157891]                                                            | -4.163596122 | 2.52244235   | 6.621640556 | -0.063900899 |
| ENSRGLG000000008289  | tmem107         | transmembrane protein 107 [Source:ZFIN;Acc:ZDB-GENE-040426-2294]                                                                                    | -2.612411433 | 0.297827788  | 4.183011562 | 1.273302277  |
| ENSRGLG00000009202   | dic3e4          | dic3e4 [Source:ZFIN;Acc:ZDB-GENE-050417-407]                                                                                                        | -1.391390819 | -0.16324886  | 3.107761539 | 1.880104243  |
| ENSRGLG000000016304  | -               | -                                                                                                                                                   | -17.36947262 | 0.790613657  | 17.89632582 | -0.263248981 |
| ENSRGLG000000011061  | efcab2          | EF-hand calcium binding domain 2 [Source:ZFIN;Acc:ZDB-GENE-070521-5]                                                                                | -5.938839128 | 1.400538041  | 8.499299702 | 1.160407762  |
| ENSRGLG000000011222  | -               | -                                                                                                                                                   | -2.812828246 | 0.857132308  | 5.05499611  | 1.385521468  |
| ENSRGLG000000005384  | arpp19b         | cAMP-regulated phosphoprotein 19b [Source:ZFIN;Acc:ZDB-GENE-040426-930]                                                                             | -0.299999053 | 0.589942521  | 3.172830894 | 2.287374342  |
| ENSRGLG000000011798  | -               | -                                                                                                                                                   | -1.390990076 | -0.279602893 | 3.623196138 | 2.512393919  |
| ENSRGLG00000007041   | asf1ba          | histone chaperone asf1b [Source:NCBI gene:Acc:101163979]                                                                                            | -4.468171993 | -0.018238645 | 4.970886136 | 0.521437899  |
| ENSRGLG000000016505  | itppl1          | TATA-box binding protein like 1 [Source:NCBI gene:Acc:101172784]                                                                                    | 0.185378396  | 1.007980498  | 3.046596802 | 2.224475091  |
| ENSRGLG00000006641   | si:dkey-210j14  | si:dkey-210j14.3 [Source:ZFIN;Acc:ZDB-GENE-131121-88]                                                                                               | -3.347788031 | 0.759175178  | 3.226654708 | -0.873823208 |
| ENSRGLG000000008295  | bcap29          | B cell receptor associated protein 29 [Source:NCBI gene:Acc:101172971]                                                                              | -1.270816986 | 0.865308543  | 3.964676599 | 1.829306033  |
| ENSRGLG000000008131  | zmat5           | zinc finger matrin-type 5 [Source:NCBI gene:Acc:101165408]                                                                                          | -4.094515235 | 1.169379299  | 4.78960112  | -0.473808431 |
| ENSRGLG000000015921  | -               | -                                                                                                                                                   | -5.310208896 | 0.585487885  | 5.225797169 | -0.669414306 |
| ENSRGLG000000002351  | cops2           | COP9 signalosome subunit 2 [Source:ZFIN;Acc:ZDB-GENE-040625-15]                                                                                     | -6.387802188 | 2.366900522  | 8.973516339 | 0.21929869   |
| ENSRGLG000000005638  | -               | -                                                                                                                                                   | -5.643619378 | 0.078390755  | 4.544630463 | -1.176894614 |
| ENSRGLG000000009334  | PIN1            | peptidyl/prolyl cis/trans isomerase, NIMA-interacting 1 [Source:HGNC;Symbol:Acc:HGNC:8988]                                                          | -1.884128059 | -0.046659639 | 3.400041223 | 1.563057777  |
| ENSRGLG000000012772  | ND3             | NADH dehydrogenase subunit 3 [Source:NCBI gene:Acc:R054391]                                                                                         | -1.338170497 | 1.245086515  | 5.123848114 | 2.541077095  |
| ENSRGLG000000017886  | -               | -                                                                                                                                                   | -4.121502995 | 0.139239884  | 4.599813388 | 0.343327477  |
| ENSRGLG000000010867  | -               | -                                                                                                                                                   | -0.881733471 | 0.455921502  | 3.014888859 | 1.876897056  |
| ENSRGLG000000008894  | tpst2           | tubulin polyglutamylation complex subunit 2 [Source:NCBI gene:Acc:101166689]                                                                        | -1.555267561 | -0.292292125 | 3.034167631 | 1.708676984  |
| ENSRGLG000000001042  | -               | -                                                                                                                                                   | 14.15961594  | 15.07844397  | 3.247586538 | 7.320704992  |
| ENSRGLG000000011305  | -               | -                                                                                                                                                   | -7.277335004 | -0.581857077 | 3.063744349 | -3.831248282 |
| ENSRGLG000000010099  | -               | -                                                                                                                                                   | -0.276886501 | 1.886936756  | 3.280946658 | 1.121656291  |
| ENSRGLG000000009231  | MSRB1 (1 of 4)  | methionine sulfoxide reductase B1 [Source:HGNC;Symbol:Acc:HGNC:14133]                                                                               | -0.223372153 | 0.935538863  | 3.60897545  | 2.448471437  |
| ENSRGLG000000013152  | -               | -                                                                                                                                                   | -1.275045166 | 0.831431549  | 3.99914017  | 1.893148715  |
| ENSRGLG000000005653  | PRC1            | protein regulator of cytokinesis 1 [Source:HGNC;Symbol:Acc:HGNC:3941]                                                                               | -2.053990198 | -0.008157676 | 3.486516314 | 1.441168753  |
| ENSRGLG000000004972  | ctbx3a          | chromobox homolog 3a (HP1 gamma homolog, Drosophila) [Source:ZFIN;Acc:ZDB-GENE-030131-1158]                                                         | -1.993785685 | 0.26116031   | 4.047655608 | 1.793194434  |
| ENSRGLG000000043395  | -               | -                                                                                                                                                   | -5.798202634 | 0.546199644  | 6.983896419 | 0.63997958   |
| ENSRGLG000000008743  | -               | -                                                                                                                                                   | -1.805620382 | -0.120849505 | 3.379148188 | 1.694962013  |
| ENSRGLG000000009030  | rab6a           | RAB6A, member RAS oncogene family [Source:NCBI gene:Acc:101163015]                                                                                  | -0.374204806 | 1.263847948  | 3.219256115 | 1.581688414  |
| ENSRGLG000000015773  | apm1aa          | protein phosphatase, Mg <sup>2+</sup> /Mn <sup>2+</sup> dependent, 1Aa [Source:ZFIN;Acc:ZDB-GENE-991102-15]                                         | -1.049434887 | 1.07709902   | 3.281244889 | 1.155198845  |
| ENSRGLG000000011795  | HIST1H4D        | histone H4 [Source:NCBI gene:Acc:101170364]                                                                                                         | 2.61931013   | 3.483685858  | 3.604254377 | 2.740363372  |
| ENSRGLG000000005753  | rik             | ribokinase kinase [Source:ZFIN;Acc:ZDB-GENE-081104-321]                                                                                             | -2.394300398 | 0.869322689  | 3.904847361 | 0.641709033  |
| ENSRGLG000000021536  | Rf00443         | small nucleolar RNA, H/ACA box 27 [Source:HGNC;Symbol:Acc:HGNC:32617]                                                                               | -8.57561382  | 1.326298027  | 12.65252786 | 2.751105745  |
| ENSRGLG0000000013085 | dpcr6           | DiGeorge syndrome critical region gene 6 [Source:ZFIN;Acc:ZDB-GENE-040912-125]                                                                      | -6.418017847 | 2.472987565  | 8.036283882 | -0.852234355 |
| ENSRGLG000000011850  | maseh2b         | maseh2b [Source:ZFIN;Acc:ZDB-GENE-040426-1090]                                                                                                      | -1.917915773 | 0.097788897  | 3.773666572 | 1.758446547  |
| ENSRGLG000000005873  | RFESD (1 of 4)  | Rieske Fe-S domain containing [Source:HGNC;Symbol:Acc:HGNC:29567]                                                                                   | -2.068264851 | 0.082938787  | 4.338899921 | 2.186181068  |
| ENSRGLG000000005429  | nae1            | neuraminidase E1 subunit 1 [Source:ZFIN;Acc:ZDB-GENE-040426-1552]                                                                                   | -2.051021888 | 0.39873815   | 3.821757403 | 1.3724824    |
| ENSRGLG000000001867  | pdcd11          | PDZ domain containing 11 [Source:ZFIN;Acc:ZDB-GENE-040426-2544]                                                                                     | -1.309974946 | -0.160839547 | 3.412795157 | 2.264140033  |
| ENSRGLG0000000002285 | snap29          | synaptosomal-associated protein 29 [Source:ZFIN;Acc:ZDB-GENE-041111-226]                                                                            | -1.590476203 | 0.434006819  | 3.17128231  | 1.687284248  |
| ENSRGLG000000013500  | mrpl42          | mitochondrial ribosomal protein L42 [Source:ZFIN;Acc:ZDB-GENE-101014-1]                                                                             | -7.249400904 | -0.728804617 | 5.830011071 | -0.690100055 |
| ENSRGLG000000013567  | -               | -                                                                                                                                                   | -0.833955622 | 1.327681446  | 4.033352705 | 1.872008286  |
| ENSRGLG000000007506  | tpag1           | dolichyl phosphate (UDP-N-acetylglucosamine) N-acetylglucosaminophosphotransferase 1 (GlcNAc-1-P transferase) [Source:ZFIN;Acc:ZDB-GENE-050309-181] | -2.894124831 | -0.737082444 | 3.518498085 | 1.361940457  |
| ENSRGLG000000000276  | -               | -                                                                                                                                                   | -0.470308988 | 0.970104834  | 3.711982117 | 2.22028312   |
| ENSRGLG000000009641  | zpc171566       | zpc171566 [Source:ZFIN;Acc:ZDB-GENE-050309-193]                                                                                                     | -5.249898963 | 0.838713808  | 6.32602453  | 0.23887899   |
| ENSRGLG000000010444  | -               | -                                                                                                                                                   | -0.230604253 | 2.619850268  | 4.255999426 | 1.406029916  |
| ENSRGLG000000009961  | skp1            | S-phase kinase associated protein 1 [Source:NCBI gene:Acc:101175667]                                                                                | -2.697687497 | 0.031748491  | 4.269075822 | 1.540124802  |
| ENSRGLG000000012239  | nek2            | NIMA-related kinase 2 [Source:ZFIN;Acc:ZDB-GENE-040426-752]                                                                                         | -2.114506173 | 0.259459727  | 4.113101443 | 1.739620525  |
| ENSRGLG000000002415  | -               | -                                                                                                                                                   | -1.347920524 | 2.281368064  | 3.018889411 | -0.609913497 |

|  |                     |                  |                                                                                                              |               |              |              |              |
|--|---------------------|------------------|--------------------------------------------------------------------------------------------------------------|---------------|--------------|--------------|--------------|
|  | ENSRGLG00000021323  | RF00026          | U6 scilicosomal RNA [Source:NCBI]                                                                            | 5.797901288   | 7.69686026   | 4.273424507  | 2.374988824  |
|  | ENSRGLG00000002575  | casp9            | caspace 9, apoptosis-related cysteine peptidase [Source:ZFIN;Acc:ZDB-GENE-030825-5]                          | -2.062289205  | 0.068001997  | 3.028742799  | 0.899936285  |
|  | ENSRGLG00000000166  | -                | -                                                                                                            | -2.552939471  | -0.540080631 | 3.837207112  | 1.82483961   |
|  | ENSRGLG00000004394  | rab34a           | RAB34, member RAS oncogene family a [Source:ZFIN;Acc:ZDB-GENE-041010-197]                                    | -0.5439456    | 0.331252239  | 3.011087061  | 2.325374276  |
|  | ENSRGLG000000014310 | medi10           | mediator complex subunit 10 [Source:NCBI gene:Acc:101156263]                                                 | -2.281949197  | 0.670602643  | 3.434200679  | 0.482133561  |
|  | ENSRGLG000000007844 | uchl1            | ubiquitin carboxyl-terminal esterase L1 (ubiquitin thiolesterase) [Source:ZFIN;Acc:ZDB-GENE-0301131-3844]    | -4.34847434   | 0.109578916  | 3.066396865  | -1.391199656 |
|  | ENSRGLG00000005718  | -                | -                                                                                                            | -2.314172503  | 0.911596049  | 3.542072932  | 0.316789844  |
|  | ENSRGLG000000017573 | hwt1             | nucleoredox like 1 [Source:ZFIN;Acc:ZDB-GENE-070424-115]                                                     | -11.21231398  | 3.337042525  | 16.52323144  | 1.974365165  |
|  | ENSRGLG000000008157 | psmd6            | proteasome 26S subunit, non-ATPase 6 [Source:NCBI gene:Acc:101172070]                                        | -2.460725997  | -0.407062091 | 3.61849877   | 1.565318061  |
|  | ENSRGLG000000006872 | zgc-56095        | ferritin, heavy subunit [Source:NCBI]                                                                        | -3.482325621  | 1.658484438  | 3.674133819  | -1.46619142  |
|  | ENSRGLG000000000872 | -                | -                                                                                                            | 0.149172625   | 2.12331033   | 3.597595495  | 1.623947607  |
|  | ENSRGLG000000016225 | eroc1            | excision repair cross-complementation group 1 [Source:ZFIN;Acc:ZDB-GENE-040426-2806]                         | -5.055938166  | 1.11616255   | 6.547520272  | 0.376366256  |
|  | ENSRGLG000000003582 | medi3a           | mediator complex subunit 19 [Source:NCBI gene:Acc:101157547]                                                 | -1.989216638  | -0.25686174  | 3.106801039  | 1.374931222  |
|  | ENSRGLG000000004389 | sod1             | superoxide dismutase 1 [Source:NCBI gene:Acc:101170534]                                                      | -0.813356796  | 0.597185094  | 3.05041375   | 1.640356693  |
|  | ENSRGLG000000007204 | arl16            | ADP ribosylation factor like G1Pase 16 [Source:NCBI gene:Acc:101169134]                                      | -6.156613057  | 1.022191395  | 7.729515241  | 0.552193257  |
|  | ENSRGLG000000006904 | rexo4            | REX4 homolog, 3'-5' exonuclease [Source:ZFIN;Acc:ZDB-GENE-050411-124]                                        | -2.42781633   | 0.202556535  | 3.064666577  | 0.434778358  |
|  | ENSRGLG000000010034 | ear2             | ELL-associated factor 2 [Source:NCBI gene:Acc:101154988]                                                     | -1.064030334  | 0.081229994  | 3.246245852  | 2.101470364  |
|  | ENSRGLG000000006992 | -                | -                                                                                                            | -3.338313368  | -0.182366768 | 3.269959224  | 0.114500301  |
|  | ENSRGLG000000014026 | tusc3            | tumor suppressor candidate 3 [Source:NCBI gene:Acc:101168184]                                                | -3.317643446  | 0.515058163  | 4.600234194  | 0.768017248  |
|  | ENSRGLG000000009817 | slc50a1 (1 of 2) | solute carrier family 5 (sugar efflux transporter), member 1 [Source:ZFIN;Acc:ZDB-GENE-050220-111]           | 0.469415031   | 1.371616459  | 3.060504836  | 2.158788405  |
|  | ENSRGLG000000006244 | ef3b             | eukaryotic translation initiation factor 3, subunit B [Source:ZFIN;Acc:ZDB-GENE-040426-2900]                 | -3.866562526  | 0.895546973  | 4.91915607   | 0.158441399  |
|  | ENSRGLG000000016539 | ttf5             | tubulin tyrosine ligase-like family, member 5 [Source:ZFIN;Acc:ZDB-GENE-100922-288]                          | -2.419315087  | -0.272088236 | 3.159576471  | 1.012834755  |
|  | ENSRGLG000000003409 | AP3S1            | adaptor related protein complex 3 subunit sigma 1 [Source:NCBI gene:Acc:101158362]                           | -2.034859864  | 1.520430979  | 3.422560369  | -0.132245794 |
|  | ENSRGLG000000010665 | ps19bp1          | ribosomal protein S19 binding protein 1 [Source:NCBI gene:Acc:101172879]                                     | -2.207905446  | 0.630132114  | 3.281904276  | 0.444351682  |
|  | ENSRGLG000000009347 | -                | -                                                                                                            | -3.781728324  | 0.769487901  | 5.414181782  | 0.863453853  |
|  | ENSRGLG000000006615 | -                | -                                                                                                            | -4.148138985  | 0.751638965  | 4.871638965  | -0.021732751 |
|  | ENSRGLG000000008817 | -                | -                                                                                                            | -3.154102839  | 1.830482022  | 6.451401847  | 1.467302767  |
|  | ENSRGLG000000016436 | sh3bgr2          | SH3 domain binding glutamate-rich protein like 2 [Source:ZFIN;Acc:ZDB-GENE-040704-38]                        | -2.478744847  | 1.151635273  | 3.693485991  | 0.063591564  |
|  | ENSRGLG000000009337 | UBL5             | ubiquitin like 5 [Source:HGNC;Symbol:Acc:HGNC:13738]                                                         | -4.788578985  | 1.229220539  | 6.312676767  | 0.295362337  |
|  | ENSRGLG000000005790 | MME              | membrane metalloendopeptidase [Source:HGNC;Symbol:Acc:HGNC:7154]                                             | -6.419057143  | -0.395196817 | 3.027981449  | -2.99539399  |
|  | ENSRGLG000000008529 | znf280d          | zinc finger protein 280D [Source:ZFIN;Acc:ZDB-GENE-030131-2260]                                              | -1.62017949   | 0.298745056  | 3.148974175  | 1.230534348  |
|  | ENSRGLG000000014824 | mmps10           | mitochondrial ribosomal protein S10 [Source:ZFIN;Acc:ZDB-GENE-040914-39]                                     | -3.887032886  | 0.730902918  | 5.012004185  | 0.394553458  |
|  | ENSRGLG000000017525 | hsp90aa1.1       | heat shock protein HSP 90-alpha 1 [Source:NCBI gene:Acc:101169258]                                           | -1.813166676  | 0.617346302  | 3.307216785  | 0.877188192  |
|  | ENSRGLG000000002097 | -                | -                                                                                                            | -2.780813613  | 1.991284497  | 6.80859187   | 2.03697944   |
|  | ENSRGLG00000001862  | -                | -                                                                                                            | -0.62385852   | 1.888816978  | 3.221360197  | 0.79907215   |
|  | ENSRGLG000000004948 | -                | -                                                                                                            | -1.849347196  | 0.84474222   | 4.04321301   | 3.25971947   |
|  | ENSRGLG000000005351 | -                | -                                                                                                            | -1.748984274  | -0.251423144 | 16.142142954 | -0.104289650 |
|  | ENSRGLG000000015326 | ker1a            | keratinocyte [Source:ZFIN;Acc:ZDB-GENE-041210-165]                                                           | -0.147468781  | 2.032865748  | 4.991857243  | 2.812005513  |
|  | ENSRGLG000000008750 | stk19            | serine/threonine kinase 19 [Source:ZFIN;Acc:ZDB-GENE-000616-11]                                              | -2.603396666  | 0.915854851  | 5.058274896  | 1.539500668  |
|  | ENSRGLG000000012253 | si.ch211-22.13   | pre-mRNA-splicing factor CWC22 homolog [Source:NCBI gene:Acc:101168832]                                      | -3.973921999  | 1.094976555  | 4.19665809   | -0.871755535 |
|  | ENSRGLG000000013915 | brdt             | bromodomain, testis-specific [Source:ZFIN;Acc:ZDB-GENE-030131-5928]                                          | -2.040165992  | 0.475984277  | 4.351843939  | 1.83617838   |
|  | ENSRGLG000000003918 | slc35d2          | solute carrier family 35 (UDP-GlcNAc/UDP-glucose transporter), member D2 [Source:ZFIN;Acc:ZDB-GENE-080125-1] | -1.541002145  | 0.527310329  | 4.2232102    | 2.155382717  |
|  | ENSRGLG000000012406 | -                | -                                                                                                            | 0             | 13.71371837  | 15.61639808  | 1.903152842  |
|  | ENSRGLG000000021531 | RF00089          | small nuclear RNA SNORD31 [Source:NCBI gene:Acc:11946359]                                                    | -13.78312921  | 2.712440177  | 16.40599203  | -0.089087474 |
|  | ENSRGLG000000013031 | -                | -                                                                                                            | -3.858668406  | -0.053805004 | 6.003865365  | 2.199491341  |
|  | ENSRGLG000000008087 | brd9             | bromodomain containing 9 [Source:ZFIN;Acc:ZDB-GENE-080502-1]                                                 | -1.824940241  | 0.157685395  | 3.855593564  | 1.873453007  |
|  | ENSRGLG000000006988 | -                | -                                                                                                            | -3.540274693  | 0.993817563  | 4.261471502  | -0.272134342 |
|  | ENSRGLG000000008049 | casp3a           | caspace 3B [Source:NCBI gene:Acc:100049265]                                                                  | -1.573446205  | 0.816564769  | 3.085356541  | 0.695350345  |
|  | ENSRGLG000000004016 | -                | -                                                                                                            | -9.73485882   | 5.44370707   | 17.11039978  | 1.933303075  |
|  | ENSRGLG000000010111 | plod2            | procollagen-lysine, 2-oxoglutarate 5-dioxygenase 2 [Source:ZFIN;Acc:ZDB-GENE-070326-1]                       | -0.714223597  | 2.923851162  | 3.002590543  | -0.635000766 |
|  | ENSRGLG000000001671 | lxd1             | KDEL motif containing 1 [Source:NCBI gene:Acc:101163487]                                                     | -3.509159107  | 0.460656443  | 4.299631773  | 0.330300973  |
|  | ENSRGLG000000011097 | supt4h1          | SPT4 homolog, DSIF elongation factor subunit [Source:NCBI gene:Acc:101165335]                                | -5.089388494  | 0.450240917  | 7.347587214  | 1.808442628  |
|  | ENSRGLG000000007575 | bxn              | thymidylate synthase [Source:NCBI gene:Acc:101173415]                                                        | -2.794815904  | 1.178432581  | 5.263849121  | 0.713820861  |
|  | ENSRGLG000000006183 | -                | -                                                                                                            | 0.304727292   | 1.507311219  | 3.886447664  | 2.684047684  |
|  | ENSRGLG000000012507 | carntm1          | carnosine N-methyltransferase 1 [Source:NCBI gene:Acc:101159445]                                             | -4.560403638  | 0.768351476  | 3.942107494  | -1.386163421 |
|  | ENSRGLG000000013156 | -                | -                                                                                                            | -6.203693825  | 0.284532828  | 3.524077559  | -2.963662365 |
|  | ENSRGLG000000015666 | rheb1            | GTP-binding protein Rheb [Source:NCBI gene:Acc:101166653]                                                    | -0.956076286  | 0.911735977  | 3.1291136    | 1.261786304  |
|  | ENSRGLG000000013684 | zgc-92287        | zgc-92287 [Source:ZFIN;Acc:ZDB-GENE-040718-350]                                                              | -7.823155989  | 0.811493647  | 4.699039797  | -3.935070769 |
|  | ENSRGLG000000007422 | -                | -                                                                                                            | -3.168750043  | -0.748545545 | 3.240618288  | 0.820893144  |
|  | ENSRGLG000000009068 | -                | -                                                                                                            | -1.820389778  | 1.286868026  | 3.836707589  | 0.558589791  |
|  | ENSRGLG000000009989 | -                | -                                                                                                            | -0.33462297   | 2.574675049  | 4.11951121   | 1.810688222  |
|  | ENSRGLG000000008022 | -                | -                                                                                                            | -6.1672008437 | 1.148819143  | 6.669181416  | -0.646356035 |
|  | ENSRGLG000000008042 | -                | -                                                                                                            | -2.940826036  | -0.271120717 | 3.007160918  | 0.338545421  |
|  | ENSRGLG000000014793 | -                | -                                                                                                            | -3.002115446  | 0.109692684  | 4.271765317  | 1.186268065  |
|  | ENSRGLG000000007057 | nsa10            | N(alpha)-acetyltransferase 10, NAtA catalytic subunit [Source:NCBI gene:Acc:101165304]                       | -1.830488013  | 0.454048724  | 3.539776975  | 1.257252324  |
|  | ENSRGLG000000009535 | -                | -                                                                                                            | -7.588637543  | 0.684817012  | 4.5456003978 | -3.727370268 |
|  | ENSRGLG000000003718 | tusc2a           | tumor suppressor 2, mitochondrial calcium regulator [Source:NCBI gene:Acc:101169352]                         | -3.584942537  | -0.535509032 | 4.066739636  | 1.011791611  |
|  | ENSRGLG000000015096 | -                | -                                                                                                            | -2.915515358  | 0.635813311  | 4.398813025  | 0.84790740   |
|  | ENSRGLG000000009179 | fucm             | fucose mutarotase [Source:NCBI gene:Acc:101170455]                                                           | -18.57850375  | -0.607762923 | 17.91177869  | 1.941028022  |
|  | ENSRGLG000000006166 | elp5             | elongator acetyltransferase complex subunit 5 [Source:ZFIN;Acc:ZDB-GENE-061215-33]                           | -4.662021904  | 0.253598502  | 4.622404292  | -0.292731319 |
|  | ENSRGLG000000003200 | atpaf2           | ATP synthase mitochondrial F1 complex assembly factor 2 [Source:NCBI gene:Acc:101173178]                     | -3.059820767  | 0.461675223  | 3.69629266   | 0.175281668  |
|  | ENSRGLG000000006638 | pgfs             | 6-phosphogluconolactonase [Source:NCBI gene:Acc:101169968]                                                   | -1.648804237  | 0.613858148  | 4.24083161   | 1.978653801  |
|  | ENSRGLG000000006912 | ap2s1            | adaptor-related protein complex 2, sigma 1 subunit [Source:ZFIN;Acc:ZDB-GENE-040426-2174]                    | -3.848475918  | 1.293853013  | 6.135862082  | 0.994017851  |

|                     |                 |                                                                                                          |              |              |             |              |
|---------------------|-----------------|----------------------------------------------------------------------------------------------------------|--------------|--------------|-------------|--------------|
| ENSRORG0000011191   | hirp3           | HIRA interacting protein 3 [Source:ZFIN;Acc:ZDB-GENE-030131-5753]                                        | -4.539177179 | 0.539036011  | 5.170444298 | 0.09271541   |
| ENSRORG0000011413   | vps25           | vesicular protein sorting 25 homolog (S. cerevisiae) [Source:ZFIN;Acc:ZDB-GENE-050506-30]                | -1.625246529 | 0.348416748  | 3.167335966 | 1.194157528  |
| ENSRORG0000000887   | trnsf2          | transmembrane 6 superfamily member 2 [Source:ZFIN;Acc:ZDB-GENE-050503-338]                               | -0.536071716 | 4.348806184  | 6.637641801 | 1.7523254738 |
| ENSRORG00000015648  | arfgap1         | ADP-ribosylation factor GTPase activating protein 1 [Source:ZFIN;Acc:ZDB-GENE-041114-130]                | -3.142125258 | 0.89863613   | 4.983848234 | 0.952317553  |
| ENSRORG00000003354  | psmd5           | proteasome 26S subunit, non-ATPase 5 [Source:ZFIN;Acc:ZDB-GENE-050417-28]                                | -3.921235809 | 0.9735476    | 3.96876611  | -0.925531935 |
| ENSRORG0000003332   | si:dyx-147f3    | si:dyx-147f3 4 [Source:ZFIN;Acc:ZDB-GENE-061009-081009]                                                  | -3.254132621 | 0.657387689  | 4.136963748 | 0.229480603  |
| ENSRORG0000013172   | thg1l           | thymine-guanine intercalating protein 1-like [Source:ZFIN;Acc:ZDB-GENE-041114-170]                       | -3.419286951 | 1.415449751  | 5.448164493 | 0.353911095  |
| ENSRORG0000007424   | thg1l           | tRNA-histidine guanylyltransferase 1-like [Source:ZFIN;Acc:ZDB-GENE-041114-170]                          | -3.731345236 | 0.499000394  | 3.739887886 | -0.499927824 |
| ENSRORG00000007890  | -               | -                                                                                                        | -2.610167775 | 0.92788378   | 3.188102338 | -0.349464296 |
| ENSRORG00000004465  | zsmc3p          | PSMC3 interacting protein [Source:ZFIN;Acc:ZDB-GENE-040625-125]                                          | -1.293760615 | 0.722603492  | 4.089695498 | 2.072816284  |
| ENSRORG0000010604   | ofdn6           | orfodin subunit 6 [Source:NCBI;gene:Acc:101164323]                                                       | -1.824248361 | 1.397115019  | 3.851855301 | 0.630979002  |
| ENSRORG0000015117   | odegpl1         | O-sialoglycoprotein endopeptidase-like 1 [Source:ZFIN;Acc:ZDB-GENE-030616-532]                           | -2.889794924 | 0.526372569  | 3.163257473 | -0.252424963 |
| ENSRORG0000001338   | zgc:103692      | zgc:103692 [Source:ZFIN;Acc:ZDB-GENE-041010-151]                                                         | -3.911043664 | 1.102416154  | 5.371324593 | 0.358349709  |
| ENSRORG0000017350   | -               | arvin repeat domain-containing protein 13c-like [Source:NCBI;gene:Acc:101171363]                         | -2.699199384 | 0.040796332  | 3.964936382 | 1.31542533   |
| ENSRORG00000008661  | rik2            | RIC kinase 2 (yeast) [Source:ZFIN;Acc:ZDB-GENE-040426-2913]                                              | -2.311400517 | -0.09387115  | 3.197002899 | 0.979958486  |
| ENSRORG00000009431  | mnd1            | meiotic nuclear divisions 1 homolog (S. cerevisiae) [Source:ZFIN;Acc:ZDB-GENE-040801-116]                | -1.855631355 | -0.017660508 | 4.054650159 | 2.217164173  |
| ENSRORG0000017529   | rsrp1           | arginine and serine rich protein 1 [Source:NCBI;gene:Acc:101160860]                                      | -2.016529964 | -0.028350562 | 3.235608078 | 1.247913618  |
| ENSRORG00000002741  | -               | leucine rich repeat containing 34 [Source:NCBI;gene:Acc:101152773]                                       | -1.928367595 | 1.045628495  | 3.042870958 | 0.069359643  |
| ENSRORG0000010115   | rab23           | RAB23, member RAS oncogene family [Source:NCBI;gene:Acc:101155630]                                       | 0.261994434  | 0.560900718  | 3.028866602 | 2.728445078  |
| ENSRORG00000007723  | tsr3            | TSK3, tsk transferase ribosome maturation factor [Source:NCBI;gene:Acc:101166503]                        | -3.906482057 | 1.887357303  | 4.191627303 | -1.601727362 |
| ENSRORG00000008321  | -               | -                                                                                                        | -3.142315641 | 2.034647643  | 4.719778865 | -0.456699338 |
| ENSRORG00000001864  | -               | -                                                                                                        | -6.543958181 | 0.494851947  | 7.396282444 | 0.357962378  |
| ENSRORG00000013648  | magoh           | protein mago nashi homolog [Source:NCBI;gene:Acc:101167611]                                              | -2.547214836 | 0.946961512  | 4.428092747 | 0.93440126   |
| ENSRORG00000004553  | chordc1b        | cysteine and histidine-rich domain (CHORD) containing 1b [Source:ZFIN;Acc:ZDB-GENE-040426-1288]          | -3.391809747 | 0.322764658  | 5.361937338 | 1.647848113  |
| ENSRORG00000000982  | apip            | APAF1 interacting protein [Source:NCBI;gene:Acc:101160223]                                               | -2.245377647 | 0.13074817   | 3.300528192 | 0.924887258  |
| ENSRORG00000008290  | cutc            | cutc copper transporter [Source:NCBI;gene:Acc:101163753]                                                 | -1.499990402 | 0.446825926  | 4.089992433 | 2.143660927  |
| ENSRORG00000007724  | -               | -                                                                                                        | -3.391816322 | -0.359475041 | 5.12008328  | 2.088227255  |
| ENSRORG00000015258  | zgc:56699       | gametocyte-specific factor 1 [Source:NCBI;gene:Acc:101173193]                                            | -5.279353882 | 0.728933566  | 5.757707676 | -0.250094941 |
| ENSRORG00000014486  | -               | -                                                                                                        | -3.207384895 | -0.697119764 | 3.763554511 | 1.253774631  |
| ENSRORG00000016544  | lam131a         | family with sequence similarity 131, member A [Source:ZFIN;Acc:ZDB-GENE-080204-112]                      | -5.807866588 | -0.173035322 | 3.688779281 | -1.945657552 |
| ENSRORG00000001004  | ndufa1          | NDUFA1, NADH dehydrogenase complex subunit 1 [Source:ZFIN;Acc:ZDB-GENE-040625-040625]                    | -1.449903785 | 0.684999607  | 3.780516719 | 1.646098179  |
| ENSRORG00000014337  | LGALS2          | galactose 2 [Source:HGNC;Symbol:Acc:HGNC:6582]                                                           | -15.83745382 | 1.684078766  | 16.4681002  | -1.194188971 |
| ENSRORG00000007711  | DPY19L4         | dpv-19 like 4 [Source:HGNC;Symbol:Acc:HGNC:27829]                                                        | -0.70023376  | 0.4318484    | 3.49971325  | 2.358320217  |
| ENSRORG00000007862  | trmt10b         | tRNA methyltransferase 10B [Source:ZFIN;Acc:ZDB-GENE-061013-313]                                         | -2.281332464 | 1.054905761  | 3.110894388 | -0.224858685 |
| ENSRORG00000015882  | si:ch211-1650   | si:ch211-1650f3 [Source:ZFIN;Acc:ZDB-GENE-131121-61]                                                     | -1.574115913 | -0.310340621 | 3.086850236 | 1.823560224  |
| ENSRORG00000000871  | plra4a          | glycine receptor, alpha 4a [Source:ZFIN;Acc:ZDB-GENE-010410-3]                                           | 1.157390098  | 1.665573183  | 3.246160504 | 2.73846379   |
| ENSRORG00000008002  | -               | -                                                                                                        | -1.728401126 | 1.066451508  | 4.867712314 | 2.07534273   |
| ENSRORG00000010263  | swi5            | SWI5 homologous recombination repair protein [Source:NCBI;gene:Acc:101158369]                            | -4.470470059 | 2.25259679   | 5.584512899 | -1.138068619 |
| ENSRORG000000010780 | si:zfos-1692f10 | protein CutA homolog [Source:NCBI;gene:Acc:101174485]                                                    | -2.191584317 | 1.245982815  | 5.246334451 | 1.809251982  |
| ENSRORG00000016092  | pfufut2         | protein O-fucosyltransferase 2 [Source:ZFIN;Acc:ZDB-GENE-030131-3595]                                    | -0.874332737 | -0.088445222 | 3.035667388 | 2.250164913  |
| ENSRORG00000009672  | si:zfos-911f5   | si:zfos-911f5 4 [Source:ZFIN;Acc:ZDB-GENE-130603-130603]                                                 | -1.829463248 | 0.704073168  | 3.003380742 | 0.467329064  |
| ENSRORG00000013562  | -               | -                                                                                                        | -2.649471733 | -0.321111949 | 3.836319063 | 1.508413904  |
| ENSRORG00000009124  | semp5           | SUMO specific peptidase 5 [Source:ZFIN;Acc:ZDB-GENE-050208-772]                                          | -1.992694347 | 0.683117624  | 3.37828507  | 0.702957826  |
| ENSRORG00000008457  | sgk3            | serum/glucocorticoid regulated kinase family member 3 [Source:ZFIN;Acc:ZDB-GENE-010424-62]               | 0.38014554   | 1.965434783  | 4.082044774 | 2.497240611  |
| ENSRORG00000007550  | -               | -                                                                                                        | -15.0470634  | 1.801582407  | 15.81331023 | -1.134845527 |
| ENSRORG00000009984  | cznh            | cytochrome H [Source:NCBI;gene:Acc:101159751]                                                            | -2.778912201 | 1.08096235   | 3.452874501 | -0.406515011 |
| ENSRORG00000009928  | mmp11           | inner mitochondrial membrane peptidase subunit 1 [Source:ZFIN;Acc:ZDB-GENE-070522-4]                     | -2.99544814  | 0.661749489  | 4.783166338 | 1.126393452  |
| ENSRORG00000004362  | mis18a          | MIS18 kinetochore protein A [Source:NCBI;gene:Acc:10110115]                                              | -1.295483368 | 0.282301769  | 4.424758927 | 2.6702889    |
| ENSRORG00000002032  | fbpa            | fibroblast growth factor (acidic) intracellular binding protein a [Source:ZFIN;Acc:ZDB-GENE-040426-1363] | -1.544965109 | 0.69983602   | 3.297065907 | 1.052702213  |
| ENSRORG00000014778  | -               | chromosome 7, C6orf226 homolog [Source:NCBI;gene:Acc:101170515]                                          | -0.763111889 | 1.215610491  | 3.597942354 | 1.619704886  |
| ENSRORG00000004354  | HAUS1           | HAUS augmin like complex subunit 1 [Source:NCBI;gene:Acc:101168976]                                      | -3.89919474  | 0.51270437   | 4.88430777  | 0.472893515  |
| ENSRORG00000007932  | cnr2            | neurocalin 2 [Source:ZFIN;Acc:ZDB-GENE-050706-050706]                                                    | -6.15271044  | 0.24684493   | 5.62582825  | -0.716487649 |
| ENSRORG00000009765  | bzip            | BRC2 and CDKN1A interacting protein [Source:NCBI;gene:Acc:101165354]                                     | -3.062515696 | 0.334576723  | 4.414084693 | 1.017477397  |
| ENSRORG00000003851  | -               | -                                                                                                        | -5.02828826  | 0.753413936  | 5.495714446 | -0.285508858 |
| ENSRORG00000002724  | ctd45           | CDC45 cell division cycle 45 homolog (S. cerevisiae) [Source:ZFIN;Acc:ZDB-GENE-040426-2710]              | -2.779765221 | -0.409529155 | 3.334118975 | 0.964367749  |
| ENSRORG00000013879  | yeats4          | YEATS domain containing 4 [Source:NCBI;gene:Acc:101163215]                                               | -4.670549279 | 1.559138018  | 5.066701147 | -1.142500974 |
| ENSRORG00000010467  | si:ch211-284f   | chromosome 17, C1orf123 homolog [Source:NCBI;gene:Acc:101155088]                                         | -1.421422674 | 0.670646386  | 3.089453044 | 0.997869077  |
| ENSRORG00000004351  | gp:slp1         | GRASP motifs containing 1 [Source:ZFIN;Acc:ZDB-GENE-040801-212]                                          | 1.27786641   | 2.512784456  | 3.604173853 | 2.36974078   |
| ENSRORG00000009826  | -               | -                                                                                                        | -1.73241617  | 0.963719811  | 3.957988244 | 1.272851875  |
| ENSRORG00000006305  | -               | -                                                                                                        | 0.68920152   | 2.384073939  | 3.543649413 | 1.84895402   |
| ENSRORG00000010271  | ktcb6b          | potassium channel tetramerization domain containing 6 [Source:NCBI;gene:Acc:101166793]                   | -2.162039043 | 0.28891062   | 3.487485333 | 1.037120717  |
| ENSRORG00000008828  | DDA1            | DDA1 and DDB1 associated 1 [Source:NCBI;gene:Acc:101171286]                                              | -2.746647713 | 0.809118895  | 4.202852471 | 0.647570722  |
| ENSRORG00000009402  | poc5            | POC5 centriolar protein homolog (Chlamydomonas) [Source:ZFIN;Acc:ZDB-GENE-060926-135]                    | -3.043193217 | -0.162596546 | 3.633841673 | 0.753729927  |
| ENSRORG00000015185  | tanqo2          | transport and pilin organization 2 homolog [Source:NCBI;gene:Acc:101156177]                              | -3.544662166 | 0.907276645  | 4.969453076 | 0.517999101  |
| ENSRORG00000008700  | kr5a            | kinesin family member 3A [Source:ZFIN;Acc:ZDB-GENE-050417-71]                                            | -0.68968781  | -0.030505837 | 3.566535163 | 2.907858544  |
| ENSRORG00000014309  | ra2             | redlication protein A2 [Source:NCBI;gene:Acc:101165354]                                                  | -1.45930368  | 0.308469819  | 3.458429903 | 1.691141456  |
| ENSRORG00000016483  | -               | -                                                                                                        | -2.032873629 | -0.627413836 | 3.047024618 | 1.642059796  |
| ENSRORG00000017156  | -               | -                                                                                                        | -8.86549994  | 5.813549937  | 15.8745469  | 1.156912643  |
| ENSRORG00000004679  | -               | -                                                                                                        | -1.706428613 | 1.682618316  | 3.838071959 | 0.448511676  |
| ENSRORG00000012642  | lsm1            | LSM1 homolog, mRNA degradation associated [Source:NCBI;gene:Acc:101156502]                               | -8.854368753 | 1.005387662  | 5.297553475 | -4.561717824 |

|                     |               |                                                                                                                                  |              |              |             |              |
|---------------------|---------------|----------------------------------------------------------------------------------------------------------------------------------|--------------|--------------|-------------|--------------|
| ENSRGLG0000009440   | pdrg1         | p53 and DNA-damage regulated 1<br>[Source:ZFIN;Acc:ZDB-GENE-050417-276]                                                          | -3.622963006 | 1.337712167  | 4.996581425 | 0.036391326  |
| ENSRGLG0000005610   | chst15        | carboxylate (N-acetyl)glucosamine 4-sulfate 6-O-sulfotransferase 15 [Source:ZFIN;Acc:ZDB-GENE-131127-327]                        | -0.256271973 | 2.755527025  | 4.618465489 | 1.607152571  |
| ENSRGLG0000006438   | lin37         | lin-37 DREAM-MuvB core complex component<br>[Source:ZFIN;Acc:ZDB-GENE-050417-446]                                                | -0.180759979 | 0.503123245  | 3.307445544 | 2.624047291  |
| ENSRGLG0000009577   | cenpn         | centromere protein N [Source:ZFIN;Acc:ZDB-GENE-030616-408]                                                                       | -3.135671935 | 0.728496861  | 3.765561316 | -0.098124321 |
| ENSRGLG0000007573   | zgc:112148    | Gold-1 apparatus membrane protein TP23 homolog B<br>[Source:NCBI gene:Acc:101169291]                                             | -1.702391652 | 1.003262687  | 4.557165174 | 1.851995578  |
| ENSRGLG0000005380   | zgc:165532    | zgc:165532 [Source:ZFIN;Acc:ZDB-GENE-050417-213]                                                                                 | -1.993978416 | 1.430391763  | 4.636660355 | 1.212720637  |
| ENSRGLG00000012834  | gmn           | geminin, DNA replication inhibitor<br>[Source:ZFIN;Acc:ZDB-GENE-030429-30]                                                       | -3.151862289 | 1.260544731  | 3.59310441  | -0.818817546 |
| ENSRGLG0000006192   | -             | glutathione S-transferase omega-1 [Source:NCBI gene:Acc:101171103]                                                               | -3.66158352  | 1.529315321  | 7.254204038 | 2.063790421  |
| ENSRGLG0000001118   | mctsl         | MCTSL re-initiation and release factor [Source:NCBI gene:Acc:101161648]                                                          | -6.218389631 | 2.238739898  | 7.687541888 | -0.769156762 |
| ENSRGLG0000001018   | -             | -                                                                                                                                | -0.309996621 | 2.0084688    | 6.74815899  | 1.314454217  |
| ENSRGLG0000005300   | -             | -                                                                                                                                | -5.25353499  | -2.209068204 | 3.215887159 | -0.300115382 |
| ENSRGLG0000009642   | -             | -                                                                                                                                | 1.18146338   | 2.579217222  | 4.131689854 | 2.734424049  |
| ENSRGLG0000003303   | sent9b        | sentin 9b [Source:ZFIN;Acc:ZDB-GENE-050327-17]                                                                                   | -0.412724985 | 0.264037018  | 3.147352613 | 2.471074519  |
| ENSRGLG0000002932   | saln3         | DLR anticodon binding domain containing 3<br>[Source:ZFIN;Acc:ZDB-GENE-061103-415]                                               | -2.57592458  | 1.006473252  | 3.997489042 | 0.415907892  |
| ENSRGLG00000021510  | Rf00322       | small nucleolar RNA SNORA31 [Source:NCBI gene:Acc:11547250]                                                                      | -3.405478756 | 2.60043889   | 7.314498641 | 1.309070345  |
| ENSRGLG00000015671  | -             | dyxactin subunit 3 [Source:NCBI gene:Acc:101164183]                                                                              | -0.868269045 | 0.97235344   | 3.200760756 | 1.36062308   |
| ENSRGLG00000013026  | slc25a17      | solute carrier family 25 (mitochondrial carrier; peroxisomal membrane protein), member 17<br>[Source:ZFIN;Acc:ZDB-GENE-070620-4] | -1.771554885 | 0.840085764  | 3.47301788  | 0.861862103  |
| ENSRGLG00000013278  | snrpd2        | small nuclear ribonucleoprotein D2 polypeptide<br>[Source:NCBI gene:Acc:101158296]                                               | -2.11870364  | 1.885802504  | 3.968432522 | -0.035588817 |
| ENSRGLG00000011936  | -             | -                                                                                                                                | 0.015797766  | 2.037550045  | 3.291544071 | 1.27027478   |
| ENSRGLG00000009782  | gdb8a         | glucose-induced degradation protein 8 homolog<br>[Source:NCBI gene:Acc:101165057]                                                | -3.35283375  | 0.399360818  | 4.816833099 | 1.065123771  |
| ENSRGLG00000007571  | -             | -                                                                                                                                | -4.460205864 | 0.474881878  | 5.446120612 | 0.511518142  |
| ENSRGLG00000006150  | thtpa         | thiamine triphosphatase [Source:ZFIN;Acc:ZDB-GENE-070502-2]                                                                      | -2.022865986 | 0.712552196  | 3.307056365 | 0.57210259   |
| ENSRGLG0000007565   | WASHC2C       | WASH complex subunit 2C [Source:HGNC Symbol;Acc:HGNC:23414]                                                                      | -1.366083162 | 0.085243667  | 3.125079868 | 1.674237788  |
| ENSRGLG0000003464   | fam206a       | family with sequence similarity 206 member A<br>[Source:NCBI gene:Acc:101170501]                                                 | -5.351184457 | 0.66830423   | 4.182041464 | -1.836988739 |
| ENSRGLG00000008096  | sam1          | sterile alpha and TIR motif containing 1<br>[Source:ZFIN;Acc:ZDB-GENE-040719-11]                                                 | -1.655598808 | -0.540119946 | 3.543257007 | 2.428265253  |
| ENSRGLG00000015806  | zgc:101564    | family with sequence similarity 72 member A<br>[Source:NCBI gene:Acc:10118016]                                                   | -0.450130265 | 0.658943631  | 3.547038891 | 2.438447832  |
| ENSRGLG00000008916  | capza1b       | F-actin-capping protein subunit alpha-1 [Source:NCBI gene:Acc:101159261]                                                         | -2.246926619 | 0.787331463  | 4.002955329 | 0.969182522  |
| ENSRGLG00000014759  | -             | -                                                                                                                                | -0.358114672 | 2.209158112  | 4.698437116 | 2.131851089  |
| ENSRGLG00000055229  | -             | -                                                                                                                                | -4.422765183 | 0.352656186  | 3.838023692 | -0.936912587 |
| ENSRGLG0000001070   | zgc:56596     | ubiquitin like 4A [Source:NCBI gene:Acc:101168961]                                                                               | -2.262844441 | 1.123070753  | 3.220115512 | -0.162754761 |
| ENSRGLG00000016534  | -             | -                                                                                                                                | 0.148252945  | 1.142527945  | 3.06641747  | -0.05931154  |
| ENSRGLG00000011318  | -             | -                                                                                                                                | -1.591036294 | 0.050058684  | 3.687425248 | 2.048814215  |
| ENSRGLG00000009914  | -             | -                                                                                                                                | -3.359277246 | 1.93699342   | 4.560005138 | -0.735776131 |
| ENSRGLG00000014702  | utp11         | UTP11, small subunit processome component<br>[Source:NCBI gene:Acc:101174775]                                                    | -6.293357296 | 2.245595038  | 6.296004755 | -2.242462707 |
| ENSRGLG00000021774  | ND4L          | NADH dehydrogenase subunit 4L [Source:NCBI gene:Acc:805424]                                                                      | -10.90893038 | 1.179089371  | 13.61277465 | 1.525245107  |
| ENSRGLG00000009887  | zgc:153240.1  | zgc:153240 [Source:ZFIN;Acc:ZDB-GENE-060825-218]                                                                                 | -2.047460065 | 0.126590689  | 3.027527572 | 0.853961968  |
| ENSRGLG0000002638   | dut           | deoxyuridine triphosphatase [Source:NCBI gene:Acc:101171897]                                                                     | -0.846442551 | 0.236113997  | 3.57029478  | 2.492957911  |
| ENSRGLG000000014735 | -             | -                                                                                                                                | -1.361292615 | 0.965766247  | 3.310032663 | 0.983458478  |
| ENSRGLG00000015214  | nemp1         | nuclear envelope integral membrane protein 1<br>[Source:ZFIN;Acc:ZDB-GENE-090313-182]                                            | -1.989534404 | 0.449657719  | 3.438717466 | 1.000010553  |
| ENSRGLG00000013756  | -             | -                                                                                                                                | -2.476864585 | 0.535688171  | 3.240320155 | 0.22825214   |
| ENSRGLG00000003947  | aaed1         | cell division control protein 42 homolog [Source:NCBI gene:Acc:101164400]                                                        | -0.821750391 | 2.057405816  | 3.425608434 | 0.546938085  |
| ENSRGLG00000003792  | -             | -                                                                                                                                | -0.854670843 | 1.42586282   | 3.99774311  | 1.617694598  |
| ENSRGLG00000005936  | kif18a        | vesicle transport protein G0T1B [Source:NCBI gene:Acc:101162835]                                                                 | -2.03962202  | -0.455924144 | 3.195291578 | 1.61201306   |
| ENSRGLG00000007765  | sat2b         | kinesin family member 18A [Source:ZFIN;Acc:ZDB-GENE-040426-892]                                                                  | -3.296000119 | -0.424552389 | 4.231018517 | 1.36005991   |
| ENSRGLG00000001167  | -             | -                                                                                                                                | -1.888908178 | 6.280508182  | 6.223398865 | -1.832299306 |
| ENSRGLG00000007273  | ankrd13a      | ankyrin repeat domain 13A [Source:ZFIN;Acc:ZDB-GENE-030131-1833]                                                                 | -0.947277471 | 0.080171249  | 3.37782482  | 2.350818726  |
| ENSRGLG00000002158  | map2k5        | nuclear envelope integral membrane protein 1<br>[Source:ZFIN;Acc:ZDB-GENE-090313-182]                                            | -3.671367975 | 0.816420603  | 5.373646548 | 0.88634155   |
| ENSRGLG00000011537  | -             | -                                                                                                                                | -2.296281225 | 0.920685643  | 4.384100244 | 1.167618044  |
| ENSRGLG00000003452  | ran           | mitogen-activated protein kinase kinase 5<br>[Source:ZFIN;Acc:ZDB-GENE-030131-1517]                                              | -2.488021555 | 0.666569106  | 4.62297799  | 1.468872102  |
| ENSRGLG00000011527  | zgc:162816    | zgc:162816 [Source:ZFIN;Acc:ZDB-GENE-070410-94]                                                                                  | -3.471214014 | -0.035576632 | 3.202079273 | -0.233074231 |
| ENSRGLG00000013087  | rs25          | ribosomal protein S25 [Source:ZFIN;Acc:ZDB-GENE-040426-1788]                                                                     | -1.361767151 | 1.632098909  | 4.491328768 | 1.497947666  |
| ENSRGLG00000014721  | -             | -                                                                                                                                | -5.031956492 | -0.549912421 | 4.035147449 | -0.446417271 |
| ENSRGLG00000013387  | -             | -                                                                                                                                | -3.31084584  | -0.841485954 | 4.419335579 | 1.750481063  |
| ENSRGLG00000002761  | chby          | chubby homolog 1 (Drosophila) [Source:ZFIN;Acc:ZDB-GENE-030131-5074]                                                             | -2.961352631 | 1.915610942  | 6.403837262 | 1.52735823   |
| ENSRGLG0000001619   | bbs4          | Bardet-Biedl syndrome 4 [Source:ZFIN;Acc:ZDB-GENE-060126-2]                                                                      | -1.786208301 | -0.447336346 | 3.616546801 | 2.278159746  |
| ENSRGLG00000001290  | -             | -                                                                                                                                | -0.804279223 | -0.183787611 | 3.001990934 | 2.381984115  |
| ENSRGLG00000004778  | POC1A         | POC1 centriolar protein A [Source:HGNC Symbol;Acc:HGNC:24488]                                                                    | -1.129317577 | 0.758411864  | 4.305426918 | 2.418182303  |
| ENSRGLG00000011006  | ltnm4         | RNA binding motif protein 48 [Source:NCBI gene:Acc:101175089]                                                                    | -4.062007955 | -0.243920876 | 4.904294817 | 1.086692565  |
| ENSRGLG00000010275  | snim4         | small integral membrane protein 4<br>[Source:ZFIN;Acc:ZDB-GENE-170130-11]                                                        | -1.937356602 | 1.32814974   | 3.778663209 | 0.513641639  |
| ENSRGLG00000011894  | -             | -                                                                                                                                | -1.71394152  | 0.46413046   | 3.76055314  | 1.84891153   |
| ENSRGLG00000009995  | -             | -                                                                                                                                | -3.332814442 | 2.73539545   | 6.971758446 | 1.329747294  |
| ENSRGLG00000007301  | pin4          | peptidylprolyl cis/trans isomerase, NIMA-interacting 4<br>[Source:NCBI gene:Acc:101160079]                                       | -2.277939809 | 0.435501284  | 4.691301165 | 1.978345122  |
| ENSRGLG00000011885  | hahd2         | haloblast dehalogenase like hydrolase domain containing 2 [Source:NCBI gene:Acc:101168225]                                       | -2.987644828 | -0.289948708 | 3.435849278 | 0.738638031  |
| ENSRGLG00000011898  | -             | -                                                                                                                                | -3.14782742  | 1.217332691  | 3.74341172  | -0.590334086 |
| ENSRGLG00000011113  | -             | -                                                                                                                                | 0.123068355  | 2.312193738  | 4.286246713 | 1.801381123  |
| ENSRGLG00000002592  | -             | -                                                                                                                                | -8.081337151 | 1.31166072   | 9.097291527 | -0.295221226 |
| ENSRGLG00000011389  | HENMT1        | HERN methyltransferase 1 [Source:NCBI gene:Acc:101168973]                                                                        | -2.101804469 | -0.297534688 | 3.150918209 | 1.347133669  |
| ENSRGLG00000004675  | -             | -                                                                                                                                | -6.309527862 | 1.371902308  | 7.322873781 | -0.358070895 |
| ENSRGLG00000002580  | si:ch211-5119 | chromosome 9 C2orf89 homolog [Source:NCBI gene:Acc:101172621]                                                                    | -4.057638405 | 1.690234143  | 4.91926164  | -0.8281265   |
| ENSRGLG00000005191  | TENT4A        | terminal nucleotidyltransferase 4A [Source:HGNC Symbol;Acc:HGNC:16705]                                                           | -2.868266254 | 0.552264674  | 3.807826377 | 0.3877801    |

|            |     |                    |                                                                                                                                   |              |              |              |              |
|------------|-----|--------------------|-----------------------------------------------------------------------------------------------------------------------------------|--------------|--------------|--------------|--------------|
|            |     | ENSRGLG00000006911 | iron-sulfur cluster assembly enzyme [Source:NCBI gene:Acc:101165644]                                                              | -4.29586826  | 1.791634288  | 5.749462301  | -0.33757987  |
|            |     | ENSRGLG00000007738 | mediator complex subunit 7 [Source:ZFIN:Acc:ZDB-GENE-030131-4823]                                                                 | -2.310335775 | 0.862391836  | 3.195055848  | 0.022813002  |
|            |     | ENSRGLG00000006196 | GABA(A) receptor-associated protein 4 [Source:ZFIN:Acc:ZDB-GENE-030131-5174]                                                      | -2.364164229 | 2.277057638  | 4.845451885  | 0.204804976  |
|            |     | ENSRGLG00000007400 | pleckstrin homology domain containing, family A (phosphoinositide binding specific) member 8 [Source:ZFIN:Acc:ZDB-GENE-041114-69] | -1.366054216 | 0.662827951  | 3.863004919  | 1.834607714  |
|            |     | ENSRGLG00000009118 | DNMT1 demethylase domain transferase 1 homolog [Source:NCBI gene:Acc:101156415]                                                   | -3.435980431 | 0.04470067   | 3.099351042  | -0.380845313 |
|            |     | ENSRGLG00000006393 | spermine synthase [Source:ZFIN:Acc:ZDB-GENE-040626-150]                                                                           | -1.782020485 | 0.587911657  | 3.370779092  | 1.001331723  |
|            |     | ENSRGLG00000008500 | CRMB1 [Source:ZFIN:Acc:ZDB-GENE-091204-31]                                                                                        | -0.021481172 | 2.32918583   | 3.042944027  | 0.692762891  |
|            |     | ENSRGLG00000015097 | ORMDL1 sphingolipid biosynthesis regulator 1 [Source:NCBI gene:Acc:101165518]                                                     | -3.169345342 | 2.672560223  | 6.772123603  | 0.930702138  |
|            |     | ENSRGLG00000006183 | RSH domain containing 4 [Source:ZFIN:Acc:ZDB-GENE-070112-1321]                                                                    | 0.431198199  | 0.645465084  | 3.048386357  | 2.834584336  |
|            |     | ENSRGLG00000009674 | glutathione S-transferase alpha 4 [Source:NCBI gene:Acc:101174370]                                                                | -1.729085155 | 0.190918682  | 3.264822831  | 1.345304079  |
|            |     | ENSRGLG00000016567 | uncharacterized LOC101171452 [Source:NCBI gene:Acc:101168963]                                                                     | -4.251554751 | 1.471468971  | 3.95017021   | -1.772369141 |
|            |     | ENSRGLG00000006863 | zwilch keratohelone protein [Source:ZFIN:Acc:ZDB-GENE-050420-101]                                                                 | -0.052517396 | 0.374715112  | 3.204762085  | 2.77801447   |
|            |     | ENSRGLG00000011756 | calcium and integrin binding 1 [Source:NCBI gene:Acc:101168963]                                                                   | -1.393423421 | 2.063433711  | 6.157268615  | 2.700896404  |
|            |     | ENSRGLG00000009140 | mitochondrial ribosome-associated GTPase 1 [Source:ZFIN:Acc:ZDB-GENE-031110-2]                                                    | -3.403467888 | 0.141661922  | 3.112714905  | -0.431930105 |
|            |     | ENSRGLG00000008200 | gqnr1 Gq90 SNAP receptor complex member 1 [Source:ZFIN:Acc:ZDB-GENE-050417-133]                                                   | -4.741927918 | -0.290168319 | 4.412188043  | -0.039086557 |
|            |     | ENSRGLG00000002070 | small nuclear ribonucleoprotein polypeptide E [Source:NCBI gene:Acc:101173384]                                                    | -4.475864599 | 0.289224494  | 5.993360621  | 1.228656617  |
|            |     | ENSRGLG00000012059 | snppe Sec61 translocon gamma subunit [Source:NCBI gene:Acc:11001315]                                                              | -2.594118475 | 1.480434251  | 4.669020982  | 0.594953091  |
|            |     | ENSRGLG00000007075 | sec61g Sec61 translocon gamma subunit [Source:NCBI gene:Acc:11001315]                                                             | -2.639569081 | 0.965365655  | 3.578980304  | -0.025469562 |
|            |     | ENSRGLG00000002013 | -                                                                                                                                 | -4.376841511 | -1.32178261  | 3.393184219  | 0.338610192  |
|            |     | ENSRGLG00000017324 | -                                                                                                                                 | -1.223116103 | -0.145824804 | 3.751187695  | 2.674380555  |
|            |     | ENSRGLG00000015237 | ctf8 CTF8 molecule [Source:NCBI gene:Acc:101174188]                                                                               | 1.366021258  | 2.01189758   | 3.38219289   | 2.691535654  |
|            |     | ENSRGLG00000005015 | centromere protein Q [Source:NCBI gene:Acc:101174332]                                                                             | -0.283691967 | 0.586103183  | 3.573332909  | 2.704022663  |
|            |     | ENSRGLG00000003667 | btgqm1 bisphosphoglycerate mutase [Source:NCBI gene:Acc:101174407]                                                                | -0.718692232 | 0.231484774  | 3.25319884   | 2.25627818   |
|            |     | ENSRGLG00000004376 | PPP4R3B protein phosphatase 4 regulatory subunit 3B [Source:HGNC Symbol:Acc:HGNC:29267]                                           | -1.714069121 | 0.935882642  | 3.296490009  | 0.64702312   |
|            |     | ENSRGLG00000010445 | -                                                                                                                                 | -2.352818927 | 0.080622143  | 4.39556566   | 1.962610196  |
|            |     | ENSRGLG00000008444 | ube2t ubiquitin conjugating enzyme E2 T [Source:NCBI gene:Acc:101156892]                                                          | -3.410367946 | 0.400503705  | 4.603495642  | 0.793108905  |
|            |     | ENSRGLG00000003381 | r9 R9, pre-mRNA splicing factor [Source:NCBI gene:Acc:10110108]                                                                   | -3.603981353 | 0.625957007  | 3.634253384  | -0.595200471 |
|            |     | ENSRGLG00000016473 | ACYP1 acylcholinesterase 1 [Source:HGNC]                                                                                          | -3.181462253 | 2.62546649   | 3.896957859  | -1.909480536 |
|            |     | ENSRGLG00000007802 | testis-expressed 261 [Source:NCBI gene:Acc:101155302]                                                                             | -2.536503824 | 1.078088337  | 3.195782877  | -0.419302495 |
|            |     | ENSRGLG00000011538 | HST17A3 histone H3 [Source:NCBI gene:Acc:101166978]                                                                               | -3.736744617 | -1.367839192 | 3.672843301  | 1.244860919  |
|            |     | ENSRGLG00000003334 | usp16 ubiquitin specific peptidase 16 [Source:ZFIN:Acc:ZDB-GENE-030131-4153]                                                      | -4.856042031 | 0.040521248  | 3.503443103  | -1.392634796 |
|            |     | ENSRGLG00000004697 | dum1d2b DUM1 domain containing 2, domain containing 2b [Source:ZFIN:Acc:ZDB-GENE-040625-]                                         | -2.10795586  | 0.847969884  | 5.042851231  | 2.087413022  |
|            |     | ENSRGLG00000007253 | COMM4 COMM domain containing 4 [Source:NCBI gene:Acc:101165952]                                                                   | -1.028781403 | 1.191203787  | 3.864535966  | 1.645035674  |
|            |     | ENSRGLG00000017636 | ef4eb eukaryotic translation initiation factor 4E [Source:NCBI gene:Acc:101166761]                                                | 0.253778853  | 0.573597283  | 3.07883827   | 2.759514748  |
|            |     | ENSRGLG00000017809 | trappc2 trafficking protein particle complex 2 [Source:NCBI gene:Acc:101168660]                                                   | -4.8593573   | 2.895503076  | 7.335405651  | -0.418968004 |
|            |     | ENSRGLG00000005543 | CDC37 cell division cycle 37 [Source:NCBI gene:Acc:101156088]                                                                     | -2.81307646  | 0.255805862  | 3.53612531   | 0.47111178   |
|            |     | ENSRGLG00000006644 | -                                                                                                                                 | -2.64954204  | -0.203902955 | 4.201508689  | 1.756420226  |
|            |     | ENSRGLG00000009196 | -                                                                                                                                 | -2.67026755  | 0.85264109   | 3.13359711   | -0.365220163 |
|            |     | ENSRGLG00000015785 | uncharacterized LOC101160866 [Source:NCBI gene:Acc:101160866]                                                                     | -2.089190299 | -0.550836899 | 3.312444945  | 1.774575891  |
|            |     | ENSRGLG00000007013 | pi9n chondroitin-6-sulfate glycan anchor biosynthesis, class N [Source:ZFIN:Acc:ZDB-GENE-080204-114]                              | -1.284404387 | 1.897254602  | 3.670788565  | 0.489614712  |
|            |     | ENSRGLG00000006462 | tmem258 transmembrane protein 258 [Source:NCBI gene:Acc:105354217]                                                                | -2.843091395 | 1.686917496  | 4.639756627  | 0.110232729  |
|            |     | ENSRGLG00000008134 | -                                                                                                                                 | -4.858950663 | -0.09602417  | 5.038082075  | 0.275641072  |
| Hmt VS HmC | 340 | ENSRGLG00000008986 | gpm GTP binding protein overexpressed in skeletal muscle [Source:ZFIN:Acc:ZDB-GENE-060825-251]                                    | 0.595751169  | -2.077513401 | 1.102965766  | 3.776715268  |
|            |     | ENSRGLG00000005116 | cdip1 cell death inducing p53 target 1 [Source:NCBI gene:Acc:101173632]                                                           | 1.672156145  | 0.198747775  | 1.710319609  | 3.184212899  |
|            |     | ENSRGLG00000001968 | COL8A1 collagen type VIII alpha 1 chain [Source:HGNC Symbol:Acc:HGNC:2215]                                                        | 3.554413116  | 0.856271178  | 1.406561666  | 4.105192815  |
|            |     | ENSRGLG00000017844 | chmp5a charged multivesicular body protein 5 [Source:NCBI gene:Acc:101164680]                                                     | 1.243887226  | -0.651105339 | 1.635162173  | 3.530639926  |
|            |     | ENSRGLG00000004422 | nek8 NIMA related kinase 8 [Source:NCBI gene:Acc:101161178]                                                                       | 1.245857411  | -0.32701954  | 2.913509985  | 4.486871861  |
|            |     | ENSRGLG00000005532 | wdr19 WD repeat domain 19 [Source:NCBI gene:Acc:101165282]                                                                        | 0.187280701  | -0.362123335 | 2.951012282  | 3.500901361  |
|            |     | ENSRGLG00000007236 | CDHR2 cadherin related family member 2 [Source:HGNC Symbol:Acc:HGNC:18231]                                                        | 2.625814794  | -0.773089598 | -0.387868381 | 3.011516952  |
|            |     | ENSRGLG00000016124 | snap25a synaptosome associated protein 25 [Source:NCBI gene:Acc:101165388]                                                        | 0.654148617  | -3.663988608 | 0.712559398  | 0.531178519  |
|            |     | ENSRGLG00000013554 | UBA3 (1 of multiple) ubiquitin like modifier activating enzyme 3 [Source:HGNC Symbol:Acc:HGNC:12470]                              | 0.792611299  | -0.162601088 | 2.899170991  | 3.854868353  |
|            |     | ENSRGLG00000001216 | -                                                                                                                                 | 2.784688481  | 1.009228267  | 2.692262933  | 4.46820847   |
|            |     | ENSRGLG00000003842 | cdkn2d cyclin dependent kinase inhibitor 2D [Source:NCBI gene:Acc:101155292]                                                      | 2.400958575  | 0.459634584  | 1.939393588  | 3.881202249  |
|            |     | ENSRGLG00000011838 | slc2a3b solute carrier family 2 (facilitated glucose transporter), member 3b [Source:ZFIN:Acc:ZDB-GENE-121031-5]                  | -2.541991047 | -5.25148045  | 1.944097701  | 4.654075948  |
|            |     | ENSRGLG00000012769 | SLC22A23 solute carrier family 22 member 23 [Source:NCBI gene:Acc:HGNC:2118]                                                      | 2.77603538   | 0.40139741   | 1.242076171  | 3.622144004  |
|            |     | ENSRGLG00000011855 | trtm13 tripartite motif containing 13 [Source:ZFIN:Acc:ZDB-GENE-050822-516]                                                       | 2.985251118  | 0.599122498  | 1.083325639  | 3.469939021  |
|            |     | ENSRGLG00000015047 | -                                                                                                                                 | 4.945549459  | 3.076626369  | 1.432089195  | 3.301511177  |
|            |     | ENSRGLG00000014336 | -                                                                                                                                 | 4.451004496  | 2.41297507   | 1.194348988  | 3.233443814  |
|            |     | ENSRGLG00000000717 | -                                                                                                                                 | 0.39044598   | -4.181440695 | -0.781012736 | 3.791360171  |
|            |     | ENSRGLG00000002025 | -                                                                                                                                 | -0.071470689 | -1.165301806 | 2.163515071  | 3.261830458  |
|            |     | ENSRGLG00000014579 | lrtn1 leucine rich repeat neuronal 1 [Source:ZFIN:Acc:ZDB-GENE-071126-1]                                                          | 5.831161831  | 2.496975988  | 1.018335462  | 4.353008406  |
|            |     | ENSRGLG00000008860 | slc5a8 solute carrier family 5 (sodium/motocarbonylate cotransporter), member 8 [Source:ZFIN:Acc:ZDB-GENE-141211-63]              | 14.44307628  | 11.24312042  | 2.514449521  | 5.714873158  |
|            |     | ENSRGLG00000014306 | -                                                                                                                                 | 2.969142878  | 0.498219313  | 1.584623732  | 4.056034618  |
|            |     | ENSRGLG00000001690 | gram32aa GRAM domain containing 2Aa [Source:ZFIN:Acc:ZDB-GENE-040724-9]                                                           | 2.943732439  | 0.94752462   | 1.178269536  | 3.174961773  |
|            |     | ENSRGLG00000015199 | -                                                                                                                                 | 2.837595746  | 0.592786435  | 1.884307716  | 4.124600623  |
|            |     | ENSRGLG00000016169 | zmat4a zinc finger, matrix-type 4a [Source:ZFIN:Acc:ZDB-GENE-081104-333]                                                          | 14.54541279  | 12.34376867  | 1.738547138  | 3.940600395  |
|            |     | ENSRGLG00000012993 | hpdh 4-hydroxyphenylpyruvate dioxygenase b [Source:ZFIN:Acc:ZDB-GENE-040808-62]                                                   | 2.638133904  | 0.875158132  | 1.604615663  | 3.368077299  |

|                     |                 |                                                                                                   |              |              |              |             |
|---------------------|-----------------|---------------------------------------------------------------------------------------------------|--------------|--------------|--------------|-------------|
| ENSORLG0000000795   | sec14i7         | SEC14-like lipid binding 7 [Source:ZFIN;Acc:ZDB-GENE-141216-145]                                  | 2.501821423  | -0.154391347 | 1.395413154  | 4.052111039 |
| ENSORLG00000005265  | -               | -                                                                                                 | 2.637697727  | -0.347616777 | 2.202388539  | 5.188189941 |
| ENSORLG00000004977  | -               | -                                                                                                 | 4.148880334  | 2.159601831  | 1.444631682  | 3.43432578  |
| ENSORLG00000003848  | -               | -                                                                                                 | 2.493664542  | 0.3514288    | 1.776072087  | 3.918792689 |
| ENSORLG000000013681 | pm20d1.2        | peptidase M20 domain containing 1, tandem duplicate 2 [Source:ZFIN;Acc:ZDB-GENE-061013-637]       | 0.815675198  | 0.692078175  | 2.960394281  | 3.084476187 |
| ENSORLG000000010725 | -               | -                                                                                                 | 3.333863353  | 1.495646614  | 2.353271814  | 4.191978906 |
| ENSORLG000000002292 | si:dkey-178e1   | si:dkey-178e171.1 [Source:ZFIN;Acc:ZDB-GENE-081104-411]                                           | 2.546418865  | 0.746230107  | 1.458151497  | 3.258825101 |
| ENSORLG000000011156 | -               | -                                                                                                 | 2.787058265  | 0.124495324  | 1.37898136   | 4.042029266 |
| ENSORLG000000007883 | -               | -                                                                                                 | 4.219956547  | 1.216782583  | 1.728816188  | 4.732369283 |
| ENSORLG000000003519 | zplane2         | ciliogenesis and planar polarity effector 2 [Source:ZFIN;Acc:ZDB-GENE-040912-80]                  | 1.310902635  | -0.424591049 | 2.361685932  | 4.097664651 |
| ENSORLG000000004941 | stag3           | stromal antigen 3 [Source:ZFIN;Acc:ZDB-GENE-140106-130]                                           | 2.794024147  | -0.129220196 | 0.883592718  | 3.807321877 |
| ENSORLG000000012941 | -               | -                                                                                                 | 3.2106411    | 0.273671735  | 2.586705776  | 5.52418003  |
| ENSORLG000000002630 | cell3a          | cugbp. Elav-like family member 3a [Source:ZFIN;Acc:ZDB-GENE-000501-2]                             | 2.292459658  | 0.026117345  | 1.397857736  | 3.664684568 |
| ENSORLG000000002015 | soca            | short coiled-coil protein a [Source:ZFIN;Acc:ZDB-GENE-061013-114]                                 | 2.341769617  | 0.222355419  | 0.925522677  | 3.045421954 |
| ENSORLG000000012887 | arpp19a         | CAMP-regulated phosphoprotein 19 [Source:NCBI gene;Acc:101168529]                                 | 0.485354658  | -0.294368085 | 2.318330592  | 3.0985383   |
| ENSORLG000000003581 | dnajp4          | DnaJ heat shock protein family (Hsp40) member B4 [Source:NCBI gene;Acc:101170125]                 | 5.952855913  | 3.447448033  | 0.798350339  | 3.304244335 |
| ENSORLG000000007139 | -               | -                                                                                                 | 5.10754622   | 4.721459207  | 2.714588322  | 3.101162708 |
| ENSORLG000000013970 | blmh            | bleomycin hydrolase [Source:ZFIN;Acc:ZDB-GENE-030131-8485]                                        | 1.448283458  | -0.679403096 | 0.910479424  | 3.03650843  |
| ENSORLG000000003382 | -               | -                                                                                                 | 0.968272433  | -0.339865953 | 2.099515781  | 3.408139058 |
| ENSORLG000000008300 | med1            | mediator complex subunit 1 [Source:ZFIN;Acc:ZDB-GENE-081104-257]                                  | 1.872034453  | 0.28695195   | 1.520533291  | 3.106067762 |
| ENSORLG000000004320 | synj1           | synaptotagmin 1 [Source:ZFIN;Acc:ZDB-GENE-030131-9180]                                            | 2.098896929  | -0.072739869 | 1.088946609  | 3.261068058 |
| ENSORLG000000003598 | -               | -                                                                                                 | 2.097925021  | 0.150824645  | 2.800403115  | 4.747988182 |
| ENSORLG000000006301 | samd13          | sterile alpha motif domain containing 13 [Source:ZFIN;Acc:ZDB-GENE-060929-676]                    | 1.634090341  | 0.764256579  | 2.759252177  | 3.629570748 |
| ENSORLG000000001281 | -               | -                                                                                                 | 1.870452271  | 0.101608352  | 2.156702039  | 3.926031027 |
| ENSORLG000000006930 | SCN8A           | sodium voltage-gated channel alpha subunit 8 [Source:HGNC Symbol;Acc:HGNC:10996]                  | 0.943045223  | 0.368059928  | 2.815556645  | 3.90991364  |
| ENSORLG000000009737 | hpk3b           | homeodomain interacting protein kinase 3b [Source:ZFIN;Acc:ZDB-GENE-030131-82]                    | 2.208336447  | -0.051507822 | 1.212744059  | 3.473074006 |
| ENSORLG000000011521 | -               | -                                                                                                 | 0.904684098  | -3.807140313 | 0.322340983  | 5.034650193 |
| ENSORLG000000016430 | ca5             | Letler congenital amaurosis 5 [Source:ZFIN;Acc:ZDB-GENE-090313-268]                               | 0.773669546  | 0.021127672  | 2.791956264  | 3.544983244 |
| ENSORLG000000001438 | -               | -                                                                                                 | 3.204513267  | 0.672923209  | 0.985273865  | 3.568934852 |
| ENSORLG000000002318 | -               | -                                                                                                 | 14.58792925  | 12.53258483  | 1.182757976  | 3.285694645 |
| ENSORLG000000010903 | -               | -                                                                                                 | 1.816432354  | 0.334166642  | 1.898827677  | 3.880977639 |
| ENSORLG000000015146 | -               | -                                                                                                 | 0.042656897  | -0.242368287 | 2.811642968  | 3.097153096 |
| ENSORLG000000007063 | l3gnt7          | UDP-GlcNAc:betaGal beta-1,3-N-acetylglucosaminyltransferase 7 [Source:ZFIN;Acc:ZDB-GENE-021210-4] | 15.34224451  | 13.55704242  | 1.617383603  | 3.403053262 |
| ENSORLG000000016408 | si:dkey-1112.3  | echinoderm microtubule associated protein like 5 [Source:HGNC Symbol;Acc:HGNC:18197]              | 1.69854908   | 0.239166313  | 1.720975596  | 3.180842328 |
| ENSORLG000000017123 | stum            | stum, mechanosensory transduction mediator homolog [Source:ZFIN;Acc:ZDB-GENE-041014-164]          | 1.905808995  | 0.072983231  | 1.267475802  | 3.100787442 |
| ENSORLG000000006454 | CYP4F2          | cytochrome P450 family 4 subfamily F member 2 [Source:HGNC Symbol;Acc:HGNC:2645]                  | 2.66319324   | -0.039212848 | 0.684077494  | 3.398698616 |
| ENSORLG000000011168 | MTCO18B         | mtocin XVIII [Source:HGNC Symbol;Acc:HGNC:18150]                                                  | 1.574216876  | 1.398498474  | 0.588090075  | 4.102284722 |
| ENSORLG000000006506 | -               | -                                                                                                 | 2.250430988  | 0.425485632  | 1.200698538  | 3.02613198  |
| ENSORLG000000008548 | slitrk4         | SLIT and NTRK-like family, member 4 [Source:ZFIN;Acc:ZDB-GENE-140303-1]                           | 13.71449775  | 11.72795023  | 2.583734359  | 4.570747894 |
| ENSORLG000000016151 | slf2d2a         | vesicle transport protein Slf2b-like [Source:NCBI gene;Acc:101171820]                             | 0.568687419  | -0.289705377 | 2.382107133  | 3.249864259 |
| ENSORLG000000006925 | rgra            | retinal G protein coupled receptor a [Source:ZFIN;Acc:ZDB-GENE-040924-6]                          | 2.893860865  | 0.326483796  | 2.404645813  | 4.972502663 |
| ENSORLG000000012832 | -               | -                                                                                                 | 2.160740659  | 0.402898633  | 1.66665706   | 3.4248931   |
| ENSORLG000000016707 | -               | -                                                                                                 | 2.709896117  | -0.319912999 | 2.119010717  | 5.149308803 |
| ENSORLG000000002984 | sl              | slizzed [Source:ZFIN;Acc:ZDB-GENE-080530-1]                                                       | 14.30194242  | 12.471404276 | 1.603499763  | 3.43600793  |
| ENSORLG000000010185 | si:dkey-222n6   | keratin 73 [Source:HGNC Symbol;Acc:HGNC:28928]                                                    | 2.823324877  | -0.724403258 | 0.258580889  | 3.806795833 |
| ENSORLG000000007401 | stox1           | storkhead box 1 [Source:ZFIN;Acc:ZDB-GENE-030225-2]                                               | 3.79397496   | 1.206270954  | 0.677451938  | 3.265643366 |
| ENSORLG000000005785 | si:dkey-290l1   | si:dkey-290l1.3 [Source:ZFIN;Acc:ZDB-GENE-100922-178]                                             | 2.291736575  | 0.45764284   | 2.14340464   | 3.977982091 |
| ENSORLG000000003120 | meiob           | meiosis specific with OB domains [Source:ZFIN;Acc:ZDB-GENE-120104-8]                              | 1.913936883  | 0.777958778  | 2.730890135  | 3.867353198 |
| ENSORLG000000008990 | -               | -                                                                                                 | 15.18648261  | 11.15022963  | 2.056752296  | 6.093471715 |
| ENSORLG000000006275 | -               | -                                                                                                 | 2.194103113  | -0.519243428 | 0.908334592  | 3.622166119 |
| ENSORLG000000015461 | mod1            | MAX dimerization protein 1 [Source:ZFIN;Acc:ZDB-GENE-080536-246]                                  | 2.121776981  | 0.079297579  | 1.388295275  | 3.431259831 |
| ENSORLG000000004615 | ago2            | argonate RISC catalytic component 2 [Source:ZFIN;Acc:ZDB-GENE-110606-6]                           | 1.944821069  | 0.859891609  | 2.701778829  | 3.787192435 |
| ENSORLG000000002474 | HOMER1          | homer scaffold protein 1 [Source:HGNC Symbol;Acc:HGNC:17512]                                      | 1.897199174  | -0.04347905  | 1.15305311   | 3.094216375 |
| ENSORLG00000001868  | -               | -                                                                                                 | 1.878424845  | -0.40244726  | 2.013234761  | 4.294592106 |
| ENSORLG000000006223 | -               | -                                                                                                 | 1.869413588  | 0.11342759   | 2.218687926  | 3.833024028 |
| ENSORLG000000006691 | mak             | male germ cell-associated kinase [Source:ZFIN;Acc:ZDB-GENE-030131-7279]                           | 3.040797419  | 0.873751813  | 2.581412089  | 4.748942467 |
| ENSORLG000000007894 | pal3st1a        | galactose-3-O-sulfotransferase 1 [Source:NCBI gene;Acc:101172098]                                 | 2.78974256   | -0.314318458 | 1.481871348  | 4.586325461 |
| ENSORLG000000008907 | -               | -                                                                                                 | 3.238723144  | -0.123102033 | 0.650589229  | 4.017647207 |
| ENSORLG000000011357 | palnt17         | polypeptide N-acetylglucosaminyltransferase 17 [Source:ZFIN;Acc:ZDB-GENE-110418-3]                | 4.26423963   | 1.31870004   | 0.795626159  | 3.741651405 |
| ENSORLG000000016639 | angel1          | angel homolog 1 (Drosophila) [Source:ZFIN;Acc:ZDB-GENE-111020-12]                                 | 1.944792327  | 0.367452655  | 1.749692158  | 3.327516779 |
| ENSORLG000000009374 | DISL2           | DIS3 like 3-5 nucleonuclease 2 [Source:HGNC Symbol;Acc:HGNC:28648]                                | 0.959425389  | 0.042318415  | 2.530237844  | 3.447829858 |
| ENSORLG000000012512 | tiparp          | TCDD-inducible poly(ADP-ribose) polymerase [Source:ZFIN;Acc:ZDB-GENE-031002-47]                   | 1.947958344  | -0.730611878 | 0.3612979    | 3.040353146 |
| ENSORLG000000003008 | -               | -                                                                                                 | -0.010512066 | -0.712048849 | 2.80026765   | 3.502248367 |
| ENSORLG000000001687 | psat1           | phosphoserine aminotransferase 1 [Source:ZFIN;Acc:ZDB-GENE-030131-5723]                           | -0.42183032  | -4.773948986 | -1.297272038 | 3.055331418 |
| ENSORLG000000017484 | -               | -                                                                                                 | 2.186769203  | -0.288488633 | 1.26900432   | 3.745347245 |
| ENSORLG000000005304 | adam10b         | ADAM metalloproteinase domain 10b [Source:ZFIN;Acc:ZDB-GENE-071115-1]                             | 1.770490564  | 0.368992841  | 1.616558648  | 3.018541294 |
| ENSORLG000000006135 | rip2            | Rib interacting lysosomal protein like 2 [Source:NCBI gene;Acc:101159444]                         | 2.308267879  | 0.676966029  | 2.08012053   | 3.71189784  |
| ENSORLG000000005115 | tmprss5         | transmembrane serine protease 5 [Source:ZFIN;Acc:ZDB-GENE-131121-184]                             | 4.012419025  | -0.327570615 | 2.042841386  | 6.383318937 |
| ENSORLG000000013999 | apoa2           | uncharacterized LOC101163028 [Source:NCBI gene;Acc:101163028]                                     | 1.193878907  | -3.130936736 | 0.326748196  | 4.652048095 |
| ENSORLG000000010484 | lvsn2           | forkhead box P2 [Source:ZFIN;Acc:ZDB-GENE-041203-3]                                               | 1.59272690   | -1.012941832 | 0.946240554  | 3.552397407 |
| ENSORLG000000007704 | ubash3b         | ubiquitin associated and SH3 domain containing Ba [Source:ZFIN;Acc:ZDB-GENE-060526-172]           | 1.856019575  | -0.270331715 | 1.275298616  | 3.402134887 |
| ENSORLG000000009621 | znc161989       | znc161989 [Source:ZFIN;Acc:ZDB-GENE-030131-2997]                                                  | 2.038368899  | -0.67498823  | 0.582702486  | 3.2965551   |
| ENSORLG000000003851 | si:dkey-323d3c3 | si:dkey-323d3c3 [Source:ZFIN;Acc:ZDB-GENE-030131-2997]                                            | 4.231314828  | 1.780114828  | 1.51172964   | 3.975511678 |
| ENSORLG000000003270 | SEMA3B          | semaphorin 3B [Source:HGNC Symbol;Acc:HGNC:10724]                                                 | 2.11264755   | -0.385873576 | 1.102752352  | 3.602375555 |
| ENSORLG000000005523 | si:dkey-23h12   | glycoprotein hormone beta-5-like [Source:NCBI gene;Acc:101171780]                                 | 13.23120618  | 0            | 2.718894648  | 15.95059303 |

|  |                      |             |                                                                                                     |              |              |              |             |
|--|----------------------|-------------|-----------------------------------------------------------------------------------------------------|--------------|--------------|--------------|-------------|
|  | ENSORLG00000010545   | msantd4     | Myb/SANT-like DNA-binding domain containing 4 with coiled-coils [Source:ZFIN;Acc:ZDB-GENE-121023-2] | 3.012733406  | 0.910678894  | 0.959241141  | 3.0617805   |
|  | ENSORLG00000011565   | -           | -                                                                                                   | 3.572279511  | 0.345427188  | 2.937513084  | 6.1648528   |
|  | ENSORLG00000002107   | -           | -                                                                                                   | 15.46273231  | 13.75475391  | 1.472700091  | 3.181146087 |
|  | ENSORLG000000010615  | -           | -                                                                                                   | 14.27924928  | 11.2567807   | 1.409513966  | 4.432450646 |
|  | ENSORLG000000011928  | tmem151ba   | transmembrane protein 151Ba [Source:ZFIN;Acc:ZDB-GENE-070820-12]                                    | 13.58289701  | 8.530835473  | 2.230109891  | 7.282623406 |
|  | ENSORLG000000000863  | DDX5        | DEAD-box helicase 5 [Source:HGNC Symbol;Acc:HGNC:2746]                                              | 2.618430232  | -0.137348152 | 0.301384284  | 3.05644756  |
|  | ENSORLG000000012509  | -           | -                                                                                                   | 2.118487894  | 0.066290829  | 1.527677738  | 3.580309953 |
|  | ENSORLG000000014192  | gpm1a       | glutamate metabotropic receptor 1 [Source:NCBI gene;Acc:101165118]                                  | 3.422289171  | -1.53645572  | 2.048055971  | 7.007283784 |
|  | ENSORLG000000011640  | -           | -                                                                                                   | 2.018476154  | -1.046119879 | 2.104006572  | 5.167091788 |
|  | ENSORLG000000000605  | -           | -                                                                                                   | 3.760836977  | 2.061318305  | 2.311947396  | 4.011948665 |
|  | ENSORLG000000001588  | GRXCR2      | glutaredoxin and cysteine rich domain containing 2 [Source:HGNC Symbol;Acc:HGNC:33862]              | 2.064331086  | 0.484886976  | 2.101223065  | 3.681151828 |
|  | ENSORLG000000006070  | -           | -                                                                                                   | 2.613267491  | 0.013268822  | 2.15015609   | 4.750641838 |
|  | ENSORLG000000016305  | -           | -                                                                                                   | 2.00877946   | -0.250996847 | 1.333849693  | 3.594061158 |
|  | ENSORLG000000016692  | -           | -                                                                                                   | 13.45527941  | 0            | 2.114439394  | 15.87222949 |
|  | ENSORLG000000012938  | kcrik10b    | potassium channel, subfamily K, member 10b [Source:ZFIN;Acc:ZDB-GENE-050420-31]                     | 15.18925395  | 9.560714954  | 1.260694119  | 6.889705908 |
|  | ENSORLG000000007323  | tchp        | trichoplein, keratin filament binding [Source:ZFIN;Acc:ZDB-GENE-060421-3368]                        | 0.12007356   | -0.636282921 | 2.394883618  | 3.151724829 |
|  | ENSORLG000000005999  | -           | -                                                                                                   | 0.566478259  | -2.043493682 | 1.067568506  | 3.677024171 |
|  | ENSORLG000000002636  | csdc2a      | cold shock domain containing C2, RNA binding a [Source:ZFIN;Acc:ZDB-GENE-040719-442]                | 15.38636673  | 0            | 0.818320454  | 16.20517889 |
|  | ENSORLG000000005690  | edrf1       | erythroid differentiation regulatory factor 1 [Source:ZFIN;Acc:ZDB-GENE-131121-620]                 | 2.996770211  | 0.422514065  | 0.65863365   | 3.233374267 |
|  | ENSORLG000000006451  | -           | -                                                                                                   | 15.38312213  | 12.72864757  | 0.898977963  | 3.533820343 |
|  | ENSORLG0000000014293 | kcni11      | ATP-sensitive inward rectifier potassium channel 11 [Source:NCBI gene;Acc:101160728]                | 3.695657261  | 0.341947421  | 0.135279602  | 3.489473941 |
|  | ENSORLG000000004150  | -           | -                                                                                                   | 1.228487201  | -0.304604526 | 2.287040559  | 3.800617012 |
|  | ENSORLG000000004863  | -           | -                                                                                                   | 1.924743889  | 0.941038372  | 2.338459676  | 3.320380552 |
|  | ENSORLG000000011797  | fbx2        | F-box and leucine-rich repeat protein 2 [Source:ZFIN;Acc:ZDB-GENE-030925-12]                        | 2.234393702  | 0.16514408   | 1.684570128  | 3.754304386 |
|  | ENSORLG000000001366  | hpk         | endoplasmic reticulum junction formation protein lunapark-B [Source:NCBI gene;Acc:101167978]        | -0.233043704 | -0.594629313 | 2.64211218   | 3.00418269  |
|  | ENSORLG000000006082  | -           | -                                                                                                   | 14.57665086  | 0            | 2.174822415  | 16.75196477 |
|  | ENSORLG000000013631  | C7orf43     | chromosome 7 open reading frame 43 [Source:HGNC Symbol;Acc:HGNC:25604]                              | 1.605994731  | 0.141891163  | 2.335383188  | 3.797517106 |
|  | ENSORLG000000011739  | zgc:153343  | GDP-D-glucose phosphorylase 1 [Source:HGNC Symbol;Acc:HGNC:24360]                                   | 1.97431704   | 1.10855925   | 2.857081849  | 3.723028736 |
|  | ENSORLG000000006074  | ift80       | intraflagellar transport 80 homolog (Chlamydomonas) [Source:ZFIN;Acc:ZDB-GENE-041212-50]            | 0.988372843  | -0.042122311 | 2.17644972   | 3.207429636 |
|  | ENSORLG000000005393  | eorneb      | oomes/berrin homolog b [Source:ZFIN;Acc:ZDB-GENE-070318-1]                                          | 0.715330152  | -0.847103387 | 1.518943357  | 3.081861986 |
|  | ENSORLG000000017953  | nrlj2       | nuclear receptor subfamily 1, group 1, member 2 [Source:ZFIN;Acc:ZDB-GENE-030903-3]                 | -0.677931313 | -2.450476676 | 1.236163849  | 3.009194395 |
|  | ENSORLG000000018104  | traf3ip1    | TNF receptor-associated factor 3 interacting protein 1 [Source:ZFIN;Acc:ZDB-GENE-040426-1146]       | -0.215714219 | -1.341895374 | 2.610750231  | 3.737416458 |
|  | ENSORLG000000012973  | -           | -                                                                                                   | 4.753959024  | 2.516794316  | 2.308101166  | 4.545756263 |
|  | ENSORLG000000002121  | me1         | malic enzyme 1, NAD(P)+-dependent, cytosolic [Source:ZFIN;Acc:ZDB-GENE-061013-438]                  | 1.174970806  | -0.816337214 | 2.403369421  | 4.395162499 |
|  | ENSORLG000000013928  | ush1gb      | Usher syndrome type-1G protein homolog [Source:NCBI gene;Acc:101174708]                             | 13.81991162  | 9.009464749  | 1.989909213  | 6.800819811 |
|  | ENSORLG000000000371  | -           | -                                                                                                   | 5.694318137  | -9.45489558  | 1.381428838  | 16.5311545  |
|  | ENSORLG000000000334  | tppp3       | tubulin polymerization-promoting protein family member 3 [Source:NCBI gene;Acc:101170163]           | 2.589473833  | 0.012074294  | 2.224364466  | 4.802249102 |
|  | ENSORLG000000000721  | -           | -                                                                                                   | 3.493493364  | 0.892212544  | 2.133315347  | 4.735090715 |
|  | ENSORLG000000007903  | -           | -                                                                                                   | 1.923531849  | 0.110561819  | 2.223243196  | 4.036688289 |
|  | ENSORLG000000002477  | pell1b      | E3 ubiquitin-protein ligase pellino homolog 1 [Source:NCBI gene;Acc:101167979]                      | 1.059740665  | -0.459709837 | 1.997453337  | 3.511788776 |
|  | ENSORLG000000001066  | -           | -                                                                                                   | 2.406332892  | -1.711674725 | -0.820298037 | 3.29728331  |
|  | ENSORLG000000006350  | arl3b       | ADP-ribosylation factor-like 13b [Source:ZFIN;Acc:ZDB-GENE-021217-3]                                | 1.822607649  | -0.10441531  | 1.622236815  | 3.549744548 |
|  | ENSORLG000000013109  | rhp1        | rhophilin, Rho GTPase binding protein 1 [Source:ZFIN;Acc:ZDB-GENE-081031-79]                        | 2.217009939  | 0.370445395  | 2.036129663  | 3.883180298 |
|  | ENSORLG000000010499  | hnhmp3      | heterogeneous nuclear ribonucleoprotein H3 (ZH9) [Source:ZFIN;Acc:ZDB-GENE-060421-3878]             | 1.670921725  | -0.331170778 | 2.000434283  | 4.003011567 |
|  | ENSORLG000000010631  | -           | -                                                                                                   | 1.972224532  | -0.342339798 | 2.926756668  | 5.241805878 |
|  | ENSORLG000000000846  | hapin4      | hyaluronan and proteoglycan link protein 4 [Source:ZFIN;Acc:ZDB-GENE-060503-243]                    | 2.393144708  | -0.185913095 | 1.289934297  | 3.869477857 |
|  | ENSORLG000000012657  | d3n3        | catyntenin 3 [Source:ZFIN;Acc:ZDB-GENE-100921-73]                                                   | 4.525304294  | 0.361623697  | 0.824081142  | 4.988252452 |
|  | ENSORLG000000002849  | dnc1        | DNA meiotic recombinase 1 [Source:ZFIN;Acc:ZDB-GENE-060331-39]                                      | 1.05144237   | -0.334607797 | 1.827705317  | 3.21424041  |
|  | ENSORLG000000017638  | -           | -                                                                                                   | 3.717975325  | -1.174651683 | 0.702453664  | 5.595563536 |
|  | ENSORLG000000014776  | -           | -                                                                                                   | 0.84509086   | -1.20783742  | 1.335833551  | 3.38924653  |
|  | ENSORLG000000016444  | zgc:77486   | ANI-type zinc finger protein 5 [Source:NCBI gene;Acc:101174824]                                     | 1.300422541  | 0.107845339  | 2.947484727  | 4.140546906 |
|  | ENSORLG000000016789  | -           | -                                                                                                   | 1.318290986  | -0.590227896 | 2.100176302  | 4.009179942 |
|  | ENSORLG000000016886  | dgkb        | diacylglycerol kinase, beta [Source:ZFIN;Acc:ZDB-GENE-070126-1]                                     | 2.453820928  | -0.817058029 | 0.803547383  | 4.074911702 |
|  | ENSORLG000000015241  | ATF5        | activating transcription factor 5 [Source:HGNC Symbol;Acc:HGNC:790]                                 | 2.771830834  | -0.739997955 | -0.158427423 | 3.353886237 |
|  | ENSORLG000000014485  | -           | -                                                                                                   | 15.30449072  | 10.29923092  | 2.28524432   | 7.270972502 |
|  | ENSORLG000000016383  | itm2        | fat storage-inducing transmembrane protein 2 [Source:ZFIN;Acc:ZDB-GENE-050508-6]                    | 1.394050377  | -1.159942902 | 0.73504218   | 3.30753252  |
|  | ENSORLG000000001279  | -           | -                                                                                                   | 2.540373115  | 0.235110459  | 1.540113409  | 3.848868029 |
|  | ENSORLG000000007192  | sgsm1a      | small G protein signaling modulator 1a [Source:ZFIN;Acc:ZDB-GENE-060526-379]                        | 3.41405037   | 2.491487719  | 2.358011866  | 3.281059894 |
|  | ENSORLG000000010273  | rx1a        | regulatory factor X 1a (influences HLA class II expression) [Source:ZFIN;Acc:ZDB-GENE-070424-94]    | 2.216909834  | 0.338455886  | 1.826832529  | 3.705771027 |
|  | ENSORLG000000011139  | -           | -                                                                                                   | 14.30823663  | -            | 2.230134638  | 3.000140621 |
|  | ENSORLG000000005070  | unkl        | unknown family zinc finger-like [Source:ZFIN;Acc:ZDB-GENE-131120-196]                               | 1.961043023  | 0.739284137  | 2.259147513  | 3.481391071 |
|  | ENSORLG000000009630  | sdkey-256k1 | zinc finger protein 512B [Source:HGNC Symbol;Acc:HGNC:29212]                                        | 2.784447384  | 1.524412893  | 2.068521366  | 3.329040581 |
|  | ENSORLG000000011566  | -           | -                                                                                                   | 6.571854188  | 4.146727284  | 0.627099929  | 3.052695046 |
|  | ENSORLG000000005350  | FAM53C      | family with sequence similarity 53 member C [Source:HGNC Symbol;Acc:HGNC:1336]                      | 1.08115078   | -0.259061017 | 2.696296181  | 4.036993033 |
|  | ENSORLG000000021159  | RF00001     | -                                                                                                   | 0.870673301  | -1.822695342 | 0.95454693   | 3.648400432 |
|  | ENSORLG000000013431  | FAM135B     | family with sequence similarity 135 member B [Source:HGNC Symbol;Acc:HGNC:28029]                    | 3.548735392  | 0.342623808  | 2.326545094  | 5.533144424 |
|  | ENSORLG000000005990  | -           | -                                                                                                   | 14.11836886  | 11.50722478  | 2.095753182  | 4.707361551 |
|  | ENSORLG000000016194  | cc232a      | coiled-coil and C2 domain containing 2A [Source:ZFIN;Acc:ZDB-GENE-030131-2291]                      | 0.315607712  | -0.703194912 | 2.264470541  | 3.283757933 |
|  | ENSORLG000000016150  | -           | -                                                                                                   | 1.045560145  | -0.674102518 | 2.864411204  | 4.58455885  |
|  | ENSORLG000000016377  | tmem169b    | transmembrane protein 169b [Source:ZFIN;Acc:ZDB-GENE-141211-51]                                     | 3.754790835  | 2.427953721  | 2.009653654  | 3.33697678  |
|  | ENSORLG000000010528  | hank4       | KN motif and ankyrin repeat domains 4 [Source:ZFIN;Acc:ZDB-GENE-120423-1]                           | 1.747831231  | -0.155059024 | 1.803734629  | 3.707109666 |
|  | ENSORLG000000007770  | neto1       | neuroligin (NRP) and tollid (TL)-like 1, like [Source:ZFIN;Acc:ZDB-GENE-091207-1]                   | 13.81559944  | 11.82655246  | 2.462502868  | 4.452017813 |
|  | ENSORLG000000012349  | caorb3a     | calcium channel, voltage-dependent, beta 3a [Source:ZFIN;Acc:ZDB-GENE-060221-2]                     | 2.518117567  | 1.121559179  | 2.384594506  | 3.78163841  |
|  | ENSORLG000000013931  | -           | -                                                                                                   | 2.72863095   | -1.00485039  | 2.688802143  | 6.432775738 |

|                     |                       |                                                                                                            |              |              |              |             |
|---------------------|-----------------------|------------------------------------------------------------------------------------------------------------|--------------|--------------|--------------|-------------|
| ENSORLG0000003586   | dzfp1                 | DAZ interacting zinc finger protein 1 [Source:ZFIN,Acc:ZDB-GENE-040526-11]                                 | 0.899670812  | -0.812964966 | 1.77434922   | 3.487465363 |
| ENSORLG0000000329   | zdhhc1                | zinc finger, DHHC-type containing 1 [Source:ZFIN,Acc:ZDB-GENE-130925-1]                                    | 1.90146047   | 0.768821792  | 2.609640543  | 3.742764138 |
| ENSORLG0000001516   | dd2a                  | discoidin domain receptor tyrosine kinase 2a [Source:ZFIN,Acc:ZDB-GENE-090316-2]                           | 3.141573301  | 0.83337165   | 1.794601087  | 4.103291162 |
| ENSORLG00000005132  | zdhhc21               | zinc finger, DHHC-type containing 21 [Source:ZFIN,Acc:ZDB-GENE-080401-2]                                   | 2.717981159  | 0.843656779  | 1.539548161  | 3.414327274 |
| ENSORLG00000001367  | -                     | -                                                                                                          | 2.934018061  | 0.728033483  | 1.458813739  | 3.66528367  |
| ENSORLG00000015540  | racgap1               | Rac GTPase activating protein 1 [Source:ZFIN,Acc:ZDB-GENE-030131-1917]                                     | 1.390786686  | 0.551389214  | 2.465116127  | 3.304989352 |
| ENSORLG00000010509  | dna14b                | dymrin, axonemal, light chain 4b [Source:ZFIN,Acc:ZDB-GENE-050208-510]                                     | 0.210342037  | -0.528629099 | 2.483094316  | 3.222549892 |
| ENSORLG00000013343  | lyne5                 | lyncee like 5 [Source:NCBI gene:Acc-100524201]                                                             | 2.031403925  | 1.400302402  | 2.67279669   | 3.304316002 |
| ENSORLG00000010885  | fam219ab              | frotin FAM219A [Source:NCBI gene:Acc-101166139]                                                            | 4.020381883  | 1.230917461  | 2.512297438  | 5.30224568  |
| ENSORLG00000013865  | sphx4                 | sphingosine hydrolase 4 [Source:ZFIN,Acc:ZDB-GENE-080227-1]                                                | 1.72959053   | -0.256661917 | 2.125962863  | 4.112699606 |
| ENSORLG00000007535  | nrnga                 | neurogranin (protein kinase C substrate, RC3) a [Source:ZFIN,Acc:ZDB-GENE-090710-4]                        | 1.895871889  | 0.42320392   | 1.824987428  | 3.298139555 |
| ENSORLG00000006801  | casp3                 | Cy288 latipes caspase 3 (casp3), mRNA [Source:RefSeq mRNA,Acc:NM_001104670]                                | 1.210481203  | -2.028830763 | 0.508469279  | 3.748266599 |
| ENSORLG00000006312  | slc25a22a             | solute carrier family 25 member 22a [Source:ZFIN,Acc:ZDB-GENE-110408-61]                                   | 1.998511952  | 0.379405843  | 1.62813939   | 3.247730463 |
| ENSORLG00000016333  | rapunzel4 (1 of many) | rapunzel4 4 [Source:ZFIN,Acc:ZDB-GENE-060417-472]                                                          | 1.893882362  | 0.608858175  | 1.80157907   | 3.086088317 |
| ENSORLG0000003068   | ttk1a                 | tau tubulin kinase 1a [Source:ZFIN,Acc:ZDB-GENE-100609-4]                                                  | 2.48697696   | -0.081630315 | 0.784932272  | 3.354026371 |
| ENSORLG00000003904  | -                     | -                                                                                                          | 1.869071233  | -0.854393631 | 1.184190792  | 3.90814045  |
| ENSORLG0000004927   | -                     | -                                                                                                          | 15.46140367  | 13.65424666  | 2.230931211  | 4.038556035 |
| ENSORLG00000006876  | chst3a                | carbohydrate (chondroitin 6) sulfotransferase 3a [Source:ZFIN,Acc:ZDB-GENE-090312-180]                     | 3.110631642  | 0.851400117  | 2.02609674   | 4.285724277 |
| ENSORLG00000002238  | il2bb                 | interleukin-12 subunit beta [Source:NCBI gene:Acc-10115453]                                                | 3.39547264   | 0.688039441  | 0.882646763  | 3.590569603 |
| ENSORLG0000001084   | wab2                  | WD repeat and SCAN3 box containing 2 [Source:ZFIN,Acc:ZDB-GENE-081104-26]                                  | 2.971208894  | -0.00156603  | 0.443998496  | 3.417258503 |
| ENSORLG00000041386  | tomn34                | translocase of outer mitochondrial membrane 34 [Source:ZFIN,Acc:ZDB-GENE-030131-2081]                      | 2.419256612  | 0.866246505  | 2.094726186  | 3.648221316 |
| ENSORLG00000016528  | PTGR1                 | prostaglandin reductase 1 [Source:NCBI gene:Acc-101158478]                                                 | 2.551297694  | -0.235719944 | 0.291867404  | 3.07937093  |
| ENSORLG00000013994  | waf1                  | WAF5 protein family member 1 [Source:NCBI gene:Acc-101159716]                                              | 2.203033815  | -0.23955544  | 0.765446932  | 3.208521106 |
| ENSORLG00000009849  | odf3b                 | outer dense fiber protein 3-B [Source:NCBI gene:Acc-101159189]                                             | 15.56411584  | 0            | 1.628877495  | 17.19348493 |
| ENSORLG00000007787  | vax2                  | ventral anterior homeobox 2 [Source:ZFIN,Acc:ZDB-GENE-030904-8]                                            | 13.51246271  | 11.81239393  | 2.402850941  | 4.103387401 |
| ENSORLG00000009929  | nuf2                  | NUF2, NDC80 kinetochore complex component, homolog [Source:ZFIN,Acc:ZDB-GENE-040426-1121]                  | 0.109294608  | -1.404874228 | 2.053462699  | 3.568116386 |
| ENSORLG00000011823  | -                     | -                                                                                                          | 0.122285653  | -1.352306309 | 2.98449013   | 4.45967012  |
| ENSORLG00000007179  | tm4d5                 | transmembrane 4 L six family member 5 [Source:NCBI gene:Acc-101168575]                                     | 3.4804034    | 1.102061806  | 0.655610061  | 3.034433218 |
| ENSORLG00000000094  | atcc10                | ATP-binding cassette, sub-family C (CFTR/MRP), member 10 [Source:ZFIN,Acc:ZDB-GENE-060817-24]              | -0.620686489 | -2.85943312  | 0.79939906   | 3.038571567 |
| ENSORLG00000015623  | ttr1                  | tubulin tyrosine ligase-like family, member 1 [Source:ZFIN,Acc:ZDB-GENE-040426-1326]                       | 0.738524842  | 0.156239873  | 2.876536615  | 3.459306446 |
| ENSORLG00000015190  | -                     | -                                                                                                          | 4.338980691  | 3.140730151  | 2.452715784  | 3.651451318 |
| ENSORLG00000000597  | -                     | uncharacterized LOC101174083 [Source:NCBI gene:Acc-101174083]                                              | 14.34812506  | 13.05090777  | 2.516518027  | 3.814150479 |
| ENSORLG00000015417  | dhdh1b                | DHDH domain containing 1b [Source:ZFIN,Acc:ZDB-GENE-040724-18]                                             | 2.79817358   | 0.846125733  | 1.264914861  | 3.217449209 |
| ENSORLG00000006711  | placd2                | phosphatidylinositol-specific phospholipase C, X domain containing 2 [Source:ZFIN,Acc:ZDB-GENE-091204-217] | 2.36016214   | 2.290288666  | 2.993139407  | 3.063503391 |
| ENSORLG00000001053  | -                     | -                                                                                                          | 3.858310852  | 1.488607776  | 0.845360503  | 3.12550088  |
| ENSORLG00000015081  | ciapin1               | cytokine induced apoptosis inhibitor 1 [Source:NCBI gene:Acc-101167114]                                    | 1.674532552  | -0.062119747 | 1.664815216  | 3.401952508 |
| ENSORLG00000008862  | cep112                | centrosomal protein 112 [Source:ZFIN,Acc:ZDB-GENE-120104-2]                                                | 0.123583392  | -0.776594915 | 2.279970247  | 3.180633751 |
| ENSORLG000000010158 | scata18               | spermatogenesis associated 18 [Source:ZFIN,Acc:ZDB-GENE-050522-306]                                        | 2.32601068   | 0.063562441  | 2.10827327   | 4.371206464 |
| ENSORLG00000014949  | bbs2                  | Bardet-Biedl syndrome 2 [Source:ZFIN,Acc:ZDB-GENE-020801-1]                                                | 1.133942455  | -0.240239512 | 1.951755453  | 3.326422319 |
| ENSORLG00000006879  | carnap2a              | calmodulin regulated spectrin-associated protein family, member 2a [Source:ZFIN,Acc:ZDB-GENE-030131-3016]  | 0.56851256   | -1.040065567 | 2.113234168  | 3.722297359 |
| ENSORLG00000014131  | -                     | -                                                                                                          | 1.226304753  | 0.255161401  | 2.193619158  | 3.165247487 |
| ENSORLG00000013927  | -                     | -                                                                                                          | 0.662714462  | -0.758439387 | 1.583138512  | 3.004778849 |
| ENSORLG00000011794  | -                     | -                                                                                                          | 1.433698931  | -0.17504985  | 1.639597445  | 3.22076918  |
| ENSORLG00000001219  | col7a1                | collagen, type VII, alpha 1 [Source:ZFIN,Acc:ZDB-GENE-030131-2427]                                         | 4.62146105   | 3.696965024  | 2.297620014  | 3.22258423  |
| ENSORLG00000011343  | fam124b               | family with sequence similarity 124B [Source:ZFIN,Acc:ZDB-GENE-130327-1]                                   | 1.829121316  | 0.425177232  | 2.977823223  | 4.382252718 |
| ENSORLG00000012073  | casp2                 | caspase 2, apoptosis-related cysteine peptidase [Source:ZFIN,Acc:ZDB-GENE-030825-3]                        | 2.365061641  | 0.347505897  | 1.267317359  | 3.285357923 |
| ENSORLG00000004950  | ctnn3a1               | catenin 3a, tandem duplicate 1 [Source:ZFIN,Acc:ZDB-GENE-081030-10]                                        | 3.01305448   | 1.094256275  | 1.343669451  | 3.262949015 |
| ENSORLG00000010853  | rtn4r2a               | reticulon-4 receptor-like 2 [Source:NCBI gene:Acc-101165094]                                               | 3.599441101  | 0.310230629  | 0.244514949  | 3.534210061 |
| ENSORLG00000009006  | hdac3                 | histone deacetylase 3 [Source:NCBI gene:Acc-101165094]                                                     | 2.170544817  | 0.213254879  | 1.156840095  | 3.11461491  |
| ENSORLG00000010964  | thox8                 | H-to-hex troxin 8 [Source:NCBI gene:Acc-101166195]                                                         | 1.521081961  | 0.717903507  | 2.789350692  | 3.593014064 |
| ENSORLG00000004115  | -                     | -                                                                                                          | 1.942379325  | 2.236339477  | 1.217448133  | 4.336869971 |
| ENSORLG00000002745  | si ch73-139e5         | si ch73-139e5 2 [Source:ZFIN,Acc:ZDB-GENE-130631-471]                                                      | 5.380297738  | 2.062737544  | 0.671792146  | 3.989840551 |
| ENSORLG00000007589  | -                     | -                                                                                                          | 1.310857549  | -0.00060899  | 1.738990449  | 3.050931978 |
| ENSORLG00000007646  | ortac1b               | cartilage acidic protein 1b [Source:ZFIN,Acc:ZDB-GENE-090312-28]                                           | 14.94188117  | 0            | 0.86330219   | 15.80567496 |
| ENSORLG0000003182   | syn1                  | synapsin I [Source:ZFIN,Acc:ZDB-GENE-081105-98]                                                            | 2.257899561  | -0.392382501 | 1.427386985  | 4.078141604 |
| ENSORLG0000003834   | WIP1                  | WD repeat domain phosphoinositide interacting 1 [Source:HGNC Symbol,Acc:HGNC:25471]                        | 1.885598161  | -0.012725764 | 2.434547149  | 4.33356194  |
| ENSORLG00000004467  | -                     | -                                                                                                          | 2.12525028   | -0.095268781 | 1.623546007  | 3.841848007 |
| ENSORLG00000006294  | -                     | -                                                                                                          | 1.91054746   | 0.11524322   | 2.580894432  | 4.336869971 |
| ENSORLG00000003474  | nrtd1b                | naradiysin D (N-arginine dibasic convertase) [Source:ZFIN,Acc:ZDB-GENE-050208-422]                         | 2.956136161  | 0.33919282   | 1.233091857  | 3.850521172 |
| ENSORLG00000006155  | esm1                  | endothelial cell-specific molecule 1 [Source:ZFIN,Acc:ZDB-GENE-060929-748]                                 | 2.993509394  | 1.39582784   | 1.660900113  | 3.259063467 |
| ENSORLG00000006753  | -                     | -                                                                                                          | 4.426121616  | 1.425890439  | 0.788020389  | 3.768734357 |
| ENSORLG00000009752  | elov5                 | ELCV, lity acid elongase 5 [Source:NCBI gene:Acc-101168981]                                                | 3.395848626  | 1.496985454  | 2.766783816  | 4.664130845 |
| ENSORLG00000011750  | -                     | -                                                                                                          | 3.481437591  | 1.067221763  | 2.325158248  | 4.739857945 |
| ENSORLG00000004813  | AKT3                  | AK1 serine/threonine kinase 3 [Source:HGNC Symbol,Acc:HGNC:3893]                                           | 1.428806683  | -0.421838298 | 2.23409931   | 4.085228945 |
| ENSORLG00000010959  | -                     | -                                                                                                          | 2.37422303   | 1.26999012   | 2.304093162  | 3.412010786 |
| ENSORLG00000013178  | -                     | -                                                                                                          | 1.069319922  | -3.755262386 | -1.594942239 | 3.230128288 |
| ENSORLG00000006643  | slc12a5a              | solute carrier family 12 (potassium/chloride transporter), member 5a [Source:ZFIN,Acc:ZDB-GENE-120927-3]   | 1.596084282  | -0.599158767 | 1.140582171  | 3.33631063  |
| ENSORLG00000006737  | cyp21                 | cytochrome P450, family 2, subfamily R, polypeptide 1 [Source:ZFIN,Acc:ZDB-GENE-110114-1]                  | 2.520897864  | -1.240897159 | 1.236310945  | 4.998589963 |
| ENSORLG00000007398  | pp2z2ba               | protein phosphatase 2, regulatory subunit B, beta a [Source:ZFIN,Acc:ZDB-GENE-101026-5]                    | 2.399724354  | 1.232752003  | 2.480450799  | 3.647910691 |

|                     |                |                                                                                                                  |              |              |              |             |
|---------------------|----------------|------------------------------------------------------------------------------------------------------------------|--------------|--------------|--------------|-------------|
| ENSORLG00000009733  | rgnl1          | regulator of G protein signaling 11 [Source:ZFIN,Acc:ZDB-GENE-080220-48]                                         | 3.635347953  | 2.425403686  | 2.017357908  | 3.227782668 |
| ENSORLG00000013678  | rdpor2         | rhodopsin receptor 2 [Source:ZFIN,Acc:ZDB-GENE-041210-60]                                                        | 2.853946413  | 0.815583115  | 1.531629203  | 3.570477486 |
| ENSORLG0000002068   | si.ch211-14507 | si.ch211-14507.3 [Source:ZFIN,Acc:ZDB-GENE-061207-6]                                                             | 8.955826273  | 4.564742808  | 2.29394788   | 6.685494901 |
| ENSORLG0000002280   | -              | -                                                                                                                | 1.183159003  | -0.178780585 | 1.922880009  | 3.285291369 |
| ENSORLG0000002388   | -              | -                                                                                                                | 0.965405877  | -4.69465389  | -0.873202562 | 4.787348689 |
| ENSORLG00000013991  | RAP1GAP        | RAP1 GTPase activating protein [Source:HGNC Symbol,Acc:HGNC:9858]                                                | 3.202083     | 1.8593034    | 2.518311115  | 3.861578646 |
| ENSORLG00000007741  | got1           | glutamic-oxaloacetic transaminase 1, soluble [Source:ZFIN,Acc:ZDB-GENE-040426-2003]                              | 1.005572665  | -0.800897464 | 2.494810111  | 4.301765532 |
| ENSORLG00000013110  | gss7a          | growth arrest-specific 7a [Source:ZFIN,Acc:ZDB-GENE-130128-1]                                                    | 2.30288449   | -0.360127593 | 0.524857899  | 3.188355104 |
| ENSORLG00000008815  | setd9          | SET domain containing 9 [Source:NCBI gene,Acc:101184580]                                                         | 1.875290739  | 1.191809124  | 2.361969871  | 3.045936611 |
| ENSORLG00000000462  | -              | -                                                                                                                | 2.572734975  | 0.102087534  | 0.654029187  | 3.125161703 |
| ENSORLG00000007255  | lman2a         | lectin, mannose-binding 2-like a [Source:ZFIN,Acc:ZDB-GENE-040715-4]                                             | 1.807221964  | 0.128919517  | 1.393233157  | 3.072021254 |
| ENSORLG00000004826  | pros1          | protein S [Source:ZFIN,Acc:ZDB-GENE-061013-657]                                                                  | -0.223947724 | -3.470149937 | 0.24582025   | 3.49250778  |
| ENSORLG00000009031  | PAX3           | paired box 3 [Source:HGNC Symbol,Acc:HGNC:8617]                                                                  | 2.441601099  | -11.55178996 | 2.797042398  | 16.79049025 |
| ENSORLG00000004395  | rfap36         | flagella associated protein 36 [Source:ZFIN,Acc:ZDB-GENE-060421-8162]                                            | 1.207103087  | 0.057041299  | 2.690978401  | 3.841525295 |
| ENSORLG00000021781  | -              | -                                                                                                                | 2.074702671  | 0.643766257  | 1.611545516  | 3.042966626 |
| ENSORLG00000014869  | cyt2h13 (1 of  | cytochrome P450, family 2, subfamily N, polypeptide 13 [Source:ZFIN,Acc:ZDB-GENE-041001-158]                     | 2.012197323  | 0.6803419    | 1.895802351  | 3.228142679 |
| ENSORLG00000007832  | klf4           | KAROS family zinc finger 4 [Source:ZFIN,Acc:ZDB-GENE-180319-1]                                                   | 4.700483621  | 2.269319074  | 2.301627827  | 4.733279206 |
| ENSORLG00000004527  | -              | -                                                                                                                | 1.155819167  | -0.836330068 | 1.976046702  | 3.768688859 |
| ENSORLG00000004052  | -              | -                                                                                                                | 2.910514997  | 0.374955977  | 0.478282638  | 3.014326621 |
| ENSORLG00000021688  | rf00409        | -                                                                                                                | 1.141367907  | -12.2245263  | 2.975643459  | 16.34208444 |
| ENSORLG00000006066  | RAB28          | RAB28, member RAS oncogene family [Source:NCBI gene,Acc:101166561]                                               | 2.79200953   | 0.9417344    | 2.971671621  | 4.822431701 |
| ENSORLG00000008899  | gfod2          | glucose-fructose oxidoreductase domain containing 2 [Source:ZFIN,Acc:ZDB-GENE-061103-64]                         | 2.288785652  | 0.679927941  | 1.408820523  | 3.018163161 |
| ENSORLG00000005222  | smap2          | small ARF47 [Source:ZFIN,Acc:ZDB-GENE-060503-374]                                                                | 4.740979087  | 3.246116881  | 1.587865997  | 3.083211032 |
| ENSORLG00000003222  | rfap57         | flagella associated protein 57 [Source:ZFIN,Acc:ZDB-GENE-110411-266]                                             | 5.781193249  | 1.824371758  | 2.982422469  | 6.939727494 |
| ENSORLG00000007348  | setu           | Oryzias latipes selenoprotein U (setu), mRNA [Source:RefSeq mRNA,Acc:NM_001193545]                               | 2.164214284  | -1.142686633 | -0.000163222 | 3.307222486 |
| ENSORLG000000007532 | vst11          | vesicle amine transport 1 like [Source:NCBI gene,Acc:101162437]                                                  | 2.645862378  | 1.916396663  | 2.561336147  | 3.291281512 |
| ENSORLG00000002099  | RF00045        | small nucleolar RNA SNORA73 family [Source:NCBI gene,Acc:111947163]                                              | 15.09758199  | 12.96485345  | 1.161906461  | 3.05102241  |
| ENSORLG00000012111  | mett4          | methyltransferase like 4 [Source:ZFIN,Acc:ZDB-GENE-130129-2]                                                     | 1.027089915  | -1.075663752 | 0.962813389  | 3.066052023 |
| ENSORLG00000001729  | calm4a         | calmodulin-like 4a [Source:ZFIN,Acc:ZDB-GENE-081022-9]                                                           | 2.885806503  | -0.459665047 | 0.101144645  | 3.447101251 |
| ENSORLG000000014280 | nrp8tr         | neuropeptide Y receptor Y8b [Source:ZFIN,Acc:ZDB-GENE-980526-208]                                                | 2.583413502  | -1.484796747 | -0.066832539 | 4.001664183 |
| ENSORLG00000015367  | rbm41          | RNA binding motif protein 41 [Source:ZFIN,Acc:ZDB-GENE-041114-107]                                               | 2.297072363  | 0.049518913  | 1.07622796   | 3.324266238 |
| ENSORLG00000014632  | -              | -                                                                                                                | 2.110808076  | 0.537085171  | 1.450587444  | 3.024804892 |
| ENSORLG00000005090  | dennd4c        | DENND4D domain containing 4c [Source:ZFIN,Acc:ZDB-GENE-120727-13]                                                | 1.887260864  | 0.109280107  | 1.662228956  | 3.440694748 |
| ENSORLG00000018000  | atacyb         | ataxia, cerebellar, Cayman type b [Source:ZFIN,Acc:ZDB-GENE-070912-200]                                          | 3.400816216  | 0.861066024  | 0.644911116  | 3.185145135 |
| ENSORLG00000011789  | mpg5b          | membrane palmitoylated protein 5 [Source:NCBI gene,Acc:101164939]                                                | 0.966478206  | -0.784382032 | 2.819447649  | 4.570792888 |
| ENSORLG00000015006  | cap89          | centrosomal protein 89 [Source:ZFIN,Acc:ZDB-GENE-040426-1210]                                                    | 3.209480888  | 1.046369935  | 1.24116133   | 3.404754534 |
| ENSORLG00000017726  | -              | -                                                                                                                | 1.741144308  | 0.122762811  | 2.293676897  | 3.912543436 |
| ENSORLG00000018117  | -              | -                                                                                                                | 2.560736883  | 0.719899817  | 1.585738119  | 3.4270599   |
| ENSORLG00000008648  | ft172          | intraflagellar transport 172 [Source:NCBI gene,Acc:101174877]                                                    | 2.242145642  | -0.172033673 | 1.055431049  | 3.470095154 |
| ENSORLG000000005140 | zgc:136564     | chromosome 9 Cpor64 homolog [Source:NCBI gene,Acc:101169613]                                                     | -1.066782641 | -1.903125258 | 2.512000385  | 3.348888099 |
| ENSORLG00000009879  | trnm46a        | tripartite motif containing 46a [Source:ZFIN,Acc:ZDB-GENE-110825-1]                                              | 2.041944114  | -1.15725591  | 1.55729395   | 4.75697806  |
| ENSORLG00000014269  | porcn          | porcupine O-acyltransferase [Source:ZFIN,Acc:ZDB-GENE-081108-87]                                                 | 13.49693565  | 11.07352571  | 2.295472951  | 4.719405275 |
| ENSORLG00000006795  | -              | -                                                                                                                | 2.383758203  | 0.256001274  | 1.269386261  | 3.397528415 |
| ENSORLG00000014218  | maco1a         | macoalin-1 [Source:NCBI gene,Acc:101174517]                                                                      | 1.318424177  | -0.034018675 | 1.873003799  | 3.225931423 |
| ENSORLG00000009029  | -              | -                                                                                                                | 14.63172615  | 11.64354057  | 2.329814549  | 5.314469228 |
| ENSORLG00000017919  | e2f5           | E2F transcription factor 5 [Source:ZFIN,Acc:ZDB-GENE-030828-3]                                                   | 2.772556645  | 0.157719511  | 0.698465884  | 3.313787941 |
| ENSORLG00000014062  | slc22a16       | solute carrier family 22 (organic cation/carnitine transporter), member 16 [Source:ZFIN,Acc:ZDB-GENE-041001-166] | 1.266923416  | -0.277569079 | 2.490945587  | 4.03592306  |
| ENSORLG00000012060  | spata6l        | spermatogenesis associated 6-like [Source:ZFIN,Acc:ZDB-GENE-040426-1369]                                         | 13.86816085  | 11.63145902  | 2.794572705  | 5.021739192 |
| ENSORLG00000014512  | -              | -                                                                                                                | 14.20276438  | 11.40640699  | 2.296399135  | 5.095222028 |
| ENSORLG00000017845  | chrm5b         | cholinergic receptor, muscarinic 5b [Source:ZFIN,Acc:ZDB-GENE-041001-169]                                        | 4.786171629  | 2.266977056  | 0.626158777  | 3.145300324 |
| ENSORLG00000021729  | RF00231        | small Cajal body-specific RNA 13 [Source:NCBI gene,Acc:111947124]                                                | 1.082278042  | -0.758748597 | 1.576287992  | 3.417799689 |
| ENSORLG00000015575  | eml1           | ectoderm microtubule associated protein like 1 [Source:ZFIN,Acc:ZDB-GENE-060929-156]                             | 2.263729299  | 0.679257557  | 1.564999966  | 3.14994616  |
| ENSORLG00000015707  | -              | -                                                                                                                | 4.105824198  | 3.055208208  | 2.642469855  | 3.893568829 |
| ENSORLG00000005234  | carmsap1a      | calmodulin regulated spectrin-associated protein 1a [Source:ZFIN,Acc:ZDB-GENE-060518-4]                          | 2.527961512  | 0.85749717   | 2.444135504  | 4.115088661 |
| ENSORLG00000014929  | dmnb2          | dynamin 2b [Source:ZFIN,Acc:ZDB-GENE-040426-2371]                                                                | 2.578099873  | 0.122068834  | 0.577603482  | 3.054112507 |
| ENSORLG0000002569   | -              | -                                                                                                                | 1.503973824  | 0.169672638  | 2.097510237  | 3.432296381 |
| ENSORLG00000027885  | -              | -                                                                                                                | 4.281641067  | -8.549168865 | 2.491288586  | 15.07667996 |
| ENSORLG00000020281  | capn5a         | histone-lysine N-methyltransferase SETD1A-8 [Source:NCBI gene,Acc:101162613]                                     | 0.160732048  | -0.777884331 | 0.757897472  | 3.534888807 |
| ENSORLG0000001160   | -              | -                                                                                                                | 13.42331685  | 11.282295    | 2.342398468  | 4.483888488 |
| ENSORLG00000007181  | p4k2ab         | phosphatidylinositol-5-phosphate 4-kinase, type II, alpha b [Source:ZFIN,Acc:ZDB-GENE-070912-272]                | 1.718250311  | 0.659583909  | 2.29620071   | 3.355352022 |
| ENSORLG00000011674  | PLPFR1         | phospholipid phosphatase related 1 [Source:HGNC Symbol,Acc:HGNC:79993]                                           | 3.120829591  | 0.188378514  | 1.274097153  | 4.207032272 |
| ENSORLG00000015688  | -              | -                                                                                                                | 3.453238688  | 1.675362124  | 2.355939627  | 4.134315094 |
| ENSORLG00000021524  | RF00319        | small nucleolar RNA SNORA23 [Source:NCBI gene,Acc:111946815]                                                     | 2.481347869  | -0.787163013 | 1.892289301  | 5.161280454 |
| ENSORLG00000003277  | ankra2         | ankyrin repeat family A member 2 [Source:NCBI gene,Acc:101158120]                                                | 1.210863563  | -0.301625134 | 1.67339624   | 3.186396834 |
| ENSORLG00000004338  | wfhag2         | tyrosine 3-monooxygenase/tryptophan 5-monooxygenase activation protein gamma [Source:NCBI gene,Acc:101160253]    | 2.852693127  | 0.475617916  | 0.755613135  | 3.133172149 |
| ENSORLG00000000404  | -              | -                                                                                                                | 1.793733815  | 0.469522098  | 2.476476774  | 3.801178959 |
| ENSORLG00000001070  | slc38a3a       | solute carrier family 38, member 3a [Source:ZFIN,Acc:ZDB-GENE-070815-25]                                         | 14.95961169  | 10.57437592  | 1.661294229  | 6.047002731 |
| ENSORLG00000009199  | dnajp12b       | DnaJ heat shock protein family (Hsp40) member B12 [Source:NCBI gene,Acc:101160360]                               | 14.11549483  | 12.80688992  | 1.975220006  | 3.284291739 |
| ENSORLG00000017722  | -              | -                                                                                                                | 12.97924476  | 0            | 2.672724063  | 15.65246017 |

|                      |         |                                                                                                        |              |              |              |             |
|----------------------|---------|--------------------------------------------------------------------------------------------------------|--------------|--------------|--------------|-------------|
| ENSORLG00000002115   | -       | -                                                                                                      | 5.553356132  | 4.213332067  | 1.933990177  | 3.274508531 |
| ENSORLG00000001897   | -       | -                                                                                                      | 3.023202745  | 0.496804364  | 0.545268274  | 3.072152173 |
| ENSORLG00000005643   | klf4    | Kruppel-like factor 4 [Source:ZFIN;Acc:ZDB-GENE-1111014-11]                                            | 2.621013289  | -0.132406069 | 1.14906219   | 3.902966087 |
| ENSORLG000000011558  | -       | -                                                                                                      | 2.3964969    | 1.842374541  | 2.581107373  | 3.135715358 |
| ENSORLG00000006790   | spock2  | SPARC (osteonectin), ovov and kazal like domains proteoglycan 2 [Source:ZFIN;Acc:ZDB-GENE-090312-170]  | 1.9051475    | -0.948458889 | 1.495765476  | 4.349861693 |
| ENSORLG00000006677   | b4galt4 | beta-4-galactosyltransferase polypeptide 4 [Source:ZFIN;Acc:ZDB-GENE-0411114-004]                      | 2.607774517  | 0.979639009  | 2.684031245  | 4.312651772 |
| ENSORLG000000008530  | camkvl  | CaM kinase-like vesicle-associated, like [Source:ZFIN;Acc:ZDB-GENE-090311-58]                          | 14.73242874  | 12.44358852  | 1.081253306  | 3.370561539 |
| ENSORLG000000011245  | epb81a  | epb81-like 1a [Source:ZFIN;Acc:ZDB-GENE-050306-14]                                                     | 6.456052442  | 1.778003405  | 0.760607653  | 5.439119289 |
| ENSORLG000000010171  | trpc1   | transient receptor potential cation channel, subfamily C, member 1 [Source:ZFIN;Acc:ZDB-GENE-070830-1] | -0.674776901 | -2.514490055 | 2.618970691  | 4.45906294  |
| ENSORLG000000012843  | -       | -                                                                                                      | 0.772909858  | -0.415459713 | 2.070228993  | 3.258083495 |
| ENSORLG00000007936   | -       | -                                                                                                      | 2.027127517  | 0.832346138  | 2.588748647  | 3.784014826 |
| ENSORLG000000001255  | -       | -                                                                                                      | 2.445709951  | 0.166238688  | 2.518630919  | 4.798597106 |
| ENSORLG000000009203  | -       | -                                                                                                      | 3.830419877  | -0.838018027 | 1.4402013384 | 3.884438743 |
| ENSORLG000000007908  | -       | -                                                                                                      | 0.419773955  | -0.70466593  | 2.485585757  | 3.610510436 |
| ENSORLG000000007751  | acacb   | acetyl-CoA carboxylase beta [Source:ZFIN;Acc:ZDB-GENE-060526-132]                                      | 2.151306933  | 0.596848065  | 1.603228164  | 3.15817227  |
| ENSORLG0000000013163 | -       | -                                                                                                      | 3.168868744  | 0.163243052  | 1.460915899  | 4.465025971 |
| ENSORLG000000012824  | klhdc2  | kelch domain containing 2 [Source:ZFIN;Acc:ZDB-GENE-070410-69]                                         | 1.811449406  | -0.144402359 | 1.131236337  | 3.087573102 |
| ENSORLG00000000969   | adcy6b  | adenylylate cyclase B [Source:ZFIN;Acc:ZDB-GENE-090127-21]                                             | 3.029013452  | 1.267004359  | 2.191983924  | 3.954477806 |
| ENSORLG000000014319  | klh122  | kelch-like family member 22 [Source:ZFIN;Acc:ZDB-GENE-081104-154]                                      | 2.458892587  | 0.592293624  | 1.795380524  | 3.662464538 |
| ENSORLG000000009064  | -       | -                                                                                                      | 2.506591621  | 1.185204572  | 2.202695787  | 3.523569900 |
| ENSORLG000000016845  | wdr26b  | WD repeat domain 26b [Source:ZFIN;Acc:ZDB-GENE-041014-277]                                             | 1.894004789  | 0.08623983   | 1.571106158  | 3.379355914 |
| ENSORLG000000003896  | brpf3a  | bromodomain and PHD finger containing, 3a [Source:ZFIN;Acc:ZDB-GENE-130530-730]                        | 1.85609726   | -0.112759879 | 1.289512157  | 3.258853984 |
| ENSORLG000000004490  | vgl14b  | vestibular-like family member 4b [Source:ZFIN;Acc:ZDB-GENE-040406-2443]                                | 2.871547411  | -0.226487882 | -0.057031009 | 3.041489263 |
| ENSORLG000000015817  | rtm1a   | reticulon 1 [Source:NCBI;Gene:Acc:101155557]                                                           | 2.768196371  | 0.619749901  | 1.997917555  | 4.146848926 |
| ENSORLG000000016230  | cipca   | CLOCK-interacting pacemaker a [Source:ZFIN;Acc:ZDB-GENE-120509-3]                                      | 2.072938155  | -0.192021755 | 1.856273227  | 4.121718001 |
| ENSORLG000000018008  | tube1   | tubulin eselon 1 [Source:NCBI;Gene:Acc:105357241]                                                      | -0.297772637 | -0.742920146 | 2.790949469  | 3.23658227  |
| ENSORLG00000000342   | flr     | fler [Source:ZFIN;Acc:ZDB-GENE-070117-2066]                                                            | 1.116766201  | -0.551672773 | 1.533809365  | 3.20773275  |
| ENSORLG000000011665  | scot8   | acyl-CoA thioesterase 8 [Source:ZFIN;Acc:ZDB-GENE-041010-174]                                          | 2.947690981  | 0.059010127  | 0.172796252  | 3.061962023 |

Table S2. The details of relative RNA expressions quantified by mean TPMs

| gene           | RNA-seq MeanTPM |             |             |            |            |            |            |            |             |           |           |            |
|----------------|-----------------|-------------|-------------|------------|------------|------------|------------|------------|-------------|-----------|-----------|------------|
|                | WTO             | WTO         | averageWTO  | HmO        | HmO        | averageHmO | HmT        | HmT        | averageHmT  | WTT       | WTT       | averageWTT |
| <i>dynll2</i>  | 1654.542847     | 1654.522705 | 1654.532776 | 2491.56982 | 2491.61157 | 2491.5907  | 216.537933 | 216.612503 | 216.575218  | 21.138573 | 21.138496 | 21.1385345 |
| <i>nanos3</i>  | 74.249474       | 74.248573   | 74.2490235  | 75.266609  | 75.267868  | 75.2672385 | 3.006331   | 3.007367   | 3.006849    | 8.113937  | 8.113908  | 8.1139225  |
| <i>igf2bp3</i> | 106.600914      | 106.599617  | 106.6002655 | 96.797195  | 96.798828  | 96.7980115 | 6.987148   | 6.989555   | 6.9883515   | 10.473875 | 10.473838 | 10.4738565 |
| <i>sycp1</i>   | 0.987137        | 0.987125    | 0.987131    | 19.553797  | 19.554125  | 19.553961  | 341.741211 | 341.858887 | 341.800049  | 0.087868  | 0.087868  | 0.087868   |
| <i>sycp3</i>   | 3.209434        | 3.209395    | 3.2094145   | 13.548008  | 13.548236  | 13.548122  | 1195.81384 | 1196.22559 | 1196.01971  | 36.060265 | 36.060135 | 36.0602    |
| <i>sycp3l</i>  | 0.836214        | 0.836204    | 0.836209    | 6.428904   | 6.429011   | 6.4289575  | 692.36145  | 692.599915 | 692.4806825 | 75.624466 | 75.624199 | 75.6243325 |
| <i>dnaaf1</i>  | 0.591493        | 0.591485    | 0.591489    | 0.908715   | 0.908731   | 0.908723   | 214.024719 | 214.098434 | 214.061577  | 5.136553  | 5.136535  | 5.136544   |
| <i>fkbp7</i>   | 0.85495         | 0.854939    | 0.8549445   | 7.868912   | 7.869044   | 7.868978   | 100.362503 | 100.397072 | 100.3797875 | 11.918123 | 11.91808  | 11.9181015 |
| <i>smc1b</i>   | 1.148499        | 1.148485    | 1.148492    | 4.136409   | 4.136478   | 4.1364435  | 400.527679 | 400.665619 | 400.596649  | 73.833267 | 73.833    | 73.8331335 |
| <i>nanos2</i>  | 0.0001          | 0.0001      | 0.0001      | 0.0001     | 0.0001     | 0.0001     | 16.289652  | 16.295261  | 16.2924565  | 13.118932 | 13.118885 | 13.1189085 |

| MeanTPM        | WTO         | HmO         | HmT         | WTT        |
|----------------|-------------|-------------|-------------|------------|
| <i>dynll2</i>  | 1654.532776 | 2491.590698 | 216.575218  | 21.1385345 |
| <i>nanos3</i>  | 74.2490235  | 75.2672385  | 3.006849    | 8.1139225  |
| <i>igf2bp3</i> | 106.6002655 | 96.7980115  | 6.9883515   | 10.4738565 |
| <i>sycp1</i>   | 0.987131    | 19.553961   | 341.800049  | 0.087868   |
| <i>sycp3</i>   | 3.2094145   | 13.548122   | 1196.019715 | 36.0602    |
| <i>sycp3l</i>  | 0.836209    | 6.4289575   | 692.4806825 | 75.6243325 |
| <i>dnaaf1</i>  | 0.591489    | 0.908723    | 214.0615765 | 5.136544   |
| <i>fkbp7</i>   | 0.8549445   | 7.868978    | 100.3797875 | 11.9181015 |
| <i>smc1b</i>   | 1.148492    | 4.1364435   | 400.596649  | 73.8331335 |
| <i>nanos2</i>  | 0.0001      | 0.0001      | 16.2924565  | 13.1189085 |

| log2MeanTPM    | WTO          | HmO          | HmT         | WTT          |
|----------------|--------------|--------------|-------------|--------------|
| <i>dynll2</i>  | 10.69220816  | 11.28285138  | 7.758724359 | 4.401803455  |
| <i>nanos3</i>  | 6.214300147  | 6.233950136  | 1.588252419 | 3.020399523  |
| <i>igf2bp3</i> | 6.736067221  | 6.596905506  | 2.804952175 | 3.388720839  |
| <i>sycp1</i>   | -0.018686541 | 4.289388975  | 8.417008794 | -3.508518333 |
| <i>sycp3</i>   | 1.682310128  | 3.760020978  | 10.22402545 | 5.172335493  |
| <i>sycp3l</i>  | -0.258064524 | 2.684584814  | 9.435630016 | 6.240778598  |
| <i>dnaaf1</i>  | -0.75757676  | -0.1380875   | 7.741882049 | 2.360798003  |
| <i>fkbp7</i>   | -0.226097327 | 2.976176275  | 6.649324987 | 3.575082534  |
| <i>smc1b</i>   | 0.199740807  | 2.048390876  | 8.646006543 | 6.206196483  |
| <i>nanos2</i>  | -13.28771238 | -13.28771238 | 4.026132238 | 3.713575787  |

**Table S3. Rawdata of real-time qPCR quantification**

| <i>fshr-qfw1 qrv2</i> |    |         |                |            |                                  |         |         |       |
|-----------------------|----|---------|----------------|------------|----------------------------------|---------|---------|-------|
| Descriptives          |    |         |                |            | Multiple Comparisons             |         |         |       |
| tissue                | N  | Mean    | Std. Deviation | Std. Error | 95% Confidence Interval for Mean | Minimum | Maximum |       |
|                       |    |         |                |            | Bound                            | Bound   |         |       |
| WTO                   | 3  | 0.8993  | 0.09425        | 0.05442    | 0.6652                           | 1.1334  | 0.81    | 1.00  |
| WTT                   | 3  | 13.0541 | 0.55760        | 0.32193    | 11.6690                          | 14.4393 | 12.50   | 13.61 |
| HmO                   | 3  | 2.2024  | 0.33668        | 0.19438    | 1.3660                           | 3.0387  | 1.83    | 2.48  |
| HmT                   | 3  | 17.8113 | 3.44067        | 1.98647    | 9.2642                           | 26.3585 | 14.49   | 21.36 |
| Total                 | 12 | 8.4918  | 7.62268        | 2.20048    | 3.6486                           | 13.3350 | 0.81    | 21.36 |

  

| Multiple Comparisons                    |           |           |                       |            |       |                         |          |
|-----------------------------------------|-----------|-----------|-----------------------|------------|-------|-------------------------|----------|
| Dependent Variable: Relative expression |           |           |                       |            |       |                         |          |
|                                         | (I)tissue | (J)tissue | Mean Difference (I-J) | Std. Error | Sig.  | 95% Confidence Interval |          |
|                                         |           |           |                       |            |       | Bound                   | Bound    |
| LSD                                     | WTO       | WTT       | -12.15481*            | 1.43012    | 0.000 | -15.4527                | -8.8570  |
|                                         |           | HmO       | -1.30306              | 1.43012    | 0.389 | -4.6009                 | 1.9948   |
|                                         |           | HmT       | -16.91203*            | 1.43012    | 0.000 | -20.2099                | -13.6142 |
|                                         | WTT       | WTO       | 12.15481*             | 1.43012    | 0.000 | 8.8570                  | 15.4527  |
|                                         |           | HmO       | 10.85175*             | 1.43012    | 0.000 | 7.5539                  | 14.1496  |
|                                         |           | HmT       | -4.75722*             | 1.43012    | 0.010 | -8.0551                 | -1.4594  |
|                                         | HmO       | WTO       | 1.30306               | 1.43012    | 0.389 | -1.9948                 | 4.6009   |
|                                         |           | WTT       | -10.85175*            | 1.43012    | 0.000 | -14.1496                | -7.5539  |
|                                         |           | HmT       | -15.60897*            | 1.43012    | 0.000 | -18.9068                | -12.3111 |
|                                         | HmT       | WTO       | 16.91203*             | 1.43012    | 0.000 | 13.6142                 | 20.2099  |
|                                         |           | WTT       | 4.75722*              | 1.43012    | 0.010 | 1.4594                  | 8.0551   |
|                                         |           | HmO       | 15.60897*             | 1.43012    | 0.000 | 12.3111                 | 18.9068  |

\*. The mean difference is significant at the 0.05 level.

| <i>mIR202 -Fw1 RV2</i> |    |        |                |            |                                  |         |         |      |
|------------------------|----|--------|----------------|------------|----------------------------------|---------|---------|------|
| Descriptives           |    |        |                |            | Multiple Comparisons             |         |         |      |
| tissue                 | N  | Mean   | Std. Deviation | Std. Error | 95% Confidence Interval for Mean | Minimum | Maximum |      |
|                        |    |        |                |            | Bound                            | Bound   |         |      |
| WTO                    | 3  | 0.0150 | 0.00095        | 0.00055    | 0.0126                           | 0.0173  | 0.01    | 0.02 |
| WTT                    | 3  | 0.9469 | 0.06631        | 0.03828    | 0.7822                           | 1.1117  | 0.87    | 1.00 |
| HmO                    | 3  | 0.0138 | 0.00031        | 0.00018    | 0.0130                           | 0.0145  | 0.01    | 0.01 |
| HmT                    | 3  | 1.2402 | 0.11681        | 0.06744    | 0.9500                           | 1.5303  | 1.11    | 1.32 |
| Total                  | 12 | 0.5540 | 0.57674        | 0.16649    | 0.1875                           | 0.9204  | 0.01    | 1.32 |

  

| Multiple Comparisons                    |           |           |                       |            |       |                         |         |
|-----------------------------------------|-----------|-----------|-----------------------|------------|-------|-------------------------|---------|
| Dependent Variable: Relative expression |           |           |                       |            |       |                         |         |
|                                         | (I)tissue | (J)tissue | Mean Difference (I-J) | Std. Error | Sig.  | 95% Confidence Interval |         |
|                                         |           |           |                       |            |       | Bound                   | Bound   |
| LSD                                     | WTO       | WTT       | -.93197*              | 0.05484    | 0.000 | -1.0584                 | -0.8055 |
|                                         |           | HmO       | 0.00120               | 0.05484    | 0.983 | -0.1253                 | 0.1277  |
|                                         |           | HmT       | -1.22520*             | 0.05484    | 0.000 | -1.3517                 | -1.0987 |
|                                         | WTT       | WTO       | .93197*               | 0.05484    | 0.000 | 0.8055                  | 1.0584  |
|                                         |           | HmO       | .93317*               | 0.05484    | 0.000 | 0.8067                  | 1.0596  |
|                                         |           | HmT       | -.29323*              | 0.05484    | 0.001 | -0.4197                 | -0.1668 |
|                                         | HmO       | WTO       | -0.00120              | 0.05484    | 0.983 | -0.1277                 | 0.1253  |
|                                         |           | WTT       | -.93317*              | 0.05484    | 0.000 | -1.0596                 | -0.8067 |
|                                         |           | HmT       | -1.22640*             | 0.05484    | 0.000 | -1.3529                 | -1.0999 |
|                                         | HmT       | WTO       | 1.22520*              | 0.05484    | 0.000 | 1.0987                  | 1.3517  |
|                                         |           | WTT       | .29323*               | 0.05484    | 0.001 | 0.1668                  | 0.4197  |
|                                         |           | HmO       | 1.22640*              | 0.05484    | 0.000 | 1.0999                  | 1.3529  |

\*. The mean difference is significant at the 0.05 level.

| <i>mIR202-Fw1 RV3</i> |   |      |                |            |                                  |         |         |  |
|-----------------------|---|------|----------------|------------|----------------------------------|---------|---------|--|
| Descriptives          |   |      |                |            | Multiple Comparisons             |         |         |  |
| tissue                | N | Mean | Std. Deviation | Std. Error | 95% Confidence Interval for Mean | Minimum | Maximum |  |
|                       |   |      |                |            | Bound                            | Bound   |         |  |

  

| Multiple Comparisons                    |           |           |                       |            |      |                         |       |
|-----------------------------------------|-----------|-----------|-----------------------|------------|------|-------------------------|-------|
| Dependent Variable: Relative expression |           |           |                       |            |      |                         |       |
|                                         | (I)tissue | (J)tissue | Mean Difference (I-J) | Std. Error | Sig. | 95% Confidence Interval |       |
|                                         |           |           |                       |            |      | Bound                   | Bound |

|       | N  | Mean     | Std. Deviation | Std. Error | 95% Confidence Interval for Mean |          | Minimum | Maximum |
|-------|----|----------|----------------|------------|----------------------------------|----------|---------|---------|
|       |    |          |                |            | Bound                            | Bound    |         |         |
| WTO   | 3  | 0.9928   | 0.01877        | 0.01084    | 0.9462                           | 1.0395   | 0.97    | 1.01    |
| WTT   | 3  | 91.8090  | 8.89793        | 5.13722    | 69.7053                          | 113.9126 | 83.96   | 101.48  |
| HmO   | 3  | 1.2960   | 0.09214        | 0.05320    | 1.0671                           | 1.5249   | 1.23    | 1.40    |
| HmT   | 3  | 128.9333 | 16.18183       | 9.34258    | 88.7354                          | 169.1312 | 112.21  | 144.51  |
| Total | 12 | 55.7578  | 59.19227       | 17.08734   | 18.1488                          | 93.3668  | 0.97    | 144.51  |

|     | (I)tissue | (J)tissue | Mean Difference (I-J)   | Std. Error | Sig.  | 95% Confidence Interval |           |
|-----|-----------|-----------|-------------------------|------------|-------|-------------------------|-----------|
|     |           |           |                         |            |       | Bound                   | Bound     |
| LSD | WTO       | WTT       | -90.81612 <sup>*</sup>  | 7.53916    | 0.000 | -108.2015               | -73.4308  |
|     |           | HmO       | -0.30315                | 7.53916    | 0.969 | -17.6885                | 17.0822   |
|     |           | HmT       | -127.94051 <sup>*</sup> | 7.53916    | 0.000 | -145.3258               | -110.5552 |
|     |           | WTT       | 90.81612 <sup>*</sup>   | 7.53916    | 0.000 | 73.4308                 | 108.2015  |
|     |           | HmO       | 90.51297 <sup>*</sup>   | 7.53916    | 0.000 | 73.1276                 | 107.8983  |
|     |           | HmT       | -37.12438 <sup>*</sup>  | 7.53916    | 0.001 | -54.5097                | -19.7390  |
|     | HmO       | WTO       | 0.30315                 | 7.53916    | 0.969 | -17.0822                | 17.6885   |
|     |           | WTT       | -90.51297 <sup>*</sup>  | 7.53916    | 0.000 | -107.8983               | -73.1276  |
|     |           | HmT       | -127.63736 <sup>*</sup> | 7.53916    | 0.000 | -145.0227               | -110.2520 |
|     |           | WTO       | 127.94051 <sup>*</sup>  | 7.53916    | 0.000 | 110.5552                | 145.3258  |
|     |           | WTT       | 37.12438 <sup>*</sup>   | 7.53916    | 0.001 | 19.7390                 | 54.5097   |
|     |           | HmO       | 127.63736 <sup>*</sup>  | 7.53916    | 0.000 | 110.2520                | 145.0227  |

\*. The mean difference is significant at the 0.05 level.

### sycp1-qfw1 qrv2

| Descriptives |    |          |                |            |                                  |          |         |         |
|--------------|----|----------|----------------|------------|----------------------------------|----------|---------|---------|
| tissue       | N  | Mean     | Std. Deviation | Std. Error | 95% Confidence Interval for Mean |          | Minimum | Maximum |
|              |    |          |                |            | Bound                            | Bound    |         |         |
| WTO          | 3  | 1.0584   | 0.21097        | 0.12180    | 0.5343                           | 1.5824   | 0.88    | 1.29    |
| WTT          | 3  | 102.5576 | 15.21259       | 8.78299    | 64.7674                          | 140.3477 | 89.88   | 119.43  |
| HmO          | 3  | 1.1831   | 0.08517        | 0.04917    | 0.9715                           | 1.3947   | 1.09    | 1.25    |
| HmT          | 3  | 146.4302 | 27.73978       | 16.01557   | 77.5207                          | 215.3396 | 119.43  | 174.85  |
| Total        | 12 | 62.8073  | 67.79111       | 19.56961   | 19.7349                          | 105.8797 | 0.88    | 174.85  |

### Multiple Comparisons

| Dependent Variable: |           |           |                         |            |       |                         |           |
|---------------------|-----------|-----------|-------------------------|------------|-------|-------------------------|-----------|
|                     | (I)tissue | (J)tissue | Mean Difference (I-J)   | Std. Error | Sig.  | 95% Confidence Interval |           |
|                     |           |           |                         |            |       | Bound                   | Bound     |
| LSD                 | WTO       | WTT       | -101.49922 <sup>*</sup> | 12.91620   | 0.000 | -131.2840               | -71.7144  |
|                     |           | HmO       | -0.12473                | 12.91620   | 0.993 | -29.9096                | 29.6601   |
|                     |           | HmT       | -145.37182 <sup>*</sup> | 12.91620   | 0.000 | -175.1566               | -115.5870 |
|                     |           | WTT       | 101.49922 <sup>*</sup>  | 12.91620   | 0.000 | 71.7144                 | 131.2840  |
|                     |           | HmO       | 101.37448 <sup>*</sup>  | 12.91620   | 0.000 | 71.5897                 | 131.1593  |
|                     |           | HmT       | -43.87260 <sup>*</sup>  | 12.91620   | 0.009 | -73.6574                | -14.0878  |
|                     | HmO       | WTO       | 0.12473                 | 12.91620   | 0.993 | -29.6601                | 29.9096   |
|                     |           | WTT       | -101.37448 <sup>*</sup> | 12.91620   | 0.000 | -131.1593               | -71.5897  |
|                     |           | HmT       | -145.24708 <sup>*</sup> | 12.91620   | 0.000 | -175.0319               | -115.4623 |
|                     |           | WTO       | 145.37182 <sup>*</sup>  | 12.91620   | 0.000 | 115.5870                | 175.1566  |
|                     |           | WTT       | 43.87260 <sup>*</sup>   | 12.91620   | 0.009 | 14.0878                 | 73.6574   |
|                     |           | HmO       | 145.24708 <sup>*</sup>  | 12.91620   | 0.000 | 115.4623                | 175.0319  |

\*. The mean difference is significant at the 0.05 level.

### sycp3-qfw1 qrv2

| Descriptives |   |          |                |            |                                  |          |         |         |
|--------------|---|----------|----------------|------------|----------------------------------|----------|---------|---------|
| tissue       | N | Mean     | Std. Deviation | Std. Error | 95% Confidence Interval for Mean |          | Minimum | Maximum |
|              |   |          |                |            | Bound                            | Bound    |         |         |
| WTO          | 3 | 0.9828   | 0.05599        | 0.03233    | 0.8437                           | 1.1219   | 0.92    | 1.03    |
| WTT          | 3 | 183.9994 | 15.61559       | 9.01567    | 145.2081                         | 222.7907 | 166.57  | 196.72  |

### Multiple Comparisons

| Dependent Variable: |           |           |                         |            |       |                         |           |
|---------------------|-----------|-----------|-------------------------|------------|-------|-------------------------|-----------|
|                     | (I)tissue | (J)tissue | Mean Difference (I-J)   | Std. Error | Sig.  | 95% Confidence Interval |           |
|                     |           |           |                         |            |       | Bound                   | Bound     |
| LSD                 | WTO       | WTT       | -183.01665 <sup>*</sup> | 15.65159   | 0.000 | -219.1093               | -146.9240 |
|                     |           | HmO       | 0.02461                 | 15.65159   | 0.999 | -36.0680                | 36.1172   |

|       |    |          |           |          |          |          |        |        |
|-------|----|----------|-----------|----------|----------|----------|--------|--------|
| HmO   | 3  | 0.9582   | 0.17357   | 0.10021  | 0.5270   | 1.3893   | 0.84   | 1.16   |
| HmT   | 3  | 251.7009 | 35.01362  | 20.21512 | 164.7223 | 338.6796 | 229.13 | 292.04 |
| Total | 12 | 109.4103 | 117.13447 | 33.81381 | 34.9866  | 183.8340 | 0.84   | 292.04 |

|  |     |     |             |          |       |           |           |
|--|-----|-----|-------------|----------|-------|-----------|-----------|
|  |     | HmT | -250.71816* | 15.65159 | 0.000 | -286.8108 | -214.6255 |
|  | WTT | WTO | 183.01665*  | 15.65159 | 0.000 | 146.9240  | 219.1093  |
|  |     | HmO | 183.04125*  | 15.65159 | 0.000 | 146.9486  | 219.1339  |
|  |     | HmT | -67.70151*  | 15.65159 | 0.003 | -103.7941 | -31.6089  |
|  | HmO | WTO | -0.02461    | 15.65159 | 0.999 | -36.1172  | 36.0680   |
|  |     | WTT | -183.04125* | 15.65159 | 0.000 | -219.1339 | -146.9486 |
|  |     | HmT | -250.74277* | 15.65159 | 0.000 | -286.8354 | -214.6501 |
|  | HmT | WTO | 250.71816*  | 15.65159 | 0.000 | 214.6255  | 286.8108  |
|  |     | WTT | 67.70151*   | 15.65159 | 0.003 | 31.6089   | 103.7941  |
|  |     | HmO | 250.74277*  | 15.65159 | 0.000 | 214.6501  | 286.8354  |

\*. The mean difference is significant at the 0.05 level.

**dynll2-qfw3 qrv4**

| Descriptives |    |        |                |            |                                  |        |         |         |
|--------------|----|--------|----------------|------------|----------------------------------|--------|---------|---------|
| tissue       |    |        |                |            |                                  |        |         |         |
|              | N  | Mean   | Std. Deviation | Std. Error | 95% Confidence Interval for Mean |        | Minimum | Maximum |
|              |    |        |                |            | Bound                            | Bound  |         |         |
| WTO          | 3  | 1.0237 | 0.02972        | 0.01716    | 0.9498                           | 1.0975 | 1.00    | 1.06    |
| WTT          | 3  | 0.1027 | 0.00321        | 0.00185    | 0.0948                           | 0.1107 | 0.10    | 0.11    |
| HmO          | 3  | 0.7307 | 0.02557        | 0.01476    | 0.6671                           | 0.7942 | 0.71    | 0.76    |
| HmT          | 3  | 0.3223 | 0.02637        | 0.01522    | 0.2568                           | 0.3878 | 0.30    | 0.35    |
| Total        | 12 | 0.5448 | 0.37304        | 0.10769    | 0.3078                           | 0.7819 | 0.10    | 1.06    |

| Multiple Comparisons |           |           |                       |            |       |                         |         |
|----------------------|-----------|-----------|-----------------------|------------|-------|-------------------------|---------|
| Dependent Variable:  |           |           |                       |            |       |                         |         |
|                      | (I)tissue | (J)tissue | Mean Difference (I-J) | Std. Error | Sig.  | 95% Confidence Interval |         |
|                      |           |           |                       |            |       | Bound                   | Bound   |
| LSD                  | WTO       | WTT       | .92091*               | 0.01933    | 0.000 | 0.8763                  | 0.9655  |
|                      |           | HmO       | .29301*               | 0.01933    | 0.000 | 0.2484                  | 0.3376  |
|                      |           | HmT       | .70135*               | 0.01933    | 0.000 | 0.6568                  | 0.7459  |
|                      | WTT       | WTO       | -.92091*              | 0.01933    | 0.000 | -0.9655                 | -0.8763 |
|                      |           | HmO       | -.62791*              | 0.01933    | 0.000 | -0.6725                 | -0.5833 |
|                      |           | HmT       | -.21956*              | 0.01933    | 0.000 | -0.2641                 | -0.1750 |
|                      | HmO       | WTO       | -.29301*              | 0.01933    | 0.000 | -0.3376                 | -0.2484 |
|                      |           | WTT       | .62791*               | 0.01933    | 0.000 | 0.5833                  | 0.6725  |
|                      |           | HmT       | .40834*               | 0.01933    | 0.000 | 0.3638                  | 0.4529  |
|                      | HmT       | WTO       | -.70135*              | 0.01933    | 0.000 | -0.7459                 | -0.6568 |
|                      |           | WTT       | .21956*               | 0.01933    | 0.000 | 0.1750                  | 0.2641  |
|                      |           | HmO       | -.40834*              | 0.01933    | 0.000 | -0.4529                 | -0.3638 |

\*. The mean difference is significant at the 0.05 level.

**nanos2-fw3 rv4**

| Descriptives |    |        |                |            |                                  |        |         |         |
|--------------|----|--------|----------------|------------|----------------------------------|--------|---------|---------|
| tissue       |    |        |                |            |                                  |        |         |         |
|              | N  | Mean   | Std. Deviation | Std. Error | 95% Confidence Interval for Mean |        | Minimum | Maximum |
|              |    |        |                |            | Bound                            | Bound  |         |         |
| WTT          | 3  | 1.0406 | 0.03965        | 0.02289    | 0.9421                           | 1.1391 | 1.00    | 1.08    |
| WTO          | 3  | 0.0609 | 0.01440        | 0.00831    | 0.0251                           | 0.0966 | 0.05    | 0.07    |
| HmT          | 3  | 5.2188 | 0.14736        | 0.08508    | 4.8527                           | 5.5848 | 5.13    | 5.39    |
| HmO          | 2  | 0.0153 | 0.00516        | 0.00365    | -0.0310                          | 0.0617 | 0.01    | 0.02    |
| Total        | 11 | 1.7265 | 2.28530        | 0.68904    | 0.1912                           | 3.2618 | 0.01    | 5.39    |

| Multiple Comparisons |           |           |                       |            |       |                         |         |
|----------------------|-----------|-----------|-----------------------|------------|-------|-------------------------|---------|
| Dependent Variable:  |           |           |                       |            |       |                         |         |
|                      | (I)tissue | (J)tissue | Mean Difference (I-J) | Std. Error | Sig.  | 95% Confidence Interval |         |
|                      |           |           |                       |            |       | Bound                   | Bound   |
| LSD                  | WTT       | WTO       | .97971*               | 0.06691    | 0.000 | 0.8215                  | 1.1379  |
|                      |           | HmT       | -4.17822*             | 0.06691    | 0.000 | -4.3364                 | -4.0200 |
|                      |           | HmO       | 1.02524*              | 0.07481    | 0.000 | 0.8483                  | 1.2021  |
|                      | WTO       | WTT       | -.97971*              | 0.06691    | 0.000 | -1.1379                 | -0.8215 |
|                      |           | HmT       | -5.15793*             | 0.06691    | 0.000 | -5.3162                 | -4.9997 |
|                      |           | HmO       | 0.04552581            | 0.07481    | 0.562 | -0.1314                 | 0.2224  |
|                      | HmT       | WTT       | 4.17822*              | 0.06691    | 0.000 | 4.0200                  | 4.3364  |
|                      |           | WTO       | 5.15793*              | 0.06691    | 0.000 | 4.9997                  | 5.3162  |

|                                                          |     |     |            |         |       |         |         |
|----------------------------------------------------------|-----|-----|------------|---------|-------|---------|---------|
|                                                          |     | HmO | 5.20346*   | 0.07481 | 0.000 | 5.0266  | 5.3804  |
|                                                          | HmO | WTT | -1.02524*  | 0.07481 | 0.000 | -1.2021 | -0.8483 |
|                                                          |     | WTO | -0.0455258 | 0.07481 | 0.562 | -0.2224 | 0.1314  |
|                                                          |     | HmT | -5.20346*  | 0.07481 | 0.000 | -5.3804 | -5.0266 |
| *. The mean difference is significant at the 0.05 level. |     |     |            |         |       |         |         |

**nanos3 -Fw Rv**

| Descriptives |    |         |                |            |                                  |         |         |         |
|--------------|----|---------|----------------|------------|----------------------------------|---------|---------|---------|
| tissue       |    |         |                |            |                                  |         |         |         |
|              | N  | Mean    | Std. Deviation | Std. Error | 95% Confidence Interval for Mean |         | Minimum | Maximum |
|              |    |         |                |            | Bound                            | Bound   |         |         |
| WTT          | 3  | 0.8084  | 0.16853        | 0.09730    | 0.3898                           | 1.2271  | 0.68    | 1.00    |
| WTO          | 3  | 8.7765  | 0.77311        | 0.44635    | 6.8560                           | 10.6970 | 8.17    | 9.65    |
| HmT          | 3  | 2.8339  | 1.15698        | 0.66798    | -0.0402                          | 5.7080  | 2.16    | 4.17    |
| HmO          | 3  | 13.3003 | 0.14105        | 0.08144    | 12.9499                          | 13.6507 | 13.18   | 13.45   |
| Total        | 12 | 6.4298  | 5.18470        | 1.49669    | 3.1356                           | 9.7240  | 0.68    | 13.45   |

| Multiple Comparisons                                     |           |           |                       |            |       |                         |          |
|----------------------------------------------------------|-----------|-----------|-----------------------|------------|-------|-------------------------|----------|
| Dependent Variable:                                      |           |           |                       |            |       |                         |          |
|                                                          | (I)tissue | (J)tissue | Mean Difference (I-J) | Std. Error | Sig.  | 95% Confidence Interval |          |
|                                                          |           |           |                       |            |       | Bound                   | Bound    |
| LSD                                                      | WTT       | WTO       | -7.96808*             | 0.57512    | 0.000 | -9.2943                 | -6.6418  |
|                                                          |           | HmT       | -2.02550*             | 0.57512    | 0.008 | -3.3517                 | -0.6993  |
|                                                          |           | HmO       | -12.49188*            | 0.57512    | 0.000 | -13.8181                | -11.1656 |
|                                                          | WTO       | WTT       | 7.96808*              | 0.57512    | 0.000 | 6.6418                  | 9.2943   |
|                                                          |           | HmT       | 5.94258*              | 0.57512    | 0.000 | 4.6163                  | 7.2688   |
|                                                          |           | HmO       | -4.52380*             | 0.57512    | 0.000 | -5.8500                 | -3.1976  |
|                                                          | HmT       | WTT       | 2.02550*              | 0.57512    | 0.008 | 0.6993                  | 3.3517   |
|                                                          |           | WTO       | -5.94258*             | 0.57512    | 0.000 | -7.2688                 | -4.6163  |
|                                                          |           | HmO       | -10.46637*            | 0.57512    | 0.000 | -11.7926                | -9.1401  |
|                                                          | HmO       | WTT       | 12.49188*             | 0.57512    | 0.000 | 11.1656                 | 13.8181  |
|                                                          |           | WTO       | 4.52380*              | 0.57512    | 0.000 | 3.1976                  | 5.8500   |
|                                                          |           | HmT       | 10.46637*             | 0.57512    | 0.000 | 9.1401                  | 11.7926  |
| *. The mean difference is significant at the 0.05 level. |           |           |                       |            |       |                         |          |

**Table S4. Primer sets for RT PCR and real-time PCR analysis**

| qPCR Primer name            | primer (5'-3')           | bases | Size(bp)    |
|-----------------------------|--------------------------|-------|-------------|
| <i>fshr</i> qfw1            | CCGAGAAGCAGATCAAAGTG     | 20    | 244         |
| <i>fshr</i> qrv2            | TGGAGCGACTGCCTAGCAATAC   | 22    |             |
| <i>miR202</i> Fw1           | CAGACAGGTGAGTCCTCTTC     | 20    | 284         |
| <i>miR202</i> RV2           | CATGTCAAAGAAGTATATGC     | 20    |             |
| <i>miR202</i> Fw1           | CAGACAGGTGAGTCCTCTTC     | 20    | 491         |
| <i>miR202</i> RV3           | GCCTGAAGATTTAACTGATTC    | 21    |             |
| <i>sycp3</i> qfw1           | CCATGGCCAGAGGAAGAAGACAAC | 24    | 226         |
| <i>sycp3</i> qrv2           | CATCTCCTCCATGTTCTTCACA   | 22    |             |
| <i>sycp1</i> qfw1           | CATTCCAGGGTCACCTGAG      | 19    | 303         |
| <i>sycp1</i> qrv2           | CAAAGTGCAGTTCTTGAAT      | 18    |             |
| <i>dynll2</i> qfw3          | GCATATGTCAAGAAGGAAT      | 19    | 257         |
| <i>dynll2</i> qrv4          | GTGCAACACTACCATCATGA     | 20    |             |
| ola <i>sycp3-hdac8</i> fw1  | ccagtggagaaggtggacag     | 20    | As variants |
| ola <i>sycp3</i> exonVI Rv2 | gtagtttcttctgcagcgtggcc  | 23    |             |
| <i>nanos2</i> fw3           | ATGGCCTCGGTGCAAACAACCTG  | 22    | 215         |
| <i>nanos2</i> rv4           | CTGCTGACGGAGCTCGTCTCTG   | 22    |             |
| <i>nanos3</i> Fw            | ATGTCAGACGTGGAGTCTG      | 19    | 190         |
| <i>nanos3</i> Rv            | GCATGTCTCTGTTCAAGTC      | 19    |             |
| <i>actin</i> R              | CCTCCAATCCAGACAGAGTATT   | 22    | 733         |
| <i>actin</i> F              | TTCAACAGCCCTGCCATGTAC    | 21    |             |
| <i>Actin</i> QF             | GTGCTGTCTTTCCCTCCATC     | 20    | 168         |
| <i>Actin</i> QR             | TCTCCATGTATCCCAAGTTG     | 20    |             |

Table S5. Functional annotation and clustering of enriched KEGG pathways responsive to Gsdf signaling

| KEGG_up                               |                                 |           |          |             |          |          |              |       |              |  |
|---------------------------------------|---------------------------------|-----------|----------|-------------|----------|----------|--------------|-------|--------------|--|
| ID                                    | Description                     | GeneRatio | BgRatio  | pvalue      | p.adjust | qvalue   | geneID       | Count | Rich.factor  |  |
| ola03440                              | Homologous recombination        | 2/9       | 40/6707  | 0.001216018 | 0.017024 | 0.01408  | sycp3/sycp3l | 2     | 37.261111111 |  |
| ola03320                              | PPAR signaling pathway          | 2/9       | 83/6707  | 0.005148573 | 0.03604  | 0.029808 | fabp7a/fads2 | 2     | 17.95716198  |  |
| ola00592                              | alpha-Linolenic acid metabolis  | 1/9       | 26/6707  | 0.034372981 | 0.160407 | 0.132668 | fads2        | 1     | 28.66239316  |  |
| ola01040                              | Biosynthesis of unsaturated fat | 1/9       | 43/6707  | 0.056275817 | 0.196965 | 0.162904 | fads2        | 1     | 17.33074935  |  |
| ola00240                              | Pyrimidine metabolism           | 1/9       | 67/6707  | 0.086445596 | 0.202413 | 0.167409 | nme3         | 1     | 11.12271973  |  |
| ola00983                              | Drug metabolism - other enzy    | 1/9       | 69/6707  | 0.088920606 | 0.202413 | 0.167409 | nme3         | 1     | 10.80032206  |  |
| ola01212                              | Fatty acid metabolism           | 1/9       | 79/6707  | 0.10120648  | 0.202413 | 0.167409 | fads2        | 1     | 9.433192686  |  |
| ola04260                              | Cardiac muscle contraction      | 1/9       | 132/6707 | 0.163896159 | 0.262716 | 0.217284 | atp1a3b      | 1     | 5.645622896  |  |
| ola00230                              | Purine metabolism               | 1/9       | 166/6707 | 0.202035859 | 0.262716 | 0.217284 | nme3         | 1     | 4.489290495  |  |
| ola01240                              | Biosynthesis of cofactors       | 1/9       | 167/6707 | 0.203133807 | 0.262716 | 0.217284 | nme3         | 1     | 4.462408516  |  |
| ola04217                              | Necroptosis                     | 1/9       | 170/6707 | 0.206419598 | 0.262716 | 0.217284 | chmp6a       | 1     | 4.383660131  |  |
| ola04261                              | Adrenergic signaling in cardior | 1/9       | 227/6707 | 0.266603952 | 0.311038 | 0.257249 | atp1a3b      | 1     | 3.282917279  |  |
| ola04144                              | Endocytosis                     | 1/9       | 340/6707 | 0.374057698 | 0.382856 | 0.316648 | chmp6a       | 1     | 2.191830065  |  |
| ola04020                              | Calcium signaling pathway       | 1/9       | 350/6707 | 0.382855745 | 0.382856 | 0.316648 | p2rx1        | 1     | 2.129206349  |  |
| remark: Rich factor=GeneRatio/BgRatio |                                 |           |          |             |          |          |              |       |              |  |

| KEGG_down                             |                                |           |          |             |          |          |                   |       |             |  |
|---------------------------------------|--------------------------------|-----------|----------|-------------|----------|----------|-------------------|-------|-------------|--|
| ID                                    | Description                    | GeneRatio | BgRatio  | pvalue      | p.adjust | qvalue   | geneID            | Count | Rich.factor |  |
| ola00561                              | Glycerolipid metabolism        | 2/13      | 71/6707  | 0.007992756 | 0.14387  | 0.134615 | plpp4/dgat2       | 2     | 14.53304442 |  |
| ola04512                              | ECM-receptor interaction       | 2/13      | 107/6707 | 0.017537304 | 0.157836 | 0.147683 | frem1b/lamb3      | 2     | 9.643421999 |  |
| ola00515                              | Mannose type O-glycan biosyn   | 1/13      | 28/6707  | 0.052979059 | 0.181999 | 0.170292 | fut4              | 1     | 18.42582418 |  |
| ola00790                              | Folate biosynthesis            | 1/13      | 29/6707  | 0.05482234  | 0.181999 | 0.170292 | tph1a             | 1     | 17.79045093 |  |
| ola00601                              | Glycosphingolipid biosynthesis | 1/13      | 35/6707  | 0.065812657 | 0.181999 | 0.170292 | fut4              | 1     | 14.74065934 |  |
| ola04514                              | Cell adhesion molecules        | 2/13      | 224/6707 | 0.068000063 | 0.181999 | 0.170292 | cldn15a/claudin-3 | 2     | 4.606456044 |  |
| ola04530                              | Tight junction                 | 2/13      | 256/6707 | 0.085832789 | 0.181999 | 0.170292 | cldn15a/claudin-3 | 2     | 4.030649038 |  |
| ola02010                              | ABC transporters               | 1/13      | 48/6707  | 0.089221523 | 0.181999 | 0.170292 | abcc12            | 1     | 10.74839744 |  |
| ola00380                              | Tryptophan metabolism          | 1/13      | 49/6707  | 0.090999586 | 0.181999 | 0.170292 | tph1a             | 1     | 10.52904239 |  |
| ola00480                              | Glutathione metabolism         | 1/13      | 74/6707  | 0.134423285 | 0.241962 | 0.226397 | anpepb            | 1     | 6.971933472 |  |
| ola00564                              | Glycerophospholipid metabolis  | 1/13      | 111/6707 | 0.195186363 | 0.319396 | 0.29885  | plpp4             | 1     | 4.647955648 |  |
| ola04145                              | Phagosome                      | 1/13      | 167/6707 | 0.279699671 | 0.364423 | 0.34098  | ctsl.1            | 1     | 3.089359742 |  |
| ola04142                              | Lysosome                       | 1/13      | 170/6707 | 0.283987162 | 0.364423 | 0.34098  | ctsl.1            | 1     | 3.034841629 |  |
| ola04140                              | Autophagy - animal             | 1/13      | 184/6707 | 0.30368574  | 0.364423 | 0.34098  | ctsl.1            | 1     | 2.803929766 |  |
| ola04210                              | Apoptosis                      | 1/13      | 184/6707 | 0.30368574  | 0.364423 | 0.34098  | ctsl.1            | 1     | 2.803929766 |  |
| ola04510                              | Focal adhesion                 | 1/13      | 269/6707 | 0.412938829 | 0.464556 | 0.434672 | lamb3             | 1     | 1.917929654 |  |
| ola04144                              | Endocytosis                    | 1/13      | 340/6707 | 0.491822991 | 0.502111 | 0.469812 | dab2              | 1     | 1.517420814 |  |
| ola04020                              | Calcium signaling pathway      | 1/13      | 350/6707 | 0.502111228 | 0.502111 | 0.469812 | ntrk3b            | 1     | 1.474065934 |  |
| remark: Rich factor=GeneRatio/BgRatio |                                |           |          |             |          |          |                   |       |             |  |





**Table S6.** The proportion of Spg2a and Spg2b among the entire EdU positive spermatogonia of normal and *gsdf*-deficient XY testes

| EdU+<br>Germ cells | normal testes ( <i>gsdf</i> <sup>+/+</sup> XY) |       |       | Gsdf-deficient testes ( <i>gsdf</i> <sup>-/-</sup> XY) |       |       |
|--------------------|------------------------------------------------|-------|-------|--------------------------------------------------------|-------|-------|
|                    | No. 1                                          | No. 2 | No. 3 | No. 4                                                  | No. 5 | No. 6 |
| SpgB               | 32                                             | 37    | 10    | 35                                                     | 55    | 36    |
| SpgB2a             | 3                                              | 4     | 1     | 7                                                      | 7     | 9     |
| SpgB2b             | 29                                             | 33    | 9     | 28                                                     | 48    | 27    |
| SpgB2a /SpgB       | 0.094                                          | 0.108 | 0.1   | 0.2                                                    | 0.127 | 0.25  |
| Average rate       | 10.06%                                         |       |       | 19.24%                                                 |       |       |
| SD                 | 0.00343                                        |       |       | 0.00379                                                |       |       |

Table S7 Specific antibodies for immunostaining and Western blot analysis

| <b>Antibody</b>             | <b>Animal</b> | <b>Company</b>    | <b>Antigen</b>                                                                                                         | <b>Dilution of working solution</b> | <b>Note</b> |
|-----------------------------|---------------|-------------------|------------------------------------------------------------------------------------------------------------------------|-------------------------------------|-------------|
| $\alpha$ -PIWIL1            | rabbit        | BBI Life Sciences | fusion protein of human PIWIL1                                                                                         | 1:1000                              | D221136     |
| $\alpha$ -Sycp3             | mouse         | Abcam             | Hamster COR1/SCP3 protein (expressed as 6x His fusion in bacteria and purified on a Talon under denaturing conditions) | 1:1000                              | Ab97672     |
| $\beta$ -actin (HRP-direct) | mouse         | MBL Co.Ltd        | $\beta$ -actin                                                                                                         | 1:10000                             | PM053-7     |
| $\alpha$ -rabbit IgG (HRP)  | goat          | Abcam             | (H+L Chains)(HRP)                                                                                                      | 1:1000                              | ab205718    |
| $\alpha$ -mouse IgG (HRP)   | goat          | Abcam             | (H+L Chains)(HRP)                                                                                                      | 1:1000                              | ab205719    |

Table S8. Proportional distribution of normal and *gsdf*<sup>-/-</sup> gonadal germ cells in prophase of meiosis

| stage<br>tissue | leptotene |         |     | zygotene |         |     | pachytene |         |     | M I phase |         |     |
|-----------------|-----------|---------|-----|----------|---------|-----|-----------|---------|-----|-----------|---------|-----|
|                 | number    | Average | STD | number   | Average | STD | number    | Average | STD | number    | Average | STD |
| WTT             | 32        | 33.4    | 4.1 | 18       | 18.0    | 2.0 | 25        | 24.0    | 2.6 | 24        | 20.7    | 3.1 |
| WTT             | 38        |         |     | 20       |         |     | 26        |         |     | 20        |         |     |
| WTT             | 30        |         |     | 16       |         |     | 21        |         |     | 18        |         |     |
| HmT             | 36        | 33.4    | 2.5 | 40       | 35.3    | 4.2 | 11        | 10.7    | 3.5 | 5         | 5.3     | 2.5 |
| HmT             | 33        |         |     | 32       |         |     | 14        |         |     | 8         |         |     |
| HmT             | 31        |         |     | 34       |         |     | 7         |         |     | 3         |         |     |
| WTO             | 22        | 19.0    | 3.0 | 40       | 40.7    | 3.1 | 27        | 23.7    | 3.1 | 5         | 5.3     | 1.5 |
| WTO             | 16        |         |     | 44       |         |     | 23        |         |     | 7         |         |     |
| WTO             | 19        |         |     | 38       |         |     | 21        |         |     | 4         |         |     |
| HmO             | 58        | 55.0    | 3.0 | 84       | 80.0    | 4.0 | 29        | 26.7    | 2.1 | 9         | 7.3     | 1.5 |
| HmO             | 52        |         |     | 80       |         |     | 25        |         |     | 7         |         |     |
| HmO             | 55        |         |     | 76       |         |     | 26        |         |     | 6         |         |     |

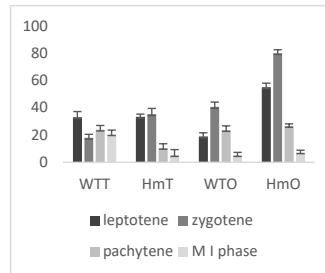

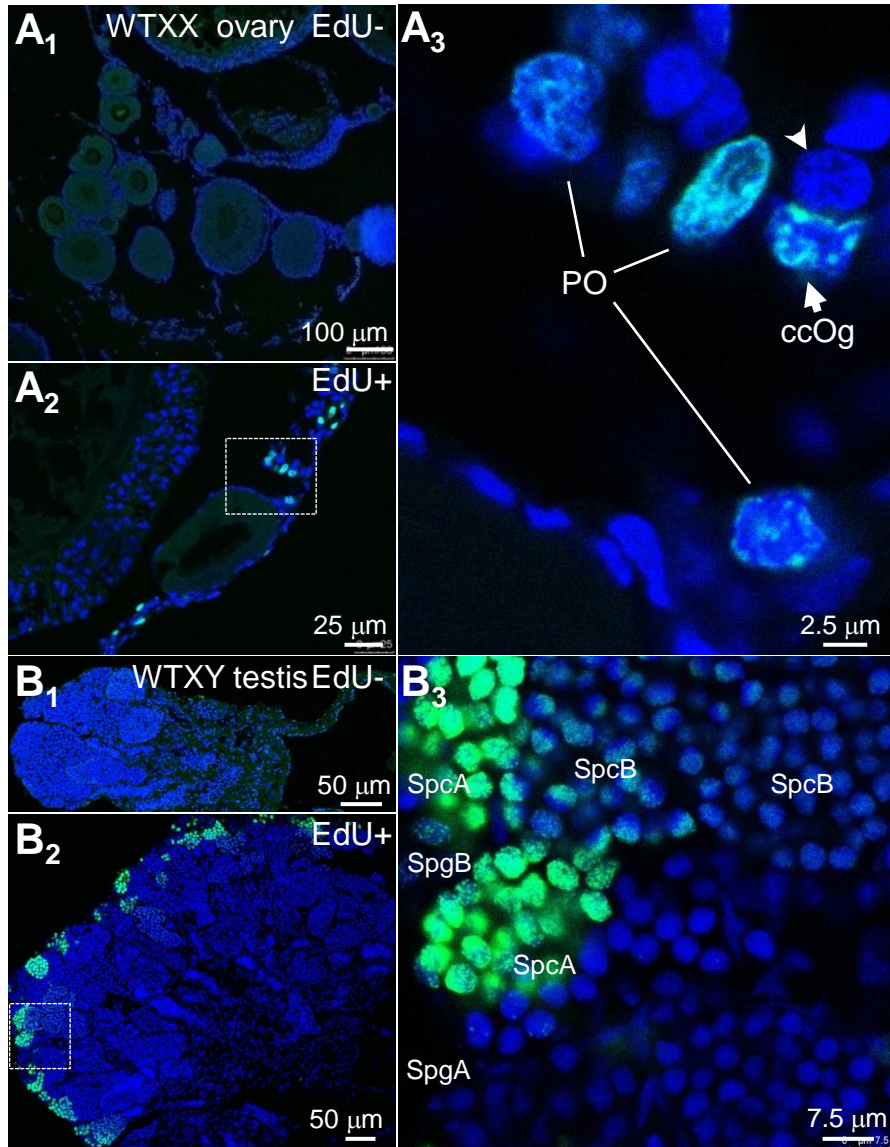

Figure S1. **EdU incorporation features of proliferative XX and XY germ cells.** Green fluorescence was detected in germ cells with EdU+ (A2, ovary; B2, testis) but was absent in EdU- (A1, ovary; B1, testis). A3 and B3 are magnified image of A2 and B2, respectively. ccOg, condensed chromatin oogonia; PO, perinucleolar oocytes; Spg, spermatogonia, Spc, spermatocyte.

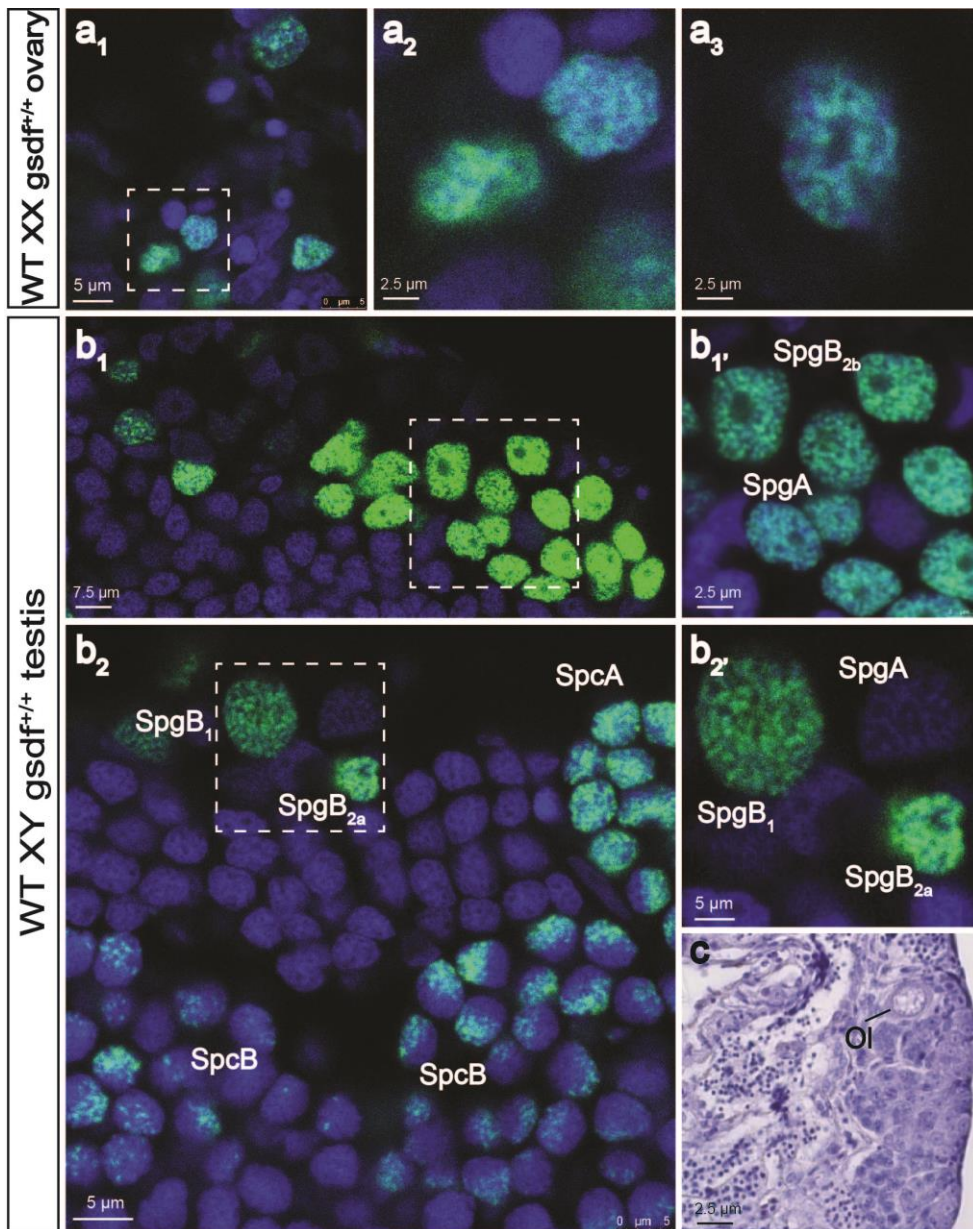

Figure S2. **Morphological changes in the nucleolus of germ cells in normal ovary and testis.** (a) EdU signals in cystic oogonia with larger nucleoli in normal XX ovary at low magnification ( $a_1$ ); magnified images ( $a_2$  and  $a_3$ ). (b) EdU signals in heterologous spermatogonia ( $b_1$ – $b_2'$ ). (c) An oocyte-like (OI) diplotene rarely present in normal XY testes.

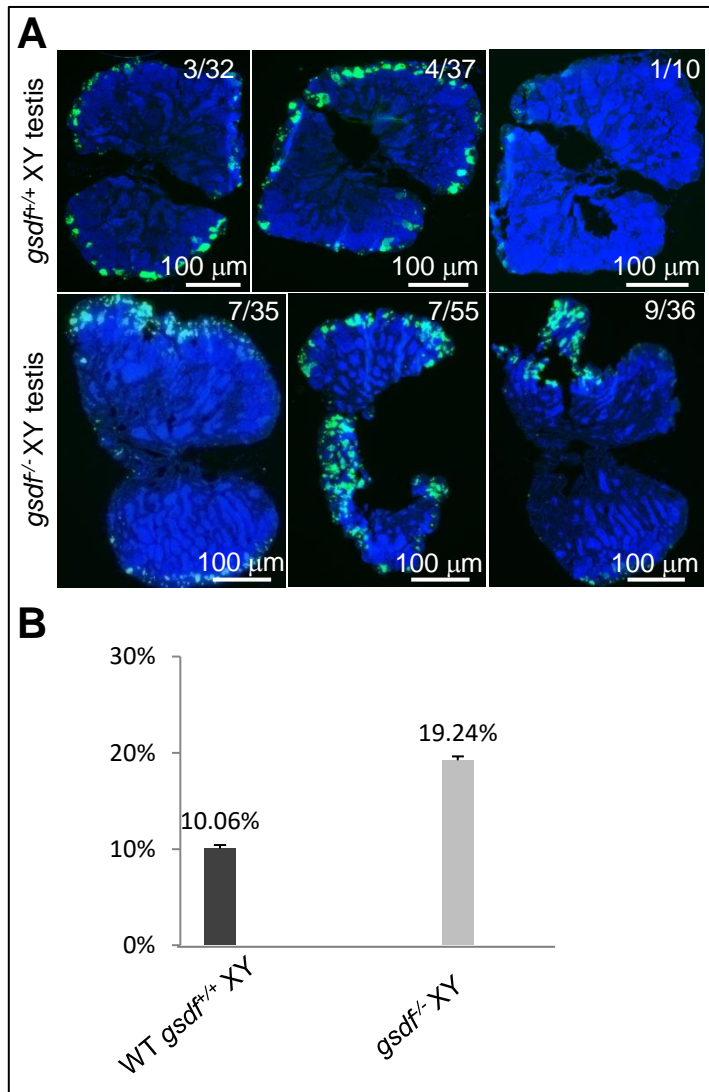

Figure S3. **Proportion of SpgB2a in total SpgB in normal and *gsdf*-deficient testes.** (A) EdU-positive spermatogonia in normal XY testes (upper panel) and *gsdf*<sup>-/-</sup> XY testes (lower panel). (B) The bar graph shows the percentage ratio of SpgB2a to SpgB in intact and defective *gsdf* testes.
